# Supplementary material for: More exogenous Gn starting doses are not beneficial for poor ovarian responders in POSEIDON groups: a propensity score matching retrospective cohort study
Source: Research Square preprint supplement (doi:10.21203/rs.3.rs-6441527/v1), 2025-08-06
Supplement: Supplementary file 1 [file 725e25e3651108fb3a25bcdc.xlsx]

## Sheet: afterPSM
ID	分组	病历号	姓名	年龄分组	年龄	第几取卵	COS方案	COH分组	每日Gn	Gn天数分组	Gn天数	Gn总量分组	Gn总量	扳机	不孕年限	孕次	产次	不孕类型	AMH	BMI分组	体重指数	诊断	扳机日卵泡数	扳机日LH	扳机日E2	扳机日P	获卵数	基础FSH	基础LH	基础E2	波塞冬分组	AFC	扳机日内膜厚度	扳机日内膜形态	实验室授精方式	正常受精卵子总数	有效囊胚	有效胚胎	优质胚胎	新鲜移植胚胎总数	D234移植个数	D567移植个数	周期取消	鲜胚移植	周期结局	妊娠结果	临床妊娠	妊娠类型	妊娠诊断
3	1	2017110141	刘希香	≥35	44	1	降调节方案	3	305.357	＞10天	14	＞3000	4275	HCG	1	4	1	继发不孕	1.22	＞24	28	女方因素	10	0.76	2535	0.89	7	8.56	2.29	70.1	2	15	13.7	A	IVF	3	0	2	0	2	2	0	否	是	移植	未妊娠
5	1	2017030316	郑广健	≥35	39	1	刺激方案	1	375	≤10天	8	≤3000	3000	HCG	3	7	1	继发不孕	1.8	＞24	24.2	女方因素	10	2.16	2267	1.01	6	7.56	2.39	43.5	2	10	7.5	B	IVF	5	0	2	0	0	0	0	否	否	全胚冷冻
13	1	2017030223	杨瑞平	≥35	39	1	刺激方案	1	351.923	＞10天	13	＞3000	4575	HCG	2	1	1	继发不孕	2.21	＞24	28.6	男方因素	10	3.75	2800	0.95	6	9.82	6.45	40	2	11	11.8	A	ICSI	1	0	0	0	0	0	0	是		无可移植胚胎
21	1	C00016908	陈学双	≥35	38	1	降调节方案	3	346.154	＞10天	13	＞3000	4500	HCG	1	3	1	继发不孕	1.92	≤24	20.9	女方因素	10	2.46	2007	1.2	8	9.62	5.36	42.7	2	13	13.2	A	IVF	5	2	2	2	0	0	0	否	否	全胚冷冻
23	1	2016060206	刘伟英	≥35	39	1	降调节方案	3	361.364	＞10天	11	＞3000	3975	HCG	11	2	1	继发不孕	1.74	≤24	22.2	女方因素	8	5.38	2004	0.76	8	8.15	4.66	40	2	11	15	A	IVF	6	0	5	2	2	2	0	否	是	移植	未妊娠
24	1	2017120133	陈晓霞	≥35	41	2	降调节方案	3	328.846	＞10天	13	＞3000	4275	HCG	1	5	1	继发不孕	1.46	≤24	23.7	男方因素	10	1.5	1621	1.02	8	7.4	7.16	78.43	2	12	9.4	A	ICSI	8	0	4	1	2	2	0	否	是	移植	未妊娠
30	1	C00016024	陈晨	＜35	34	1	拮抗剂方案	2	293.75	≤10天	10	≤3000	2937.5	HCG	2	0	0	原发不孕	2.54	≤24	23	男方因素	9	1.44	2678	1.44	9	5.69	3.28	43.29	1	14	12.8	A-B	IVF	2	0	1	0	1	1	0	否	是	移植	未妊娠
35	1	C00003369	周春艳	≥35	40	2	降调节方案	3	300	＞10天	14	＞3000	4200	HCG	3	2	0	继发不孕	1.86	≤24	20.3	女方因素	9	1.07	1443	1.42	5	5.93	4.92	53.77	2	11	12.1	A	IVF	3	0	3	2	2	2	0	否	是	移植	未妊娠
36	1	C00010600	张淑平	≥35	38	2	拮抗剂方案	2	300	＞10天	16	＞3000	4800	双扳机	9	1	0	继发不孕	2.3	≤24	22	女方因素	9	0.17	2420	3.22	5	5.64	3.06	42.13	2	18	9.3	B	IVF	5	0	2	0	0	0	0	否	否	全胚冷冻
41	1	C00006895	王霞	＜35	29	1	刺激方案	1	479.167	＞10天	18	＞3000	8625	HCG	3	0	0	原发不孕	1.6	＞24	33.2	女方因素	9	6.8	2266	2.21	4	13.82	4.77	27.07	1	10	1.3	B	IVF	1	0	0	0	0	0	0	是		无可移植胚胎
42	1	C00007900	张豪丽	＜35	29	1	降调节方案	3	317.308	＞10天	13	＞3000	4125	HCG	4	0	0	原发不孕	1.9	≤24	20	女方因素	9	3.59	2208	1.14	7	4.89	5.14	49	1	9	1.11	A	IVF	6	0	2	0	2	2	0	否	是	移植	未妊娠
43	1	C00006644	时均霞	≥35	44	3	降调节方案	3	311.538	＞10天	13	＞3000	4050	HCG	3	2	1	继发不孕	1.29	＞24	25.8	混合因素	9	1.12	2187	0.78	7	11.56	5.89	33.77	2	12	1.05	A	ICSI	3	0	2	0	2	2	0	否	是	移植	未妊娠
45	1	C00010174	潘光红	≥35	39	1	降调节方案	3	320.455	＞10天	11	＞3000	3525	HCG	0	2	0	继发不孕	2.4	≤24	21.9	女方因素	9	2.57	2082	1.4	5	7.45	4.71	44.93	2	16	1.25	B	IVF	2	0	2	0	2	2	0	否	是	移植	未妊娠
47	1	2018010230	田媛	≥35	38	2	降调节方案	3	360.417	＞10天	12	＞3000	4325	HCG	9	0	0	原发不孕	2.47	＞24	24.4	女方因素	9	2.01	2044	1.06	7	7.4	6.41	55.05	2	9	14.5	B	IVF	5	0	2	0	0	0	0	否	否	全胚冷冻
51	1	C00015149	李金妍	＜35	29	1	拮抗剂方案	2	300	≤10天	7	≤3000	2100	HCG	2	0	0	原发不孕	1.38	≤24	22.6	女方因素	9	7.19	2983	1.2	9	8.32	5.13	39	1	18	9.3	A	IVF	5	0	4	1	2	2	0	否	是	移植	未妊娠
55	1	2016030303	王淑珍	≥35	43	2	刺激方案	1	325	≤10天	9	≤3000	2925	HCG	1	8	1	继发不孕	2.71	≤24	20.3	混合因素	9	2.18	2839	1.22	8	9.78	5.9	63.36	2	11	6.5	B	ICSI	4	0	2	1	0	0	0	否	否	全胚冷冻
61	1	C00012639	翟亚男	≥35	41	4	刺激方案	1	465	≤10天	10	＞3000	4650	HCG	6	0	0	原发不孕	1.93	≤24	20.9	混合因素	9	1.22	2717	1.67	8	8.84	2.98	64	2	15	1.2	A-B	ICSI	3	0	1	0	0	0	0	否	否	全胚冷冻
69	1	C00007104	苏方	≥35	36	3	降调节方案	3	391.667	≤10天	9	＞3000	3525	HCG	1	6	1	继发不孕	2.56	≤24	23	女方因素	9	1.41	2501	0.59	9	7.67	5.32	40	2	20	10.1	A	IVF	5	2	2	0	1	0	1	否	是	移植	未妊娠
70	1	2018070108	任玉娟	≥35	38	1	刺激方案	1	322.5	≤10天	10	＞3000	3225	HCG	6	2	0	继发不孕	1.96	＞24	24.6	女方因素	7	12.37	2158	1.98	5	10.26	5.03	46.43	2	10	4.2	B	IVF	5	0	5	4	0	0	0	否	否	全胚冷冻
73	1	2018030271	王小燕	≥35	35	1	降调节方案	3	356.25	＞10天	12	＞3000	4275	HCG	3	1	1	继发不孕	1.6	＞24	28.8	女方因素	9	1.16	2426	0.51	8	7.52	3.17	23	2	11	10.6	A-B	IVF	4	0	4	0	0	0	0	否	否	全胚冷冻
79	1	C00010672	孙树叶	＜35	31	3	降调节方案	3	400	＞10天	12	＞3000	4800	HCG	2	2	1	继发不孕	1.89	≤24	23.4	混合因素	9	2.15	2254	0.66	5	7.46	6.78	48	1	11	14.6	A-B	ICSI	4	0	2	2	0	0	0	否	否	全胚冷冻
80	1	2018020008	仲伟梅	＜35	30	1	降调节方案	3	330	＞10天	15	＞3000	4950	HCG	3	0	0	原发不孕	1.37	≤24	21.2	女方因素	9	1.97	2251	0.96	6	7.77	2.39	91.75	1	12	14.4	A-B	IVF	3	0	1	0	1	1	0	否	是	移植	已妊娠	临床妊娠	宫内妊娠	单胎宫内妊娠
99	1	2017050106	刘爱君	≥35	43	1	降调节方案	3	375	＞10天	12	＞3000	4500	HCG	4	2	1	继发不孕	2.13	＞24	24.8	男方因素	9	4.64	1936	1.9	8	8.56	6.45	45.48	2	17	10	A	ICSI	6	0	2	0	0	0	0	否	否	全胚冷冻
101	1	2016040270	王圣香	＜35	29	1	降调节方案	3	306.818	＞10天	11	＞3000	3375	HCG	1	0	0	原发不孕	1.23	＞24	24.6	混合因素	7	0.35	1814	1.08	9	6.51	6.65	50.5	1	17	1.4	A	ICSI	6	0	5	3	0	0	0	否	否	全胚冷冻
104	1	C00009297	李秋花	≥35	36	1	刺激方案	1	450	＞10天	13	＞3000	5850	HCG	6	1	1	继发不孕	1.96	≤24	19.1	女方因素	9	16.3	1870	3.58	7	14.34	9.4	13	2	11	1.03	B	IVF	4	0	3	0	0	0	0	否	否	全胚冷冻
105	1	C00010403	张翠玉	＜35	33	4	刺激方案	1	520.588	＞10天	17	＞3000	8850	双扳机	5	1	1	继发不孕	1.33	＞24	29.3	男方因素	9	2.01	1870	2.11	2	9.73	5.45	42	1	14	15.5	B	ICSI	2	0	2	0	0	0	0	否	否	全胚冷冻
106	1	C00010150	李伦伦	＜35	32	1	降调节方案	3	317.647	＞10天	17	＞3000	5400	HCG	4	1	1	继发不孕	1.77	＞24	28.9	女方因素	9	2.22	1870	2.97	7	7.88	6.4	33	1	18	11.3	A-B	IVF	3	0	2	0	0	0	0	否	否	全胚冷冻
110	1	C00017049	申燕燕	＜35	32	1	拮抗剂方案	2	304.545	＞10天	11	＞3000	3350	HCG	2	3	1	继发不孕	2.77	≤24	20.2	女方因素	6	0.67	1775	1.4	8	6.86	5.86	41	1	13	14.5	A	IVF	8	1	5	2	2	2	0	否	是	移植	未妊娠
123	1	2017080200	王小娟	＜35	30	2	降调节方案	3	325	≤10天	9	≤3000	2925	HCG	7	1	0	原发不孕	2.77	＞24	28	男方因素	9	0.61	1094	1.59	5	5.9	2.42	42	1	12	#NULL!		ICSI	1	0	1	0	1	1	0	否	是	移植	已妊娠	临床妊娠	宫内妊娠	单胎宫内妊娠
130	1	C00016636	徐利立	＜35	31	1	降调节方案	3	480	＞10天	15	＞3000	7200	HCG	5	2	1	继发不孕	2.11	＞24	35.8	女方因素	8	0.19	1832	0.78	6	6.87	4.14	24.86	1	14	10.8	A-B	IVF	3	0	0	0	0	0	0	是		无可移植胚胎
131	1	C00004187	张敏	≥35	42	4	刺激方案	1	429.545	＞10天	11	＞3000	4725	HCG	5	1	0	继发不孕	1.13	＞24	29.1	女方因素	8	7.89	1690	1.15	6	9.8	4.85	77.07	4	8	0.61	B	IVF	2	0	2	0	0	0	0	否	否	全胚冷冻
135	1	2016090060	JANG SANGYOON	＜35	30	1	降调节方案	3	300	＞10天	11	＞3000	3300	HCG	1	0	0	原发不孕	2.41	≤24	20.4	女方因素	8	3.8	1550	0.2	8	9.72	6.98	41	1	10	13.8	A-B	IVF	0	0	0	0	0	0	0	是		无可移植胚胎
138	1	2016020069	刘玉华	≥35	40	1	刺激方案	1	300	≤10天	8	≤3000	2400	HCG	3	1	0	继发不孕	1.8	≤24	22	女方因素	6	4.33	2010	0.91	9	11.7	4.37	33	2	10	8.6	A	IVF	7	0	5	1	2	2	0	否	是	移植	已妊娠	临床妊娠	宫内妊娠	单胚胎停
142	1	2018050026	李同	＜35	26	2	降调节方案	3	384.375	＞10天	16	＞3000	6150	HCG	2	0	0	原发不孕	2.89	＞24	33.2	男方因素	8	0.35	2243	1.88	5	7.35	4.33	36.43	1	15	13.1	A-B	ICSI	1	0	0	0	0	0	0	是		无可移植胚胎
144	1	C00004092	赵淑兰	≥35	39	1	降调节方案	3	300	＞10天	11	＞3000	3300	HCG	1	4	2	继发不孕	2.30	＞24	24.8	女方因素	8	2.12	2208	1.82	9	8.2	3.94	38.2	2	12	10.3	A	IVF	6	1	3	2	1	1	0	否	是	移植	已妊娠	临床妊娠	宫内妊娠	单胎宫内妊娠
146	1	C00013119	郭晓蝶	＜35	30	1	降调节方案	3	611.682	＞10天	11	＞3000	6728.5	HCG	3	0	0	原发不孕	3.05	≤24	19.6	男方因素	8	1.76	2168	0.5	8	5.87	4.62	32.4	1	16	12.5	A	ICSI	5	0	4	1	2	2	0	否	是	移植	已妊娠	临床妊娠	宫内妊娠	单胎宫内妊娠
148	1	2016060026	王静	≥35	37	1	降调节方案	3	345	＞10天	15	＞3000	5175	HCG	1	6	1	继发不孕	1.87	≤24	21.3	女方因素	8	0.35	2008	0.7	4	6.16	4.52	47.71	2	12	10.5	A-B	IVF	3	0	2	0	2	2	0	否	是	移植	已妊娠	临床妊娠	宫内妊娠	单胎宫内妊娠
152	1	C00008463	刘明雪	≥35	40	2	降调节方案	3	294.643	＞10天	14	＞3000	4125	HCG	5	3	1	继发不孕	2.37	＞24	26.7	女方因素	8	1.48	1935	0.69	9	14.08	6.07	31	2	10	8.9	A	IVF	6	0	2	0	2	2	0	否	是	移植	已妊娠	临床妊娠	宫内妊娠	单胚胎停
162	1	2016090221	刘娜	＜35	32	2	降调节方案	3	400	＞10天	15	＞3000	6000	HCG	3	0	0	原发不孕	2.49	＞24	25.7	女方因素	8	0.59	1762	1.24	8	6.89	5.39	26.43	1	12	20.2	B	IVF	7	0	2	0	2	2	0	否	是	移植	已妊娠	临床妊娠	宫内妊娠	单胎宫内妊娠
163	1	2017050036	刘梅	＜35	31	1	刺激方案	1	300	≤10天	10	≤3000	3000	HCG	2	1	1	继发不孕	1.96	＞24	27.3	女方因素	8	7.11	2706	0.77	5	8.34	5.63	66.43	1	9	9.4	B	IVF	3	0	2	0	0	0	0	否	否	全胚冷冻
165	1	C00004102	巩加喜	≥35	49	2	拮抗剂方案	2	450	≤10天	8	＞3000	3600	双扳机	4	2	1	继发不孕	1.13	≤24	22	男方因素	8	2.45	2665	1.06	5	7.3	4.14	28	4	11	10.9	A	ICSI	3	0	2	0	0	0	0	否	否	全胚冷冻
169	1	C00018274	张俊丽	＜35	33	2	刺激方案	1	300	≤10天	7	≤3000	2100	HCG	2	3	2	继发不孕	1.79	≤24	23.4	女方因素	8	2.89	2538.44	0.68	7	7.88	6.07	29.41	1	14	10.3	A	IVF	5	0	4	0	0	0	0	否	否	全胚冷冻
175	1	C00006402	王俊	＜35	30	1	降调节方案	3	361.765	＞10天	17	＞3000	6150	HCG	4	0	0	原发不孕	1.56	＞24	28.7	混合因素	8	1.16	2385	1.26	7	5.4	4.08	30	1	22	0.92	A	ICSI	3	0	2	0	2	2	0	否	是	移植	已妊娠	临床妊娠	宫内妊娠	单胎宫内妊娠
179	1	C00016253	于明月	≥35	37	1	降调节方案	3	300	≤10天	9	≤3000	2700	HCG	1	1	1	继发不孕	3.76	＞24	27.3	女方因素	8	1.32	2311	0.58	8	5.17	4.12	40.63	2	14	12.3	B	IVF	5	0	2	0	2	2	0	否	是	移植	未妊娠
183	1	C00009709	孟丛	＜35	29	2	刺激方案	1	300	≤10天	9	≤3000	2700	HCG	4	0	0	原发不孕	2.58	≤24	21.1	男方因素	8	6.55	2265	2.22	9	6.2	4.23	84.41	1	13	0.8	A	ICSI	4	0	0	0	0	0	0	是		无可移植胚胎
190	1	C00017361	曹秀杰	≥35	36	2	拮抗剂方案	2	316.071	＞10天	14	＞3000	4425	双扳机	2	4	2	原发不孕	0.87	≤24	16	女方因素	8	0.74	2123	1.06	0	6.11	5.79	34	4	6	#NULL!			0	0	0	0	0	0	0	是		未取到卵
191	1	2018020094	康苹	＜35	34	1	降调节方案	3	308.929	＞10天	14	＞3000	4325	HCG	2	2	1	继发不孕	1.23	≤24	22.8	女方因素	8	1.2	2122	0.75	7	8.55	3.05	50	1	10	13.3	A	IVF	2	0	3	0	1	1	0	否	是	移植	已妊娠	临床妊娠	宫外妊娠	异位妊娠
202	1	C00012294	张燕	≥35	40	1	拮抗剂方案	2	375	≤10天	8	≤3000	3000	HCG	4	4	2	继发不孕	1.41	≤24	23.4	女方因素	8	2.71	1903	0.76	8	7.05	2.8	43	2	15	1.02	A	IVF	5	0	4	1	0	0	0	否	否	全胚冷冻
204	1	2018020037	徐银芳	≥35	42	1	降调节方案	3	381.818	＞10天	11	＞3000	4200	HCG	2	0	0	原发不孕	1.89	≤24	21.6	女方因素	8	0.85	1870	1.23	8	8.5	3.2	50	2	12	1.14	A	IVF	3	2	2	0	0	0	0	否	否	全胚冷冻
205	1	C00003591	孙晓玲	≥35	40	1	降调节方案	3	293.182	＞10天	11	＞3000	3225	HCG	1	2	1	继发不孕	1.59	≤24	21.6	女方因素	8	0.97	1863	1.17	9	6.68	5.78	16	2	13	10.8	A-B	IVF	5	0	2	0	2	2	0	否	是	移植	已妊娠	临床妊娠	宫内妊娠	单胚胎停
220	1	C00012340	王小霞	≥35	37	1	拮抗剂方案	2	329.167	≤10天	9	≤3000	2962.5	HCG	8	3	1	继发不孕	2.24	＞24	25.4	混合因素	8	2.42	1634	0.16	6	9.38	2.3	38	2	11	12.5	A	ICSI	2	0	2	1	2	2	0	否	是	移植	已妊娠	临床妊娠	宫内妊娠	单胎宫内妊娠
223	1	2018030204	郭欣	≥35	37	1	降调节方案	3	305.769	＞10天	13	＞3000	3975	HCG	1	3	0	继发不孕	3.070	≤24	16.5	不明原因	8	0.82	1572	0.81	4	16.55	5.68	53	2	8	14.6	A	IVF	4	0	4	1	0	0	0	否	否	全胚冷冻
225	1	2016020110	崔文娟	≥35	39	2	降调节方案	3	455.357	＞10天	14	＞3000	6375	HCG	2	3	0	继发不孕	1.55	≤24	23	不明原因	8	1.16	1548	1.06	5	9.19	4.26	66.06	2	12	13	A-B	IVF	3	0	2	2	2	2	0	否	是	移植	未妊娠
227	1	C00009464	刘绍美	≥35	40	1	降调节方案	3	300	≤10天	9	≤3000	2700	HCG	1	1	1	继发不孕	2.4	≤24	23.8	女方因素	8	1.46	1450	2.82	7	4.98	6.46	34.5	2	20	11.5	A	IVF	1	0	0	0	0	0	0	是		无可移植胚胎
230	1	C00011519	韩洋	≥35	36	5	刺激方案	1	300	≤10天	7	≤3000	2100	HCG	3	3	1	继发不孕	2.1	≤24	19.9	女方因素	5	10.67	1813	0.94	7	9.05	4.83	51	2	11	0.36	A	IVF	6	0	5	0	0	0	0	否	否	全胚冷冻
235	1	C00018013	张艳	≥35	41	2	降调节方案	3	311.25	≤10天	10	＞3000	3112.5	HCG	2	0	0	原发不孕	1.80	＞24	24.2	女方因素	8	2.29	1204	0.49	7	7.22	3.61	39.72	2	11	12.1	B	IVF	6	0	2	0	0	0	0	否	否	全胚冷冻
240	1	C00004793	李洋	＜35	29	2	降调节方案	3	300	≤10天	7	≤3000	2100	HCG	5	1	0	继发不孕	2.47	≤24	21.1	女方因素	8	0.16	1015	2.25	8	6.87	3.43	52	1	15	0.9	A	IVF	7	0	4	0	0	0	0	否	否	全胚冷冻
242	1	2017110094	杨景淑	＜35	32	1	降调节方案	3	490.909	＞10天	11	＞3000	5400	HCG	5	0	0	原发不孕	2.5	＞24	29.3	不明原因	8	1.18	1184	0.58	9	7.91	5.56	20.37	1	14	#NULL!		IVF	4	0	4	1	2	2	0	否	是	移植	已妊娠	临床妊娠	宫内妊娠	双胎宫内妊娠
247	1	C00006926	郑文芳	≥35	44	1	拮抗剂方案	2	366.667	≤10天	9	＞3000	3300	HCG	5	0	0	原发不孕	1.7	＞24	24.1	混合因素	7	2.42	1910	1.33	6	10.67	5.36	10	2	8	10	B	ICSI	0	0	1	0	1	1	0	否	是	移植	未妊娠
255	1	C00008187	刘秋娟	≥35	35	1	降调节方案	3	305.357	＞10天	14	＞3000	4275	HCG	3	2	1	继发不孕	2.59	≤24	23.2	女方因素	7	1.38	1719	0.9	9	11.73	4.17	41	2	13	1.3	A-B	IVF	9	0	4	2	2	2	0	否	是	移植	未妊娠
256	1	C00009425	阮洪荣	≥35	42	2	刺激方案	1	450	＞10天	11	＞3000	4950	HCG	2	0	0	原发不孕	1.09	≤24	22	女方因素	7	13.37	1676	2.2	1	14.22	5.34	32	4	6	0.62	A-B	IVF	0	0	0	0	0	0	0	是		未受精
259	1	2017020046	刘正香	≥35	44	2	刺激方案	1	307.5	≤10天	10	＞3000	3075	HCG	3	5	0	继发不孕	0.39	＞24	26.6	女方因素	7	0.99	2609	0.95	6	7.78	5.28	57.62	4	10	9.3	A	IVF	2	0	1	0	1	1	0	否	是	移植	未妊娠
262	1	C00016648	贾晓婷	＜35	28	2	降调节方案	3	381.818	＞10天	11	＞3000	4200	HCG	1	0	0	继发不孕	2.19	＞24	24.6	女方因素	7	2.55	1548	1.24	6	8.76	2.49	27	1	10	12.2	B	IVF	3	2	2	0	1	0	1	否	是	移植	已妊娠	临床妊娠	宫内妊娠	单胎宫内妊娠
263	1	C00008831	孙蒙	＜35	31	1	降调节方案	3	300	≤10天	10	≤3000	3000	HCG	2	0	0	原发不孕	4.02	≤24	22.8	女方因素	7	3.69	1479	1.02	7	6.3	5.4	70	1	25	10.5	A	IVF	5	0	4	0	2	2	0	否	是	移植	已妊娠	临床妊娠	宫内妊娠	单胎宫内妊娠
264	1	2016110269	张汝燕	＜35	33	2	刺激方案	1	300	≤10天	10	≤3000	3000	HCG	8	1	1	原发不孕	1.96	≤24	17.7	女方因素	7	1.42	2466	1.59	6	8.65	8.68	39	1	9	11.9	A	IVF	5	0	4	3	0	0	0	否	否	全胚冷冻
266	1	2018020081	牛光会	＜35	34	1	降调节方案	3	309.091	＞10天	11	＞3000	3400	HCG	1	3	0	继发不孕	2.53	＞24	26.4	女方因素	7	4.63	2411	1.69	8	6.53	5.61	69.73	1	10	9.6	A	IVF	5	0	4	1	2	2	0	否	是	移植	未妊娠
268	1	C00017196	邢芸	＜35	31	5	刺激方案	1	300	≤10天	9	≤3000	2700	HCG	3	1	1	继发不孕	3.1	≤24	21.5	男方因素	7	6.34	2304	1.12	6	8.2	3.06	41	1	12	5.3	A	ICSI	4	0	2	1	0	0	0	否	否	全胚冷冻
270	1	2017020142	郄慧芝	≥35	44	1	降调节方案	3	300	≤10天	9	≤3000	2700	HCG	2	1	1	继发不孕	2.45	≤24	23.4	女方因素	7	9.13	2274	0.64	7	6.85	4.23	59.86	2	10	10.6	A	IVF	1	0	1	0	0	0	0	否	否	全胚冷冻
273	1	C00011557	乔锰	≥35	40	1	刺激方案	1	300	≤10天	9	≤3000	2700	HCG	4	2	1	继发不孕	1.44	≤24	23.9	女方因素	7	13.92	2170	0.75	6	6.9	2.87	46.84	2	11	0.69	B	IVF	3	0	4	0	0	0	0	否	否	全胚冷冻
274	1	2016040287	段凯英	≥35	40	3	刺激方案	1	375	≤10天	6	≤3000	2250	HCG	2	1	1	继发不孕	1.64	≤24	22.9	混合因素	7	3.39	2164	0.75	7	7.67	4.91	40	2	13	6.2	A	ICSI	5	0	1	0	0	0	0	否	否	全胚冷冻
275	1	2017080115	王静	＜35	31	1	刺激方案	1	300	≤10天	9	≤3000	2700	HCG	1	1	0	继发不孕	1.78	≤24	22.5	女方因素	7	8.78	2153	0.96	8	6.38	4.4	33.36	1	11	9	A-B	IVF	4	0	2	0	0	0	0	否	否	全胚冷冻
280	1	C00013070	王玮玮	≥35	39	2	刺激方案	1	375	＞10天	12	＞3000	4500	HCG	6	1	1	继发不孕	1.69	≤24	23.4	女方因素	7	3.63	2114	0.85	8	13.11	4.99	52	2	11	1.45	A	IVF	6	0	2	0	2	2	0	否	是	移植	未妊娠
285	1	C00004951	王红娟	≥35	44	1	刺激方案	1	436.364	＞10天	11	＞3000	4800	HCG	3	3	1	继发不孕	1.31	＞24	25	女方因素	7	19.15	2027	1.07	6	5.39	3.04	60.6	2	7	0.45	A-B	IVF	5	0	4	3	0	0	0	否	否	全胚冷冻
288	1	2016100185	张桂芳	≥35	39	1	刺激方案	1	300	≤10天	7	≤3000	2100	HCG	2	7	1	继发不孕	1.61	≤24	17.4	女方因素	7	1.92	1872	1.72	7	7.7	5.98	35.42	2	10	8.5	A	IVF	0	0	0	0	0	0	0	是		无可移植胚胎
290	1	C00009492	王倩倩	＜35	32	1	刺激方案	1	450	≤10天	9	＞3000	4050	HCG	4	0	0	原发不孕	2.79	＞24	24.4	女方因素	7	5.53	1831	1.51	4	5.53	4.14	49	1	12	0.87		IVF	1	0	4	0	0	0	0	否	否	全胚冷冻
291	1	2017120030	孟庆妹	≥35	45	3	拮抗剂方案	2	300	＞10天	15	＞3000	4500	双扳机	2	7	1	继发不孕	0.63	＞24	24.2	混合因素	3	1.86	662	0.57	4	12.88	4.29	80.6	4	6	7.1	A	ICSI	5	0	5	1	0	0	0	否	否	全胚冷冻
293	1	2018040253	苏海燕	＜35	30	1	降调节方案	3	360	＞10天	15	＞3000	5400	HCG	2	1	0	继发不孕	2.55	＞24	26.8	女方因素	10	1.59	2886	0.64	8	7.9	3.21	47.71	1	14	15.2	A	IVF	6	0	6	2	0	0	0	否	否	全胚冷冻
304	1	2016080056	张金玲	＜35	30	1	刺激方案	1	346.154	＞10天	13	＞3000	4500	HCG	1	3	0	继发不孕	2.53	＞24	28	女方因素	7	1.98	2457	2.23	8	6.91	3.02	47.71	1	9	9	B	IVF	7	0	2	0	0	0	0	否	否	全胚冷冻
306	1	C00010998	孟庆霞	≥35	44	2	刺激方案	1	300	≤10天	10	≤3000	3000	HCG	8	4	1	继发不孕	1.45	＞24	28	女方因素	7	3.65	2380	0.76	6	7.41	5.31	27.1	2	14	0.7	B	IVF	4	1	3	0	0	0	0	否	否	全胚冷冻
307	1	C00011954	薛爱华	≥35	48	3	刺激方案	1	300	≤10天	8	≤3000	2400	HCG	3	2	1	继发不孕	0.33	＞24	25	女方因素	7	6.07	2379	0.6	5	10.12	4.54	17	4	8	0.52	A	IVF	4	0	2	1	0	0	0	否	否	全胚冷冻
309	1	C00018947	李保丽	≥35	43	2	降调节方案	3	311.111	≤10天	9	≤3000	2800	HCG	3	3	1	继发不孕	1.87	≤24	22.9	女方因素	7	1.92	2292.72	0.98	7	5.98	4.53	48	2	12	12.8	B	IVF	2	0	2	0	0	0	0	否	否	全胚冷冻
312	1	C00017333	关丽娜	＜35	33	1	拮抗剂方案	2	300	＞10天	11	＞3000	3300	HCG	1	0	0	原发不孕	1.99	≤24	19.4	女方因素	7	1.94	2235	1.37	8	7.16	4.75	55	1	12	11	A	IVF	7	0	2	1	2	2	0	否	是	移植	未妊娠
316	1	C00009141	田雪莲	≥35	40	1	刺激方案	1	450	≤10天	10	＞3000	4500	HCG	2	1	1	继发不孕	1.9	≤24	18.8	女方因素	7	7.09	2215	1.76	7	6.83	5.27	58.71	2	14	0.75	B	IVF	2	2	2	0	0	0	0	否	否	全胚冷冻
319	1	2017110192	刘秀蓬	≥35	43	2	降调节方案	3	300	≤10天	9	≤3000	2700	HCG	5	3	1	继发不孕	0.46	≤24	21.5	混合因素	7	1.22	2178	0.73	6	10.37	3.8	57	4	7	6.3	B-C	ICSI	5	0	2	1	0	0	0	否	否	全胚冷冻
321	1	2016100074	卜淑娟	≥35	36	6	刺激方案	1	300	≤10天	9	≤3000	2700	HCG	5	3	0	继发不孕	2.42	≤24	16.4	女方因素	7	0.97	2162	1.37	8	7.38	2.08	40.21	2	9	10.2		IVF	4	0	2	1	0	0	0	否	否	全胚冷冻
328	1	2017020107	范秋玲	≥35	39	4	降调节方案	3	350	≤10天	10	＞3000	3500	HCG	4	2	1	继发不孕	0.9	≤24	23.4	男方因素	7	1.45	2119	1.38	4	11.86	3.74	67	4	7	14.9	A	ICSI	4	0	4	2	2	2	0	否	是	移植	未妊娠
333	1	2017080193	岳园园	＜35	29	2	刺激方案	1	300	＞10天	11	＞3000	3300	HCG	3	0	0	原发不孕	1.52	＞24	30	男方因素	7	2.83	2018	1.27	8	5.87	5.59	19.6	1	12	12.1	B	ICSI	7	0	4	2	2	2	0	否	是	移植	未妊娠
340	1	2017030246	刘春娥	≥35	38	1	刺激方案	1	352.941	＞10天	17	＞3000	6000	HCG	6	1	1	原发不孕	2.93	＞24	29.1	女方因素	7	1.64	1927	0.87	5	7.93	4.87	69	2	8	12.5	B	IVF	4	0	4	4	2	2	0	否	是	移植	已妊娠	临床妊娠	宫内妊娠	单胎宫内妊娠
346	1	2017100212	张三云	≥35	42	1	降调节方案	3	300	＞10天	11	＞3000	3300	HCG	1	0	0	原发不孕	2.18	＞24	25.2	男方因素	7	2.47	1872	0.42	6	10	2.66	69	2	18	16.9	A	ICSI	4	0	3	0	2	2	0	否	是	移植	未妊娠
349	1	2016080034	隋丽	＜35	33	1	降调节方案	3	318.182	＞10天	11	＞3000	3500	HCG	3	0	0	继发不孕	1.67	＞24	26	女方因素	7	0.25	1857	0.57	5	14.34	4.71	30	1	10	9.5	A	IVF	5	0	4	1	2	2	0	否	是	移植	未妊娠
352	1	C00004390	张启艳	≥35	41	2	降调节方案	3	316.667	≤10天	9	≤3000	2850	HCG	2	4	1	继发不孕	1.47	≤24	24	女方因素	7	0.45	1839	1.12	8	8.05	2.17	66.43	2	15	11.3	A	IVF	0	0	0	0	0	0	0	否	否	全胚冷冻
353	1	2016060256	王传冬	≥35	42	2	刺激方案	1	313.636	＞10天	11	＞3000	3450	HCG	2	4	1	继发不孕	0.65	＞24	25.4	混合因素	7	7.98	1831	3.46	5	12.89	6.72	25.52	4	5	11.7	B	ICSI	1	0	1	0	0	0	0	否	否	全胚冷冻
357	1	2017110223	刘琳	≥35	35	2	降调节方案	3	308.333	＞10天	18	＞3000	5550	HCG	1	2	1	继发不孕	1.6	＞24	24.6	女方因素	7	1.07	1820	0.56	5	6.53	2.15	59.09	2	11	13.8	A-B	IVF	3	1	3	0	0	0	0	否	否	全胚冷冻
359	1	C00008942	于雪萍	≥35	38	2	降调节方案	3	407.143	＞10天	14	＞3000	5700	HCG	2	0	0	原发不孕	2.26	≤24	17.6	女方因素	9	1.72	1858	1.06	8	8.99	5.72	38.58	2	14	1.34	A	IVF	6	0	6	1	2	2	0	否	是	移植	已妊娠	临床妊娠	宫内妊娠	单胎宫内妊娠
361	1	C00003537	刘俊芝	≥35	39	1	降调节方案	3	368.182	＞10天	11	＞3000	4050	HCG	1	2	1	继发不孕	1.34	≤24	24	女方因素	7	1.91	1801	1.1	7	9.5	4.71	40	2	12	1.02	A	IVF	4	0	2	0	2	2	0	否	是	移植	未妊娠
367	1	2017060139	朱艳苓	≥35	38	3	刺激方案	1	293.75	＞10天	12	＞3000	3525	HCG	12	4	1	继发不孕	1.01	≤24	18	女方因素	7	20.52	1739	2.09	7	10.99	8.56	77.07	4	7	5.1	B	IVF	5	0	1	0	0	0	0	否	否	全胚冷冻
368	1	C00015089	李小会	≥35	35	2	刺激方案	1	443.182	＞10天	11	＞3000	4875	HCG	6	1	0	继发不孕	1.29	＞24	24.9	女方因素	7	3.21	1728	0.75	4	11.84	4.6	55	2	11	1.16	A	IVF	2	0	0	0	0	0	0	是		无可移植胚胎
369	1	2017110283	张静丽	＜35	24	2	降调节方案	3	318.75	＞10天	12	＞3000	3825	HCG	2	2	1	继发不孕	3.80	＞24	25.7	不明原因	7	1.71	1724	1.37	9	4.3	4.6	37.84	1	17	10.1	B	IVF	7	0	3	1	2	2	0	否	是	移植	未妊娠
377	1	2018030056	马林林	＜35	26	1	刺激方案	1	315	≤10天	10	＞3000	3150	HCG	3	0	0	原发不孕	2.24	≤24	23.4	女方因素	7	17.66	1600	2.64	5	9.09	6.24	83.77	1	10	9.7	A	IVF	0	0	0	0	0	0	0	是		未受精
379	1	2017010027	王凤儒	≥35	38	3	降调节方案	3	340.909	＞10天	11	＞3000	3750	HCG	1	3	1	继发不孕	1.53	≤24	22.5	女方因素	7	1.28	1593	0.38	3	8.42	8.32	73.4	2	10	16.6	B	IVF	1	0	1	1	0	0	0	否	否	全胚冷冻
393	1	C00018544	陈双	＜35	33	2	降调节方案	3	300	＞10天	16	＞3000	4800	HCG	4	2	0	继发不孕	1.62	＞24	24.7	女方因素	7	1.51	1400.54	1.11	3	8.33	2.17	45	1	8	1.26	B	IVF	3	0	1	1	0	0	0	否	否	全胚冷冻
394	1	2016100191	朱艳苓	≥35	37	1	刺激方案	1	380.357	＞10天	14	＞3000	5325	HCG	12	4	1	继发不孕	1.44	≤24	18	女方因素	7	1.77	1394	2.45	4	10.99	8.56	77.07	2	7	15	A-B	IVF	3	0	0	0	0	0	0	是		无可移植胚胎
397	1	2016030196	李玉连	≥35	39	1	刺激方案	1	312.5	＞10天	12	＞3000	3750	HCG	7	1	0	继发不孕	1.67	≤24	21.4	女方因素	7	2.07	1367	1.52	8	6.98	4.12	55.42	2	12	11	A	IVF	7	0	2	0	2	2	0	否	是	移植	已妊娠	临床妊娠	宫内妊娠	双胎宫内妊娠
403	1	C00004863	王圆圆	＜35	29	1	拮抗剂方案	2	314.286	＞10天	14	＞3000	4400	HCG	3	2	0	继发不孕	2.52	≤24	22.3	女方因素	7	1.09	1283	0.33	8	10.41	4.92	75	1	15	10.6	A	IVF	5	0	2	1	2	2	0	否	是	移植	已妊娠	临床妊娠	宫外妊娠	异位妊娠
407	1	C00009307	柏海云	≥35	41	1	降调节方案	3	321.154	＞10天	13	＞3000	4175	HCG	6	0	0	原发不孕	1.86	＞24	28.7	女方因素	7	2.13	1270	1.02	5	7.82	4.57	19	2	12	1.26	A	IVF	2	0	2	1	2	2	0	否	是	移植	未妊娠
421	1	2017030092	鲁桂芹	≥35	38	3	刺激方案	1	405	＞10天	15	＞3000	6075	HCG	1	1	0	继发不孕	2.64	＞24	29.3	女方因素	7	0.95	1010	1.7	8	8.25	2.25	34.76	2	10	10.6	A	IVF	2	0	2	1	0	0	0	否	否	全胚冷冻
422	1	2016020129	丁海霞	≥35	40	1	降调节方案	3	300	≤10天	7	≤3000	2100	HCG	1	2	2	继发不孕	1.33	≤24	23.4	女方因素	7	1.07	1838	1.26	9	7.61	7.33	26	2	15	8.4	A	IVF	3	0	2	1	2	2	0	否	是	移植	未妊娠
424	1	2016010047	刘明芝	＜35	28	1	刺激方案	1	357.692	＞10天	13	＞3000	4650	HCG	4	0	0	原发不孕	2.94	＞24	35.5	女方因素	7	0.47	1067	0.58	8	6.47	3.91	50.1	1	10	10.5	B	IVF	4	0	2	1	2	2	0	否	是	移植	未妊娠
427	1	2017040152	李莉萍	＜35	34	1	刺激方案	1	405	≤10天	10	＞3000	4050	HCG	3	2	1	继发不孕	1.94	≤24	19.2	女方因素	6	2.75	963	1.47	6	8.66	8.23	43.5	1	9	8.2	B	IVF	2	0	1	1	0	0	0	否	否	全胚冷冻
429	1	2017110281	于静	≥35	36	3	拮抗剂方案	2	312.5	≤10天	8	≤3000	2500	HCG	2	0	0	原发不孕	1.9	≤24	23.6	混合因素	6	5.47	931	0.7	6	8.93	2.69	41.75	2	10	11.3	A	ICSI	4	0	1	0	0	0	0	否	否	全胚冷冻
431	1	C00018588	王占香	≥35	42	2	拮抗剂方案	2	300	≤10天	9	≤3000	2700	HCG	2	4	2	继发不孕	1.3	＞24	24.9	女方因素	6	5.72	891.3	0.68	5	10.52	6.12	63	2	8	11.2	A	IVF	4	0	4	2	2	2	0	否	是	移植	未妊娠
433	1	C00013436	刘俊敬	≥35	40	1	降调节方案	3	425	＞10天	12	＞3000	5100	HCG	3	1	1	继发不孕	3.89	＞24	26	女方因素	6	1.12	862	1.96	6	9.78	6.22	40.37	2	15	13.5	B	IVF	6	0	4	1	2	2	0	否	是	移植	已妊娠	临床妊娠	宫内妊娠	单胎宫内妊娠
438	1	2018030180	刘秋霞	≥35	39	1	降调节方案	3	422.727	＞10天	11	＞3000	4650	HCG	1	2	0	继发不孕	0.93	＞24	29.6	女方因素	6	0.52	472	0.42	1	7.64	5.01	65.42	4	7	0.93	C	IVF	1	0	1	1	1	1	0	否	是	移植	未妊娠
439	1	2016110190	郭璟	≥35	41	2	拮抗剂方案	2	602.273	＞10天	11	＞3000	6625	HCG	5	1	1	继发不孕	0.83	≤24	20.2	混合因素	6	1.52	1784	1.43	4	9.7	3.83	93.36	4	5	8.9	A	ICSI	4	0	2	1	2	2	0	否	是	移植	未妊娠
442	1	2018060233	王立静	≥35	44	1	刺激方案	1	300	≤10天	9	≤3000	2700	HCG	2	4	1	继发不孕	1.94	＞24	26.4	混合因素	6	8.36	1848	1.56	4	8.4	3.25	59.09	2	10	6.9	A-B	ICSI	2	0	2	0	0	0	0	否	否	全胚冷冻
443	1	2017050099	王晓峰	≥35	42	1	降调节方案	3	350	≤10天	8	≤3000	2800	HCG	2	3	2	继发不孕	0.47	≤24	22.6	女方因素	6	8.22	1846.72	1.08	5	10.5	4.39	78	4	4	16.9	A-B	IVF	5	0	2	1	0	0	0	否	否	全胚冷冻
445	1	C00005698	杜文慧	＜35	29	2	降调节方案	3	431.25	＞10天	12	＞3000	5175	HCG	6	0	0	原发不孕	1.77	＞24	25.4	女方因素	6	1.04	1835	0.68	7	5.28	6.28	32.81	1	18	12.1	A	IVF	4	0	2	0	2	2	0	否	是	移植	已妊娠	临床妊娠	宫内妊娠	单胎宫内妊娠
446	1	C00014606	王洪丽	≥35	36	1	刺激方案	1	300	≤10天	7	≤3000	2100	HCG	8	1	0	继发不孕	1.82	≤24	20	混合因素	6	7.01	1824	1.41	8	6.35	4.9	65	2	11	0.8	B	ICSI	4	0	4	0	0	0	0	否	否	全胚冷冻
447	1	C00014083	张文文	≥35	36	1	降调节方案	3	312.5	＞10天	12	＞3000	3750	HCG	7	2	1	继发不孕	3.87	≤24	19.8	女方因素	6	0.63	1814	1.35	7	6.15	4.09	52	2	15	17.5	A	IVF	6	0	4	1	0	0	0	否	否	全胚冷冻
448	1	C00016733	孔宪玲	≥35	39	4	刺激方案	1	300	≤10天	9	≤3000	2700	HCG	2	1	1	继发不孕	1.80	≤24	23.5	混合因素	6	7.7	1800	1.25	5	9.57	2.74	54	2	10	4.3	B	ICSI	2	0	1	0	0	0	0	否	否	全胚冷冻
449	1	C00010387	孟凡捷	≥35	36	1	刺激方案	1	450	＞10天	12	＞3000	5400	HCG	3	2	1	继发不孕	1.81	＞24	28.8	女方因素	6	3.71	1798	1.2	5	10.16	3.62	18	2	11	0.74	A-B	IVF	4	0	4	0	0	0	0	否	否	全胚冷冻
452	1	C00016712	郭玲玲	＜35	33	2	刺激方案	1	300	≤10天	7	≤3000	2100	HCG	7	0	0	原发不孕	1.87	≤24	22.6	女方因素	6	12.48	1778	1.93	6	9.91	4.49	31	1	9	0.52	B-C	IVF	4	0	2	1	0	0	0	否	否	全胚冷冻
458	1	C00016473	谢琳	≥35	37	1	降调节方案	3	375	＞10天	13	＞3000	4875	HCG	4	0	0	原发不孕	2.75	≤24	17.9	男方因素	6	1	1722	1.33	6	8.77	6.68	65	2	11	14.4	B-C	ICSI	3	0	3	1	2	2	0	否	是	移植	已妊娠	临床妊娠	宫内妊娠	单胚胎停
460	1	C00016738	王静	≥35	39	4	刺激方案	1	300	＞10天	17	＞3000	5100	HCG	4	2	1	继发不孕	2.03	≤24	20.2	混合因素	6	13.4	1684	1.77	5	10.1	2.5	36	2	8	0.78	A	ICSI	5	0	2	0	0	0	0	否	否	全胚冷冻
461	1	2018030223	翟新菊	≥35	38	2	降调节方案	3	465	＞10天	15	＞3000	6975	HCG	2	3	1	继发不孕	1.77	≤24	22.3	男方因素	6	1.09	1650	0.49	6	7.36	5.77	46.43	2	12	13.8	A	ICSI	5	0	1	0	1	1	0	否	是	移植	未妊娠
463	1	C00015966	李娟	≥35	36	1	降调节方案	3	343.75	＞10天	12	＞3000	4125	HCG	3	1	0	继发不孕	1.26	≤24	22.3	女方因素	6	1.89	1648	1.38	7	6.89	4.58	59	2	14	10.5	C	IVF	6	0	4	1	2	2	0	否	是	移植	未妊娠
467	1	2018060118	董云娟	≥35	45	2	刺激方案	1	300	≤10天	9	≤3000	2700	HCG	1	2	0	继发不孕	0.91	≤24	22.6	女方因素	6	9.78	1839	3.39	6	7.9	4.7	89	4	9	7	B	IVF	3	0	1	1	0	0	0	否	否	全胚冷冻
468	1	2017010013	张伟丽	≥35	39	2	降调节方案	3	300	≤10天	8	≤3000	2400	HCG	3	1	1	继发不孕	2.08	≤24	24	混合因素	6	11.02	1835	1.5	6	6.86	5.86	41	2	10	9.1	B	ICSI	2	0	2	0	0	0	0	否	否	全胚冷冻
471	1	2017080054	杨玉男	≥35	37	1	降调节方案	3	313.333	＞10天	15	＞3000	4700	HCG	3	0	0	原发不孕	1.53	≤24	21.7	不明原因	6	1.51	1800	1.45	6	6.94	3.59	41	2	10	11	A-B	IVF	5	0	4	0	0	0	0	否	否	全胚冷冻
473	1	C00010143	范丽红	＜35	34	1	降调节方案	3	432.353	＞10天	17	＞3000	7350	HCG	2	1	1	继发不孕	2.22	＞24	28.5	女方因素	6	2.29	1798	1.05	7	8.68	2.28	43	1	13	12.5	B	IVF	6	0	4	1	2	2	0	否	是	移植	未妊娠
475	1	2017020036	罗锦旻	≥35	41	2	降调节方案	3	458.333	≤10天	9	＞3000	4125	HCG	2	1	0	继发不孕	1.17	≤24	17.2	混合因素	6	1.46	1778	1.64	5	6.62	8.7	40.37	4	6	12	A	ICSI	3	0	0	0	0	0	0	是		无可移植胚胎
476	1	2017060074	韩伟伟	＜35	34	1	降调节方案	3	325	＞10天	12	＞3000	3900	HCG	4	2	0	继发不孕	2.36	＞24	31.9	女方因素	8	2.34	1241	1.23	9	5.78	6.22	40.37	1	18	16.6	A	IVF	8	0	6	0	0	0	0	否	否	全胚冷冻
480	1	2017100003	李涵	＜35	33	2	刺激方案	1	384.375	＞10天	16	＞3000	6150	HCG	6	0	0	原发不孕	1.02	＞24	25.7	女方因素	6	5.84	1724	1.34	1	10.7	4.36	87.09	3	5	10.8	A	IVF	1	0	0	0	0	0	0	是		无可移植胚胎
482	1	2017040144	张立伟	＜35	29	1	刺激方案	1	300	＞10天	11	＞3000	3300	HCG	3	0	0	原发不孕	1.2	≤24	20.7	女方因素	6	1.52	1698	1.48	5	7.91	4.36	50.1	1	8	12.6	A-B	IVF	4	0	2	1	0	0	0	否	否	全胚冷冻
484	1	C00016099	李丹	＜35	33	1	降调节方案	3	337.5	＞10天	14	＞3000	4725	HCG	3	0	0	原发不孕	1.69	≤24	19.5	女方因素	6	0.52	1650	1.51	4	8.67	6.02	43.78	1	11	12.8	A	IVF	4	1	3	1	0	0	0	否	否	全胚冷冻
485	1	C00010132	邱文	≥35	41	2	刺激方案	1	300	≤10天	8	≤3000	2400	HCG	2	5	1	继发不孕	1.5	＞24	28.7	女方因素	6	5.84	1648	1.29	3	7.09	5.42	41	2	8	1.16	A-B	IVF	1	0	1	1	0	0	0	否	否	全胚冷冻
491	1	2016050229	马征	＜35	34	1	刺激方案	1	350	＞10天	15	＞3000	5250	HCG	5	0	0	原发不孕	2.47	≤24	20.9	女方因素	6	1.45	2563	0.87	8	6.2	5.35	47.7	1	9	10.8	B	IVF	0	0	0	0	0	0	0	是		未受精
492	1	C00006406	刘文华	≥35	41	3	刺激方案	1	368.182	＞10天	11	＞3000	4050	HCG	12	0	0	原发不孕	1.41	＞24	24.2	女方因素	6	7.84	2552	1.39	6	4.87	4.03	76.43	2	9	0.9	A-B	IVF	5	0	2	0	0	0	0	否	否	全胚冷冻
496	1	C00010819	宁存霞	≥35	45	2	刺激方案	1	450	＞10天	11	＞3000	4950	HCG	7	3	1	继发不孕	1.33	＞24	28.8	女方因素	6	3.85	2511	1.09	6	16.85	6.03	10	2	12	0.51	A-B	IVF	4	0	1	0	0	0	0	否	否	全胚冷冻
498	1	C00010759	季廷芳	≥35	44	1	刺激方案	1	300	≤10天	9	≤3000	2700	HCG	2	3	1	继发不孕	2.83	≤24	23	女方因素	6	7.1	2497	0.97	5	11.76	4.87	29.8	2	9	0.41	A-B	IVF	3	0	3	3	0	0	0	否	否	全胚冷冻
501	1	C00008718	张君	≥35	38	1	拮抗剂方案	2	300	＞10天	12	＞3000	3600	双扳机	2	3	1	继发不孕	2.66	≤24	22.1	女方因素	6	1.56	2476	1.88	5	8.91	4.56	24.76	2	9	10.6	A	IVF	4	0	4	3	0	0	0	否	否	全胚冷冻
506	1	C00011785	孙淼	≥35	37	3	刺激方案	1	375	≤10天	10	＞3000	3750	HCG	3	1	0	原发不孕	1.24	≤24	20.3	女方因素	6	8.73	2422	0.6	3	9.69	4.43	47	2	8	7.6	B	IVF	3	0	2	0	0	0	0	否	否	全胚冷冻
508	1	2016080084	孟丛丛	＜35	29	2	刺激方案	1	420	≤10天	10	＞3000	4200	HCG	3	0	0	原发不孕	1.33	≤24	22.5	女方因素	6	1.64	2381	1.26	9	7.53	5.39	80.74	1	10	12.9	A	IVF	6	0	2	1	2	2	0	否	是	移植	已妊娠	临床妊娠	宫内妊娠	单胚胎停
509	1	2017060012	宫晓娜	≥35	40	1	拮抗剂方案	2	291.667	≤10天	9	≤3000	2625	HCG	2	3	1	继发不孕	2.05	≤24	21.1	女方因素	6	2.12	2375	0.64	7	9.09	5.37	41	2	11	12.6	A	IVF	3	0	2	2	2	2	0	否	是	移植	未妊娠
510	1	2017040139	赵宝军	≥35	41	2	刺激方案	1	375	≤10天	9	＞3000	3375	HCG	4	1	1	继发不孕	1.45	≤24	23.3	混合因素	6	3.59	2369	0.57	9	10.42	3.74	40	2	9	13.4	B	ICSI	2	0	1	0	1	1	0	否	是	移植	未妊娠
514	1	C00008726	仪美娟	≥35	38	3	降调节方案	3	351.923	＞10天	13	＞3000	4575	HCG	3	3	1	继发不孕	2.79	＞24	24.2	混合因素	6	1.46	2300	0.27	8	6.19	5.93	40	2	12	12.2	B-C	ICSI	5	0	4	2	2	2	0	否	是	移植	已妊娠	临床妊娠	宫内妊娠	双胎宫内妊娠
520	1	C00007176	武广梅	≥35	47	1	刺激方案	1	375	＞10天	12	＞3000	4500	HCG	5	2	1	继发不孕	0.88	＞24	25.4	女方因素	6	25.42	2235	2.23	4	12.84	3.32	21	4	7	0.45	B	IVF	1	0	1	0	0	0	0	否	否	全胚冷冻
525	1	C00012712	栗杨杨	≥35	35	1	刺激方案	1	375	≤10天	9	＞3000	3375	HCG	4	2	1	继发不孕	2.56	≤24	19.6	女方因素	7	4.24	2070	0.6	8	11.97	7.45	37	2	14	1.63	B	IVF	8	0	6	3	2	2	0	否	是	移植	已妊娠	临床妊娠	宫内妊娠	单胎宫内妊娠
530	1	2018050058	于聪灵	≥35	40	1	刺激方案	1	415.909	＞10天	11	＞3000	4575	HCG	2	2	1	继发不孕	1.95	＞24	24.4	不明原因	6	9.28	2129	2.01	4	7.32	3.15	45.76	2	9	5.8	A	IVF	3	0	1	0	0	0	0	否	否	全胚冷冻
536	1	2016090195	李因美	＜35	26	1	降调节方案	3	293.75	＞10天	12	＞3000	3525	HCG	2	3	1	原发不孕	2.67	＞24	27	女方因素	6	0.66	2055	1.41	7	9.89	9.93	25.93	1	26	16.4	B	IVF	6	0	2	0	0	0	0	否	否	全胚冷冻
537	1	C00009834	刘敏	＜35	28	3	刺激方案	1	450	≤10天	10	＞3000	4500	HCG	1	1	0	继发不孕	2.27	＞24	24.2	女方因素	6	6.88	2049	1.28	5	4.02	2.87	43.67	1	10	5.1	A-B	IVF	5	0	3	0	0	0	0	否	否	全胚冷冻
540	1	2017060108	程宪菊	≥35	42	1	刺激方案	1	333.333	≤10天	9	≤3000	3000	HCG	2	1	1	继发不孕	1.7	≤24	21.9	女方因素	6	7.81	2038	1.9	5	7.5	4.1	23.18	2	9	8.1	A	IVF	3	0	1	1	0	0	0	否	否	全胚冷冻
541	1	C00019393	刘兆凤	≥35	35	1	拮抗剂方案	2	300	≤10天	8	≤3000	2400	HCG	6	4	0	继发不孕	1.43	≤24	20.7	女方因素	6	1.53	2035.18	2.43	4	7.68	4.72	32.32	2	11	9.2	A-B	IVF	4	1	4	1	0	0	0	否	否	全胚冷冻
544	1	C00008903	宫晓丽	＜35	30	2	降调节方案	3	375	＞10天	13	＞3000	4875	HCG	1	2	0	继发不孕	2.47	≤24	21.8	女方因素	6	2.47	1998	0.34	6	13.64	2.83	37	1	9	8.7	A-B	IVF	4	0	4	2	0	0	0	否	否	全胚冷冻
546	1	2016120206	周长荣	≥35	37	1	刺激方案	1	337.5	＞10天	16	＞3000	5400	HCG	4	0	0	原发不孕	2.27	＞24	24.7	女方因素	6	4.28	1985	1.41	7	10.37	4.51	50.6	2	11	14.5	B	IVF	4	0	2	0	0	0	0	否	否	全胚冷冻
550	1	C00018554	刘霞	≥35	39	1	刺激方案	1	450	≤10天	10	＞3000	4500	HCG	10	1	1	继发不孕	1.41	＞24	24.2	女方因素	6	9.33	1899.12	1.07	4	8.68	6.98	15.65	2	9	9.2	A	IVF	2	0	2	0	0	0	0	否	否	全胚冷冻
554	1	C00015845	赵艳霞	≥35	39	1	降调节方案	3	384.091	＞10天	11	＞3000	4225	HCG	1	3	1	继发不孕	1.72	≤24	20.1	男方因素	6	0.63	1876	1.04	5	5.95	6.93	19	2	14	16.2	A-B	ICSI	5	0	2	1	2	2	0	否	是	移植	未妊娠
556	1	2018030242	党玉霞	≥35	42	1	刺激方案	1	345	≤10天	10	＞3000	3450	HCG	5	0	0	原发不孕	2.27	≤24	22.3	男方因素	6	14.96	1856	2.18	6	12.34	4.35	60	2	10	7	A	ICSI	3	0	2	1	0	0	0	否	否	全胚冷冻
558	1	2016060237	高巍	≥35	36	2	降调节方案	3	427.5	≤10天	10	＞3000	4275	HCG	1	0	0	原发不孕	2.59	≤24	20.4	不明原因	6	0.8	1848	1.17	6	3.03	5.97	46.43	2	16	6.8	B	ICSI	5	0	4	1	0	0	0	否	否	全胚冷冻
559	1	C00017488	王颖	≥35	42	1	拮抗剂方案	2	317.5	≤10天	10	＞3000	3175	HCG	3	1	1	原发不孕	1.69	≤24	20.3	女方因素	6	1.35	1846.72	1.64	6	9.05	6.13	43	2	9	9.7	A-B	IVF	4	0	2	0	2	2	0	否	是	移植	未妊娠
560	1	2016040048	满英姿	≥35	42	1	降调节方案	3	300	＞10天	11	＞3000	3300	HCG	2	3	1	继发不孕	0.64	≤24	21.6	混合因素	6	10.53	1839	1.39	4	13.3	4.24	41.3	4	6	10.5	B	ICSI	3	0	2	1	2	2	0	否	是	移植	未妊娠
562	1	C00011626	王丽	≥35	46	3	降调节方案	3	343.75	＞10天	12	＞3000	4125	HCG	1	1	1	继发不孕	1.25	≤24	24	女方因素	6	2.66	1824	1.32	5	10.71	6.58	37.78	2	13	1.12	A-B	IVF	5	0	4	0	2	2	0	否	是	移植	已妊娠	临床妊娠	宫内妊娠	单胚胎停
564	1	2017040097	朱静	＜35	28	1	刺激方案	1	403.125	＞10天	16	＞3000	6450	HCG	2	0	0	原发不孕	3.92	＞24	28.7	女方因素	6	3.23	1800	1.25	7	11.19	8.9	70	1	13	8.5	B	IVF	3	0	1	0	0	0	0	否	否	全胚冷冻
566	1	2016080120	李秀梅	≥35	41	3	刺激方案	1	300	≤10天	7	≤3000	2100	HCG	1	4	1	继发不孕	1.7	＞24	26	混合因素	6	1.28	1798	0.91	4	9.56	2.59	39	2	8	7.2	B	ICSI	4	0	3	1	0	0	0	否	否	全胚冷冻
567	1	C00012087	张雪	＜35	31	1	拮抗剂方案	2	300	≤10天	9	≤3000	2700	HCG	4	0	0	原发不孕	5.43	≤24	18.4	女方因素	6	4.55	1791	0.92	8	11.34	6.61	33	1	20	1.17	A	IVF	3	1	4	0	2	2	0	否	是	移植	未妊娠
570	1	2017060060	李相峰	≥35	39	1	降调节方案	3	311.538	＞10天	13	＞3000	4050	HCG	3	2	1	原发不孕	1.33	≤24	20.5	女方因素	6	1.22	1761	1.04	5	4.77	3.01	55.05	2	11	14.1	A-B	IVF	2	0	2	1	0	0	0	否	否	全胚冷冻
572	1	C00010466	李亚丽	≥35	46	1	刺激方案	1	300	≤10天	8	≤3000	2400	HCG	7	4	2	继发不孕	0.74	≤24	22	女方因素	6	7.6	1724	1.24	6	8.11	3.99	42	4	11	0.5	A	IVF	5	0	2	0	0	0	0	否	否	全胚冷冻
573	1	C00015477	马成丰	≥35	43	2	刺激方案	1	300	≤10天	10	≤3000	3000	HCG	4	1	1	继发不孕	1.53	＞24	26.2	女方因素	6	2.94	1724	0.56	6	13.45	4.22	14	2	9	11.8	A	IVF	2	0	2	0	2	2	0	否	是	移植	未妊娠
574	1	2018070002	王兆霞	≥35	39	2	刺激方案	1	450	≤10天	9	＞3000	4050	HCG	3	2	1	继发不孕	1.2	＞24	37.3	女方因素	6	4.91	1722	0.66	2	7.49	3.15	80.6	2	9	6.2	B-C	IVF	1	0	0	0	0	0	0	是		无可移植胚胎
576	1	2016110237	刘海燕	＜35	33	3	刺激方案	1	375	≤10天	9	＞3000	3375	HCG	4	0	0	原发不孕	1.40	＞24	29.3	女方因素	6	1.04	1684	0.91	7	6.45	5.34	51.38	1	8	12	A	IVF	0	0	0	0	0	0	0	是		未受精
580	1	2016070065	孙合春	≥35	37	3	刺激方案	1	300	＞10天	15	＞3000	4500	HCG	12	0	0	原发不孕	2.04	＞24	29	混合因素	6	0.6	1636	0.5	8	7.34	2.92	69.73	2	8	8.7	A	ICSI	4	0	2	0	0	0	0	否	否	全胚冷冻
587	1	C00019022	王姝	≥35	38	1	拮抗剂方案	2	362.5	≤10天	8	≤3000	2900	HCG	2	2	0	继发不孕	1.29	＞24	24.5	女方因素	6	2.26	1594.82	1.42	7	6.08	2.76	40.2	2	10	7.5	A	IVF	7	0	3	1	1	1	0	否	是	移植	未妊娠
589	1	C00018127	陈娟	≥35	36	2	拮抗剂方案	2	375	≤10天	9	＞3000	3375	HCG	4	0	0	原发不孕	1.51	≤24	20.2	男方因素	6	2.58	1581.78	0.67	4	7.14	5.12	79	2	11	13	A-B	ICSI	2	0	0	0	0	0	0	是		无可移植胚胎
596	1	2018040206	邹丽艳	≥35	35	1	降调节方案	3	390.909	＞10天	11	＞3000	4300	HCG	5	0	0	原发不孕	5.23	≤24	21.3	女方因素	6	1.62	1539	0.58	7	6.4	4.33	27.19	2	12	10.8	A-B	IVF	5	0	1	0	0	0	0	否	否	全胚冷冻
598	1	2017080099	杨晓妮	≥35	38	1	降调节方案	3	310.714	＞10天	14	＞3000	4350	HCG	1	2	1	继发不孕	1.91	＞24	25.4	女方因素	6	3.29	1528	0.84	8	8.17	8.05	64.74	2	14	10.5	A-B	IVF	3	0	3	0	0	0	0	否	否	全胚冷冻
604	1	2018050216	孟令华	＜35	32	2	刺激方案	1	337.5	≤10天	10	＞3000	3375	HCG	1	3	1	继发不孕	1.95	≤24	21.7	不明原因	6	10.87	1465	1.1	4	8.45	3.81	56.76	1	11	6.8	B	IVF	3	0	2	0	0	0	0	否	否	全胚冷冻
605	1	2017030282	彭华	≥35	39	3	刺激方案	1	320.455	＞10天	11	＞3000	3525	HCG	1	4	1	继发不孕	1.77	≤24	21.2	混合因素	6	1.72	1464	0.78	4	8.66	4.56	55	2	12	9	A	ICSI	3	0	2	0	2	2	0	否	是	移植	已妊娠	临床妊娠	宫内妊娠	单胎宫内妊娠
613	1	C00018744	尚晓丽	≥35	42	2	刺激方案	1	325	≤10天	10	＞3000	3250	HCG	2	1	0	继发不孕	2.8	＞24	24.5	男方因素	6	1.98	1351.1	0.99	6	5.34	3.95	49.77	2	11	13	B	ICSI	5	1	3	1	0	0	0	否	否	全胚冷冻
617	1	C00016186	刘文茹	＜35	28	4	刺激方案	1	300	≤10天	6	≤3000	1800	HCG	2	0	0	原发不孕	1.82	＞24	26.7	女方因素	6	7.53	1322	0.76	4	7.58	2.76	27	1	10	0.9	B-	IVF	4	0	2	0	0	0	0	否	否	全胚冷冻
622	1	2017020149	蔡琳	≥35	40	1	降调节方案	3	383.333	≤10天	9	＞3000	3450	HCG	1	1	0	继发不孕	1.6	＞24	26	混合因素	6	2.21	1276	2.14	8	3.23	2.66	66.06	2	14	11.7		ICSI	3	0	4	0	2	2	0	否	是	移植	未妊娠
624	1	C00012219	叶丽杰	≥35	38	3	拮抗剂方案	2	342.857	≤10天	7	≤3000	2400	HCG	8	0	0	原发不孕	1.88	＞24	24.3	混合因素	6	4.85	1268	0.65	5	8.52	5.33	40.8	2	11	0.68	A	ICSI	5	0	4	0	0	0	0	否	否	全胚冷冻
626	1	2016030158	井绪花	＜35	29	1	降调节方案	3	323.077	＞10天	13	＞3000	4200	HCG	2	1	0	继发不孕	1.4	＞24	35.8	女方因素	6	0.81	1161	0.56	5	9.24	6.68	45	1	28	15	B	IVF	3	0	3	2	2	2	0	否	是	移植	未妊娠
629	1	2018030116	鲁云霞	≥35	35	2	刺激方案	1	300	≤10天	10	≤3000	3000	HCG	6	0	0	原发不孕	1.89	＞24	26	男方因素	6	10.44	1105	1.6	7	9.36	5.79	49.09	2	15	7.2	B	ICSI	1	0	0	0	0	0	0	是		无可移植胚胎
636	1	2017100111	崔静丹	≥35	37	1	降调节方案	3	301.923	＞10天	13	＞3000	3925	HCG	1	4	3	继发不孕	2.03	≤24	21.5	男方因素	6	0.62	1268	1.1	5	8.23	3.84	36.43	2	11	#NULL!		IVF	3	0	2	0	2	2	0	否	是	移植	未妊娠
638	1	2016030282	孙丽朋	＜35	34	5	降调节方案	3	354.545	＞10天	11	＞3000	3900	HCG	5	1	1	原发不孕	1.48	≤24	23.5	男方因素	6	2.47	1184	0.75	7	9.51	5.83	69.73	1	12	8.7	B	ICSI	5	0	4	4	0	0	0	否	否	全胚冷冻
642	1	C00005363	张玮	＜35	33	1	拮抗剂方案	2	363.889	≤10天	9	＞3000	3275	HCG	6	0	0	原发不孕	1.98	＞24	30.1	女方因素	5	3.9	942	0.77	5	10.42	3.57	35	1	11	9.4	A	IVF	1	1	2	0	1	1	0	否	是	移植	已妊娠	临床妊娠	宫内妊娠	单胎宫内妊娠
648	1	2016070217	刘玉玲	≥35	38	1	刺激方案	1	323.077	＞10天	13	＞3000	4200	HCG	2	2	1	继发不孕	2.48	＞24	24.7	混合因素	5	0.54	860	1.08	4	12.9	2.9	40.37	2	8	12	A	ICSI	2	0	2	0	2	2	0	否	是	移植	未妊娠
650	1	2016050077	杨震	≥35	39	1	刺激方案	1	345	≤10天	10	＞3000	3450	HCG	1	3	1	继发不孕	1.31	＞24	27.3	女方因素	5	2.55	774	0.25	2	4.32	3.51	32.32	2	11	10.9	A-B	IVF	2	0	2	0	0	0	0	否	否	全胚冷冻
652	1	C00012317	杜蕾蕾	＜35	29	2	降调节方案	3	412.5	≤10天	10	＞3000	4125	HCG	6	0	0	原发不孕	2.54	≤24	16.8	混合因素	5	1.32	753	1.06	4	10.95	4	48	1	7	1.24	A	ICSI	1	0	1	1	1	1	0	否	是	移植	未妊娠
654	1	2016050149	李亚霜	≥35	43	4	刺激方案	1	412.5	＞10天	12	＞3000	4950	HCG	5	4	1	继发不孕	0.39	≤24	22	女方因素	5	1.33	718	0.62	2	16.3	4.56	69.63	4	4	13.7	B	IVF	1	0	1	0	0	0	0	否	否	全胚冷冻
656	1	2018040082	许福霞	≥35	41	2	刺激方案	1	415.909	＞10天	11	＞3000	4575	HCG	3	1	0	继发不孕	1.12	≤24	23.1	女方因素	5	1.88	676	2.02	2	14.83	6.56	46.23	4	6	8.5	A-B	IVF	1	0	1	0	0	0	0	否	否	全胚冷冻
657	1	2017070205	陈天红	＜35	30	1	降调节方案	3	294.231	＞10天	13	＞3000	3825	HCG	5	0	0	原发不孕	3.08	≤24	17.2	混合因素	5	1.94	1559	1.05	6	11.27	3.98	48	1	13	9.2	A	ICSI	5	0	4	2	2	2	0	否	是	移植	未妊娠
664	1	C00011277	牛华	≥35	37	2	刺激方案	1	300	≤10天	8	≤3000	2400	HCG	3	2	1	继发不孕	0.91	≤24	18.6	女方因素	5	11.34	1631	1.03	4	9	4.73	61.1	4	7	4.2	B	IVF	2	0	2	1	0	0	0	否	否	全胚冷冻
669	1	C00011299	李珊珊	＜35	34	1	刺激方案	1	300	≤10天	7	≤3000	2100	HCG	6	1	0	继发不孕	1.52	≤24	17.1	女方因素	5	25.58	1401	2.09	4	8.76	8.22	42	1	12	5.2	B	IVF	1	0	1	0	0	0	0	否	否	全胚冷冻
672	1	C00011786	毕志娜	＜35	33	1	刺激方案	1	300	≤10天	9	≤3000	2700	HCG	3	2	0	继发不孕	1.5	≤24	20.8	女方因素	5	13.67	1877	1.2	5	10.73	5.05	42	1	10	0.65	B	IVF	5	0	4	1	0	0	0	否	否	全胚冷冻
673	1	2017030197	许祎	≥35	38	2	降调节方案	3	425	≤10天	9	＞3000	3825	HCG	8	0	0	原发不孕	1.51	＞24	25	女方因素	5	7.18	1875	0.64	0	10.29	5.35	29.6	2	5	10.5	A		0	0	0	0	0	0	0	是		未取到卵
676	1	2017060283	徐凡一	≥35	40	1	刺激方案	1	300	≤10天	9	≤3000	2700	HCG	1	2	1	继发不孕	1.2	≤24	23	女方因素	5	1.47	1838	1.01	4	6.03	3.53	80	2	7	10.3	B	IVF	4	0	2	1	0	0	0	否	否	全胚冷冻
677	1	C00012538	赵丽	＜35	34	2	刺激方案	1	300	≤10天	7	≤3000	2100	HCG	3	0	0	原发不孕	1.26	≤24	21.5	男方因素	5	21.51	1836	1.59	3	6.83	7.15	73	1	7	0.78	A	IVF	0	0	0	0	0	0	0	是		无可移植胚胎
681	1	C00010323	贾鹏	≥35	42	1	降调节方案	3	382.5	≤10天	10	＞3000	3825	HCG	2	2	0	继发不孕	1.32	≤24	21.6	女方因素	5	2.69	1806	1.24	6	4.51	3.23	40.32	2	14	13	B	IVF	6	0	4	2	2	2	0	否	是	移植	未妊娠
682	1	C00004401	陈学会	≥35	42	2	拮抗剂方案	2	385.227	＞10天	11	＞3000	4237.5	双扳机	1	3	1	继发不孕	1.83	≤24	22.6	女方因素	5	5.46	1804	1.25	6	9.12	4.28	32	2	15	10	A	IVF	3	0	3	2	2	2	0	否	是	移植	未妊娠
685	1	2018070014	刘晓凤	＜35	27	4	刺激方案	1	330	≤10天	10	＞3000	3300	HCG	1	1	0	继发不孕	1.390	＞24	39	男方因素	5	2.1	1790	1.22	4	6.47	5.52	17	1	10	7.1	A	ICSI	2	0	2	2	0	0	0	否	否	全胚冷冻
686	1	2017020034	王蕊	≥35	42	1	降调节方案	3	300	≤10天	9	≤3000	2700	HCG	1	2	1	继发不孕	1.12	≤24	23.4	女方因素	5	3.45	1786	1.7	5	9.58	2.86	69.73	4	6	10.8	A	IVF	3	0	1	0	1	1	0	否	是	移植	未妊娠
689	1	C00018167	李冬雪	＜35	29	2	刺激方案	1	300	≤10天	8	≤3000	2400	HCG	2	0	0	原发不孕	2.33	≤24	21.5	男方因素	5	10.54	1771	2.47	6	7.6	5.1	46.98	1	15	0.64	A	ICSI	3	0	2	0	0	0	0	否	否	全胚冷冻
693	1	C00006220	邹琳	＜35	33	6	刺激方案	1	429.545	＞10天	11	＞3000	4725	HCG	1	2	0	继发不孕	1.56	≤24	23.8	女方因素	5	8.22	1752	1.24	4	7.8	7.54	76.43	1	7	0.6	A-B	IVF	2	0	1	0	0	0	0	否	否	全胚冷冻
700	1	2016050233	王吉焕	≥35	35	1	降调节方案	3	351.786	＞10天	14	＞3000	4925	HCG	2	0	0	原发不孕	2.68	≤24	21.3	不明原因	5	1.2	1687	1.08	8	7.31	3.06	34	2	12	12	A	IVF	6	0	2	0	2	2	0	否	是	移植	未妊娠
701	1	C00012239	陈雪	＜35	34	1	拮抗剂方案	2	362.5	≤10天	8	≤3000	2900	HCG	2	1	0	继发不孕	1.61	≤24	23.7	女方因素	5	6.59	1684	0.97	6	8	5.17	32	1	9	12.3	A	IVF	1	0	1	0	1	1	0	否	是	移植	已妊娠	临床妊娠	宫内妊娠	单胎宫内妊娠
704	1	2016110210	刘秀芳	≥35	44	1	降调节方案	3	443.75	≤10天	8	＞3000	3550	HCG	1	3	1	继发不孕	0.48	≤24	22	女方因素	5	5.97	1669	0.78	7	9.01	5.19	45	4	8	19.1	A-B	IVF	4	0	2	0	0	0	0	否	否	全胚冷冻
707	1	2016080086	陈雪唤	＜35	34	1	刺激方案	1	300	≤10天	8	≤3000	2400	HCG	5	1	1	继发不孕	1.83	≤24	22.4	女方因素	5	5.8	1661	0.79	4	9.81	9.85	53	1	6	5.4	B	IVF	4	0	2	0	0	0	0	否	否	全胚冷冻
709	1	C00015900	王凤霞	≥35	36	4	刺激方案	1	300	≤10天	8	≤3000	2400	HCG	7	0	0	原发不孕	1.26	≤24	21	女方因素	5	23.59	1645	0.93	4	13.21	5.76	29	2	6	0.48	A-B	IVF	2	0	2	0	0	0	0	否	否	全胚冷冻
711	1	C00016523	陈景花	≥35	39	1	拮抗剂方案	2	309.375	≤10天	8	≤3000	2475	HCG	2	2	1	继发不孕	0.48	≤24	20.6	女方因素	5	8.63	1631.13	0.28	4	5.76	5.74	83.57	4	6	13	A	IVF	2	0	2	1	2	2	0	否	是	移植	已妊娠	临床妊娠	宫内妊娠	单胎宫内妊娠
712	1	2017090266	李珊珊	＜35	28	1	降调节方案	3	294.318	＞10天	11	＞3000	3237.5	HCG	10	0	0	原发不孕	0.89	＞24	26	女方因素	5	3.31	1624	0.94	4	6.81	2.09	22	3	6	16	A-B	IVF	1	0	1	0	1	1	0	否	是	移植	未妊娠
713	1	C00010122	李永艳	≥35	39	1	拮抗剂方案	2	375	≤10天	7	≤3000	2625	HCG	6	0	0	继发不孕	1.92	＞24	27.6	男方因素	5	5.56	1622	1.16	8	7.39	5.9	28	2	15	9.2	A	IVF	4	0	2	1	2	2	0	否	是	移植	未妊娠
717	1	2016090213	毕海段	≥35	36	2	刺激方案	1	300	＞10天	11	＞3000	3300	HCG	1	3	1	继发不孕	1.33	≤24	22.5	女方因素	5	0.4	1600	1.16	6	7.31	2.29	34.76	2	8	9	B	IVF	5	0	2	1	2	2	0	否	是	移植	未妊娠
725	1	C00007295	牛春霞	≥35	41	1	拮抗剂方案	2	391.667	≤10天	9	＞3000	3525	HCG	3	0	0	继发不孕	2.4	≤24	21.5	女方因素	5	7.56	1548	0.99	5	8.18	7.4	36	2	14	15.1	B	IVF	2	0	0	2	0	0	0	否	否	全胚冷冻
728	1	C00016216	马杰	≥35	40	1	降调节方案	3	300	＞10天	11	＞3000	3300	HCG	1	4	1	继发不孕	1.58	＞24	25	女方因素	5	1.22	1528	0.55	5	8.68	2.55	57	2	10	18.4	B	IVF	4	0	0	0	0	0	0	是		无可移植胚胎
731	1	C00009499	杨春荣	≥35	42	2	刺激方案	1	450	＞10天	12	＞3000	5400	HCG	3	1	1	继发不孕	0.55	≤24	23	女方因素	5	8.43	1503	0.58	4	12.08	4.74	69	4	7	0.97	A	IVF	2	0	2	0	0	0	0	否	否	全胚冷冻
736	1	C00003412	曾凡华	≥35	39	1	降调节方案	3	300	＞10天	11	＞3000	3300	HCG	1	3	1	继发不孕	1.42	≤24	23.2	女方因素	5	1.66	1469	0.51	8	8.05	3.69	44	2	13	11.8	A-B	IVF	1	0	1	0	1	1	0	否	是	移植	未妊娠
738	1	C00005860	李芳	≥35	36	2	拮抗剂方案	2	433.333	≤10天	9	＞3000	3900	HCG	3	2	0	继发不孕	1.49	≤24	19.4	男方因素	5	7.88	1455	1.2	3	8.73	3.32	55	2	8	11.8	A	ICSI	3	0	1	0	0	0	0	否	否	全胚冷冻
742	1	2016090220	刘双	≥35	38	2	刺激方案	1	402.273	＞10天	11	＞3000	4425	HCG	1	1	1	原发不孕	2.37	≤24	21.2	女方因素	5	1.95	1437	1.53	9	6.69	4.2	46.43	2	10	11	B	IVF	6	0	4	3	0	0	0	否	否	全胚冷冻
745	1	2016040203	王霞	＜35	34	1	刺激方案	1	300	≤10天	9	≤3000	2700	HCG	3	1	1	继发不孕	2.17	＞24	25.2	不明原因	5	1.76	1422	0.93	7	5.36	2.28	78	1	13	16	B	IVF	5	0	2	0	2	2	0	否	是	移植	已妊娠	临床妊娠	宫内妊娠	单胎宫内妊娠
746	1	C00011886	陈普杰	＜35	34	1	拮抗剂方案	2	343.75	＞10天	12	＞3000	4125	HCG	4	1	1	继发不孕	1.32	≤24	20	女方因素	5	3.69	1418	1.08	4	9.31	5.19	26	1	6	0.78	A	IVF	2	0	2	0	2	2	0	否	是	移植	未妊娠
747	1	C00011845	赵丽	＜35	34	1	刺激方案	1	300	≤10天	7	≤3000	2100	HCG	3	0	0	原发不孕	1.22	≤24	21.5	男方因素	5	19.71	1416	0.88	2	6.83	7.15	73	1	7	0.8	C	IVF	0	0	0	0	0	0	0	是		未受精
750	1	C00018580	张秋梅	≥35	42	2	刺激方案	1	427.273	＞10天	11	＞3000	4700	HCG	3	2	1	继发不孕	0.49	＞24	25	男方因素	5	6.38	1401	0.47	5	12.09	4.94	19.55	4	7	5	A	ICSI	1	0	1	0	0	0	0	否	否	全胚冷冻
752	1	2016020096	孟丛丛	＜35	28	1	降调节方案	3	356.25	＞10天	12	＞3000	4275	HCG	3	0	0	原发不孕	1.84	≤24	22.5	女方因素	5	1.05	1375	1.55	3	7.53	5.39	80.74	1	9	12.3	A	IVF	2	0	2	0	2	2	0	否	是	移植	未妊娠
753	1	C00017437	董丽燕	≥35	39	1	刺激方案	1	450	≤10天	7	＞3000	3150	双扳机	3	5	1	继发不孕	1.88	＞24	26.4	女方因素	5	6.01	1371	0.91	4	8.95	3.62	10.81	2	9	0.7	B-C	IVF	4	1	1	1	0	0	0	否	否	全胚冷冻
755	1	C00012570	邵会会	≥35	37	1	拮抗剂方案	2	340.385	＞10天	13	＞3000	4425	HCG	3	2	1	继发不孕	2.86	＞24	25.2	女方因素	5	3.25	1363	1.29	6	11.18	5.1	39	2	12	11.8	A	IVF	4	0	4	4	2	2	0	否	是	移植	已妊娠	临床妊娠	宫内妊娠	单胚胎停
756	1	2017090026	牌树珍	≥35	36	1	刺激方案	1	375	＞10天	11	＞3000	4125	HCG	3	0	0	继发不孕	2.68	≤24	21.6	混合因素	5	5.85	1362	2.13	5	7.11	3.83	80.1	2	10	6	A	ICSI	1	0	1	0	0	0	0	否	否	全胚冷冻
757	1	C00009058	胥小翠	≥35	35	3	刺激方案	1	375	≤10天	10	＞3000	3750	HCG	4	2	1	继发不孕	2.69	＞24	25	混合因素	5	19.26	1359	1.17	4	8.81	6.35	54	2	10	0.57	A-B	ICSI	2	0	1	0	0	0	0	否	否	全胚冷冻
758	1	2016080189	石美英	≥35	37	1	刺激方案	1	418.75	＞10天	12	＞3000	5025	HCG	1	1	1	继发不孕	1.43	≤24	22.3	女方因素	5	0.58	1346	0.45	6	9.48	3.86	67.09	2	8	8.6	A-B	IVF	3	0	2	0	0	0	0	否	否	全胚冷冻
761	1	2017030226	马红慧	≥35	42	1	降调节方案	3	337.5	≤10天	8	≤3000	2700	HCG	2	0	0	继发不孕	2.46	≤24	22	女方因素	5	2.9	1322	1.22	7	8.56	5.34	40	2	8	9	B	IVF	6	0	4	0	0	0	0	否	否	全胚冷冻
765	1	C00011170	王媛媛	≥35	46	4	降调节方案	3	312.5	＞10天	12	＞3000	3750	HCG	2	3	1	继发不孕	0.49	≤24	23.5	混合因素	5	9.75	1836	1.25	4	10.9	4.82	30	4	9	7.6	A-B	ICSI	1	0	1	0	1	1	0	否	是	移植	未妊娠
767	1	2016030279	尹焕平	≥35	38	4	降调节方案	3	300	≤10天	6	≤3000	1800	HCG	3	1	1	继发不孕	2.18	≤24	19.2	女方因素	5	3.89	1817	0.34	7	8.74	5.99	34.76	2	12	10.6	A	IVF	6	0	2	0	2	2	0	否	是	移植	未妊娠
768	1	C00010356	高琳琳	≥35	36	4	刺激方案	1	330	≤10天	10	＞3000	3300	HCG	4	0	0	原发不孕	1.94	≤24	23.2	女方因素	5	15.33	1813	1.78	3	16.59	5.61	20	2	7	0.75	A-B	IVF	0	0	1	0	0	0	0	否	否	全胚冷冻
779	1	C00011284	王金凤	≥35	39	4	刺激方案	1	294.231	＞10天	13	＞3000	3825	HCG	8	2	1	继发不孕	1.69	＞24	24.4	女方因素	5	11.93	1760	1.62	4	9.59	4.79	40	2	8	5	B	IVF	3	0	2	0	0	0	0	否	否	全胚冷冻
783	1	2016070062	刘春燕	≥35	40	2	降调节方案	3	390	≤10天	10	＞3000	3900	HCG	1	1	1	继发不孕	1.22	≤24	22.9	女方因素	5	0.68	1734	0.72	6	8.45	6.66	45.95	2	14	15	A	IVF	2	0	1	0	1	1	0	否	是	移植	未妊娠
786	1	2017060220	路克英	≥35	47	4	刺激方案	1	300	≤10天	9	≤3000	2700	HCG	1	1	1	继发不孕	0.5	＞24	25.8	女方因素	5	5.04	1702	0.88	5	5.67	3.77	15.08	4	7	9	A	IVF	4	0	2	1	0	0	0	否	否	全胚冷冻
789	1	2017050217	潘芹	≥35	41	2	降调节方案	3	416.667	≤10天	9	＞3000	3750	HCG	1	5	0	继发不孕	1.69	＞24	29	女方因素	5	0.93	1684	0.48	6	9.55	2.89	46	2	8	6.3	A	IVF	3	0	1	0	0	0	0	否	否	全胚冷冻
791	1	2016040303	曹令香	≥35	44	1	降调节方案	3	450	≤10天	10	＞3000	4500	HCG	3	2	1	继发不孕	1.54	≤24	22.8	女方因素	5	2.17	1671	0.83	4	5.85	6.87	40.21	2	20	11.2	B	IVF	3	0	2	1	2	2	0	否	是	移植	未妊娠
792	1	2018040220	张梦琳	＜35	29	1	降调节方案	3	305.769	＞10天	13	＞3000	3975	HCG	2	2	0	继发不孕	1.24	≤24	20.2	不明原因	5	9.02	1669	0.81	3	9.42	5.41	56	1	8	10.1	A	IVF	2	0	1	0	0	0	0	否	否	全胚冷冻
794	1	2017050268	苑克燕	≥35	41	1	降调节方案	3	300	≤10天	10	≤3000	3000	HCG	13	2	0	继发不孕	0.71	≤24	22.3	男方因素	5	2.67	1666	1.15	4	17.05	7.73	77.07	4	6	7	B-C	ICSI	3	0	3	1	0	0	0	否	否	全胚冷冻
796	1	C00019044	辛迪	＜35	33	1	刺激方案	1	450	＞10天	11	＞3000	4950	HCG	2	0	0	原发不孕	2.71	≤24	21	女方因素	5	10.71	1646.47	1.7	5	9.98	6.34	12.43	1	11	12.3	C	IVF	3	0	3	1	0	0	0	否	否	全胚冷冻
797	1	C00012359	董慧敏	＜35	33	2	刺激方案	1	300	≤10天	7	≤3000	2100	HCG	4	2	0	继发不孕	1.44	≤24	20.8	女方因素	5	13.26	1645	1.14	7	6.77	2.92	91.75	1	10	0.67	A	IVF	3	0	2	1	0	0	0	否	否	全胚冷冻
799	1	C00018465	王娟	≥35	42	2	拮抗剂方案	2	328.125	≤10天	8	≤3000	2625	HCG	5	4	2	继发不孕	0.98	≤24	20.7	女方因素	5	4.32	1631.13	0.77	5	9.9	5.86	44	4	6	8.6	A-B	IVF	3	0	0	0	0	0	0	是		无可移植胚胎
801	1	C00015604	蒙延坤	＜35	32	2	降调节方案	3	389.062	＞10天	16	＞3000	6225	HCG	1	4	2	继发不孕	1.51	＞24	24.2	女方因素	5	2.57	1622	1.03	7	10.3	3.47	63	1	10	13.6	A-B	IVF	2	0	2	1	0	0	0	否	否	全胚冷冻
802	1	C00012382	李春彦	≥35	40	1	刺激方案	1	450	≤10天	10	＞3000	4500	HCG	2	4	0	继发不孕	1.58	＞24	24.6	女方因素	5	3.33	1619	0.76	7	6.63	2.65	72	2	12	0.51	B	IVF	2	0	1	0	1	1	0	否	是	移植	未妊娠
804	1	C00008111	刘静	≥35	43	1	降调节方案	3	350	＞10天	12	＞3000	4200	HCG	2	4	1	继发不孕	2.88	＞24	24.2	女方因素	5	0.99	1603	0.28	5	9.9	6.69	28.73	2	9	1	A-B	IVF	3	0	3	1	0	0	0	否	否	全胚冷冻
806	1	C00012180	王慧君	≥35	47	2	拮抗剂方案	2	346.875	≤10天	8	≤3000	2775	HCG	3	1	1	原发不孕	0.16	≤24	24	女方因素	5	6.29	1588	0.55	4	5.32	2.74	77	4	9	0.63	A	IVF	3	0	2	1	0	0	0	否	否	全胚冷冻
807	1	C00012934	吕玉梅	≥35	40	1	拮抗剂方案	2	300	≤10天	7	≤3000	2100	HCG	2	5	1	继发不孕	1.86	＞24	24.9	女方因素	5	7.8	1583	0.79	4	7.19	7.19	51.82	2	8	5.3	A	IVF	1	0	2	0	0	0	0	否	否	全胚冷冻
815	1	2018030238	王爱华	≥35	40	1	刺激方案	1	300	≤10天	10	≤3000	3000	HCG	3	0	0	原发不孕	1.68	≤24	22.3	女方因素	5	10.06	1538	0.45	4	8.24	4.2	51.38	2	8	4.7	A	IVF	1	0	1	0	0	0	0	否	否	全胚冷冻
817	1	C00003286	邹琳	＜35	32	5	刺激方案	1	412.5	≤10天	10	＞3000	4125	HCG	1	2	0	继发不孕	1.2	≤24	23.8	女方因素	5	8.45	1512	0.95	4	7.8	7.54	76.43	1	8	5.1	A-B	IVF	2	0	2	1	0	0	0	否	否	全胚冷冻
818	1	C00014572	张静	≥35	42	1	拮抗剂方案	2	300	≤10天	8	≤3000	2400	HCG	1	6	1	继发不孕	0.5	＞24	24.2	女方因素	5	3.64	1505	0.67	3	19.38	8.55	14.73	4	7	7.4	A-B	IVF	3	0	2	0	2	2	0	否	是	移植	未妊娠
820	1	C00019160	高玉红	≥35	40	1	拮抗剂方案	2	300	＞10天	11	＞3000	3300	双扳机	12	0	0	原发不孕	1.49	≤24	21.5	女方因素	5	1.48	1497.8	2.2	4	9.87	7.69	65.69	2	8	12.5	A-B	IVF	2	0	1	0	0	0	0	否	否	全胚冷冻
821	1	C00018907	殷汝芳	≥35	40	1	刺激方案	1	450	＞10天	11	＞3000	4950	HCG	13	0	0	原发不孕	0.61	≤24	19.8	女方因素	5	10.25	1493.4	1.33	2	11.17	4.54	38.84	4	6	5.6	A	IVF	0	0	0	0	0	0	0	是		无可移植胚胎
824	1	C00017413	王娟	≥35	41	1	拮抗剂方案	2	315	＞10天	15	＞3000	4725	双扳机	5	4	2	继发不孕	1.23	≤24	20.7	女方因素	5	4.14	1469	2.35	3	9.9	5.86	44	2	7	8.7	A	IVF	0	0	0	0	0	0	0	是		无可移植胚胎
825	1	2018070118	薛秀英	≥35	42	2	拮抗剂方案	2	300	≤10天	9	≤3000	2700	HCG	4	6	1	继发不孕	2.55	≤24	21.8	男方因素	5	21.63	1461	1.41	3	9.67	7.23	45.67	2	8	11.5	A	ICSI	1	0	1	0	0	0	0	否	否	全胚冷冻
835	1	2017100037	王兆霞	≥35	38	1	降调节方案	3	300	＞10天	12	＞3000	3600	HCG	3	2	1	继发不孕	2.1	＞24	37.3	女方因素	5	1.26	1416	0.69	1	7.49	3.15	52	2	9	8	B	IVF	1	0	1	0	1	1	0	否	是	移植	未妊娠
841	1	2016030328	陈东曼	≥35	39	3	刺激方案	1	475	≤10天	9	＞3000	4275	HCG	3	2	1	继发不孕	1.44	≤24	23.4	混合因素	5	3.28	1371	0.76	6	6.17	4.75	12	2	8	9.6	A	ICSI	2	0	2	0	2	2	0	否	是	移植	未妊娠
842	1	C00006569	范翔雪	＜35	32	1	降调节方案	3	444.643	＞10天	14	＞3000	6225	HCG	4	0	0	原发不孕	1.72	≤24	19.3	女方因素	5	2.6	1369	0.55	5	8.84	3.71	36	1	12	1.45	B	IVF	2	0	1	0	1	1	0	否	是	移植	未妊娠
845	1	2017100030	韩丽	＜35	34	1	降调节方案	3	339.706	＞10天	17	＞3000	5775	HCG	3	1	1	继发不孕	4.24	＞24	27.9	女方因素	5	1.76	1359	0.86	6	13.42	2.78	17	1	10	10	A	IVF	5	0	1	0	0	0	0	否	否	全胚冷冻
846	1	2016030209	藏忠华	≥35	38	1	刺激方案	1	300	≤10天	9	≤3000	2700	HCG	9	1	0	原发不孕	0.18	＞24	29.3	混合因素	5	11.52	1346	2.38	#NULL!	9.99	3.25	84.98	4	5	11.8	B		0	0	0	0	0	0	0	是		未取卵
847	1	2016080036	王晓乐	＜35	31	1	降调节方案	3	312.5	≤10天	10	＞3000	3125	HCG	3	0	0	原发不孕	2.29	≤24	22.3	女方因素	5	3.05	1343	1.46	3	5.17	4.12	40.63	1	13	14.3	A-B	IVF	1	0	2	0	2	2	0	否	是	移植	未妊娠
848	1	2017060033	陈雪唤	≥35	35	2	刺激方案	1	305.769	＞10天	13	＞3000	3975	HCG	5	1	1	继发不孕	0.5	≤24	22.4	女方因素	5	5.75	1332	1.34	4	9.81	9.85	53	4	6	8.8	A	IVF	3	0	2	0	2	2	0	否	是	移植	未妊娠
851	1	C00011171	李梅梅	≥35	37	2	刺激方案	1	421.875	≤10天	8	＞3000	3375	HCG	1	1	0	继发不孕	1.88	＞24	28.8	女方因素	5	4.47	1300	1.18	7	7.18	2.71	25	2	11	0.92	B	IVF	4	0	4	1	0	0	0	否	否	全胚冷冻
852	1	C00009637	吕军迎	≥35	41	2	刺激方案	1	425	≤10天	7	≤3000	2975	HCG	6	3	1	继发不孕	2.18	≤24	19.5	男方因素	5	15.53	1294	1.69	4	11.68	5.53	23.56	2	12	0.71	A	ICSI	1	0	0	0	0	0	0	是		无可移植胚胎
853	1	2017120018	王婷婷	＜35	32	1	刺激方案	1	300	＞10天	12	＞3000	3600	HCG	1	3	0	继发不孕	1.72	≤24	22.9	女方因素	5	2.69	1294	0.47	2	7.16	4.01	65.69	1	8	10	A-B	IVF	1	0	1	0	0	0	0	否	否	全胚冷冻
857	1	2018050008	冀萌	≥35	35	2	拮抗剂方案	2	317.045	＞10天	11	＞3000	3487.5	HCG	1	0	0	原发不孕	1.89	＞24	24.2	女方因素	5	3.07	1283	1.32	4	11.26	4.21	50	2	7	9.6	A	IVF	2	0	2	1	1	1	0	否	是	移植	未妊娠
862	1	C00010529	廖淑芳	≥35	43	2	刺激方案	1	431.25	＞10天	12	＞3000	5175	HCG	3	1	1	继发不孕	0.26	＞24	30.4	女方因素	5	3.72	1251	0.95	3	6.54	5.09	47	4	8	0.65	B	IVF	2	0	1	1	0	0	0	否	否	全胚冷冻
868	1	C00007558	赵晓彤	＜35	31	1	降调节方案	3	450	≤10天	8	＞3000	3600	HCG	6	0	0	原发不孕	1.29	＞24	33.6	女方因素	5	3.1	1198	0.57	5	5.16	4.66	24	1	11	1.3	B	IVF	1	0	0	0	0	0	0	是		无可移植胚胎
869	1	C00015183	贾慧	≥35	37	2	降调节方案	3	393.75	≤10天	8	＞3000	3150	HCG	2	1	0	继发不孕	2.76	≤24	21.7	女方因素	5	1.64	1194	1.15	8	11.71	6.24	12.5	2	10	11.5	A	IVF	3	0	2	0	2	2	0	否	是	移植	未妊娠
877	1	C00013108	姜桂霞	≥35	44	3	刺激方案	1	300	＞10天	15	＞3000	4500	HCG	2	2	1	继发不孕	0.52	＞24	28.1	女方因素	5	19.09	1166	1.02	1	13.13	3.84	93.36	4	5	0.56	A-B	IVF	0	0	0	0	0	0	0	是		无可移植胚胎
881	1	2018030016	谭啸	≥35	39	2	降调节方案	3	327.273	＞10天	11	＞3000	3600	HCG	7	1	1	继发不孕	1.51	≤24	23.9	不明原因	5	1.52	1148	1.33	6	4.99	5.46	51	2	9	10.9	A	IVF	3	1	3	1	2	2	0	否	是	移植	已妊娠	临床妊娠	宫内妊娠	单胚胎停
882	1	C00017395	宋欣香	≥35	39	1	降调节方案	3	347.222	≤10天	9	＞3000	3125	HCG	1	1	0	继发不孕	2.66	＞24	25.4	女方因素	5	2.69	1126	1.16	5	5.85	2.98	17	2	13	12.6	A	IVF	4	0	1	0	1	1	0	否	是	移植	未妊娠
885	1	C00008219	王媛媛	≥35	45	3	降调节方案	3	328.846	＞10天	13	＞3000	4275	HCG	1	3	1	原发不孕	1.56	≤24	23.5	混合因素	5	1.53	1103	0.31	6	12.29	6.93	49	2	9	8	A	ICSI	3	0	1	0	1	1	0	否	是	移植	未妊娠
892	1	2016120092	屈金杰	≥35	41	1	刺激方案	1	347.727	＞10天	11	＞3000	3825	HCG	5	3	2	继发不孕	0.19	＞24	24.3	女方因素	5	3.39	1060	1.09	4	12.66	3.38	40	4	5	12.3	A	IVF	4	0	2	1	2	2	0	否	是	移植	未妊娠
893	1	C00016410	信近翠	＜35	33	1	拮抗剂方案	2	390.625	≤10天	8	＞3000	3125	HCG	2	3	1	继发不孕	2.3	≤24	22.3	女方因素	5	3.79	1060	1.64	3	8.14	4.1	30.1	1	8	11.3	B	IVF	3	0	1	0	1	1	0	否	是	移植	未妊娠
895	1	C00018304	李玲	≥35	37	1	刺激方案	1	300	＞10天	11	＞3000	3300	HCG	4	0	0	原发不孕	1.3	≤24	22.7	男方因素	5	1.87	1052.14	0.78	4	7.82	2.22	14	2	8	5.6	B	ICSI	1	0	1	1	0	0	0	否	否	全胚冷冻
896	1	C00004146	孙翠青	≥35	38	1	降调节方案	3	352.5	≤10天	10	＞3000	3525	HCG	1	4	1	继发不孕	1.1	＞24	26.6	女方因素	5	0.75	1051	0.44	5	9.42	3.35	47.5	4	7	11.5	A	IVF	3	0	1	0	0	0	0	否	否	全胚冷冻
898	1	C00013097	张红芹	＜35	32	2	拮抗剂方案	2	325	≤10天	10	＞3000	3250	HCG	3	2	0	继发不孕	2.27	＞24	25.4	女方因素	5	2.63	1050	0.64	6	9.41	4.89	61	1	16	10.3	A	IVF	0	0	0	0	0	0	0	是		无可移植胚胎
899	1	C00019217	张玉	＜35	34	2	降调节方案	3	372.727	＞10天	11	＞3000	4100	HCG	5	2	0	继发不孕	1.26	≤24	22.8	女方因素	5	1.69	1049.33	0.92	6	6.5	2.64	27.05	1	13	1.39	A	IVF	4	0	2	1	2	2	0	否	是	移植	未妊娠
902	1	C00010426	司继兰	≥35	41	1	降调节方案	3	381.25	＞10天	12	＞3000	4575	HCG	1	4	1	继发不孕	1.9	≤24	20.5	女方因素	5	1.01	1000	0.8	5	8.13	3.42	56	2	9	11.9	A	IVF	5	0	0	0	0	0	0	是		无可移植胚胎
906	1	2018070097	丁杨杨	＜35	33	2	降调节方案	3	346.154	＞10天	13	＞3000	4500	HCG	5	2	1	继发不孕	1.75	≤24	22	女方因素	4	3.26	976	0.52	6	7.77	5.8	57	1	10	12.4	A-B	IVF	4	0	2	0	0	0	0	否	否	全胚冷冻
907	1	2018060187	张春霞	≥35	46	1	拮抗剂方案	2	347.5	≤10天	10	＞3000	3475	HCG	1	2	1	继发不孕	2.46	≤24	20.9	男方因素	4	0.95	975	1.2	6	10.2	8.09	35.42	2	8	12.8	A-B	ICSI	3	0	0	0	0	0	0	是		无可移植胚胎
908	1	C00018217	乔玺睿	≥35	37	1	降调节方案	3	294.231	＞10天	13	＞3000	3825	HCG	3	0	0	原发不孕	2.89	＞24	28.3	女方因素	4	2.89	973.26	1.07	5	6.29	2.97	23.07	2	14	11.3	A	IVF	3	0	2	0	2	2	0	否	是	移植	未妊娠
909	1	C00015292	柳海华	≥35	39	2	拮抗剂方案	2	357.143	≤10天	7	≤3000	2500	HCG	4	5	1	继发不孕	2.82	≤24	22	女方因素	4	2.53	968	1.29	3	7.81	3.61	53	2	8	10.9	A-B	IVF	3	0	2	0	2	2	0	否	是	移植	未妊娠
915	1	C00011619	化树慧	≥35	41	2	拮抗剂方案	2	300	≤10天	10	≤3000	3000	HCG	1	1	0	继发不孕	1.73	＞24	31.6	混合因素	4	2.78	957	0.79	2	11.77	8.74	35.21	2	8	15.7	A-B	ICSI	1	0	1	0	1	2	0	否	是	移植	已妊娠	临床妊娠	宫内妊娠	单胎宫内妊娠
917	1	C00014721	杨冠敏	＜35	34	2	降调节方案	3	362.5	＞10天	12	＞3000	4350	HCG	1	2	1	继发不孕	1.58	≤24	21.8	女方因素	4	1.71	954	0.7	3	5.78	6.48	30	1	8	14.4	A	IVF	2	0	2	2	2	2	0	否	是	移植	未妊娠
921	1	C00006116	邹丽艳	≥35	37	2	拮抗剂方案	2	412.5	≤10天	10	＞3000	4125	HCG	6	0	0	原发不孕	1.85	≤24	21.3	女方因素	4	3.54	928	0.44	5	12.14	4.48	18	2	12	10.5	A	IVF	4	0	4	3	2	2	0	否	是	移植	已妊娠	临床妊娠	宫内妊娠	单胎宫内妊娠
922	1	C00013404	于欣	≥35	42	2	拮抗剂方案	2	333.333	≤10天	9	≤3000	3000	HCG	5	4	1	继发不孕	1.28	＞24	24.2	女方因素	4	3.82	892	0.18	4	10.53	4.08	58	2	8	9.6	B	IVF	2	1	3	2	2	2	0	否	是	移植	未妊娠
923	1	2017120180	薛广华	≥35	38	2	刺激方案	1	300	＞10天	15	＞3000	4500	HCG	3	2	0	继发不孕	0.65	＞24	28	不明原因	4	1.77	890	0.58	4	8.15	2.04	34.56	4	5	13	B	IVF	2	0	1	0	0	0	0	否	否	全胚冷冻
924	1	C00007623	王金凤	≥35	38	1	降调节方案	3	373.438	＞10天	16	＞3000	5975	HCG	8	2	1	继发不孕	2.28	＞24	24.4	女方因素	4	1.09	887	0.36	2	9.59	4.79	40	2	8	0.61	B-C	IVF	1	0	0	0	0	0	0	是		无可移植胚胎
931	1	2017110132	王玉影	≥35	43	1	刺激方案	1	337.5	＞10天	12	＞3000	4050	HCG	3	3	1	继发不孕	0.33	≤24	22.3	混合因素	4	17.98	860	1.64	4	5.93	3.5	67.09	4	5	5	C	ICSI	3	0	2	0	0	0	0	否	否	全胚冷冻
934	1	C00018499	汪晓宁	＜35	33	2	刺激方案	1	450	≤10天	10	＞3000	4500	HCG	3	1	1	继发不孕	1.05	≤24	20.6	女方因素	4	2.14	844.63	0.23	2	7.1	6.7	83	3	6	11.8	A-B	IVF	2	0	1	1	1	1	0	否	是	移植	未妊娠
939	1	C00005290	王金燕	≥35	43	2	拮抗剂方案	2	375	≤10天	10	＞3000	3750	HCG	6	1	0	继发不孕	1.68	≤24	22.7	混合因素	8	1.4	1794	3.47	7	10.99	6.04	102	2	11	1	A	ICSI	7	0	7	5	0	0	0	否	否	全胚冷冻
950	1	2018060052	卓延飞	＜35	28	1	刺激方案	1	340	＞10天	15	＞3000	5100	HCG	1	1	0	继发不孕	1.42	≤24	18.4	女方因素	4	14.57	700	2.2	3	12.55	5.32	30.74	1	6	4.7	B	IVF	2	0	1	0	0	0	0	否	否	全胚冷冻
951	1	C00018016	郝亚飞	≥35	38	2	刺激方案	1	300	＞10天	12	＞3000	3600	HCG	3	2	2	继发不孕	1.7	≤24	19.5	混合因素	4	18.94	687.06	0.58	0	15.02	5.69	33	2	7	5.5	B-C		0	0	0	0	0	0	0	是		未取到卵
952	1	C00017583	张柳柳	＜35	27	1	降调节方案	3	300	≤10天	9	≤3000	2700	HCG	1	1	0	继发不孕	2.42	≤24	20.2	女方因素	4	0.17	685	1.31	5	8.69	5.1	27	1	15	12	A	IVF	5	0	1	1	1	1	0	否	是	移植	已妊娠	临床妊娠	宫内妊娠	单胎宫内妊娠
957	1	2017040124	孟汝菁	＜35	28	1	刺激方案	1	400	＞10天	15	＞3000	6000	HCG	2	0	0	原发不孕	1.83	＞24	26.1	不明原因	4	9.94	536	1.87	1	5.97	4.31	32.32	1	9	4.2		IVF	0	0	0	0	0	0	0	是		无可移植胚胎
958	1	C00003396	邵明娥	≥35	39	2	刺激方案	1	450	≤10天	6	≤3000	2700	HCG	6	2	1	继发不孕	1.9	＞24	26	混合因素	4	10.88	511	1.37	4	20.62	6.47	52	2	8	10	A-B	ICSI	1	0	1	0	1	1	0	否	是	移植	未妊娠
959	1	C00011069	翟亚男	≥35	41	3	刺激方案	1	300	≤10天	10	≤3000	3000	HCG	6	0	0	原发不孕	2.66	≤24	20.9	混合因素	4	12.67	501	3.63	3	8.84	2.98	64	2	10	0.6	A-B	ICSI	2	0	1	0	0	0	0	否	否	全胚冷冻
961	1	2017110036	佟贞秀	≥35	42	1	拮抗剂方案	2	337.5	≤10天	10	＞3000	3375	HCG	2	2	1	继发不孕	0.18	≤24	20.1	混合因素	4	3.08	434	3.13	0	15.63	5.28	89.45	4	3	8.4	A-B		0	0	0	0	0	0	0	是		未取到卵
962	1	2017100236	张秀燕	＜35	28	2	刺激方案	1	415.909	＞10天	11	＞3000	4575	HCG	2	1	0	继发不孕	0.79	≤24	18.9	女方因素	4	1.96	1403	2.33	4	8.38	4.84	43	3	5	12.6	B	IVF	4	0	1	0	0	0	0	否	否	全胚冷冻
966	1	C00016440	张海燕	≥35	40	2	刺激方案	1	300	≤10天	7	≤3000	2100	HCG	3	1	0	继发不孕	1.81	≤24	21.1	女方因素	4	7.96	1392	1.14	4	6.66	4.06	57	2	10	0.9	A	IVF	3	0	2	0	0	0	0	否	否	全胚冷冻
968	1	2018010194	魏倩倩	＜35	31	1	刺激方案	1	337.5	＞10天	12	＞3000	4050	HCG	3	1	1	继发不孕	2.21	≤24	19.1	男方因素	4	2.25	1390	0.67	6	8.84	2.71	70.1	1	12	6.2	A-B	ICSI	2	0	1	1	0	0	0	否	否	全胚冷冻
981	1	2016050085	李祥敏	≥35	37	1	降调节方案	3	381.25	＞10天	12	＞3000	4575	HCG	1	1	1	继发不孕	2.44	≤24	20.2	女方因素	4	1.7	1350	1.23	2	5.04	2.14	39.09	2	10	9.4	B	IVF	2	0	2	0	2	2	0	否	是	移植	未妊娠
983	1	C00012746	李小会	≥35	35	1	刺激方案	1	337.5	≤10天	10	＞3000	3375	HCG	6	1	0	继发不孕	2.93	＞24	24.9	女方因素	4	3.17	1343	0.72	3	11.84	4.6	55	2	9	#NULL!		IVF	1	0	0	0	0	0	0	是		无可移植胚胎
984	1	C00010475	程莉	≥35	36	1	拮抗剂方案	2	325	＞10天	12	＞3000	3900	HCG	4	1	1	继发不孕	2.05	≤24	19.6	女方因素	4	5.46	1339	1.38	3	6.7	5.72	37	2	8	1.37	A	IVF	2	0	0	0	0	0	0	是		无可移植胚胎
987	1	C00011591	杜娜娜	≥35	35	1	刺激方案	1	300	≤10天	8	≤3000	2400	HCG	3	0	0	原发不孕	0.57	≤24	22	女方因素	4	8.15	1330	1.42	2	15.2	3.98	40	4	3	#NULL!		IVF	1	0	1	0	0	0	0	否	否	全胚冷冻
991	1	C00016925	王秋菊	≥35	40	1	刺激方案	1	300	＞10天	11	＞3000	3300	HCG	2	0	0	原发不孕	1.83	＞24	26.2	女方因素	4	5.09	1313	2.05	4	6.85	3.12	32	2	9	10.3	A-B	IVF	2	0	2	0	0	0	0	否	否	全胚冷冻
992	1	2017030255	郭英霞	≥35	41	2	降调节方案	3	321.429	＞10天	14	＞3000	4500	HCG	1	2	1	继发不孕	1.46	＞24	30.8	女方因素	4	1.15	1308	0.47	4	7.75	5.86	16	2	8	9	A	IVF	2	0	1	1	1	1	0	否	是	移植	未妊娠
993	1	C00011796	王爱敏	≥35	42	2	拮抗剂方案	2	300	＞10天	11	＞3000	3300	HCG	2	3	1	继发不孕	1.09	＞24	27.3	女方因素	4	4.39	1307.54	1.12	1	5.79	6.66	46	4	7	0.87	A-B	IVF	0	0	0	0	0	0	0	是		无可移植胚胎
996	1	C00015799	王媛媛	≥35	47	8	刺激方案	1	362.5	≤10天	8	≤3000	2900	HCG	3	3	1	继发不孕	0.89	≤24	23.5	混合因素	4	10.29	1298	1.39	4	10.9	4.82	30	4	9	6.2	A-B	ICSI	3	0	3	0	0	0	0	否	否	全胚冷冻
998	1	2017050130	徐友芳	＜35	34	1	刺激方案	1	319.737	＞10天	19	＞3000	6075	HCG	2	3	1	继发不孕	1.56	≤24	21.4	女方因素	4	2.16	1294	1.02	4	5.97	2.87	59.09	1	6	8.3	A	IVF	2	0	2	0	2	2	0	否	是	移植	已妊娠	生化妊娠	生化妊娠	生化妊娠
999	1	C00011992	王乃凤	≥35	45	2	刺激方案	1	393.75	≤10天	8	＞3000	3150	HCG	6	4	1	原发不孕	0.61	＞24	26.8	女方因素	4	4.36	1290	0.41	2	13.65	4.93	77	4	4	0.49	A-B	IVF	2	0	2	2	0	0	0	否	否	全胚冷冻
1002	1	C00017830	程雅萍	≥35	39	1	刺激方案	1	450	≤10天	10	＞3000	4500	HCG	10	0	0	原发不孕	2.43	＞24	28.7	男方因素	4	9.46	1269	1.39	5	9.66	5.27	39.17	2	10	0.46	A	ICSI	5	0	4	2	0	0	0	否	否	全胚冷冻
1006	1	C00016897	王超男	≥35	35	1	降调节方案	3	300	＞10天	12	＞3000	3600	HCG	10	1	1	继发不孕	2.83	≤24	22.3	女方因素	4	4.98	1244	1.14	3	9.57	3.05	44	2	10	14.7	B	IVF	3	0	1	0	0	0	0	否	否	全胚冷冻
1008	1	C00009736	翟亚男	≥35	40	2	刺激方案	1	300	≤10天	8	≤3000	2400	HCG	6	0	0	原发不孕	1.22	≤24	20.9	女方因素	4	11.79	1239	2.31	2	8.84	2.98	64	2	8	0.69	A-B	IVF	0	0	0	0	0	0	0	是		无可移植胚胎
1010	1	2016090108	宋宗玲	≥35	43	1	降调节方案	3	309.375	≤10天	8	≤3000	2475	HCG	1	2	0	继发不孕	0.21	≤24	23.3	混合因素	4	6.94	1232.93	1.37	4	17.42	4.67	66.6	4	5	9.5	B	ICSI	2	0	1	0	0	0	0	否	否	全胚冷冻
1013	1	C00011707	胡建琳	≥35	44	2	刺激方案	1	300	＞10天	11	＞3000	3300	HCG	1	6	2	继发不孕	0.96	≤24	20.7	女方因素	4	20.17	1221	1.04	5	7.7	9.92	38.33	4	9	0.68	B-C	IVF	3	0	2	1	0	0	0	否	否	全胚冷冻
1015	1	C00016139	汪晓宁	＜35	33	1	刺激方案	1	300	≤10天	9	≤3000	2700	HCG	3	1	1	继发不孕	1.09	≤24	20.6	女方因素	4	18.5	1206	0.87	3	7.1	4.2	83	3	6	0.59	A	IVF	2	0	2	1	0	0	0	否	否	全胚冷冻
1016	1	C00017862	王艳玲	≥35	45	1	拮抗剂方案	2	300	＞10天	11	＞3000	3300	HCG	1	3	1	继发不孕	0.55	≤24	17.1	女方因素	4	5.79	1205	1.05	6	3.24	2.04	91.75	4	9	10.8	A-B	IVF	4	0	2	0	2	2	0	否	是	移植	未妊娠
1017	1	C00007557	张琳	≥35	36	1	降调节方案	3	292.5	≤10天	10	≤3000	2925	HCG	4	2	0	继发不孕	1.55	＞24	25.7	女方因素	4	1.27	1202	1.24	8	11.32	2.1	69	2	12	0.83	A-B	IVF	3	1	4	1	2	2	0	否	是	移植	未妊娠
1019	1	C00007082	王凤霞	＜35	34	1	刺激方案	1	346.875	≤10天	8	≤3000	2775	HCG	6	0	0	原发不孕	1.17	≤24	21	女方因素	4	18.25	1195	0.88	2	13.21	5.76	29	3	6	0.45	A-B	IVF	1	0	1	0	0	0	0	否	否	全胚冷冻
1021	1	C00009097	王静	≥35	37	2	刺激方案	1	436.364	＞10天	11	＞3000	4800	HCG	3	2	1	继发不孕	0.81	≤24	20.2	混合因素	4	6.02	1189	0.66	2	10.1	2.5	36	4	6	0.82	A-B	ICSI	1	0	1	0	0	0	0	否	否	全胚冷冻
1023	1	2016030216	孙蕾	≥35	37	2	刺激方案	1	375	≤10天	7	≤3000	2625	HCG	3	2	0	继发不孕	2.95	≤24	19.5	不明原因	4	3.86	1180	0.62	4	7.2	4.96	46.43	2	10	#NULL!		IVF	3	0	2	1	2	2	0	否	是	移植	未妊娠
1024	1	2016020156	刘红	≥35	46	1	刺激方案	1	300	≤10天	9	≤3000	2700	HCG	2	4	1	继发不孕	0.33	＞24	26	女方因素	4	3.24	1178	1.65	2	14.56	5.71	78.43	4	4	8.9	B	IVF	1	0	1	1	0	0	0	否	否	全胚冷冻
1025	1	2016120140	邹琳	＜35	30	3	刺激方案	1	375	≤10天	8	≤3000	3000	HCG	1	1	0	原发不孕	1.49	≤24	23.8	女方因素	4	3.27	1159	1.41	3	8.75	7.54	46.43	1	8	18.7	A	IVF	3	0	2	0	0	0	0	否	否	全胚冷冻
1026	1	C00016009	高娟	≥35	38	1	降调节方案	3	337.5	＞10天	12	＞3000	4050	HCG	7	0	0	原发不孕	1.41	≤24	21.9	女方因素	4	1.36	1159	0.93	3	11.17	5.85	32	2	10	12	B	IVF	0	0	1	0	1	1	0	否	是	移植	未妊娠
1027	1	2017030257	解玲玲	≥35	40	1	刺激方案	1	360	≤10天	10	＞3000	3600	HCG	2	3	1	继发不孕	0.35	≤24	21.2	女方因素	4	2.81	1149	0.59	4	14.96	6.73	86.43	4	6	14.3	A-B	IVF	4	0	2	1	2	2	0	否	是	移植	未妊娠
1028	1	C00004090	蔡云珠	＜35	34	1	刺激方案	1	429.545	＞10天	11	＞3000	4725	双扳机	2	2	1	继发不孕	2.5	＞24	30.5	女方因素	4	4.06	1149	0.42	5	7.95	6.16	75.13	1	15	8.3	B	IVF	3	0	1	0	0	0	0	否	否	全胚冷冻
1031	1	2018010218	王光爱	≥35	37	1	降调节方案	3	380	＞10天	15	＞3000	5700	HCG	3	2	1	继发不孕	1.89	≤24	20.8	男方因素	4	0.71	1130	0.78	5	7.54	4.77	46	2	9	1.14	A	ICSI	3	0	1	0	1	1	0	否	是	移植	未妊娠
1034	1	C00004888	李辉	＜35	31	1	刺激方案	1	383.333	≤10天	9	＞3000	3450	HCG	3	0	0	原发不孕	3.49	≤24	21.1	男方因素	4	10.11	1125	1.13	6	11.52	3.25	60	1	16	0.51	A	ICSI	0	0	0	0	0	0	0	是		无可移植胚胎
1037	1	C00003364	王梅	≥35	45	2	拮抗剂方案	2	500	≤10天	8	＞3000	4000	HCG	2	3	1	继发不孕	0.20	≤24	22.5	混合因素	4	6.99	1121	1.25	3	14.28	8.33	89	4	5	16	A	ICSI	2	0	1	0	0	0	0	否	否	全胚冷冻
1039	1	C00005745	杨春荣	≥35	42	1	刺激方案	1	352.5	≤10天	10	＞3000	3525	HCG	3	1	1	继发不孕	0.59	≤24	23	混合因素	4	7.62	1112	0.79	3	8.44	4.12	36	4	7	1.08	A	ICSI	2	0	1	1	0	0	0	否	否	全胚冷冻
1040	1	2017030006	张玉玉	≥35	44	2	刺激方案	1	300	≤10天	9	≤3000	2700	HCG	8	1	1	继发不孕	1.13	≤24	21.7	女方因素	4	4.29	1109	0.7	5	14.6	3.06	66.06	4	6	9	A	IVF	2	0	1	0	0	0	0	否	否	全胚冷冻
1041	1	C00006584	闫宁宁	＜35	28	1	刺激方案	1	435.938	＞10天	16	＞3000	6975	双扳机	5	1	0	继发不孕	2.71	≤24	21.3	混合因素	4	3.07	1785	1.46	3	10.84	4.11	51	1	7	0.95	B	ICSI	2	0	2	0	0	0	0	否	否	全胚冷冻
1042	1	2016040031	张民	≥35	42	5	降调节方案	3	558.929	＞10天	14	＞3000	7825	HCG	9	1	1	继发不孕	0.42	≤24	19.5	混合因素	4	2.7	1784	1.28	2	15.37	3.65	18	4	3	11.5	B	ICSI	2	0	1	0	0	0	0	否	否	全胚冷冻
1043	1	2016050016	王华晨	≥35	41	1	降调节方案	3	346.875	≤10天	8	≤3000	2775	HCG	1	5	1	继发不孕	0.44	＞24	26.6	女方因素	4	5.25	1781	0.9	2	7.18	2.81	40	4	3	6.4		IVF	2	0	2	1	0	0	0	否	否	全胚冷冻
1046	1	C00016380	王立赛	＜35	31	1	降调节方案	3	397.5	≤10天	10	＞3000	3975	HCG	1	0	0	原发不孕	1.54	≤24	23.8	混合因素	4	4.29	1769	1.13	4	10.56	5.92	41.61	1	8	12.2	A	ICSI	1	1	2	0	1	1	0	否	是	移植	未妊娠
1047	1	2017030271	许玲	≥35	42	1	拮抗剂方案	2	330	≤10天	10	＞3000	3300	HCG	3	0	0	原发不孕	0.39	≤24	20.4	女方因素	4	1.39	1753	0.62	4	12.9	2.9	40.37	4	6	11.2	B	IVF	3	0	2	0	0	0	0	否	否	全胚冷冻
1049	1	C00012895	刘萍	≥35	41	3	拮抗剂方案	2	290.625	≤10天	8	≤3000	2325	HCG	2	2	0	继发不孕	1.53	≤24	18.6	女方因素	4	4.01	1749	0.88	7	10.77	6.86	53	2	11	16.3	A-B	IVF	3	0	2	0	0	0	0	否	否	全胚冷冻
1051	1	2016040138	李秀梅	≥35	41	2	刺激方案	1	416.667	≤10天	9	＞3000	3750	HCG	1	4	1	继发不孕	1.13	＞24	26	男方因素	4	1.24	1736	0.75	2	10.45	2.59	39	4	7	7.3	B	ICSI	0	0	0	0	0	0	0	是		无可移植胚胎
1053	1	2016050236	王凤杰	≥35	39	1	降调节方案	3	350	＞10天	13	＞3000	4550	HCG	6	1	1	继发不孕	0.66	≤24	22.6	女方因素	4	1.3	1706	0.48	1	7	4.87	41.75	4	3	12.6	B	IVF	1	0	0	0	0	0	0	是		无可移植胚胎
1056	1	2018040162	梁宁宁	＜35	33	1	降调节方案	3	394.118	＞10天	17	＞3000	6700	HCG	1	0	0	原发不孕	2.26	＞24	26	女方因素	4	1.03	1689	0.8	6	7.84	6.54	36.6	1	20	20.8	A	IVF	1	0	1	0	0	0	0	否	否	全胚冷冻
1058	1	C00016021	张春燕	＜35	32	2	降调节方案	3	323.077	＞10天	13	＞3000	4200	HCG	4	0	0	原发不孕	1.4	≤24	19.7	男方因素	4	1.5	1671	0.74	4	16.9	4.35	17	1	8	12.1	A	ICSI	2	0	2	0	2	2	0	否	是	移植	未妊娠
1060	1	2018070105	吕倩倩	＜35	34	2	刺激方案	1	375	≤10天	9	＞3000	3375	HCG	6	1	1	继发不孕	1.23	＞24	29.6	混合因素	4	9.49	1648	0.8	5	6.75	2.99	86.43	1	9	7.4	A-B	ICSI	2	0	2	2	0	0	0	否	否	全胚冷冻
1061	1	C00015479	李霞	≥35	39	1	拮抗剂方案	2	364.286	≤10天	7	≤3000	2550	HCG	3	1	1	继发不孕	1.41	≤24	21.8	女方因素	4	9.73	1644	0.69	3	7.46	4.78	52.36	2	9	#NULL!		IVF	3	0	1	0	1	1	0	否	是	移植	未妊娠
1063	1	C00005969	周金娟	≥35	35	2	拮抗剂方案	2	321.429	≤10天	7	≤3000	2250	HCG	1	0	0	继发不孕	2.32	≤24	14.9	男方因素	4	1.13	1641	0.96	4	6.3	3.39	54	2	7	14.7	B	ICSI	2	0	0	0	0	0	0	是		无可移植胚胎
1070	1	C00012310	李延华	≥35	39	2	拮抗剂方案	2	305.556	≤10天	9	≤3000	2750	双扳机	12	1	1	继发不孕	3.47	≤24	21.9	混合因素	4	3.48	1574	1.24	3	5.8	3.1	68	2	10	12.6	B	ICSI	3	0	3	1	2	2	0	否	是	移植	未妊娠
1071	1	2016030159	孙姣姣	＜35	29	1	降调节方案	3	333.333	≤10天	9	≤3000	3000	HCG	6	0	0	原发不孕	2.22	≤24	21.4	男方因素	4	2.36	1572	1.48	6	8.61	3.38	40.09	1	12	11.5	A	ICSI	1	0	1	0	0	0	0	否	否	全胚冷冻
1073	1	C00013061	崔玉芹	≥35	41	1	拮抗剂方案	2	291.667	≤10天	9	≤3000	2625	HCG	3	0	0	原发不孕	0.66	≤24	22.6	女方因素	4	2.67	1568	0.26	3	11.15	5.59	25	4	7	11.9	A	IVF	2	0	2	2	2	2	0	否	是	移植	已妊娠	临床妊娠	宫外妊娠	异位妊娠
1080	1	C00016430	刘议璐	＜35	30	1	刺激方案	1	300	≤10天	6	≤3000	1800	HCG	4	0	0	原发不孕	0.54	≤24	22	女方因素	4	8.82	1541	0.68	1	4.79	3.1	35.73	3	6	6.2	A-B	IVF	1	0	1	1	0	0	0	否	否	全胚冷冻
1083	1	2016080191	郝玉婷	≥35	36	1	降调节方案	3	354.545	＞10天	11	＞3000	3900	HCG	4	1	0	继发不孕	2.1	≤24	23.4	女方因素	4	5.08	1520	1.88	2	8.36	4.34	66.61	2	11	8.4	A	IVF	1	0	1	0	1	1	0	否	是	移植	未妊娠
1088	1	C00012620	薛银春	≥35	36	1	降调节方案	3	312.727	＞10天	11	＞3000	3440	HCG	1	2	0	继发不孕	0.6	＞24	30	女方因素	4	10.28	1490	1.06	3	13.41	6.24	53	4	5	13	A	IVF	2	0	2	0	0	0	0	否	否	全胚冷冻
1091	1	C00006423	叶丽杰	≥35	37	1	降调节方案	3	384.615	＞10天	13	＞3000	5000	HCG	8	0	0	原发不孕	2.54	＞24	24.3	女方因素	4	0.44	1476	0.97	5	5.52	3.9	72	2	11	9.2	A	IVF	3	1	2	0	0	0	0	否	否	全胚冷冻
1093	1	2018030291	吕彦娜	≥35	37	2	刺激方案	1	375	＞10天	11	＞3000	4125	HCG	2	5	3	继发不孕	2.24	＞24	25.7	女方因素	4	4.9	1471	0.63	3	11.26	4.01	93	2	6	4.5	A	IVF	2	0	2	0	0	0	0	否	否	全胚冷冻
1094	1	C00005251	张茹	＜35	31	1	拮抗剂方案	2	387.5	≤10天	6	≤3000	2325	HCG	1	0	0	原发不孕	1.64	≤24	20.7	女方因素	4	8.37	1463	1.38	4	14.8	5.78	82	1	9	11.6	A	IVF	2	1	3	1	2	2	0	否	是	移植	已妊娠	临床妊娠	宫内妊娠	单胎宫内妊娠
1096	1	C00015652	解玉萍	＜35	29	1	拮抗剂方案	2	313.889	≤10天	9	≤3000	2825	HCG	5	0	0	原发不孕	2.60	＞24	27.6	女方因素	4	2.07	1456	1.41	5	7.53	5.91	45	1	10	18.8	A	IVF	3	0	2	0	0	0	0	否	否	全胚冷冻
1097	1	2016090092	姜丽敏	≥35	36	1	降调节方案	3	375	≤10天	9	＞3000	3375	HCG	10	0	0	原发不孕	0.59	＞24	29.3	女方因素	4	5.41	1456	0.67	4	5.23	2.89	40	4	6	#NULL!		IVF	3	0	2	1	2	2	0	否	是	移植	未妊娠
1099	1	2017050084	张华倩	≥35	39	1	降调节方案	3	353.571	≤10天	7	≤3000	2475	HCG	2	3	1	继发不孕	1.46	≤24	22.1	混合因素	4	4.57	1447	0.47	4	8.67	2.65	51.38	2	6	11.6	A	ICSI	1	0	1	0	1	1	0	否	是	移植	未妊娠
1103	1	C00010576	李延华	≥35	38	1	降调节方案	3	306.25	＞10天	12	＞3000	3675	HCG	12	1	1	继发不孕	2.63	≤24	21.9	混合因素	4	1.4	1427	0.46	5	5.8	3.1	68	2	7	16	B	ICSI	5	0	1	1	0	0	0	否	否	全胚冷冻
1105	1	C00015561	王全英	≥35	42	2	刺激方案	1	300	＞10天	12	＞3000	3600	HCG	1	1	1	继发不孕	0.9	＞24	28.2	女方因素	4	11.73	1420	0.61	1	6.9	2.74	19.7	4	6	1.26	A-B	IVF	0	0	0	0	0	0	0	是		无可移植胚胎
1108	1	2016030095	王崇芬	≥35	44	1	降调节方案	3	320.455	＞10天	11	＞3000	3525	HCG	3	3	1	原发不孕	0.07	＞24	25.8	混合因素	4	3.15	1412	0.65	0	17.83	2.92	81.75	4	2	9.5	A		0	0	0	0	0	0	0	是		未取到卵
1110	1	C00016836	张淑华	≥35	35	2	刺激方案	1	450	≤10天	8	＞3000	3600	HCG	3	1	1	继发不孕	3.03	≤24	23	女方因素	4	10.61	1405	0.59	4	10.18	3.21	58	2	8	0.55	A	IVF	4	0	4	2	0	0	0	否	否	全胚冷冻
1111	1	C00008130	刘敏	＜35	28	2	刺激方案	1	375	≤10天	9	＞3000	3375	HCG	1	1	0	继发不孕	1.59	＞24	24.2	女方因素	4	8.2	1405	0.28	3	4.02	2.87	34.04	1	10	4.1	A	IVF	2	0	2	0	0	0	0	否	否	全胚冷冻
1113	1	C00009647	冯珂珂	＜35	33	1	刺激方案	1	300	≤10天	7	≤3000	2100	HCG	2	0	0	原发不孕	1.24	≤24	18.9	女方因素	4	14.56	1398	0.81	3	9.15	6.81	49	1	6	0.37	A	IVF	3	0	2	0	0	0	0	否	否	全胚冷冻
1120	1	2017090285	刘玉玲	≥35	39	4	刺激方案	1	400	≤10天	9	＞3000	3600	HCG	2	2	1	继发不孕	0.47	＞24	24.7	混合因素	4	8.18	1386	0.51	3	12.9	2.9	40.37	4	7	7.2	B-C	ICSI	3	0	1	0	0	0	0	否	否	全胚冷冻
1123	1	C00012144	蒙延坤	＜35	32	1	拮抗剂方案	2	322.5	≤10天	10	＞3000	3225	HCG	6	3	2	继发不孕	2.47	＞24	24.2	女方因素	4	7.71	1363	0.5	5	10.3	3.47	63	1	10	8.1	A	IVF	2	0	2	1	2	2	0	否	是	移植	已妊娠	临床妊娠	宫内妊娠	单胚胎停
1125	1	2016040230	侯延芬	≥35	44	5	刺激方案	1	450	≤10天	9	＞3000	4050	HCG	6	3	2	继发不孕	0.26	＞24	26.9	女方因素	4	2.71	1361	0.49	3	14.72	3.44	81	4	4	6	B	IVF	3	0	2	0	0	0	0	否	否	全胚冷冻
1126	1	2017030260	刘丽娟	＜35	34	2	降调节方案	3	381.818	＞10天	11	＞3000	4200	HCG	1	1	0	原发不孕	1.58	≤24	23.9	女方因素	4	0.78	1360	0.66	3	8.87	5.88	40	1	8	13	A	IVF	2	0	2	1	2	2	0	否	是	移植	已妊娠	临床妊娠	宫外妊娠	异位妊娠
1127	1	2017060028	许艳芳	≥35	45	3	拮抗剂方案	2	333.333	≤10天	9	≤3000	3000	HCG	2	3	2	继发不孕	0.45	＞24	24.8	女方因素	4	0.45	1355	2.84	1	9.69	4.95	56.4	4	7	22.1	B	IVF	0	0	1	0	0	0	0	否	否	全胚冷冻
1131	1	C00017260	崔玉芹	≥35	42	2	拮抗剂方案	2	300	＞10天	13	＞3000	3900	HCG	3	1	0	继发不孕	1.5	≤24	22.6	女方因素	4	3.46	1343	0.61	4	11.15	5.59	25	2	10	12.2	A	IVF	4	0	3	2	2	2	0	否	是	移植	未妊娠
1132	1	2016080011	李翠香	≥35	46	1	拮抗剂方案	2	393.75	≤10天	8	＞3000	3150	HCG	1	4	1	继发不孕	0.27	≤24	23.4	混合因素	4	2.85	1339	0.8	3	9.68	4.61	29	4	3	5.9	A-B	ICSI	1	0	0	0	0	0	0	是		无可移植胚胎
1134	1	2018040185	张文	＜35	34	1	拮抗剂方案	2	300	＞10天	13	＞3000	3900	HCG	3	0	0	原发不孕	1.28	≤24	23.9	男方因素	4	1.03	1335	0.31	6	9.84	6.84	35.91	1	8	8.3	B	ICSI	4	0	0	0	0	0	0	是		无可移植胚胎
1135	1	C00017499	魏媛媛	≥35	35	1	刺激方案	1	300	＞10天	15	＞3000	4500	HCG	1	1	0	继发不孕	2.92	≤24	22.2	女方因素	4	22.58	1330	2.04	3	9.02	5.58	58	2	7	6.3	B	IVF	1	0	0	0	0	0	0	是		无可移植胚胎
1136	1	2018040156	曲姗姗	＜35	27	1	降调节方案	3	302.778	≤10天	9	≤3000	2725	HCG	6	0	0	原发不孕	3.0	≤24	20.4	不明原因	4	0.82	1318	0.76	6	6.61	5.39	35.42	1	15	11.7	A	IVF	5	0	0	0	0	0	0	是		无可移植胚胎
1137	1	C00017201	禇延苓	≥35	41	4	刺激方案	1	450	≤10天	10	＞3000	4500	HCG	1	4	0	继发不孕	0.29	≤24	22.9	女方因素	4	17.24	1317	1.06	0	12.58	4.64	13	4	6	6	A		0	0	0	0	0	0	0	是		未取到卵
1139	1	C00012619	李婷	≥35	42	3	刺激方案	1	300	≤10天	9	≤3000	2700	HCG	1	3	1	继发不孕	0.18	≤24	24	女方因素	4	3.43	1313	0.89	2	17.08	5.6	26	4	5	0.88	A-B	IVF	1	0	1	0	1	1	0	否	是	移植	未妊娠
1142	1	C00012754	刘秀秀	＜35	32	1	刺激方案	1	363.462	＞10天	13	＞3000	4725	HCG	8	1	1	继发不孕	1.24	≤24	22.9	女方因素	4	2.68	1304	0.21	6	5.59	2.38	40	1	15	11.5	B	IVF	6	0	4	1	2	2	0	否	是	移植	已妊娠	临床妊娠	宫内妊娠	单胎宫内妊娠
1145	1	2017020131	张晓云	≥35	42	1	刺激方案	1	370.588	＞10天	17	＞3000	6300	HCG	3	2	1	继发不孕	0.85	＞24	24.4	女方因素	4	5.28	1297	0.79	2	14.91	5.1	53.77	4	3	7.1	A	IVF	0	0	0	0	0	0	0	是		未受精
1149	1	2016040188	温莹	≥35	43	1	降调节方案	3	350	＞10天	12	＞3000	4200	HCG	4	2	0	继发不孕	1.73	≤24	21.2	女方因素	4	1.35	1274	1.57	4	5.96	6.45	37	2	11	12.6	A	IVF	2	0	2	1	0	0	0	否	否	全胚冷冻
1151	1	2018060093	孙敏	＜35	34	4	刺激方案	1	450	≤10天	8	＞3000	3600	HCG	3	1	0	继发不孕	1.13	≤24	19.4	不明原因	4	9	1269	0.62	3	8.6	4.2	51	3	6	5.4	B	ICSI	3	0	1	0	0	0	0	否	否	全胚冷冻
1154	1	2017070151	葛锦秀	＜35	34	1	降调节方案	3	450	≤10天	10	＞3000	4500	HCG	5	0	0	继发不孕	1.12	＞24	27.3	混合因素	4	2.46	1244	0.85	3	7.86	3.22	42.42	3	5	8.7	A	ICSI	3	0	2	1	0	0	0	否	否	全胚冷冻
1162	1	2017090169	卜凡燕	≥35	40	3	刺激方案	1	300	＞10天	11	＞3000	3300	HCG	7	2	1	继发不孕	0.14	＞24	26.6	男方因素	4	5.88	1212	0.69	3	16.42	9.74	40	4	4	12.5	A	ICSI	1	0	0	0	0	0	0	是		无可移植胚胎
1163	1	C00006902	何道英	≥35	40	2	降调节方案	3	321.875	＞10天	24	＞3000	7725	HCG	3	1	1	继发不孕	1.34	＞24	25.4	女方因素	4	8.97	1206	1.39	4	9.27	3.46	68	2	15	1	A-B	IVF	2	0	2	0	2	2	0	否	是	移植	未妊娠
1164	1	2018040187	杨金红	≥35	41	2	刺激方案	1	300	≤10天	10	≤3000	3000	HCG	3	4	1	继发不孕	0.88	≤24	21.8	不明原因	4	0.9	1205	0.48	3	8.72	3.53	73	4	4	7	A-B	IVF	2	0	0	0	0	0	0	是		无可移植胚胎
1169	1	2017040101	郇长花	≥35	40	1	刺激方案	1	425	≤10天	5	≤3000	2125	HCG	1	0	0	继发不孕	0.53	＞24	27.2	混合因素	4	9.97	1189	0.93	3	15.28	6.25	55.46	4	5	8.8	B	ICSI	3	0	2	0	2	2	0	否	是	移植	未妊娠
1172	1	2016060084	商伟伟	＜35	30	1	降调节方案	3	342.308	＞10天	13	＞3000	4450	HCG	2	1	0	继发不孕	1.68	≤24	20.4	女方因素	4	1.69	1178	0.54	5	6.3	3.2	24	1	8	11.7	A	IVF	5	0	4	1	2	2	0	否	是	移植	未妊娠
1174	1	2016060052	李玲玲	＜35	29	1	降调节方案	3	390	≤10天	10	＞3000	3900	HCG	4	0	0	原发不孕	0.28	≤24	23.7	女方因素	4	2.67	1159	0.95	3	9.6	6.3	21.3	3	5	9.4	B	IVF	3	0	2	0	2	2	0	否	是	移植	已妊娠	临床妊娠	宫内妊娠	单胎宫内妊娠
1175	1	2016060251	亓宗娥	≥35	44	1	刺激方案	1	300	≤10天	10	≤3000	3000	HCG	6	4	1	继发不孕	1.00	＞24	25.5	女方因素	4	11.01	1149	1.08	2	9.04	6.38	67	4	7	11	B	IVF	1	0	0	0	0	0	0	是		无可移植胚胎
1178	1	C00011469	董慧敏	＜35	33	1	拮抗剂方案	2	291.667	≤10天	9	≤3000	2625	HCG	4	2	0	继发不孕	2.81	≤24	20.8	女方因素	4	4.41	1143	0.72	5	6.77	2.92	52	1	11	10	A	IVF	2	0	0	0	0	0	0	是		无可移植胚胎
1179	1	C00013268	吕桂霞	≥35	38	1	拮抗剂方案	2	348.214	＞10天	14	＞3000	4875	HCG	4	3	1	继发不孕	1.62	≤24	21.3	女方因素	4	1.32	1130	1.12	8	14.87	5.25	23	2	11	10	A	IVF	5	0	2	0	2	2	0	否	是	移植	未妊娠
1185	1	C00016156	付学辉	≥35	43	1	降调节方案	3	340.909	＞10天	11	＞3000	3750	HCG	2	3	0	继发不孕	0.29	≤24	19.4	女方因素	4	2.18	1121	0.65	4	14.08	6.62	46.7	4	8	8.7	A	IVF	3	0	2	0	2	2	0	否	是	移植	未妊娠
1190	1	2016100224	许艳芳	≥35	44	2	刺激方案	1	406.25	＞10天	12	＞3000	4875	HCG	2	3	2	继发不孕	0.75	＞24	24.8	女方因素	4	0.88	1099	0.5	6	9.69	4.95	56.4	4	7	11	B	IVF	4	0	4	3	0	0	0	否	否	全胚冷冻
1191	1	C00010565	任淑青	≥35	46	1	拮抗剂方案	2	309.375	≤10天	8	≤3000	2475	双扳机	1	5	1	继发不孕	0.81	≤24	22.6	女方因素	4	1.12	1093	1.64	3	13.18	5.72	86	4	6	6.2		IVF	2	0	1	0	1	1	0	否	是	移植	未妊娠
1200	1	C00018106	刘海霞	＜35	31	1	拮抗剂方案	2	300	≤10天	9	≤3000	2700	HCG	1	0	0	原发不孕	1.16	≤24	23	男方因素	4	1.12	1050.15	0.93	4	6.05	3.59	28.09	3	5	12.8	A	ICSI	4	0	2	0	2	2	0	否	是	移植	未妊娠
1201	1	2016090254	张倩	＜35	24	2	刺激方案	1	407.143	＞10天	14	＞3000	5700	HCG	4	0	0	原发不孕	2.340	＞24	24.8	混合因素	4	4.27	1047	1.42	3	7.33	5.03	46	1	8	11	A	ICSI	1	0	0	0	0	0	0	是		无可移植胚胎
1203	1	C00017025	高丽娜	≥35	37	2	降调节方案	3	335	≤10天	10	＞3000	3350	HCG	3	2	0	继发不孕	2.93	≤24	23.4	混合因素	4	3.26	1038	0.83	5	11.49	3.49	58	2	8	10.6	A	ICSI	2	0	1	0	1	1	0	否	是	移植	未妊娠
1205	1	C00018942	杨青艳	＜35	32	1	拮抗剂方案	2	300	≤10天	9	≤3000	2700	HCG	3	0	0	继发不孕	1.05	＞24	29.3	女方因素	4	2.65	1021.29	1.26	4	17.63	5.13	39.21	3	7	14.4	B	IVF	3	0	3	1	2	2	0	否	是	移植	已妊娠	临床妊娠	宫内妊娠	单胎宫内妊娠
1207	1	C00010238	徐艳	≥35	47	2	刺激方案	1	292.5	≤10天	10	≤3000	2925	双扳机	2	4	0	继发不孕	0.32	≤24	24	女方因素	4	0.86	1013	0.64	4	9.86	4.54	44	4	8	5.8	A	IVF	2	0	2	1	0	0	0	否	否	全胚冷冻
1209	1	C00010247	巩向莉	＜35	32	1	降调节方案	3	371.591	＞10天	22	＞3000	8175	HCG	2	4	1	继发不孕	1.76	＞24	34.6	女方因素	4	0.63	1003	0.33	4	7.26	4.66	18	1	7	15.2	B	IVF	4	0	2	1	2	2	0	否	是	移植	未妊娠
1212	1	2017030315	张丹	≥35	36	2	降调节方案	3	300	≤10天	8	≤3000	2400	HCG	1	0	0	原发不孕	0.5	≤24	20.2	男方因素	4	13.25	1159	1.36	4	5.07	4.84	53.76	4	6	7.5	B	ICSI	3	0	2	0	0	0	0	否	否	全胚冷冻
1215	1	2016030152	刘艳丽	＜35	33	2	刺激方案	1	311.538	＞10天	13	＞3000	4050	HCG	5	2	1	原发不孕	2.19	＞24	32.4	女方因素	4	8.98	1149	1.09	4	5.3	3.19	41.75	1	10	16.7	A-B	IVF	4	0	2	0	2	2	0	否	是	移植	已妊娠	临床妊娠	宫内妊娠	单胚胎停
1217	1	2018060090	张敏	≥35	41	3	刺激方案	1	429.545	＞10天	11	＞3000	4725	HCG	5	1	0	继发不孕	1.31	＞24	29.1	不明原因	4	4.41	1143	0.72	4	9.8	4.85	77.07	2	8	6.3	B	IVF	1	0	1	0	0	0	0	否	否	全胚冷冻
1221	1	C00004990	巩加喜	≥35	49	3	降调节方案	3	400	≤10天	6	≤3000	2400	HCG	4	2	1	继发不孕	0.34	≤24	22	女方因素	3	5.44	995	1.09	3	7.3	4.14	28	4	11	11.7	A	IVF	1	0	1	1	1	1	0	否	是	移植	未妊娠
1222	1	C00010208	张海珠	＜35	31	2	拮抗剂方案	2	307.5	≤10天	10	＞3000	3075	双扳机	1	1	0	继发不孕	1.2	≤24	22.3	男方因素	3	2.08	988	0.78	7	7	3.42	22	1	8	12.3	A	ICSI	7	0	4	0	2	2	0	否	是	移植	已妊娠	临床妊娠	宫内妊娠	单胎宫内妊娠
1224	1	C00004984	狄冉	≥35	42	4	拮抗剂方案	2	431.25	≤10天	8	＞3000	3450	双扳机	2	3	1	继发不孕	1.91	＞24	26	男方因素	3	2.36	981	0.96	5	13.02	5.65	40	2	11	#NULL!		ICSI	3	0	1	0	0	0	0	否	否	全胚冷冻
1226	1	2014110127	李芳	＜35	28	1	降调节方案	3	375	≤10天	7	≤3000	2625	HCG	8	0	0	原发不孕	0.56	≤24	19.2	不明原因	3	5.43	974	2.33	1	15.04	4.61	67.45	3	4	16.2		IVF	0	0	0	0	0	0	0	是		未受精
1227	1	C00011456	张克彩	≥35	38	1	拮抗剂方案	2	300	≤10天	9	≤3000	2700	HCG	1	2	1	继发不孕	2.680	＞24	28.8	女方因素	3	14.43	973	0.9	2	6.73	4.17	41	2	9	1.53	A-B	IVF	1	0	0	0	0	0	0	是		无可移植胚胎
1229	1	C00013040	董雪	≥35	42	2	刺激方案	1	525	≤10天	4	≤3000	2100	双扳机	7	3	1	继发不孕	0.83	≤24	23.4	女方因素	3	28.34	970	0.83	1	14.47	5.78	65.37	4	6	0.6	B	IVF	0	0	0	0	0	0	0	是		无可移植胚胎
1230	1	C00015632	王小燕	≥35	38	2	刺激方案	1	300	≤10天	7	≤3000	2100	HCG	4	3	1	继发不孕	2.28	≤24	18.4	女方因素	3	1.97	969	1.08	2	11.33	6	65	2	8	0.55	A-B	IVF	1	0	1	1	0	0	0	否	否	全胚冷冻
1236	1	C00011956	廖淑芳	≥35	44	3	刺激方案	1	300	＞10天	11	＞3000	3300	HCG	3	1	1	继发不孕	0.29	＞24	30.4	女方因素	3	6.88	946	0.8	2	6.54	5.09	47	4	5	0.53	B-C	IVF	0	0	1	0	0	0	0	否	否	全胚冷冻
1238	1	C00012305	高世芹	≥35	40	3	刺激方案	1	300	≤10天	7	≤3000	2100	HCG	4	1	0	继发不孕	0.32	≤24	21	混合因素	3	6.92	942	1.03	3	10.09	5.42	41	4	6	0.53		ICSI	2	0	2	0	0	0	0	否	否	全胚冷冻
1242	1	C00004509	周金娟	＜35	34	1	降调节方案	3	365	≤10天	10	＞3000	3650	HCG	1	0	0	原发不孕	1.89	≤24	14.9	男方因素	3	0.26	934	1.21	2	6.3	3.39	54	1	7	13.8	A-B	ICSI	1	0	1	0	1	1	0	否	是	移植	未妊娠
1246	1	2016100169	江秀霞	≥35	41	1	刺激方案	1	332.143	＞10天	14	＞3000	4650	HCG	1	4	1	继发不孕	0.47	≤24	22	女方因素	3	5.2	926	0.81	3	5.97	6.84	38.25	4	3	13.2	A	IVF	2	0	1	0	0	0	0	否	否	全胚冷冻
1249	1	2017030146	吕红丽	＜35	33	1	刺激方案	1	300	≤10天	9	≤3000	2700	HCG	5	4	0	继发不孕	1.86	≤24	20.4	女方因素	3	8.9	911	1.49	#NULL!	7.48	4.67	29	1	15	9.5	A		0	0	0	0	0	0	0	是		未取卵
1251	1	C00004774	张三云	≥35	43	2	拮抗剂方案	2	425	≤10天	7	≤3000	2975	HCG	1	0	0	原发不孕	1.48	＞24	25.2	男方因素	3	2.14	907	0.37	4	10	2.66	69	2	11	14.6	A-B	ICSI	3	0	2	1	2	2	0	否	是	移植	已妊娠	临床妊娠	宫内妊娠	单胎宫内妊娠
1253	1	C00013045	吕玻霞	≥35	38	1	刺激方案	1	300	≤10天	8	≤3000	2400	HCG	1	1	1	继发不孕	1.6	＞24	33.1	女方因素	3	7.9	904	0.64	3	6.49	7.19	79	2	8	1.33	A	IVF	0	1	1	0	0	0	0	否	否	全胚冷冻
1254	1	2016070130	刘晓黎	≥35	35	1	刺激方案	1	300	≤10天	8	≤3000	2400	HCG	3	2	1	继发不孕	1.35	≤24	21.6	女方因素	3	2.54	904	0.77	4	8.63	4.92	25	2	7	10	A	IVF	2	0	2	1	0	0	0	否	否	全胚冷冻
1255	1	2017060143	李莎	＜35	30	1	降调节方案	3	380.769	＞10天	13	＞3000	4950	HCG	2	0	0	原发不孕	1.86	＞24	36.7	女方因素	3	2.53	903	0.52	4	7.42	4.74	40	1	11	13.7	A	IVF	3	0	3	1	2	2	0	否	是	移植	已妊娠	临床妊娠	宫内妊娠	单胎宫内妊娠
1271	1	2016040141	上官厚英	≥35	44	4	刺激方案	1	300	≤10天	8	≤3000	2400	HCG	3	3	1	继发不孕	0.32	＞24	25.8	不明原因	3	2.1	869	0.68	1	12.45	5.51	69.73	4	6	12.2	A-B	IVF	1	0	0	0	0	0	0	是		无可移植胚胎
1275	1	C00012424	付琳	＜35	31	1	降调节方案	3	300	＞10天	11	＞3000	3300	HCG	6	0	0	原发不孕	1.93	≤24	22.2	女方因素	3	1.37	856	0.14	3	5.02	3.94	31.38	1	7	11.4	A	IVF	1	0	1	1	1	1	0	否	是	移植	未妊娠
1282	1	2017100175	王凤芹	≥35	43	2	刺激方案	1	300	＞10天	13	＞3000	3900	HCG	3	4	4	继发不孕	0.64	＞24	24.8	混合因素	3	2.86	829	0.75	3	7.7	3.74	25	4	4	11.1	B	ICSI	2	0	2	0	2	2	0	否	是	移植	未妊娠
1285	1	2017030250	王慧	≥35	40	1	刺激方案	1	334.615	＞10天	13	＞3000	4350	HCG	7	3	1	继发不孕	1.41	＞24	30.1	女方因素	3	6.34	819	0.59	2	7.38	6.12	40	2	9	16	A-B	IVF	1	0	0	0	0	0	0	是		无可移植胚胎
1287	1	2016050212	冯国英	≥35	41	1	刺激方案	1	300	≤10天	10	≤3000	3000	HCG	2	4	2	继发不孕	0.95	＞24	29.3	女方因素	3	0.88	814	0.38	3	15.29	4.32	102	4	4	11	B	IVF	2	0	2	0	0	0	0	否	否	全胚冷冻
1289	1	2017070043	杨传梅	≥35	45	3	刺激方案	1	381.25	＞10天	12	＞3000	4575	HCG	4	6	2	继发不孕	0.93	＞24	25.6	女方因素	3	1.76	811	0.78	2	12.04	4.23	73.77	4	8	11.2	B	IVF	2	0	2	0	0	0	0	否	否	全胚冷冻
1290	1	C00004343	张心颖	≥35	41	3	拮抗剂方案	2	300	≤10天	9	≤3000	2700	HCG	1	1	0	继发不孕	1.2	≤24	19	混合因素	3	1.68	810	2.64	5	9.65	8.46	46.89	2	9	12.3	A	ICSI	4	0	0	0	0	0	0	是		无可移植胚胎
1292	1	2016040211	赵勤	≥35	43	1	刺激方案	1	300	≤10天	6	≤3000	1800	HCG	2	2	0	继发不孕	0.7	＞24	25.3	男方因素	3	2.5	804	0.46	1	13.03	4.34	46	4	4	13.8	A-B	ICSI	1	0	1	1	0	0	0	否	否	全胚冷冻
1294	1	C00005563	葛爱芹	≥35	47	1	刺激方案	1	330	≤10天	10	＞3000	3300	HCG	1	2	2	继发不孕	0.82	＞24	29.4	女方因素	3	3.07	788	0.33	3	12.9	2.9	40.37	4	6	15.9	B	IVF	3	0	2	0	0	0	0	否	否	全胚冷冻
1298	1	2018040201	杨红霞	≥35	40	1	拮抗剂方案	2	350	＞10天	12	＞3000	4200	HCG	4	1	0	继发不孕	1.5	＞24	26.3	男方因素	3	6.79	781	2.11	3	16.27	5.96	54.91	2	6	13.7	A	ICSI	1	0	0	0	0	0	0	是		无可移植胚胎
1299	1	2016120210	周秀娟	≥35	39	3	刺激方案	1	300	≤10天	10	≤3000	3000	HCG	11	0	0	原发不孕	0.77	＞24	28.8	男方因素	3	0.8	779	0.73	2	10.45	6.9	83	4	6	8.7	B	ICSI	2	0	2	2	0	0	0	否	否	全胚冷冻
1301	1	2017030065	张小明	≥35	40	1	降调节方案	3	393.75	＞10天	16	＞3000	6300	HCG	3	1	1	继发不孕	1.32	＞24	26	女方因素	3	1.02	773	0.74	6	6.19	5.8	52	2	8	12.4	A	IVF	3	0	0	0	0	0	0	是		无可移植胚胎
1303	1	2016060246	颜翠	＜35	31	1	刺激方案	1	290.625	≤10天	8	≤3000	2325	HCG	3	0	0	原发不孕	1.18	≤24	23	女方因素	3	1.84	772	0.55	3	9.66	2.68	56.76	3	5	14.6	B	IVF	0	0	0	0	0	0	0	是		未受精
1304	1	2018060027	解玲玲	≥35	41	3	刺激方案	1	408.333	≤10天	9	＞3000	3675	HCG	2	3	1	继发不孕	0.58	≤24	21.2	不明原因	3	11.38	769	0.69	3	14.96	6.73	96.43	4	6	7.1	B	IVF	3	0	2	1	0	0	0	否	否	全胚冷冻
1309	1	C00003404	王兆君	＜35	33	3	刺激方案	1	364.286	＞10天	14	＞3000	5100	HCG	4	1	0	继发不孕	0.22	≤24	22.4	女方因素	3	7.12	737	1.04	1	5.16	3.78	31	3	4	10.2	B-C	IVF	0	0	0	0	0	0	0	是		未受精
1315	1	C00008745	丁洁	＜35	30	2	降调节方案	3	293.75	＞10天	12	＞3000	3525	HCG	3	1	0	继发不孕	1.03	≤24	20.5	女方因素	3	0.69	723	0.36	2	8.59	3.45	62	3	6	1.08	A	IVF	0	0	0	0	0	0	0	是		无可移植胚胎
1324	1	C00018116	李晓	＜35	31	1	刺激方案	1	300	≤10天	8	≤3000	2400	HCG	3	0	0	原发不孕	1.26	＞24	27.9	女方因素	3	4.78	673.43	1.17	4	8.46	3.41	22.29	1	7	6.8	A-B	IVF	1	0	0	0	0	0	0	是		无可移植胚胎
1332	1	2017010026	陈娟	≥35	38	2	刺激方案	1	351.923	＞10天	13	＞3000	4575	HCG	2	1	1	继发不孕	2.02	＞24	29	男方因素	3	5.09	655	0.66	1	7.09	8.61	46.43	2	11	12.2	B	ICSI	1	0	1	1	1	1	0	否	是	移植	未妊娠
1333	1	C00017426	李双双	＜35	31	1	降调节方案	3	300	＞10天	13	＞3000	3900	HCG	6	0	0	原发不孕	0.87	≤24	21.6	女方因素	3	1.6	647.05	0.9	3	6.61	4.52	30	3	5	12.5	A	IVF	1	0	1	1	0	0	0	否	否	全胚冷冻
1334	1	2016070075	袁红彬	≥35	45	2	刺激方案	1	300	≤10天	5	≤3000	1500	HCG	5	6	1	继发不孕	0.20	＞24	24.4	混合因素	3	18.68	644	1.25	0	10.16	2.68	41	4	3	2.7			0	0	0	0	0	0	0	是		未取到卵
1337	1	2016070225	刘志莲	≥35	42	8	刺激方案	1	300	≤10天	8	≤3000	2400	HCG	16	0	0	原发不孕	1.5	＞24	25.5	女方因素	3	2	638	1.21	1	9.65	4.06	56	2	9	9	A	IVF	1	0	1	1	1	1	0	否	是	移植	未妊娠
1341	1	2018010072	张馨月	≥35	37	1	降调节方案	3	375	＞10天	12	＞3000	4500	HCG	3	1	0	继发不孕	0.54	＞24	25.3	女方因素	3	1.53	616	0.18	1	12.95	5.79	34.97	4	5	10.7	B	IVF	0	0	1	0	0	0	0	否	否	全胚冷冻
1342	1	2016120119	郝琳	＜35	33	1	刺激方案	1	318.75	≤10天	8	≤3000	2550	HCG	5	0	0	原发不孕	0.90	＞24	25.9	混合因素	3	16.85	615	0.5	#NULL!	8.05	2.31	78	3	6	11	A		0	0	0	0	0	0	0	是		未取卵
1348	1	2017090224	王帆	＜35	31	2	刺激方案	1	405	≤10天	5	≤3000	2025	HCG	6	1	1	继发不孕	2.47	＞24	25.7	女方因素	3	7.33	598	0.65	5	9.45	2.98	56	1	9	4.1	B	IVF	3	0	2	0	0	0	0	否	否	全胚冷冻
1349	1	2017120188	姜洪艳	≥35	35	1	刺激方案	1	300	≤10天	8	≤3000	2400	HCG	6	0	0	原发不孕	1.42	≤24	22.3	不明原因	3	10.2	592	1.12	4	7.53	2.72	65.76	2	6	5.5	B	IVF	1	0	2	0	0	0	0	否	否	全胚冷冻
1350	1	C00013423	周升花	≥35	49	2	拮抗剂方案	2	342.857	≤10天	7	≤3000	2400	HCG	4	1	1	继发不孕	0.54	≤24	23.3	男方因素	3	1.88	590	0.77	3	6.47	2.78	49	4	4	10	B	ICSI	3	0	0	0	0	0	0	是		无可移植胚胎
1352	1	C00004266	刘爽	＜35	33	1	降调节方案	3	356.25	≤10天	8	≤3000	2850	HCG	3	1	0	原发不孕	1.7	≤24	22	女方因素	3	0.47	573	0.31	2	9.03	2.15	30	1	10	10.4	A	IVF	0	0	0	0	0	0	0	是		无可移植胚胎
1359	1	C00017097	梁爽	＜35	32	1	降调节方案	3	313.333	＞10天	15	＞3000	4700	HCG	2	0	0	原发不孕	2.84	＞24	25.8	女方因素	3	0.83	551	0.83	1	7.24	3.82	25.4	1	11	15.3	A-B	IVF	1	0	0	0	0	0	0	是		无可移植胚胎
1360	1	2018050022	徐春红	≥35	43	1	降调节方案	3	375	≤10天	10	＞3000	3750	HCG	1	2	1	继发不孕	0.95	＞24	29.8	女方因素	3	0.4	550	0.54	3	13.7	4.68	66.06	4	7	10.7	B	IVF	1	0	1	0	1	1	0	否	是	移植	未妊娠
1362	1	2018010171	薛广华	≥35	38	3	刺激方案	1	300	≤10天	6	≤3000	1800	HCG	3	2	0	继发不孕	0.45	＞24	28	不明原因	3	2.25	544	0.43	3	8.15	2.04	34.56	4	5	11.7	B	IVF	3	0	2	1	2	2	0	否	是	移植	已妊娠	临床妊娠	宫内妊娠	单胎宫内妊娠
1364	1	C00018381	王艳	≥35	35	1	拮抗剂方案	2	347.727	＞10天	11	＞3000	3825	HCG	3	0	0	原发不孕	0.19	＞24	26	混合因素	3	0.9	534.17	1.08	3	7.15	3.98	59.09	4	7	10.1	B	ICSI	3	0	2	0	2	2	0	否	是	移植	未妊娠
1366	1	C00003637	陆田田	≥35	37	5	降调节方案	3	325	＞10天	13	＞3000	4225	HCG	3	1	0	继发不孕	1.29	＞24	28.6	混合因素	3	0.92	516	0.39	2	8.76	6.7	38	2	6	14.8	B	ICSI	3	0	2	1	2	2	0	否	是	移植	已妊娠	临床妊娠	宫内妊娠	单胎宫内妊娠
1367	1	C00014253	朱伟琴	＜35	33	1	拮抗剂方案	2	375	≤10天	5	≤3000	1875	HCG	2	3	1	继发不孕	1.5	＞24	26.4	女方因素	3	2.43	516	0.64	3	11.54	3.56	31	1	6	1.06	B	IVF	3	0	3	2	0	0	0	否	否	全胚冷冻
1371	1	2018050027	狄冉	≥35	41	2	降调节方案	3	432.143	＞10天	14	＞3000	6050	HCG	1	3	1	继发不孕	1.9	＞24	26	女方因素	3	0.59	486	0.42	2	13.02	5.65	40	2	11	9.7	B-C	IVF	1	0	0	0	0	0	0	是		无可移植胚胎
1376	1	2016120124	张兰	≥35	40	2	刺激方案	1	300	≤10天	7	≤3000	2100	HCG	17	0	0	原发不孕	2.49	≤24	19.5	混合因素	3	7.49	437	0.69	3	8.18	4.97	73.7	2	10	10	B	ICSI	1	0	1	0	1	1	0	否	是	移植	未妊娠
1380	1	2017090005	周俊平	＜35	34	3	刺激方案	1	300	＞10天	15	＞3000	4500	HCG	10	0	0	原发不孕	0.58	＞24	25.7	女方因素	3	1.55	630	1.34	3	16.18	8.18	86.73	3	5	11.2	B	IVF	2	0	2	0	1	1	0	否	是	移植	已妊娠	临床妊娠	宫内妊娠	单胚胎停
1382	1	C00017378	张艳	≥35	40	2	拮抗剂方案	2	331.25	＞10天	12	＞3000	3975	HCG	4	1	1	继发不孕	0.7	＞24	27.5	男方因素	3	2.1	526	0.44	2	9.36	6.34	42	4	5	10	A	ICSI	2	0	2	2	2	2	0	否	是	移植	已妊娠	临床妊娠	宫内妊娠	单胚胎停
1384	1	2016040224	党迎迎	＜35	33	1	降调节方案	3	375	＞10天	13	＞3000	4875	HCG	7	0	0	原发不孕	2.72	＞24	35.4	女方因素	3	0.98	896	0.52	6	8.16	3.28	57	1	12	9	B	IVF	4	0	3	1	2	2	0	否	是	移植	未妊娠
1386	1	C00010258	胡建琳	≥35	43	1	降调节方案	3	401.786	＞10天	14	＞3000	5625	HCG	1	5	2	继发不孕	3.08	≤24	20.7	女方因素	3	2.55	911	0.71	4	7.7	9.92	38.33	2	9	0.84	A-B	IVF	2	0	2	2	2	2	0	否	是	移植	已妊娠	临床妊娠	宫内妊娠	单胚胎停
1387	1	C00019469	谢玲燕	≥35	41	1	刺激方案	1	300	≤10天	9	≤3000	2700	HCG	3	0	0	原发不孕	1.62	≤24	17	女方因素	3	24.38	910	1.68	6	10.18	7.27	55.42	2	10	6.4	B-C	IVF	1	0	1	0	0	0	0	否	否	全胚冷冻
1388	1	C00011770	李林	≥35	35	1	刺激方案	1	400	≤10天	7	≤3000	2800	HCG	1	0	0	原发不孕	1.33	≤24	22.6	女方因素	3	6.14	907	0.76	5	5.64	2.11	21	2	11	0.6	B	IVF	1	0	2	0	0	0	0	否	否	全胚冷冻
1393	1	C00012356	高琳琳	≥35	37	5	刺激方案	1	300	＞10天	11	＞3000	3300	HCG	5	0	0	原发不孕	0.21	≤24	23.2	女方因素	3	13.52	903	1.19	2	16.59	5.61	20	4	4	0.47	B	IVF	1	0	0	0	0	0	0	是		无可移植胚胎
1400	1	C00010436	史建叶	≥35	38	3	刺激方案	1	450	＞10天	11	＞3000	4950	HCG	1	3	0	继发不孕	0.42	≤24	23.3	女方因素	3	23.17	884	1.42	1	7.01	3.39	46.81	4	5	0.45	B	IVF	1	0	1	0	0	0	0	否	否	全胚冷冻
1403	1	C00006379	党玉霞	≥35	44	4	拮抗剂方案	2	416.667	≤10天	9	＞3000	3750	双扳机	5	0	0	原发不孕	2.72	≤24	22.3	混合因素	3	1.83	882	0.97	5	12.34	4.35	60	2	10	0.91	A	ICSI	3	0	2	2	0	0	0	否	否	全胚冷冻
1404	1	C00003939	沈平平	≥35	39	1	降调节方案	3	409.091	＞10天	11	＞3000	4500	HCG	1	2	1	继发不孕	1.79	≤24	21.5	混合因素	3	1.79	877.05	0.64	6	8.2	6.99	22.13	2	14	13	A	ICSI	2	0	1	0	1	1	0	否	是	移植	未妊娠
1405	1	2016040183	刘宝桂	≥35	44	1	降调节方案	3	396.429	＞10天	14	＞3000	5550	HCG	12	1	1	继发不孕	0.86	＞24	24.4	女方因素	3	2.96	876	1	2	8.84	3.17	54	4	7	15.6	A-B	IVF	1	0	1	0	0	0	0	否	否	全胚冷冻
1409	1	C00016349	董福香	≥35	37	1	降调节方案	3	367.308	＞10天	13	＞3000	4775	HCG	5	3	1	继发不孕	3.03	＞24	24.6	女方因素	3	1.57	866.61	1.26	4	7.47	6.04	56.76	2	8	10.3	A-B	IVF	1	0	1	1	0	0	0	否	否	全胚冷冻
1410	1	C00012593	周静	≥35	48	4	拮抗剂方案	2	290.625	≤10天	8	≤3000	2325	双扳机	8	3	0	继发不孕	0.83	≤24	19.5	女方因素	3	5.3	860	0.68	2	9.73	5.54	37	4	7	8.6	B	IVF	0	0	0	0	0	0	0	是		无可移植胚胎
1411	1	2017090115	张慧	≥35	42	4	刺激方案	1	375	≤10天	10	＞3000	3750	HCG	5	2	1	继发不孕	0.91	≤24	20.2	女方因素	3	16.32	858	1.21	4	11.83	6.78	78.43	4	5	4.6	A	IVF	3	0	2	0	0	0	0	否	否	全胚冷冻
1413	1	C00013299	王鑫	≥35	36	1	刺激方案	1	300	≤10天	9	≤3000	2700	HCG	11	1	0	继发不孕	1.53	≤24	19.1	女方因素	3	4.54	856	1.14	1	9.74	3.25	71	2	6	1.33	A	IVF	1	0	1	0	1	1	0	否	是	移植	未妊娠
1415	1	2016100159	王允花	＜35	29	2	降调节方案	3	300	≤10天	10	≤3000	3000	HCG	4	2	1	继发不孕	1.05	≤24	23.4	女方因素	3	0.66	853	0.8	3	11.29	7.14	32.76	3	7	10.5	A-B	IVF	1	0	1	0	1	1	0	否	是	移植	未妊娠
1419	1	2016090021	艾春丽	≥35	39	1	刺激方案	1	300	＞10天	11	＞3000	3300	HCG	2	3	2	继发不孕	0.89	＞24	24.4	女方因素	3	2.16	829	1.27	4	17.09	5.42	41	4	4	7.7	A-B	IVF	1	0	1	0	0	0	0	否	否	全胚冷冻
1420	1	2016060207	姜丽	≥35	35	1	降调节方案	3	392.857	≤10天	7	≤3000	2750	HCG	5	5	1	继发不孕	1.43	≤24	22.8	女方因素	3	10.36	981	0.87	3	6.15	4.66	40	2	8	8.8	A	IVF	2	0	2	0	2	2	0	否	是	移植	未妊娠
1422	1	C00016055	罗玉林	≥35	40	3	拮抗剂方案	2	356.25	＞10天	12	＞3000	4275	HCG	2	4	1	继发不孕	0.87	≤24	23	混合因素	3	4.77	974	0.87	5	8.61	3.38	40.09	4	5	#NULL!		ICSI	5	0	2	0	2	2	0	否	是	移植	已妊娠	临床妊娠	宫内妊娠	单胎宫内妊娠
1423	1	2017040104	张利	≥35	40	2	拮抗剂方案	2	333.333	≤10天	9	≤3000	3000	HCG	1	1	1	继发不孕	0.96	≤24	22	混合因素	3	9.57	973	1.39	1	16.56	7.4	56.39	4	5	11.8	B	ICSI	1	0	0	0	0	0	0	是		无可移植胚胎
1426	1	2017040004	王国娟	＜35	28	1	降调节方案	3	312.5	＞10天	12	＞3000	3750	HCG	5	1	0	继发不孕	1.78	≤24	23.7	女方因素	3	2.5	969	1.31	5	9.15	5.39	56.76	1	8	13	A	IVF	3	0	0	0	0	0	0	是		无可移植胚胎
1428	1	C00017189	梁冬妍	≥35	42	1	拮抗剂方案	2	290.625	≤10天	8	≤3000	2325	HCG	18	1	0	继发不孕	1.83	≤24	21.3	混合因素	3	1.74	965	0.97	7	7.42	3.89	36	2	9	13.7	A-B	ICSI	4	0	2	2	2	2	0	否	是	移植	未妊娠
1431	1	C00010756	赵玉香	≥35	46	1	刺激方案	1	300	≤10天	10	≤3000	3000	HCG	11	4	1	继发不孕	0.54	≤24	23.3	混合因素	3	23.79	955	8.79	0	14.26	2.43	34	4	4	5.6	B		0	0	0	0	0	0	0	是		未取到卵
1433	1	2016100165	王凤杰	≥35	39	3	降调节方案	3	513.462	＞10天	13	＞3000	6675	HCG	6	1	1	继发不孕	0.46	≤24	22.6	混合因素	3	4.49	945	1.27	2	7	4.87	41.75	4	3	8.3	C	ICSI	1	0	0	0	0	0	0	是		无可移植胚胎
1439	1	2017030206	李秋芳	≥35	39	1	降调节方案	3	368.75	＞10天	12	＞3000	4425	HCG	1	2	1	继发不孕	0.77	≤24	20.1	女方因素	3	6.47	930	1.41	4	9.59	4.79	40	4	7	7.8	A	IVF	1	0	0	0	0	0	0	是		无可移植胚胎
1440	1	2016030163	刘冬梅	≥35	40	2	降调节方案	3	472.222	≤10天	9	＞3000	4250	HCG	1	2	1	继发不孕	0.74	≤24	22	男方因素	3	8.97	926	0.8	4	10.85	6.4	49.86	4	6	10.7	A	ICSI	3	0	2	1	0	0	0	否	否	全胚冷冻
1441	1	2016100227	郭璟	≥35	41	1	降调节方案	3	328.125	≤10天	8	≤3000	2625	HCG	5	1	1	继发不孕	0.78	≤24	20.2	混合因素	3	12.88	926	1.05	2	9.7	3.83	93.36	4	5	7.8	A	ICSI	1	0	1	0	0	0	0	否	否	全胚冷冻
1443	1	2016100067	殷庆瑞	≥35	39	2	降调节方案	3	450	≤10天	9	＞3000	4050	HCG	14	0	0	原发不孕	1.49	≤24	21.6	混合因素	3	7.65	913	0.79	3	7.21	4.18	69.73	2	8	13.1	B	ICSI	4	0	2	1	2	2	0	否	是	移植	已妊娠	临床妊娠	宫内妊娠	双胎胎停
1447	1	2016080236	赵佳	≥35	35	2	降调节方案	3	328.125	≤10天	8	≤3000	2625	HCG	9	2	0	继发不孕	1.55	＞24	24.3	男方因素	3	5.34	907	0.38	4	7.06	5.46	80.74	2	8	11	B	ICSI	4	0	2	1	0	0	0	否	否	全胚冷冻
1449	1	2016070177	赵健玲	≥35	41	1	刺激方案	1	300	≤10天	9	≤3000	2700	HCG	3	1	1	继发不孕	0.4	＞24	26.3	女方因素	3	3.81	904	1.49	3	8.2	3.6	59.09	4	7	8.6	A	IVF	0	0	0	0	0	0	0	是		无可移植胚胎
1461	1	C00005229	贺倩倩	＜35	27	2	拮抗剂方案	2	485.714	≤10天	7	＞3000	3400	HCG	1	0	0	原发不孕	1.8	≤24	23.7	混合因素	3	5.96	961	1.71	5	15.2	4.95	76.46	1	6	13.2	A-B	ICSI	4	0	2	2	2	2	0	否	是	移植	已妊娠	临床妊娠	宫内妊娠	单胎宫内妊娠
1462	1	C00013829	臧红梅	≥35	39	1	降调节方案	3	315.625	＞10天	12	＞3000	3787.5	HCG	7	3	0	继发不孕	0.22	≤24	22.8	女方因素	3	3.21	961	1.24	4	9.94	4.34	22	4	6	12.5	A-B	IVF	4	0	2	2	2	2	0	否	是	移植	未妊娠
1465	1	2018050217	李莉萍	≥35	35	3	降调节方案	3	381.25	＞10天	12	＞3000	4575	HCG	4	2	1	继发不孕	1.94	≤24	19.2	男方因素	3	0.63	957	1.32	3	8.66	8.23	43.5	2	9	7.5	A	ICSI	3	0	3	1	2	2	0	否	否	全胚冷冻
1469	1	2018040065	左云芳	≥35	47	7	刺激方案	1	375	≤10天	9	＞3000	3375	HCG	3	3	1	继发不孕	0.89	≤24	22.1	女方因素	3	12.35	948	1.01	2	19.78	6.22	40.37	4	2	4.2	C	IVF	0	0	1	0	0	0	0	否	否	全胚冷冻
1471	1	C00011987	任淑青	≥35	47	2	拮抗剂方案	2	450	＞10天	13	＞3000	5850	HCG	1	5	1	继发不孕	0.57	≤24	22.6	女方因素	3	20.38	928	0.68	1	13.18	5.72	86	4	6	7.2	A	IVF	1	0	1	0	1	1	0	否	是	移植	未妊娠
1475	1	2016030237	吴香云	≥35	40	5	拮抗剂方案	2	450	≤10天	9	＞3000	4050	HCG	14	1	0	继发不孕	0.67	≤24	23.6	女方因素	3	2.17	886	1.39	3	9.89	3.5	35.23	4	5	9.6	A	IVF	3	0	1	1	1	1	0	否	是	移植	未妊娠
1476	1	2016080240	尹芳	＜35	32	8	刺激方案	1	300	≤10天	7	≤3000	2100	HCG	2	1	0	继发不孕	0.77	≤24	20.5	女方因素	3	9.28	885	2.11	3	9.9	3.75	89	3	4	4.3	A	IVF	1	0	0	0	0	0	0	是		无可移植胚胎
1478	1	2018040190	杨凤	≥35	44	1	拮抗剂方案	2	466.071	＞10天	14	＞3000	6525	HCG	1	1	1	继发不孕	0.31	＞24	24.4	混合因素	3	1.51	877	1.33	3	11.26	2.94	95.42	4	4	9.8	A	ICSI	3	0	2	1	0	0	0	否	否	全胚冷冻
1481	1	C00004966	张金玲	≥35	41	4	拮抗剂方案	2	294.231	＞10天	13	＞3000	3825	双扳机	2	2	1	继发不孕	2.340	≤24	21.5	女方因素	3	4.81	860	0.71	4	10.05	4.69	33.7	2	8	9.8	B	IVF	2	0	2	1	0	0	0	否	否	全胚冷冻
1483	1	C00017408	刘霞	≥35	43	1	刺激方案	1	300	≤10天	7	≤3000	2100	HCG	9	2	1	继发不孕	0.19	≤24	22.6	女方因素	3	14.05	854	1.42	0	12.91	7.74	46.98	4	5	6.1	A-B		0	0	0	0	0	0	0	是		未取到卵
1484	1	C00012480	张克彩	≥35	38	2	刺激方案	1	300	≤10天	7	≤3000	2100	HCG	1	2	1	继发不孕	1.3	＞24	28.8	女方因素	3	9.14	844.63	0.66	5	6.01	4.61	41	2	9	0.57	A-B	IVF	2	0	0	0	0	0	0	是		无可移植胚胎
1486	1	C00011756	陈义花	＜35	28	1	刺激方案	1	300	≤10天	10	≤3000	3000	HCG	3	0	0	原发不孕	1.26	≤24	21.3	女方因素	3	31.49	831	1.81	2	6.58	6.67	46.98	1	6	0.44	A	IVF	0	0	0	0	0	0	0	是		无可移植胚胎
1490	1	C00003721	卓延飞	＜35	29	2	刺激方案	1	429.545	＞10天	11	＞3000	4725	HCG	1	1	0	继发不孕	1.42	≤24	18.4	女方因素	3	19.42	811	1.69	2	12.55	5.32	30.74	1	6	5	B	IVF	2	0	2	0	0	0	0	否	否	全胚冷冻
1491	1	2016050047	王允花	＜35	29	1	降调节方案	3	450	≤10天	9	＞3000	4050	HCG	4	2	1	继发不孕	1.62	≤24	23.4	女方因素	3	1.24	805	0.66	3	11.29	7.14	42	1	7	12	A	IVF	3	0	2	0	2	2	0	否	是	移植	未妊娠
1492	1	C00010134	陈慧勤	＜35	31	1	拮抗剂方案	2	500	＞10天	15	＞3000	7500	双扳机	1	0	0	原发不孕	1.1	≤24	23.4	女方因素	3	1.04	804	0.39	4	6.79	3.57	38	3	7	14	B	IVF	2	0	1	1	1	1	0	否	是	移植	未妊娠
1493	1	2016100059	孙姣姣	＜35	29	2	降调节方案	3	322.5	≤10天	10	＞3000	3225	HCG	6	0	0	原发不孕	1.42	≤24	21.4	男方因素	3	1.75	798	2.47	3	5.78	6.22	40.37	1	12	12	A	ICSI	1	0	1	1	1	1	0	否	是	移植	未妊娠
1494	1	2016030230	刘国红	≥35	40	1	刺激方案	1	318.182	＞10天	11	＞3000	3500	HCG	2	2	0	继发不孕	0.19	≤24	21.6	女方因素	3	18	968	1.97	2	11.26	4.15	45	4	4	4.3	B	IVF	1	0	1	0	0	0	0	否	否	全胚冷冻
1495	1	C00012040	贺晓方	≥35	39	1	刺激方案	1	300	≤10天	10	≤3000	3000	HCG	9	0	0	原发不孕	0.01	≤24	20.7	女方因素	3	26.69	968	0.92	1	12.8	4.49	41	4	3	0.46	B	IVF	0	0	0	0	0	0	0	是		无可移植胚胎
1497	1	C00011351	高世芹	≥35	40	2	刺激方案	1	300	≤10天	10	≤3000	3000	HCG	4	1	0	继发不孕	0.56	≤24	21	混合因素	3	9.45	961	1.23	4	10.09	5.42	41	4	6	0.5	B	ICSI	2	0	1	0	0	0	0	否	否	全胚冷冻
1505	1	C00018991	蔡燕	≥35	43	1	拮抗剂方案	2	450	≤10天	9	＞3000	4050	HCG	4	1	1	继发不孕	0.22	≤24	20.2	女方因素	3	2.64	934	0.5	3	12.49	2.07	52.55	4	8	10	A	IVF	1	0	1	0	1	1	0	否	是	移植	未妊娠
1506	1	2016050021	王凤	＜35	33	3	降调节方案	3	381.25	＞10天	12	＞3000	4575	HCG	5	0	0	原发不孕	2.78	≤24	19.5	女方因素	3	3.95	928	1.33	3	12.9	4.89	86.43	1	10	14.5	A-B	IVF	1	0	2	0	2	2	0	否	是	移植	未妊娠
1511	1	C00008139	张美玲	≥35	46	1	拮抗剂方案	2	375	≤10天	9	＞3000	3375	HCG	2	6	1	继发不孕	0.17	≤24	23.9	女方因素	3	12.05	885	0.63	2	17.12	9.91	53	4	5	0.64	A-B	IVF	1	0	0	0	0	0	0	是		无可移植胚胎
1517	1	2016020136	万连艳	≥35	40	1	刺激方案	1	347.727	＞10天	11	＞3000	3825	HCG	18	0	0	原发不孕	1.85	＞24	25.6	女方因素	3	4.44	854.39	1.48	6	10.57	4.61	15	2	10	13.3	A	IVF	4	0	2	0	2	2	0	否	是	移植	未妊娠
1518	1	C00009358	邢秋菊	≥35	39	1	拮抗剂方案	2	356.25	＞10天	12	＞3000	4275	HCG	1	4	1	继发不孕	0.85	≤24	21.1	女方因素	3	7.22	854	0.85	3	5.24	7.22	34.66	4	7	9.6	A	IVF	2	0	2	2	2	2	0	否	是	移植	已妊娠	临床妊娠	宫内妊娠	单胎宫内妊娠
1526	1	2016120202	耿洁	≥35	41	5	降调节方案	3	325	＞10天	12	＞3000	3900	HCG	8	1	0	继发不孕	1.7	＞24	28.1	女方因素	3	3.7	805	0.68	3	9.32	2.9	25	2	9	8.8	A	IVF	3	0	0	0	0	0	0	是		无可移植胚胎
1527	1	C00012703	邢芸	＜35	30	4	刺激方案	1	356.25	≤10天	8	≤3000	2850	HCG	3	1	1	继发不孕	2.76	≤24	21.5	男方因素	3	3.86	804	1.19	3	7.55	5	40	1	12	0.62	B	ICSI	2	0	1	0	0	0	0	否	否	全胚冷冻
1531	1	2017040092	李现敬	≥35	35	1	降调节方案	3	300	＞10天	11	＞3000	3300	HCG	6	4	1	继发不孕	1.29	＞24	25	女方因素	3	2.92	1233	1.12	4	6.3	4.6	50.46	2	9	13.6	A-B	IVF	3	0	2	1	2	2	0	否	是	移植	已妊娠	临床妊娠	宫内妊娠	双胎宫内妊娠
1537	1	2017090211	姜金玲	≥35	42	1	拮抗剂方案	2	300	≤10天	7	≤3000	2100	HCG	1	2	1	继发不孕	0.92	≤24	20.3	男方因素	3	5.87	1189	0.52	2	9.59	4.55	52.32	4	6	11.8	A	ICSI	2	1	1	0	0	0	0	否	否	全胚冷冻
1541	1	C00012825	陈普杰	＜35	34	2	拮抗剂方案	2	318.75	＞10天	12	＞3000	3825	HCG	4	1	1	继发不孕	1.61	≤24	20	混合因素	3	0.65	1173	1.38	4	9.31	5.19	26	1	6	8.7	A	ICSI	3	0	3	0	2	2	0	否	是	移植	未妊娠
1544	1	C00007191	徐婷婷	＜35	32	1	拮抗剂方案	2	358.333	≤10天	9	＞3000	3225	HCG	3	0	0	原发不孕	1.57	≤24	21.5	不明原因	3	1.04	1170	0.69	5	6.33	5.46	38	1	11	13.3	A	IVF	3	0	2	0	1	1	0	否	是	移植	未妊娠
1545	1	C00010066	于欣	≥35	41	1	降调节方案	3	400	≤10天	9	＞3000	3600	HCG	4	4	1	继发不孕	1.44	＞24	24.2	女方因素	3	5.3	1170	0.53	5	10.53	4.08	58	2	8	0.84	A-B	IVF	2	1	2	1	0	0	0	否	否	全胚冷冻
1550	1	C00012315	刘绍美	≥35	41	2	拮抗剂方案	2	312.5	≤10天	8	≤3000	2500	HCG	1	1	1	继发不孕	1.36	≤24	23.8	混合因素	3	2.53	1153	1.45	4	4.98	6.46	34.5	2	20	0.99	A	ICSI	2	0	2	0	2	2	0	否	是	移植	已妊娠	临床妊娠	宫内妊娠	单胚胎停
1553	1	2018010154	张慧	≥35	42	5	刺激方案	1	293.75	＞10天	12	＞3000	3525	HCG	5	2	1	继发不孕	0.14	≤24	20.2	女方因素	3	26.32	1148	1.05	2	11.83	6.78	66.43	4	4	5.5	A	IVF	1	0	0	0	0	0	0	是		无可移植胚胎
1555	1	2016120216	孙敏	＜35	33	1	刺激方案	1	375	≤10天	8	≤3000	3000	HCG	3	1	0	继发不孕	1.28	≤24	19.4	女方因素	3	2.64	1147	1.04	3	10.2	3.98	40	1	6	11.4	A	IVF	1	0	0	0	0	0	0	是		无可移植胚胎
1557	1	C00015054	李娟华	≥35	35	1	刺激方案	1	343.75	＞10天	12	＞3000	4125	HCG	4	4	0	继发不孕	1.42	＞24	25.1	女方因素	3	16.26	1141	1.59	3	11.29	7.11	33	2	11	0.7	A	IVF	1	0	1	0	0	0	0	否	否	全胚冷冻
1558	1	C00012492	蔺爱	＜35	34	1	拮抗剂方案	2	291.667	≤10天	9	≤3000	2625	HCG	3	3	1	继发不孕	1.48	≤24	18	女方因素	3	5.18	1137	0.73	4	7.3	4.15	49.09	1	9	1.12	A	IVF	3	0	2	1	1	1	0	否	是	移植	未妊娠
1559	1	C00012967	李素霞	＜35	34	1	拮抗剂方案	2	320.833	≤10天	9	≤3000	2887.5	HCG	10	1	1	继发不孕	1.48	＞24	27.3	女方因素	3	5.47	1136	0.95	4	7.42	4.99	61	1	9	152	B	IVF	0	0	0	0	0	0	0	是		无可移植胚胎
1566	1	C00011962	沈彤	＜35	33	1	刺激方案	1	345	＞10天	20	＞3000	6900	HCG	9	2	0	原发不孕	0.89	＞24	24.2	不明原因	3	18.54	1097	0.79	2	16.79	4.36	14	3	4	7.1	B	ICSI	2	0	2	0	2	2	0	否	是	移植	未妊娠
1568	1	2016030074	李学松	＜35	32	1	降调节方案	3	321.429	≤10天	7	≤3000	2250	HCG	4	1	0	继发不孕	2.18	＞24	25.3	女方因素	3	7.75	1084	0.83	3	6.5	3	18	1	8	10.4	A-B	IVF	0	0	0	0	0	0	0	是		未受精
1569	1	C00006730	秦红艳	≥35	38	1	拮抗剂方案	2	375	≤10天	9	＞3000	3375	HCG	4	0	0	原发不孕	1.73	≤24	23.6	女方因素	3	10.73	1082	0.89	4	6.86	5.86	41	2	11	17	B	IVF	4	0	0	0	0	0	0	是		无可移植胚胎
1576	1	C00012984	刘静	≥35	40	5	降调节方案	3	300	≤10天	8	≤3000	2400	HCG	6	2	1	继发不孕	1.03	≤24	20.2	女方因素	3	1.93	1064	2.38	3	6.98	3.71	38	4	7	10	B	IVF	1	0	1	1	0	0	0	否	否	全胚冷冻
1582	1	2016030047	王传冬	≥35	42	1	刺激方案	1	300	≤10天	10	≤3000	3000	HCG	2	4	1	继发不孕	0.64	＞24	25.4	混合因素	3	8.43	1042	1.76	3	12.89	6.72	25.52	4	5	6.1	B	ICSI	2	0	2	0	0	0	0	否	否	全胚冷冻
1584	1	C00010956	李玲玲	＜35	32	3	刺激方案	1	450	≤10天	10	＞3000	4500	HCG	2	0	0	继发不孕	1.1	≤24	23.7	女方因素	3	2.82	1040	0.51	2	7.34	6.5	30.87	3	6	1.07	B	IVF	2	0	0	0	0	0	0	是		无可移植胚胎
1585	1	2017040155	侯东红	≥35	44	2	拮抗剂方案	2	400	≤10天	5	≤3000	2000	HCG	1	4	1	继发不孕	0.28	＞24	24.2	混合因素	3	12.29	1038	0.64	3	7.43	5.26	38	4	5	8.1	A	ICSI	2	0	2	2	0	0	0	否	否	全胚冷冻
1587	1	C00010094	乔秀颐	≥35	39	1	拮抗剂方案	2	335	≤10天	10	＞3000	3350	HCG	1	0	0	原发不孕	1.28	≤24	20.4	女方因素	3	1.83	1034	0.38	3	6.77	2.21	73	2	9	9.8	A	IVF	3	0	2	0	0	0	0	否	否	全胚冷冻
1590	1	2016080160	李涵	＜35	32	1	刺激方案	1	450	＞10天	12	＞3000	5400	HCG	6	0	0	原发不孕	1.02	＞24	25.7	女方因素	3	3.54	1026	1.63	5	10.7	4.36	87.09	3	7	10.5	A	IVF	3	0	1	0	1	1	0	否	是	移植	未妊娠
1591	1	2017050190	侯艳艳	＜35	33	1	刺激方案	1	345	≤10天	10	＞3000	3450	HCG	6	0	0	原发不孕	2.48	≤24	23.8	女方因素	3	3.43	1025	1.57	2	6.63	4.86	37	1	8	10.7	A-B	IVF	1	0	1	0	1	1	0	否	是	移植	已妊娠	生化妊娠	生化妊娠	生化妊娠
1593	1	C00010110	刘静静	＜35	28	1	拮抗剂方案	2	295	＞10天	15	＞3000	4425	双扳机	6	0	0	原发不孕	2.32	≤24	20.7	女方因素	3	6.2	1013	0.51	2	14.93	4.58	52	1	8	14.5	A	IVF	1	0	0	0	0	0	0	是		无可移植胚胎
1596	1	2018060051	马爱君	≥35	49	1	刺激方案	1	358.333	≤10天	9	＞3000	3225	HCG	3	2	1	继发不孕	0.48	≤24	22	女方因素	3	0.37	932	0.79	3	6.7	3.88	44.67	4	4	6.9	B-C	IVF	2	0	0	0	0	0	0	是		无可移植胚胎
1597	1	C00018677	李新文	＜35	32	7	刺激方案	1	450	≤10天	8	＞3000	3600	HCG	3	0	0	原发不孕	2.1	≤24	21.8	混合因素	3	3.63	918	1.27	3	11.62	4.58	71	1	9	6.3	B	ICSI	1	0	1	1	0	0	0	否	否	全胚冷冻
1600	1	C00008195	汪芳	＜35	31	1	刺激方案	1	375	≤10天	10	＞3000	3750	HCG	2	1	0	继发不孕	1.78	≤24	19	男方因素	3	5.67	912	0.79	2	7.24	3.66	26	1	7	4.1	A	ICSI	1	0	1	1	0	0	0	否	否	全胚冷冻
1603	1	C00016603	刘雪娇	≥35	36	1	刺激方案	1	300	≤10天	9	≤3000	2700	HCG	6	0	0	原发不孕	1.67	≤24	18.4	女方因素	2	13.57	997.65	1.35	2	6.82	2.88	73	2	7	6.8	A-B	IVF	0	0	0	0	0	0	0	是		无可移植胚胎
1605	1	C00003918	张玉爱	≥35	44	2	刺激方案	1	300	≤10天	8	≤3000	2400	HCG	9	2	1	继发不孕	0.61	＞24	26.7	混合因素	2	8.63	994	0.76	0	12.72	4.7	31	4	6	5	A		0	0	0	0	0	0	0	是		未取到卵
1607	1	2018040014	李玲	≥35	41	1	拮抗剂方案	2	418.421	＞10天	19	＞3000	7950	双扳机	3	3	1	继发不孕	2.24	＞24	24.7	混合因素	2	10.2	990	0.67	3	12.65	4.81	57.66	2	9	12	A	ICSI	2	0	1	1	0	0	0	否	否	全胚冷冻
1612	1	C00014735	高琳琳	≥35	37	6	刺激方案	1	450	＞10天	12	＞3000	5400	HCG	5	0	0	原发不孕	0.41	≤24	23.2	女方因素	2	27.4	979	1.77	1	16.59	5.61	20	4	5	0.49	B	IVF	1	0	1	1	0	0	0	否	否	全胚冷冻
1617	1	2016060186	肖秀红	≥35	43	1	刺激方案	1	347.727	＞10天	11	＞3000	3825	HCG	6	0	0	继发不孕	0.45	≤24	22.6	女方因素	2	6.14	961	1.23	2	6.45	5.86	32.76	4	6	8	A-B	IVF	2	0	2	2	2	2	0	否	是	移植	已妊娠	临床妊娠	宫内妊娠	单胎宫内妊娠
1619	1	2016110084	于静	≥35	35	1	降调节方案	3	425	≤10天	9	＞3000	3825	HCG	1	0	0	原发不孕	2.08	≤24	23.6	混合因素	2	9.43	951	0.44	4	8.93	2.69	41.75	2	10	11.5	A	ICSI	3	0	0	0	0	0	0	是		无可移植胚胎
1624	1	C00011858	王慧君	≥35	47	1	刺激方案	1	387.5	≤10天	6	≤3000	2325	HCG	3	1	1	原发不孕	0.47	≤24	24	女方因素	2	3.64	937	0.57	2	13.32	4.74	56	4	6	0.6	A-B	IVF	1	0	1	0	0	0	0	否	否	全胚冷冻
1625	1	C00004551	王南南	≥35	40	3	降调节方案	3	375	＞10天	11	＞3000	4125	HCG	14	0	0	原发不孕	0.82	≤24	19.8	男方因素	2	7.95	934	0.83	3	9.71	3.92	83.77	4	5	8.7	A	ICSI	3	0	3	2	2	2	0	否	是	移植	未妊娠
1628	1	2018030130	王南南	≥35	40	2	拮抗剂方案	2	560.714	＞10天	14	＞3000	7850	HCG	14	0	0	原发不孕	0.95	≤24	19.8	女方因素	2	6.25	918	1.13	3	9.71	3.92	73.77	4	5	11.6	A	IVF	3	0	1	0	0	0	0	否	否	全胚冷冻
1631	1	2016080070	崔晶	＜35	34	1	刺激方案	1	375	≤10天	6	≤3000	2250	HCG	4	0	0	原发不孕	0.54	＞24	28	女方因素	2	0.89	910	1.01	0	14.52	6.45	57	3	3	9.8	A-B		0	0	0	0	0	0	0	是		未取到卵
1636	1	C00016425	吕桂霞	≥35	39	2	降调节方案	3	328.846	＞10天	13	＞3000	4275	HCG	4	3	1	继发不孕	0.28	≤24	21.3	女方因素	2	1.1	896	0.23	3	14.87	5.25	23	4	7	9.1	B	IVF	1	0	1	0	1	1	0	否	是	移植	未妊娠
1638	1	C00006760	刘静	≥35	39	4	降调节方案	3	292.5	≤10天	10	≤3000	2925	HCG	5	2	1	继发不孕	0.99	≤24	20.2	女方因素	2	1.42	890	2.24	2	6.98	3.71	38	4	6	0.97	B	IVF	2	0	2	2	0	0	0	否	否	全胚冷冻
1639	1	C00004501	文风花	≥35	48	1	刺激方案	1	375	≤10天	9	＞3000	3375	HCG	2	3	2	继发不孕	0.32	＞24	25	女方因素	2	4.34	890	2.82	2	8.69	2.52	35.23	4	4	0.84	B	IVF	2	0	1	0	0	0	0	否	否	全胚冷冻
1640	1	C00005852	贾兰	≥35	43	1	拮抗剂方案	2	300	≤10天	7	≤3000	2100	双扳机	11	3	1	继发不孕	1.12	≤24	20.8	女方因素	2	4.29	889	0.32	2	5.44	3.36	10	4	6	10.4	A	IVF	1	0	1	0	1	1	0	否	是	移植	未妊娠
1644	1	C00010567	王文平	≥35	39	1	拮抗剂方案	2	364.286	≤10天	7	≤3000	2550	HCG	0	1	0	继发不孕	0.14	≤24	20.1	女方因素	2	5.17	883	1.46	3	8.6	3.81	63	4	6	5.7	A	IVF	2	0	2	2	2	2	0	否	是	移植	未妊娠
1652	1	C00016877	于杨	＜35	33	1	刺激方案	1	400	≤10天	9	＞3000	3600	HCG	3	1	0	继发不孕	1.43	≤24	20.5	女方因素	2	7.93	857	1.21	1	11	3.5	55	1	9	0.91	B	IVF	0	0	0	0	0	0	0	是		无可移植胚胎
1653	1	C00012086	李邦洪	≥35	44	1	拮抗剂方案	2	345	≤10天	10	＞3000	3450	HCG	1	2	2	继发不孕	0.5	＞24	25	女方因素	2	9.77	854	0.64	2	7.82	2.71	48	4	7	1.31	A	IVF	1	0	0	0	0	0	0	是		无可移植胚胎
1654	1	C00012274	谭宁	≥35	42	4	降调节方案	3	301.923	＞10天	13	＞3000	3925	HCG	6	1	0	继发不孕	0.45	＞24	27.2	不明原因	2	6.67	853	0.42	2	11.65	4.62	68	4	5	14.5	A-B	IVF	2	0	2	0	0	0	0	否	否	全胚冷冻
1658	1	C00003415	张玉爱	≥35	44	1	刺激方案	1	300	＞10天	11	＞3000	3300	双扳机	9	2	1	继发不孕	0.6	＞24	26.7	混合因素	2	17.38	847	1.36	0	12.72	4.7	31	4	6	5.7	A		0	0	0	0	0	0	0	是		未取到卵
1659	1	C00012631	徐瑞华	≥35	38	3	刺激方案	1	300	≤10天	8	≤3000	2400	HCG	13	0	0	原发不孕	1.03	≤24	21.4	混合因素	2	7.79	845	0.23	1	12.09	4.62	55	4	5	1.3	A	ICSI	1	0	1	0	1	1	0	否	是	移植	已妊娠	临床妊娠	宫内妊娠	单胎宫内妊娠
1662	1	C00015383	谭宁	≥35	42	5	刺激方案	1	321.429	≤10天	7	≤3000	2250	HCG	6	1	0	继发不孕	0.33	＞24	27.2	女方因素	2	5.31	839	0.54	2	11.65	4.62	68	4	5	9.2	B	IVF	2	0	1	0	0	0	0	否	否	全胚冷冻
1664	1	C00007363	李媛媛	≥35	39	4	刺激方案	1	300	≤10天	9	≤3000	2700	双扳机	1	4	1	继发不孕	1.2	＞24	26.7	女方因素	2	7.87	835	0.93	3	5.98	2.24	73.77	2	8	0.75	A-B	IVF	3	0	2	1	0	0	0	否	否	全胚冷冻
1668	1	C00010267	张慧	＜35	30	1	刺激方案	1	375	≤10天	9	＞3000	3375	HCG	5	0	0	原发不孕	1.36	≤24	22.7	女方因素	2	10.66	830	1.32	1	11.71	3.25	22.69	1	6	0.67	B	IVF	0	0	0	0	0	0	0	是		无可移植胚胎
1673	1	2016110198	颜利君	≥35	40	2	刺激方案	1	375	＞10天	11	＞3000	4125	HCG	2	3	2	继发不孕	0.74	≤24	22.8	女方因素	2	1.25	821	0.95	2	8.4	9.14	86.43	4	6	8	B	IVF	2	0	1	0	0	0	0	否	否	全胚冷冻
1675	1	C00003542	李洪英	＜35	32	1	刺激方案	1	393.75	＞10天	12	＞3000	4725	HCG	2	2	1	继发不孕	0.91	≤24	22.8	女方因素	2	8.04	816	0.62	2	10.74	4.32	13	3	4	7.7	A-B	IVF	1	0	1	1	0	0	0	否	否	全胚冷冻
1676	1	2018070088	刘丽丽	≥35	36	2	刺激方案	1	375	≤10天	9	＞3000	3375	HCG	4	1	0	继发不孕	0.44	≤24	19.5	女方因素	2	20.39	815	2.78	2	7.8	3.1	35	4	6	10.9	B	IVF	2	0	2	0	0	0	0	否	否	全胚冷冻
1678	1	C00009649	巩金	＜35	33	1	降调节方案	3	334.091	＞10天	11	＞3000	3675	HCG	1	0	0	原发不孕	1.66	≤24	20.8	男方因素	2	3.5	805	0.9	3	12.12	8.51	65.98	1	8	10.2	A	ICSI	1	0	2	0	2	2	0	否	是	移植	已妊娠	临床妊娠	宫内妊娠	单胎宫内妊娠
1682	1	C00006382	殷静	＜35	33	1	刺激方案	1	450	≤10天	10	＞3000	4500	HCG	3	2	1	继发不孕	0.74	＞24	24.8	女方因素	2	27.43	792	0.75	1	10.67	4.77	19.18	3	4	0.63	B	IVF	1	0	0	0	0	0	0	否	否	全胚冷冻
1684	1	C00008796	武睿燕	≥35	36	1	刺激方案	1	330	≤10天	10	＞3000	3300	HCG	4	0	0	原发不孕	2.16	≤24	18.4	女方因素	2	23.95	788	1.22	3	7.18	6.08	43.54	2	9	5.5	A	IVF	1	0	0	0	0	0	0	是		无可移植胚胎
1685	1	C00009328	张美玲	≥35	46	2	降调节方案	3	400	≤10天	9	＞3000	3600	HCG	2	6	1	继发不孕	0.17	≤24	23.9	男方因素	2	14.63	785	0.8	2	17.21	9.89	87.35	4	5	0.54	A	ICSI	2	0	1	0	0	0	0	否	否	全胚冷冻
1688	1	C00004809	李英	≥35	43	1	刺激方案	1	293.182	＞10天	11	＞3000	3225	HCG	2	1	1	继发不孕	0.33	≤24	23.4	女方因素	2	8.45	778	0.45	2	8.11	4.37	60	4	4	9.8	A	IVF	2	0	1	0	1	1	0	否	是	移植	未妊娠
1690	1	2018060023	郝海芳	≥35	35	1	降调节方案	3	300	≤10天	9	≤3000	2700	HCG	3	2	1	继发不孕	2.32	≤24	20	女方因素	2	6.09	772	0.91	2	6.92	3.95	56.43	2	9	13	A	IVF	1	0	1	1	1	1	0	否	是	移植	未妊娠
1695	1	C00015741	王海敬	≥35	35	3	刺激方案	1	300	≤10天	6	≤3000	1800	HCG	7	1	1	继发不孕	0.23	≤24	18.8	女方因素	2	8.86	761	0.35	2	11.19	3.21	10	4	4	0.3		IVF	2	0	2	0	0	0	0	否	否	全胚冷冻
1699	1	2016100143	李如香	≥35	41	2	刺激方案	1	450	≤10天	9	＞3000	4050	HCG	8	1	1	继发不孕	0.19	＞24	24.8	女方因素	2	0.99	755	3.24	2	10.57	5.03	83.77	4	4	9	B	IVF	1	0	1	0	0	0	0	否	否	全胚冷冻
1706	1	C00015730	杜艳君	≥35	35	1	拮抗剂方案	2	322.222	≤10天	9	≤3000	2900	HCG	2	2	1	继发不孕	0.41	≤24	19.5	女方因素	2	13.99	740	1.06	2	13.39	6.43	56	4	5	0.59	A-B	IVF	0	0	0	0	0	0	0	是		无可移植胚胎
1713	1	C00017258	陈相花	≥35	42	1	拮抗剂方案	2	300	≤10天	9	≤3000	2700	HCG	1	2	1	继发不孕	1.39	≤24	20.6	女方因素	2	1.1	725	0.3	3	16.73	7.41	23	2	8	11.3	A	IVF	1	1	2	0	0	0	0	否	否	全胚冷冻
1718	1	2016080164	夏丽丽	≥35	42	4	刺激方案	1	300	≤10天	10	≤3000	3000	HCG	3	9	2	继发不孕	0.76	≤24	23.7	女方因素	2	6.17	714	0.36	2	6.52	6.6	92.17	4	4	9.8	B	IVF	1	0	2	1	0	0	0	否	否	全胚冷冻
1719	1	C00011039	刘文茹	＜35	26	1	刺激方案	1	450	≤10天	8	＞3000	3600	HCG	2	0	0	原发不孕	2.24	＞24	26.7	女方因素	2	9.17	714	0.54	1	7.58	2.76	27	1	10	8	B	IVF	0	0	0	0	0	0	0	是		无可移植胚胎
1725	1	C00012223	陈慧勤	＜35	31	2	刺激方案	1	360	≤10天	10	＞3000	3600	HCG	1	0	0	原发不孕	1.41	≤24	23.4	女方因素	2	3.52	701	0.11	1	6.79	3.57	38	1	7	13.7	B	IVF	0	0	0	0	0	0	0	是		无可移植胚胎
1726	1	C00018804	王颖	≥35	48	4	刺激方案	1	300	≤10天	8	≤3000	2400	HCG	4	3	1	继发不孕	0.806	＞24	24.6	女方因素	2	10.39	692.14	2.78	1	8.87	5.88	40	4	3	3.8	B	IVF	0	0	0	0	0	0	0	是		无可移植胚胎
1728	1	2016100207	李倩	≥35	42	3	刺激方案	1	450	≤10天	9	＞3000	4050	HCG	3	2	1	继发不孕	0.85	≤24	23.7	女方因素	2	7.62	686	1.17	2	12	4.03	52	4	4	8.3	A-B	IVF	1	0	0	0	0	0	0	是		无可移植胚胎
1731	1	C00006125	潘和枝	≥35	40	1	拮抗剂方案	2	425	≤10天	8	＞3000	3400	HCG	3	3	1	原发不孕	1.05	≤24	21.5	女方因素	2	9.75	676	0.6	2	9.57	4.99	67	4	6	7.6	A	IVF	2	0	2	0	2	2	0	否	是	移植	未妊娠
1735	1	C00015595	李邦洪	≥35	45	4	刺激方案	1	375	≤10天	9	＞3000	3375	HCG	1	2	2	继发不孕	0.5	＞24	25	混合因素	2	7.35	667	0.73	2	7.82	2.71	48	4	7	10.6	A	ICSI	2	0	2	0	2	2	0	否	是	移植	未妊娠
1736	1	2017060002	邓素珍	≥35	41	2	拮抗剂方案	2	337.5	≤10天	6	≤3000	2025	HCG	3	3	1	继发不孕	0.66	≤24	19.5	男方因素	2	7.91	666	2.01	3	16.98	7.97	71	4	4	6.6	A	ICSI	3	0	2	0	2	2	0	否	是	移植	未妊娠
1737	1	C00009247	巩丽娟	≥35	43	1	拮抗剂方案	2	480	≤10天	10	＞3000	4800	HCG	3	3	1	原发不孕	0.22	≤24	18.4	混合因素	2	9.83	663	0.56	0	11.96	9.83	63	4	4	7.9	A		0	0	0	0	0	0	0	是		未取到卵
1744	1	2016110074	卜凡燕	≥35	39	1	刺激方案	1	300	≤10天	8	≤3000	2400	HCG	7	2	1	继发不孕	0.19	＞24	26.6	女方因素	2	9.65	640	0.78	2	17.42	9.74	40	4	4	10	A	IVF	2	0	2	1	0	0	0	否	否	全胚冷冻
1747	1	2016060161	张艳	≥35	40	1	降调节方案	3	400	＞10天	15	＞3000	6000	HCG	1	0	0	原发不孕	0.31	＞24	27.5	女方因素	2	0.57	633	0.52	3	12.17	4.12	70.63	4	5	14	A	IVF	2	0	2	1	2	2	0	否	是	移植	已妊娠	临床妊娠	宫内妊娠	单胎宫内妊娠
1748	1	2017040197	张一蕾	≥35	44	4	降调节方案	3	352.273	＞10天	11	＞3000	3875	HCG	3	6	1	继发不孕	0.806	≤24	21.5	混合因素	2	2.06	633	0.69	3	11.58	3.41	77.07	4	4	9.8	A-B	ICSI	1	0	0	0	0	0	0	是		无可移植胚胎
1752	1	C00008447	伊爽	≥35	37	2	刺激方案	1	375	≤10天	9	＞3000	3375	HCG	3	0	0	原发不孕	1.05	＞24	24.6	混合因素	2	12.68	626	0.22	2	14.94	2.77	10	4	4	0.72	A	ICSI	2	0	2	0	0	0	0	否	否	全胚冷冻
1754	1	2016030263	张吉明	≥35	37	1	降调节方案	3	325	＞10天	12	＞3000	3900	HCG	5	1	1	继发不孕	1.8	＞24	31.2	女方因素	2	4.89	623	0.94	3	7.78	4.48	86.43	2	10	15	A	IVF	1	0	1	0	0	0	0	否	否	全胚冷冻
1755	1	2016060111	史希焕	＜35	25	4	刺激方案	1	337.5	≤10天	10	＞3000	3375	HCG	3	3	0	继发不孕	0.11	＞24	24.4	女方因素	2	2.6	622	0.63	2	12.67	4.55	45.67	3	4	11	A	IVF	0	0	0	0	0	0	0	是		未受精
1756	1	C00016423	张振林	≥35	37	1	降调节方案	3	316.071	＞10天	14	＞3000	4425	HCG	7	5	2	继发不孕	0.54	≤24	22.6	女方因素	2	2.73	621	0.5	1	16.17	6.39	59	4	6	13.5	A	IVF	1	0	0	0	0	0	0	是		无可移植胚胎
1757	1	C00015396	陈泽玲	＜35	31	2	拮抗剂方案	2	300	＞10天	12	＞3000	3600	HCG	7	0	0	原发不孕	2.85	＞24	31.2	混合因素	2	1.39	616	0.59	5	5.16	2.16	44	1	12	13.1	B	ICSI	3	1	1	0	0	0	0	否	否	全胚冷冻
1762	1	C00004116	槐琳琳	＜35	31	2	降调节方案	3	450	＞10天	11	＞3000	4950	HCG	5	0	0	原发不孕	1.47	≤24	19.6	男方因素	2	0.44	608	0.59	2	5.78	6.22	65.37	1	7	12.3	A	ICSI	2	0	1	0	1	1	0	否	是	移植	未妊娠
1766	1	2018010134	赵万方	≥35	38	2	拮抗剂方案	2	300	≤10天	6	≤3000	1800	HCG	2	8	1	继发不孕	1.3	≤24	22.2	男方因素	2	2.26	606	0.39	2	7.21	5.78	55.42	2	9	#NULL!		ICSI	2	0	1	0	0	0	0	否	否	全胚冷冻
1771	1	2017050221	王春荣	＜35	29	1	刺激方案	1	300	≤10天	7	≤3000	2100	HCG	2	0	0	原发不孕	2.340	≤24	22.1	混合因素	2	10.14	599	0.46	2	10.04	2.45	17	1	8	5.7	A-B	ICSI	2	0	2	0	0	0	0	否	否	全胚冷冻
1772	1	2016040233	李凤娟	≥35	43	2	降调节方案	3	425	≤10天	7	≤3000	2975	HCG	3	3	1	继发不孕	1.0	≤24	22.2	混合因素	2	11.81	595	0.71	0	16.15	5.56	24	4	6	9.7	A		0	0	0	0	0	0	0	是		未取到卵
1773	1	C00009209	刘春红	≥35	42	3	刺激方案	1	300	＞10天	13	＞3000	3900	HCG	5	4	1	继发不孕	0.24	≤24	22.1	混合因素	2	18.62	594	0.5	0	17.41	7.65	58.72	4	5	0.74	B		0	0	0	0	0	0	0	是		未取到卵
1775	1	2016070012	李倩	≥35	42	2	刺激方案	1	307.5	≤10天	10	＞3000	3075	HCG	3	2	1	继发不孕	0.52	≤24	23.7	女方因素	2	1.42	593	0.68	2	12	4.03	44	4	5	9.7	B	IVF	2	0	1	0	0	0	0	否	否	全胚冷冻
1780	1	C00012345	潘健健	≥35	36	1	拮抗剂方案	2	391.667	＞10天	12	＞3000	4700	HCG	6	0	0	原发不孕	1.25	≤24	21.4	混合因素	2	9.91	582	1.78	1	9.51	5.22	39.09	2	5	12	A	ICSI	1	0	1	1	0	0	0	否	否	全胚冷冻
1782	1	2016100126	刘建梅	≥35	40	3	拮抗剂方案	2	384.375	≤10天	8	＞3000	3075	HCG	5	1	1	继发不孕	1.97	＞24	29.7	混合因素	2	2.65	578	0.35	5	6.75	3.49	93	2	10	10.3	A	ICSI	2	0	2	0	0	0	0	否	否	全胚冷冻
1784	1	2018020124	解玲玲	≥35	41	2	刺激方案	1	375	≤10天	10	＞3000	3750	HCG	2	3	1	继发不孕	0.36	≤24	21.2	不明原因	2	12.66	575	0.69	1	14.96	6.73	86.43	4	6	7.2	B	IVF	1	0	1	1	0	0	0	否	否	全胚冷冻
1796	1	C00010960	巩守霞	≥35	42	1	拮抗剂方案	2	314.062	≤10天	8	≤3000	2512.5	双扳机	1	5	1	继发不孕	0.95	≤24	23.2	女方因素	2	3.02	546	0.25	2	11.4	3.52	48	4	7	10	A	IVF	0	0	0	0	0	0	0	是		未受精
1797	1	C00017430	王连琼	≥35	38	1	拮抗剂方案	2	300	≤10天	7	≤3000	2100	HCG	2	3	0	继发不孕	1.2	≤24	18.4	女方因素	2	27.3	545	0.6	2	5.9	2.64	41.75	2	7	9.5	A-B	IVF	2	0	2	0	2	2	0	否	是	移植	未妊娠
1800	1	2016080138	汲君	≥35	46	3	刺激方案	1	300	＞10天	11	＞3000	3300	HCG	3	3	0	继发不孕	0.48	≤24	21.4	女方因素	2	5.69	540	0.51	3	6.66	3.39	105	4	3	5	B-C	IVF	2	0	2	2	0	0	0	否	否	全胚冷冻
1805	1	2016030301	李凤娟	≥35	43	1	降调节方案	3	375	≤10天	7	≤3000	2625	HCG	3	3	1	继发不孕	0.56	≤24	22.2	混合因素	2	10.91	533	1.16	0	16.15	5.56	24	4	6	8.5	A		0	0	0	0	0	0	0	是		未取到卵
1813	1	C00010981	穆金丽	≥35	40	2	降调节方案	3	405.556	＞10天	18	＞3000	7300	HCG	6	0	0	原发不孕	1.57	＞24	35.4	混合因素	2	3.13	525	0.44	0	11	4.87	23	2	8	11.2	A		0	0	0	0	0	0	0	是		未取到卵
1815	1	2018060271	艾贻云	≥35	46	1	刺激方案	1	306.818	＞10天	11	＞3000	3375	HCG	3	4	3	继发不孕	0.74	≤24	21.6	女方因素	2	7.05	517	1.18	1	18.81	11.76	55.05	4	3	4.8		IVF	0	0	0	0	0	0	0	是		无可移植胚胎
1819	1	2018030188	高红	≥35	43	5	刺激方案	1	431.25	≤10天	8	＞3000	3450	HCG	10	1	1	继发不孕	0.45	＞24	28.2	男方因素	2	1.64	511	0.63	3	8.94	5.63	86.43	4	5	8.4	B	ICSI	2	0	0	0	0	0	0	是		无可移植胚胎
1822	1	2017120110	殷红霞	≥35	42	2	拮抗剂方案	2	397.5	＞10天	20	＞3000	7950	双扳机	0	2	1	继发不孕	0.58	＞24	26	混合因素	2	2.49	506	1.25	3	11.15	4.36	76.43	4	6	7.7	A	ICSI	2	0	1	1	0	0	0	否	否	全胚冷冻
1829	1	C00013082	刘明婧	＜35	30	1	降调节方案	3	320.455	＞10天	11	＞3000	3525	HCG	6	1	0	继发不孕	0.56	＞24	27	女方因素	2	1.77	490	0.3	2	12.36	6.75	34	3	6	11.7	A	IVF	2	0	2	2	2	2	0	否	是	移植	已妊娠	临床妊娠	宫内妊娠	双胎宫内妊娠
1832	1	C00005073	李慧	≥35	43	1	刺激方案	1	381.25	＞10天	12	＞3000	4575	双扳机	4	3	3	继发不孕	0.58	≤24	20.8	女方因素	2	3.75	486	0.74	1	15.2	3.98	40	4	5	8.9	A	IVF	0	0	0	0	0	0	0	是		无可移植胚胎
1834	1	2016120160	时新萃	≥35	46	2	刺激方案	1	300	≤10天	7	≤3000	2100	HCG	5	3	2	继发不孕	0.09	＞24	29.3	女方因素	2	4.84	480	1.05	2	19.26	3.49	99.09	4	2	8.5	A-B	IVF	1	0	1	0	0	0	0	否	否	全胚冷冻
1847	1	C00012026	傅琳	≥35	41	1	拮抗剂方案	2	371.875	≤10天	8	≤3000	2975	HCG	5	0	0	原发不孕	0.30	≤24	23.1	女方因素	2	15.31	435	0.61	2	15.78	5.83	65	4	6	1.13	A	IVF	2	0	1	0	1	1	0	否	是	移植	已妊娠	临床妊娠	宫外妊娠	异位妊娠
1849	1	2016060239	陈维彦	≥35	47	1	刺激方案	1	330	≤10天	10	＞3000	3300	HCG	1	0	0	继发不孕	0.47	＞24	24.7	女方因素	2	0.94	433	0.48	1	13.56	7.39	13	4	3	8.7	B	IVF	1	0	0	0	0	0	0	是		无可移植胚胎
1858	1	2016110213	李亚霜	≥35	47	6	刺激方案	1	428.571	＞10天	14	＞3000	6000	HCG	5	4	1	继发不孕	0.07	≤24	22	混合因素	2	23.34	383	3.93	#NULL!	16.3	4.56	69.63	4	2	11.6	B		0	0	0	0	0	0	0	是		未取卵
1862	1	2018010175	侯艳荣	≥35	42	2	刺激方案	1	300	≤10天	5	≤3000	1500	HCG	3	2	1	继发不孕	0.62	≤24	23.4	混合因素	2	20.7	373	2.25	0	6.88	2.13	39.5	4	4	7.6	A-B		0	0	0	0	0	0	0	是		未取到卵
1867	1	C00017015	刘菲菲	≥35	36	1	刺激方案	1	340.385	＞10天	13	＞3000	4425	HCG	3	0	0	原发不孕	0.3	≤24	23.4	女方因素	2	32.99	362	1.73	0	6.23	4.07	76.86	4	5	6.3	B		0	0	0	0	0	0	0	是		未取到卵
1871	1	2017040088	王秋菊	≥35	37	1	刺激方案	1	382.5	≤10天	10	＞3000	3825	HCG	9	0	0	原发不孕	1.13	＞24	25.2	混合因素	2	25.84	349	1.19	1	7.91	5.56	40.37	4	6	7.7	A	ICSI	1	0	1	0	0	0	0	否	否	全胚冷冻
1879	1	2016060184	崔自娟	≥35	37	1	降调节方案	3	325	≤10天	9	≤3000	2925	HCG	3	3	1	继发不孕	3.18	≤24	23	女方因素	2	0.69	283	2.24	1	6.76	3.67	30	2	7	8.8	A	IVF	0	0	0	0	0	0	0	是		无可移植胚胎
1880	1	2016040057	吴士珍	≥35	48	1	降调节方案	3	326.786	≤10天	7	≤3000	2287.5	HCG	2	2	1	继发不孕	0.93	＞24	24.2	女方因素	2	3.73	629	1.21	4	8	3.05	91.75	4	5	9.6	B	IVF	1	0	0	0	0	0	0	是		无可移植胚胎
1888	1	C00011610	刘莹	≥35	40	2	刺激方案	1	300	≤10天	7	≤3000	2100	HCG	1	4	2	继发不孕	1.24	≤24	21.8	女方因素	6	6.38	1191	1.24	7	6.6	4.33	31	2	11	0.72	A	IVF	2	0	2	1	0	0	0	否	否	全胚冷冻
1891	1	C00016958	金晓红	≥35	39	1	刺激方案	1	300	≤10天	9	≤3000	2700	HCG	1	2	2	继发不孕	0.40	＞24	29.4	女方因素	2	7.28	305	0.76	1	9.26	3.59	43	4	5	0.58	B	IVF	1	0	1	0	0	0	0	否	否	全胚冷冻
1895	1	2018060029	刘正香	≥35	45	4	刺激方案	1	337.5	≤10天	8	≤3000	2700	HCG	3	5	0	继发不孕	0.51	＞24	26.6	不明原因	2	11.62	455	0.71	2	7.78	5.28	57.62	4	5	5.3	B	IVF	1	0	1	0	0	0	0	否	否	全胚冷冻
1896	1	2017110110	燕国英	≥35	45	3	降调节方案	3	300	≤10天	9	≤3000	2700	HCG	1	4	1	继发不孕	1.090	≤24	22.5	女方因素	2	0.79	394	0.65	2	9.92	3.71	38	4	4	8.4	A	IVF	1	0	1	0	2	2	0	否	是	移植	未妊娠
1901	1	2017060014	王爱美	≥35	41	1	拮抗剂方案	2	358.333	≤10天	9	＞3000	3225	HCG	2	2	1	继发不孕	1.89	≤24	23.4	男方因素	4	2.85	917	1.01	5	10.31	3.74	68.08	2	9	10.8	A-B	ICSI	3	0	3	3	2	2	0	否	是	移植	未妊娠
1902	1	C00016517	邹淑娟	≥35	44	1	刺激方案	1	300	＞10天	13	＞3000	3900	HCG	2	5	1	继发不孕	0.52	≤24	21	女方因素	2	7.35	516	0.97	1	10.76	3.05	21	4	6	0.58	B	IVF	1	0	1	0	0	0	0	否	否	全胚冷冻
1903	1	C00011995	于兰芳	≥35	42	2	拮抗剂方案	2	334.091	＞10天	11	＞3000	3675	HCG	3	4	1	继发不孕	1.28	≤24	20	女方因素	2	10.27	512	0.46	3	6.33	7.23	41.75	2	8	6.3	B	IVF	1	0	1	0	1	1	0	否	是	移植	未妊娠
1904	1	C00017380	王海敬	≥35	35	4	刺激方案	1	300	≤10天	7	≤3000	2100	HCG	7	1	1	继发不孕	0.23	≤24	18.8	女方因素	2	8.74	511	0.7	3	11.19	3.21	10	4	4	0.67	A-B	IVF	1	0	0	0	0	0	0	是		无可移植胚胎
1905	1	C00003948	杨咏梅	≥35	43	3	刺激方案	1	327.273	＞10天	11	＞3000	3600	HCG	1	4	1	继发不孕	0.53	≤24	19.8	混合因素	2	15.34	511	2.08	2	18.97	5.74	84	4	3	4.9	B	ICSI	0	0	0	0	0	0	0	是		无可移植胚胎
1907	1	2017090156	耿雪	＜35	28	5	刺激方案	1	300	≤10天	9	≤3000	2700	HCG	3	1	0	继发不孕	1.03	≤24	19	女方因素	2	10.52	509	0.27	2	7.32	3.51	66.43	3	5	4.6	A	IVF	2	0	2	0	0	0	0	否	否	全胚冷冻
1912	1	C00008575	王娟	≥35	51	2	拮抗剂方案	2	387.5	≤10天	10	＞3000	3875	HCG	1	1	1	继发不孕	0.89	＞24	30.1	女方因素	2	3.4	499.54	0.87	2	11.76	5.83	29	4	3	12.8	A	IVF	0	0	1	0	0	0	0	否	否	全胚冷冻
1913	1	C00014154	任淑青	≥35	47	6	刺激方案	1	300	≤10天	6	≤3000	1800	HCG	1	5	1	继发不孕	0.45	≤24	22.6	女方因素	2	1.65	497	0.09	2	13.18	5.72	86	4	6	0.8	A	IVF	1	0	0	0	0	0	0	是		无可移植胚胎
1918	1	2017110214	李芳	＜35	34	1	降调节方案	3	375	＞10天	13	＞3000	4875	HCG	3	1	0	继发不孕	1.07	≤24	18.3	男方因素	2	8.62	486	1.02	3	6.36	5.56	85.14	3	8	11.4	A	ICSI	3	0	2	0	2	2	0	否	是	移植	已妊娠	临床妊娠	宫内妊娠	单胚胎停
1921	1	C00016030	任俊杰	≥35	36	1	拮抗剂方案	2	325	≤10天	10	＞3000	3250	HCG	1	3	0	继发不孕	2.31	≤24	22.3	女方因素	2	3.95	477	0.89	3	9.27	4.57	33	2	7	6.2	C	IVF	1	0	1	1	0	0	0	否	否	全胚冷冻
1922	1	C00016838	张秋梅	≥35	42	1	刺激方案	1	391.667	＞10天	15	＞3000	5875	HCG	3	2	1	继发不孕	1.04	＞24	25	男方因素	2	9.46	473	1.08	3	12.09	4.94	19.55	4	4	10.8	A	ICSI	2	0	2	0	0	0	0	否	否	全胚冷冻
1925	1	C00019040	李秀梅	≥35	40	5	拮抗剂方案	2	450	＞10天	13	＞3000	5850	HCG	6	2	1	继发不孕	0.11	＞24	24.8	女方因素	2	30.97	468	1.93	1	14.86	6.02	62	4	4	9.5	A	IVF	0	0	0	0	0	0	0	是		无可移植胚胎
1926	1	2016010024	田林林	＜35	31	3	刺激方案	1	375	＞10天	12	＞3000	4500	HCG	5	0	0	原发不孕	1.51	≤24	22.8	男方因素	5	1.83	1064	0.94	6	8.34	4.16	30	1	8	9.6	B	ICSI	3	0	2	2	2	2	0	否	是	移植	未妊娠
1928	1	2017030056	陈明霞	≥35	45	1	降调节方案	3	300	≤10天	8	≤3000	2400	HCG	1	5	2	继发不孕	0.92	≤24	22.9	混合因素	2	3.97	456.45	0.5	2	6.94	3.59	41	4	10	9.5	A	ICSI	2	0	0	0	0	0	0	是		无可移植胚胎
1929	1	C00017078	刘玉玲	≥35	43	1	刺激方案	1	346.154	＞10天	13	＞3000	4500	HCG	3	2	0	继发不孕	1.10	≤24	24	女方因素	2	22.9	456	1.57	2	5.05	3.23	41	4	8	0.4	A	IVF	0	0	0	0	0	0	0	是		无可移植胚胎
1932	1	2017020203	周春玲	≥35	43	2	刺激方案	1	300	≤10天	8	≤3000	2400	HCG	13	5	2	继发不孕	0.7	＞24	24.2	女方因素	2	4.76	439	0.62	2	9.26	3.52	40.1	4	4	12.7	B	IVF	2	0	2	0	0	0	0	否	否	全胚冷冻
1934	1	2017100158	周素丽	≥35	42	1	刺激方案	1	300	≤10天	10	≤3000	3000	HCG	3	4	1	继发不孕	0.63	≤24	20	女方因素	2	5.85	435	0.35	1	8.17	4.2	102	4	4	10.7	A	IVF	0	0	0	0	0	0	0	是		未受精
1935	1	C00011174	李永菊	≥35	47	3	刺激方案	1	368.75	≤10天	8	≤3000	2950	HCG	9	5	1	继发不孕	0.59	＞24	24.5	女方因素	2	6.36	433	0.67	2	18.67	4.51	97.9	4	3	9.4	A	IVF	1	0	0	0	0	0	0	是		无可移植胚胎
1939	1	C00019389	史建叶	≥35	41	7	刺激方案	1	300	＞10天	12	＞3000	3600	HCG	2	3	0	继发不孕	0.320	≤24	23.3	女方因素	2	6.88	417	0.67	3	11.56	4.77	49.09	4	5	6	C	IVF	1	0	0	0	0	0	0	是		无可移植胚胎
1941	1	C00012035	宋炜彤	≥35	45	1	刺激方案	1	427.5	≤10天	10	＞3000	4275	HCG	3	3	1	继发不孕	1.05	＞24	25.6	女方因素	2	3.68	412	0.15	1	17.09	5.42	41	4	6	4.7	B-C	IVF	1	0	0	0	0	0	0	是		无可移植胚胎
1945	1	C00017992	邹淑娟	≥35	44	2	刺激方案	1	300	≤10天	9	≤3000	2700	HCG	2	5	1	继发不孕	0.32	≤24	21	女方因素	2	6.2	382	1.35	2	10.76	3.05	21	4	6	6.3	B	IVF	2	0	1	0	0	0	0	否	否	全胚冷冻
1946	1	2017050122	牛振红	≥35	43	1	刺激方案	1	342.857	＞10天	14	＞3000	4800	HCG	3	2	1	继发不孕	0.2	≤24	20.6	混合因素	2	16.58	378	1.21	0	16.62	8.7	40.37	4	4	6.5	B		0	0	0	0	0	0	0	是		未取到卵
1948	1	2017020182	邹静静	≥35	42	3	刺激方案	1	300	≤10天	5	≤3000	1500	HCG	3	3	1	继发不孕	0.30	≤24	22.1	女方因素	2	2.49	510	1.63	2	9.39	2.95	25.69	4	5	12.2	B	IVF	1	0	1	1	0	0	0	否	否	全胚冷冻
1951	1	C00015957	厉艳艳	≥35	40	1	刺激方案	1	300	≤10天	8	≤3000	2400	HCG	5	1	1	继发不孕	1.5	＞24	24.8	女方因素	2	5.9	806	0.62	4	4.8	2.86	16	2	9	0.81	B	IVF	2	0	1	1	0	0	0	否	否	全胚冷冻
1952	1	C00016091	李新文	＜35	31	4	刺激方案	1	400	≤10天	9	＞3000	3600	HCG	3	0	0	原发不孕	1.0	≤24	21.8	混合因素	2	35.21	503.17	1.71	0	11.62	4.58	71	3	3	0.82	A-B		0	0	0	0	0	0	0	是		未取到卵
1953	1	C00016996	孙洪芳	≥35	46	3	刺激方案	1	450	≤10天	9	＞3000	4050	HCG	6	5	1	继发不孕	0.17	≤24	22.6	女方因素	2	10.83	502	0.85	2	14.3	7.33	53	4	7	0.44		IVF	1	0	1	1	0	0	0	否	否	全胚冷冻
1956	1	2018060185	王淑霞	≥35	42	1	刺激方案	1	300	≤10天	7	≤3000	2100	HCG	3	2	1	继发不孕	0.16	＞24	25.9	女方因素	2	6.29	494	0.36	1	8.62	4.49	50.1	4	4	9.3	A-B	IVF	1	0	1	1	0	0	0	否	否	全胚冷冻
1960	1	C00009906	张华	≥35	44	3	刺激方案	1	450	≤10天	9	＞3000	4050	HCG	19	0	0	原发不孕	0.49	＞24	27.9	混合因素	2	11.24	486	0.49	0	12.55	9.04	52.7	4	4	0.65	B-C		0	0	0	0	0	0	0	是		未取到卵
1961	1	C00017626	孙彦玲	≥35	37	2	拮抗剂方案	2	290.625	≤10天	8	≤3000	2325	双扳机	3	5	1	继发不孕	1.70	≤24	23.5	女方因素	2	6.44	484	1.03	1	5.59	2.38	40	2	11	6.8	A	IVF	1	0	1	0	0	0	0	否	否	全胚冷冻
1963	1	2017110224	张园园	＜35	29	1	降调节方案	3	414.167	＞10天	15	＞3000	6212.5	HCG	4	0	0	继发不孕	0.75	＞24	24.7	男方因素	2	0.26	477	0.62	2	5.42	4.67	81.1	3	6	4.5		IVF	2	0	0	0	0	0	0	是		无可移植胚胎
1964	1	C00003370	苟书梅	≥35	42	1	拮抗剂方案	2	450	＞10天	11	＞3000	4950	HCG	4	2	0	继发不孕	0.93	≤24	22.3	女方因素	2	5.33	473	0.93	1	10.05	4.72	20	4	9	0.7	A	IVF	0	0	0	0	0	0	0	是		无可移植胚胎
1965	1	C00006413	史建叶	≥35	38	2	拮抗剂方案	2	375	≤10天	5	≤3000	1875	HCG	1	3	0	继发不孕	0.2	≤24	23.3	女方因素	2	3.02	470	0.41	3	7.01	3.39	77	4	5	3.4	B	IVF	3	0	0	0	0	0	0	是		无可移植胚胎
1966	1	2016110236	罗锦旻	≥35	40	1	降调节方案	3	410.294	＞10天	17	＞3000	6975	HCG	2	1	0	继发不孕	2.91	≤24	17.2	混合因素	2	5.9	469	2.67	2	11.9	4.9	40.37	2	6	9.6	A-B	ICSI	4	0	1	0	0	0	0	否	否	全胚冷冻
1971	1	2017030041	史建平	≥35	41	1	降调节方案	3	450	≤10天	10	＞3000	4500	HCG	2	5	1	继发不孕	0.63	＞24	25	混合因素	2	0.58	456	0.78	4	7.5	3.51	93	4	5	14.7	A	ICSI	3	0	2	1	2	2	0	否	是	移植	未妊娠
1973	1	2017030303	侯东红	≥35	44	1	拮抗剂方案	2	325	≤10天	8	≤3000	2600	双扳机	1	4	1	继发不孕	0.78	＞24	24.2	混合因素	2	22.81	444.65	0.35	#NULL!	7.43	5.26	39.5	4	5	8.8	A-B		0	0	0	0	0	0	0	是		未取卵
1974	1	C00007606	王娟	＜35	30	1	刺激方案	1	450	≤10天	9	＞3000	4050	HCG	3	0	0	原发不孕	1.18	≤24	20.5	女方因素	2	13.32	439	1.4	0	11.16	4.81	47	3	4	0.48	A-B		0	0	0	0	0	0	0	是		未取到卵
1979	1	C00004653	李莉萍	≥35	35	4	拮抗剂方案	2	325	≤10天	9	≤3000	2925	HCG	4	2	1	继发不孕	0.3	≤24	19.2	男方因素	2	10.66	422	0.66	3	9.9	8.22	93	4	4	4.4	单层	ICSI	3	0	1	1	0	0	0	否	否	全胚冷冻
1983	1	C00017705	张振林	≥35	37	2	拮抗剂方案	2	300	≤10天	10	≤3000	3000	HCG	7	5	2	继发不孕	2.13	≤24	22.6	女方因素	2	1.57	412	0.78	3	16.17	6.39	59	2	6	13	A-B	IVF	2	0	1	0	1	1	0	否	是	移植	已妊娠	临床妊娠	宫内妊娠	单胎宫内妊娠
1988	1	2016120031	周春玲	≥35	43	1	刺激方案	1	316.667	≤10天	9	≤3000	2850	HCG	13	5	2	继发不孕	0.41	＞24	24.2	女方因素	2	6.26	406	0.43	1	9.26	3.52	90.1	4	4	12.8	B-C	IVF	1	0	1	1	0	0	0	否	否	全胚冷冻
1991	1	C00008285	穆金丽	≥35	38	1	拮抗剂方案	2	390	≤10天	10	＞3000	3900	HCG	6	0	0	原发不孕	1.55	＞24	35.4	女方因素	2	10.67	486	0.62	2	11	4.87	23	2	8	9.6	A	IVF	1	0	1	1	0	0	0	否	否	全胚冷冻
1995	1	C00011583	史建叶	≥35	39	5	刺激方案	1	300	≤10天	8	≤3000	2400	HCG	1	3	0	继发不孕	0.66	≤24	23.3	女方因素	2	12.52	497	1.4	2	7.01	3.39	67	4	5	9.2	A	IVF	1	0	1	0	0	0	0	否	否	全胚冷冻
1996	1	C00010652	姜桂霞	≥35	43	1	刺激方案	1	450	＞10天	12	＞3000	5400	HCG	1	2	1	继发不孕	0.42	＞24	28.1	女方因素	2	6.29	494	0.36	3	13.13	3.84	93.36	4	5	0.52	B	IVF	0	0	0	0	0	0	0	是		无可移植胚胎
1998	1	2017090153	杨云云	＜35	34	4	刺激方案	1	375	＞10天	12	＞3000	4500	HCG	2	1	1	继发不孕	1.26	≤24	23.4	男方因素	2	3.88	490	0.49	3	5.34	4.89	45	1	6	11.9	A	ICSI	2	0	1	0	0	0	0	否	否	全胚冷冻
2002	1	2016030326	孙在芳	≥35	43	1	刺激方案	1	347.727	＞10天	11	＞3000	3825	HCG	2	4	1	继发不孕	0.93	≤24	23.2	女方因素	1	4.61	965	0.49	3	14.45	4.17	78.54	4	6	8	A	IVF	3	0	2	0	0	0	0	否	否	全胚冷冻
2005	1	2016050170	刘业静	≥35	42	5	刺激方案	1	428.571	≤10天	7	≤3000	3000	双扳机	1	5	1	继发不孕	0.7	＞24	25.4	女方因素	1	7.28	951	1.02	0	15.78	4.85	46.43	4	3	5.5	B		0	0	0	0	0	0	0	是		未取到卵
2008	1	2017030066	王桂英	≥35	44	3	降调节方案	3	425	＞10天	11	＞3000	4675	HCG	8	2	0	继发不孕	0.23	＞24	25.7	女方因素	1	10.13	928	1.02	0	12.28	6.5	46.43	4	3	7.5	A		0	0	0	0	0	0	0	是		未取到卵
2011	1	2017060129	熊巩莹	＜35	27	2	刺激方案	1	631.25	＞10天	12	＞3000	7575	HCG	4	1	0	继发不孕	0.29	＞24	27.1	女方因素	1	5.55	861	0.67	1	12.9	2.9	67.37	3	5	4.1	B	IVF	1	0	0	0	0	0	0	是		无可移植胚胎
2014	1	C00013478	杜娜娜	≥35	35	3	刺激方案	1	300	≤10天	8	≤3000	2400	HCG	3	0	0	原发不孕	0.65	≤24	22	女方因素	1	17.79	840	0.72	1	15.2	3.98	40	4	3	0.94	B	IVF	1	0	1	0	0	0	0	否	否	全胚冷冻
2015	1	C00014845	姜婷婷	＜35	31	1	拮抗剂方案	2	300	≤10天	9	≤3000	2700	双扳机	1	2	0	继发不孕	1.79	≤24	18	女方因素	1	2.9	824	0.69	1	13.37	4.99	53	1	7	9.8	A	IVF	1	0	1	0	0	0	0	否	否	全胚冷冻
2017	1	C00008460	张华	≥35	44	1	刺激方案	1	300	≤10天	9	≤3000	2700	HCG	19	0	0	原发不孕	0.20	＞24	27.9	女方因素	1	11.25	788	0.27	2	12.55	3.44	10	4	4	0.68	B	IVF	2	0	0	0	0	0	0	是		无可移植胚胎
2018	1	C00007305	刘婷婷	≥35	43	1	拮抗剂方案	2	300	≤10天	5	≤3000	1500	双扳机	2	3	1	继发不孕	0.76	≤24	21.5	女方因素	1	4.04	784	0.42	0	10.58	6.2	45	4	6	1	A		0	0	0	0	0	0	0	是		未取到卵
2026	1	C00018551	孙维谦	＜35	34	1	拮抗剂方案	2	336.111	≤10天	9	＞3000	3025	HCG	3	0	0	原发不孕	3.29	≤24	19	男方因素	1	1	732.18	0.57	4	4.67	3.88	46.81	1	10	8.5	A	ICSI	3	0	2	0	2	2	0	否	是	移植	未妊娠
2031	1	2017020076	丁立梅	≥35	43	2	降调节方案	3	462.5	＞10天	14	＞3000	6475	HCG	1	4	1	继发不孕	0.06	≤24	20.9	女方因素	1	5.26	709	0.76	0	17.03	5.81	95.08	4	2	10.8	A		0	0	0	0	0	0	0	是		未取到卵
2035	1	C00004859	田明秀	≥35	46	8	拮抗剂方案	2	325	≤10天	5	≤3000	1625	HCG	4	2	1	继发不孕	0.76	≤24	22.8	女方因素	1	10.12	287	0.46	1	17.73	9.91	68	4	3	7.9	A		0	0	0	0	0	0	0	是		未行授精
2036	1	C00011580	卢凤	≥35	38	1	拮抗剂方案	2	342.857	≤10天	7	≤3000	2400	双扳机	2	3	1	继发不孕	1.3	≤24	21.3	女方因素	1	7.64	685	0.43	2	5.83	3.07	40	2	8	1	A	IVF	2	0	2	1	0	0	0	否	否	全胚冷冻
2039	1	C00010616	戚相华	≥35	44	4	降调节方案	3	312.5	≤10天	6	≤3000	1875	HCG	1	2	2	继发不孕	0.67	＞24	25.4	女方因素	1	3.5	674	0.42	2	15.05	5.07	46	4	5	9.6	A-B	IVF	1	0	1	0	0	0	0	否	否	全胚冷冻
2042	1	C00018334	孟红英	≥35	35	1	拮抗剂方案	2	345.455	＞10天	11	＞3000	3800	HCG	5	1	0	继发不孕	1.84	＞24	27.2	混合因素	1	8.16	661.85	1.19	2	8.4	2.45	34.56	2	7	7.5	A	ICSI	1	0	1	1	1	1	0	否	是	移植	已妊娠	临床妊娠	宫内妊娠	单胎宫内妊娠
2043	1	C00017983	刘丹丹	≥35	35	1	刺激方案	1	300	≤10天	4	≤3000	1200	双扳机	5	0	0	原发不孕	0.94	≤24	20.7	女方因素	1	20.85	361	0.52	#NULL!	5.26	4.5	31.76	4	6	9.2	A		0	0	0	0	0	0	0	是		未取卵
2048	1	C00004094	郭冬梅	≥35	46	1	降调节方案	3	450	≤10天	7	＞3000	3150	HCG	6	5	2	继发不孕	0.67	＞24	26	混合因素	1	11.18	655	1.35	#NULL!	13.58	4.01	62	4	3	7.3	B		0	0	0	0	0	0	0	是		未取卵
2051	1	C00015127	陈艳玲	≥35	46	3	拮抗剂方案	2	326.25	≤10天	10	＞3000	3262.5	HCG	1	1	0	继发不孕	0.93	≤24	23.4	男方因素	1	4.13	651	1.44	3	10.82	7.4	23	4	7	11.8	A-B	ICSI	3	0	2	1	2	2	0	否	是	移植	未妊娠
2053	1	C00011765	王乃凤	≥35	45	1	拮抗剂方案	2	357.143	≤10天	7	≤3000	2500	双扳机	6	4	1	原发不孕	0.70	＞24	26.8	女方因素	1	10.5	647	0.44	1	13.65	4.93	77	4	4	0.4	A	IVF	1	0	1	0	0	0	0	否	否	全胚冷冻
2055	1	C00011323	王玉珍	≥35	45	1	刺激方案	1	339.286	≤10天	7	≤3000	2375	HCG	3	2	1	继发不孕	0.43	＞24	24.1	女方因素	1	12.39	643	0.67	1	19.67	7.26	33	4	6	0.8	A-B	IVF	1	0	1	1	0	0	0	否	否	全胚冷冻
2057	1	C00012100	李永菊	≥35	48	5	拮抗剂方案	2	432.5	≤10天	10	＞3000	4325	HCG	10	5	1	继发不孕	0.06	＞24	24.5	混合因素	1	9.92	621	0.32	1	18.67	4.51	97.9	4	3	1.34	A	ICSI	1	0	1	0	1	1	0	否	是	移植	未妊娠
2059	1	C00008018	李晓	＜35	30	3	刺激方案	1	300	≤10天	5	≤3000	1500	HCG	4	3	0	继发不孕	0.87	≤24	22.2	混合因素	1	26.96	615	1.16	1	16.59	7.78	21	3	3	5.4	B	ICSI	1	0	1	0	0	0	0	否	否	全胚冷冻
2061	1	2017040122	段芳芳	＜35	34	1	降调节方案	3	291.667	≤10天	9	≤3000	2625	HCG	3	3	1	继发不孕	0.99	≤24	24	女方因素	1	18.92	605	0.5	2	11.33	3.46	43	3	4	9.8	B	IVF	0	0	0	0	0	0	0	是		无可移植胚胎
2062	1	2016080150	王凤杰	≥35	39	2	拮抗剂方案	2	337.5	＞10天	12	＞3000	4050	HCG	6	1	1	继发不孕	0.57	≤24	22.6	混合因素	1	1.4	593	0.11	0	7	4.87	91.75	4	3	12.8	B		0	0	0	0	0	0	0	是		未取到卵
2065	1	C00016709	陈艳玲	≥35	46	4	拮抗剂方案	2	362.5	＞10天	12	＞3000	4350	HCG	2	1	0	继发不孕	0.64	≤24	23.4	男方因素	1	18.5	585	1.2	1	10.82	7.4	23	4	3	10.2	A	ICSI	1	0	1	0	1	2	0	否	是	移植	未妊娠
2066	1	2018060077	李敬菊	≥35	41	1	刺激方案	1	300	≤10天	5	≤3000	1500	HCG	1	2	1	继发不孕	1.26	＞24	25.6	女方因素	1	11.57	573	0.54	2	14.53	5.74	74.34	2	6	8.8	B	IVF	1	0	1	0	0	0	0	否	否	全胚冷冻
2072	1	C00015833	高琳琳	≥35	38	7	刺激方案	1	450	≤10天	8	＞3000	3600	HCG	5	0	0	原发不孕	0.64	≤24	23.2	女方因素	1	24.45	559	0.97	1	16.59	5.61	20	4	2	0.52	A-B	IVF	0	0	0	0	0	0	0	是		未受精
2076	1	2016100002	邵萍	≥35	44	1	降调节方案	3	393.75	＞10天	16	＞3000	6300	HCG	1	6	1	原发不孕	0.13	≤24	20.2	混合因素	1	8.27	534	1.06	1	10.95	5.85	36.43	4	3	6.9	A	ICSI	2	0	2	0	0	0	0	否	否	全胚冷冻
2088	1	C00012566	于永梅	≥35	41	6	刺激方案	1	300	≤10天	7	≤3000	2100	HCG	17	0	0	原发不孕	0.42	＞24	27.3	女方因素	1	3.71	494	0.4	1	6.5	3.23	45.98	4	3	0.88	A	IVF	1	0	0	0	0	0	0	是		无可移植胚胎
2090	1	C00011736	李永菊	≥35	48	4	刺激方案	1	360	≤10天	10	＞3000	3600	HCG	10	5	1	继发不孕	0.55	＞24	24.5	女方因素	1	9.24	494	0.26	1	18.67	4.51	97.9	4	3	0.74	B	IVF	1	0	1	0	0	0	0	否	否	全胚冷冻
2092	1	C00004129	郝海芳	≥35	36	2	刺激方案	1	450	≤10天	6	≤3000	2700	双扳机	3	2	1	继发不孕	2.25	≤24	20	女方因素	1	12.79	486	0.95	1	11.92	3.95	46.43	2	9	0.6	A	IVF	1	0	0	0	0	0	0	是		无可移植胚胎
2097	1	2017050126	侯东红	≥35	44	3	降调节方案	3	325	≤10天	5	≤3000	1625	HCG	1	4	1	继发不孕	0.55	＞24	24.2	混合因素	1	10.566	473	0.62	1	7.43	5.26	39.5	4	5	8.2	A-B	ICSI	0	0	0	0	0	0	0	是		未受精
2105	1	2018070121	孟晓卉	≥35	36	1	降调节方案	3	339.583	＞10天	12	＞3000	4075	HCG	2	1	1	继发不孕	1.67	≤24	18.4	女方因素	1	0.81	458	0.68	2	10.2	6.09	45.27	2	7	7.4	A	IVF	2	0	2	1	1	1	0	否	是	移植	未妊娠
2115	1	2018050060	刘金彩	≥35	38	1	刺激方案	1	300	≤10天	10	≤3000	3000	HCG	3	2	1	继发不孕	0.3	≤24	20.2	女方因素	1	26.94	447	0.6	0	18.38	9.5	79	4	3	8.6	A		0	0	0	0	0	0	0	是		未取到卵
2116	1	C00012072	洪东霞	≥35	46	1	刺激方案	1	300	≤10天	4	≤3000	1200	HCG	4	3	0	继发不孕	0.91	≤24	21.3	女方因素	1	14.3	443	1.07	1	10.78	2.85	63	4	3	0.47	B	IVF	0	0	0	0	0	0	0	是		无可移植胚胎
2120	1	2018040196	侯喜春	＜35	33	3	降调节方案	3	450	≤10天	10	＞3000	4500	HCG	3	0	0	原发不孕	2.7	≤24	20.9	男方因素	1	1.42	434	0.41	2	10.64	4.92	40	1	8	13.9	A	ICSI	2	0	1	0	0	0	0	否	否	全胚冷冻
2122	1	C00009169	戚相华	≥35	44	3	刺激方案	1	300	≤10天	7	≤3000	2100	HCG	1	2	2	继发不孕	0.36	＞24	25.4	混合因素	1	10.64	430	0.16	2	15.05	5.07	26	4	5	7.5	A	ICSI	2	0	1	0	1	1	0	否	是	移植	未妊娠
2125	1	C00014910	谭希兰	≥35	46	1	拮抗剂方案	2	398.438	＞10天	16	＞3000	6375	HCG	1	1	1	继发不孕	0.09	≤24	23.9	混合因素	1	9.29	424	1.04	1	14.25	2.52	24	4	3	11.2	A		0	0	0	0	0	0	0	是		未行授精
2126	1	2016050179	袁红彬	≥35	45	1	刺激方案	1	366.346	＞10天	13	＞3000	4762.5	双扳机	5	6	1	继发不孕	0.66	＞24	24.4	混合因素	1	9.2	422	0.56	1	14.5	4.71	40	4	3	3.2		ICSI	0	0	0	0	0	0	0	是		未受精
2129	1	C00006871	武文波	≥35	44	1	拮抗剂方案	2	383.333	≤10天	9	＞3000	3450	双扳机	1	5	0	继发不孕	0.18	≤24	22.7	女方因素	1	14.92	416	0.19	1	8.62	4.23	87.85	4	3	6.9	A	IVF	1	0	0	0	1	1	0	否	是	移植	未妊娠
2133	1	C00006738	贾希菊	≥35	46	4	刺激方案	1	328.846	＞10天	13	＞3000	4275	HCG	1	3	2	继发不孕	0.92	＞24	30.1	女方因素	1	17.22	404	0.28	1	5.99	4.85	68	4	6	8.5	A	IVF	0	0	1	0	1	1	0	否	是	移植	未妊娠
2136	1	C00012867	张艳明	≥35	47	4	刺激方案	1	322.5	≤10天	10	＞3000	3225	HCG	2	6	1	继发不孕	0.14	＞24	27.2	混合因素	1	8.96	396	0.58	1	16.25	4.55	24	4	3	6.9	A-B	ICSI	1	0	1	1	0	0	0	否	否	全胚冷冻
2138	1	2018010030	张树芹	≥35	47	2	刺激方案	1	300	＞10天	11	＞3000	3300	HCG	4	0	0	原发不孕	0.42	＞24	27.2	混合因素	1	14.17	390	0.71	#NULL!	17.47	7.16	22.8	4	3	8.5	A		0	0	0	0	0	0	0	是		未取卵
2139	1	C00004583	高洁	≥35	37	2	拮抗剂方案	2	306.25	＞10天	12	＞3000	3675	双扳机	3	2	0	继发不孕	0.5	＞24	25.8	女方因素	1	12.85	388	0.95	0	17.56	4.64	24	4	6	8	A		0	0	0	0	0	0	0	是		未取到卵
2142	1	2016050094	于艳艳	＜35	33	1	刺激方案	1	300	＞10天	12	＞3000	3600	HCG	3	2	1	继发不孕	0.98	≤24	21.7	女方因素	1	19.69	384	0.97	0	16.78	3.09	34.5	3	7	7.6	B		0	0	0	0	0	0	0	是		未取到卵
2148	1	C00009555	禇延苓	≥35	39	1	刺激方案	1	450	＞10天	11	＞3000	4950	HCG	1	4	0	继发不孕	1.66	≤24	22.9	女方因素	1	9.84	376	2.2	0	12.58	4.64	13	2	6	0.83	A-B		0	0	0	0	0	0	0	是		未取到卵
2150	1	2016040022	刘莹	＜35	28	1	降调节方案	3	292.5	≤10天	10	≤3000	2925	HCG	4	1	0	继发不孕	0.48	＞24	29.3	女方因素	1	5.83	373	0.72	0	9.8	5.89	86.43	3	3	12	A		0	0	0	0	0	0	0	是		未取到卵
2157	1	2016100004	张一蕾	≥35	43	1	刺激方案	1	308.333	≤10天	9	≤3000	2775	HCG	3	6	1	继发不孕	0.23	≤24	21.5	混合因素	1	12.14	352	1.68	3	11.58	3.41	77.07	4	4	8.4	A-B	ICSI	1	0	1	0	0	0	0	否	否	全胚冷冻
2170	1	2016110192	范桂秀	≥35	36	5	刺激方案	1	450	≤10天	6	≤3000	2700	HCG	4	1	1	继发不孕	0.7	＞24	31.2	男方因素	1	4.12	323	1.07	1	8.59	3.11	91	4	5	10.4	A	ICSI	0	0	0	0	0	0	0	是		未受精
2171	1	2016090127	卞艳艳	＜35	32	1	刺激方案	1	333.333	＞10天	18	＞3000	6000	HCG	2	0	0	原发不孕	0.18	＞24	27.3	女方因素	1	5.97	322	0.83	2	7.88	4.88	93.36	3	3	8	B	IVF	0	0	0	0	0	0	0	是		未受精
2175	1	C00008880	夏莉	≥35	43	1	拮抗剂方案	2	375	≤10天	4	≤3000	1500	HCG	1	1	0	继发不孕	0.07	≤24	23	混合因素	1	5.47	313	1.2	1	9.62	7.68	22	4	3	1.02	A-B	ICSI	0	0	1	0	1	1	0	否	是	移植	未妊娠
2176	1	2016120055	钟奕	≥35	45	3	刺激方案	1	423.214	＞10天	14	＞3000	5925	HCG	5	1	0	继发不孕	0.76	≤24	23.4	女方因素	1	2.43	312	0.72	1	16.78	4.23	35	4	3	10	A-B	IVF	1	0	0	0	0	0	0	是		无可移植胚胎
2181	1	2017070210	左丽	≥35	36	1	降调节方案	3	364.286	≤10天	7	≤3000	2550	HCG	1	1	0	继发不孕	0.77	＞24	26.7	混合因素	1	17.73	304	3.78	0	16.73	2.41	56.89	4	5	7.7	A		0	0	0	0	0	0	0	是		未取到卵
2183	1	2016110264	郭海英	≥35	39	2	刺激方案	1	300	≤10天	6	≤3000	1800	HCG	2	3	1	继发不孕	0.43	＞24	24.9	女方因素	1	6.86	299	0.38	1	20.74	5.34	74	4	2	8.2	A	IVF	1	0	0	0	0	0	0	是		无可移植胚胎
2186	1	2017030231	王莲芹	≥35	45	1	刺激方案	1	341.667	≤10天	9	＞3000	3075	HCG	5	5	1	继发不孕	0.62	＞24	24.8	女方因素	1	13.9	289	0.16	#NULL!	4.37	2.77	34.76	4	3	4.9	B		0	0	0	0	0	0	0	是		未取卵
2187	1	2016100068	郭海英	≥35	39	1	刺激方案	1	313.636	＞10天	11	＞3000	3450	HCG	2	3	1	继发不孕	0.43	＞24	24.9	女方因素	1	4.03	288	1.28	0	20.74	5.34	74	4	2	8.8	B		0	0	0	0	0	0	0	是		未取到卵
2188	1	2018050222	吕彦娜	≥35	37	3	刺激方案	1	312.5	≤10天	6	≤3000	1875	HCG	2	5	3	继发不孕	0.43	＞24	25.7	女方因素	1	2.3	287	0.42	1	11.26	4.01	43	4	6	8	B	IVF	0	0	0	0	0	0	0	是		无可移植胚胎
2199	1	C00015421	杨晓棠	≥35	36	1	降调节方案	3	355.263	＞10天	19	＞3000	6750	HCG	3	2	0	继发不孕	3.2	＞24	27.3	混合因素	1	0.72	259	0.56	1	4.55	8.14	31	2	28	9.3	B	ICSI	1	0	1	0	0	0	0	否	否	全胚冷冻
2201	1	C00012864	王宝玉	≥35	44	7	刺激方案	1	292.188	＞10天	16	＞3000	4675	HCG	2	3	1	继发不孕	0.11	≤24	23	混合因素	1	16.25	258	0.6	0	17.34	6.96	90.21	4	2	5.1	B		0	0	0	0	0	0	0	是		未取到卵
2203	1	2016070029	梁夫芝	≥35	44	1	刺激方案	1	450	≤10天	8	＞3000	3600	HCG	3	4	1	继发不孕	0.56	＞24	26.7	女方因素	1	1.5	253	0.94	1	10.15	5.5	29.09	4	3	10	A-B	IVF	1	0	0	0	0	0	0	是		无可移植胚胎
2208	1	2016090184	袁红彬	≥35	45	4	降调节方案	3	428.571	≤10天	7	≤3000	3000	HCG	5	6	1	继发不孕	0.2	＞24	24.4	混合因素	1	32.95	245	1.4	2	7.32	6	52	4	3	7.2	B-C	ICSI	3	0	2	1	0	0	0	否	否	全胚冷冻
2210	1	C00008419	张艳明	≥35	46	1	拮抗剂方案	2	480.357	＞10天	14	＞3000	6725	双扳机	1	6	1	继发不孕	0.08	＞24	27.2	女方因素	1	4.02	242	0.75	0	16.59	4.77	10	4	3	0.68	B		0	0	0	0	0	0	0	是		未取到卵
2212	1	2018060016	焦念丰	≥35	48	2	拮抗剂方案	2	321.429	≤10天	7	≤3000	2250	双扳机	1	3	1	继发不孕	0.16	≤24	23.7	女方因素	1	3.58	236	0.61	0	13.03	2.88	52	4	3	7.8	A		0	0	0	0	0	0	0	是		未取到卵
2213	1	2017110190	高玉香	≥35	46	4	刺激方案	1	375	＞10天	14	＞3000	5250	HCG	3	2	1	继发不孕	0.6	＞24	24.2	女方因素	1	8.68	230	0.66	1	11.89	4.82	95.42	4	4	5.6	B	IVF	0	0	0	0	0	0	0	是		无可移植胚胎
2218	1	C00013242	韩金红	＜35	31	1	降调节方案	3	358.929	＞10天	14	＞3000	5025	HCG	3	0	0	原发不孕	0.28	＞24	27	女方因素	1	15.39	208	2.47	#NULL!	13	2.99	48	3	5	11.5	A-B		0	0	0	0	0	0	0	是		未取卵
2226	1	2017030310	池汶娟	≥35	35	1	降调节方案	3	325	＞10天	12	＞3000	3900	HCG	1	2	1	继发不孕	1.3	≤24	23.4	混合因素	1	9.77	175	3.67	0	8.6	3.75	59.09	2	8	11	A		0	0	0	0	0	0	0	是		未取到卵
2228	1	2018030212	于静	≥35	37	4	刺激方案	1	472.5	≤10天	10	＞3000	4725	双扳机	3	0	0	原发不孕	0.73	≤24	23.6	混合因素	1	6.34	169	0.71	3	8.93	2.69	41.75	4	6	8.9	A	ICSI	1	0	1	0	0	0	0	否	否	全胚冷冻
2231	1	C00008634	王凤麟	≥35	46	1	拮抗剂方案	2	581.25	≤10天	8	＞3000	4650	HCG	0	1	0	继发不孕	0.09	＞24	25.4	混合因素	1	4.88	156	0.04	1	5.23	6.39	54.65	4	3	0.99	B	ICSI	1	0	1	0	1	1	0	否	是	移植	未妊娠
2237	1	C00012200	孔宪玲	≥35	38	1	刺激方案	1	300	≤10天	8	≤3000	2400	HCG	1	1	1	继发不孕	0.3	≤24	23.5	混合因素	1	13.54	228	1.3	0	9.57	2.74	54	4	3	0.45	A-B		0	0	0	0	0	0	0	是		未取到卵
2248	1	2017050004	赵丙兰	≥35	42	2	刺激方案	1	341.667	≤10天	9	＞3000	3075	HCG	1	5	2	继发不孕	0.94	＞24	24.6	女方因素	1	5.11	463.5	0.39	1	12.68	6.3	65.42	4	5	16.8	B	IVF	1	0	1	1	0	0	0	否	否	全胚冷冻
2252	1	2017060042	李晓	＜35	27	1	拮抗剂方案	2	332.143	≤10天	7	≤3000	2325	HCG	4	2	0	继发不孕	0.51	≤24	22.2	混合因素	1	9.65	433	2.5	1	15.2	3.82	18	3	2	7			0	0	0	0	0	0	0	是		未行授精
2256	1	2017100221	孟凡芝	≥35	45	4	刺激方案	1	375	≤10天	7	≤3000	2625	HCG	4	2	1	继发不孕	0.42	＞24	24.9	混合因素	1	9.35	340	0.5	#NULL!	8.64	6.5	47.4	4	4	#NULL!		ICSI	1	0	1	0	0	0	0	否	否	全胚冷冻
2257	1	2018040280	任晓军	≥35	44	6	拮抗剂方案	2	319.231	＞10天	13	＞3000	4150	双扳机	3	1	1	继发不孕	0.21	≤24	19.8	女方因素	1	17.48	339	1.09	0	16.6	4.37	88.08	4	2	#NULL!			0	0	0	0	0	0	0	是		未取到卵
2258	1	2018010093	王春青	≥35	44	2	刺激方案	1	300	≤10天	9	≤3000	2700	HCG	3	5	1	继发不孕	1.54	≤24	23.4	不明原因	4	18.64	939	0.61	5	7.77	3.05	38	2	11	#NULL!		ICSI	4	0	2	0	0	0	0	否	否	全胚冷冻
2266	1	2016020012	宁尚玉	＜35	32	1	降调节方案	3	300	≤10天	9	≤3000	2700	HCG	5	1	0	原发不孕	1.64	＞24	25.6	女方因素	7	4.12	1323	1.07	7	6.81	3.48	50.5	1	9	#NULL!		IVF	3	0	3	3	2	2	0	否	是	移植	已妊娠	临床妊娠	宫内妊娠	单胎宫内妊娠
2272	1	C00011921	柳雅	≥35	42	5	刺激方案	1	403.125	＞10天	16	＞3000	6450	HCG	16	0	0	原发不孕	0.14	＞24	28.6	混合因素	2	2.43	412	0.72	2	9.46	3.42	39	4	4	#NULL!		ICSI	1	0	0	0	0	0	0	是		无可移植胚胎
2280	1	2017050204	张春艳	＜35	32	5	降调节方案	3	303.704	＞10天	27	＞3000	8200	HCG	6	0	0	原发不孕	0.41	＞24	26.7	女方因素	1	2.51	235	1.31	0	8.98	3.21	41	3	3	#NULL!			0	0	0	0	0	0	0	是		未取到卵
243	0	2017110001	刘晓凤	＜35	26	3	刺激方案	1	225	≤10天	9	≤3000	2025	HCG	1	1	0	继发不孕	1.82	＞24	39	混合因素	7	11.64	1973	1.75	7	6.47	5.52	17	1	10	3.9	A	ICSI	5	0	4	2	0	0	0	否	否	全胚冷冻
1373	0	C00011998	王田田	＜35	27	1	降调节方案	3	187.5	≤10天	10	≤3000	1875	HCG	1	2	0	继发不孕	0.43	＞24	27.3	女方因素	3	9.28	468	1.16	2	10.61	5.99	20	3	5	6.8	A-B	IVF	0	0	0	0	0	0	0	是		无可移植胚胎
608	0	C00007080	张利娟	＜35	33	2	降调节方案	3	231.818	＞10天	11	≤3000	2550	HCG	6	1	1	继发不孕	2.05	≤24	22.9	男方因素	6	1.28	1453	0.28	6	8.22	5.39	77.07	1	12	1.36	A	ICSI	4	0	2	0	2	2	0	否	是	移植	已妊娠	临床妊娠	宫内妊娠	单胎宫内妊娠
947	0	C00015451	王广菊	≥35	45	1	拮抗剂方案	2	225	≤10天	10	≤3000	2250	HCG	2	2	2	继发不孕	0.97	＞24	27.6	女方因素	4	3.66	730	0.53	4	13.8	3.1	32	4	9	0.93	A	IVF	4	1	2	0	1	1	0	否	是	移植	未妊娠
2020	0	2017080163	李红	≥35	45	1	拮抗剂方案	2	241.667	≤10天	9	≤3000	2175	HCG	11	4	0	原发不孕	0.48	＞24	31.3	混合因素	1	24.39	771	0.69	#NULL!	9.48	2.31	99.09	4	3	6.8	A-B		0	0	0	0	0	0	0	是		未取卵
1950	0	C00004955	张欣彦	≥35	36	1	降调节方案	3	225.735	＞10天	17	＞3000	3837.5	HCG	2	2	1	继发不孕	1.2	≤24	22.1	女方因素	2	0.3	506	0.8	3	11.82	5.74	82	2	8	11.9	B	IVF	3	1	2	0	0	0	0	否	否	全胚冷冻
350	0	2016090169	李莹	≥35	40	1	降调节方案	3	262.5	＞10天	12	＞3000	3150	HCG	6	0	0	原发不孕	1.47	＞24	26.3	女方因素	7	2.18	1854	0.51	7	9.44	5.89	80.74	2	11	12	A-B	IVF	5	0	4	3	2	2	0	否	是	移植	已妊娠	临床妊娠	宫内妊娠	单胎宫内妊娠
310	0	C00004421	李秀芳	≥35	41	2	降调节方案	3	236.538	＞10天	13	＞3000	3075	HCG	2	2	1	继发不孕	1.2	≤24	20.8	女方因素	7	0.68	2253	1.31	7	8.58	2.48	59.09	2	8	11.9	A-B	IVF	4	2	2	0	0	0	0	否	否	全胚冷冻
2214	0	2016090013	左云芳	≥35	45	4	刺激方案	1	225	≤10天	4	≤3000	900	HCG	1	3	1	继发不孕	0.74	≤24	22.1	女方因素	1	7.85	226	0.51	1	19.78	6.22	40.37	4	2	6.3	B	IVF	0	0	1	0	0	0	0	否	否	全胚冷冻
594	0	2018030162	张莉	≥35	35	4	降调节方案	3	277.5	≤10天	10	≤3000	2775	HCG	11	0	0	原发不孕	1.62	≤24	21.6	不明原因	6	1.34	1548	3.12	6	5.15	4.55	59.09	2	8	13.1	A	IVF	6	0	4	2	0	0	0	否	否	全胚冷冻
178	0	C00016567	张凤红	≥35	42	2	降调节方案	3	240	≤10天	10	≤3000	2400	HCG	7	3	1	继发不孕	1.57	＞24	24.6	女方因素	8	2.88	2345	0.86	6	6.51	3.71	47	2	20	13.2	A	IVF	4	1	2	1	1	1	0	否	是	移植	未妊娠
1885	0	2017060281	吴晓丽	≥35	42	1	刺激方案	1	192.857	≤10天	7	≤3000	1350	HCG	2	2	1	继发不孕	0.90	＞24	25.6	女方因素	6	10.73	1227	0.79	7	17.37	3.22	45.05	4	9	4	B	IVF	6	0	4	0	0	0	0	否	否	全胚冷冻
63	0	2016090059	王丽	＜35	30	1	降调节方案	3	232.5	≤10天	10	≤3000	2325	HCG	3	0	0	原发不孕	2.92	≤24	24	女方因素	9	2.55	2640	2.86	5	7.05	2.8	43	1	15	2.8		IVF	3	0	2	0	0	0	0	否	否	全胚冷冻
1563	0	2017070070	陈娟	≥35	39	4	刺激方案	1	266.667	≤10天	9	≤3000	2400	HCG	2	1	1	继发不孕	1.66	＞24	29	男方因素	3	8.69	1103	0.35	3	7.09	8.61	46.43	2	5	6.5	B	ICSI	3	0	2	0	0	0	0	否	否	全胚冷冻
1116	0	C00007561	廖淑芳	≥35	43	1	刺激方案	1	287.5	＞10天	12	＞3000	3450	HCG	3	1	1	继发不孕	1.2	＞24	30.4	女方因素	4	4.52	1390	0.67	5	6.54	5.09	47	2	8	0.68	B-C	IVF	2	0	2	1	0	0	0	否	否	全胚冷冻
937	0	C00005602	孟颜	≥35	37	1	刺激方案	1	150	≤10天	5	≤3000	750	双扳机	2	4	1	继发不孕	1.12	＞24	28	女方因素	4	9.18	823	1.64	4	11.82	4.59	17.33	4	6	8.4	B	IVF	2	0	2	0	0	0	0	否	否	全胚冷冻
1657	0	2017030239	赵健玲	≥35	42	2	刺激方案	1	275	＞10天	12	＞3000	3300	HCG	3	1	1	继发不孕	1.12	＞24	26.3	混合因素	2	4.16	848	1.15	0	8.2	3.6	59.09	4	5	8	B		0	0	0	0	0	0	0	是		未取到卵
332	0	C00018270	郭爽爽	＜35	33	1	降调节方案	3	195	≤10天	10	≤3000	1950	HCG	2	0	0	原发不孕	1.58	＞24	25.2	女方因素	7	3.79	2036.82	0.77	5	5.73	5.01	36.43	1	8	10.2	A	IVF	4	0	2	1	2	2	0	否	是	移植	未妊娠
953	0	C00018006	邢卿	＜35	31	3	拮抗剂方案	2	200	≤10天	9	≤3000	1800	HCG	2	1	0	继发不孕	2.86	≤24	18.1	女方因素	4	6.01	676	0.84	4	12.19	7.34	72	1	11	11.6	A	IVF	4	0	4	2	2	2	0	否	是	移植	已妊娠	临床妊娠	宫内妊娠	单胎宫内妊娠
2147	0	2018050045	吴迷勇	≥35	41	1	降调节方案	3	248.077	＞10天	13	＞3000	3225	双扳机	3	1	1	继发不孕	0.88	＞24	25.4	女方因素	1	13.58	376	0.88	1	8.86	4.1	34.78	4	6	12.9	B	IVF	0	0	0	0	0	0	0	是		未受精
526	0	C00018146	胡传凤	＜35	34	1	拮抗剂方案	2	281.25	≤10天	8	≤3000	2250	HCG	9	2	1	继发不孕	2.89	≤24	23.5	女方因素	6	6.04	2184.3	1.18	7	5.24	4.7	28.14	1	13	16.6	A	IVF	5	0	4	2	0	0	0	否	否	全胚冷冻
371	0	C00015710	盖向荣	≥35	36	1	降调节方案	3	286.364	＞10天	11	＞3000	3150	HCG	1	2	1	继发不孕	2.5	≤24	21	女方因素	7	1.67	1694	1.98	8	7.06	8.21	33.6	2	22	11.5	A	IVF	7	0	2	1	2	2	0	否	是	移植	已妊娠	临床妊娠	宫内妊娠	单胎宫内妊娠
416	0	2017050137	王素梅	≥35	37	1	降调节方案	3	179.545	＞10天	11	≤3000	1975	HCG	9	0	0	原发不孕	2.25	≤24	23.9	女方因素	7	1.21	1151	0.59	5	6.79	5.46	84.41	2	8	11.5	A	IVF	2	0	2	0	2	2	0	否	是	移植	已妊娠	临床妊娠	宫内妊娠	单胎宫内妊娠
351	0	2016050070	赵佳	≥35	35	1	降调节方案	3	285.577	＞10天	13	＞3000	3712.5	HCG	8	2	0	继发不孕	1.34	＞24	24.3	女方因素	7	2.72	1852	0.76	6	7.06	5.89	80.74	2	8	13	A-B	IVF	1	0	1	0	0	0	0	否	否	全胚冷冻
1715	0	2018060130	李涵	＜35	34	5	刺激方案	1	225	≤10天	6	≤3000	1350	HCG	6	0	0	原发不孕	1.02	＞24	25.7	女方因素	2	4.14	719	0.34	2	10.7	4.36	87.09	3	6	11.5	A-B	IVF	2	0	1	0	0	0	0	否	否	全胚冷冻
928	0	2017050047	李菁菁	＜35	30	2	降调节方案	3	262.5	≤10天	8	≤3000	2100	HCG	2	2	1	继发不孕	1.72	＞24	25.3	女方因素	4	1.82	877	0.84	3	5.21	5.22	56.43	1	10	11.3	C	IVF	2	0	2	1	2	2	0	否	是	移植	已妊娠	临床妊娠	宫内妊娠	单胎宫内妊娠
1548	0	2016010089	孙玉霞	≥35	45	4	刺激方案	1	150	≤10天	6	≤3000	900	HCG	2	3	1	继发不孕	0.29	＞24	25.7	混合因素	3	12.27	1161	1.48	3	15.34	5.85	45.42	4	4	8.4	B	ICSI	1	0	1	0	0	0	0	否	否	全胚冷冻
964	0	2017060071	陈春梅	≥35	37	1	刺激方案	1	225	≤10天	10	≤3000	2250	HCG	3	3	2	继发不孕	3.18	＞24	25.1	女方因素	4	14.73	1404	2.45	5	7.27	3.18	42.05	2	8	8	A	IVF	4	0	2	0	0	0	0	否	否	全胚冷冻
2023	0	2016120234	孙燕	≥35	42	1	刺激方案	1	193.75	＞10天	12	≤3000	2325	HCG	1	4	1	继发不孕	0.2	＞24	25.6	女方因素	1	2.79	743	0.87	2	13.75	4.17	65	4	3	8	B	IVF	1	0	1	1	0	0	0	否	否	全胚冷冻
62	0	2018070145	焦贵玲	≥35	36	1	降调节方案	3	286.364	＞10天	11	＞3000	3150	HCG	4	2	1	继发不孕	2.77	＞24	24.2	女方因素	9	1.96	2661	1.18	8	10.72	4.01	41.75	2	14	11.5	A	IVF	4	1	3	0	2	2	0	否	是	移植	已妊娠	临床妊娠	宫内妊娠	单胎宫内妊娠
1331	0	2018060102	翟婉婉	＜35	28	1	降调节方案	3	156.25	＞10天	12	≤3000	1875	HCG	2	2	0	继发不孕	2.47	＞24	25.3	女方因素	3	1.37	657	0.59	4	5.94	6.85	33.77	1	20	1.4	B	IVF	0	1	1	0	0	0	0	否	否	全胚冷冻
581	0	2018030132	田敏	≥35	36	2	拮抗剂方案	2	225	≤10天	10	≤3000	2250	HCG	5	1	1	继发不孕	1.28	≤24	20.8	不明原因	6	3.73	1631	1.3	4	6.19	5.93	40	2	9	10.3	A	ICSI	4	0	2	1	1	1	0	否	是	移植	未妊娠
2027	0	C00018605	李秀梅	≥35	40	4	刺激方案	1	150	≤10天	8	≤3000	1200	HCG	6	2	1	继发不孕	0.22	＞24	24.8	混合因素	1	22.66	727.68	1.04	1	14.86	6.02	62	4	2	4.6	B	ICSI	1	0	0	0	0	0	0	是		无可移植胚胎
76	0	2016020143	彭春霞	≥35	38	3	降调节方案	3	258.75	≤10天	10	≤3000	2587.5	HCG	4	2	1	原发不孕	2.21	＞24	26.6	女方因素	9	0.51	2344	0.61	7	8.86	4.68	42	2	16	9.4	A	IVF	7	0	4	0	2	2	0	否	是	移植	已妊娠	临床妊娠	宫内妊娠	单胎宫内妊娠
592	0	2016090157	张红霞	≥35	47	2	刺激方案	1	225	≤10天	8	≤3000	1800	HCG	3	3	1	继发不孕	0.21	＞24	25.3	女方因素	6	0.76	1555	0.64	7	14.22	4.69	99.09	4	4	13.5	A	IVF	6	0	4	2	2	2	0	否	是	移植	未妊娠
1513	0	C00011109	李香纷	＜35	29	1	刺激方案	1	225	≤10天	7	≤3000	1575	HCG	2	0	0	原发不孕	2.64	≤24	20.3	女方因素	3	3.99	877	0.5	5	13.72	4.11	46	1	11	9.2	A	IVF	2	0	2	0	2	2	0	否	是	移植	已妊娠	临床妊娠	宫内妊娠	双胎宫内妊娠
96	0	2017060274	齐雯雯	＜35	31	1	降调节方案	3	248.214	＞10天	21	＞3000	5212.5	HCG	4	0	0	原发不孕	2.26	≤24	22.2	女方因素	9	1.65	1936	0.56	9	7.07	5.12	49	1	31	10	B	IVF	3	0	2	1	0	0	0	否	否	全胚冷冻
2049	0	2017120015	崔秀珍	≥35	38	1	拮抗剂方案	2	280	＞10天	15	＞3000	4200	双扳机	2	1	0	继发不孕	0.89	≤24	23.6	混合因素	1	5.41	654	0.76	2	12.75	9.33	39.46	4	6	8.4	A	ICSI	0	0	0	0	0	0	0	是		无可移植胚胎
154	0	C00015050	段玉杰	≥35	40	1	拮抗剂方案	2	285	≤10天	10	≤3000	2850	HCG	1	5	1	继发不孕	2.17	≤24	23.4	女方因素	8	3.11	1883	0.53	7	6.41	3.59	47	2	13	11	A-B	IVF	5	0	4	1	2	2	0	否	是	移植	已妊娠	生化妊娠	生化妊娠	生化妊娠
1421	0	2017110012	杨金红	≥35	41	1	刺激方案	1	275	＞10天	12	＞3000	3300	HCG	3	4	1	继发不孕	0.17	≤24	21.8	不明原因	3	7.77	974	0.39	1	8.72	3.53	73	4	4	6.3	A-B	IVF	1	0	0	0	0	0	0	是		无可移植胚胎
185	0	2017050020	郝玉华	＜35	32	3	降调节方案	3	238.636	＞10天	11	≤3000	2625	HCG	2	0	0	原发不孕	2.29	＞24	24.7	男方因素	8	1.39	2232	0.54	9	6.94	4.01	29	1	24	12.8	A	ICSI	8	0	2	0	0	0	0	否	否	全胚冷冻
2060	0	2017020035	张丽华	≥35	40	2	刺激方案	1	231.818	＞10天	11	≤3000	2550	HCG	3	2	1	继发不孕	0.32	＞24	28.3	混合因素	1	6.06	609	1.23	2	8.57	3.01	59	4	4	7.4	B	ICSI	2	0	2	1	0	0	0	否	否	全胚冷冻
814	0	C00008514	公晓琳	＜35	32	3	降调节方案	3	225	≤10天	10	≤3000	2250	HCG	1	1	0	继发不孕	3.08	≤24	24	女方因素	5	0.89	1545	1.04	6	7.79	6.45	82.82	1	20	13	A-B	IVF	6	0	3	0	2	2	0	否	是	移植	未妊娠
1535	0	C00019142	马姣姣	＜35	24	2	刺激方案	1	281.25	＞10天	12	＞3000	3375	HCG	2	1	0	继发不孕	1.41	＞24	29.3	混合因素	3	3.63	1206.81	1.27	3	7.16	7.26	85.18	1	11	6.4	B	ICSI	1	0	0	0	0	0	0	是		无可移植胚胎
655	0	2016060107	王燕	≥35	37	3	降调节方案	3	225	≤10天	8	≤3000	1800	HCG	2	3	1	继发不孕	0.92	＞24	25.3	女方因素	5	1.14	1685	0.3	4	5.99	4.94	55.42	4	7	10.2	A	IVF	4	0	2	0	2	2	0	否	是	移植	未妊娠
59	0	2018040080	曹静	≥35	37	1	降调节方案	3	265	＞10天	15	＞3000	3975	HCG	3	1	1	继发不孕	1.9	＞24	27.3	女方因素	9	2.38	2800	0.88	4	10.88	6.96	66.43	2	7	15.8	A-B	IVF	1	0	0	0	0	0	0	是		无可移植胚胎
969	0	2017080215	刘美红	≥35	39	2	刺激方案	1	187.5	≤10天	8	≤3000	1500	HCG	2	3	1	继发不孕	3.47	≤24	18.8	女方因素	4	11.63	1390	1.04	5	12.13	8.84	39.46	2	9	6	C	IVF	2	0	2	1	0	0	0	否	否	全胚冷冻
1065	0	2017030190	郭璟	≥35	41	3	降调节方案	3	287.5	＞10天	12	＞3000	3450	HCG	5	1	1	继发不孕	0.35	≤24	20.2	混合因素	4	2.42	1624	1.48	3	9.7	3.83	95.42	4	5	9.7	A	ICSI	2	0	2	2	2	2	0	否	是	移植	未妊娠
1220	0	2018060170	田超清	≥35	38	4	刺激方案	1	267.857	＞10天	14	＞3000	3750	HCG	11	0	0	原发不孕	1.94	≤24	19	男方因素	4	9.17	1129	0.81	4	8.1	6.45	42	2	10	6.8	A-B	IVF	2	0	2	0	0	0	0	否	否	全胚冷冻
2086	0	C00017938	马文爽	≥35	35	1	刺激方案	1	150	＞10天	11	≤3000	1650	HCG	7	0	0	原发不孕	1.2	≤24	18.7	混合因素	1	3.67	502	0.49	1	7.23	5.13	69.09	2	5	7.5	B	ICSI	1	0	1	0	0	0	0	否	否	全胚冷冻
940	0	2016040293	李海风	≥35	39	2	降调节方案	3	225	＞10天	11	≤3000	2475	HCG	3	1	0	继发不孕	1.96	＞24	25.7	女方因素	4	1.21	811	0.42	5	9.35	2.19	34	2	9	9	A	IVF	4	0	2	1	2	2	0	否	是	移植	未妊娠
1086	0	C00004246	程小玲	≥35	45	1	刺激方案	1	225	≤10天	7	≤3000	1575	HCG	8	0	0	继发不孕	1.89	＞24	30.5	女方因素	4	5.64	1498	1.03	3	12.94	3.38	47	2	7	0.62	A	IVF	0	0	0	0	0	0	0	是		无可移植胚胎
610	0	C00013038	周萍	≥35	39	1	降调节方案	3	265.909	＞10天	11	≤3000	2925	HCG	3	2	1	继发不孕	1.91	＞24	26	女方因素	6	1.94	1414	1.35	5	6.73	2.68	50	2	9	1.46	A	IVF	4	0	2	1	0	0	0	否	否	全胚冷冻
800	0	2016080023	李宁	≥35	45	1	刺激方案	1	272.368	＞10天	19	＞3000	5175	HCG	1	0	0	继发不孕	0.81	≤24	22.6	女方因素	5	2.22	1624	1.99	4	5.71	3.17	50.1	4	5	8.2	A-B	IVF	3	0	2	0	0	0	0	否	否	全胚冷冻
1243	0	2018020098	董云娟	≥35	44	1	刺激方案	1	233.333	≤10天	9	≤3000	2100	HCG	1	2	0	继发不孕	0.14	≤24	22.6	女方因素	3	11.79	930	1.04	5	7.9	4.7	89	4	7	6.9	B	IVF	1	0	1	0	0	0	0	否	否	全胚冷冻
149	0	2016090047	史明燕	＜35	28	1	降调节方案	3	150	＞10天	11	≤3000	1650	HCG	1	2	0	继发不孕	2.28	≤24	19.8	女方因素	8	1.23	2005	0.76	9	11.21	6.32	58.72	1	15	11.4	A	IVF	8	0	4	0	2	2	0	否	是	移植	已妊娠	临床妊娠	宫内妊娠	单胎宫内妊娠
2180	0	C00005438	孔娟	≥35	38	1	刺激方案	1	150	≤10天	5	≤3000	750	HCG	1	2	0	继发不孕	2.26	≤24	22	女方因素	1	4.69	306	0.24	1	8.4	2.8	35	2	6	7.9	A-B	IVF	0	1	1	0	0	0	0	否	否	全胚冷冻
493	0	C00005237	许桂莹	＜35	33	2	降调节方案	3	247.5	≤10天	10	≤3000	2475	HCG	1	0	0	原发不孕	2.95	＞24	27.7	女方因素	6	1.27	2536	1.07	8	5.68	4.01	60	1	20	12.1	A	IVF	6	0	3	0	2	2	0	否	是	移植	已妊娠	临床妊娠	宫内妊娠	双胎宫内妊娠
827	0	2017090180	韩丽萍	≥35	45	7	降调节方案	3	288.462	＞10天	13	＞3000	3750	HCG	7	0	0	原发不孕	0.83	＞24	26	混合因素	5	1.93	1452	0.51	2	6.37	6.35	26	4	7	11.5	A	ICSI	1	0	1	0	0	0	0	否	否	全胚冷冻
1943	0	2017100063	师吉艳	≥35	42	1	刺激方案	1	150	≤10天	8	≤3000	1200	HCG	1	4	1	继发不孕	0.85	≤24	21.6	女方因素	2	7.74	393	0.68	1	12.39	5.55	28	4	3	5.3	B	IVF	1	0	1	0	0	0	0	否	否	全胚冷冻
1012	0	C00011127	刘茜茜	＜35	30	1	刺激方案	1	225	≤10天	7	≤3000	1575	HCG	1	0	0	原发不孕	1.93	≤24	18.7	女方因素	4	15.97	1228	1.65	3	5.75	7.99	65.76	1	7	9.6	B	IVF	1	0	1	0	0	0	0	否	否	全胚冷冻
787	0	2017030158	张兰	≥35	40	3	降调节方案	3	205	≤10天	10	≤3000	2050	HCG	17	0	0	原发不孕	2.680	≤24	19.5	混合因素	5	4.2	1692	0.54	5	8.18	4.97	73.7	2	10	11.3	A	ICSI	3	0	2	0	2	2	0	否	是	移植	未妊娠
267	0	C00018491	朱红梅	≥35	35	1	拮抗剂方案	2	225	＞10天	11	≤3000	2475	HCG	3	3	2	继发不孕	2.81	≤24	20.8	女方因素	7	5.39	2399	1.67	4	5.89	4.13	51.87	2	16	8.6	A	IVF	1	0	0	0	0	0	0	是		无可移植胚胎
1851	0	2018050057	闫春华	≥35	36	1	刺激方案	1	225	≤10天	7	≤3000	1575	HCG	3	1	1	继发不孕	1.80	＞24	27	女方因素	2	8.88	422	0.5	3	10.4	4.91	93.36	2	7	8.4	A	IVF	1	0	1	0	0	0	0	否	否	全胚冷冻
119	0	C00018724	李晓	＜35	25	1	降调节方案	3	253.125	≤10天	8	≤3000	2025	HCG	1	0	0	原发不孕	2.54	＞24	35.8	女方因素	9	1.9	1274.16	0.96	9	6.42	4.21	41.49	1	18	17.8	A-B	IVF	6	0	4	0	0	0	0	否	否	全胚冷冻
127	0	C00004477	崔连芳	＜35	27	2	降调节方案	3	272.222	≤10天	9	≤3000	2450	HCG	1	0	0	原发不孕	1.70	≤24	23.6	混合因素	8	0.71	1947	2.04	6	7.14	3.33	32.34	1	10	12.7	A	ICSI	5	0	2	0	0	0	0	否	否	全胚冷冻
335	0	2017020208	李申美	≥35	37	3	降调节方案	3	187.5	≤10天	10	≤3000	1875	HCG	1	1	0	继发不孕	4.02	≤24	22.8	混合因素	7	0.96	2009	0.87	9	5.45	4.23	64	2	20	18.7	A	ICSI	5	0	2	0	2	2	0	否	是	移植	未妊娠
1022	0	C00006271	任丽云	≥35	40	1	刺激方案	1	225	≤10天	8	≤3000	1800	双扳机	3	1	0	继发不孕	1.7	≤24	19.9	女方因素	4	3.77	1185	0.52	6	8.17	5.99	81	2	10	0.72	B	IVF	3	0	4	1	0	0	0	否	否	全胚冷冻
1455	0	2017050085	王海芳	≥35	45	1	刺激方案	1	225	≤10天	8	≤3000	1800	HCG	1	0	0	继发不孕	0.59	＞24	26.4	女方因素	3	1.84	891.83	0.9	3	7.61	6.98	40	4	7	11.8	B	IVF	2	0	1	0	0	0	0	否	否	全胚冷冻
2029	0	2017080083	熊巩莹	＜35	27	3	刺激方案	1	150	＞10天	11	≤3000	1650	HCG	4	1	0	继发不孕	0.39	＞24	27.1	女方因素	1	34.98	718	1.17	0	14.28	5.05	65	3	5	5.1	B		0	0	0	0	0	0	0	是		未取到卵
1855	0	C00009465	李永菊	≥35	47	1	刺激方案	1	150	≤10天	4	≤3000	600	HCG	3	5	1	继发不孕	0.20	＞24	24.5	混合因素	2	30.93	412	0.81	#NULL!	11.26	4.15	67.78	4	3	14.9	A		0	0	0	0	0	0	0	是		未取卵
331	0	2017100171	曹德红	≥35	37	1	降调节方案	3	170.455	＞10天	11	≤3000	1875	HCG	6	1	1	继发不孕	1.89	≤24	22.6	混合因素	7	1.27	2038	0.71	8	6.89	5.25	49	2	12	15.7	A	ICSI	5	0	2	0	2	2	0	否	是	移植	未妊娠
1727	0	C00011675	李婷	≥35	42	2	刺激方案	1	256.25	＞10天	12	＞3000	3075	HCG	1	3	1	继发不孕	1.17	≤24	24	女方因素	2	12.38	688	1.59	2	17.08	5.6	26	4	5	0.86	B	IVF	0	0	0	0	0	0	0	是		无可移植胚胎
75	0	C00010935	王金凤	≥35	38	3	刺激方案	1	182.143	≤10天	7	≤3000	1275	HCG	8	2	1	继发不孕	1.72	＞24	24.4	混合因素	9	28.42	2376	2.1	#NULL!	9.59	4.79	40	2	8	0.56			0	0	0	0	0	0	0	是		未取卵
1542	0	2017110165	辛欣	＜35	26	1	刺激方案	1	225	＞10天	11	≤3000	2475	HCG	2	0	0	原发不孕	1.26	≤24	19.5	女方因素	3	20.14	1171	1.49	2	8.58	5.6	80.6	1	8	6.3	A	IVF	2	0	1	0	0	0	0	否	否	全胚冷冻
1379	0	2018010016	李庆荣	＜35	34	1	刺激方案	1	234.375	≤10天	8	≤3000	1875	HCG	2	0	0	原发不孕	2.24	≤24	23	女方因素	3	17.31	386	1.35	2	8.48	6.23	59.09	1	6	4.4	A	IVF	2	0	2	0	0	0	0	否	否	全胚冷冻
1809	0	C00004678	江秀霞	≥35	43	7	拮抗剂方案	2	258.333	≤10天	9	≤3000	2325	双扳机	1	5	1	继发不孕	0.54	≤24	22	女方因素	2	1.5	530	0.28	1	5.97	6.84	38.25	4	2	11.1	B	IVF	1	0	1	1	1	1	0	否	是	移植	未妊娠
1375	0	2017030130	张静	≥35	38	1	刺激方案	1	150	≤10天	5	≤3000	750	HCG	9	0	0	原发不孕	1.05	＞24	29.4	混合因素	3	10.7	448	1.88	3	8.14	6.42	48.65	4	7	8.7	B	ICSI	3	0	2	0	0	0	0	否	否	全胚冷冻
1029	0	2016110011	郭英霞	≥35	40	1	拮抗剂方案	2	289.286	＞10天	14	＞3000	4050	HCG	1	2	1	继发不孕	1.45	＞24	30.8	女方因素	4	0.92	1147.22	1.53	6	6.61	3.21	29.09	2	11	8.3	A	IVF	4	0	0	0	0	0	0	是		无可移植胚胎
557	0	2016120215	刘芳琼	≥35	41	1	降调节方案	3	191.667	＞10天	12	≤3000	2300	HCG	3	4	1	继发不孕	2.47	≤24	20.5	女方因素	6	5.84	1855	1.29	4	10.67	4.72	48.65	2	9	11	A	IVF	1	0	1	0	1	1	0	否	是	移植	未妊娠
2202	0	C00004998	高成霞	≥35	36	1	刺激方案	1	162.5	≤10天	6	≤3000	975	HCG	1	3	1	继发不孕	1.66	＞24	25.7	女方因素	1	11.11	256	0.39	1	9.12	3.15	70.1	4	4	3.5		IVF	1	0	1	1	0	0	0	否	否	全胚冷冻
735	0	C00015747	于瑶	＜35	34	3	降调节方案	3	205	＞10天	15	＞3000	3075	HCG	4	2	1	继发不孕	2.66	≤24	17.9	男方因素	5	2.44	1470	0.51	7	7.85	6.62	46.98	1	11	8.5	A	ICSI	4	0	4	1	0	0	0	否	否	全胚冷冻
834	0	2016060067	马艺珲	＜35	31	1	刺激方案	1	201.923	＞10天	13	≤3000	2625	HCG	3	0	0	原发不孕	1.89	＞24	26.6	不明原因	5	1.94	1418	1.26	4	9.95	2.82	45.42	1	9	12.1	B	IVF	2	0	2	0	2	2	0	否	是	移植	已妊娠	临床妊娠	宫内妊娠	双胎宫内妊娠
538	0	C00015657	姜圆圆	＜35	34	1	拮抗剂方案	2	218.75	＞10天	12	≤3000	2625	双扳机	2	3	2	继发不孕	3.19	＞24	27.2	女方因素	7	7.69	1702	2.73	8	8.34	6.77	42.2	1	12	11	A	IVF	6	0	6	2	0	0	0	否	否	全胚冷冻
850	0	2018050113	薛芸	＜35	25	1	降调节方案	3	217.5	≤10天	10	≤3000	2175	HCG	3	0	0	原发不孕	1.61	≤24	22	女方因素	5	0.83	1302	0.96	6	6.15	4.61	39.09	1	10	11.5	A-B	IVF	4	0	1	0	0	0	0	否	否	全胚冷冻
88	0	C00010153	鞠元燕	＜35	31	1	拮抗剂方案	2	200	≤10天	9	≤3000	1800	HCG	5	0	0	原发不孕	1.33	＞24	28.9	女方因素	9	2.3	2095	1.09	9	6.54	6.7	78.65	1	15	1.43	A-B	IVF	5	0	2	0	2	2	0	否	是	移植	已妊娠	临床妊娠	宫内妊娠	单胚胎停
1683	0	C00016370	刘燕霞	≥35	39	1	拮抗剂方案	2	286.364	＞10天	11	＞3000	3150	HCG	3	2	0	继发不孕	1.31	＞24	28.4	女方因素	2	2.08	788	0.63	2	9.73	5.45	42	2	9	10	A	IVF	1	0	1	0	0	0	0	否	否	全胚冷冻
261	0	C00017129	陈莹莹	≥35	35	1	降调节方案	3	225	≤10天	8	≤3000	1800	HCG	5	2	1	继发不孕	2.49	＞24	28.5	女方因素	7	3.07	1560	0.91	6	6.47	2.61	34	2	16	6.1	A	IVF	3	0	1	0	1	1	0	否	是	移植	未妊娠
695	0	C00018316	李胜清	≥35	46	2	拮抗剂方案	2	288.462	＞10天	13	＞3000	3750	HCG	7	3	2	继发不孕	0.99	≤24	23.8	女方因素	5	2.39	1734	1.77	3	14.15	4.66	40	4	9	8.9	B	IVF	2	0	2	0	2	2	0	否	是	移植	未妊娠
300	0	C00006899	王雪	＜35	29	1	降调节方案	3	236.538	＞10天	13	＞3000	3075	HCG	3	2	0	继发不孕	2.41	≤24	20.8	女方因素	7	0.84	2660	1.19	7	8.5	2.5	35	1	17	0.92	A	IVF	3	1	3	0	0	0	0	否	否	全胚冷冻
1632	0	C00018456	毛毳	≥35	40	1	拮抗剂方案	2	225	≤10天	6	≤3000	1350	HCG	2	1	0	继发不孕	1.33	≤24	17.4	女方因素	2	13.24	906.19	1.8	2	7.98	6.49	47	2	8	10.5	A-B	IVF	0	0	0	0	0	0	0	是		无可移植胚胎
1381	0	2017060291	高乃珲	≥35	39	1	降调节方案	3	222.727	＞10天	11	≤3000	2450	HCG	1	0	0	原发不孕	0.45	≤24	20.8	女方因素	3	25.69	329	0.76	1	12.8	4.68	67.09	4	3	6.3	A	IVF	6	0	2	0	0	0	0	否	否	全胚冷冻
292	0	2017120074	张海燕	≥35	36	1	降调节方案	3	275	＞10天	11	＞3000	3025	HCG	3	0	0	原发不孕	1.77	≤24	19.5	女方因素	7	0.8	2770	1.57	5	5.86	4.65	49.09	2	10	13.4	A	IVF	1	0	1	0	1	1	0	否	是	移植	已妊娠	临床妊娠	宫内妊娠	单胚胎停
2	0	2017060026	丛婷婷	＜35	29	1	降调节方案	3	225	≤10天	9	≤3000	2025	HCG	6	0	0	继发不孕	2.89	＞24	26.6	女方因素	10	0.83	2737	0.48	5	9.95	5.61	39	1	12	10.3		IVF	4	0	4	0	2	2	0	否	是	移植	已妊娠	临床妊娠	宫内妊娠	单胚胎停
366	0	C00004286	徐传凤	＜35	31	1	降调节方案	3	183.333	≤10天	9	≤3000	1650	HCG	6	0	0	原发不孕	1.55	≤24	20.8	男方因素	7	1.59	1765	1.62	5	5.86	4.54	44	1	17	0.95	A	ICSI	4	0	1	0	1	1	0	否	是	移植	未妊娠
56	0	C00015466	李亚平	＜35	29	1	降调节方案	3	203.125	＞10天	12	≤3000	2437.5	HCG	1	0	0	原发不孕	1.5	≤24	24	女方因素	9	2.02	2819	1.3	7	4.64	7.95	39	1	22	12.2	A-B	IVF	4	0	2	0	2	2	0	否	是	移植	未妊娠
528	0	2018020067	陆婷婷	＜35	29	1	降调节方案	3	287.5	＞10天	12	＞3000	3450	HCG	2	1	0	继发不孕	1.48	≤24	21.5	女方因素	6	2.2	2159	1.3	6	6.62	4.43	50.1	1	10	10.6	A	IVF	5	0	2	0	2	2	0	否	是	移植	未妊娠
703	0	2016080222	邓祥红	≥35	40	2	降调节方案	3	225	＞10天	12	≤3000	2700	HCG	1	4	1	继发不孕	1.43	＞24	25.3	女方因素	5	10.06	1671	1.45	8	6.89	4.45	73.77	2	14	7.8	A	IVF	5	0	4	2	2	2	0	否	是	移植	已妊娠	临床妊娠	宫内妊娠	单胚胎停
277	0	2017090231	王颖	≥35	44	2	降调节方案	3	272.727	＞10天	11	≤3000	3000	HCG	1	3	1	继发不孕	0.7	＞24	24.9	混合因素	7	0.77	2128	1.32	7	8.16	8.76	43.77	4	9	11.4	A	ICSI	4	0	2	1	0	0	0	否	否	全胚冷冻
1710	0	C00018148	黄英	≥35	42	2	刺激方案	1	150	≤10天	8	≤3000	1200	HCG	5	1	1	继发不孕	0.16	＞24	25	混合因素	2	21.54	733.28	0.7	0	17.8	6.55	38	4	2	8.9	B		0	0	0	0	0	0	0	是		未取到卵
1312	0	2016070004	陈娟	≥35	38	1	刺激方案	1	281.25	＞10天	20	＞3000	5625	HCG	2	1	1	继发不孕	1.85	＞24	29	女方因素	3	1.76	729	0.36	2	7.09	8.61	86.43	2	11	8.9	B	IVF	1	0	0	0	0	0	0	是		无可移植胚胎
2085	0	C00017479	陈相风	≥35	42	1	刺激方案	1	243.75	≤10天	8	≤3000	1950	HCG	2	0	0	原发不孕	0.3	≤24	20.3	混合因素	1	20.7	507	1.25	2	8.95	5.34	66	4	4	7.9	B	ICSI	0	0	0	0	0	0	0	是		无可移植胚胎
743	0	2017120275	赵继婷	≥35	37	1	刺激方案	1	258.333	≤10天	9	≤3000	2325	HCG	1	2	1	继发不孕	2.05	≤24	21.5	女方因素	5	8.38	1434	1.13	6	7.92	3.3	95.42	2	13	7	B-C	IVF	2	0	1	0	0	0	0	否	否	全胚冷冻
38	0	C00005141	王俊霞	≥35	35	1	降调节方案	3	206.25	＞10天	12	≤3000	2475	HCG	1	2	0	继发不孕	1.57	≤24	22	男方因素	9	4.07	1322	0.59	7	4.78	4.49	43.5	2	11	10.9	A	ICSI	1	0	1	0	0	0	0	否	否	全胚冷冻
1580	0	C00015049	任玉翠	≥35	41	1	拮抗剂方案	2	241.667	≤10天	9	≤3000	2175	HCG	4	2	1	继发不孕	1.77	＞24	27.6	混合因素	3	17.85	1048	1.32	#NULL!	12.93	3.65	38	2	7	12.4	C		0	0	0	0	0	0	0	是		未取卵
2134	0	2016040132	黄理翠	＜35	31	1	刺激方案	1	225	≤10天	9	≤3000	2025	HCG	2	2	0	继发不孕	2.35	＞24	27.3	女方因素	1	2.11	397	0.78	0	7.28	2.66	36.43	1	8	10.8	A		0	0	0	0	0	0	0	是		未取到卵
354	0	2017080109	陶恒玉	＜35	30	1	降调节方案	3	177.273	＞10天	11	≤3000	1950	HCG	4	0	0	原发不孕	1.85	≤24	19.5	女方因素	7	3.96	1829	1.23	9	7.35	5.32	46.43	1	10	13.9	B	IVF	3	0	2	0	2	2	0	否	是	移植	已妊娠	临床妊娠	宫内妊娠	双胎宫内妊娠
955	0	C00015605	李敏	＜35	32	1	拮抗剂方案	2	225	≤10天	8	≤3000	1800	HCG	3	0	0	原发不孕	2.59	＞24	24.5	女方因素	4	3.05	653	1.06	4	9.72	6.98	41	1	10	0.95	A	IVF	2	0	2	1	2	2	0	否	是	移植	未妊娠
1451	0	2017070188	刘玉玲	≥35	39	3	刺激方案	1	225	≤10天	9	≤3000	2025	HCG	2	2	1	继发不孕	1.32	＞24	24.7	混合因素	3	8.6	903	0.58	3	12.9	2.9	40.37	2	7	6.2	A-B	ICSI	3	0	2	0	0	0	0	否	否	全胚冷冻
252	0	2016050253	史长红	≥35	40	1	拮抗剂方案	2	240.625	≤10天	8	≤3000	1925	HCG	1	3	1	继发不孕	1.68	≤24	23.6	女方因素	4	10.4	812	0.67	6	6.98	3.71	47.71	2	10	7.7	A	IVF	6	0	4	2	2	2	0	否	是	移植	已妊娠	临床妊娠	宫内妊娠	单胚胎停
832	0	C00018719	时春梅	≥35	41	1	拮抗剂方案	2	225	≤10天	8	≤3000	1800	HCG	1	3	2	继发不孕	1.81	≤24	22.6	女方因素	5	10.38	1426.56	1	3	8.73	2.06	46.2	2	9	11.7	B	IVF	1	0	1	1	1	1	0	否	是	移植	未妊娠
140	0	2016120165	李贞	≥35	38	1	刺激方案	1	200	≤10天	9	≤3000	1800	HCG	8	0	0	原发不孕	2.8	≤24	22.6	混合因素	8	1.78	2290	1.16	6	6.67	5.1	49	2	11	10	A-B	ICSI	5	0	2	0	2	2	0	否	是	移植	未妊娠
932	0	C00018933	郭玉环	≥35	38	1	拮抗剂方案	2	225	≤10天	7	≤3000	1575	HCG	10	1	0	继发不孕	1.52	＞24	26	女方因素	4	2.64	854.39	0.62	4	7.88	4.8	52	2	11	9.3	A	IVF	3	0	2	0	2	2	0	否	是	移植	未妊娠
455	0	C00008994	宗红	＜35	34	1	刺激方案	1	225	≤10天	7	≤3000	1575	HCG	5	1	1	继发不孕	2.68	≤24	23.1	女方因素	6	9.13	1746	1.27	6	8.04	5.78	34.78	1	9	0.57	B	IVF	3	0	2	0	0	0	0	否	否	全胚冷冻
400	0	2018020092	刘莉	＜35	27	1	降调节方案	3	150	≤10天	10	≤3000	1500	HCG	1	2	0	继发不孕	2.49	≤24	20.3	女方因素	8	1.31	1934	0.56	9	6.56	6.22	33.77	1	16	12.3	A	IVF	8	0	6	2	0	0	0	否	否	全胚冷冻
1148	0	2016080168	张伟丽	≥35	39	1	拮抗剂方案	2	247.5	≤10天	10	≤3000	2475	HCG	3	1	1	继发不孕	0.82	≤24	24	混合因素	4	6.69	1275	1	4	7.24	5.15	42.29	4	6	14.2	B	ICSI	3	0	3	1	0	0	0	否	否	全胚冷冻
1598	0	C00018865	于杨	＜35	34	3	拮抗剂方案	2	150	≤10天	7	≤3000	1050	HCG	3	1	0	继发不孕	1.5	≤24	20.5	女方因素	3	2.2	918	0.71	3	11	3.5	55	1	9	10	A-B	IVF	2	0	2	0	0	0	0	否	否	全胚冷冻
1231	0	2018020041	刘甜	＜35	28	1	降调节方案	3	225	＞10天	12	≤3000	2700	HCG	2	1	0	继发不孕	1.56	＞24	24.2	女方因素	3	3.16	967	1.06	3	8.51	4.38	93	1	8	11.1	A-B	IVF	3	0	2	0	2	2	0	否	是	移植	未妊娠
2169	0	C00006457	毕春莲	≥35	43	1	刺激方案	1	150	≤10天	5	≤3000	750	HCG	2	2	1	继发不孕	1.68	≤24	21.5	混合因素	1	35.37	323	0.88	#NULL!	10.59	5.44	13	2	9	6.6	A		0	0	0	0	0	0	0	是		未取卵
109	0	C00006052	孙静静	＜35	28	1	降调节方案	3	201.562	＞10天	16	＞3000	3225	HCG	2	0	0	原发不孕	1.58	＞24	27.1	女方因素	9	1.25	1837	0.67	5	3.58	5	37	1	32	9.2	A	IVF	4	0	1	1	1	1	0	否	是	移植	未妊娠
1594	0	C00008436	张学丽	≥35	36	1	拮抗剂方案	2	150	≤10天	7	≤3000	1050	HCG	5	2	1	继发不孕	1.34	≤24	20.2	女方因素	3	1.09	1004	0.03	1	7.48	3.54	91	2	9	5.9	B	IVF	0	0	1	0	0	0	0	否	否	全胚冷冻
949	0	C00005494	李媛媛	≥35	39	3	拮抗剂方案	2	225	≤10天	6	≤3000	1350	HCG	1	4	1	继发不孕	1.67	＞24	26.7	女方因素	4	1.59	708	1.55	5	5.98	2.24	31	2	8	11.2	A-B	IVF	1	0	0	0	0	0	0	是		无可移植胚胎
1703	0	C00011535	武文波	≥35	45	7	拮抗剂方案	2	196.154	＞10天	13	≤3000	2550	HCG	1	5	0	继发不孕	0.74	≤24	22.7	男方因素	2	5.67	748	0.7	1	10.54	3.14	48	4	3	0.56	A	ICSI	1	0	0	0	1	1	0	否	是	移植	未妊娠
373	0	C00015653	吴秀荣	≥35	42	1	拮抗剂方案	2	283.333	≤10天	9	≤3000	2550	HCG	1	5	0	继发不孕	1.33	≤24	24	女方因素	7	1.73	1651	0.64	7	9.62	3.63	43	2	9	10.9	A	IVF	1	0	0	0	0	0	0	是		无可移植胚胎
586	0	C00016408	张怡	＜35	33	1	拮抗剂方案	2	200	≤10天	7	≤3000	1400	HCG	2	1	1	继发不孕	1.77	≤24	23.6	女方因素	6	2.67	1595	1.76	4	7.96	2.94	26.43	1	7	8.7	A	IVF	4	0	4	1	0	0	0	否	否	全胚冷冻
809	0	2017110263	丁秋凤	≥35	40	1	拮抗剂方案	2	235.909	＞10天	11	≤3000	2595	HCG	2	2	1	继发不孕	2.340	≤24	21.9	混合因素	5	1.82	1561	0.93	6	6.98	4.25	45.76	2	8	12.5	A	ICSI	5	0	2	0	0	0	0	否	否	全胚冷冻
1857	0	2018040017	夏香	≥35	47	1	刺激方案	1	225	≤10天	10	≤3000	2250	HCG	8	2	1	继发不孕	0.42	≤24	19.8	男方因素	2	34.02	393	0.67	0	7.89	7.85	92	4	2	4.3	B		0	0	0	0	0	0	0	是		未取到卵
2177	0	C00015920	刘养栓	≥35	49	2	拮抗剂方案	2	225	≤10天	7	≤3000	1575	HCG	1	2	2	继发不孕	0.14	≤24	23.4	女方因素	1	7.03	312	0.65	1	7.44	2.68	33	4	5	8.9	A	IVF	0	0	0	0	0	0	0	是		无可移植胚胎
1519	0	C00011695	段瑜	＜35	30	1	拮抗剂方案	2	262.5	≤10天	8	≤3000	2100	HCG	3	0	0	原发不孕	1.86	＞24	25	女方因素	3	7.77	844.63	0.94	3	6.95	3.65	39	1	9	0.9	A	IVF	0	0	0	0	0	0	0	否	否	全胚冷冻
855	0	C00018785	赵金凤	≥35	39	1	拮抗剂方案	2	225	≤10天	8	≤3000	1800	HCG	4	2	1	继发不孕	2.47	≤24	21.7	女方因素	5	2	1286.31	0.43	7	12.39	5.51	27.21	2	9	11.9	A-B	IVF	6	1	1	0	1	0	1	否	是	移植	未妊娠
1452	0	2017040019	陈作梅	≥35	44	2	刺激方案	1	225	≤10天	8	≤3000	1800	HCG	1	3	1	继发不孕	0.47	＞24	27.5	女方因素	3	8.49	903	0.41	3	7.26	7.68	45.76	4	5	7.7	A-B	IVF	1	0	1	0	0	0	0	否	否	全胚冷冻
1687	0	2017030293	杨红霞	≥35	38	1	刺激方案	1	225	≤10天	7	≤3000	1575	HCG	2	1	1	继发不孕	0.42	＞24	26.6	女方因素	2	18.32	778	1.39	1	12.12	3.28	95	4	4	7.9	A-B	IVF	0	0	0	0	0	0	0	是		未受精
93	0	C00009771	汤晶	＜35	32	1	降调节方案	3	211.364	＞10天	11	≤3000	2325	HCG	7	2	0	原发不孕	1.89	≤24	19.7	女方因素	9	2.56	1972	2.77	6	10.65	3.28	22	1	18	11.8	A	IVF	4	0	3	2	0	0	0	否	否	全胚冷冻
226	0	C00019096	张景博	≥35	36	2	拮抗剂方案	2	272.5	≤10天	10	≤3000	2725	HCG	3	0	0	原发不孕	1.69	≤24	19.2	女方因素	8	0.73	#NULL!	0.58	7	12.25	5.83	34.07	2	11	12.5	A	IVF	5	0	4	3	0	0	0	否	否	全胚冷冻
948	0	C00019154	张秀华	≥35	46	1	拮抗剂方案	2	281.25	≤10天	8	≤3000	2250	HCG	17	3	0	继发不孕	0.58	＞24	27.2	混合因素	4	1.38	728.36	0.54	4	7.3	3.44	23	4	8	10.6	A	ICSI	2	0	2	1	2	2	0	否	是	移植	未妊娠
2238	0	2017120272	王同艳	≥35	44	1	刺激方案	1	135	≤10天	5	≤3000	675	HCG	1	2	1	继发不孕	0.19	≤24	22.3	男方因素	1	17.38	121	0.43	1	16.24	6.68	65	4	5	9.5	A	IVF	0	0	0	0	0	0	0	是		无可移植胚胎
2006	0	2017050109	张玉玉	≥35	45	3	刺激方案	1	150	≤10天	6	≤3000	900	HCG	8	1	1	继发不孕	0.98	≤24	21.7	女方因素	1	14.46	940	0.47	2	14.6	3.06	66.06	4	6	5.2	A	IVF	1	0	1	1	0	0	0	否	否	全胚冷冻
2016	0	C00008153	臧传兰	≥35	46	1	刺激方案	1	225	＞10天	12	≤3000	2700	HCG	3	3	1	继发不孕	0.43	＞24	25	女方因素	1	23.03	824	0.84	1	19.48	4.26	10	4	3	0.65	B	IVF	1	0	1	0	0	0	0	否	否	全胚冷冻
1844	0	C00005239	李延美	≥35	36	1	刺激方案	1	150	≤10天	8	≤3000	1200	HCG	4	3	1	继发不孕	1.58	＞24	24.6	女方因素	2	1.61	451	0.35	0	6.68	2.6	56	2	14	11.6	B		0	0	0	0	0	0	0	是		未取到卵
708	0	2016090130	李祥敏	≥35	37	2	刺激方案	1	283.333	≤10天	9	≤3000	2550	HCG	1	1	1	继发不孕	1.25	≤24	20.2	女方因素	5	12.44	1646.47	2.1	3	5.04	2.14	59.09	2	9	5	B	IVF	2	0	1	0	0	0	0	否	否	全胚冷冻
1698	0	C00014131	张艳艳	≥35	48	2	刺激方案	1	150	≤10天	5	≤3000	750	HCG	2	1	1	继发不孕	0.91	≤24	21.1	女方因素	2	14.57	756	0.42	1	12.96	2.79	80.6	4	3	6.1		IVF	0	0	0	0	0	0	0	是		无可移植胚胎
1911	0	2016110009	曹红华	≥35	38	2	刺激方案	1	225	≤10天	6	≤3000	1350	HCG	2	3	1	继发不孕	0.06	≤24	21.8	女方因素	2	1.86	502	1.11	4	7.42	2.55	45.76	4	4	11.5	A-B	IVF	2	0	1	0	0	0	0	否	否	全胚冷冻
1906	0	2016060234	郝增凤	≥35	46	4	刺激方案	1	150	≤10天	7	≤3000	1050	HCG	8	1	1	继发不孕	1.55	≤24	23.4	混合因素	2	9.79	510	0.74	2	8.79	3.37	39.09	2	11	#NULL!	A	ICSI	1	0	1	0	0	0	0	否	否	全胚冷冻
1239	0	2016120004	孙海霞	＜35	30	2	刺激方案	1	225	≤10天	9	≤3000	2025	HCG	5	0	0	原发不孕	1.56	≤24	22	男方因素	3	1.48	941	0.82	2	9.18	3.63	35.42	1	6	11.3	B	ICSI	0	0	0	0	0	0	0	是		无可移植胚胎
17	0	2017010071	张光梓	＜35	32	1	降调节方案	3	150	≤10天	9	≤3000	1350	HCG	3	1	0	继发不孕	1.79	≤24	20.9	女方因素	9	0.85	1168	0.63	7	9.33	6.66	35.42	1	14	11	A	IVF	5	0	5	2	2	2	0	否	是	移植	已妊娠	临床妊娠	宫内妊娠	单胎宫内妊娠
197	0	C00018701	李彦红	＜35	34	1	拮抗剂方案	2	200	≤10天	8	≤3000	1600	HCG	6	1	0	继发不孕	2.88	≤24	21.6	女方因素	5	3.23	931.47	0.55	7	6.39	9.16	39.5	1	15	8.8	A-B	IVF	6	0	5	4	2	2	0	否	是	移植	已妊娠	临床妊娠	宫内妊娠	双胎宫内妊娠
795	0	2016120040	刘立梅	≥35	35	2	拮抗剂方案	2	197.222	≤10天	9	≤3000	1775	HCG	5	0	0	原发不孕	2.20	≤24	23.4	女方因素	5	3.28	1661	1.14	7	8.53	3.26	51.75	2	18	11	A-B	IVF	4	0	1	0	1	1	0	否	是	移植	未妊娠
1156	0	2016100214	刘文静	＜35	31	2	拮抗剂方案	2	283.333	≤10天	9	≤3000	2550	HCG	3	0	0	原发不孕	1.13	≤24	20	男方因素	4	1.15	1239	0.76	4	6.3	4.09	45.2	3	6	8.3	B	ICSI	6	0	4	0	2	2	0	否	是	移植	未妊娠
1661	0	C00018198	徐淑玲	≥35	44	1	刺激方案	1	150	≤10天	8	≤3000	1200	HCG	1	3	3	继发不孕	1.090	＞24	24.2	男方因素	2	13.51	840.48	1.34	3	12.12	4.57	85	4	5	6.6	B	ICSI	2	0	2	1	0	0	0	否	否	全胚冷冻
2270	0	2017120086	张莹莹	＜35	27	1	拮抗剂方案	2	150	≤10天	7	≤3000	1050	HCG	2	0	0	原发不孕	0.91	≤24	20.8	女方因素	1	8.56	315	0.56	0	14.38	6.12	40	3	4	#NULL!			0	0	0	0	0	0	0	是		未取到卵
1818	0	2016060118	张秀红	≥35	37	3	拮抗剂方案	2	225	≤10天	8	≤3000	1800	HCG	5	3	1	继发不孕	1.05	＞24	24.8	不明原因	2	0.82	511	3.98	2	12.37	3.11	91.75	4	6	9.7	B	IVF	1	0	2	0	0	0	0	否	否	全胚冷冻
1213	0	2017110106	王慧慧	＜35	28	1	降调节方案	3	215.625	≤10天	8	≤3000	1725	HCG	5	0	0	原发不孕	1.42	≤24	21.1	女方因素	4	2.67	1159	0.95	3	6.42	4.97	26.43	1	8	9.7	A	IVF	2	0	2	2	2	2	0	否	是	移植	已妊娠	临床妊娠	宫内妊娠	双胎宫内妊娠
315	0	2017070189	孔秀荣	≥35	42	1	降调节方案	3	219.231	＞10天	13	≤3000	2850	HCG	2	3	1	继发不孕	1.53	＞24	25.4	女方因素	7	1.44	2227	0.55	6	8.86	2.81	44	2	8	13.1	B	IVF	4	0	2	1	2	2	0	否	是	移植	已妊娠	临床妊娠	宫内妊娠	单胎宫内妊娠
481	0	2018010071	孙俪	≥35	46	2	降调节方案	3	187.5	＞10天	12	≤3000	2250	HCG	3	1	1	继发不孕	0.57	≤24	23.4	混合因素	6	3.59	1722	1.36	7	9.9	5.86	44	4	8	8.7	A	ICSI	6	0	2	1	0	0	0	否	否	全胚冷冻
2245	0	2016030157	修春苗	≥35	43	1	降调节方案	3	242.308	＞10天	13	＞3000	3150	HCG	1	2	1	继发不孕	0.11	≤24	20.7	男方因素	1	5.56	402	0.82	2	15.2	5.9	36.7	4	3	8.5	A	ICSI	2	0	2	0	2	2	0	否	是	移植	未妊娠
414	0	C00007667	郑成霞	≥35	40	1	降调节方案	3	216.667	≤10天	9	≤3000	1950	HCG	5	2	1	继发不孕	2.54	＞24	25.4	男方因素	7	0.66	1181	0.75	7	7.1	2.67	47	2	16	0.95	A	ICSI	4	0	2	0	2	2	0	否	是	移植	已妊娠	临床妊娠	宫内妊娠	双胎宫内妊娠
2071	0	2016030213	尹芳	＜35	31	2	刺激方案	1	216.667	≤10天	9	≤3000	1950	HCG	1	1	0	继发不孕	0.64	≤24	20.5	女方因素	1	15.37	560	0.94	0	11.33	3.46	43	3	4	4	A-B		0	0	0	0	0	0	0	是		未取到卵
1595	0	C00015608	田美香	≥35	37	2	拮抗剂方案	2	281.25	≤10天	8	≤3000	2250	HCG	3	2	2	继发不孕	1.0	≤24	23.9	女方因素	3	6.7	1003	1.15	4	9	7.13	36	4	7	12.5		IVF	3	0	2	1	2	2	0	否	是	移植	已妊娠	临床妊娠	宫内妊娠	单胎宫内妊娠
1630	0	C00011981	齐妍飞	≥35	36	1	拮抗剂方案	2	217.5	≤10天	10	≤3000	2175	HCG	6	1	1	继发不孕	0.31	＞24	27	女方因素	2	11.14	912	0.44	2	13.59	7.88	46	4	6	0.99	A	IVF	1	0	2	1	2	2	0	否	是	移植	未妊娠
910	0	2017090182	韩学艳	＜35	33	1	降调节方案	3	210	≤10天	10	≤3000	2100	HCG	2	0	0	原发不孕	1.48	≤24	23.8	女方因素	4	3.6	968	0.96	4	8.87	3.41	65.69	1	9	13.5	A	IVF	2	0	0	0	0	0	0	是		无可移植胚胎
181	0	2018010189	沈云燕	≥35	36	2	降调节方案	3	268.75	＞10天	12	＞3000	3225	HCG	2	3	1	继发不孕	2.93	＞24	25.4	不明原因	8	3.68	2301	1.36	8	7.81	5.37	29.6	2	13	10	A	ICSI	3	0	1	0	0	0	0	否	否	全胚冷冻
929	0	2017120182	赵美英	≥35	46	1	降调节方案	3	253.333	＞10天	15	＞3000	3800	HCG	3	3	2	继发不孕	0.49	＞24	26.6	女方因素	4	1.2	870	0.15	2	5.39	4.82	69	4	7	12.2	A-B	IVF	1	0	1	0	1	1	0	否	是	移植	未妊娠
233	0	2016060160	孟丽丽	＜35	31	2	降调节方案	3	268.182	＞10天	11	≤3000	2950	HCG	6	0	0	原发不孕	2.3	＞24	24.8	混合因素	5	0.84	1583	0.71	7	8.16	4.54	91.75	1	12	12.6	A-B	ICSI	7	0	5	2	0	0	0	否	否	全胚冷冻
391	0	2017070079	鲁云霞	＜35	34	1	降调节方案	3	218.75	＞10天	12	≤3000	2625	HCG	6	0	0	原发不孕	1.33	＞24	26	混合因素	7	0.48	1419	0.42	7	9.36	5.79	59.09	1	15	17.7	A	ICSI	7	0	2	0	0	0	0	否	否	全胚冷冻
884	0	2017100184	宋焕焕	＜35	31	4	降调节方案	3	197.727	＞10天	11	≤3000	2175	HCG	1	3	0	继发不孕	1.09	≤24	20.7	女方因素	5	1.05	1108	0.64	4	9.76	5.22	80.74	3	5	16.2	A	IVF	4	0	4	3	0	0	0	否	否	全胚冷冻
1268	0	C00016913	胡延南	＜35	32	1	拮抗剂方案	2	225	≤10天	6	≤3000	1350	HCG	2	2	0	继发不孕	2.93	≤24	23.3	男方因素	3	2.92	876	0.51	4	9.71	2.82	79	1	7	8.7	A-B	ICSI	2	0	0	0	0	0	0	是		无可移植胚胎
1892	0	2016050193	白秀兰	≥35	39	2	刺激方案	1	150	≤10天	7	≤3000	1050	HCG	8	2	1	继发不孕	0.56	≤24	18.7	混合因素	2	18.41	199	2.02	#NULL!	9.01	5.19	45	4	4	10.4	B		0	0	0	0	0	0	0	是		未取卵
1499	0	2016040177	耿洁	≥35	41	2	刺激方案	1	218.182	＞10天	11	≤3000	2400	HCG	8	1	0	继发不孕	0.98	＞24	28.1	女方因素	3	3.11	958	0.65	2	9.32	2.9	25	4	9	7.7	A-B	IVF	2	0	0	0	0	0	0	是		无可移植胚胎
375	0	C00017756	刘春娥	≥35	42	1	刺激方案	1	288.462	＞10天	13	＞3000	3750	HCG	1	2	1	继发不孕	2.66	＞24	27.3	混合因素	7	6.75	1618	0.31	7	9.49	3.8	35	2	10	6.3	A-B	ICSI	2	0	2	0	0	0	0	否	否	全胚冷冻
920	0	C00013019	王立	≥35	39	1	刺激方案	1	225	≤10天	8	≤3000	1800	HCG	3	4	1	继发不孕	1.42	≤24	22.3	女方因素	4	3.32	934	0.48	1	9.62	3.63	43	2	11	0.97	A-B	IVF	0	0	0	0	0	0	0	是		无可移植胚胎
474	0	C00011819	冯明明	≥35	35	1	降调节方案	3	229.545	＞10天	11	≤3000	2525	HCG	1	1	1	继发不孕	1.99	≤24	22.2	混合因素	6	1.77	1791	1.02	7	5.07	2.03	24.27	2	12	15	A	ICSI	3	0	2	2	2	2	0	否	是	移植	已妊娠	临床妊娠	宫内妊娠	双胎宫内妊娠
1076	0	2017070004	段芳芳	＜35	34	3	刺激方案	1	150	≤10天	9	≤3000	1350	HCG	3	3	1	继发不孕	0.47	≤24	24	女方因素	4	6.66	1561	0.86	#NULL!	11.33	3.46	43	3	4	7.2	A		0	0	0	0	0	0	0	是		未取卵
866	0	C00005637	黄传兰	＜35	33	3	刺激方案	1	262.5	≤10天	10	≤3000	2625	HCG	4	0	0	原发不孕	2.16	＞24	28.4	男方因素	5	5.51	1206	1.04	4	7.48	2.55	46.81	1	11	12.6	A	ICSI	3	0	2	0	2	2	0	否	是	移植	已妊娠	临床妊娠	宫内妊娠	单胎宫内妊娠
769	0	2016110215	王萌	＜35	28	1	刺激方案	1	225	≤10天	9	≤3000	2025	HCG	3	0	0	继发不孕	2.29	≤24	17.7	女方因素	5	2.13	1806	3.87	6	12.34	3.69	52	1	8	11.2	A	IVF	5	0	0	0	0	0	0	是		无可移植胚胎
737	0	2016060225	卜淑娟	≥35	36	5	刺激方案	1	281.25	≤10天	8	≤3000	2250	HCG	5	3	0	继发不孕	1.3	≤24	16.4	女方因素	5	2.01	1461	1.73	4	7.38	2.08	81.1	2	8	11.9	A	IVF	4	0	2	0	2	2	0	否	是	移植	未妊娠
2193	0	2017010074	魏玉凤	≥35	40	1	降调节方案	3	150	≤10天	9	≤3000	1350	HCG	1	4	1	继发不孕	0.40	＞24	30.8	女方因素	1	5.13	275	0.07	2	5.63	3.32	99.86	4	3	10.2	A	IVF	1	0	1	1	0	0	0	否	否	全胚冷冻
98	0	2017080071	代倩倩	＜35	28	1	降调节方案	3	225	＞10天	14	＞3000	3150	HCG	2	0	0	原发不孕	3.29	≤24	22.9	混合因素	9	4.49	1936	1.73	9	9.49	5.07	36.43	1	16	11.5	A	ICSI	5	0	2	0	0	0	0	否	否	全胚冷冻
1374	0	2016050053	薛维芳	≥35	42	4	拮抗剂方案	2	225	≤10天	5	≤3000	1125	HCG	2	2	1	继发不孕	1.69	＞24	24.9	混合因素	3	0.87	448	0.27	2	8.63	4.84	36.43	2	8	11	A	ICSI	1	0	2	0	2	2	0	否	是	移植	已妊娠	临床妊娠	宫内妊娠	单胚胎停
905	0	C00010999	刘衍兰	≥35	37	2	拮抗剂方案	2	202.5	≤10天	10	≤3000	2025	双扳机	3	0	0	原发不孕	0.89	≤24	22.4	女方因素	5	0.75	1209	1.23	5	16.72	5.04	11	4	6	11.2	A	IVF	1	0	0	0	0	0	0	是		无可移植胚胎
1196	0	2016110014	王帆	＜35	31	1	刺激方案	1	225	≤10天	7	≤3000	1575	HCG	6	1	1	继发不孕	2.94	＞24	25.7	女方因素	4	10.13	1062	0.73	4	9.45	2.98	77	1	9	17.6	B	IVF	4	0	2	0	0	0	0	否	否	全胚冷冻
1052	0	C00012819	王小凤	≥35	38	1	拮抗剂方案	2	281.25	≤10天	8	≤3000	2250	双扳机	3	3	1	继发不孕	2.21	≤24	22.1	女方因素	4	9.53	1734	0.67	4	11.06	5.28	68	2	7	8.5	B	IVF	1	0	1	0	0	0	0	否	否	全胚冷冻
531	0	2016060151	耿洁	≥35	41	3	刺激方案	1	285	≤10天	10	≤3000	2850	HCG	8	1	0	继发不孕	1.7	＞24	28.1	女方因素	6	5.25	2117	1.1	4	9.32	2.9	25	2	9	5.3	B	IVF	4	0	2	0	0	0	0	否	否	全胚冷冻
26	0	2016070024	杨学娟	＜35	30	1	降调节方案	3	204.545	＞10天	11	≤3000	2250	HCG	6	0	0	原发不孕	2.13	≤24	20.9	混合因素	10	3.37	1641	0.87	9	5.72	5.03	99.86	1	11	#NULL!		ICSI	6	0	4	1	2	2	0	否	是	移植	未妊娠
1667	0	C00004982	罗俊玲	≥35	43	1	刺激方案	1	225	≤10天	10	≤3000	2250	HCG	3	1	1	继发不孕	0.30	≤24	22.9	女方因素	2	15.75	832	0.9	1	14.47	6.39	80	4	3	5.4	A	IVF	0	0	0	0	0	0	0	是		无可移植胚胎
95	0	2016010146	郝雅彬	＜35	33	1	降调节方案	3	200	≤10天	7	≤3000	1400	HCG	2	2	0	继发不孕	2.29	≤24	21.4	女方因素	9	13.02	1944	1.3	4	5.54	5.1	49.09	1	14	9	A	IVF	3	0	2	0	2	2	0	否	是	移植	未妊娠
1124	0	2016030225	柳风连	＜35	29	1	降调节方案	3	267.857	＞10天	14	＞3000	3750	HCG	3	3	0	继发不孕	1.86	≤24	22	女方因素	4	1.68	1362	1.15	5	7.43	5.69	11	1	8	13.5	B	IVF	3	0	2	0	2	2	0	否	是	移植	已妊娠	临床妊娠	宫内妊娠	单胎宫内妊娠
578	0	2017080004	卜淑娟	≥35	37	7	拮抗剂方案	2	279.545	＞10天	11	＞3000	3075	HCG	7	3	0	继发不孕	2.28	≤24	16.4	女方因素	6	1.3	1648	2.19	3	7.38	2.08	33.77	2	8	11.5	A	IVF	3	0	0	0	0	0	0	是		无可移植胚胎
571	0	2018020046	张焕英	≥35	36	1	降调节方案	3	287.5	＞10天	15	＞3000	4312.5	HCG	15	0	0	原发不孕	2.63	＞24	27.3	女方因素	6	0.77	1746	0.77	6	6.88	3.26	71	2	8	15.2	B	IVF	3	0	1	0	0	0	0	否	否	全胚冷冻
1216	0	2016090145	李启霞	≥35	37	2	刺激方案	1	150	≤10天	7	≤3000	1050	HCG	5	3	1	继发不孕	1.43	≤24	22.6	女方因素	4	5.29	1147.22	1.21	4	8.51	4.8	99.09	2	7	6.7	B	IVF	4	0	4	0	0	0	0	否	否	全胚冷冻
483	0	2016020011	刘双	≥35	37	1	降调节方案	3	207.692	＞10天	13	≤3000	2700	HCG	1	1	1	原发不孕	1.44	≤24	21.2	女方因素	6	1.22	1684	1.31	4	6.69	4.2	31	2	10	10.7	A	IVF	4	0	2	0	2	2	0	否	是	移植	未妊娠
116	0	2017030089	翟爽	＜35	32	2	降调节方案	3	150	＞10天	11	≤3000	1650	HCG	3	0	0	原发不孕	1.7	≤24	23.8	混合因素	9	1.37	1550	0.8	6	5.66	6.04	29.86	1	18	14	A	ICSI	3	0	1	0	1	1	0	否	是	移植	已妊娠	临床妊娠	宫内妊娠	单胚胎停
297	0	2018060204	庄会妹	＜35	30	3	刺激方案	1	225	≤10天	7	≤3000	1575	HCG	3	0	0	原发不孕	2.24	＞24	24.4	男方因素	7	6.92	2693	1.31	5	7.15	2.74	99.86	1	16	7.2	A	ICSI	4	0	0	0	0	0	0	是		无可移植胚胎
103	0	C00015058	彭春燕	＜35	32	1	拮抗剂方案	2	218.75	＞10天	12	≤3000	2625	双扳机	1	1	1	继发不孕	3.1	＞24	30.9	女方因素	9	1.04	1879	0.69	8	4.77	4	56	1	38	9.5	B	IVF	7	0	2	0	2	2	0	否	是	移植	未妊娠
1957	0	2016040278	孙海霞	＜35	30	1	降调节方案	3	225	≤10天	6	≤3000	1350	HCG	5	0	0	原发不孕	1.89	≤24	22	女方因素	2	1.69	490	1.27	3	9.18	3.63	35.42	1	6	10.5	A-B	IVF	0	0	0	0	0	0	0	是		未受精
299	0	C00004757	臧芹	≥35	41	2	降调节方案	3	245.192	＞10天	13	＞3000	3187.5	HCG	3	4	0	继发不孕	1.75	≤24	23.5	女方因素	7	0.82	2663	0.48	4	5.75	2.6	74	2	14	9.8	A	IVF	2	0	0	0	0	0	0	否	否	全胚冷冻
1389	0	2018010106	田相云	≥35	44	1	刺激方案	1	225	≤10天	10	≤3000	2250	HCG	3	1	1	继发不孕	0.64	≤24	24	女方因素	3	7.3	905	2.18	4	7.35	2.65	43	4	5	10.8	B	IVF	2	0	2	0	0	0	0	否	否	全胚冷冻
1779	0	C00006020	赵芬燕	＜35	34	1	降调节方案	3	279.545	＞10天	11	＞3000	3075	HCG	4	2	0	继发不孕	1.3	≤24	20.6	女方因素	2	2.03	583	0.16	2	7.94	2.58	26	1	9	9.3	A	IVF	2	0	2	0	2	2	0	否	是	移植	已妊娠	临床妊娠	宫内妊娠	单胎宫内妊娠
524	0	2017100141	郁登敏	＜35	34	1	拮抗剂方案	2	250	≤10天	9	≤3000	2250	HCG	1	0	0	原发不孕	2.26	≤24	22.5	不明原因	6	5.95	2198	1.06	8	10.78	3.28	86.43	1	12	10	A-B	IVF	6	0	4	1	0	0	0	否	否	全胚冷冻
522	0	C00010744	许凤梅	＜35	31	1	降调节方案	3	279.545	＞10天	11	＞3000	3075	HCG	2	0	0	原发不孕	2.01	＞24	27.3	女方因素	6	0.76	2216	0.62	7	7.86	5.01	24	1	32	0.87	B	IVF	2	0	2	0	2	2	0	否	是	移植	未妊娠
721	0	C00007827	董云娟	≥35	46	3	刺激方案	1	225	≤10天	9	≤3000	2025	HCG	1	2	0	继发不孕	1.05	≤24	22.6	女方因素	5	11.98	1561	1.18	6	7.9	4.7	89	4	11	0.76	A	IVF	4	0	3	2	0	0	0	否	否	全胚冷冻
1464	0	C00009634	孔娟	≥35	38	2	拮抗剂方案	2	150	≤10天	9	≤3000	1350	HCG	1	2	0	继发不孕	1.73	≤24	22	女方因素	3	3.37	958	1.47	3	8.49	5.81	36.43	2	8	9.8	A	IVF	0	1	1	0	0	0	0	否	否	全胚冷冻
551	0	2018010023	徐莹莹	＜35	31	1	降调节方案	3	187.5	≤10天	10	≤3000	1875	HCG	3	0	0	继发不孕	1.53	≤24	23.7	女方因素	6	1.34	1897	0.39	4	6.41	3.12	38.08	1	9	9.3	B	IVF	3	0	2	1	2	2	0	否	是	移植	已妊娠	临床妊娠	宫内妊娠	单胚胎停
1546	0	C00009604	于静	≥35	38	5	拮抗剂方案	2	150	＞10天	11	≤3000	1650	HCG	5	0	0	原发不孕	1.12	≤24	23.6	男方因素	3	6.61	1169	0.71	3	16.37	9.92	54.67	4	6	1.2	A	ICSI	2	0	0	0	0	0	0	是		无可移植胚胎
1424	0	C00012735	王秋红	≥35	41	2	拮抗剂方案	2	285	≤10天	10	≤3000	2850	HCG	1	2	0	继发不孕	0.18	≤24	21.4	女方因素	3	1.36	971	1.18	3	17.13	5.46	15	4	5	10.1	A	IVF	3	0	0	0	0	0	0	是		无可移植胚胎
7	0	2017110216	陈晓花	≥35	42	2	降调节方案	3	180.769	＞10天	13	≤3000	2350	HCG	2	1	1	继发不孕	1.81	＞24	26.2	女方因素	10	1.3	2099	0.84	9	9.76	4.96	69.5	2	13	15.1	A	IVF	4	0	2	0	2	2	0	否	是	移植	未妊娠
1850	0	2016090191	张丽华	≥35	39	1	刺激方案	1	150	≤10天	8	≤3000	1200	HCG	2	2	1	继发不孕	0.94	＞24	28.3	混合因素	2	24.6	432	1.08	#NULL!	8.57	3.01	59	4	4	6	B		0	0	0	0	0	0	0	是		未取卵
33	0	2017090079	吴海燕	≥35	39	2	降调节方案	3	287.5	＞10天	12	＞3000	3450	HCG	2	4	1	继发不孕	2.36	＞24	25.3	女方因素	9	1.07	1481	0.46	9	7.34	2.5	43.5	2	18	9.2	A	IVF	0	0	1	0	0	0	0	否	否	全胚冷冻
1001	0	C00016290	孙玉新	＜35	33	1	降调节方案	3	252.273	＞10天	11	≤3000	2775	HCG	5	0	0	原发不孕	2.03	≤24	19.3	女方因素	4	2.04	1274	1.19	6	8.86	4.68	42	1	7	10.2	A	IVF	3	0	1	1	1	1	0	否	是	移植	未妊娠
2279	0	2017100086	张春艳	＜35	32	6	刺激方案	1	234.783	＞10天	23	＞3000	5400	HCG	6	0	0	原发不孕	0.20	＞24	26.7	女方因素	1	7.05	298	0.42	0	6.9	3.67	42.91	3	3	#NULL!			0	0	0	0	0	0	0	是		未取到卵
1551	0	2017060209	韩立香	≥35	45	1	刺激方案	1	177.083	＞10天	12	≤3000	2125	HCG	2	2	1	继发不孕	0.7	≤24	22	女方因素	3	7	1151	1.66	2	12.08	5.78	32	4	5	5.2	B	IVF	2	0	2	0	0	0	0	否	否	全胚冷冻
690	0	2017110119	吴玉贞	≥35	36	2	降调节方案	3	187.5	＞10天	12	≤3000	2250	HCG	2	2	1	继发不孕	4.24	≤24	23.4	男方因素	5	7.38	1767	1.47	8	9.91	6.42	41	2	16	10.2	A	ICSI	5	0	2	1	2	2	0	否	是	移植	未妊娠
1100	0	2018050051	张莹莹	＜35	28	2	刺激方案	1	231.25	＞10天	12	≤3000	2775	HCG	2	0	0	原发不孕	2.1	≤24	20.8	女方因素	4	0.99	1446	0.42	0	14.38	6.12	40	1	9	12.6	A		0	0	0	0	0	0	0	是		未取到卵
790	0	C00019620	魏赢	≥35	35	1	拮抗剂方案	2	258.333	≤10天	9	≤3000	2325	HCG	1	1	0	继发不孕	1.41	＞24	30.1	女方因素	5	5.05	1683.21	1.23	7	6.8	4.21	19.27	2	20	10.2	A-B	IVF	3	0	2	1	2	2	0	否	是	移植	未妊娠
251	0	C00003548	马媛	＜35	31	3	降调节方案	3	165	≤10天	10	≤3000	1650	HCG	5	1	0	原发不孕	2.67	≤24	22.5	女方因素	7	0.34	1742	0.5	8	7.35	2.67	40	1	12	9.6	A	IVF	2	0	1	0	1	1	0	否	是	移植	已妊娠	临床妊娠	宫内妊娠	单胚胎停
521	0	C00018401	王灿灿	＜35	32	1	刺激方案	1	200	≤10天	7	≤3000	1400	HCG	3	0	0	原发不孕	1.81	≤24	19.4	男方因素	6	8.91	2234.34	1.11	7	5.76	5.17	71.94	1	14	9.8	A-B	ICSI	3	1	3	0	0	0	0	否	否	全胚冷冻
1510	0	C00011013	李焕苓	≥35	36	2	刺激方案	1	150	≤10天	6	≤3000	900	HCG	5	1	1	继发不孕	1.89	≤24	22.6	女方因素	3	17.54	886	0.51	3	8.41	5.26	42	2	5	1.08	A	IVF	1	0	2	0	0	0	0	否	否	全胚冷冻
1604	0	2017050046	满英姿	≥35	43	3	刺激方案	1	225	≤10天	8	≤3000	1800	HCG	2	3	1	继发不孕	1.17	≤24	21.6	男方因素	2	10.07	996	0.9	2	13.3	4.24	41.3	4	6	10	B	ICSI	2	0	1	0	0	0	0	否	否	全胚冷冻
1098	0	2018030198	郭英霞	≥35	42	5	拮抗剂方案	2	238.636	＞10天	11	≤3000	2625	双扳机	1	2	1	继发不孕	1.24	＞24	30.8	女方因素	4	3.13	1454	1.06	4	11.75	3.86	16	2	7	7.2	B	IVF	4	0	2	0	2	2	0	否	是	移植	未妊娠
1307	0	C00004964	贾希菊	≥35	45	2	拮抗剂方案	2	250	＞10天	12	≤3000	3000	双扳机	1	3	2	继发不孕	0.99	＞24	30.1	女方因素	3	4.82	746	1.03	3	5.99	4.85	68	4	6	10	A-B	IVF	1	0	2	0	2	2	0	否	是	移植	未妊娠
172	0	C00015663	李春彦	≥35	40	2	拮抗剂方案	2	225	≤10天	10	≤3000	2250	HCG	2	4	0	继发不孕	1.67	＞24	24.6	女方因素	8	4.29	2410	1.88	4	6.63	2.65	72	2	12	0.55		IVF	2	0	0	0	0	0	0	是		无可移植胚胎
1074	0	C00013221	曹玉平	≥35	43	1	拮抗剂方案	2	290.357	≤10天	7	≤3000	2032.5	HCG	5	3	1	继发不孕	1.24	≤24	20.6	男方因素	4	5.75	1567	1.09	5	6.42	4.21	41.49	2	10	12	A	IVF	4	0	2	0	2	2	0	否	是	移植	已妊娠	临床妊娠	宫内妊娠	单胎宫内妊娠
890	0	C00010664	李梅英	≥35	40	2	降调节方案	3	253.846	＞10天	13	＞3000	3300	HCG	9	3	0	继发不孕	1.83	＞24	27.6	混合因素	5	1.29	1086	0.33	4	7.05	3.05	22	2	9	9.8	A-B	ICSI	2	0	2	0	2	2	0	否	是	移植	未妊娠
870	0	C00012037	贾慧	≥35	36	1	降调节方案	3	246.429	＞10天	14	＞3000	3450	HCG	2	1	0	继发不孕	1.91	≤24	21.7	女方因素	5	1.71	1194	0.76	7	11.71	6.24	12.5	2	12	13.9	A	IVF	4	0	2	0	0	0	0	否	否	全胚冷冻
2240	0	2017080135	左云芳	≥35	46	6	刺激方案	1	150	≤10天	4	≤3000	600	HCG	1	3	1	继发不孕	0.55	≤24	22.1	女方因素	1	9.16	144	0.54	1	19.78	6.22	40.37	4	2	6.5	B	IVF	0	0	0	0	0	0	0	是		无可移植胚胎
1866	0	2017040034	姜琰珺	≥35	42	2	刺激方案	1	150	≤10天	6	≤3000	900	HCG	7	0	0	原发不孕	0.92	＞24	28.5	不明原因	2	5.06	363	0.15	2	12.74	2.96	30	4	4	8.2	B	IVF	1	0	1	1	0	0	0	否	否	全胚冷冻
64	0	C00018512	司薇薇	＜35	29	2	降调节方案	3	275	＞10天	11	＞3000	3025	HCG	4	0	0	原发不孕	1.41	＞24	27.3	女方因素	9	1.91	2632.32	1.43	9	4.82	4.16	46	1	13	8.9	A	IVF	8	0	4	2	0	0	0	否	否	全胚冷冻
836	0	C00011659	张萍	＜35	28	1	拮抗剂方案	2	150	≤10天	7	≤3000	1050	HCG	3	0	0	原发不孕	2.46	≤24	23.5	女方因素	5	2.7	1405	0.54	6	7.18	2.78	26.8	1	12	1.07	A	IVF	4	0	4	1	2	2	0	否	是	移植	已妊娠	临床妊娠	宫内妊娠	单胎宫内妊娠
1030	0	2016060187	张倩	＜35	24	1	刺激方案	1	225	≤10天	10	≤3000	2250	HCG	4	0	0	原发不孕	1.34	＞24	24.8	女方因素	4	0.51	1143	3.87	3	7.33	5.03	46	1	8	17	B	IVF	0	0	0	0	0	0	0	是		未受精
1450	0	2018030161	王建玲	≥35	36	1	刺激方案	1	150	≤10天	6	≤3000	900	HCG	1	3	1	继发不孕	0.83	≤24	23.3	女方因素	3	17.14	904	0.87	2	7.39	4.79	47.1	4	6	5	B	IVF	0	0	0	0	0	0	0	是		未受精
563	0	2018030250	杨燕	＜35	33	2	刺激方案	1	225	≤10天	8	≤3000	1800	HCG	3	1	0	继发不孕	1.6	≤24	17.7	男方因素	6	11.82	1814	1.6	7	8.79	3.68	72	1	10	4.4	A	IVF	7	0	2	1	0	0	0	否	否	全胚冷冻
494	0	C00008606	闫正芳	≥35	43	2	降调节方案	3	271.154	＞10天	13	＞3000	3525	HCG	3	3	1	继发不孕	1.87	≤24	24	女方因素	6	1.65	2531	1.32	6	11.11	4.45	10	2	12	1	A-B	IVF	3	0	2	0	0	0	0	否	否	全胚冷冻
1789	0	2016040238	王增苓	≥35	43	1	刺激方案	1	160.714	≤10天	7	≤3000	1125	HCG	12	2	1	继发不孕	0.56	＞24	29.3	女方因素	2	2.29	560	0.3	1	10.38	5.09	55.42	4	7	8.4	A	IVF	0	0	0	0	0	0	0	是		未受精
1261	0	2017080276	郭爱玲	≥35	37	1	降调节方案	3	150	≤10天	8	≤3000	1200	HCG	2	1	0	继发不孕	1.24	≤24	21	男方因素	3	3.86	887	0.29	3	7.45	4.71	44.93	2	6	10.1	A	ICSI	3	0	2	0	2	2	0	否	是	移植	未妊娠
390	0	C00016033	刘婷	＜35	30	1	降调节方案	3	245.455	＞10天	11	≤3000	2700	HCG	2	0	0	原发不孕	2.47	≤24	19.9	女方因素	7	1.26	1488	0.89	7	11.55	5	40	1	14	13.5	A	IVF	4	0	2	0	2	2	0	否	是	移植	已妊娠	临床妊娠	宫内妊娠	双胎宫内妊娠
170	0	2018060191	程花	≥35	35	2	降调节方案	3	130	＞10天	20	≤3000	2600	HCG	3	3	1	继发不孕	1.64	≤24	23.1	男方因素	8	2.65	2534	1.1	9	11.62	5.28	65.69	2	18	10.2	A	ICSI	6	0	4	0	2	2	0	否	是	移植	未妊娠
1064	0	2018010047	鲁桂芹	≥35	38	4	刺激方案	1	217.5	≤10天	10	≤3000	2175	HCG	1	2	0	继发不孕	1.44	＞24	29.3	不明原因	4	5.48	1638	0.62	5	8.25	2.25	76.43	2	10	9.4	B	IVF	4	0	2	1	0	0	0	否	否	全胚冷冻
1434	0	2016060099	万冷冷	＜35	32	1	降调节方案	3	251.923	＞10天	13	＞3000	3275	HCG	12	0	0	原发不孕	1.61	≤24	21.1	女方因素	3	3.11	942	1.03	6	7.38	3.08	56.76	1	9	14.5	A	IVF	5	0	0	0	0	0	0	是		无可移植胚胎
2135	0	2017040168	孙燕	≥35	43	2	刺激方案	1	150	≤10天	9	≤3000	1350	HCG	1	4	1	继发不孕	0.93	＞24	25.6	女方因素	1	15.27	396	0.67	1	13.75	4.17	65	4	3	6.5	A-B	IVF	0	0	0	0	0	0	0	是		无可移植胚胎
426	0	C00018943	李静	≥35	36	1	降调节方案	3	245	≤10天	10	≤3000	2450	HCG	4	5	2	继发不孕	2.33	≤24	21.9	男方因素	7	1.07	1838	1.26	9	7.55	2.61	28.96	2	20	14.9	B	ICSI	3	0	2	1	2	2	0	否	是	移植	已妊娠	临床妊娠	宫内妊娠	单胚胎停
781	0	C00004992	李敬菊	≥35	42	4	刺激方案	1	251.786	＞10天	14	＞3000	3525	HCG	1	2	1	继发不孕	0.59	＞24	25.6	女方因素	5	10.18	1752	1.24	4	14.53	5.74	74.34	4	6	5.9	B	IVF	2	0	2	0	0	0	0	否	否	全胚冷冻
216	0	2018060021	翟文方	＜35	32	1	降调节方案	3	285	≤10天	10	≤3000	2850	HCG	1	0	0	原发不孕	2.84	≤24	20.4	男方因素	8	0.5	1671	0.54	6	12.47	5.37	34.56	1	14	11.1	A	IVF	0	0	0	0	0	0	0	是		无可移植胚胎
196	0	C00007283	李倩雯	＜35	26	1	降调节方案	3	236.538	＞10天	13	＞3000	3075	HCG	3	0	0	原发不孕	2.22	＞24	26.3	女方因素	8	2.91	2016	0.42	9	12.76	3.43	25	1	15	1.32	A-B	IVF	5	1	2	0	1	1	0	否	是	移植	已妊娠	临床妊娠	宫内妊娠	单胎宫内妊娠
2030	0	2017110044	刘春	≥35	45	1	降调节方案	3	250	≤10天	10	≤3000	2500	HCG	3	3	1	继发不孕	0.23	≤24	23.6	不明原因	1	6.78	716	1.22	1	17.41	5.26	42	4	3	7		ICSI	1	0	1	0	0	0	0	否	否	全胚冷冻
385	0	C00013285	王丽	≥35	46	4	降调节方案	3	242.308	＞10天	13	＞3000	3150	HCG	1	1	1	继发不孕	1.25	≤24	24	女方因素	7	1.11	1566	0.33	5	10.71	6.58	37.78	2	13	10.5	B	IVF	4	0	0	0	0	0	0	是		无可移植胚胎
816	0	2016030183	张淑华	＜35	30	1	降调节方案	3	239.423	＞10天	13	＞3000	3112.5	HCG	2	0	0	原发不孕	1.29	≤24	20.3	不明原因	5	3.58	1528	0.92	6	8.24	3.64	72	1	9	11.5	A	IVF	5	0	3	2	2	2	0	否	是	移植	未妊娠
584	0	2017040013	李霄丽	＜35	26	1	降调节方案	3	253.125	≤10天	8	≤3000	2025	HCG	2	0	0	原发不孕	1.84	≤24	24	不明原因	6	9.42	1610	0.98	4	6.1	5.76	33.03	1	9	15.7	A	IVF	1	0	0	0	0	0	0	是		无可移植胚胎
199	0	C00012973	谭菁菁	≥35	37	1	降调节方案	3	283.333	＞10天	12	＞3000	3400	HCG	4	0	0	原发不孕	1.83	≤24	23.6	女方因素	8	1.18	1959	0.75	9	8.69	5.66	52.4	2	13	12.6	A-B	IVF	7	0	2	0	0	0	0	否	否	全胚冷冻
317	0	C00008493	刘传英	≥35	40	1	降调节方案	3	225	≤10天	10	≤3000	2250	HCG	5	2	1	继发不孕	1.86	≤24	19.5	女方因素	7	1.06	2188	0.97	8	7.32	5.1	27.83	2	16	0.81	A	IVF	4	0	2	0	2	2	0	否	是	移植	未妊娠
1133	0	2017070031	李秀梅	≥35	42	4	降调节方案	3	240	≤10天	10	≤3000	2400	HCG	1	4	1	继发不孕	0.58	＞24	26	混合因素	4	0.78	1338	0.55	5	15.05	2.42	17	4	8	8.3	B	ICSI	3	0	3	2	0	0	0	否	否	全胚冷冻
2261	0	2017090244	高红	≥35	43	1	刺激方案	1	225	≤10天	7	≤3000	1575	HCG	10	1	1	继发不孕	0.22	＞24	28.2	女方因素	1	7.94	329	0.05	0	8.94	5.63	56.43	4	4	#NULL!			0	0	0	0	0	0	0	是		未取到卵
1810	0	2016080075	尹芳	＜35	32	7	刺激方案	1	214.286	≤10天	7	≤3000	1500	HCG	2	1	0	继发不孕	0.95	≤24	20.5	女方因素	2	4.22	529	0.76	2	9.9	3.75	89	3	4	7.5	A-B	IVF	2	0	0	0	0	0	0	是		无可移植胚胎
83	0	2018030010	韩学艳	＜35	34	2	降调节方案	3	225	≤10天	9	≤3000	2025	HCG	2	0	0	原发不孕	2.60	≤24	23.8	男方因素	9	0.44	2161	0.9	7	8.87	3.41	35.42	1	9	10.6	B-C	ICSI	5	0	2	0	2	2	0	否	是	移植	未妊娠
1459	0	C00011251	薛爱华	≥35	48	2	刺激方案	1	225	≤10天	9	≤3000	2025	HCG	3	2	1	继发不孕	0.3	＞24	25	女方因素	3	1.68	968	1.14	3	10.12	4.54	17	4	8	0.8	A-B	IVF	0	0	2	0	0	0	0	否	否	全胚冷冻
52	0	C00010927	杨玲	＜35	22	1	降调节方案	3	195	≤10天	10	≤3000	1950	HCG	2	0	0	原发不孕	2.64	≤24	22	女方因素	9	0.62	2975	2.23	7	6.5	3.5	35	1	17	10.1	A	IVF	2	0	2	0	2	2	0	否	是	移植	已妊娠	临床妊娠	宫内妊娠	双胎宫内妊娠
2121	0	2017030169	郑加玉	≥35	38	4	拮抗剂方案	2	255	≤10天	5	≤3000	1275	HCG	5	0	0	原发不孕	1.52	＞24	26.6	男方因素	1	5.25	431	0.38	1	7.67	2.72	56.76	4	4	7.5	A	ICSI	1	0	1	0	0	0	0	否	否	全胚冷冻
1129	0	2016050139	张俊茹	≥35	39	1	刺激方案	1	182.143	＞10天	14	≤3000	2550	HCG	2	3	1	继发不孕	0.94	≤24	23.4	女方因素	4	7.08	1350	1.35	2	8.72	2.14	32.34	4	5	10.4	A	IVF	2	0	1	0	1	1	0	否	是	移植	未妊娠
34	0	2017030076	朱艳苓	≥35	38	2	降调节方案	3	225	＞10天	12	≤3000	2700	HCG	12	4	1	继发不孕	0.35	≤24	18	女方因素	9	2.59	1479	0.89	5	10.99	8.56	77.07	4	7	13	A	IVF	4	0	2	0	2	2	0	否	是	移植	未妊娠
60	0	C00016861	陈晨	＜35	34	2	降调节方案	3	212.5	＞10天	12	≤3000	2550	HCG	2	0	0	原发不孕	2.55	≤24	23	男方因素	9	2.94	2765	1.1	9	5.69	3.28	43.29	1	13	10.8	A-B	ICSI	5	0	2	1	0	0	0	否	否	全胚冷冻
628	0	2017080123	刘秀蓬	≥35	42	1	拮抗剂方案	2	206.25	≤10天	8	≤3000	1650	HCG	5	3	1	继发不孕	0.47	≤24	21.5	混合因素	6	2.72	1121	0.74	4	10.37	3.8	57	4	7	7	B	ICSI	3	0	0	0	0	0	0	是		无可移植胚胎
1336	0	2016090007	亓宗娥	≥35	44	2	刺激方案	1	278.571	≤10天	7	≤3000	1950	HCG	6	4	1	继发不孕	0.74	＞24	25.5	女方因素	3	5.6	639	0.81	2	9.04	6.38	67	4	7	14.4	B	IVF	1	0	0	0	0	0	0	是		无可移植胚胎
1115	0	2018070141	王晓峰	≥35	43	5	降调节方案	3	168.75	＞10天	16	≤3000	2700	HCG	3	3	2	继发不孕	0.67	≤24	22.6	女方因素	4	6.64	1392	0.45	4	10.5	4.39	99.09	4	4	8.9	B	IVF	1	0	3	0	0	0	0	否	否	全胚冷冻
1758	0	2016020134	郑加玉	≥35	37	2	刺激方案	1	225	≤10天	7	≤3000	1575	HCG	4	0	0	原发不孕	0.71	＞24	26.6	男方因素	2	4.86	614	0.7	3	9.78	2.72	53	4	4	7.3	B	ICSI	2	0	1	0	0	0	0	否	否	全胚冷冻
1565	0	C00012613	游双慧	≥35	39	3	刺激方案	1	218.182	＞10天	11	≤3000	2400	HCG	6	3	1	继发不孕	0.28	≤24	19.7	女方因素	3	22.3	1098	1.07	2	14.7	6.43	39.09	4	3	6.4	B-C	IVF	1	0	1	0	0	0	0	否	否	全胚冷冻
698	0	C00016334	李娟	≥35	35	1	拮抗剂方案	2	206.25	≤10天	8	≤3000	1650	HCG	5	0	0	原发不孕	1.83	≤24	21.5	混合因素	5	2.08	1702	0.68	7	10.21	3.45	28	2	14	9.1	A	ICSI	2	0	0	0	0	0	0	是		无可移植胚胎
1234	0	2017020062	刘玉玲	≥35	38	2	降调节方案	3	254.167	＞10天	12	＞3000	3050	HCG	2	2	1	继发不孕	1.40	＞24	24.7	混合因素	3	2.28	959	0.48	4	12.9	2.9	40.37	2	8	14	A	ICSI	4	0	2	0	2	2	0	否	是	移植	未妊娠
2273	0	C00009252	王宝玉	≥35	43	1	刺激方案	1	281.25	≤10天	8	≤3000	2250	双扳机	1	3	1	继发不孕	0.42	≤24	23	混合因素	1	7.03	312	0.65	1	15.51	7.36	26.7	4	2	#NULL!		ICSI	0	0	0	0	0	0	0	是		无可移植胚胎
2028	0	2018060084	杨咏梅	≥35	43	1	刺激方案	1	150	≤10天	6	≤3000	900	HCG	1	4	1	继发不孕	0.07	≤24	19.8	混合因素	1	13.81	719	0.47	1	18.97	6.45	84	4	3	5.5		ICSI	0	0	0	0	0	0	0	是		无可移植胚胎
1534	0	2016120052	刘安平	＜35	28	1	降调节方案	3	161.842	＞10天	19	＞3000	3075	HCG	5	1	0	继发不孕	3.80	≤24	20.3	不明原因	3	0.37	1217	0.79	4	9.55	7.88	45.42	1	31	13.6	A-B	IVF	2	0	2	0	0	0	0	否	否	全胚冷冻
1435	0	C00003729	梁爱华	≥35	41	1	刺激方案	1	225	≤10天	9	≤3000	2025	HCG	1	2	1	继发不孕	0.75	＞24	25.7	混合因素	3	14.72	941	1.03	2	12.4	3.57	55	4	5	0.72	B	ICSI	2	0	2	1	0	0	0	否	否	全胚冷冻
1583	0	2018040169	高云霞	＜35	34	1	降调节方案	3	270	≤10天	10	≤3000	2700	HCG	9	0	0	原发不孕	1.58	≤24	23.3	男方因素	3	1.64	1040	1.15	5	4.71	3.38	34.04	1	12	13.2	A	ICSI	0	0	0	0	0	0	0	是		无可移植胚胎
1188	0	C00003713	徐延雁	≥35	36	2	刺激方案	1	225	≤10天	7	≤3000	1575	HCG	6	0	0	原发不孕	1.6	＞24	31.2	女方因素	4	2.9	1109	0.39	4	4.77	2.72	39.09	2	7	14.9	A-B	IVF	4	0	0	0	0	0	0	是		无可移植胚胎
607	0	2017110182	刘文华	≥35	39	1	降调节方案	3	225	≤10天	9	≤3000	2025	HCG	12	0	0	原发不孕	3.89	＞24	24.2	女方因素	6	1.8	1458	1.47	7	4.87	4.03	46.43	2	17	11.6	A	IVF	4	0	2	0	2	2	0	否	是	移植	未妊娠
392	0	2016120213	刘庆娥	≥35	35	1	刺激方案	1	180	≤10天	10	≤3000	1800	HCG	3	4	1	继发不孕	1.32	≤24	19.2	混合因素	7	13.08	1409	1.06	6	12.02	4.48	53	2	8	9.3	A	ICSI	4	0	4	1	2	2	0	否	是	移植	未妊娠
32	0	2018050106	沈丽丽	＜35	24	1	降调节方案	3	173.077	＞10天	13	≤3000	2250	HCG	3	0	0	原发不孕	2.47	≤24	21.5	男方因素	9	0.78	1586	1.77	8	7.48	5.16	47.71	1	16	14	A	ICSI	3	0	1	0	1	1	0	否	是	移植	已妊娠	临床妊娠	宫内妊娠	单胚胎停
2174	0	C00012216	苏风杰	≥35	48	4	拮抗剂方案	2	200	≤10天	8	≤3000	1600	HCG	10	3	1	继发不孕	0.75	＞24	26.7	女方因素	1	8.56	315	0.56	1	13.41	3.85	10	4	3	13.4	A	IVF	1	0	1	0	1	1	0	否	是	移植	未妊娠
218	0	2016060172	巩伟伟	＜35	28	1	降调节方案	3	243.75	＞10天	16	＞3000	3900	HCG	3	0	0	原发不孕	1.16	＞24	27.5	女方因素	8	2.34	1655	1.86	5	5.43	6.35	11	3	6	12.5	A	IVF	2	0	2	0	0	0	0	否	否	全胚冷冻
1079	0	C00015570	李林	≥35	36	2	拮抗剂方案	2	225	≤10天	9	≤3000	2025	HCG	1	1	0	继发不孕	2.27	≤24	22.6	女方因素	4	2.05	1556	0.48	4	5.64	2.11	21	2	9	1.08	A	IVF	0	1	1	0	0	0	0	否	否	全胚冷冻
875	0	2018010120	宫晓娜	≥35	40	2	降调节方案	3	136.364	＞10天	11	≤3000	1500	HCG	2	3	1	继发不孕	1.77	≤24	21.1	混合因素	5	0.78	1172	0.89	5	9.09	5.37	41.75	2	11	11.4	A	ICSI	2	0	2	2	2	2	0	否	是	移植	未妊娠
1803	0	C00015607	任成凤	＜35	28	1	拮抗剂方案	2	187.5	≤10天	10	≤3000	1875	双扳机	1	4	0	继发不孕	1.96	＞24	25.6	女方因素	2	5.97	535	0.69	3	10.82	3.2	67	1	6	11.8	A	IVF	2	0	0	0	0	0	0	是		无可移植胚胎
995	0	2017060284	胡小凤	≥35	48	2	刺激方案	1	150	≤10天	7	≤3000	1050	HCG	2	2	2	继发不孕	0.49	≤24	22.4	混合因素	4	4.89	1303	1.43	4	7.12	3.5	46.43	4	8	10.2	A	ICSI	2	0	1	0	0	0	0	否	否	全胚冷冻
859	0	2016110259	陈作梅	≥35	43	1	刺激方案	1	288.462	＞10天	13	＞3000	3750	HCG	1	3	1	继发不孕	1.09	＞24	27.5	女方因素	5	1.27	1271	0.26	5	7.26	7.68	34.76	4	9	11	B	IVF	4	0	2	0	0	0	0	否	否	全胚冷冻
891	0	C00004056	孙青	＜35	28	1	降调节方案	3	242.308	＞10天	13	＞3000	3150	HCG	3	0	0	原发不孕	3.87	≤24	22.3	混合因素	5	1.48	1066	0.98	2	7.91	5.03	21.47	1	16	10.6	A	ICSI	1	0	1	0	1	1	0	否	是	移植	未妊娠
1666	0	C00006408	黄喜欢	≥35	37	3	刺激方案	1	281.25	≤10天	8	≤3000	2250	HCG	10	0	0	原发不孕	1.76	≤24	22.3	混合因素	2	7.24	833	1.26	2	9.99	4.45	67	4	4	4.7	A-B	ICSI	2	0	1	0	0	0	0	否	否	全胚冷冻
723	0	2016020132	陶园	＜35	33	1	降调节方案	3	275	＞10天	11	＞3000	3025	HCG	2	1	0	继发不孕	1.12	≤24	19.2	女方因素	5	4.26	1557	2.01	4	7.85	5.67	55.42	3	7	10.7	B	IVF	3	0	2	1	0	0	0	否	否	全胚冷冻
74	0	2018030186	钊月月	＜35	26	1	降调节方案	3	207.692	＞10天	13	≤3000	2700	HCG	3	0	0	原发不孕	3.34	≤24	22.2	女方因素	9	0.96	2411	0.88	7	5.92	3.57	53	1	14	14.6	A-B	IVF	6	0	2	2	2	2	0	否	是	移植	未妊娠
40	0	2017100151	程爽	≥35	41	1	降调节方案	3	211.364	＞10天	11	≤3000	2325	HCG	1	2	1	继发不孕	2.21	≤24	20.8	女方因素	9	1.73	2304	0.86	9	5.5	5.86	31.75	2	15	11.3	A	IVF	6	0	4	3	0	0	0	否	否	全胚冷冻
1417	0	C00011714	游双慧	≥35	39	2	刺激方案	1	180	≤10天	10	≤3000	1800	双扳机	5	3	1	继发不孕	0.34	≤24	19.7	女方因素	3	18.45	848	1.4	2	14.7	6.43	49.09	4	3	7.2	B-C	IVF	1	0	1	1	0	0	0	否	否	全胚冷冻
719	0	C00012329	戚聿婷	＜35	34	1	降调节方案	3	225	＞10天	12	≤3000	2700	HCG	2	3	0	继发不孕	1.46	≤24	23.5	女方因素	5	3.03	1151	0.59	6	8.87	4.05	19	1	12	11.4	B	IVF	6	0	6	0	0	0	0	否	否	全胚冷冻
833	0	2018060139	范秋兰	≥35	35	1	降调节方案	3	150	≤10天	10	≤3000	1500	HCG	5	4	0	继发不孕	1.58	≤24	20.1	女方因素	5	1.37	1422	0.26	4	9.77	4.78	74	2	12	10.6	A	IVF	3	0	1	0	1	1	0	否	是	移植	已妊娠	临床妊娠	宫内妊娠	单胎宫内妊娠
136	0	2016030102	姚双	＜35	23	1	降调节方案	3	240	≤10天	10	≤3000	2400	HCG	1	3	0	继发不孕	2.45	≤24	21	女方因素	8	0.76	1544	1.34	8	5.19	4.68	25.75	1	16	11	A	IVF	4	0	3	1	2	2	0	否	是	移植	未妊娠
2118	0	2017110031	郭英霞	≥35	41	3	刺激方案	1	150	≤10天	7	≤3000	1050	HCG	1	2	1	继发不孕	1.24	＞24	30.8	混合因素	1	10.92	441	0.36	0	11.75	3.86	16	2	7	7.1	A		0	0	0	0	0	0	0	是		未取到卵
1390	0	C00008947	柳雅	≥35	41	3	刺激方案	1	150	＞10天	12	≤3000	1800	双扳机	16	0	0	原发不孕	1.09	＞24	28.6	混合因素	3	6.39	904	0.41	3	8.94	3.45	32	4	4	8.8	A-B	ICSI	2	0	1	0	0	0	0	否	否	全胚冷冻
1697	0	2016090219	张吉玲	≥35	36	1	刺激方案	1	225	≤10天	8	≤3000	1800	HCG	1	4	1	继发不孕	0.93	＞24	25.7	女方因素	2	1.31	757	0.33	3	5.23	2.51	42	4	5	6.8	B	IVF	3	0	1	0	0	0	0	否	否	全胚冷冻
1837	0	2016080077	王怀娜	＜35	26	5	拮抗剂方案	2	150	≤10天	5	≤3000	750	HCG	2	0	0	原发不孕	1.36	＞24	25.3	男方因素	2	4.66	470	1.22	2	14.5	8.39	64.78	3	4	13	B	ICSI	1	0	2	0	2	2	0	否	是	移植	未妊娠
2168	0	C00009676	付树清	≥35	49	1	刺激方案	1	225	≤10天	5	≤3000	1125	HCG	7	4	0	继发不孕	0.52	＞24	27.9	混合因素	1	6.2	324	0.11	1	13.6	2.07	10	4	2	0.52	B	ICSI	1	0	1	0	0	0	0	否	否	全胚冷冻
1795	0	C00016318	刘养栓	≥35	49	3	拮抗剂方案	2	150	≤10天	9	≤3000	1350	HCG	9	2	2	继发不孕	0.89	≤24	23.4	女方因素	2	8.09	547	0.69	2	7.44	2.68	33	4	5	9.5	A	IVF	0	0	0	0	0	0	0	是		无可移植胚胎
542	0	C00015684	宋海洁	＜35	33	6	拮抗剂方案	2	200	≤10天	7	≤3000	1400	HCG	2	1	1	继发不孕	1.83	≤24	23.9	混合因素	6	6.93	2035	0.85	5	11.83	5.3	68	1	10	1.13	A	ICSI	2	0	2	0	1	2	0	否	是	移植	未妊娠
1714	0	C00015189	李邦洪	≥35	44	3	拮抗剂方案	2	284.615	＞10天	13	＞3000	3700	HCG	1	2	2	继发不孕	0.85	＞24	25	混合因素	2	16.58	722	0.78	0	7.82	2.71	48	4	5	12.1	A-B		0	0	0	0	0	0	0	是		未取到卵
1033	0	2017120040	宋飞	＜35	32	1	降调节方案	3	234.091	＞10天	11	≤3000	2575	HCG	3	1	0	继发不孕	1.88	≤24	19.9	不明原因	4	2.82	1129	1.54	7	5.69	6.78	43	1	15	10	A	IVF	2	0	2	0	2	2	0	否	是	移植	已妊娠	临床妊娠	宫内妊娠	单胎宫内妊娠
1976	0	2016030189	耿洁	≥35	41	1	刺激方案	1	217.5	≤10天	10	≤3000	2175	双扳机	8	1	0	继发不孕	2.42	＞24	28.1	女方因素	2	7.92	435	0.69	4	9.32	2.9	25	2	9	5.8	A	IVF	3	0	1	0	0	0	0	否	否	全胚冷冻
380	0	C00012295	朱红红	＜35	24	1	拮抗剂方案	2	150	≤10天	7	≤3000	1050	HCG	2	0	0	原发不孕	3.08	≤24	22.8	女方因素	8	2.44	2399	0.48	8	6.12	6.87	32.34	1	15	1.19	A	IVF	6	0	6	1	2	2	0	否	是	移植	已妊娠	临床妊娠	宫内妊娠	单胎宫内妊娠
1874	0	2018030093	季洪芹	≥35	35	2	刺激方案	1	150	≤10天	7	≤3000	1050	HCG	6	2	1	继发不孕	2.54	＞24	27.1	女方因素	2	7.82	338	0.47	2	9.7	5.95	44.67	2	13	4.9	B	IVF	1	0	1	0	0	0	0	否	否	全胚冷冻
1825	0	2018050166	房燕	≥35	45	4	刺激方案	1	150	≤10天	8	≤3000	1200	HCG	1	3	1	继发不孕	1.2	≤24	24	女方因素	2	19.45	502	0.38	2	8.2	3.15	43.36	2	10	9	A	IVF	2	0	0	0	0	0	0	是		无可移植胚胎
798	0	C00017802	张天惠	＜35	26	2	拮抗剂方案	2	251.25	≤10天	10	≤3000	2512.5	HCG	3	0	0	原发不孕	3.03	≤24	23	女方因素	5	2.28	1641	0.86	6	7.55	3.94	22	1	12	1.07	A	IVF	2	2	4	0	0	0	0	否	否	全胚冷冻
143	0	2018060006	姜迎新	＜35	28	3	降调节方案	3	122.727	＞10天	11	≤3000	1350	HCG	1	2	0	继发不孕	2.94	≤24	19.7	女方因素	8	19.94	2233	0.99	6	5.12	4.63	34.56	1	14	8.3	A	IVF	0	0	0	0	0	0	0	是		无可移植胚胎
2013	0	2018060201	王晓峰	≥35	43	4	降调节方案	3	150	≤10天	9	≤3000	1350	HCG	3	3	2	继发不孕	0.45	≤24	22.6	女方因素	1	14.35	841	0.38	#NULL!	10.5	4.39	59.09	4	4	13.4	B-C		0	0	0	0	0	0	0	是		未取卵
744	0	2017070248	赵万方	≥35	37	1	降调节方案	3	234.375	≤10天	8	≤3000	1875	HCG	1	8	1	继发不孕	2.42	≤24	22.2	女方因素	5	5.61	1426.56	0.7	4	7.21	5.78	25.42	2	9	9	A	IVF	3	0	2	0	0	0	0	否	否	全胚冷冻
759	0	2017120278	李秀娣	≥35	43	3	拮抗剂方案	2	250	≤10天	4	≤3000	1000	HCG	2	4	1	继发不孕	0.6	＞24	24.8	混合因素	5	2.85	1343	0.54	5	16.45	5.49	89.48	4	5	11.3	A	ICSI	4	0	2	1	0	0	0	否	否	全胚冷冻
620	0	2017010123	魏凤梅	＜35	33	1	降调节方案	3	257.5	≤10天	10	≤3000	2575	HCG	4	0	0	继发不孕	1.77	≤24	23.1	女方因素	6	1.95	2190	0.82	6	6.27	3.43	25.42	1	12	13.1	A	IVF	6	0	6	0	0	0	0	否	否	全胚冷冻
2151	0	2017050044	高玉香	≥35	46	1	刺激方案	1	225	≤10天	6	≤3000	1350	HCG	3	2	1	继发不孕	0.43	＞24	24.2	女方因素	1	5.71	370	0.99	1	11.89	4.82	95.42	4	3	5.6	B	IVF	1	0	1	1	0	0	0	否	否	全胚冷冻
1277	0	C00019007	苏爱欣	≥35	38	1	拮抗剂方案	2	225	≤10天	7	≤3000	1575	HCG	9	2	1	继发不孕	2.42	≤24	20.4	女方因素	3	0.68	855.16	0.68	4	7.29	3.29	42	2	9	9.9	B	IVF	3	0	2	2	0	0	0	否	否	全胚冷冻
1160	0	2017030208	田艳	≥35	38	1	降调节方案	3	273.214	＞10天	14	＞3000	3825	HCG	2	0	0	原发不孕	2.52	≤24	22.1	混合因素	4	1.08	1228	0.42	7	6.32	2.79	56	2	11	9.2	A	ICSI	4	0	2	0	2	2	0	否	是	移植	未妊娠
2058	0	2017120055	林海燕	≥35	43	2	刺激方案	1	225	≤10天	10	≤3000	2250	HCG	10	0	0	继发不孕	0.87	＞24	28.2	不明原因	1	4.73	619	0.68	1	12.3	4.34	40.03	4	7	8	B	IVF	0	0	0	0	0	0	0	是		无可移植胚胎
1865	0	2016020020	娄本岭	＜35	29	1	刺激方案	1	150	≤10天	4	≤3000	600	HCG	1	2	1	继发不孕	1.1	＞24	27.3	女方因素	2	6.38	365	1.21	2	9.69	4.11	91	3	3	11.4	A-B	IVF	2	0	0	0	0	0	0	是		无可移植胚胎
386	0	C00014974	陈双	＜35	33	1	拮抗剂方案	2	281.25	≤10天	8	≤3000	2250	HCG	4	2	0	继发不孕	2.26	＞24	24.7	女方因素	7	4	1554	1.02	5	8.33	2.17	45	1	8	13.7	A	IVF	5	0	2	1	2	2	0	否	是	移植	未妊娠
930	0	C00019332	孟凤娟	≥35	37	2	刺激方案	1	253.846	＞10天	13	＞3000	3300	HCG	3	2	1	继发不孕	1.4	≤24	20.7	女方因素	4	41.17	862.71	2.27	2	10.64	4.49	69.09	2	8	9.2	A	IVF	1	0	0	0	0	0	0	是		无可移植胚胎
2205	0	2016010053	吴绪连	≥35	48	1	降调节方案	3	112.5	≤10天	6	≤3000	675	HCG	1	1	1	继发不孕	0.19	≤24	20.8	混合因素	1	19.25	251	1.29	#NULL!	13.43	4.55	67	4	4	5.8	A		0	0	0	0	0	0	0	是		未取卵
777	0	C00018201	马文爽	≥35	35	2	刺激方案	1	150	＞10天	11	≤3000	1650	HCG	7	0	0	原发不孕	1.2	≤24	18.7	混合因素	5	1.34	1771	0.68	2	7.23	5.13	69.09	2	5	10.2	A-B	ICSI	1	0	1	0	0	0	0	否	否	全胚冷冻
161	0	C00018424	黄纪凤	＜35	30	1	降调节方案	3	261.765	＞10天	17	＞3000	4450	HCG	4	0	0	原发不孕	1.86	≤24	17.6	不明原因	8	1.08	1793	1.08	7	8.22	8.17	46.5	1	13	16.6	A	IVF	3	0	1	1	1	1	0	否	是	移植	未妊娠
2033	0	C00015422	史建叶	≥35	39	6	刺激方案	1	150	≤10天	8	≤3000	1200	HCG	2	3	0	继发不孕	0.3	≤24	23.3	女方因素	1	20.04	704	1.11	1	14.86	7.07	58.39	4	5	4		IVF	1	0	1	0	0	0	0	否	否	全胚冷冻
1651	0	2017100124	李相峰	≥35	39	2	拮抗剂方案	2	250	≤10天	10	≤3000	2500	HCG	3	2	1	继发不孕	1.78	≤24	20.5	男方因素	2	1.59	862	0.14	7	4.77	3.01	55.05	2	11	13.4	A	ICSI	6	0	4	1	2	2	0	否	是	移植	未妊娠
1036	0	2017100166	李秀亭	≥35	46	1	刺激方案	1	225	≤10天	8	≤3000	1800	HCG	2	2	0	继发不孕	0.54	≤24	21.2	女方因素	4	4.57	1122	0.92	3	11.48	3.46	21	4	6	8	B	IVF	0	0	0	0	0	0	0	是		未受精
2149	0	2016010163	王怀娜	＜35	26	3	刺激方案	1	150	≤10天	6	≤3000	900	HCG	2	0	0	原发不孕	0.81	＞24	25.3	男方因素	1	3	374	1.07	3	14.5	8.39	64.78	3	4	12	A	ICSI	2	0	1	1	1	1	0	否	是	移植	未妊娠
1482	0	C00009329	叶丽杰	≥35	37	2	刺激方案	1	225	≤10天	10	≤3000	2250	HCG	8	0	0	原发不孕	2.32	＞24	24.3	混合因素	3	22.33	854.39	0.46	2	8.52	5.33	40.8	2	11	6.6	A	ICSI	1	0	1	0	0	0	0	否	否	全胚冷冻
1194	0	C00012431	张蒙蒙	＜35	34	3	刺激方案	1	158.333	≤10天	9	≤3000	1425	双扳机	1	0	0	原发不孕	1.1	≤24	22.2	女方因素	4	9.21	1076	0.5	4	11.75	5.74	83	3	5	#NULL!		IVF	4	0	4	2	0	0	0	否	否	全胚冷冻
876	0	2017010020	闫磊	＜35	30	1	降调节方案	3	176.786	＞10天	14	≤3000	2475	HCG	1	0	0	继发不孕	2.5	＞24	29.9	女方因素	5	1.49	1168	0.27	4	7.26	8.33	91.75	1	7	11.5	B	IVF	4	0	0	0	0	0	0	是		无可移植胚胎
320	0	C00018399	谢琳	≥35	37	2	降调节方案	3	256.25	＞10天	12	＞3000	3075	HCG	1	1	0	继发不孕	1.51	≤24	17.9	男方因素	7	0.58	2174.76	0.83	5	8.77	6.68	65	2	11	#NULL!		ICSI	4	0	2	1	0	0	0	否	否	全胚冷冻
470	0	2017050093	姜林君	＜35	28	2	刺激方案	1	215.625	≤10天	8	≤3000	1725	HCG	3	0	0	原发不孕	3.05	≤24	22.4	男方因素	6	1.11	1814	1.37	6	7.32	2.26	49.09	1	10	14.7		ICSI	4	0	1	0	0	0	0	否	否	全胚冷冻
2162	0	2016040171	李如香	≥35	40	1	拮抗剂方案	2	182.143	≤10天	7	≤3000	1275	HCG	8	1	1	继发不孕	0.61	＞24	24.8	混合因素	1	18.64	339	0.61	#NULL!	10.57	5.03	44.98	4	4	8	A-B		0	0	0	0	0	0	0	是		未取卵
44	0	C00006371	王道利	≥35	35	1	降调节方案	3	240	≤10天	10	≤3000	2400	HCG	6	1	1	继发不孕	2.13	＞24	26.4	女方因素	9	0.41	2155	0.68	9	7.52	3.42	28	2	20	15.8	A-B	IVF	2	0	0	0	0	0	0	是		无可移植胚胎
888	0	C00015288	刘养栓	≥35	48	1	拮抗剂方案	2	215.625	≤10天	8	≤3000	1725	HCG	9	2	2	继发不孕	0.31	≤24	23.4	女方因素	5	9.5	1092	0.8	2	7.44	2.68	33	4	5	14	A	IVF	0	0	0	0	0	0	0	是		无可移植胚胎
904	0	C00012266	朱吉芳	≥35	44	1	拮抗剂方案	2	276.923	＞10天	13	＞3000	3600	双扳机	2	1	0	继发不孕	0.94	＞24	25.4	女方因素	5	8.53	1237	1.38	2	18.22	6.78	23	4	4	5.9	A	IVF	1	0	1	0	0	0	0	否	否	全胚冷冻
1878	0	2016050205	宋景华	≥35	49	1	刺激方案	1	150	≤10天	9	≤3000	1350	HCG	9	1	1	继发不孕	0.54	＞24	28	女方因素	2	5.33	291	1.22	1	6.09	2.76	53.77	4	2	3	B	IVF	1	0	1	0	0	0	0	否	否	全胚冷冻
1432	0	C00015840	李秀梅	≥35	40	3	拮抗剂方案	2	257.143	≤10天	7	≤3000	1800	HCG	5	2	1	继发不孕	1.51	＞24	24.8	混合因素	3	1.96	946	0.9	3	14.86	6.02	62	2	8	5.3	A	ICSI	3	0	2	0	0	0	0	否	否	全胚冷冻
1072	0	2017020211	孟玲	≥35	44	1	降调节方案	3	175	＞10天	12	≤3000	2100	HCG	2	3	1	继发不孕	1.00	≤24	23.7	女方因素	4	9.5	1569	0.44	5	5.95	4.22	40	4	7	12.9	B	IVF	2	0	2	2	2	2	0	否	是	移植	已妊娠	临床妊娠	宫内妊娠	单胚胎停
1283	0	2016010123	徐传梅	＜35	34	1	降调节方案	3	233.333	＞10天	12	≤3000	2800	HCG	3	1	1	继发不孕	1.22	≤24	23.4	混合因素	3	1.24	828	1.38	2	8.68	2.28	43	1	7	10.2	A	ICSI	1	0	1	0	1	1	0	否	是	移植	未妊娠
2215	0	2018070047	郇长花	≥35	41	3	拮抗剂方案	2	225	≤10天	6	≤3000	1350	HCG	2	1	1	继发不孕	0.66	＞24	27.2	混合因素	1	3.25	219	0.38	1	15.28	6.25	55.46	4	5	9.9	B	ICSI	1	0	1	0	1	1	0	否	是	移植	未妊娠
963	0	C00012313	刘萍	≥35	41	2	拮抗剂方案	2	245.455	＞10天	11	≤3000	2700	HCG	2	2	0	继发不孕	1.67	≤24	18.6	女方因素	4	1.09	389	0.74	2	10.77	6.86	53	2	10	15.3	B	IVF	1	0	1	0	0	0	0	否	否	全胚冷冻
1572	0	2017080269	夏燕	≥35	49	8	刺激方案	1	150	＞10天	11	≤3000	1650	HCG	13	0	0	原发不孕	0.47	＞24	27.7	女方因素	3	14.82	1072	0.5	2	15.48	4.24	96.43	4	4	7	B	IVF	2	0	2	2	0	0	0	否	否	全胚冷冻
1509	0	2017040021	陈娟	≥35	39	3	刺激方案	1	150	≤10天	9	≤3000	1350	HCG	2	1	1	继发不孕	1.6	＞24	29	男方因素	3	11.52	887	0.65	3	7.09	8.61	38.43	2	11	8.3	B	ICSI	1	0	1	1	0	0	0	否	否	全胚冷冻
718	0	2017020091	亓惠	≥35	37	1	降调节方案	3	225	＞10天	13	≤3000	2925	HCG	3	4	4	继发不孕	2.45	＞24	24.7	女方因素	5	1.76	1588	0.61	8	7.69	4.75	29.6	2	14	9	A	IVF	7	0	4	1	2	2	0	否	是	移植	已妊娠	临床妊娠	宫内妊娠	单胎宫内妊娠
82	0	2017040036	李澍	≥35	35	3	刺激方案	1	183.333	≤10天	9	≤3000	1650	HCG	2	1	1	继发不孕	2.59	≤24	19.8	女方因素	9	8.78	2232	0.59	8	7.65	5.6	53.77	2	16	6.4	A	IVF	7	0	0	0	0	0	0	是		无可移植胚胎
1968	0	C00006893	孟颜	≥35	37	2	刺激方案	1	212.5	≤10天	6	≤3000	1275	双扳机	2	4	1	继发不孕	0.29	＞24	28	女方因素	2	6.48	464	0.55	3	11.82	4.59	17.33	4	5	15.8	B	IVF	3	0	2	1	0	0	0	否	否	全胚冷冻
2137	0	C00012777	田秀娟	＜35	32	1	拮抗剂方案	2	275	≤10天	6	≤3000	1650	HCG	2	2	1	继发不孕	0.78	＞24	31.3	男方因素	1	1.97	392	0.21	2	14.84	3.24	55	3	4	7.4	B	ICSI	2	0	2	0	2	2	0	否	是	移植	已妊娠	临床妊娠	宫内妊娠	单胎宫内妊娠
856	0	2017080217	颜红	＜35	27	3	降调节方案	3	150	＞10天	12	≤3000	1800	HCG	2	0	0	原发不孕	1.86	＞24	25.3	混合因素	5	0.69	1285	0.58	4	7.67	5.13	34.67	1	7	12.3	A	ICSI	4	0	2	0	2	2	0	否	是	移植	已妊娠	临床妊娠	宫内妊娠	单胎宫内妊娠
1908	0	2017100139	贾秀萍	≥35	36	2	刺激方案	1	150	＞10天	11	≤3000	1650	双扳机	2	2	1	继发不孕	0.66	≤24	21.3	女方因素	2	10.89	506	0.71	2	13.16	6.61	87.7	4	5	6.8	B	IVF	2	0	1	1	0	0	0	否	否	全胚冷冻
1018	0	C00011733	汪芳	＜35	32	4	刺激方案	1	285	≤10天	10	≤3000	2850	HCG	2	1	0	继发不孕	1.83	≤24	19	男方因素	4	15.24	1198	2.06	2	8.24	3.97	35.85	1	7	0.52	A-B	ICSI	1	0	0	0	0	0	0	是		无可移植胚胎
2146	0	C00016524	周升花	≥35	50	5	刺激方案	1	150	≤10天	7	≤3000	1050	双扳机	5	2	1	继发不孕	0.42	≤24	23.3	男方因素	1	5.43	377	0.76	1	6.47	2.78	49	4	4	6	B	ICSI	0	0	0	0	0	0	0	是		未受精
1561	0	C00003765	王淑霞	≥35	42	2	刺激方案	1	150	≤10天	7	≤3000	1050	HCG	3	2	1	继发不孕	1.12	＞24	25.9	女方因素	3	5.18	1105	0.95	2	8.62	4.49	90.1	4	4	8	B	IVF	0	0	1	0	0	0	0	否	否	全胚冷冻
1827	0	2016070054	邹静静	≥35	42	2	刺激方案	1	247.5	≤10天	10	≤3000	2475	HCG	3	3	1	继发不孕	0.36	≤24	22.1	女方因素	2	0.76	497	0.35	2	9.39	2.95	25.69	4	5	9.5		IVF	2	0	2	0	0	0	0	否	否	全胚冷冻
221	0	C00005318	翟钰	＜35	32	1	降调节方案	3	265.385	＞10天	13	＞3000	3450	HCG	1	2	0	继发不孕	1.96	≤24	20.3	女方因素	8	1.15	1613	0.42	9	8.69	6.49	42	1	14	17.9	B	IVF	2	1	2	0	0	0	0	否	否	全胚冷冻
1167	0	C00013006	张莎莎	＜35	32	1	拮抗剂方案	2	203.571	≤10天	7	≤3000	1425	HCG	2	1	1	继发不孕	1.13	＞24	25	女方因素	4	6.56	1195	0.83	2	7.99	4.2	83	3	8	9.7	A	IVF	1	0	1	0	1	1	0	否	是	移植	未妊娠
133	0	2017030203	黄玲玲	＜35	26	1	降调节方案	3	156.25	＞10天	12	≤3000	1875	HCG	1	4	0	继发不孕	2.27	≤24	20	女方因素	8	1.07	1690	0.97	9	6.52	3.66	44	1	18	8.3	B	IVF	6	0	4	1	2	2	0	否	是	移植	已妊娠	临床妊娠	宫内妊娠	双胎宫内妊娠
1092	0	C00008571	李媛媛	≥35	39	5	刺激方案	1	281.25	≤10天	8	≤3000	2250	HCG	1	4	1	继发不孕	2.55	＞24	26.7	女方因素	4	10.18	1472	1.01	4	5.98	2.24	51	2	8	0.73	A-B	IVF	3	0	2	0	0	0	0	否	否	全胚冷冻
1321	0	C00012985	李九荣	≥35	39	1	刺激方案	1	225	≤10天	5	≤3000	1125	HCG	8	3	1	继发不孕	0.41	≤24	22.5	女方因素	3	14.16	692	0.53	3	6.9	3.67	42.91	4	5	6.8	B-C	IVF	3	0	2	0	0	0	0	否	否	全胚冷冻
1893	0	2016070166	汲君	≥35	46	2	刺激方案	1	270	≤10天	10	≤3000	2700	HCG	3	3	0	继发不孕	0.61	≤24	21.4	女方因素	2	22.67	196	1.42	#NULL!	15.9	4.42	42	4	3	6.5	A		0	0	0	0	0	0	0	是		未取卵
1356	0	C00005423	耿雪	＜35	31	7	拮抗剂方案	2	250	≤10天	9	≤3000	2250	双扳机	3	1	0	继发不孕	0.45	≤24	19	女方因素	3	0.9	554	0.79	3	7.32	3.51	76.43	3	5	10	A-B	IVF	1	0	1	1	1	1	0	否	是	移植	已妊娠	临床妊娠	宫内妊娠	单胚胎停
1468	0	C00005218	何华珍	≥35	48	1	刺激方案	1	259.615	＞10天	13	＞3000	3375	双扳机	1	6	2	继发不孕	0.32	≤24	19.6	女方因素	3	6.75	952	0.97	1	5.23	2.51	42	4	4	4.6	B	IVF	1	0	1	1	0	0	0	否	否	全胚冷冻
2047	0	2016070068	张秀芝	≥35	46	4	刺激方案	1	150	≤10天	6	≤3000	900	HCG	3	4	0	继发不孕	0.55	≤24	21.4	混合因素	1	11.01	656	0.57	2	10.4	6.78	46	4	3	12.2	A-B	ICSI	2	0	2	0	0	0	0	否	否	全胚冷冻
1629	0	2016080201	王传冬	≥35	42	3	刺激方案	1	287.5	＞10天	12	＞3000	3450	HCG	2	4	1	继发不孕	1.0	＞24	25.4	混合因素	2	1.1	912	1	2	12.89	6.72	25.52	4	5	7	B	ICSI	1	0	1	0	0	0	0	否	否	全胚冷冻
325	0	C00012919	段瑜	＜35	30	2	拮抗剂方案	2	256.25	≤10天	8	≤3000	2050	HCG	3	0	0	原发不孕	3.76	≤24	19.1	男方因素	7	4.61	2129	1.12	7	6.95	3.65	39	1	12	11.5	A	ICSI	4	0	2	0	2	2	0	否	是	移植	已妊娠	临床妊娠	宫内妊娠	单胎宫内妊娠
1057	0	C00007916	李丹妮	＜35	28	1	刺激方案	1	225	≤10天	8	≤3000	1800	HCG	4	0	0	原发不孕	2.75	≤24	20.1	混合因素	4	6.44	1681	0.92	5	19.49	4.07	33	1	7	6.4	A-B	ICSI	5	0	3	2	0	0	0	否	否	全胚冷冻
97	0	2017060175	赵爱萍	≥35	38	1	降调节方案	3	271.154	＞10天	13	＞3000	3525	HCG	2	1	1	继发不孕	1.55	≤24	21.9	女方因素	9	3.68	1936	1.73	9	7.25	3.03	37.66	2	11	16.9	B	IVF	7	0	3	1	0	0	0	否	否	全胚冷冻
1984	0	C00010793	邱文	≥35	41	3	刺激方案	1	225	≤10天	9	≤3000	2025	HCG	3	5	1	继发不孕	1.8	＞24	28.7	女方因素	2	13.69	404	0.63	1	7.83	2.78	33	2	8	7.3	B	IVF	0	0	1	0	0	0	0	否	否	全胚冷冻
1989	0	2018040149	王芳	≥35	45	1	刺激方案	1	225	≤10天	7	≤3000	1575	HCG	1	0	0	原发不孕	0.42	≤24	23.6	女方因素	2	10	405	0.43	2	7.74	2.36	60.56	4	8	4.8	A	IVF	2	0	1	0	0	0	0	否	否	全胚冷冻
1739	0	C00004804	于承利	≥35	38	1	拮抗剂方案	2	150	≤10天	7	≤3000	1050	HCG	1	5	1	继发不孕	1.29	≤24	20	女方因素	2	1.8	651	0.27	2	16.54	4.3	35	2	8	6.6	A	IVF	2	0	0	0	0	0	0	是		无可移植胚胎
1734	0	C00018370	辛园园	＜35	34	2	拮抗剂方案	2	225	＞10天	11	≤3000	2475	HCG	1	0	0	原发不孕	2.03	≤24	17.5	男方因素	2	6.06	668.53	0.68	2	13.4	6.5	26	1	9	11.1	A	ICSI	1	0	1	0	1	1	0	否	是	移植	未妊娠
826	0	2017090202	吴磊	≥35	35	1	降调节方案	3	150	＞10天	11	≤3000	1650	HCG	3	0	0	原发不孕	2.24	＞24	24.4	女方因素	10	3.06	2204	0.8	9	8.26	3.94	49.09	2	13	13	A	IVF	8	0	7	3	2	2	0	否	是	移植	已妊娠	临床妊娠	宫内妊娠	双胎宫内妊娠
1084	0	C00007135	王娟	≥35	51	1	拮抗剂方案	2	283.333	＞10天	12	＞3000	3400	HCG	1	1	1	继发不孕	0.2	＞24	30.1	女方因素	4	3.19	1505	0.5	5	11.76	5.83	29	4	5	11.5	A	IVF	4	0	2	0	2	2	0	否	是	移植	未妊娠
1804	0	C00016582	张芬	≥35	42	4	拮抗剂方案	2	163.636	＞10天	11	≤3000	1800	HCG	6	3	1	继发不孕	1.01	＞24	26.7	女方因素	2	3.41	534	0.54	2	10.98	4.64	32	4	6	10.5	A-B	IVF	2	0	2	0	0	0	0	否	否	全胚冷冻
2079	0	2017100240	生兆英	≥35	47	2	拮抗剂方案	2	243.182	＞10天	11	≤3000	2675	HCG	1	4	1	继发不孕	0.13	≤24	21.6	女方因素	1	14.27	521	2.3	#NULL!	17.15	9.78	79.67	4	3	12	A-B		0	0	0	0	0	0	0	是		未取卵
1967	0	C00017427	王占香	≥35	42	1	刺激方案	1	272.727	＞10天	11	≤3000	3000	HCG	2	4	2	继发不孕	1.48	＞24	24.9	女方因素	2	13.15	468	0.95	2	10.52	6.12	63	2	8	6	B	IVF	1	0	0	0	0	0	0	是		无可移植胚胎
1783	0	C00003667	郑妮	≥35	35	3	刺激方案	1	283.929	＞10天	14	＞3000	3975	HCG	2	2	1	继发不孕	1.3	＞24	24.4	女方因素	2	2.16	576	0.57	2	8.5	2.39	31.76	2	10	8.1	A-B	IVF	1	0	0	0	0	0	0	是		无可移植胚胎
49	0	2016060219	杜军红	＜35	31	4	降调节方案	3	242.308	＞10天	13	＞3000	3150	HCG	4	0	0	原发不孕	2.11	≤24	23.4	混合因素	9	3.89	2027	0.56	7	9.62	5.36	42.7	1	16	11	B	ICSI	3	0	1	1	0	0	0	否	否	全胚冷冻
413	0	C00007851	谭宁	≥35	41	1	刺激方案	1	180	≤10天	10	≤3000	1800	HCG	6	1	0	继发不孕	0.33	＞24	27.2	女方因素	7	6.35	1186	0.39	2	11.65	4.62	68	4	5	0.9	B	IVF	0	1	1	0	0	0	0	否	否	全胚冷冻
1701	0	C00011340	乔秀颐	≥35	40	3	拮抗剂方案	2	150	≤10天	5	≤3000	750	HCG	1	0	0	原发不孕	1.5	≤24	20.4	女方因素	2	2.1	752	0.28	2	6.77	2.21	73	2	9	0.9	A-B	IVF	1	0	1	1	1	1	0	否	是	移植	已妊娠	临床妊娠	宫外妊娠	异位妊娠
1223	0	2016030172	卢伟	≥35	45	2	降调节方案	3	285	≤10天	10	≤3000	2850	HCG	15	2	1	继发不孕	0.22	≤24	22	女方因素	3	4.84	982	1.17	3	12.89	5.49	46.98	4	4	8.1	B-C	IVF	1	0	1	0	1	1	0	否	是	移植	未妊娠
585	0	2016110128	朱小雯	≥35	35	1	降调节方案	3	280.357	＞10天	14	＞3000	3925	HCG	4	3	1	继发不孕	1.89	＞24	31.2	女方因素	6	1.51	1597	0.65	7	9.73	5.45	42	2	10	11.7	B	IVF	7	0	4	3	2	2	0	否	是	移植	已妊娠	临床妊娠	宫内妊娠	双胎宫内妊娠
472	0	2017080268	仪美娟	≥35	36	1	降调节方案	3	256.25	≤10天	10	≤3000	2562.5	HCG	1	3	1	继发不孕	1.62	＞24	24.2	不明原因	6	3.77	1798	0.8	9	9.12	4.95	76.43	2	12	11	B	ICSI	6	0	2	2	0	0	0	否	否	全胚冷冻
432	0	C00007820	王燕	≥35	42	1	降调节方案	3	212.5	＞10天	14	≤3000	2975	HCG	2	3	1	继发不孕	2.58	＞24	24.8	女方因素	6	1.98	865	0.9	6	8.48	3.12	10	2	9	1.25	A	IVF	4	0	3	2	2	2	0	否	是	移植	已妊娠	临床妊娠	宫内妊娠	单胎宫内妊娠
381	0	C00016942	刘文欣	≥35	40	1	拮抗剂方案	2	200	≤10天	10	≤3000	2000	HCG	7	1	0	继发不孕	1.53	≤24	18.5	女方因素	8	3.22	2650	1.18	9	8.5	4.2	35.4	2	13	10	A	IVF	6	0	6	3	2	2	0	否	是	移植	未妊娠
606	0	2016120032	李秀粉	≥35	40	1	刺激方案	1	283.333	≤10天	9	≤3000	2550	HCG	2	3	1	继发不孕	1.51	≤24	23.3	女方因素	6	1	1458	0.54	5	6.12	4.31	35.42	2	7	9.3	A	IVF	4	0	1	0	1	1	0	否	是	移植	未妊娠
1184	0	2016120182	路云	≥35	45	2	刺激方案	1	225	≤10天	9	≤3000	2025	HCG	1	3	1	继发不孕	0.86	＞24	24.3	女方因素	4	3.26	1122	0.51	5	9.13	4.04	59	4	6	5	B	IVF	2	0	0	0	0	0	0	是		无可移植胚胎
751	0	C00011989	刘文茹	＜35	27	2	刺激方案	1	225	≤10天	7	≤3000	1575	HCG	2	0	0	原发不孕	1.41	＞24	26.7	女方因素	5	6.36	1398	0.78	3	7.58	2.76	27	1	10	1.1	B-C	IVF	3	0	2	0	0	0	0	否	否	全胚冷冻
1280	0	C00008525	张芹	＜35	32	2	降调节方案	3	233.654	＞10天	13	＞3000	3037.5	HCG	4	1	1	继发不孕	2.76	≤24	20	混合因素	3	1.78	848	0.67	1	10.64	4.9	52	1	11	9.2	A	ICSI	1	0	0	0	0	0	0	是		无可移植胚胎
762	0	2017050227	刘芳琼	≥35	41	2	刺激方案	1	283.333	≤10天	9	≤3000	2550	HCG	3	4	1	继发不孕	2.24	≤24	20.5	女方因素	5	9.65	1302	1.73	3	10.67	4.72	38.65	2	9	9.7	A	IVF	1	0	0	0	0	0	0	是		无可移植胚胎
81	0	2017120153	刘立杰	＜35	31	1	降调节方案	3	257.143	＞10天	14	＞3000	3600	HCG	1	0	0	原发不孕	2.56	＞24	24.8	女方因素	9	2.35	2250	1.05	9	8.77	3.34	45.98	1	18	12.3	A	IVF	4	0	2	0	0	0	0	否	否	全胚冷冻
2196	0	C00015289	罗玉林	≥35	40	2	拮抗剂方案	2	100	≤10天	6	≤3000	600	HCG	2	4	1	继发不孕	0.36	≤24	23	混合因素	1	6.83	270	0.71	1	8.61	3.38	40.09	4	5	8	A	ICSI	1	0	1	1	1	1	0	否	是	移植	未妊娠
1937	0	2018010126	张玉清	≥35	36	1	刺激方案	1	287.5	＞10天	12	＞3000	3450	HCG	3	1	1	继发不孕	1.92	≤24	20	男方因素	2	12.96	422	0.46	1	5.72	4.96	58.4	2	7	5.8	B	IVF	0	0	0	0	0	0	0	是		无可移植胚胎
27	0	2016080161	刘艳霞	＜35	32	2	降调节方案	3	289.286	＞10天	14	＞3000	4050	HCG	6	0	0	原发不孕	2.1	≤24	20.3	混合因素	10	1.5	1621	1.02	8	10.13	2.32	25.42	1	16	#NULL!		ICSI	4	0	1	0	1	1	0	否	是	移植	未妊娠
1792	0	2016040269	王丽红	＜35	33	1	降调节方案	3	265.385	＞10天	13	＞3000	3450	HCG	3	3	1	继发不孕	2.35	＞24	29.1	混合因素	2	1.74	556	0.5	2	8.76	8.22	42	1	12	16.7	A-B	ICSI	1	0	1	0	0	0	0	否	否	全胚冷冻
2200	0	C00006659	史如芹	≥35	50	2	刺激方案	1	225	≤10天	10	≤3000	2250	HCG	7	1	0	继发不孕	0.59	＞24	26.2	男方因素	1	11.19	258	0.49	1	9.49	4.71	12	4	2	8	B	ICSI	0	0	0	0	0	0	0	是		无可移植胚胎
212	0	C00013293	安姗	＜35	33	2	降调节方案	3	284.615	＞10天	13	＞3000	3700	HCG	4	0	0	原发不孕	2.85	＞24	26	混合因素	8	1.19	1763	0.97	9	8.91	3.5	16	1	18	11	A	ICSI	6	0	2	0	2	2	0	否	是	移植	已妊娠	临床妊娠	宫内妊娠	单胚胎停
159	0	C00012263	杨春荣	≥35	43	3	拮抗剂方案	2	212.5	≤10天	8	≤3000	1700	HCG	3	1	1	继发不孕	0.82	≤24	23	女方因素	8	3.8	1823	0.97	4	12.08	4.74	69	4	7	1.08	A-B	IVF	1	0	1	0	0	0	0	否	否	全胚冷冻
1987	0	2017020079	邢爱景	≥35	48	4	刺激方案	1	150	≤10天	8	≤3000	1200	HCG	1	0	0	继发不孕	0.33	≤24	22.8	女方因素	2	5.73	406	0.73	1	16.93	7.95	75	4	2	5.2	A	IVF	0	0	0	0	0	0	0	是		未受精
1370	0	2018010087	魏洁	≥35	35	1	刺激方案	1	278.571	≤10天	7	≤3000	1950	HCG	10	0	0	原发不孕	2.55	＞24	24.6	女方因素	3	6.65	491	0.3	1	5.14	2.12	31.75	2	8	7.8	B	IVF	1	0	1	0	0	0	0	否	否	全胚冷冻
1189	0	C00016488	柳萌萌	≥35	40	1	刺激方案	1	225	≤10天	8	≤3000	1800	HCG	10	0	0	原发不孕	0.29	≤24	21.2	女方因素	4	1.9	1101	0.67	3	17.64	4.45	41	4	7	10	A	IVF	0	0	0	0	0	0	0	是		无可移植胚胎
1750	0	C00011926	陈泽玲	＜35	31	1	拮抗剂方案	2	235.714	≤10天	7	≤3000	1650	HCG	7	0	0	原发不孕	1.64	＞24	31.2	混合因素	2	3.48	631	0.35	2	5.16	2.16	44	1	10	11.4	B	ICSI	1	0	0	0	0	0	0	是		无可移植胚胎
1266	0	2017050159	夏燕	≥35	48	7	刺激方案	1	225	≤10天	8	≤3000	1800	HCG	13	0	0	原发不孕	0.71	＞24	27.7	女方因素	3	9.98	882	1.94	3	15.48	4.24	96.43	4	5	6	B	IVF	2	0	2	2	0	0	0	否	否	全胚冷冻
345	0	C00018353	王靖	≥35	39	1	拮抗剂方案	2	275	≤10天	8	≤3000	2200	HCG	1	0	0	原发不孕	1.92	≤24	22	女方因素	7	10.03	1872.97	1.29	6	12.08	5.11	77.62	2	10	9.2	A	IVF	3	0	0	0	0	0	0	是		无可移植胚胎
1814	0	C00004523	韩丽萍	≥35	47	5	拮抗剂方案	2	272.222	≤10天	9	≤3000	2450	双扳机	16	0	0	原发不孕	0.64	＞24	26	男方因素	2	5.6	522	0.38	3	6.37	6.35	26	4	5	8.4	A	ICSI	3	0	2	1	0	0	0	否	否	全胚冷冻
302	0	2017010058	王一帆	＜35	33	1	降调节方案	3	207.5	≤10天	10	≤3000	2075	HCG	2	0	0	继发不孕	2.83	≤24	22.6	不明原因	10	3.37	1641	0.87	7	8.28	2.37	36.43	1	12	17	B	IVF	7	0	6	1	0	0	0	否	否	全胚冷冻
1618	0	2017020151	李芹	≥35	50	4	刺激方案	1	150	≤10天	6	≤3000	900	HCG	9	4	1	继发不孕	0.82	＞24	24.2	女方因素	2	8.14	956	1.2	1	17.78	4.26	65.69	4	4	6.2	B	IVF	1	0	0	0	0	0	0	是		无可移植胚胎
997	0	2016110274	范维红	≥35	43	1	刺激方案	1	283.333	≤10天	9	≤3000	2550	HCG	15	0	0	原发不孕	0.52	≤24	22.2	女方因素	4	5.34	1297	1.41	1	7.87	3.15	60	4	3	10.9	A-B	IVF	0	0	0	0	0	0	0	是		无可移植胚胎
65	0	2018050121	田安红	＜35	31	1	降调节方案	3	230.769	＞10天	13	≤3000	3000	HCG	1	2	0	继发不孕	3.03	≤24	23.7	女方因素	9	1.01	2618	0.89	8	5.78	2.65	31.76	1	14	10.7	A	IVF	2	0	2	0	2	2	0	否	是	移植	已妊娠	临床妊娠	宫内妊娠	双胎宫内妊娠
1444	0	C00006182	高井红	≥35	44	3	刺激方案	1	225	≤10天	6	≤3000	1350	HCG	10	3	2	继发不孕	0.91	≤24	21.3	女方因素	3	4.1	913	0.68	3	18.93	6.29	59	4	8	9.2	A	IVF	3	0	2	0	2	2	0	否	是	移植	未妊娠
788	0	2017120149	李云芳	＜35	29	1	降调节方案	3	238.636	＞10天	11	≤3000	2625	HCG	1	0	0	原发不孕	2.4	≤24	21.5	女方因素	5	0.3	1687	1.86	4	9.82	5.6	35	1	12	9.4	A	IVF	2	0	2	2	2	2	0	否	是	移植	已妊娠	临床妊娠	宫内妊娠	双胎宫内妊娠
774	0	2016050125	潘玉红	≥35	42	1	刺激方案	1	262.5	≤10天	8	≤3000	2100	HCG	1	2	1	继发不孕	0.22	＞24	30	女方因素	5	4.68	1786	1.47	4	5.3	3.2	21	4	7	#NULL!		IVF	0	0	0	0	0	0	0	是		未受精
25	0	2018060112	孙美华	＜35	34	1	降调节方案	3	225	≤10天	8	≤3000	1800	HCG	7	1	0	原发不孕	2.5	≤24	23.3	不明原因	10	0.88	1839	3.6	7	6.27	4.14	34.76	1	11	9.9	B	IVF	4	0	4	3	2	2	0	否	是	移植	已妊娠	临床妊娠	宫内妊娠	单胚胎停
1165	0	C00009648	韩金荣	＜35	34	1	拮抗剂方案	2	210	≤10天	10	≤3000	2100	HCG	6	0	0	原发不孕	3.08	≤24	22.8	女方因素	4	3.8	1202	0.48	3	6.98	3.53	34.9	1	10	13.1	A-B	IVF	3	0	2	0	2	2	0	否	是	移植	已妊娠	临床妊娠	宫内妊娠	单胚胎停
1288	0	C00010869	杜蕾蕾	＜35	28	1	拮抗剂方案	2	237.5	≤10天	8	≤3000	1900	HCG	6	0	0	原发不孕	1.13	≤24	16.8	女方因素	3	4.33	813	1.49	3	10.95	4	48	3	7	11.1	A	IVF	1	1	1	0	1	0	1	否	是	移植	未妊娠
1741	0	C00010489	武文波	≥35	44	6	刺激方案	1	195	≤10天	5	≤3000	975	HCG	1	5	0	继发不孕	0.23	≤24	22.7	男方因素	2	5.16	648	0.16	2	10.54	3.14	48	4	3	6.3	A	ICSI	2	0	1	0	1	1	0	否	是	移植	未妊娠
499	0	2016100217	万冷冷	＜35	33	2	降调节方案	3	165.556	≤10天	9	≤3000	1490	HCG	12	0	0	原发不孕	2.27	≤24	21.1	男方因素	6	7.44	2492	1.22	7	7.38	3.08	44	1	9	11.3	A	ICSI	6	0	2	0	2	2	0	否	是	移植	未妊娠
1448	0	2016120077	杨翠	≥35	39	1	刺激方案	1	150	≤10天	7	≤3000	1050	HCG	2	3	1	继发不孕	1.39	≤24	22.8	女方因素	3	9.48	905	0.62	3	8.6	5.64	59.09	2	8	6.3	B-C	IVF	2	0	2	1	0	0	0	否	否	全胚冷冻
1949	0	C00009928	贾秀萍	≥35	38	4	刺激方案	1	150	≤10天	8	≤3000	1200	双扳机	2	2	1	继发不孕	0.91	≤24	21.3	女方因素	2	9.73	509	0.74	2	10.8	3.49	78	4	5	5.3	A-B	IVF	2	0	2	2	0	0	0	否	否	全胚冷冻
1186	0	2016040047	屈世宏	≥35	37	1	降调节方案	3	219.231	＞10天	13	≤3000	2850	HCG	2	1	0	继发不孕	1.93	≤24	19.8	女方因素	4	1.64	1120	0.99	4	10.09	4.6	59.09	2	6	11	A	IVF	3	0	2	1	2	2	0	否	是	移植	已妊娠	临床妊娠	宫内妊娠	单胎宫内妊娠
1089	0	2017030165	牛玉	≥35	37	1	降调节方案	3	288.462	＞10天	13	＞3000	3750	HCG	1	2	1	继发不孕	2.44	≤24	23.6	女方因素	4	2.29	1488	0.56	3	8.56	5.92	41.61	2	9	12.5	B	IVF	1	0	0	0	0	0	0	是		无可移植胚胎
1302	0	2017020077	张莉	＜35	34	2	刺激方案	1	262.5	≤10天	8	≤3000	2100	HCG	11	0	0	原发不孕	1.91	≤24	21.6	女方因素	3	1.06	773	0.66	2	5.15	4.55	59.09	1	8	11	A	IVF	1	0	1	0	1	1	0	否	是	移植	未妊娠
627	0	C00016882	马瑛骏	＜35	32	1	拮抗剂方案	2	200	≤10天	7	≤3000	1400	HCG	4	0	0	原发不孕	1.9	≤24	22.6	女方因素	6	0.58	1157	0.77	7	6.19	2.73	34	1	25	15.3	A	IVF	3	2	3	0	1	1	0	否	是	移植	已妊娠	临床妊娠	宫内妊娠	单胎宫内妊娠
1318	0	2018020093	韩露	＜35	26	2	降调节方案	3	150	≤10天	9	≤3000	1350	HCG	1	0	0	原发不孕	1.74	≤24	18.4	男方因素	3	1.04	711	0.55	6	9.63	4.4	34.56	1	20	12.5	A	ICSI	4	0	1	1	1	1	0	否	是	移植	已妊娠	临床妊娠	宫内妊娠	单胎宫内妊娠
829	0	C00005682	项庆玲	＜35	28	2	降调节方案	3	221.875	＞10天	12	≤3000	2662.5	HCG	3	0	0	原发不孕	1.96	≤24	19.9	女方因素	5	0.96	1439	0.2	9	5.72	6.38	64	1	11	13.5	A	IVF	7	0	2	0	2	2	0	否	是	移植	未妊娠
1776	0	C00012609	王慧	＜35	32	1	刺激方案	1	216.667	≤10天	9	≤3000	1950	HCG	6	1	0	继发不孕	1.5	≤24	23	女方因素	2	1.35	590	0.1	2	14.8	6.88	43.15	1	9	0.6	A	IVF	2	0	2	0	2	2	0	否	是	移植	未妊娠
342	0	2017050181	梁丽	＜35	26	1	降调节方案	3	256.818	＞10天	11	≤3000	2825	HCG	6	0	0	原发不孕	1.87	≤24	23.9	混合因素	7	6.57	1876	1.09	8	6.16	6.5	25	1	18	12.3	A	ICSI	3	0	2	0	0	0	0	否	否	全胚冷冻
2141	0	C00017286	刘金兰	≥35	42	1	拮抗剂方案	2	175	≤10天	6	≤3000	1050	双扳机	1	4	1	继发不孕	1.03	＞24	24.5	女方因素	1	6.67	386	0.55	1	6.7	3.69	27	4	7	7.5	A	IVF	1	0	1	0	0	0	0	否	否	全胚冷冻
327	0	2017030147	岳甜甜	＜35	29	1	降调节方案	3	262.5	＞10天	14	＞3000	3675	HCG	1	3	0	继发不孕	2.3	＞24	25.6	女方因素	7	2.19	2120	0.57	4	11.34	5.21	27	1	9	12.3	A	IVF	4	0	4	1	2	2	0	否	是	移植	已妊娠	临床妊娠	宫内妊娠	单胚胎停
1202	0	C00017336	刘蕾	＜35	34	1	拮抗剂方案	2	200	≤10天	8	≤3000	1600	HCG	1	3	1	继发不孕	2.83	＞24	25	女方因素	4	2.99	1043	0.6	6	5.99	3.46	22	1	12	7.7	A	IVF	3	0	3	1	0	0	0	否	否	全胚冷冻
2159	0	2017060304	杜红燕	≥35	43	1	刺激方案	1	150	≤10天	5	≤3000	750	HCG	1	3	1	原发不孕	0.06	＞24	24.8	女方因素	1	7.69	342	1.17	1	11.54	4.79	35.42	4	4	9.4		IVF	1	0	1	0	0	0	0	否	否	全胚冷冻
2198	0	C00005693	赵艳霞	≥35	39	6	刺激方案	1	285	≤10天	10	≤3000	2850	HCG	2	3	1	继发不孕	0.23	＞24	24.5	混合因素	1	34.52	268	1.2	0	12.66	4.35	73.77	4	1	10.5	A		0	0	0	0	0	0	0	是		未取到卵
1777	0	2018030237	郑秋玲	≥35	37	1	刺激方案	1	150	≤10天	8	≤3000	1200	HCG	8	3	1	继发不孕	2.46	＞24	26.7	女方因素	2	4.6	590	1.04	3	14.8	5.88	53	2	7	10	A	IVF	1	0	1	0	1	1	0	否	是	移植	未妊娠
222	0	2018060196	于永梅	≥35	39	5	降调节方案	3	152.941	＞10天	17	≤3000	2600	HCG	12	0	0	原发不孕	1.97	＞24	27.3	女方因素	8	1.36	1590	0.78	8	6.5	3.23	45.67	2	9	12.6	A	IVF	3	0	0	0	0	0	0	是		无可移植胚胎
91	0	2017080031	卢娜	＜35	27	1	降调节方案	3	218.75	＞10天	12	≤3000	2625	HCG	5	0	0	原发不孕	2.19	≤24	23.4	女方因素	9	5.9	2046	1.91	9	7.64	5.23	59.09	1	18	11.5	A	IVF	6	0	3	0	0	0	0	否	否	全胚冷冻
1114	0	2016100053	李祥敏	≥35	37	3	刺激方案	1	278.571	＞10天	14	＞3000	3900	HCG	1	1	1	继发不孕	2.26	≤24	20.2	女方因素	4	1.9	1392	1.1	3	5.04	2.14	59.09	2	9	8	B	IVF	1	0	1	0	0	0	0	否	否	全胚冷冻
772	0	C00011940	陈飞	≥35	35	1	拮抗剂方案	2	225	≤10天	8	≤3000	1800	HCG	6	0	0	原发不孕	2.49	≤24	18.3	女方因素	5	2.6	1796	0.82	6	9.89	2.99	76	2	10	1.3	A	IVF	5	0	4	0	2	2	0	否	是	移植	未妊娠
14	0	C00012665	刘聪聪	＜35	34	1	拮抗剂方案	2	272.917	＞10天	12	＞3000	3275	HCG	8	0	0	原发不孕	5.43	≤24	21	女方因素	10	3.41	2691	0.85	8	12.53	7.45	34	1	18	15.6	A-B	IVF	4	0	2	0	0	0	0	否	否	全胚冷冻
122	0	2016120068	靳倩	＜35	28	1	降调节方案	3	170.455	＞10天	11	≤3000	1875	HCG	1	0	0	原发不孕	1.78	≤24	19.5	女方因素	9	0.85	1168	0.63	9	8.14	5.44	49.09	1	19	#NULL!		IVF	9	0	4	0	2	2	0	否	是	移植	未妊娠
505	0	2018060011	贾宝利	＜35	25	1	拮抗剂方案	2	281.944	≤10天	9	≤3000	2537.5	双扳机	3	0	0	原发不孕	1.81	≤24	17.5	女方因素	6	1.09	2437	1.67	6	15.21	3.48	35	1	9	11.8	A	IVF	0	0	0	0	0	0	0	否	否	全胚冷冻
203	0	2017010065	周静	≥35	37	1	降调节方案	3	200	≤10天	9	≤3000	1800	HCG	1	1	1	继发不孕	2.79	≤24	22.3	女方因素	8	3.06	1877	1.63	7	7.57	6.09	44	2	12	18	A	IVF	5	0	2	1	2	2	0	否	是	移植	未妊娠
388	0	2017020098	窦方花	＜35	32	1	降调节方案	3	250	＞10天	12	≤3000	3000	HCG	9	1	0	继发不孕	2.49	＞24	26	女方因素	8	3.23	2621	2.09	8	7.4	4.04	46.43	1	11	13		IVF	7	0	6	4	0	0	0	否	否	全胚冷冻
1480	0	2018030089	刘彩	≥35	47	2	拮抗剂方案	2	281.25	≤10天	4	≤3000	1125	HCG	3	5	1	继发不孕	1.92	＞24	25	混合因素	3	2.01	862.71	0.7	4	7.57	4.44	60	2	8	10.1	B-C	ICSI	2	0	2	1	2	2	0	否	是	移植	未妊娠
1897	0	2017040183	耿雪	＜35	28	4	刺激方案	1	150	≤10天	9	≤3000	1350	HCG	3	0	0	原发不孕	0.89	≤24	19	女方因素	2	7.56	886	1.15	3	7.32	3.51	91	3	5	6.2	B	IVF	3	0	3	2	0	0	0	否	否	全胚冷冻
639	0	C00012644	李明娟	≥35	36	1	刺激方案	1	200	＞10天	12	≤3000	2400	HCG	8	2	1	继发不孕	1.69	＞24	34.3	女方因素	6	0.81	1161	0.56	4	5.8	3.7	18.86	2	11	1.1	A	IVF	0	1	1	0	0	0	0	否	否	全胚冷冻
2106	0	2016110164	任晓军	≥35	42	2	刺激方案	1	150	≤10天	6	≤3000	900	HCG	3	1	1	继发不孕	0.07	≤24	19.8	女方因素	1	7.35	458	0.42	2	16.6	4.37	88.08	4	2	10.8	A	IVF	0	0	0	0	0	0	0	是		无可移植胚胎
1300	0	2016070078	刘莹	＜35	28	3	刺激方案	1	225	≤10天	8	≤3000	1800	HCG	4	1	0	继发不孕	1.86	＞24	29.3	女方因素	3	5.23	779	0.69	3	6.8	4.89	51	1	6	13.5	A	IVF	2	0	1	1	0	0	0	否	否	全胚冷冻
1446	0	2017090084	邹静静	≥35	43	4	刺激方案	1	225	≤10天	8	≤3000	1800	HCG	3	3	1	继发不孕	0.18	≤24	22.1	女方因素	3	6.76	910	0.91	5	9.39	2.95	25.69	4	5	7.7	B	IVF	2	0	2	2	0	0	0	否	否	全胚冷冻
1745	0	2016080205	高红	≥35	42	1	刺激方案	1	225	≤10天	9	≤3000	2025	HCG	10	1	1	继发不孕	0.320	＞24	28.2	女方因素	2	15.5	636	0.28	1	8.94	5.63	56.43	4	5	4.5	B	IVF	0	0	0	0	0	0	0	是		无可移植胚胎
1050	0	2017090052	高守燕	≥35	39	1	刺激方案	1	272.727	＞10天	11	≤3000	3000	HCG	8	2	1	继发不孕	1.41	＞24	25	女方因素	4	6.66	1738	0.61	3	9.36	6.34	42	2	7	10.6	B	IVF	2	0	1	1	0	0	0	否	否	全胚冷冻
1992	0	C00016087	朱吉芳	≥35	45	2	拮抗剂方案	2	216.667	≤10天	9	≤3000	1950	HCG	2	1	0	继发不孕	0.66	＞24	25.4	混合因素	2	16.08	321	1.21	#NULL!	18.22	6.78	23	4	4	10.4	A		0	0	0	0	0	0	0	是		未取卵
2227	0	C00010547	王凤麟	≥35	46	3	刺激方案	1	225	≤10天	6	≤3000	1350	HCG	0	1	0	继发不孕	0.11	＞24	25.4	混合因素	1	47.56	170	0.45	0	11.73	4.71	50.5	4	3	9.7	B		0	0	0	0	0	0	0	是		未取到卵
239	0	2018010095	王志丽	≥35	38	1	降调节方案	3	200	＞10天	11	≤3000	2200	HCG	5	1	0	继发不孕	2.67	＞24	29.7	不明原因	8	0.83	1072	0.94	8	6.34	8.06	44	2	15	13.9	A	IVF	4	0	2	0	0	0	0	否	否	全胚冷冻
734	0	2017120025	田禹娴	＜35	31	1	降调节方案	3	237.5	≤10天	10	≤3000	2375	HCG	5	1	1	继发不孕	3.49	≤24	20.2	不明原因	5	2.35	1478	0.89	6	8.21	6.28	38	1	17	14.8	A-B	IVF	2	0	2	0	2	2	0	否	是	移植	已妊娠	临床妊娠	宫内妊娠	单胎宫内妊娠
860	0	C00003963	薛秀英	≥35	42	3	降调节方案	3	253.125	＞10天	12	＞3000	3037.5	HCG	4	6	1	继发不孕	1.26	≤24	21.8	男方因素	5	1.11	1255	0.91	5	9.67	7.23	43.67	2	8	11.2	A-B	ICSI	3	0	4	0	2	2	0	否	是	移植	未妊娠
660	0	2016120219	潘玉红	≥35	43	2	刺激方案	1	150	≤10天	10	≤3000	1500	HCG	1	2	1	继发不孕	2.02	＞24	27	男方因素	5	7.55	1458	1.88	4	5.3	3.2	21	2	7	7	B	ICSI	2	0	2	0	0	0	0	否	否	全胚冷冻
518	0	C00010993	李婷	≥35	42	1	降调节方案	3	225	≤10天	9	≤3000	2025	HCG	1	3	1	继发不孕	1.0	≤24	24	女方因素	6	4.65	2267	1.25	4	17.08	5.6	26	4	7	0.64	B	IVF	2	0	0	0	0	0	0	是		无可移植胚胎
823	0	2016120180	李国英	≥35	38	1	降调节方案	3	150	≤10天	10	≤3000	1500	HCG	3	0	0	继发不孕	2.32	≤24	22	女方因素	5	0.64	1470	1.53	7	8.25	2.73	29.09	2	13	8.7	B	IVF	3	0	3	1	2	2	0	否	是	移植	未妊娠
897	0	2017040076	王慧	＜35	29	1	降调节方案	3	150	≤10天	10	≤3000	1500	HCG	5	0	0	原发不孕	2.13	≤24	21.1	女方因素	5	2.63	1051	0.58	7	8.15	5.55	43.77	1	15	10.5	A	IVF	6	0	2	0	0	0	0	否	否	全胚冷冻
1923	0	C00015841	蔺爱	≥35	35	2	刺激方案	1	225	≤10天	8	≤3000	1800	HCG	3	3	1	继发不孕	1.26	≤24	18	女方因素	2	6.29	470	1.06	0	7.3	4.15	49.09	2	7	9.3	A-B		0	0	0	0	0	0	0	是		未取到卵
228	0	2016060102	丁莎	＜35	30	1	降调节方案	3	150	＞10天	12	≤3000	1800	HCG	3	0	0	原发不孕	3.2	≤24	22	女方因素	8	1.17	1416	0.97	7	9.13	5.06	65.69	1	10	10.4	A-B	IVF	5	0	4	2	2	2	0	否	是	移植	已妊娠	临床妊娠	宫内妊娠	单胎宫内妊娠
830	0	C00005387	周云霞	≥35	42	1	拮抗剂方案	2	211.364	＞10天	11	≤3000	2325	双扳机	2	4	1	继发不孕	1.51	≤24	22.3	混合因素	5	2.89	1437	0.62	5	7.11	5.25	45	2	8	8.7	A	ICSI	4	0	2	1	2	2	0	否	是	移植	未妊娠
155	0	2017060112	齐凤珍	≥35	38	1	降调节方案	3	243.75	＞10天	12	≤3000	2925	HCG	3	2	2	继发不孕	1.59	≤24	23.1	女方因素	8	1.36	1856	0.68	9	6.41	3.28	59.3	2	11	16.9	B	IVF	3	0	3	1	0	0	0	否	否	全胚冷冻
2038	0	C00015891	王玉珍	≥35	46	5	拮抗剂方案	2	182.143	≤10天	7	≤3000	1275	HCG	4	2	1	继发不孕	0.41	＞24	24.1	男方因素	1	13.31	679	0.83	1	19.67	7.26	33	4	6	5.6	B-C	ICSI	1	0	1	0	0	0	0	否	否	全胚冷冻
2173	0	2017120019	王海芳	≥35	46	4	刺激方案	1	150	≤10天	10	≤3000	1500	HCG	1	0	0	继发不孕	0.34	＞24	26.4	女方因素	1	2.27	316	0.37	1	13.33	4.59	79.69	4	7	8.6	B	IVF	1	0	1	0	0	0	0	否	否	全胚冷冻
2158	0	C00013223	齐妍飞	≥35	36	2	拮抗剂方案	2	150	≤10天	9	≤3000	1350	HCG	6	1	1	继发不孕	1.22	＞24	27	女方因素	1	8.64	348	0.21	2	10.66	4.45	38	2	6	1	A-B	IVF	1	0	2	1	2	2	0	否	是	移植	未妊娠
1000	0	2017060306	陈莉	≥35	41	1	拮抗剂方案	2	216.667	≤10天	9	≤3000	1950	HCG	6	3	0	继发不孕	1.64	≤24	23.4	女方因素	4	3.44	1275	0.86	3	9.26	5.59	43	2	9	9.6	A	IVF	2	0	2	1	0	0	0	否	否	全胚冷冻
2235	0	C00011051	李新文	＜35	30	1	刺激方案	1	150	≤10天	7	≤3000	1050	HCG	3	0	0	原发不孕	0.63	≤24	21.8	女方因素	1	19.49	359	1.48	2	11.62	4.58	71	3	6	0.89	B	IVF	0	0	0	0	0	0	0	是		未受精
1402	0	C00003648	田明秀	≥35	46	7	刺激方案	1	225	≤10天	5	≤3000	1125	HCG	4	2	1	继发不孕	0.51	≤24	22.8	男方因素	3	17.03	882	0.96	2	17.73	9.91	56.89	4	3	0.74	B-C	ICSI	2	0	1	0	0	0	0	否	否	全胚冷冻
579	0	C00017206	辛园园	＜35	34	1	拮抗剂方案	2	250	＞10天	13	＞3000	3250	HCG	1	0	0	原发不孕	2.1	≤24	17.5	女方因素	6	2.62	1648	0.61	6	13.4	6.5	26	1	9	13.4	A-B	IVF	2	0	1	0	1	1	0	否	是	移植	未妊娠
401	0	C00012466	安姗	＜35	33	1	拮抗剂方案	2	218.182	＞10天	11	≤3000	2400	HCG	4	0	0	原发不孕	2.92	≤24	23	女方因素	7	4.28	13.36	0.76	9	8.91	3.5	16	1	18	0.85	A	IVF	4	0	2	0	2	2	0	否	是	移植	未妊娠
944	0	C00018999	邵卫卫	≥35	39	2	拮抗剂方案	2	236.111	≤10天	9	≤3000	2125	HCG	1	4	1	继发不孕	2.1	≤24	22.9	男方因素	4	2.7	790.83	0.69	3	8.58	3.25	39	2	9	8.5	B	ICSI	1	0	1	0	1	1	0	否	是	移植	未妊娠
1385	0	2017110037	张彦芳	≥35	38	3	刺激方案	1	225	≤10天	8	≤3000	1800	HCG	3	2	0	继发不孕	0.56	≤24	23.3	女方因素	3	7.41	265	0.86	1	8.86	2.96	34.04	4	5	5.2	B	IVF	1	0	1	1	0	0	0	否	否	全胚冷冻
674	0	2017010044	石龙菊	＜35	26	1	降调节方案	3	262.5	＞10天	12	＞3000	3150	HCG	1	0	0	原发不孕	2.18	≤24	20.8	女方因素	5	2.48	1870	1.17	5	6.77	8.84	49	1	10	19.4	A-B	IVF	3	0	2	0	0	0	0	否	否	全胚冷冻
2241	0	C00011865	王玉珍	≥35	45	3	刺激方案	1	281.25	＞10天	12	＞3000	3375	HCG	3	2	1	继发不孕	0.93	＞24	24.1	女方因素	1	23.73	596	0.59	3	19.67	7.26	33	4	6	4.3	B	IVF	0	0	2	0	0	0	0	否	否	全胚冷冻
2223	0	C00017768	吴海丽	≥35	35	1	降调节方案	3	275	≤10天	9	≤3000	2475	HCG	1	2	2	继发不孕	1.4	＞24	28.3	混合因素	1	0.28	192.91	0.31	1	10.33	5.73	46.35	2	7	9.4	C	ICSI	1	0	1	0	1	1	0	否	是	移植	未妊娠
1489	0	2016030332	于江华	≥35	41	1	刺激方案	1	150	≤10天	7	≤3000	1050	HCG	2	1	1	继发不孕	1.67	≤24	22.4	男方因素	3	1.42	812	0.41	6	8.85	4.07	39.66	2	9	13.2	A-B	IVF	5	0	4	0	0	0	0	否	否	全胚冷冻
1799	0	C00011680	姜桂霞	≥35	44	2	刺激方案	1	225	≤10天	9	≤3000	2025	HCG	2	2	1	继发不孕	0.20	＞24	28.1	女方因素	2	14	541	0.26	2	13.13	3.84	93.36	4	4	0.53	B	IVF	0	0	0	0	0	0	0	是		无可移植胚胎
2216	0	2016030324	王纪伟	≥35	39	1	刺激方案	1	150	≤10天	7	≤3000	1050	HCG	5	1	0	继发不孕	0.66	≤24	23.8	混合因素	1	22.6	216	0.47	0	18.67	7.67	78.46	4	3	5.2	B		0	0	0	0	0	0	0	是		未取到卵
1011	0	2017090271	徐友芳	≥35	35	2	刺激方案	1	150	≤10天	9	≤3000	1350	HCG	2	3	1	继发不孕	1.73	≤24	21.4	女方因素	4	25.16	1230	1.23	5	5.97	2.87	49.09	2	6	6	A	IVF	2	0	2	0	0	0	0	否	否	全胚冷冻
946	0	2015110146	秦树红	≥35	47	2	刺激方案	1	180	≤10天	10	≤3000	1800	HCG	15	0	0	原发不孕	0.806	≤24	21.3	女方因素	4	5.27	735	0.65	2	10.69	5.54	13	4	3	13.5	A	IVF	2	0	1	1	0	0	0	否	否	全胚冷冻
1128	0	C00010800	孔娟	≥35	38	3	拮抗剂方案	2	150	≤10天	10	≤3000	1500	HCG	1	2	0	继发不孕	1.73	≤24	22	女方因素	4	4.43	1350	0.62	4	8.49	5.81	36.43	2	8	10.4	A	IVF	3	0	2	2	0	0	0	否	否	全胚冷冻
1159	0	C00004257	刘明雪	≥35	39	1	拮抗剂方案	2	225	≤10天	8	≤3000	1800	双扳机	5	3	1	继发不孕	0.92	＞24	26.7	女方因素	4	3.46	1230	0.53	3	14.08	6.07	91	4	7	10.4	A-B	IVF	2	0	2	1	0	0	0	否	否	全胚冷冻
9	0	C00012101	郭艳皊	＜35	24	1	刺激方案	1	105	＞10天	15	≤3000	1575	HCG	2	0	0	原发不孕	2.93	≤24	24	女方因素	10	6.79	2897	0.29	8	6.71	5.83	46.43	1	12	8	A-B	IVF	2	0	1	0	0	0	0	否	否	全胚冷冻
1681	0	C00006314	柳雅	≥35	41	1	刺激方案	1	245.455	＞10天	11	≤3000	2700	HCG	16	0	0	原发不孕	0.14	＞24	28.6	混合因素	2	7.58	793	0.11	1	8.94	3.45	32	4	4	7.2		ICSI	1	0	1	0	0	0	0	否	否	全胚冷冻
1355	0	2017090163	张丹	≥35	36	4	拮抗剂方案	2	214.286	＞10天	14	≤3000	3000	HCG	1	0	0	原发不孕	1.29	≤24	20.2	男方因素	3	25.43	563	0.57	1	5.07	4.84	53.76	2	6	8.8	B	ICSI	1	0	0	0	0	0	0	是		无可移植胚胎
614	0	2017070025	刘成丽	≥35	35	1	降调节方案	3	210	≤10天	10	≤3000	2100	HCG	5	1	0	原发不孕	1.25	＞24	26.5	女方因素	6	0.53	1339	1	6	7.91	3.29	35.42	2	10	11	A	IVF	5	0	4	3	2	2	0	否	是	移植	已妊娠	临床妊娠	宫内妊娠	单胚胎停
253	0	C00015950	周升花	≥35	50	4	拮抗剂方案	2	238.889	≤10天	9	≤3000	2150	HCG	4	2	1	继发不孕	0.38	≤24	23.3	女方因素	7	2.52	1556	1.33	5	6.47	2.78	49	4	4	11.9	B	IVF	3	0	2	1	2	2	0	否	是	移植	未妊娠
803	0	2017090068	曹薇	≥35	37	1	降调节方案	3	225	≤10天	9	≤3000	2025	HCG	3	2	1	继发不孕	1.53	＞24	24.7	混合因素	5	3.19	1610	0.84	6	8.96	3.67	25.7	2	18	12.3	A	ICSI	5	0	3	1	0	0	0	否	否	全胚冷冻
675	0	2016020019	王春莲	≥35	45	1	降调节方案	3	232.5	≤10天	10	≤3000	2325	HCG	1	4	1	继发不孕	0.62	＞24	24.9	女方因素	5	8.32	1863	0.81	5	11.54	5.71	53.77	4	7	11	A	IVF	2	0	2	2	2	2	0	否	是	移植	未妊娠
808	0	2016070042	张苗	≥35	36	3	降调节方案	3	281.25	＞10天	12	＞3000	3375	HCG	11	0	0	原发不孕	1.48	＞24	25.7	混合因素	5	2.58	1570	0.25	5	7.5	7.58	26	2	11	10.6	A	ICSI	4	0	4	2	2	2	0	否	是	移植	已妊娠	临床妊娠	宫内妊娠	单胎宫内妊娠
1101	0	C00015876	李开美	≥35	50	7	刺激方案	1	225	≤10天	8	≤3000	1800	HCG	9	3	3	继发不孕	0.31	≤24	21.5	女方因素	4	6.39	1444	0.78	3	10.92	4.31	55	4	6	5.8	B-C	IVF	0	0	0	0	0	0	0	是		无可移植胚胎
1894	0	2016080053	张新云	≥35	45	3	拮抗剂方案	2	139.286	≤10天	7	≤3000	975	HCG	2	5	1	继发不孕	0.67	＞24	26.2	女方因素	2	9.23	196	2.11	0	16.38	6.12	74.64	4	3	9.4	B		0	0	0	0	0	0	0	是		未取到卵
1938	0	2017040041	解明明	≥35	38	1	刺激方案	1	225	≤10天	7	≤3000	1575	HCG	3	0	0	原发不孕	1.23	＞24	24.9	女方因素	2	3.06	417	0.55	2	12.2	7.89	25.42	2	8	8.5	A	IVF	1	0	1	0	1	1	0	否	是	移植	已妊娠	临床妊娠	宫内妊娠	单胎宫内妊娠
18	0	2018040067	张利娟	＜35	31	1	降调节方案	3	272.727	＞10天	11	≤3000	3000	HCG	6	1	1	继发不孕	2.58	≤24	22.9	不明原因	10	1.34	2184	0.42	8	8.22	5.39	77.07	1	12	13.8	A	IVF	3	0	1	0	0	0	0	否	否	全胚冷冻
1044	0	C00014963	邱燕燕	≥35	39	1	降调节方案	3	280.208	＞10天	12	＞3000	3362.5	HCG	4	1	1	继发不孕	1.67	＞24	30	女方因素	4	3.91	1773	0.87	4	8.13	7.47	58	2	12	#NULL!		IVF	2	0	0	0	0	0	0	是		无可移植胚胎
1840	0	C00003520	张金玲	≥35	41	3	拮抗剂方案	2	246.429	≤10天	7	≤3000	1725	双扳机	2	2	1	继发不孕	1.22	≤24	21.5	女方因素	2	3.03	464	0.63	2	10.05	4.69	33.7	2	8	8	A-B	IVF	2	0	2	2	2	2	0	否	是	移植	未妊娠
1643	0	C00015715	杜君霞	＜35	33	1	刺激方案	1	202.5	≤10天	10	≤3000	2025	HCG	2	0	0	原发不孕	0.57	≤24	20	混合因素	2	15.87	883	2.98	0	13.63	3.59	17	3	5	#NULL!			0	0	0	0	0	0	0	是		未取到卵
2206	0	2016090175	刘莹	＜35	28	4	刺激方案	1	262.5	≤10天	4	≤3000	1050	HCG	4	1	0	继发不孕	0.91	＞24	29.3	女方因素	1	2.66	250	0.59	1	9.8	5.89	86.43	3	3	10	A	IVF	0	0	0	0	0	0	0	是		无可移植胚胎
2075	0	C00018221	宋华丽	≥35	37	2	拮抗剂方案	2	271.875	≤10天	8	≤3000	2175	双扳机	3	0	0	原发不孕	1.23	≤24	22.3	混合因素	1	2.24	544.45	0.18	1	9.36	6.72	38	2	8	10.5	B	ICSI	1	0	1	0	0	0	0	否	否	全胚冷冻
1218	0	C00017642	付学辉	≥35	43	2	拮抗剂方案	2	287.5	＞10天	12	＞3000	3450	HCG	2	3	0	继发不孕	1.28	≤24	19.4	女方因素	4	1.32	1130	1.12	4	14.08	6.62	46.7	2	8	7.3	A	IVF	3	0	2	1	2	2	0	否	是	移植	已妊娠	临床妊娠	宫内妊娠	单胎宫内妊娠
1833	0	C00003351	张俊荣	≥35	48	2	拮抗剂方案	2	235.714	≤10天	7	≤3000	1650	双扳机	3	1	1	继发不孕	0.5	＞24	25.4	男方因素	2	10.17	484	0.94	2	6.23	4.21	32	4	3	9.8	10.17	ICSI	2	0	2	0	2	2	0	否	是	移植	未妊娠
1869	0	C00013332	陈艳玲	≥35	45	2	拮抗剂方案	2	283.333	≤10天	9	≤3000	2550	HCG	1	1	0	继发不孕	0.41	≤24	23.4	男方因素	2	4.31	353	0.18	2	10.82	7.4	23	4	4	12.1	A-B	ICSI	1	0	2	1	2	2	0	否	是	移植	未妊娠
1146	0	2017070234	王海芳	≥35	46	2	刺激方案	1	165	≤10天	5	≤3000	825	HCG	1	0	0	继发不孕	0.18	＞24	26.4	女方因素	4	3.76	1294	0.57	3	7.61	6.98	70.1	4	7	9.7	A	IVF	1	0	0	0	0	0	0	是		无可移植胚胎
641	0	C00003517	李洋	＜35	29	1	降调节方案	3	172.5	≤10天	10	≤3000	1725	HCG	5	1	0	继发不孕	3.0	≤24	21.1	女方因素	5	1.22	950	1.96	5	6.87	3.43	52	1	12	9.8	A	IVF	2	0	2	0	2	2	0	否	是	移植	未妊娠
1852	0	2016110253	时新萃	≥35	46	1	刺激方案	1	266.667	≤10天	9	≤3000	2400	HCG	5	3	2	继发不孕	0.11	＞24	29.3	女方因素	2	2.95	417	1.17	1	19.26	3.49	99.09	4	2	8.9	A-B	IVF	1	0	1	0	0	0	0	否	否	全胚冷冻
94	0	2017060163	张贵霞	＜35	32	2	降调节方案	3	156.25	＞10天	12	≤3000	1875	HCG	2	1	1	继发不孕	1.49	≤24	21.8	女方因素	9	1.4	1955	0.84	7	5.44	6.6	55.05	1	15	14.9	A	IVF	5	0	2	0	2	2	0	否	是	移植	已妊娠	临床妊娠	宫内妊娠	双胎宫内妊娠
1308	0	2018070131	狄冉	≥35	42	3	拮抗剂方案	2	185.294	＞10天	17	＞3000	3150	HCG	2	3	1	继发不孕	1.48	＞24	26	男方因素	3	4.41	741	0.15	3	13.02	5.65	40	2	11	9.9	B	ICSI	2	0	0	0	0	0	0	是		无可移植胚胎
22	0	2016030017	田晓琼	＜35	32	1	降调节方案	3	240	＞10天	15	＞3000	3600	HCG	10	0	0	原发不孕	1.98	≤24	20.3	女方因素	10	0.88	1839	3.6	9	7.53	5.98	80.74	1	11	12.8	A	IVF	4	0	2	1	0	0	0	否	否	全胚冷冻
2077	0	2018050012	张俊荣	≥35	47	1	拮抗剂方案	2	200	≤10天	10	≤3000	2000	HCG	3	1	1	继发不孕	0.32	＞24	25.4	女方因素	1	33	533	1.72	2	6.23	4.21	32	4	3	8.5	B-C	IVF	0	0	0	0	0	0	0	是		无可移植胚胎
2099	0	2016050175	王静	≥35	43	1	降调节方案	3	200	＞10天	12	≤3000	2400	HCG	4	1	0	继发不孕	0.28	＞24	24.2	女方因素	1	7.07	467	0.83	1	21.65	5.46	80.74	4	3	9.7	A	IVF	0	0	0	0	0	0	0	是		未受精
770	0	C00013001	赵益芬	≥35	43	2	拮抗剂方案	2	279.545	＞10天	11	＞3000	3075	HCG	16	0	0	原发不孕	0.64	≤24	21.8	女方因素	5	3.25	1804	1.22	7	7.07	6.84	35	4	10	11	B	IVF	4	1	1	0	0	0	0	否	否	全胚冷冻
31	0	2017060097	王加花	≥35	38	1	降调节方案	3	252.5	≤10天	10	≤3000	2525	HCG	3	2	1	继发不孕	1.49	≤24	23.3	女方因素	9	2.28	1672	1.42	4	7.02	4.63	100.56	2	10	16.5	B	IVF	3	0	0	0	0	0	0	是		无可移植胚胎
691	0	C00003388	张金凤	≥35	41	1	拮抗剂方案	2	177.273	＞10天	11	≤3000	1950	HCG	3	3	1	继发不孕	1.5	＞24	25.6	女方因素	5	1.05	1760	0.94	6	6.81	4.67	79	2	10	6.3	A-B	IVF	5	0	0	0	0	0	0	是		无可移植胚胎
87	0	C00010683	杜卿	＜35	34	1	降调节方案	3	165	＞10天	15	≤3000	2475	HCG	5	0	0	原发不孕	1.88	≤24	23.7	女方因素	9	0.81	2120	0.95	8	7.2	6.37	34	1	24	7	A	IVF	5	0	2	0	0	0	0	否	否	全胚冷冻
139	0	2017110016	刘福银	＜35	33	1	降调节方案	3	150	≤10天	10	≤3000	1500	HCG	4	2	0	继发不孕	3.92	≤24	24	女方因素	8	3.12	2320	0.54	9	5.34	4.89	45	1	16	10.7	A-B	IVF	5	0	3	0	0	0	0	否	否	全胚冷冻
1861	0	C00006248	李慧	≥35	43	3	拮抗剂方案	2	187.5	≤10天	4	≤3000	750	双扳机	4	3	3	继发不孕	0.7	≤24	20.8	女方因素	2	4.53	376	0.49	1	9.57	3.05	44	4	4	7.9	A	IVF	1	0	1	0	0	0	0	否	否	全胚冷冻
1788	0	C00011114	徐艳丽	≥35	35	2	拮抗剂方案	2	150	≤10天	8	≤3000	1200	HCG	1	1	1	继发不孕	2.7	≤24	23.9	女方因素	2	3.22	567	0.28	2	7.41	3.24	23	2	9	12.5	A-B	IVF	1	0	2	0	1	1	0	否	是	移植	未妊娠
1962	0	2018070068	王洪英	≥35	40	1	刺激方案	1	287.5	＞10天	12	＞3000	3450	HCG	1	3	0	继发不孕	0.29	≤24	20.9	女方因素	2	9.44	480	1.68	2	15.68	4.25	62.42	4	4	5	A-B	IVF	2	0	1	0	0	0	0	否	否	全胚冷冻
2263	0	C00016642	王晴晴	＜35	34	3	拮抗剂方案	2	262.5	＞10天	22	＞3000	5775	双扳机	1	1	0	继发不孕	1.26	≤24	21.5	混合因素	1	7.57	326	0.68	0	3.95	4.86	66.43	1	8	#NULL!			0	0	0	0	0	0	0	是		未取到卵
57	0	C00016891	王慧杰	＜35	27	1	降调节方案	3	225	＞10天	11	≤3000	2475	HCG	3	0	0	原发不孕	1.87	≤24	18.4	女方因素	9	1.95	2811	1.14	9	5.47	6.4	17	1	17	11.5	A	IVF	2	0	1	0	1	1	0	否	是	移植	未妊娠
812	0	2018030074	槐琳琳	＜35	30	1	拮抗剂方案	2	215	≤10天	10	≤3000	2150	HCG	5	0	0	原发不孕	2.82	≤24	19.6	女方因素	5	4.66	1553	1.08	4	5.41	7.37	43.13	1	8	12.7	A	IVF	3	0	1	0	1	1	0	否	是	移植	未妊娠
246	0	C00017666	弭守莺	＜35	34	1	拮抗剂方案	2	225	＞10天	11	≤3000	2475	HCG	4	0	0	原发不孕	2.86	＞24	27.6	女方因素	7	4.74	1914	0.54	4	5.89	4.02	57	1	12	13.9	A-B	IVF	1	0	1	0	1	1	0	否	是	移植	未妊娠
1977	0	2017040146	王成芬	＜35	34	1	刺激方案	1	150	≤10天	7	≤3000	1050	HCG	7	0	0	原发不孕	2.08	≤24	20.4	女方因素	2	9.65	433	2.5	1	6.44	4.69	36	1	7	7.5	B	IVF	1	0	1	1	0	0	0	否	否	全胚冷冻
854	0	C00015837	任玉翠	≥35	42	2	拮抗剂方案	2	288.462	＞10天	13	＞3000	3750	HCG	4	2	1	继发不孕	0.92	＞24	27.6	女方因素	5	5.25	1291	0.93	3	12.93	3.65	38	4	7	13.4	B	IVF	1	0	1	0	1	1	0	否	是	移植	未妊娠
6	0	2017020209	刘宁宁	≥35	35	1	降调节方案	3	257.692	＞10天	13	＞3000	3350	HCG	2	3	1	继发不孕	2.17	≤24	23.4	女方因素	10	0.89	2237	1.48	9	7.14	4.12	31	2	10	11.7	A	IVF	7	0	2	0	2	2	0	否	是	移植	未妊娠
822	0	C00015497	王娟	≥35	41	1	拮抗剂方案	2	210	≤10天	10	≤3000	2100	HCG	3	1	1	继发不孕	1.9	≤24	19.5	男方因素	5	3.94	1478	1.04	4	7.01	3.71	50	2	9	9.7	A	IVF	2	1	3	2	2	2	0	否	是	移植	已妊娠	临床妊娠	宫内妊娠	单胚胎停
92	0	2016040218	刘晓迪	＜35	32	1	降调节方案	3	273.214	＞10天	14	＞3000	3825	HCG	4	0	0	原发不孕	1.86	≤24	23.7	不明原因	9	0.37	1998	1.29	8	8.01	4.73	40.1	1	17	13.5	A-B	IVF	3	0	1	0	1	1	0	否	是	移植	未妊娠
1153	0	2017070253	赵美玲	＜35	32	1	降调节方案	3	275	＞10天	12	＞3000	3300	HCG	9	1	0	继发不孕	1.6	≤24	17.4	女方因素	4	0.81	1246	1.01	4	9.36	2.56	37	1	11	12.2	A	IVF	4	0	3	0	2	2	0	否	是	移植	已妊娠	临床妊娠	宫内妊娠	单胎宫内妊娠
28	0	C00011900	刘如芳	≥35	37	2	降调节方案	3	240	≤10天	10	≤3000	2400	HCG	4	3	0	继发不孕	2.66	＞24	32	女方因素	9	0.8	1836	0.31	6	9.19	4.88	52	2	14	1.02	A	IVF	0	0	0	0	0	0	0	是		无可移植胚胎
2050	0	C00018188	林海燕	≥35	47	8	刺激方案	1	210	≤10天	10	≤3000	2100	HCG	20	1	0	继发不孕	0.67	＞24	28.2	女方因素	1	5.18	652.93	0.17	1	7.3	2.34	35	4	3	0.56	B	IVF	0	0	0	0	0	0	0	是		无可移植胚胎
107	0	2016020049	吴雪	＜35	34	1	降调节方案	3	281.25	＞10天	12	＞3000	3375	HCG	3	0	0	原发不孕	3.92	≤24	19.4	女方因素	9	0.35	1868	0.47	7	9.58	5.74	46.43	1	12	16.2	A	IVF	4	0	1	0	0	0	0	否	否	全胚冷冻
1166	0	2016120014	张吉玲	≥35	36	2	刺激方案	1	270	≤10天	10	≤3000	2700	HCG	1	4	1	继发不孕	0.54	＞24	25.7	女方因素	4	2.59	1198	0.72	4	5.23	2.51	42	4	5	8.1	B	IVF	2	0	1	0	0	0	0	否	否	全胚冷冻
1177	0	C00018791	张红雷	＜35	31	1	拮抗剂方案	2	225	＞10天	11	≤3000	2475	HCG	1	2	0	继发不孕	2.18	＞24	25.5	女方因素	4	5.29	1147.22	1.21	4	8.75	2.88	49	1	8	1.14	B	IVF	4	0	4	4	1	1	0	否	是	移植	未妊娠
224	0	2017110003	田媛	＜35	30	1	降调节方案	3	181.25	＞10天	12	≤3000	2175	HCG	2	0	0	原发不孕	2.08	≤24	23.3	不明原因	8	3.85	1556	1	7	7.98	4.51	24	1	20	9.5	A	IVF	2	0	1	0	1	1	0	否	是	移植	已妊娠	临床妊娠	宫内妊娠	单胎宫内妊娠
843	0	C00004829	胥小翠	＜35	34	1	降调节方案	3	258.824	＞10天	17	＞3000	4400	HCG	4	2	1	继发不孕	1.40	＞24	25	女方因素	5	1.79	1363	0.17	6	8.81	6.35	54	1	11	12	B-C	IVF	1	0	0	0	0	0	0	是		无可移植胚胎
1225	0	C00016748	于萍	＜35	34	1	降调节方案	3	283.333	≤10天	9	≤3000	2550	HCG	1	0	0	原发不孕	2.4	＞24	24.6	女方因素	3	3.95	974	0.85	3	11.9	4.52	44	1	12	13.9	A	IVF	2	0	2	0	0	0	0	否	否	全胚冷冻
341	0	C00010517	王谦	＜35	29	1	降调节方案	3	195	≤10天	10	≤3000	1950	HCG	1	0	0	原发不孕	2.78	＞24	24.1	女方因素	9	1.82	1916	1.01	8	5.84	6.64	32	1	23	1.03	A-B	IVF	6	0	6	3	2	2	0	否	是	移植	已妊娠	临床妊娠	宫外妊娠	异位妊娠
1980	0	2017100205	赵珂	≥35	37	2	刺激方案	1	225	≤10天	5	≤3000	1125	HCG	2	0	0	原发不孕	1.32	≤24	19.4	女方因素	2	14.08	417	0.87	4	8.93	7.8	38.08	2	8	6.9	B	IVF	2	0	1	0	0	0	0	否	否	全胚冷冻
2182	0	C00018489	金晓红	≥35	39	2	刺激方案	1	150	≤10天	7	≤3000	1050	HCG	1	2	2	继发不孕	0.43	＞24	29.4	女方因素	1	4.73	303.83	1.78	0	9.26	3.59	43	4	5	5.4	B-C		0	0	0	0	0	0	0	是		未取到卵
200	0	C00018851	王菲菲	≥35	36	1	降调节方案	3	248.077	＞10天	13	＞3000	3225	HCG	3	0	0	原发不孕	2.76	＞24	28.7	女方因素	5	1.24	867.39	0.78	7	6.52	3.31	34.75	2	13	11.1	A	IVF	6	0	5	2	0	0	0	否	否	全胚冷冻
1609	0	2018010149	冀萌	＜35	34	1	刺激方案	1	225	≤10天	7	≤3000	1575	HCG	1	0	0	原发不孕	1.7	＞24	24.2	男方因素	2	8.81	982	1.56	2	11.26	4.21	50	1	7	5	A	ICSI	1	0	1	0	0	0	0	否	否	全胚冷冻
945	0	C00018418	梁爽	＜35	32	2	降调节方案	3	273.214	＞10天	14	＞3000	3825	HCG	2	0	0	原发不孕	1.390	＞24	25.8	女方因素	4	9.07	743.71	0.82	3	7.24	3.82	25.4	1	11	11.4	A-B	IVF	1	0	1	0	1	1	0	否	是	移植	已妊娠	临床妊娠	宫内妊娠	单胎宫内妊娠
1397	0	2017010069	吴贵月	＜35	26	1	降调节方案	3	187.5	＞10天	14	≤3000	2625	HCG	3	0	0	原发不孕	1.07	＞24	28	女方因素	3	1.39	888	0.71	3	6.18	2.35	78.43	3	4	11.2	A-B	IVF	3	0	2	2	2	2	0	否	是	移植	已妊娠	临床妊娠	宫内妊娠	双胎宫内妊娠
1	0	2017030012	张花	＜35	25	2	降调节方案	3	141.667	＞10天	18	≤3000	2550	HCG	4	0	0	原发不孕	5.23	＞24	35.1	女方因素	10	1.17	582	0.26	4	3.32	6.21	50.5	1	55	9.3	A-B	IVF	1	0	1	1	1	1	0	否	是	移植	已妊娠	临床妊娠	宫内妊娠	单胎宫内妊娠
2119	0	C00007415	武文波	≥35	44	2	刺激方案	1	225	≤10天	6	≤3000	1350	HCG	1	5	0	继发不孕	0.20	≤24	22.7	男方因素	1	8.44	441	0.68	1	8.62	4.23	87.85	4	3	5.1	B	ICSI	1	0	1	1	0	0	0	否	否	全胚冷冻
89	0	C00007399	于春梅	≥35	36	1	降调节方案	3	212.5	＞10天	12	≤3000	2550	HCG	7	2	0	继发不孕	2.37	＞24	44	男方因素	9	1.1	2082	0.13	8	6.83	2.84	19	2	44	11	A-B	IVF	4	0	4	2	2	2	0	否	是	移植	已妊娠	临床妊娠	宫内妊娠	单胚胎停
602	0	C00004395	刘艳华	≥35	40	1	拮抗剂方案	2	168.75	≤10天	8	≤3000	1350	HCG	1	4	1	继发不孕	1.8	＞24	24.6	女方因素	6	3.46	1498	0.28	5	6.91	4.76	47	2	12	14.4	A-B	IVF	4	0	2	0	2	2	0	否	是	移植	已妊娠	临床妊娠	宫内妊娠	单胎宫内妊娠
739	0	2017100087	冯鑫安	＜35	34	1	降调节方案	3	225	＞10天	11	≤3000	2475	HCG	2	0	0	原发不孕	1.42	≤24	19	女方因素	5	2.05	1452	0.67	4	8.53	6.3	45.42	1	12	10.5	A	IVF	1	0	2	1	1	1	0	否	是	移植	未妊娠
512	0	C00012138	张凤娟	＜35	34	1	降调节方案	3	279.545	＞10天	11	＞3000	3075	HCG	3	4	2	继发不孕	1.23	≤24	22.3	女方因素	6	2.32	2338	0.86	5	6.72	3.5	35	1	20	12	A	IVF	3	0	1	0	0	0	0	否	否	全胚冷冻
706	0	C00004417	赵茹	＜35	27	1	降调节方案	3	218.182	＞10天	11	≤3000	2400	HCG	1	0	0	原发不孕	1.46	≤24	17.1	女方因素	5	1.57	1666	1.44	5	13.28	5.2	60	1	8	13.2	A	IVF	4	0	4	2	2	2	0	否	是	移植	未妊娠
479	0	2017080185	刘芳琼	≥35	41	3	刺激方案	1	225	≤10天	8	≤3000	1800	HCG	3	4	1	继发不孕	1.38	≤24	20.5	女方因素	6	19.96	1724	2.03	2	10.67	4.72	48.65	2	9	6.5	B	IVF	0	0	0	0	0	0	0	是		无可移植胚胎
260	0	C00008118	张启艳	≥35	42	3	降调节方案	3	247.5	≤10天	10	≤3000	2475	HCG	2	4	1	继发不孕	2.24	≤24	24	男方因素	7	0.46	1567	0.82	7	8.05	2.17	106.43	2	16	7.5	A	ICSI	3	0	3	0	2	2	0	否	是	移植	未妊娠
633	0	C00005672	徐瑞华	≥35	37	1	拮抗剂方案	2	272.727	＞10天	11	≤3000	3000	双扳机	12	0	0	原发不孕	2.48	≤24	21.4	女方因素	6	2.08	1041	0.71	5	12.09	4.62	55	2	8	12.1	A	IVF	0	0	0	0	0	0	0	是		无可移植胚胎
2074	0	C00007130	王欣	≥35	49	1	拮抗剂方案	2	187.5	≤10天	8	≤3000	1500	双扳机	6	2	1	继发不孕	0.27	＞24	26	混合因素	1	4.12	549	1.67	1	8.26	3.76	30	4	5	9.7	A	ICSI	0	0	0	0	0	0	0	是		无可移植胚胎
1182	0	2017060201	刘建梅	≥35	41	5	刺激方案	1	225	＞10天	11	≤3000	2475	HCG	5	1	1	继发不孕	1.8	＞24	29.7	混合因素	4	6.33	1125	1.15	4	6.75	3.49	35.42	2	10	6.8	B	ICSI	2	0	2	0	0	0	0	否	否	全胚冷冻
849	0	C00006373	韩艳青	＜35	30	2	刺激方案	1	225	≤10天	8	≤3000	1800	双扳机	3	0	0	原发不孕	2.69	＞24	25.3	女方因素	5	1.96	1320	0.63	5	8.98	7.66	62	1	9	10.2	A-B	IVF	3	0	3	1	0	0	0	否	否	全胚冷冻
134	0	2018030241	刘芬	＜35	30	1	降调节方案	3	206.25	＞10天	12	≤3000	2475	HCG	4	0	0	原发不孕	3.070	≤24	19.8	不明原因	8	1.69	1623	1.55	4	7.36	4.27	61	1	8	18.1	B	IVF	2	0	2	0	0	0	0	否	否	全胚冷冻
337	0	2017060087	郄慧芝	≥35	44	2	刺激方案	1	290	≤10天	5	≤3000	1450	HCG	2	1	1	继发不孕	1.28	≤24	23.4	女方因素	7	1.58	1976	0.5	6	6.85	4.23	59.86	2	10	10.4	B	IVF	2	0	2	1	2	2	0	否	是	移植	未妊娠
1082	0	2018020044	曹月红	＜35	31	1	刺激方案	1	150	≤10天	7	≤3000	1050	HCG	1	1	0	继发不孕	1.41	≤24	24	女方因素	4	7.85	1533	0.55	4	7.12	3.79	35	1	7	8.2	A	IVF	3	0	2	0	0	0	0	否	否	全胚冷冻
1354	0	2017030009	郝玉婷	≥35	37	2	降调节方案	3	231.818	＞10天	11	≤3000	2550	HCG	4	1	0	继发不孕	1.45	≤24	23.4	女方因素	3	7.62	567	0.56	2	8.36	4.34	66.61	2	11	11.1	A	IVF	1	0	0	0	0	0	0	是		无可移植胚胎
358	0	C00017455	吴晓燕	≥35	37	2	拮抗剂方案	2	225	≤10天	9	≤3000	2025	HCG	1	3	0	继发不孕	1.85	≤24	18.8	混合因素	7	3.1	1819	1.06	6	7.16	5.04	44	2	11	13.3	A	ICSI	4	0	4	1	0	0	0	否	否	全胚冷冻
1749	0	2018010009	何卫青	≥35	39	1	拮抗剂方案	2	225	≤10天	6	≤3000	1350	HCG	1	2	1	继发不孕	1.94	＞24	30.9	女方因素	2	1.95	632	0.38	4	4.35	2.86	41	2	9	8.8	A	IVF	2	0	2	1	2	2	0	否	是	移植	已妊娠	临床妊娠	宫内妊娠	单胎宫内妊娠
326	0	C00016964	程光玲	＜35	31	1	降调节方案	3	290	＞10天	15	＞3000	4350	HCG	6	1	0	继发不孕	1.62	≤24	21.9	女方因素	7	2.21	2121	0.43	4	9.77	6.99	35	1	12	14.9	A	IVF	2	0	1	1	1	1	0	否	是	移植	已妊娠	临床妊娠	宫内妊娠	单胎宫内妊娠
2094	0	2017060045	赫玉娥	≥35	45	1	刺激方案	1	131.25	≤10天	8	≤3000	1050	HCG	1	3	1	继发不孕	0.29	≤24	23.4	女方因素	1	20.48	484	0.46	#NULL!	8.81	3.29	38	4	3	11.2	A		0	0	0	0	0	0	0	是		未取卵
231	0	2016120118	肖叶	＜35	34	1	降调节方案	3	238.462	＞10天	13	＞3000	3100	HCG	3	1	0	继发不孕	1.33	≤24	18.5	女方因素	8	0.93	1354	0.56	9	7.43	4.67	73.4	1	11	14.7	A-B	IVF	6	0	3	1	0	0	0	否	否	全胚冷冻
1485	0	2017070225	宿萍	≥35	35	1	刺激方案	1	195	≤10天	10	≤3000	1950	HCG	5	0	0	原发不孕	2.54	≤24	22.9	女方因素	3	5.49	836.18	0.67	4	8.53	3.31	31	2	7	5.5	B	IVF	4	0	2	1	0	0	0	否	否	全胚冷冻
1454	0	C00016489	宋炜彤	≥35	46	6	刺激方案	1	150	≤10天	7	≤3000	1050	HCG	3	3	1	继发不孕	0.74	＞24	25.6	男方因素	3	11.27	895	1.07	3	17.09	5.42	41	4	6	6.5	C	ICSI	2	0	2	0	0	0	0	否	否	全胚冷冻
294	0	C00004423	张晨	＜35	34	1	降调节方案	3	216.667	≤10天	9	≤3000	1950	HCG	3	0	0	原发不孕	1.59	≤24	21.2	女方因素	7	2.3	2737	1.27	9	6.85	4.22	47	1	13	0.81	A	IVF	6	0	2	1	2	2	0	否	是	移植	未妊娠
1193	0	2017090227	杨秀华	≥35	41	1	降调节方案	3	250	≤10天	9	≤3000	2250	HCG	1	3	1	继发不孕	0.4	≤24	19.9	女方因素	4	3.15	1082	0.37	4	12.23	4.69	86.76	4	5	11.9	A-B	IVF	4	0	4	1	0	0	0	否	否	全胚冷冻
1623	0	C00007819	孟红霞	≥35	46	1	刺激方案	1	162.5	≤10天	6	≤3000	975	双扳机	1	3	1	继发不孕	0.93	≤24	22.1	混合因素	2	8.05	939	0.54	2	7.25	5.85	66	4	8	0.52	B	ICSI	2	0	2	0	0	0	0	否	否	全胚冷冻
364	0	2016110275	杨磊	≥35	37	1	降调节方案	3	242.308	＞10天	13	＞3000	3150	HCG	14	0	0	原发不孕	1.67	＞24	28	女方因素	7	1.23	1773	0.97	6	8.83	4.91	51.75	2	15	18.3	A-B	IVF	4	0	1	1	0	0	0	否	否	全胚冷冻
2178	0	C00005708	孔红霞	≥35	36	1	拮抗剂方案	2	180	≤10天	5	≤3000	900	双扳机	9	2	1	继发不孕	0.21	＞24	26	混合因素	1	3.24	308	0.28	1	9.3	2.98	41.75	4	5	9.4	A-B	ICSI	1	0	0	0	0	0	0	是		无可移植胚胎
561	0	2017030163	费文霞	＜35	29	1	降调节方案	3	141.667	≤10天	9	≤3000	1275	HCG	2	0	0	原发不孕	2.56	≤24	21.2	女方因素	6	0.4	1835	1.5	8	5.63	3.17	41.75	1	15	11.7	A-B	IVF	4	0	2	1	0	0	0	否	否	全胚冷冻
164	0	2018070103	刘霞	＜35	32	1	拮抗剂方案	2	188.393	＞10天	28	＞3000	5275	HCG	4	1	0	继发不孕	1.67	≤24	19.2	女方因素	8	0.31	2705	1.09	5	4.86	3.49	59.09	1	9	10.6	A	IVF	3	0	2	1	2	2	0	否	是	移植	未妊娠
2128	0	2017020137	江秀霞	≥35	41	2	刺激方案	1	267.857	＞10天	14	＞3000	3750	双扳机	1	4	1	继发不孕	0.78	≤24	22	女方因素	1	4.35	417	0.58	1	5.97	6.84	38.25	4	2	10.7	B	IVF	1	0	1	0	0	0	0	否	否	全胚冷冻
2070	0	C00011978	郝照华	≥35	43	2	拮抗剂方案	2	150	≤10天	9	≤3000	1350	HCG	3	0	0	原发不孕	0.78	≤24	21.5	混合因素	1	31.85	562	0.56	1	13	4.45	22	4	4	13	A-B	ICSI	0	0	0	0	0	0	0	是		无可移植胚胎
515	0	2017010098	宗军燕	≥35	39	1	刺激方案	1	225	≤10天	10	≤3000	2250	HCG	1	1	1	继发不孕	1.78	≤24	21.9	女方因素	6	1.72	2291	1.36	6	8.27	5.05	73.4	2	15	15.7	B	IVF	3	0	2	0	2	2	0	否	是	移植	未妊娠
1886	0	2016070061	李颖	＜35	33	1	拮抗剂方案	2	282.353	＞10天	17	＞3000	4800	HCG	1	2	1	继发不孕	1.94	＞24	24.2	男方因素	2	2.61	406	0.63	2	12.79	4.83	64	1	12	10.8	A	ICSI	2	0	2	0	0	0	0	否	否	全胚冷冻
1240	0	C00019145	王小娟	≥35	41	1	拮抗剂方案	2	282.692	＞10天	13	＞3000	3675	HCG	3	1	0	继发不孕	1.28	≤24	20.8	女方因素	3	2.37	934.88	0.71	3	8.02	4.5	46.65	2	8	10.4	A	IVF	1	0	0	0	0	0	0	是		无可移植胚胎
2278	0	2017100066	王玉萍	＜35	30	1	刺激方案	1	187.5	≤10天	8	≤3000	1500	HCG	4	0	0	原发不孕	0.95	≤24	21.6	女方因素	1	9.65	433	2.5	0	12.16	2.16	44	3	4	#NULL!			0	0	0	0	0	0	0	是		未取到卵
583	0	C00009722	张媛媛	≥35	35	1	拮抗剂方案	2	208.333	≤10天	9	≤3000	1875	HCG	2	0	0	继发不孕	1.51	≤24	23.4	女方因素	6	1.46	1621	0.78	6	7.14	3.95	43	2	9	12.1	A	IVF	4	0	2	0	2	2	0	否	是	移植	未妊娠
1633	0	C00006782	高洁	≥35	38	3	刺激方案	1	218.182	＞10天	11	≤3000	2400	HCG	3	2	0	继发不孕	1.18	＞24	25.8	女方因素	2	10.98	902	0.53	1	17.56	4.64	24	4	6	4.3	B	IVF	1	0	0	0	0	0	0	是		无可移植胚胎
1696	0	2017030075	张华敏	≥35	39	1	降调节方案	3	225	≤10天	8	≤3000	1800	HCG	2	0	0	继发不孕	0.39	≤24	20.9	女方因素	2	1.89	761	0.18	2	9.26	3.59	43	4	5	10.7	B	IVF	2	0	2	0	2	2	0	否	是	移植	已妊娠	临床妊娠	宫内妊娠	单胚胎停
978	0	2016060081	王发娜	＜35	34	3	刺激方案	1	285	≤10天	10	≤3000	2850	HCG	3	0	0	原发不孕	1.4	≤24	22.4	不明原因	4	13.03	1360	1.38	3	8.03	4.49	42.05	1	6	8.3	B	IVF	1	0	0	0	0	0	0	是		无可移植胚胎
1615	0	2016040125	孟凡芝	≥35	44	1	刺激方案	1	225	≤10天	7	≤3000	1575	HCG	4	2	1	继发不孕	0.33	＞24	24.9	混合因素	2	1.03	962	1	1	8.64	6.5	39	4	4	#NULL!	A	ICSI	1	0	1	1	0	0	0	否	否	全胚冷冻
171	0	C00014145	马召民	≥35	44	1	拮抗剂方案	2	286.364	＞10天	11	＞3000	3150	HCG	3	3	2	继发不孕	2.30	≤24	21.1	混合因素	8	2.72	2484	1.23	7	6.62	6.27	41.94	2	16	12.6	A	ICSI	2	0	2	0	2	2	0	否	是	移植	已妊娠	临床妊娠	宫内妊娠	单胎宫内妊娠
1808	0	C00007344	邢丽君	≥35	36	1	拮抗剂方案	2	150	≤10天	7	≤3000	1050	HCG	5	1	1	继发不孕	1.09	≤24	20.3	女方因素	2	7.35	532	0.56	2	8.88	6.83	63	4	4	11.7	A	IVF	2	0	1	0	1	1	0	否	是	移植	未妊娠
1467	0	2017030088	张艳	≥35	42	1	降调节方案	3	238.636	＞10天	11	≤3000	2625	HCG	3	2	1	继发不孕	0.09	＞24	24.6	女方因素	3	4.12	954	0.34	3	11.3	5.87	43.67	4	4	10.2	A	IVF	0	0	0	0	0	0	0	是		未受精
2197	0	C00011211	张迎秋	≥35	43	1	刺激方案	1	150	≤10天	5	≤3000	750	HCG	5	2	1	继发不孕	0.2	≤24	18.8	女方因素	1	6.89	269	1.12	1	18.56	6.6	20	4	3	7.3	A	IVF	1	0	1	0	1	1	0	否	是	移植	未妊娠
244	0	C00013283	许红	＜35	31	1	拮抗剂方案	2	202.5	≤10天	10	≤3000	2025	HCG	3	0	0	原发不孕	2.55	＞24	25.3	女方因素	7	2.2	1971	0.55	5	8.21	4.05	32	1	14	13.8	A	IVF	4	0	3	0	0	0	0	否	否	全胚冷冻
967	0	2017080091	孟令华	＜35	32	1	刺激方案	1	247.5	≤10天	10	≤3000	2475	HCG	4	2	1	继发不孕	2.89	≤24	21.7	女方因素	4	9.4	1392	0.8	6	8.45	3.81	56.76	1	11	7.8	B	IVF	3	0	2	2	0	0	0	否	否	全胚冷冻
976	0	2016090150	王茂云	≥35	40	2	降调节方案	3	265.385	＞10天	13	＞3000	3450	HCG	5	3	1	继发不孕	2.32	＞24	37.8	男方因素	4	1.74	1362	2.71	9	6.12	5.35	29	2	13	13.8	A	ICSI	2	0	1	0	1	1	0	否	是	移植	未妊娠
2114	0	2017120007	郭英霞	≥35	41	4	刺激方案	1	225	≤10天	8	≤3000	1800	HCG	1	2	1	继发不孕	1.24	＞24	30.8	女方因素	1	11.11	448	0.49	2	11.75	3.86	16	2	7	7.6	A	IVF	2	0	1	0	0	0	0	否	否	全胚冷冻
1588	0	2018010156	李翠玲	≥35	51	1	刺激方案	1	259.091	＞10天	11	≤3000	2850	HCG	2	3	1	原发不孕	0.66	＞24	24.2	女方因素	3	15.22	1032	2.24	2	13.65	8.45	29.6	4	2	7.2	A	IVF	1	0	1	0	0	0	0	否	否	全胚冷冻
1206	0	2018060129	昃青	≥35	36	1	降调节方案	3	200	≤10天	10	≤3000	2000	HCG	1	0	0	原发不孕	1.37	＞24	27.3	女方因素	4	1.63	1016	1.08	5	5.35	3.65	57	2	12	1.08	A	IVF	1	0	1	0	1	1	0	否	是	移植	已妊娠	临床妊娠	宫内妊娠	单胎宫内妊娠
1709	0	C00012868	胡静	≥35	39	3	拮抗剂方案	2	150	≤10天	8	≤3000	1200	HCG	1	2	1	继发不孕	0.19	≤24	21.3	混合因素	2	4.4	735	0.5	2	16.02	5.33	20	4	5	10.3	A	ICSI	2	0	1	0	1	2	0	否	是	移植	未妊娠
2207	0	C00006266	韩利君	≥35	36	2	刺激方案	1	231.818	＞10天	11	≤3000	2550	HCG	2	5	0	继发不孕	0.77	＞24	28.5	男方因素	1	32.41	245	0.4	0	15.34	9.37	50.34	4	3	7.4	B-C		0	0	0	0	0	0	0	是		未取到卵
1826	0	C00018955	楚晓莉	≥35	42	1	拮抗剂方案	2	175	≤10天	9	≤3000	1575	HCG	2	5	1	继发不孕	0.3	＞24	24.6	混合因素	2	11.99	499.54	0.69	1	18.87	7.94	27.93	4	4	12.8	A	ICSI	0	0	0	0	0	0	0	是		无可移植胚胎
444	0	2017060009	王淑华	≥35	45	1	刺激方案	1	225	≤10天	7	≤3000	1575	HCG	2	2	1	继发不孕	1.05	＞24	24.5	女方因素	6	8.85	1839	1.61	7	6.01	2.85	70	4	10	9.5	B	IVF	2	0	2	1	0	0	0	否	否	全胚冷冻
611	0	C00003462	王微微	≥35	36	1	降调节方案	3	275	＞10天	18	＞3000	4950	HCG	3	2	2	继发不孕	1.93	＞24	26.4	女方因素	6	2.6	1362	0.67	6	5.21	4.6	23.67	2	14	1.5	A-B	IVF	4	0	2	0	0	0	0	否	否	全胚冷冻
68	0	C00009520	陈紫	≥35	39	1	拮抗剂方案	2	172.5	＞10天	11	≤3000	1897.5	HCG	4	0	0	原发不孕	3.49	≤24	22.3	混合因素	9	2.82	2522	0.75	8	6.29	5.86	25	2	20	7.6	B	ICSI	5	0	3	0	0	0	0	否	否	全胚冷冻
399	0	2017030308	杨晶莎	＜35	27	1	降调节方案	3	257.143	＞10天	14	＞3000	3600	HCG	1	2	0	继发不孕	2.30	＞24	32.3	女方因素	7	1.28	1344	1.16	8	8.41	5.26	42	1	15	15.2	A-B	IVF	6	0	2	1	2	2	0	否	是	移植	未妊娠
699	0	2018040131	李贵玲	≥35	44	1	刺激方案	1	225	≤10天	7	≤3000	1575	HCG	2	7	2	继发不孕	1.29	≤24	21.8	女方因素	5	12.34	1692	1.02	5	8.16	8.7	27	2	10	5.3	A	IVF	3	0	2	0	0	0	0	否	否	全胚冷冻
1969	0	2016060028	曹红华	≥35	38	1	刺激方案	1	225	≤10天	9	≤3000	2025	HCG	2	3	1	继发不孕	0.17	≤24	21.8	女方因素	4	0.41	863	3.02	5	7.42	2.55	56.76	4	4	9	B-C	IVF	1	0	1	0	0	0	0	否	否	全胚冷冻
435	0	2016110177	王颖	≥35	43	1	刺激方案	1	150	≤10天	9	≤3000	1350	HCG	1	3	1	继发不孕	1.49	＞24	24.9	混合因素	6	10.6	838	0.96	6	8.16	8.76	53.77	2	9	5	A	ICSI	3	0	2	0	0	0	0	否	否	全胚冷冻
925	0	C00013032	王全英	≥35	42	1	拮抗剂方案	2	281.25	≤10天	8	≤3000	2250	HCG	1	1	1	继发不孕	0.44	＞24	28.2	女方因素	4	2.76	886	0.49	4	6.9	2.74	19.7	4	6	1.19	B	IVF	3	0	0	0	0	0	0	是		无可移植胚胎
1823	0	C00003571	伊爽	≥35	37	1	刺激方案	1	200	≤10天	6	≤3000	1200	HCG	3	0	0	原发不孕	1.05	＞24	24.6	混合因素	2	9.66	506	0.42	2	14.94	2.77	10	4	4	6.5	A	ICSI	2	0	2	1	0	0	0	否	否	全胚冷冻
1327	0	2017090136	李靖	＜35	27	2	刺激方案	1	206.25	≤10天	8	≤3000	1650	HCG	3	1	0	继发不孕	2.71	≤24	22.9	混合因素	3	7.55	664	1.18	3	10.03	4.32	15	1	7	5.6	A	ICSI	3	0	0	0	0	0	0	是		无可移植胚胎
2111	0	C00017379	刘养栓	≥35	49	4	刺激方案	1	150	≤10天	7	≤3000	1050	HCG	9	2	2	继发不孕	0.81	≤24	23.4	混合因素	1	14.77	452	0.63	#NULL!	7.44	2.68	33	4	5	10	A		0	0	0	0	0	0	0	是		未取卵
722	0	2017080198	孙芳	≥35	35	2	刺激方案	1	225	≤10天	7	≤3000	1575	HCG	3	1	1	继发不孕	1.28	≤24	23	女方因素	5	5.65	1561	0.89	5	8.38	4.84	43	2	12	11.2	A	IVF	3	0	2	0	0	0	0	否	否	全胚冷冻
1700	0	2016010148	颜世英	≥35	45	4	刺激方案	1	225	≤10天	7	≤3000	1575	HCG	2	1	1	继发不孕	0.87	≤24	22.5	女方因素	2	15.87	753	0.55	2	14.56	5.71	54	4	3	7.9	A-B	IVF	1	0	1	0	0	0	0	否	否	全胚冷冻
2069	0	C00011071	赵静	≥35	38	2	刺激方案	1	150	≤10天	5	≤3000	750	HCG	6	2	0	继发不孕	0.46	≤24	20.9	混合因素	1	14.45	569	1.19	1	11	4.88	75	4	3	3.8	B	ICSI	1	0	0	0	0	0	0	是		无可移植胚胎
678	0	2017100057	刘晓芳	≥35	35	1	刺激方案	1	150	≤10天	9	≤3000	1350	HCG	7	0	0	原发不孕	2.48	≤24	21.6	男方因素	5	13.31	1821	1.27	5	8.99	5.67	32.15	2	9	7.1	B	ICSI	3	0	2	1	0	0	0	否	否	全胚冷冻
1521	0	C00012793	包振华	＜35	33	1	拮抗剂方案	2	286.364	＞10天	11	＞3000	3150	HCG	5	3	0	继发不孕	1.53	≤24	20.7	女方因素	3	3.77	831	0.47	4	8.87	5.32	51	1	6	7	A	IVF	3	0	3	0	2	2	0	否	是	移植	未妊娠
864	0	C00004365	李凤娟	≥35	43	1	刺激方案	1	150	≤10天	7	≤3000	1050	HCG	2	0	0	原发不孕	0.39	≤24	22.1	女方因素	5	8.53	1237	1.38	3	9.77	3.51	32.76	4	6	12	B	IVF	2	0	2	1	0	0	0	否	否	全胚冷冻
1838	0	C00005298	田相云	≥35	45	3	刺激方案	1	250	≤10天	9	≤3000	2250	HCG	3	1	1	继发不孕	0.86	≤24	24	女方因素	2	7.46	469	0.78	3	7.34	4.08	51	4	5	0.76	B	IVF	1	0	1	1	0	0	0	否	否	全胚冷冻
2269	0	2017070220	张美	≥35	46	1	刺激方案	1	150	≤10天	8	≤3000	1200	HCG	2	5	1	继发不孕	0.14	＞24	27.3	混合因素	1	2.27	316	0.37	0	16.14	4.82	54	4	2	#NULL!			0	0	0	0	0	0	0	是		未取到卵
1048	0	2017100089	金同华	≥35	46	1	刺激方案	1	225	≤10天	10	≤3000	2250	HCG	1	3	2	继发不孕	1.43	＞24	26	女方因素	4	13.03	1749	0.41	5	8.38	4.84	43	2	11	4	A	IVF	2	0	2	1	0	0	0	否	否	全胚冷冻
2087	0	C00017320	刘齐齐	≥35	45	1	拮抗剂方案	2	150	≤10天	9	≤3000	1350	HCG	3	2	1	继发不孕	0.48	≤24	23.8	混合因素	1	16.56	495.35	0.3	#NULL!	14.75	3.38	37	4	3	13	B		0	0	0	0	0	0	0	是		未取卵
121	0	2017070228	任万凤	＜35	27	1	降调节方案	3	187.5	≤10天	10	≤3000	1875	HCG	2	0	0	原发不孕	2.53	＞24	27.3	女方因素	9	0.61	1094	1.59	9	4.8	6.46	93.36	1	20	9.4	B	IVF	6	0	0	0	0	0	0	是		无可移植胚胎
1613	0	C00010368	李永菊	≥35	47	2	刺激方案	1	266.667	≤10天	6	≤3000	1600	HCG	3	5	1	继发不孕	0.64	＞24	24.5	女方因素	2	4.51	979	0.37	2	18.67	4.51	97.9	4	3	8.5	A-B	IVF	1	0	1	0	0	0	0	否	否	全胚冷冻
1841	0	2017040012	任晓军	≥35	43	3	拮抗剂方案	2	150	≤10天	5	≤3000	750	HCG	3	1	1	继发不孕	0.07	≤24	19.8	女方因素	2	21.41	463	0.76	#NULL!	16.6	4.37	88.08	4	2	11.3	A		0	0	0	0	0	0	0	是		未取卵
552	0	2016030262	田媛	≥35	36	1	拮抗剂方案	2	246.429	≤10天	7	≤3000	1725	HCG	7	0	0	原发不孕	1.86	＞24	24.4	女方因素	6	3.11	1883	0.76	6	7.05	2.5	42.66	2	9	13.1	B	IVF	5	0	2	0	2	2	0	否	是	移植	未妊娠
1007	0	2017070126	苑纪昆	＜35	33	1	降调节方案	3	275	＞10天	12	＞3000	3300	HCG	4	0	0	原发不孕	1.34	≤24	19.7	女方因素	4	2.07	1244	1.08	4	7.77	4.87	35	1	12	12.4	A	IVF	3	0	0	0	0	0	0	是		无可移植胚胎
1986	0	C00012841	王剑非	≥35	44	2	刺激方案	1	278.571	≤10天	7	≤3000	1950	HCG	1	3	1	继发不孕	0.89	≤24	21.5	女方因素	2	18.15	383	0.5	2	7.49	3.74	45.67	4	7	7.5	B	IVF	1	0	0	0	0	0	0	是		无可移植胚胎
1118	0	C00018283	孙俊凡	≥35	37	1	拮抗剂方案	2	288.889	≤10天	9	≤3000	2600	HCG	2	2	0	继发不孕	1.9	≤24	22	女方因素	4	1.31	1388.07	0.89	4	8.2	3.08	37.07	2	11	6.4	A-B	IVF	2	0	1	0	0	0	0	否	否	全胚冷冻
301	0	2017120276	任万凤	＜35	27	2	拮抗剂方案	2	275	≤10天	5	≤3000	1375	双扳机	2	0	0	原发不孕	1.23	＞24	27.3	不明原因	7	1.22	2629	1.04	5	4.8	6.46	93.36	1	20	13	A	IVF	5	0	0	0	0	0	0	是		无可移植胚胎
1457	0	C00015492	宋炜彤	≥35	45	5	刺激方案	1	150	≤10天	9	≤3000	1350	HCG	3	3	1	继发不孕	0.22	＞24	25.6	男方因素	3	10.07	887	0.9	4	17.09	5.42	41	4	6	6.1	C	ICSI	1	0	2	0	0	0	0	否	否	全胚冷冻
2242	0	C00014805	张玉华	≥35	44	2	拮抗剂方案	2	262.5	≤10天	8	≤3000	2100	双扳机	3	3	1	继发不孕	0.12	＞24	26.8	女方因素	1	3.57	478	0.5	2	7.77	4.43	76.43	4	7	10.6	A	IVF	0	0	0	0	0	0	0	是		无可移植胚胎
726	0	C00016863	王晴晴	＜35	34	4	刺激方案	1	288.462	＞10天	13	＞3000	3750	HCG	1	1	0	继发不孕	2.18	≤24	21.5	女方因素	5	1.28	1545	0.87	4	3.95	4.86	66.43	1	8	14.8	B	IVF	3	0	2	0	0	0	0	否	否	全胚冷冻
2233	0	2017070146	姚冬梅	≥35	40	1	拮抗剂方案	2	150	≤10天	6	≤3000	900	HCG	15	0	0	原发不孕	0.41	≤24	19.8	女方因素	1	4.22	150	0.29	0	15.67	4.87	75.69	4	3	6.4	A		0	0	0	0	0	0	0	是		未取到卵
1806	0	C00004469	郑秋玲	≥35	37	2	刺激方案	1	150	＞10天	11	≤3000	1650	HCG	8	3	1	继发不孕	1.51	＞24	26.7	女方因素	2	17.2	532	2.09	#NULL!	14.8	5.88	23	2	7	12.8	A-B		0	0	0	0	0	0	0	是		未取卵
1211	0	C00012745	刘衍兰	≥35	38	3	刺激方案	1	195	≤10天	10	≤3000	1950	HCG	4	0	0	原发不孕	0.88	≤24	22.4	女方因素	4	1.69	1178	0.54	4	16.72	5.04	11	4	6	#NULL!		IVF	3	0	0	0	0	0	0	是		无可移植胚胎
819	0	2017080207	王传香	≥35	44	1	刺激方案	1	276.923	＞10天	13	＞3000	3600	HCG	6	2	1	继发不孕	0.32	≤24	24	女方因素	5	0.77	1503	0.34	7	10.7	5.13	66	4	9	10	A	IVF	4	0	1	0	1	1	0	否	是	移植	未妊娠
1314	0	C00005445	韩学艳	≥35	36	3	刺激方案	1	150	≤10天	7	≤3000	1050	HCG	2	0	0	原发不孕	1.62	≤24	23.8	男方因素	3	1.79	725	0.45	4	8.87	3.41	65.69	2	9	11.7	A	ICSI	2	0	0	0	2	2	0	否	是	移植	已妊娠	临床妊娠	宫内妊娠	单胎宫内妊娠
972	0	C00013208	潘来恩	＜35	28	1	刺激方案	1	225	≤10天	8	≤3000	1800	HCG	2	0	0	原发不孕	2.47	＞24	25.6	女方因素	4	2.14	1386	0.52	3	4.75	5.93	86.43	1	9	7.4	A-B	IVF	1	0	2	0	2	2	0	否	是	移植	未妊娠
1626	0	2016110081	崔兰玲	≥35	45	2	刺激方案	1	225	≤10天	9	≤3000	2025	HCG	1	2	1	继发不孕	0.21	＞24	24.2	混合因素	2	5.36	932	0.53	6	20.67	6.68	43	4	6	11.4	B-C	ICSI	4	0	2	1	0	0	0	否	否	全胚冷冻
2012	0	2016040255	郑伟	≥35	37	5	刺激方案	1	262.5	≤10天	8	≤3000	2100	HCG	4	0	0	原发不孕	0.65	≤24	22.2	混合因素	1	14.58	842	0.67	1	12.45	6.13	24	4	4	5.6	B	ICSI	1	0	1	0	0	0	0	否	否	全胚冷冻
2007	0	2017030005	刘世红	≥35	43	2	刺激方案	1	225	≤10天	10	≤3000	2250	HCG	3	1	1	继发不孕	0.65	＞24	30.8	女方因素	1	13.88	930	0.37	3	18.41	7.65	60	4	6	10.4	A	IVF	2	0	1	1	1	1	0	否	是	移植	已妊娠	临床妊娠	宫内妊娠	单胚胎停
2192	0	2017120143	李玉娥	≥35	46	2	刺激方案	1	150	≤10天	7	≤3000	1050	HCG	10	3	1	继发不孕	0.37	≤24	22.4	女方因素	1	2.02	277	0.76	1	15.06	5.96	59	4	3	9	A	IVF	1	0	1	0	0	0	0	否	否	全胚冷冻
250	0	2017020052	蒋茜玺	＜35	27	1	降调节方案	3	231.25	＞10天	12	≤3000	2775	HCG	2	0	0	原发不孕	2.91	≤24	20.7	女方因素	7	2.59	1774	0.51	4	14.52	3.66	44	1	15	17.1	A	IVF	4	0	0	0	0	0	0	是		无可移植胚胎
180	0	2017060039	杨冠敏	＜35	31	1	降调节方案	3	156.25	＞10天	12	≤3000	1875	HCG	4	0	0	原发不孕	2.77	≤24	21.8	女方因素	8	1.59	2307	0.81	8	6.34	8.06	44	1	12	13.2	A-B	IVF	7	0	4	1	2	2	0	否	是	移植	已妊娠	临床妊娠	宫内妊娠	双胎宫内妊娠
548	0	C00018277	王海云	≥35	45	1	降调节方案	3	288.462	＞10天	13	＞3000	3750	HCG	10	2	1	继发不孕	1.42	≤24	23.4	女方因素	7	0.91	1335.54	1.14	7	6.45	4.74	12	2	17	11.4	A	IVF	7	0	6	2	2	2	0	否	是	移植	未妊娠
1860	0	2016080098	燕国英	≥35	44	1	刺激方案	1	225	≤10天	8	≤3000	1800	HCG	1	4	1	继发不孕	0.19	≤24	22.5	女方因素	2	3.16	378	2.04	1	16.67	5.68	43	4	4	7.2	A	IVF	1	0	1	1	0	0	0	否	否	全胚冷冻
58	0	2018050160	裴俊荣	≥35	39	1	降调节方案	3	285	≤10天	10	≤3000	2850	HCG	1	2	2	继发不孕	1.41	≤24	20.4	女方因素	9	0.56	2800	1.98	7	10.5	4.61	65.76	2	11	12	A-B	IVF	5	0	4	0	0	0	0	否	否	全胚冷冻
1515	0	C00017891	高世芹	≥35	41	4	刺激方案	1	168.75	≤10天	8	≤3000	1350	HCG	4	1	0	继发不孕	0.29	≤24	21	混合因素	3	8.64	862.71	1.59	3	11.9	4.52	44	4	6	0.65	A	ICSI	3	0	2	0	0	0	0	否	否	全胚冷冻
1430	0	2017040217	王凤娟	＜35	33	1	刺激方案	1	225	＞10天	11	≤3000	2475	HCG	4	0	0	继发不孕	1.22	＞24	25.2	女方因素	3	3	959	0.95	2	7.13	5.74	93	1	8	12	A	IVF	1	0	1	0	1	1	0	否	是	移植	未妊娠
867	0	2016050022	张芳	＜35	29	1	降调节方案	3	245.455	＞10天	11	≤3000	2700	HCG	1	4	0	继发不孕	2.71	≤24	20.9	女方因素	5	0.37	1203	1.45	4	6.79	5.02	31.76	1	10	10.6	A	IVF	2	0	2	1	2	2	0	否	是	移植	已妊娠	临床妊娠	宫内妊娠	双胎宫内妊娠
167	0	2017040178	陈晓花	≥35	41	1	降调节方案	3	225	≤10天	10	≤3000	2250	HCG	2	1	1	继发不孕	2.43	＞24	26.2	女方因素	8	2.4	2640	1.67	6	9.76	4.96	69.5	2	13	14.1	A	IVF	4	0	2	0	0	0	0	否	否	全胚冷冻
1180	0	2016080052	赵洪燕	＜35	33	2	刺激方案	1	247.5	≤10天	10	≤3000	2475	HCG	4	1	1	继发不孕	0.23	＞24	24.8	混合因素	4	1.84	1129	0.93	2	7.47	2.26	84.41	3	3	9.9	B	ICSI	1	0	0	0	0	0	0	是		无可移植胚胎
1933	0	2016060141	宋焕焕	＜35	30	3	拮抗剂方案	2	225	≤10天	5	≤3000	1125	HCG	1	2	0	继发不孕	0.44	≤24	20.7	女方因素	2	17.55	435	0.47	2	9.76	5.22	80.74	3	5	14	A	IVF	2	0	2	1	2	2	0	否	是	移植	已妊娠	临床妊娠	宫内妊娠	单胚胎停
1873	0	2018060157	贾希菊	≥35	45	1	拮抗剂方案	2	262.5	＞10天	12	＞3000	3150	双扳机	1	2	2	继发不孕	0.95	＞24	30.1	女方因素	2	2.01	340	0.41	2	5.99	4.85	68	4	6	7.9	A	IVF	1	0	1	1	1	1	0	否	是	移植	已妊娠	临床妊娠	宫内妊娠	单胚胎停
1848	0	2017120167	陈红燕	≥35	45	1	刺激方案	1	158.333	≤10天	9	≤3000	1425	HCG	3	1	1	继发不孕	0.48	＞24	27.8	女方因素	2	4.23	435	0.18	1	10.08	4.93	34.76	4	11	10.8	A	IVF	1	0	1	0	1	1	0	否	是	移植	未妊娠
437	0	C00016241	张华	≥35	37	3	拮抗剂方案	2	200	≤10天	7	≤3000	1400	HCG	8	0	0	原发不孕	1.6	≤24	20	混合因素	6	10.89	736	0.76	5	9.41	6.01	89	2	11	#NULL!		ICSI	2	0	2	0	2	2	0	否	是	移植	未妊娠
1642	0	C00004255	杨宝凤	≥35	45	1	刺激方案	1	254.167	≤10天	9	≤3000	2287.5	HCG	3	2	1	继发不孕	0.52	≤24	23.6	女方因素	2	5.77	888	0.61	1	15.94	4.63	29	4	3	10.1	B	IVF	0	0	0	0	0	0	0	是		无可移植胚胎
668	0	2016110152	王福秀	≥35	41	1	降调节方案	3	225	≤10天	6	≤3000	1350	HCG	1	4	1	继发不孕	1.54	≤24	20.2	混合因素	5	10.11	1415	0.59	7	10.82	5.06	46.43	2	22	8.9	A	ICSI	3	0	4	0	2	2	0	否	是	移植	已妊娠	临床妊娠	宫内妊娠	单胚胎停
2244	0	2016010135	郑伟	≥35	37	4	刺激方案	1	234.375	＞10天	16	＞3000	3750	双扳机	5	0	0	原发不孕	0.47	≤24	22.2	混合因素	1	11.74	324	0.8	1	12.45	6.13	24	4	4	5.6	A	ICSI	1	0	1	0	0	0	0	否	否	全胚冷冻
705	0	2017060004	杨燕	＜35	32	1	刺激方案	1	283.333	≤10天	9	≤3000	2550	HCG	3	1	0	继发不孕	1.72	≤24	17.7	女方因素	5	11.49	1668.44	1.67	4	8.79	3.68	72	1	10	5.1	A	IVF	3	0	2	0	0	0	0	否	否	全胚冷冻
1062	0	2016040110	李芹	≥35	49	3	刺激方案	1	225	≤10天	7	≤3000	1575	HCG	9	4	1	继发不孕	0.48	＞24	24.2	女方因素	4	4.38	1643	0.33	3	17.78	4.26	45.42	4	4	7.2	A-B	IVF	3	0	2	0	0	0	0	否	否	全胚冷冻
683	0	2016080151	郝增凤	≥35	46	5	拮抗剂方案	2	150	≤10天	7	≤3000	1050	HCG	8	1	1	继发不孕	1.2	≤24	23.4	混合因素	5	2.4	1800	0.46	7	8.79	3.37	39.09	2	11	7.9		ICSI	5	0	4	3	0	0	0	否	否	全胚冷冻
936	0	C00015597	孙雪岩	＜35	31	1	拮抗剂方案	2	215.625	≤10天	8	≤3000	1725	HCG	3	0	0	原发不孕	1.49	≤24	24	女方因素	4	6.64	831	0.23	4	8.94	4.73	22	1	8	13.2	A-B	IVF	2	0	2	0	2	2	0	否	是	移植	未妊娠
679	0	C00010170	李雪娜	≥35	36	1	降调节方案	3	200	≤10天	9	≤3000	1800	HCG	5	0	0	原发不孕	1.96	＞24	25.3	女方因素	5	1.51	1817	0.91	7	7.18	2.81	40	2	11	8.1		IVF	5	0	2	0	2	2	0	否	是	移植	未妊娠
1570	0	C00011063	成海燕	≥35	42	2	刺激方案	1	225	≤10天	10	≤3000	2250	HCG	1	5	1	继发不孕	1.26	＞24	26.4	女方因素	3	8.33	1081	1.25	4	8.35	4.36	38	2	8	0.44	B	IVF	2	0	3	1	0	0	0	否	否	全胚冷冻
1786	0	2017050142	杨红霞	≥35	38	2	刺激方案	1	150	≤10天	7	≤3000	1050	HCG	2	1	1	继发不孕	0.44	＞24	26.6	女方因素	2	13.2	570	0.9	3	6.12	3.28	50.5	4	6	7	A-B	IVF	3	0	2	1	0	0	0	否	否	全胚冷冻
2179	0	2016120217	刘世红	≥35	43	1	刺激方案	1	206.25	≤10天	4	≤3000	825	HCG	3	1	1	继发不孕	0.45	＞24	30.8	女方因素	1	2.87	306	0.09	1	12.41	7.37	43.13	4	6	7	A	IVF	1	0	1	0	1	1	0	否	是	移植	未妊娠
1920	0	C00017669	谭焕娟	≥35	39	1	拮抗剂方案	2	275	≤10天	9	≤3000	2475	HCG	1	1	0	继发不孕	1.26	≤24	19.3	女方因素	2	5.84	480	1.28	4	12.64	5.97	84	2	8	11.7	A	IVF	4	0	1	0	0	0	0	否	否	全胚冷冻
1846	0	2018030083	王美华	≥35	43	1	刺激方案	1	286.364	＞10天	11	＞3000	3150	HCG	1	4	1	继发不孕	0.3	＞24	25.7	女方因素	2	7.89	439	1.92	2	17.93	7.27	69.11	4	4	6.6	A-B	IVF	1	0	1	0	0	0	0	否	否	全胚冷冻
1787	0	2017090021	孙猛猛	＜35	27	1	刺激方案	1	225	＞10天	16	＞3000	3600	双扳机	5	0	0	原发不孕	0.87	＞24	26.3	女方因素	2	12.96	569	1.07	1	8.99	3.27	47	3	5	8	B-C	IVF	2	0	2	0	0	0	0	否	否	全胚冷冻
2078	0	2017110291	王凤娟	＜35	33	2	刺激方案	1	181.25	＞10天	12	≤3000	2175	HCG	4	1	0	继发不孕	1.4	＞24	25.2	女方因素	1	3.59	525	0.72	1	7.13	5.74	93	1	8	11.7	A	IVF	1	0	1	0	0	0	0	否	否	全胚冷冻
184	0	2016020004	叶红	≥35	38	1	降调节方案	3	150	＞10天	12	≤3000	1800	HCG	2	4	1	继发不孕	2.58	＞24	31.6	女方因素	8	3.32	2255	0.61	7	6.98	3.16	46	2	12	14.2	A	IVF	6	0	2	1	2	2	0	否	是	移植	已妊娠	临床妊娠	宫内妊娠	单胎宫内妊娠
174	0	2018010081	韩倩倩	＜35	29	1	降调节方案	3	236.538	＞10天	13	＞3000	3075	HCG	3	0	0	原发不孕	2.91	≤24	17.4	混合因素	8	1.43	2396	1.78	4	6.44	4.69	29.6	1	12	10	A	ICSI	2	0	2	1	2	2	0	否	是	移植	未妊娠
2130	0	C00008580	肖熙越	＜35	32	1	拮抗剂方案	2	150	≤10天	9	≤3000	1350	双扳机	3	0	0	继发不孕	1.31	≤24	20.2	混合因素	1	20.05	415	0.43	#NULL!	13.67	3.2	26	1	12	8.2	A-B		0	0	0	0	0	0	0	是		未取卵
2229	0	2017030333	李梅	≥35	44	1	降调节方案	3	225	≤10天	6	≤3000	1350	HCG	3	0	0	继发不孕	0.77	＞24	28.4	女方因素	1	28.7	168	1.22	#NULL!	7.05	3.37	69	4	3	11.1	A		0	0	0	0	0	0	0	是		未取卵
1899	0	2016070102	周俊平	＜35	33	1	降调节方案	3	180	＞10天	15	≤3000	2700	HCG	10	0	0	原发不孕	0.58	＞24	25.7	女方因素	2	3.41	525	2.05	2	16.18	8.18	86.73	3	5	13.9	B	IVF	2	0	2	1	0	0	0	否	否	全胚冷冻
1168	0	C00008002	李焕苓	≥35	35	1	降调节方案	3	246.429	＞10天	14	＞3000	3450	HCG	5	1	1	继发不孕	1.80	≤24	22.6	女方因素	4	4.05	1194	0.53	4	8.41	5.26	42	2	7	1.69	A	IVF	2	0	2	0	0	0	0	否	否	全胚冷冻
1721	0	2016020160	支红燕	≥35	48	3	降调节方案	3	184.091	＞10天	11	≤3000	2025	HCG	1	5	1	继发不孕	0.19	≤24	21.2	混合因素	2	12.93	711	1.85	#NULL!	6.18	4.48	87	4	2	11.1	B		0	0	0	0	0	0	0	是		未取卵
113	0	C00006390	高淑娟	＜35	34	1	降调节方案	3	190.909	＞10天	11	≤3000	2100	HCG	1	3	1	继发不孕	2.72	≤24	23.7	女方因素	9	1.91	1704	0.37	9	7.21	3.33	26.18	1	14	11.4	A	IVF	5	1	1	0	1	0	1	否	是	移植	未妊娠
2211	0	C00009646	苏风杰	≥35	47	1	拮抗剂方案	2	150	≤10天	10	≤3000	1500	HCG	9	3	1	继发不孕	0.77	＞24	26.7	女方因素	1	7.72	239	1.36	1	13.41	3.85	10	4	3	1.37	A	IVF	0	0	0	0	0	0	0	是		无可移植胚胎
619	0	C00003722	张新敏	≥35	43	1	拮抗剂方案	2	257.692	＞10天	13	＞3000	3350	双扳机	2	4	1	继发不孕	1.69	≤24	24	女方因素	6	5.59	1310	0.59	5	9.72	4.31	20	2	8	14	A	IVF	3	0	2	2	2	2	0	否	是	移植	未妊娠
1890	0	C00019471	徐淑玲	≥35	45	2	拮抗剂方案	2	225	≤10天	8	≤3000	1800	HCG	1	4	3	继发不孕	0.33	＞24	26	女方因素	2	3.85	409.3	0.65	1	12.12	4.57	85	4	5	10.4	A	IVF	0	0	0	0	0	0	0	是		无可移植胚胎
883	0	C00008583	韩培培	≥35	40	1	降调节方案	3	192.105	＞10天	19	＞3000	3650	HCG	1	2	1	继发不孕	1.99	≤24	24	男方因素	5	2.19	1116	0.14	5	6.19	2.94	18	2	14	1.73	A-B	ICSI	3	0	1	0	0	0	0	否	否	全胚冷冻
1161	0	C00007038	毕春莲	≥35	43	2	拮抗剂方案	2	225	≤10天	7	≤3000	1575	HCG	2	2	1	继发不孕	2.66	≤24	21.5	女方因素	4	1.27	1221	0.12	6	10.59	5.44	13	2	9	6.5	B	IVF	5	0	2	1	2	2	0	否	是	移植	已妊娠	临床妊娠	宫内妊娠	单胚胎停
2219	0	C00007291	王翠连	≥35	43	2	拮抗剂方案	2	160.714	≤10天	7	≤3000	1125	双扳机	2	3	1	继发不孕	0.08	＞24	24.7	混合因素	1	3.26	206	0.15	1	18.54	8.51	57	4	2	7.8	B	ICSI	1	0	1	0	1	1	0	否	是	移植	已妊娠	临床妊娠	宫内妊娠	单胚胎停
1358	0	C00015531	赵亚萍	＜35	30	1	降调节方案	3	253.846	＞10天	13	＞3000	3300	HCG	1	3	0	继发不孕	1.42	≤24	22	女方因素	3	0.34	551	2.43	2	7.38	4.09	22	1	8	1.07	A	IVF	1	1	1	0	0	0	0	否	否	全胚冷冻
418	0	C00012846	赵贤梅	≥35	41	1	拮抗剂方案	2	285	≤10天	10	≤3000	2850	双扳机	2	3	1	继发不孕	1.45	＞24	28.6	女方因素	7	1.55	1102	2.33	8	9.37	4.32	48	2	10	0.88	B	IVF	5	0	4	1	0	0	0	否	否	全胚冷冻
582	0	2016040127	李晓燕	＜35	34	1	刺激方案	1	150	≤10天	7	≤3000	1050	HCG	6	1	0	继发不孕	1.81	≤24	17.7	不明原因	6	1.61	1626	0.92	6	6.48	4.55	30.1	1	11	9.7	A	IVF	3	0	2	0	2	2	0	否	是	移植	未妊娠
1680	0	C00018665	孙俊凡	≥35	37	2	拮抗剂方案	2	281.25	≤10天	8	≤3000	2250	HCG	2	2	0	继发不孕	1.44	≤24	22	男方因素	2	1.16	794.03	0.6	3	8.2	3.08	37.07	2	11	3.7	B	ICSI	0	0	0	0	0	0	0	是		无可移植胚胎
1539	0	2016040294	张红霞	≥35	47	1	刺激方案	1	231.25	＞10天	12	≤3000	2775	HCG	3	3	1	继发不孕	0.32	＞24	25.3	女方因素	3	1.3	1186	0.44	1	14.22	4.69	99.09	4	3	12.6	A	IVF	1	0	1	0	1	1	0	否	是	移植	未妊娠
305	0	C00007633	国洪梅	＜35	31	1	降调节方案	3	225	≤10天	10	≤3000	2250	HCG	6	1	0	继发不孕	2.81	≤24	20	女方因素	7	1.15	2430	0.66	8	8.2	3.06	41	1	16	10.1	A	IVF	6	0	3	0	2	2	0	否	是	移植	已妊娠	临床妊娠	宫内妊娠	单胎宫内妊娠
1144	0	2016050055	纪洪秀	≥35	40	1	降调节方案	3	244.231	＞10天	13	＞3000	3175	HCG	5	2	2	继发不孕	1.26	≤24	23.3	女方因素	4	0.61	1298	0.61	5	10.14	8.11	84.41	2	9	17.3	A	IVF	4	0	4	3	2	2	0	否	是	移植	未妊娠
186	0	2016040104	王萍	＜35	28	1	降调节方案	3	150	＞10天	13	≤3000	1950	HCG	5	0	0	原发不孕	4.49	＞24	29.3	女方因素	8	2.63	2220	1.01	7	6.15	4.18	26	1	62	9.2	A	IVF	4	0	4	2	2	2	0	否	是	移植	已妊娠	临床妊娠	宫内妊娠	单胚胎停
295	0	2017070003	孙萍萍	＜35	33	2	刺激方案	1	225	≤10天	8	≤3000	1800	HCG	2	0	0	原发不孕	3.89	≤24	18.3	女方因素	7	7.72	2709	1.95	7	8.67	3.88	76.43	1	11	6.1	B	IVF	4	0	3	2	0	0	0	否	否	全胚冷冻
1547	0	C00015504	邓秀芝	≥35	42	1	拮抗剂方案	2	225	≤10天	8	≤3000	1800	HCG	1	3	1	继发不孕	1.38	≤24	21.5	女方因素	3	4.58	1165	1.09	4	10.63	4.98	76.43	2	8	1.14	A-B	IVF	1	0	2	0	2	2	0	否	是	移植	未妊娠
813	0	2016100051	燕国英	≥35	44	2	刺激方案	1	283.333	≤10天	9	≤3000	2550	HCG	1	4	1	继发不孕	0.55	≤24	22.5	女方因素	5	1.43	1548	1.56	6	9.92	3.71	39.5	4	7	9.1	A	IVF	6	0	4	0	0	0	0	否	否	全胚冷冻
646	0	2018010153	孙灵仙	≥35	42	1	降调节方案	3	200	＞10天	11	≤3000	2200	HCG	1	3	1	继发不孕	1.87	＞24	24.4	女方因素	6	2.48	1558	0.64	7	10.47	2.65	31	2	9	12.5	A-B	IVF	6	0	6	2	2	2	0	否	是	移植	未妊娠
1691	0	2017090208	江秀霞	≥35	42	4	刺激方案	1	241.667	＞10天	12	≤3000	2900	HCG	1	4	1	继发不孕	0.39	≤24	22	混合因素	2	11.75	771	0.54	0	5.97	6.84	38.25	4	3	7.4	B		0	0	0	0	0	0	0	是		未取到卵
1297	0	C00009528	于鹏	＜35	33	1	刺激方案	1	202.5	≤10天	10	≤3000	2025	双扳机	4	0	0	原发不孕	1.2	＞24	24.4	混合因素	3	16.28	781	1.28	2	14.94	7.12	40	1	6	8.2	A	ICSI	1	0	1	0	0	0	0	否	否	全胚冷冻
926	0	2018060248	韩丽萍	≥35	46	4	拮抗剂方案	2	281.818	＞10天	11	＞3000	3100	HCG	16	0	0	原发不孕	0.95	＞24	26	混合因素	4	4.85	885	0.63	3	6.37	6.35	26	4	6	8.5	A	ICSI	2	0	2	2	0	0	0	否	否	全胚冷冻
793	0	C00018989	徐秀云	＜35	26	1	刺激方案	1	243.75	≤10天	8	≤3000	1950	HCG	6	0	0	原发不孕	1.23	＞24	24.4	女方因素	5	2.39	1668.44	1.29	5	8.22	4.1	46.67	1	6	10.6	C	IVF	3	1	3	2	0	0	0	否	否	全胚冷冻
1614	0	2017080061	胡芳	＜35	31	1	刺激方案	1	204.545	＞10天	11	≤3000	2250	HCG	2	0	0	原发不孕	2.55	＞24	29.6	女方因素	2	7.24	971	0.71	5	10.89	4.43	21	1	6	9.2	B	IVF	4	0	2	0	0	0	0	否	否	全胚冷冻
782	0	C00003804	戚相华	≥35	43	1	拮抗剂方案	2	268.75	＞10天	12	＞3000	3225	双扳机	1	2	2	继发不孕	0.5	＞24	25.4	女方因素	5	2.86	1736	0.54	4	15.05	5.07	46.81	4	5	11.3	A-B	IVF	2	0	2	0	0	0	0	否	否	全胚冷冻
2019	0	2018050052	张小平	≥35	44	1	刺激方案	1	150	≤10天	10	≤3000	1500	HCG	2	3	1	继发不孕	0.32	≤24	20	女方因素	1	11.83	774	1.03	2	18.08	4.65	78.43	4	4	6.2	B	IVF	1	0	1	1	0	0	0	否	否	全胚冷冻
384	0	2017020093	张建春	≥35	39	1	降调节方案	3	183.333	≤10天	9	≤3000	1650	HCG	2	1	0	继发不孕	1.53	≤24	21	女方因素	7	3.7	1579	0.14	8	7.42	3.72	65.69	2	10	13.2	A-B	IVF	4	0	3	1	1	1	0	否	是	移植	已妊娠	临床妊娠	宫内妊娠	单胎宫内妊娠
2194	0	2018010125	沈江玲	≥35	46	1	拮抗剂方案	2	171.429	＞10天	14	≤3000	2400	双扳机	3	2	1	继发不孕	0.36	≤24	19.5	女方因素	1	25.58	273	1.05	#NULL!	19.61	6.55	78.46	4	2	9.6	A		0	0	0	0	0	0	0	是		未取卵
839	0	2017090034	张馨元	≥35	39	1	拮抗剂方案	2	250	＞10天	15	＞3000	3750	HCG	1	1	1	继发不孕	1.1	≤24	24	混合因素	5	1.04	1398	1.2	4	7.57	6.01	26	4	6	13.6	B	ICSI	1	0	1	0	0	0	0	否	否	全胚冷冻
1259	0	C00018917	蔡秀群	≥35	39	2	拮抗剂方案	2	231.818	＞10天	11	≤3000	2550	HCG	1	2	2	继发不孕	1.41	＞24	25.6	女方因素	3	1.79	891.83	0.54	3	6.99	2.92	33	2	12	12	A	IVF	3	0	1	0	1	1	0	否	是	移植	未妊娠
2232	0	C00004486	王美蓉	≥35	39	1	拮抗剂方案	2	167.647	＞10天	17	≤3000	2850	HCG	3	0	0	原发不孕	0.66	≤24	23.4	女方因素	1	43.03	156	1.2	0	18.02	9.25	56	4	2	10.1	A		0	0	0	0	0	0	0	是		未取到卵
1883	0	C00013026	郭振花	≥35	37	1	刺激方案	1	200	≤10天	6	≤3000	1200	HCG	5	1	1	继发不孕	1.13	≤24	19.8	男方因素	2	19.88	248	1.17	#NULL!	7.14	3.22	39	4	4	1.09	A		0	0	0	0	0	0	0	是		未取卵
1425	0	2017110083	江延珍	＜35	34	1	降调节方案	3	143.75	＞10天	12	≤3000	1725	HCG	2	2	0	继发不孕	1.36	＞24	26.7	女方因素	5	1.62	1455	0.68	7	5.07	2.32	39	1	15	10.8	B	IVF	7	0	7	5	2	2	0	否	是	移植	未妊娠
497	0	2017020158	李秀粉	≥35	40	2	刺激方案	1	150	≤10天	8	≤3000	1200	HCG	2	3	1	继发不孕	0.48	≤24	23.3	女方因素	6	10.73	2500	0.69	6	6.12	4.31	36	4	7	7.7	A	IVF	4	0	3	0	0	0	0	否	否	全胚冷冻
451	0	2017010115	JANG SANGYOON	＜35	30	2	降调节方案	3	272.727	＞10天	11	≤3000	3000	HCG	1	0	0	原发不孕	1.26	≤24	20.4	男方因素	6	2.03	1791	0.72	9	5.64	4.67	86.43	1	10	13.3	A-B	ICSI	3	0	3	0	0	0	0	否	否	全胚冷冻
986	0	2017060275	王美荣	≥35	43	1	拮抗剂方案	2	203.125	≤10天	8	≤3000	1625	HCG	2	2	2	继发不孕	1.54	≤24	22.3	女方因素	4	3	1335	0.48	9	7.54	3.78	59.86	2	9	16.3	A	IVF	4	0	2	0	0	0	0	否	否	全胚冷冻
2217	0	2017030161	殷炜炜	≥35	37	1	刺激方案	1	159.375	≤10天	8	≤3000	1275	HCG	4	1	1	继发不孕	0.89	≤24	23	女方因素	1	5.51	209	0.23	0	6.87	2.9	45.98	4	5	12.1	A		0	0	0	0	0	0	0	是		未取到卵
1646	0	2017030321	左云芳	≥35	46	5	刺激方案	1	279.545	＞10天	11	＞3000	3075	HCG	1	3	1	继发不孕	0.55	≤24	22.1	混合因素	2	1.44	87	1.1	0	19.78	6.22	40.37	4	2	6			0	0	0	0	0	0	0	是		未取到卵
1244	0	2018030022	吴青侠	≥35	49	1	拮抗剂方案	2	177.273	＞10天	11	≤3000	1950	HCG	1	2	2	继发不孕	0.56	＞24	26.2	女方因素	3	2.56	926	0.53	2	12.17	4.84	96.43	4	4	12.1	A	IVF	0	0	0	0	0	0	0	是		无可移植胚胎
1530	0	C00016173	杨俊玲	≥35	40	1	拮抗剂方案	2	281.25	≤10天	8	≤3000	2250	HCG	8	2	0	继发不孕	0.28	≤24	20.9	女方因素	3	3.18	1237	1.03	3	8.08	3.57	26.43	4	5	12.6	A	IVF	3	0	2	1	2	2	0	否	是	移植	已妊娠	临床妊娠	宫外妊娠	异位妊娠
748	0	C00012980	铉磊	＜35	23	1	刺激方案	1	225	≤10天	8	≤3000	1800	HCG	2	0	0	继发不孕	1.68	≤24	23.4	男方因素	5	0.56	1405	0.36	3	7.03	4.51	45	1	11	0.83	A	ICSI	2	0	1	1	1	1	0	否	是	移植	未妊娠
454	0	2018010182	赵艳芳	≥35	36	1	降调节方案	3	218.182	＞10天	11	≤3000	2400	HCG	3	1	1	继发不孕	1.79	≤24	22.9	男方因素	6	1.9	1761	0.73	5	7.06	4.95	45.08	2	12	12.5	A	IVF	1	0	1	0	1	1	0	否	是	移植	未妊娠
645	0	C00018845	董丽燕	≥35	39	2	拮抗剂方案	2	225	≤10天	8	≤3000	1800	HCG	3	5	1	继发不孕	1.84	＞24	26.4	女方因素	5	2.22	881.53	0.82	5	8.95	3.62	10.81	2	9	9.5	B	IVF	4	2	2	2	0	0	0	否	否	全胚冷冻
2236	0	C00003801	李花平	≥35	42	1	降调节方案	3	278.571	≤10天	7	≤3000	1950	HCG	4	1	1	继发不孕	0.7	≤24	21.4	女方因素	1	16	314	1.14	2	12.56	4.04	88	4	5	0.61	B	IVF	0	0	0	0	0	0	0	是		无可移植胚胎
1501	0	C00018822	薛岸欣	≥35	46	3	刺激方案	1	150	≤10天	8	≤3000	1200	HCG	2	1	0	继发不孕	0.63	≤24	21.5	女方因素	3	3.81	955	0.94	3	17.05	5.4	97.66	4	5	8.6	B	IVF	3	0	3	2	0	0	0	否	否	全胚冷冻
214	0	2016120169	唐圆圆	＜35	32	3	降调节方案	3	155	≤10天	10	≤3000	1550	HCG	1	1	0	继发不孕	2.36	≤24	17.7	男方因素	8	0.77	1712	0.97	4	6.87	3.5	77	1	15	12.7	A	ICSI	3	0	0	0	0	0	0	是		无可移植胚胎
372	0	C00006388	闫正芳	≥35	43	1	降调节方案	3	214.286	＞10天	14	≤3000	3000	HCG	3	3	1	继发不孕	1.41	≤24	24	女方因素	7	1.09	1671	0.87	7	11.11	4.45	10	2	12	1.17	A	IVF	3	0	2	1	2	2	0	否	是	移植	未妊娠
362	0	C00003435	邱发溪	≥35	37	3	刺激方案	1	265.909	＞10天	11	≤3000	2925	HCG	1	3	1	继发不孕	1.3	≤24	22.2	不明原因	7	2.94	1800	1.68	7	7.76	2.63	39	2	13	11	B	IVF	4	0	2	0	0	0	0	否	否	全胚冷冻
419	0	C00012995	宋炜彤	≥35	45	3	刺激方案	1	248.077	＞10天	13	＞3000	3225	HCG	3	3	1	继发不孕	0.79	＞24	25.6	女方因素	7	4.69	1082	1.68	5	17.09	5.42	41	4	6	8.5	A	IVF	1	0	0	0	0	0	0	是		无可移植胚胎
1328	0	2018040016	李萍	≥35	45	2	拮抗剂方案	2	125	＞10天	24	≤3000	3000	HCG	1	2	1	继发不孕	0.73	≤24	23.4	混合因素	3	0.47	663	0.45	5	4.39	5.36	47.71	4	8	11.3	A	ICSI	1	0	2	0	0	0	0	否	否	全胚冷冻
912	0	C00016206	蔺爱	≥35	35	3	拮抗剂方案	2	185.714	≤10天	7	≤3000	1300	HCG	3	3	1	继发不孕	2.1	≤24	18	男方因素	4	4.95	961	0.88	4	7.3	4.15	39.09	2	9	12.4	A-B	ICSI	3	0	3	3	0	0	0	否	否	全胚冷冻
1830	0	2017040172	付正玲	≥35	43	1	拮抗剂方案	2	247.5	≤10天	10	≤3000	2475	HCG	3	3	2	继发不孕	0.93	＞24	27.7	女方因素	2	10.39	490	0.41	1	12.54	5.35	77.07	4	3	11.8	A	IVF	1	0	1	0	1	1	0	否	是	移植	未妊娠
500	0	2017070167	李莉萍	＜35	34	2	刺激方案	1	217.5	≤10天	10	≤3000	2175	HCG	3	2	1	继发不孕	2.71	≤24	19.2	女方因素	6	9.74	2487	1.06	7	11.66	8.23	44	1	9	6.2	A	IVF	2	0	2	0	0	0	0	否	否	全胚冷冻
527	0	C00016345	朱玉婷	＜35	26	1	降调节方案	3	198.75	＞10天	20	＞3000	3975	HCG	3	0	0	原发不孕	2.47	＞24	24.3	女方因素	6	2.46	2170	0.97	5	12.28	3.84	39	1	12	12.7	A	IVF	0	0	0	0	0	0	0	是		无可移植胚胎
634	0	C00003309	朱宁文	＜35	32	1	降调节方案	3	275	＞10天	15	＞3000	4125	HCG	3	3	1	继发不孕	1.87	＞24	28.2	女方因素	6	1.09	1001	0.69	6	9.43	2.39	60	1	9	13.2	A-B	IVF	5	0	4	2	2	2	0	否	是	移植	未妊娠
1173	0	2018070091	王芬	＜35	29	3	刺激方案	1	241.667	≤10天	9	≤3000	2175	HCG	5	0	0	原发不孕	0.52	≤24	21.1	男方因素	4	13.25	1159	1.36	3	6.9	3.67	42.91	3	5	6	B-C	ICSI	0	0	0	0	0	0	0	是		无可移植胚胎
663	0	C00010700	孙洪芳	≥35	44	1	刺激方案	1	150	≤10天	5	≤3000	750	HCG	6	5	1	继发不孕	0.70	≤24	22.6	女方因素	5	11	1682	1.17	4	14.3	7.33	53	4	7	4.7	B	IVF	2	0	2	0	0	0	0	否	否	全胚冷冻
569	0	C00010794	孙启梅	≥35	40	1	拮抗剂方案	2	159.375	≤10天	8	≤3000	1275	HCG	5	0	0	原发不孕	1.59	≤24	18	女方因素	6	1.43	1775	2.57	4	18.57	5.38	25	2	11	11	A	IVF	2	0	1	0	0	0	0	否	否	全胚冷冻
1794	0	C00016594	颜宁宁	≥35	43	1	刺激方案	1	230.769	＞10天	13	≤3000	3000	HCG	8	3	2	继发不孕	0.80	＞24	25	女方因素	2	16.31	551	0.55	2	6.94	5.94	91	4	3	6.3	B-C	IVF	2	0	2	1	0	0	0	否	否	全胚冷冻
39	0	2017110238	孟庆松	≥35	42	1	拮抗剂方案	2	200	≤10天	7	≤3000	1400	HCG	2	2	1	继发不孕	1.8	≤24	21.7	混合因素	9	3.03	2319	0.74	6	5.69	3.28	43.29	2	8	11.3	B	ICSI	4	0	3	1	0	0	0	否	否	全胚冷冻
2189	0	2017100100	何霞	≥35	38	2	刺激方案	1	150	≤10天	6	≤3000	900	双扳机	9	0	0	原发不孕	0.61	＞24	27	女方因素	1	5.37	285	0.33	0	12.56	5.5	40.37	4	4	#NULL!			0	0	0	0	0	0	0	是		未取到卵
1599	0	C00018607	宋炜彤	≥35	46	7	刺激方案	1	225	≤10天	8	≤3000	1800	HCG	3	3	1	继发不孕	0.96	＞24	25.6	男方因素	3	5.87	912	0.52	3	17.09	5.42	41	4	6	7.1	B-C	ICSI	1	0	0	0	0	0	0	是		无可移植胚胎
232	0	2018060111	董娜娜	＜35	30	1	降调节方案	3	135	≤10天	10	≤3000	1350	HCG	2	2	0	继发不孕	1.58	＞24	26	女方因素	8	1.23	1329	0.89	7	8.61	5.53	35.42	1	15	10.3	B	IVF	5	0	4	1	2	2	0	否	是	移植	未妊娠
2009	0	2018050218	李秀芳	≥35	40	1	刺激方案	1	150	≤10天	6	≤3000	900	HCG	2	2	1	继发不孕	1.95	≤24	20.8	女方因素	1	1.43	920	0.89	3	8.58	2.48	59.09	2	7	10.3	A	IVF	3	0	2	1	2	2	0	否	是	移植	未妊娠
464	0	2017070082	李祥敏	≥35	38	4	降调节方案	3	283.333	≤10天	9	≤3000	2550	HCG	2	2	1	继发不孕	1.51	≤24	20.2	女方因素	6	12	1855	1.6	6	5.04	2.14	59.09	2	9	6	B	IVF	3	0	2	0	0	0	0	否	否	全胚冷冻
1325	0	C00019092	赵平丽	≥35	42	1	拮抗剂方案	2	225	≤10天	10	≤3000	2250	HCG	10	2	1	继发不孕	2.03	≤24	22.9	女方因素	3	2.86	671.22	1	5	10.69	6.75	30	2	9	14.2	B	IVF	4	0	2	1	0	0	0	否	否	全胚冷冻
[truncated: 9 more columns]
