# Supplementary material for: More exogenous Gn starting doses are not beneficial for poor ovarian responders in POSEIDON groups: a propensity score matching retrospective cohort study
Source: Research Square preprint supplement (doi:10.21203/rs.3.rs-6441527/v1), 2025-08-06
Supplement: Supplementary file 2 [file b243e67e1a7b7ac8a606b51c.xlsx]

## Sheet: IVF-ICSI
ID	分组	病历号	姓名	年龄分组	年龄	第几取卵	COS方案	COH分组	每日Gn	Gn天数分组	Gn天数	Gn总量分组	Gn总量	扳机	不孕年限	孕次	产次	不孕类型	AMH	BMI分组	体重指数	诊断	扳机日卵泡数	扳机日LH	扳机日E2	扳机日P	获卵数	基础FSH	基础LH	基础E2	波塞冬分组	AFC	扳机日内膜厚度	扳机日内膜形态	实验室授精方式	正常受精卵子总数	有效囊胚	有效胚胎	优质胚胎	新鲜移植胚胎总数	D234移植个数	D567移植个数	周期取消	鲜胚移植	周期结局	妊娠结果	临床妊娠	妊娠类型	妊娠诊断
923	1	2017120180	薛广华	≥35	38	2	刺激方案	1	300	＞10天	15	＞3000	4500	HCG	3	2	0	继发不孕	0.65	＞24	28	不明原因	4	1.77	890	0.58	4	8.15	2.04	34.56	4	5	13	B	IVF	2	0	1	0	0	0	0	否	否	全胚冷冻
1016	1	C00017862	王艳玲	≥35	45	1	拮抗剂方案	2	300	＞10天	11	＞3000	3300	HCG	1	3	1	继发不孕	0.55	≤24	17.1	女方因素	4	5.79	1205	1.05	6	3.24	2.04	91.75	4	9	10.8	A-B	IVF	4	0	2	0	2	2	0	否	是	移植	未妊娠
1158	1	C00019166	王艳玲	≥35	45	4	拮抗剂方案	2	300	≤10天	6	≤3000	1800	HCG	1	3	0	继发不孕	0.12	≤24	17.1	女方因素	4	2.4	1232.93	0.76	4	3.24	2.04	41.75	4	7	7.2	B	IVF	3	0	0	0	0	0	0	是		无可移植胚胎
1293	0	2017020212	孙丰荣	≥35	43	6	刺激方案	1	172.5	≤10天	10	≤3000	1725	HCG	2	6	1	继发不孕	0.9	＞24	26.8	女方因素	3	8.71	793	1.68	3	5.2	2.04	36	4	5	8.1	A-B	IVF	2	0	2	1	0	0	0	否	否	全胚冷冻
1362	1	2018010171	薛广华	≥35	38	3	刺激方案	1	300	≤10天	6	≤3000	1800	HCG	3	2	0	继发不孕	0.45	＞24	28	不明原因	3	2.25	544	0.43	3	8.15	2.04	34.56	4	5	11.7	B	IVF	3	0	2	1	2	2	0	否	是	移植	已妊娠	临床妊娠	宫内妊娠	单胎宫内妊娠
2101	0	C00019730	王艳玲	≥35	46	5	拮抗剂方案	2	150	≤10天	7	≤3000	1050	HCG	1	3	0	继发不孕	0.49	≤24	17.1	女方因素	1	5.11	463.5	0.39	1	3.24	2.04	31.75	4	3	8.8	A	IVF	1	0	1	1	1	2	0	否	是	移植	未妊娠
2108	0	C00019081	王艳玲	≥35	45	3	刺激方案	1	150	≤10天	6	≤3000	900	双扳机	1	3	0	继发不孕	0.221	≤24	17.1	女方因素	1	10.82	454.42	0.86	2	3.24	2.04	41.75	4	5	5.3	B	IVF	1	0	1	0	0	0	0	否	否	全胚冷冻
1505	1	C00018991	蔡燕	≥35	43	1	拮抗剂方案	2	450	≤10天	9	＞3000	4050	HCG	4	1	1	继发不孕	0.22	≤24	20.2	女方因素	3	2.64	934	0.5	3	12.49	2.07	52.55	4	8	10	A	IVF	1	0	1	0	1	1	0	否	是	移植	未妊娠
2167	1	C00004335	刘晓莉	≥35	46	1	拮抗剂方案	2	290.625	≤10天	8	≤3000	2325	双扳机	1	7	1	继发不孕	0.11	≤24	20.3	女方因素	1	7.57	326	0.68	1	9.38	2.07	102	4	3	5.7	A	IVF	0	0	0	0	0	0	0	是		无可移植胚胎
2168	0	C00009676	付树清	≥35	49	1	刺激方案	1	225	≤10天	5	≤3000	1125	HCG	7	4	0	继发不孕	0.52	＞24	27.9	混合因素	1	6.2	324	0.11	1	13.6	2.07	10	4	2	0.52	B	ICSI	1	0	1	0	0	0	0	否	否	全胚冷冻
1708	0	C00004467	卜淑娟	≥35	38	8	拮抗剂方案	2	281.25	≤10天	8	≤3000	2250	双扳机	1	4	0	继发不孕	0.49	≤24	16.4	男方因素	2	3.96	736	1.41	2	7.38	2.08	52	4	6	8.9	A	IVF	1	0	1	0	0	0	0	否	否	全胚冷冻
712	1	2017090266	李珊珊	＜35	28	1	降调节方案	3	294.318	＞10天	11	＞3000	3237.5	HCG	10	0	0	原发不孕	0.89	＞24	26	女方因素	5	3.31	1624	0.94	4	6.81	2.09	22	3	6	16	A-B	IVF	1	0	1	0	1	1	0	否	是	移植	未妊娠
168	1	2018050081	徐先菊	≥35	40	1	降调节方案	3	409.091	＞10天	11	＞3000	4500	HCG	2	1	1	继发不孕	0.567	≤24	19.3	女方因素	6	0.62	1268	1.1	5	7.26	2.1	46.43	4	7	11.8	A	IVF	5	0	5	4	2	2	0	否	是	移植	未妊娠
1817	0	C00012838	董苹	＜35	29	1	拮抗剂方案	2	281.25	≤10天	8	≤3000	2250	HCG	1	1	1	继发不孕	1.15	≤24	19.1	女方因素	2	0.59	512	0.29	2	15.25	2.11	17	3	4	13	A-B	IVF	1	0	1	0	0	0	0	否	否	全胚冷冻
1862	1	2018010175	侯艳荣	≥35	42	2	刺激方案	1	300	≤10天	5	≤3000	1500	HCG	3	2	1	继发不孕	0.62	≤24	23.4	混合因素	2	20.7	373	2.25	0	6.88	2.13	39.5	4	4	7.6	A-B		0	0	0	0	0	0	0	是		未取到卵
1917	0	2017110193	侯艳荣	≥35	42	1	刺激方案	1	225	≤10天	8	≤3000	1800	HCG	3	2	1	继发不孕	0.137	≤24	23.4	混合因素	2	10.55	490	0.31	1	6.88	2.13	40	4	4	5.4	C	ICSI	0	0	0	0	0	0	0	是		无可移植胚胎
1129	0	2016050139	张俊茹	≥35	39	1	刺激方案	1	182.143	＞10天	14	≤3000	2550	HCG	2	3	1	继发不孕	0.94	≤24	23.4	女方因素	4	7.08	1350	1.35	2	8.72	2.14	32.34	4	5	10.4	A	IVF	2	0	1	0	1	1	0	否	是	移植	未妊娠
2278	0	2017100066	王玉萍	＜35	30	1	刺激方案	1	187.5	≤10天	8	≤3000	1500	HCG	4	0	0	原发不孕	0.95	≤24	21.6	女方因素	1	9.65	433	2.5	0	12.16	2.16	44	3	4				0	0	0	0	0	0	0	是		未取到卵
1608	0	C00015898	尚连芳	≥35	40	1	拮抗剂方案	2	283.333	≤10天	9	≤3000	2550	HCG	2	2	1	继发不孕	0.76	＞24	24.4	女方因素	2	6.82	989	1.16	2	6.81	2.2	37.19	4	5	11.5	B	IVF	2	0	2	2	0	0	0	否	否	全胚冷冻
1729	1	2016100131	邢爱景	≥35	47	2	刺激方案	1	300	≤10天	8	≤3000	2400	HCG	1	0	0	继发不孕	0.80	≤24	22.8	女方因素	2	7.1	680	0.9	2	17.89	2.2	41	4	3	5	A	IVF	1	0	1	0	0	0	0	否	否	全胚冷冻
1634	0	2017080122	刘书香	≥35	41	2	刺激方案	1	225	≤10天	9	≤3000	2025	HCG	4	4	1	继发不孕	0.6	＞24	26.2	男方因素	2	2.59	899	0.32	3	6.52	2.23	45.98	4	5	8.2	B	ICSI	4	0	2	2	0	0	0	否	否	全胚冷冻
1180	0	2016080052	赵洪燕	＜35	33	2	刺激方案	1	247.5	≤10天	10	≤3000	2475	HCG	4	1	1	继发不孕	0.23	＞24	24.8	混合因素	4	1.84	1129	0.93	2	7.47	2.26	84.41	3	3	9.9	B	ICSI	1	0	0	0	0	0	0	是		无可移植胚胎
1816	1	2016040129	王明爱	≥35	43	1	刺激方案	1	316.667	≤10天	9	≤3000	2850	HCG	3	1	0	继发不孕	0.365	≤24	20.3	女方因素	2	0.51	516	0.42	0	8.91	2.27	29.6	4	3	7.5	A-B		0	0	0	0	0	0	0	是		未取到卵
1870	1	2016060158	王明爱	≥35	43	2	刺激方案	1	300	≤10天	9	≤3000	2700	HCG	3	1	0	继发不孕	0.11	≤24	20.3	女方因素	2	0.33	351	0.54	1	8.91	2.27	29.6	4	3	11.4		IVF	1	0	1	0	0	0	0	否	否	全胚冷冻
1985	0	2017100160	王明爱	≥35	44	6	刺激方案	1	150	≤10天	7	≤3000	1050	HCG	3	1	0	继发不孕	0.76	≤24	20.3	女方因素	2	8.56	393	0.34	2	8.91	2.27	70.1	4	3	9.5	A-B	IVF	2	0	2	1	0	0	0	否	否	全胚冷冻
2110	0	2017020078	王明爱	≥35	44	5	刺激方案	1	150	≤10天	7	≤3000	1050	HCG	3	1	0	继发不孕	0.9	≤24	20.3	女方因素	1	16.07	454	1.52	1	8.91	2.27	70.1	4	3	10.5	B	IVF	1	0	1	0	0	0	0	否	否	全胚冷冻
1342	1	2016120119	郝琳	＜35	33	1	刺激方案	1	318.75	≤10天	8	≤3000	2550	HCG	5	0	0	原发不孕	0.90	＞24	25.9	混合因素	3	16.85	615	0.5		8.05	2.31	78	3	6	11	A		0	0	0	0	0	0	0	是		未取卵
2020	0	2017080163	李红	≥35	45	1	拮抗剂方案	2	241.667	≤10天	9	≤3000	2175	HCG	11	4	0	原发不孕	0.48	＞24	31.3	混合因素	1	24.39	771	0.69		9.48	2.31	99.09	4	3	6.8	A-B		0	0	0	0	0	0	0	是		未取卵
1068	1	C00016465	林海燕	≥35	47	6	刺激方案	1	422.727	＞10天	11	＞3000	4650	HCG	20	1	0	继发不孕	0.38	＞24	28.2	女方因素	4	2.35	1588	0.99	4	7.3	2.34	35	4	4	9.4	A-B	IVF	2	0	2	1	0	0	0	否	否	全胚冷冻
2050	0	C00018188	林海燕	≥35	47	8	刺激方案	1	210	≤10天	10	≤3000	2100	HCG	20	1	0	继发不孕	0.67	＞24	28.2	女方因素	1	5.18	652.93	0.17	1	7.3	2.34	35	4	3	0.56	B	IVF	0	0	0	0	0	0	0	是		无可移植胚胎
1397	0	2017010069	吴贵月	＜35	26	1	降调节方案	3	187.5	＞10天	14	≤3000	2625	HCG	3	0	0	原发不孕	1.07	＞24	28	女方因素	3	1.39	888	0.71	3	6.18	2.35	78.43	3	4	11.2	A-B	IVF	3	0	2	2	2	2	0	否	是	移植	已妊娠	临床妊娠	宫内妊娠	双胎宫内妊娠
1989	0	2018040149	王芳	≥35	45	1	刺激方案	1	225	≤10天	7	≤3000	1575	HCG	1	0	0	原发不孕	0.42	≤24	23.6	女方因素	2	10	405	0.43	2	7.74	2.36	60.56	4	8	4.8	A	IVF	2	0	1	0	0	0	0	否	否	全胚冷冻
2181	1	2017070210	左丽	≥35	36	1	降调节方案	3	364.286	≤10天	7	≤3000	2550	HCG	1	1	0	继发不孕	0.77	＞24	26.7	混合因素	1	17.73	304	3.78	0	16.73	2.41	56.89	4	5	7.7	A		0	0	0	0	0	0	0	是		未取到卵
1133	0	2017070031	李秀梅	≥35	42	4	降调节方案	3	240	≤10天	10	≤3000	2400	HCG	1	4	1	继发不孕	0.58	＞24	26	混合因素	4	0.78	1338	0.55	5	15.05	2.42	17	4	8	8.3	B	ICSI	3	0	3	2	0	0	0	否	否	全胚冷冻
1431	1	C00010756	赵玉香	≥35	46	1	刺激方案	1	300	≤10天	10	≤3000	3000	HCG	11	4	1	继发不孕	0.54	≤24	23.3	混合因素	3	23.79	955	8.79	0	14.26	2.43	34	4	4	5.6	B		0	0	0	0	0	0	0	是		未取到卵
1021	1	C00009097	王静	≥35	37	2	刺激方案	1	436.364	＞10天	11	＞3000	4800	HCG	3	2	1	继发不孕	0.81	≤24	20.2	混合因素	4	6.02	1189	0.66	2	10.1	2.5	36	4	6	0.82	A-B	ICSI	1	0	1	0	0	0	0	否	否	全胚冷冻
1549	1	C00018963	王静	≥35	39	6	刺激方案	1	300	≤10天	9	≤3000	2700	HCG	4	2	1	继发不孕	0.41	≤24	20.2	混合因素	3	7.84	1160.27	0.8	4	10.1	2.5	36	4	5	10.5	A	ICSI	5	0	2	0	2	2	0	否	是	移植	未妊娠
1166	0	2016120014	张吉玲	≥35	36	2	刺激方案	1	270	≤10天	10	≤3000	2700	HCG	1	4	1	继发不孕	0.54	＞24	25.7	女方因素	4	2.59	1198	0.72	4	5.23	2.51	42	4	5	8.1	B	IVF	2	0	1	0	0	0	0	否	否	全胚冷冻
1468	0	C00005218	何华珍	≥35	48	1	刺激方案	1	259.615	＞10天	13	＞3000	3375	双扳机	1	6	2	继发不孕	0.32	≤24	19.6	女方因素	3	6.75	952	0.97	1	5.23	2.51	42	4	4	4.6	B	IVF	1	0	1	1	0	0	0	否	否	全胚冷冻
1697	0	2016090219	张吉玲	≥35	36	1	刺激方案	1	225	≤10天	8	≤3000	1800	HCG	1	4	1	继发不孕	0.93	＞24	25.7	女方因素	2	1.31	757	0.33	3	5.23	2.51	42	4	5	6.8	B	IVF	3	0	1	0	0	0	0	否	否	全胚冷冻
1639	1	C00004501	文风花	≥35	48	1	刺激方案	1	375	≤10天	9	＞3000	3375	HCG	2	3	2	继发不孕	0.32	＞24	25	女方因素	2	4.34	890	2.82	2	8.69	2.52	35.23	4	4	0.84	B	IVF	2	0	1	0	0	0	0	否	否	全胚冷冻
2125	1	C00014910	谭希兰	≥35	46	1	拮抗剂方案	2	398.438	＞10天	16	＞3000	6375	HCG	1	1	1	继发不孕	0.09	≤24	23.9	混合因素	1	9.29	424	1.04	1	14.25	2.52	24	4	3	11.2	A		0	0	0	0	0	0	0	是		未行授精
1812	1	C00012710	尹燕留	≥35	45	2	刺激方案	1	300	≤10天	7	≤3000	2100	HCG	1	4	1	继发不孕	0.33	＞24	26.7	女方因素	2	0.68	526	0.16	3	8.52	2.53	31	4	7	0.72	A-B	IVF	3	0	1	0	0	0	0	否	否	全胚冷冻
1911	0	2016110009	曹红华	≥35	38	2	刺激方案	1	225	≤10天	6	≤3000	1350	HCG	2	3	1	继发不孕	0.06	≤24	21.8	女方因素	2	1.86	502	1.11	4	7.42	2.55	45.76	4	4	11.5	A-B	IVF	2	0	1	0	0	0	0	否	否	全胚冷冻
1969	0	2016060028	曹红华	≥35	38	1	刺激方案	1	225	≤10天	9	≤3000	2025	HCG	2	3	1	继发不孕	0.17	≤24	21.8	女方因素	4	0.41	863	3.02	5	7.42	2.55	56.76	4	4	9	B-C	IVF	1	0	1	0	0	0	0	否	否	全胚冷冻
1051	1	2016040138	李秀梅	≥35	41	2	刺激方案	1	416.667	≤10天	9	＞3000	3750	HCG	1	4	1	继发不孕	1.13	＞24	26	男方因素	4	1.24	1736	0.75	2	10.45	2.59	39	4	7	7.3	B	ICSI	0	0	0	0	0	0	0	是		无可移植胚胎
1648	1	C00003663	施慧媛	≥35	44	1	刺激方案	1	365.625	≤10天	8	≤3000	2925	双扳机	3	1	1	原发不孕	0.10	≤24	23.9	女方因素	2	9.96	866	1.21	1	3.39	2.59	44	4	4	6.3	A	IVF	1	0	1	0	0	0	0	否	否	全胚冷冻
2124	1	2017070201	逯伟	≥35	36	1	拮抗剂方案	2	410.4	＞10天	15	＞3000	6156	双扳机	3	3	1	继发不孕	0.77	＞24	27.3	男方因素	1	5.06	426	0.36	1	10.83	2.6	88.08	4	3	11.7	B	ICSI	4	0	3	1	0	0	0	否	否	全胚冷冻
1346	1	C00018888	侯敏	≥35	44	1	刺激方案	1	450	＞10天	11	＞3000	4950	HCG	1	2	1	继发不孕	0.37	＞24	25.4	男方因素	3	9.27	609.56	0.61	4	7.24	2.62	52.87	4	7	6.7	B-C	ICSI	1	0	0	0	0	0	0	是		无可移植胚胎
1845	1	C00018627	王连琼	≥35	38	2	拮抗剂方案	2	300	＞10天	12	＞3000	3600	HCG	2	3	0	继发不孕	0.96	≤24	18.4	女方因素	2	6.94	444.65	0.2	4	5.9	2.64	91.75	4	7	12.7	B	IVF	3	0	2	0	2	2	0	否	是	移植	已妊娠	临床妊娠	宫内妊娠	单胎宫内妊娠
1389	0	2018010106	田相云	≥35	44	1	刺激方案	1	225	≤10天	10	≤3000	2250	HCG	3	1	1	继发不孕	0.64	≤24	24	女方因素	3	7.3	905	2.18	4	7.35	2.65	43	4	5	10.8	B	IVF	2	0	2	0	0	0	0	否	否	全胚冷冻
1702	0	2017060157	阮美丽	≥35	45	1	降调节方案	3	225	≤10天	4	≤3000	900	HCG	2	3	1	继发不孕	0.15	＞24	25.7	女方因素	2	6.43	752	0.39	3	15.98	2.65	49.09	4	4	9.5	A	IVF	1	0	1	0	1	1	0	否	是	移植	未妊娠
888	0	C00015288	刘养栓	≥35	48	1	拮抗剂方案	2	215.625	≤10天	8	≤3000	1725	HCG	9	2	2	继发不孕	0.31	≤24	23.4	女方因素	5	9.5	1092	0.8	2	7.44	2.68	33	4	5	14	A	IVF	0	0	0	0	0	0	0	是		无可移植胚胎
956	0	2017070224	颜翠	＜35	32	4	刺激方案	1	283.333	≤10天	9	≤3000	2550	HCG	3	0	0	原发不孕	1.15	≤24	23	男方因素	4	8.18	612	0.54	4	9.66	2.68	32.76	3	5	8.2	A-B	ICSI	2	0	2	0	0	0	0	否	否	全胚冷冻
1303	1	2016060246	颜翠	＜35	31	1	刺激方案	1	290.625	≤10天	8	≤3000	2325	HCG	3	0	0	原发不孕	1.18	≤24	23	女方因素	3	1.84	772	0.55	3	9.66	2.68	56.76	3	5	14.6	B	IVF	0	0	0	0	0	0	0	是		未受精
1334	1	2016070075	袁红彬	≥35	45	2	刺激方案	1	300	≤10天	5	≤3000	1500	HCG	5	6	1	继发不孕	0.20	＞24	24.4	混合因素	3	18.68	644	1.25	0	10.16	2.68	41	4	3	2.7			0	0	0	0	0	0	0	是		未取到卵
1671	1	C00011671	王瑞	＜35	29	1	刺激方案	1	390.909	＞10天	11	＞3000	4300	HCG	3	0	0	原发不孕	0.63	＞24	31	女方因素	2	11.27	826	1.56	1	6.03	2.68	40	3	6	0.78	B	IVF	1	0	1	0	0	0	0	否	否	全胚冷冻
1689	1	C00015544	张金霞	≥35	43	1	刺激方案	1	300	＞10天	11	＞3000	3300	HCG	2	0	0	原发不孕	0.37	≤24	22.5	混合因素	2	10.58	774	0.59	0	6.03	2.68	40	4	5	0.87	B		0	0	0	0	0	0	0	是		未取到卵
1795	0	C00016318	刘养栓	≥35	49	3	拮抗剂方案	2	150	≤10天	9	≤3000	1350	HCG	9	2	2	继发不孕	0.89	≤24	23.4	女方因素	2	8.09	547	0.69	2	7.44	2.68	33	4	5	9.5	A	IVF	0	0	0	0	0	0	0	是		无可移植胚胎
2111	0	C00017379	刘养栓	≥35	49	4	刺激方案	1	150	≤10天	7	≤3000	1050	HCG	9	2	2	继发不孕	0.81	≤24	23.4	混合因素	1	14.77	452	0.63		7.44	2.68	33	4	5	10	A		0	0	0	0	0	0	0	是		未取卵
2177	0	C00015920	刘养栓	≥35	49	2	拮抗剂方案	2	225	≤10天	7	≤3000	1575	HCG	1	2	2	继发不孕	0.14	≤24	23.4	女方因素	1	7.03	312	0.65	1	7.44	2.68	33	4	5	8.9	A	IVF	0	0	0	0	0	0	0	是		无可移植胚胎
2228	1	2018030212	于静	≥35	37	4	刺激方案	1	472.5	≤10天	10	＞3000	4725	双扳机	3	0	0	原发不孕	0.73	≤24	23.6	混合因素	1	6.34	169	0.71	3	8.93	2.69	41.75	4	6	8.9	A	ICSI	1	0	1	0	0	0	0	否	否	全胚冷冻
1653	1	C00012086	李邦洪	≥35	44	1	拮抗剂方案	2	345	≤10天	10	＞3000	3450	HCG	1	2	2	继发不孕	0.5	＞24	25	女方因素	2	9.77	854	0.64	2	7.82	2.71	48	4	7	1.31	A	IVF	1	0	0	0	0	0	0	是		无可移植胚胎
1714	0	C00015189	李邦洪	≥35	44	3	拮抗剂方案	2	284.615	＞10天	13	＞3000	3700	HCG	1	2	2	继发不孕	0.85	＞24	25	混合因素	2	16.58	722	0.78	0	7.82	2.71	48	4	5	12.1	A-B		0	0	0	0	0	0	0	是		未取到卵
1735	1	C00015595	李邦洪	≥35	45	4	刺激方案	1	375	≤10天	9	＞3000	3375	HCG	1	2	2	继发不孕	0.5	＞24	25	混合因素	2	7.35	667	0.73	2	7.82	2.71	48	4	7	10.6	A	ICSI	2	0	2	0	2	2	0	否	是	移植	未妊娠
504	1	C00017315	于英	≥35	46	2	刺激方案	1	300	≤10天	9	≤3000	2700	HCG	5	4	1	继发不孕	0.8	＞24	24.5	女方因素	6	9.6	2438	2.07	5	10.62	2.72	90	4	7	6.9	C	IVF	4	0	2	0	0	0	0	否	否	全胚冷冻
1758	0	2016020134	郑加玉	≥35	37	2	刺激方案	1	225	≤10天	7	≤3000	1575	HCG	4	0	0	原发不孕	0.71	＞24	26.6	男方因素	2	4.86	614	0.7	3	9.78	2.72	53	4	4	7.3	B	ICSI	2	0	1	0	0	0	0	否	否	全胚冷冻
2022	1	C00013011	于英	≥35	46	1	刺激方案	1	450	≤10天	7	＞3000	3150	HCG	5	4	1	继发不孕	0.48	＞24	24.5	女方因素	1	14.86	744	0.63	1	10.62	2.72	90	4	2	0.53	B-C	IVF	0	0	0	0	0	0	0	是		无可移植胚胎
2121	0	2017030169	郑加玉	≥35	38	4	拮抗剂方案	2	255	≤10天	5	≤3000	1275	HCG	5	0	0	原发不孕	1.52	＞24	26.6	男方因素	1	5.25	431	0.38	1	7.67	2.72	56.76	4	4	7.5	A	ICSI	1	0	1	0	0	0	0	否	否	全胚冷冻
806	1	C00012180	王慧君	≥35	47	2	拮抗剂方案	2	346.875	≤10天	8	≤3000	2775	HCG	3	1	1	原发不孕	0.16	≤24	24	女方因素	5	6.29	1588	0.55	4	5.32	2.74	77	4	9	0.63	A	IVF	3	0	2	1	0	0	0	否	否	全胚冷冻
925	0	C00013032	王全英	≥35	42	1	拮抗剂方案	2	281.25	≤10天	8	≤3000	2250	HCG	1	1	1	继发不孕	0.44	＞24	28.2	女方因素	4	2.76	886	0.49	4	6.9	2.74	19.7	4	6	1.19	B	IVF	3	0	0	0	0	0	0	是		无可移植胚胎
1105	1	C00015561	王全英	≥35	42	2	刺激方案	1	300	＞10天	12	＞3000	3600	HCG	1	1	1	继发不孕	0.9	＞24	28.2	女方因素	4	11.73	1420	0.61	1	6.9	2.74	19.7	4	6	1.26	A-B	IVF	0	0	0	0	0	0	0	是		无可移植胚胎
2237	1	C00012200	孔宪玲	≥35	38	1	刺激方案	1	300	≤10天	8	≤3000	2400	HCG	1	1	1	继发不孕	0.3	≤24	23.5	混合因素	1	13.54	228	1.3	0	9.57	2.74	54	4	3	0.45	A-B		0	0	0	0	0	0	0	是		未取到卵
1751	0	C00018787	邓翠丹	＜35	34	1	拮抗剂方案	2	150	≤10天	7	≤3000	1050	HCG	3	2	0	继发不孕	0.16	≤24	22.9	女方因素	2	4.7	629.97	0.71	2	8.56	2.76	29.42	3	4	7.8	A-B	IVF	1	0	1	0	0	0	0	否	否	全胚冷冻
1791	0	2017030028	宋景华	≥35	50	3	刺激方案	1	225	≤10天	6	≤3000	1350	HCG	9	1	1	继发不孕	0.51	＞24	27	女方因素	2	5.86	557	0.78	2	6.09	2.76	43.77	4	2	4	B	IVF	0	0	0	0	0	0	0	是		无可移植胚胎
1807	1	C00012130	刘恩芳	≥35	42	1	拮抗剂方案	2	338.889	≤10天	9	＞3000	3050	HCG	1	4	0	继发不孕	0.560	≤24	20	女方因素	2	4.46	532	0.37	2	9.21	2.76	35	4	5	0.77	A	IVF	2	0	2	1	1	1	0	否	是	移植	已妊娠	临床妊娠	宫内妊娠	单胎宫内妊娠
1878	0	2016050205	宋景华	≥35	49	1	刺激方案	1	150	≤10天	9	≤3000	1350	HCG	9	1	1	继发不孕	0.54	＞24	28	女方因素	2	5.33	291	1.22	1	6.09	2.76	53.77	4	2	3	B	IVF	1	0	1	0	0	0	0	否	否	全胚冷冻
1919	1	2017050243	尹秀红	≥35	38	1	拮抗剂方案	2	332.143	≤10天	7	≤3000	2325	HCG	15	0	0	原发不孕	0.44	＞24	31	女方因素	2	4.16	484	0.91	1	6.08	2.76	40.2	4	2	13.1	A	IVF	0	0	0	0	0	0	0	是		未受精
1752	1	C00008447	伊爽	≥35	37	2	刺激方案	1	375	≤10天	9	＞3000	3375	HCG	3	0	0	原发不孕	1.05	＞24	24.6	混合因素	2	12.68	626	0.22	2	14.94	2.77	10	4	4	0.72	A	ICSI	2	0	2	0	0	0	0	否	否	全胚冷冻
1823	0	C00003571	伊爽	≥35	37	1	刺激方案	1	200	≤10天	6	≤3000	1200	HCG	3	0	0	原发不孕	1.05	＞24	24.6	混合因素	2	9.66	506	0.42	2	14.94	2.77	10	4	4	6.5	A	ICSI	2	0	2	1	0	0	0	否	否	全胚冷冻
2186	1	2017030231	王莲芹	≥35	45	1	刺激方案	1	341.667	≤10天	9	＞3000	3075	HCG	5	5	1	继发不孕	0.62	＞24	24.8	女方因素	1	13.9	289	0.16		4.37	2.77	34.76	4	3	4.9	B		0	0	0	0	0	0	0	是		未取卵
253	0	C00015950	周升花	≥35	50	4	拮抗剂方案	2	238.889	≤10天	9	≤3000	2150	HCG	4	2	1	继发不孕	0.38	≤24	23.3	女方因素	7	2.52	1556	1.33	5	6.47	2.78	49	4	4	11.9	B	IVF	3	0	2	1	2	2	0	否	是	移植	未妊娠
1256	0	C00017155	周升花	≥35	50	7	拮抗剂方案	2	275	≤10天	6	≤3000	1650	HCG	5	2	1	继发不孕	0.626	≤24	23.3	男方因素	3	2.99	903	0.49	2	6.47	2.78	49	4	4	10	A-B	ICSI	1	0	1	0	1	1	0	否	是	移植	未妊娠
1350	1	C00013423	周升花	≥35	49	2	拮抗剂方案	2	342.857	≤10天	7	≤3000	2400	HCG	4	1	1	继发不孕	0.54	≤24	23.3	男方因素	3	1.88	590	0.77	3	6.47	2.78	49	4	4	10	B	ICSI	3	0	0	0	0	0	0	是		无可移植胚胎
2146	0	C00016524	周升花	≥35	50	5	刺激方案	1	150	≤10天	7	≤3000	1050	双扳机	5	2	1	继发不孕	0.42	≤24	23.3	男方因素	1	5.43	377	0.76	1	6.47	2.78	49	4	4	6	B	ICSI	0	0	0	0	0	0	0	是		未受精
1523	0	C00011288	张艳艳	≥35	48	1	刺激方案	1	150	≤10天	6	≤3000	900	HCG	2	1	1	继发不孕	0.51	≤24	21.1	女方因素	3	12.08	819	0.67	2	12.96	2.79	81.1	4	3	0.91	A	IVF	2	0	2	1	0	0	0	否	否	全胚冷冻
1698	0	C00014131	张艳艳	≥35	48	2	刺激方案	1	150	≤10天	5	≤3000	750	HCG	2	1	1	继发不孕	0.91	≤24	21.1	女方因素	2	14.57	756	0.42	1	12.96	2.79	80.6	4	3	6.1		IVF	0	0	0	0	0	0	0	是		无可移植胚胎
1043	1	2016050016	王华晨	≥35	41	1	降调节方案	3	346.875	≤10天	8	≤3000	2775	HCG	1	5	1	继发不孕	0.44	＞24	26.6	女方因素	4	5.25	1781	0.9	2	7.18	2.81	40	4	3	6.4		IVF	2	0	2	1	0	0	0	否	否	全胚冷冻
1055	1	2016010157	邵丽	＜35	33	3	刺激方案	1	375	≤10天	8	≤3000	3000	HCG	5	0	0	原发不孕	0.691	≤24	22	男方因素	4	4	1698	1.26	4	8.63	2.84	36.43	3	5	8.3	A	ICSI	2	0	2	0	2	2	0	否	是	移植	未妊娠
444	0	2017060009	王淑华	≥35	45	1	刺激方案	1	225	≤10天	7	≤3000	1575	HCG	2	2	1	继发不孕	1.05	＞24	24.5	女方因素	6	8.85	1839	1.61	7	6.01	2.85	70	4	10	9.5	B	IVF	2	0	2	1	0	0	0	否	否	全胚冷冻
2116	1	C00012072	洪东霞	≥35	46	1	刺激方案	1	300	≤10天	4	≤3000	1200	HCG	4	3	0	继发不孕	0.91	≤24	21.3	女方因素	1	14.3	443	1.07	1	10.78	2.85	63	4	3	0.47	B	IVF	0	0	0	0	0	0	0	是		无可移植胚胎
686	1	2017020034	王蕊	≥35	42	1	降调节方案	3	300	≤10天	9	≤3000	2700	HCG	1	2	1	继发不孕	1.12	≤24	23.4	女方因素	5	3.45	1786	1.7	5	9.58	2.86	69.73	4	6	10.8	A	IVF	3	0	1	0	1	1	0	否	是	移植	未妊娠
2212	1	2018060016	焦念丰	≥35	48	2	拮抗剂方案	2	321.429	≤10天	7	≤3000	2250	双扳机	1	3	1	继发不孕	0.16	≤24	23.7	女方因素	1	3.58	236	0.61	0	13.03	2.88	52	4	3	7.8	A		0	0	0	0	0	0	0	是		未取到卵
1097	1	2016090092	姜丽敏	≥35	36	1	降调节方案	3	375	≤10天	9	＞3000	3375	HCG	10	0	0	原发不孕	0.59	＞24	29.3	女方因素	4	5.41	1456	0.67	4	5.23	2.89	40	4	6			IVF	3	0	2	1	2	2	0	否	是	移植	未妊娠
1047	1	2017030271	许玲	≥35	42	1	拮抗剂方案	2	330	≤10天	10	＞3000	3300	HCG	3	0	0	原发不孕	0.39	≤24	20.4	女方因素	4	1.39	1753	0.62	4	12.9	2.9	40.37	4	6	11.2	B	IVF	3	0	2	0	0	0	0	否	否	全胚冷冻
1120	1	2017090285	刘玉玲	≥35	39	4	刺激方案	1	400	≤10天	9	＞3000	3600	HCG	2	2	1	继发不孕	0.47	＞24	24.7	混合因素	4	8.18	1386	0.51	3	12.9	2.9	40.37	4	7	7.2	B-C	ICSI	3	0	1	0	0	0	0	否	否	全胚冷冻
1294	1	C00005563	葛爱芹	≥35	47	1	刺激方案	1	330	≤10天	10	＞3000	3300	HCG	1	2	2	继发不孕	0.82	＞24	29.4	女方因素	3	3.07	788	0.33	3	12.9	2.9	40.37	4	6	15.9	B	IVF	3	0	2	0	0	0	0	否	否	全胚冷冻
1499	0	2016040177	耿洁	≥35	41	2	刺激方案	1	218.182	＞10天	11	≤3000	2400	HCG	8	1	0	继发不孕	0.98	＞24	28.1	女方因素	3	3.11	958	0.65	2	9.32	2.9	25	4	9	7.7	A-B	IVF	2	0	0	0	0	0	0	是		无可移植胚胎
2011	1	2017060129	熊巩莹	＜35	27	2	刺激方案	1	631.25	＞10天	12	＞3000	7575	HCG	4	1	0	继发不孕	0.29	＞24	27.1	女方因素	1	5.55	861	0.67	1	12.9	2.9	67.37	3	5	4.1	B	IVF	1	0	0	0	0	0	0	是		无可移植胚胎
2217	0	2017030161	殷炜炜	≥35	37	1	刺激方案	1	159.375	≤10天	8	≤3000	1275	HCG	4	1	1	继发不孕	0.89	≤24	23	女方因素	1	5.51	209	0.23	0	6.87	2.9	45.98	4	5	12.1	A		0	0	0	0	0	0	0	是		未取到卵
1843	1	2017100097	张伟	≥35	43	1	刺激方案	1	323.077	＞10天	13	＞3000	4200	HCG	2	3	2	继发不孕	0.73	＞24	28.2	女方因素	2	9.79	456	0.86	2	7.95	2.91	30.1	4	4	10.7	A	IVF	1	0	0	0	0	0	0	是		无可移植胚胎
1108	1	2016030095	王崇芬	≥35	44	1	降调节方案	3	320.455	＞10天	11	＞3000	3525	HCG	3	3	1	原发不孕	0.07	＞24	25.8	混合因素	4	3.15	1412	0.65	0	17.83	2.92	81.75	4	2	9.5	A		0	0	0	0	0	0	0	是		未取到卵
965	1	C00004076	杨凤	≥35	45	2	降调节方案	3	600	＞10天	12	＞3000	7200	HCG	1	1	1	继发不孕	1.03	＞24	24.4	混合因素	4	5.74	1398	1.54	3	11.26	2.94	95.42	4	4	9.4	A	ICSI	2	0	0	0	0	0	0	是		无可移植胚胎
1478	1	2018040190	杨凤	≥35	44	1	拮抗剂方案	2	466.071	＞10天	14	＞3000	6525	HCG	1	1	1	继发不孕	0.31	＞24	24.4	混合因素	3	1.51	877	1.33	3	11.26	2.94	95.42	4	4	9.8	A	ICSI	3	0	2	1	0	0	0	否	否	全胚冷冻
1446	0	2017090084	邹静静	≥35	43	4	刺激方案	1	225	≤10天	8	≤3000	1800	HCG	3	3	1	继发不孕	0.18	≤24	22.1	女方因素	3	6.76	910	0.91	5	9.39	2.95	25.69	4	5	7.7	B	IVF	2	0	2	2	0	0	0	否	否	全胚冷冻
1827	0	2016070054	邹静静	≥35	42	2	刺激方案	1	247.5	≤10天	10	≤3000	2475	HCG	3	3	1	继发不孕	0.36	≤24	22.1	女方因素	2	0.76	497	0.35	2	9.39	2.95	25.69	4	5	9.5		IVF	2	0	2	0	0	0	0	否	否	全胚冷冻
1948	1	2017020182	邹静静	≥35	42	3	刺激方案	1	300	≤10天	5	≤3000	1500	HCG	3	3	1	继发不孕	0.30	≤24	22.1	女方因素	2	2.49	510	1.63	2	9.39	2.95	25.69	4	5	12.2	B	IVF	1	0	1	1	0	0	0	否	否	全胚冷冻
2083	0	2016040155	邹静静	≥35	42	1	降调节方案	3	225	≤10天	7	≤3000	1575	HCG	3	3	1	继发不孕	0.905	≤24	22.1	女方因素	1	2.82	510	0.32	1	9.39	2.95	25.69	4	5	10	A-B	IVF	1	0	1	0	0	0	0	否	否	全胚冷冻
1279	0	2017060128	房玉爱	≥35	38	1	降调节方案	3	150	≤10天	7	≤3000	1050	HCG	3	3	1	继发不孕	1.16	≤24	23.4	女方因素	3	5.91	852	0.08	3	12.05	2.96	38	4	7	15.8	A-B	IVF	3	0	3	3	2	2	0	否	是	移植	未妊娠
1385	0	2017110037	张彦芳	≥35	38	3	刺激方案	1	225	≤10天	8	≤3000	1800	HCG	3	2	0	继发不孕	0.56	≤24	23.3	女方因素	3	7.41	265	0.86	1	8.86	2.96	34.04	4	5	5.2	B	IVF	1	0	1	1	0	0	0	否	否	全胚冷冻
1866	0	2017040034	姜琰珺	≥35	42	2	刺激方案	1	150	≤10天	6	≤3000	900	HCG	7	0	0	原发不孕	0.92	＞24	28.5	不明原因	2	5.06	363	0.15	2	12.74	2.96	30	4	4	8.2	B	IVF	1	0	1	1	0	0	0	否	否	全胚冷冻
1611	0	C00016036	马丽丽	≥35	42	1	刺激方案	1	253.846	＞10天	13	＞3000	3300	HCG	4	3	1	继发不孕	0.76	≤24	20.2	混合因素	2	9.33	980	0.41	2	7.31	2.98	32.34	4	4	6.4	B-C	ICSI	0	0	0	0	0	0	0	是		无可移植胚胎
2178	0	C00005708	孔红霞	≥35	36	1	拮抗剂方案	2	180	≤10天	5	≤3000	900	双扳机	9	2	1	继发不孕	0.21	＞24	26	混合因素	1	3.24	308	0.28	1	9.3	2.98	41.75	4	5	9.4	A-B	ICSI	1	0	0	0	0	0	0	是		无可移植胚胎
2218	1	C00013242	韩金红	＜35	31	1	降调节方案	3	358.929	＞10天	14	＞3000	5025	HCG	3	0	0	原发不孕	0.28	＞24	27	女方因素	1	15.39	208	2.47		13	2.99	48	3	5	11.5	A-B		0	0	0	0	0	0	0	是		未取卵
1850	0	2016090191	张丽华	≥35	39	1	刺激方案	1	150	≤10天	8	≤3000	1200	HCG	2	2	1	继发不孕	0.94	＞24	28.3	混合因素	2	24.6	432	1.08		8.57	3.01	59	4	4	6	B		0	0	0	0	0	0	0	是		未取卵
2060	0	2017020035	张丽华	≥35	40	2	刺激方案	1	231.818	＞10天	11	≤3000	2550	HCG	3	2	1	继发不孕	0.32	＞24	28.3	混合因素	1	6.06	609	1.23	2	8.57	3.01	59	4	4	7.4	B	ICSI	2	0	2	1	0	0	0	否	否	全胚冷冻
1672	1	2017120121	朱红	≥35	48	1	拮抗剂方案	2	371.429	≤10天	7	≤3000	2600	HCG	2	2	1	继发不孕	0.36	＞24	26	男方因素	2	3.08	825	0.35	3	10.02	3.02	94	4	4	9.2	A	ICSI	2	0	1	0	1	1	0	否	是	移植	未妊娠
1767	0	C00009417	王昌燕	≥35	41	1	拮抗剂方案	2	150	≤10天	10	≤3000	1500	HCG	1	2	1	继发不孕	0.49	≤24	20.7	女方因素	2	3.03	603	0.46	3	11.1	3.02	33	4	7	9.6	A	IVF	3	0	3	1	2	2	0	否	是	移植	未妊娠
2163	0	C00019653	李春景	≥35	45	1	刺激方案	1	250	≤10天	7	≤3000	1750	双扳机	1	2	1	继发不孕	0.901	＞24	30.1	混合因素	1	15.66	337.39	1.06	0	12.46	3.03	64	4	2				0	0	0	0	0	0	0	是		未取到卵
329	1	C00010240	王红娟	≥35	44	2	刺激方案	1	300	≤10天	9	≤3000	2700	HCG	3	3	1	继发不孕	0.34	＞24	25	女方因素	7	15.95	2087	2.5	7	5.39	3.04	60.6	4	7	0.42	B	IVF	2	0	3	2	0	0	0	否	否	全胚冷冻
1861	0	C00006248	李慧	≥35	43	3	拮抗剂方案	2	187.5	≤10天	4	≤3000	750	双扳机	4	3	3	继发不孕	0.7	≤24	20.8	女方因素	2	4.53	376	0.49	1	9.57	3.05	44	4	4	7.9	A	IVF	1	0	1	0	0	0	0	否	否	全胚冷冻
1880	1	2016040057	吴士珍	≥35	48	1	降调节方案	3	326.786	≤10天	7	≤3000	2287.5	HCG	2	2	1	继发不孕	0.93	＞24	24.2	女方因素	2	3.73	629	1.21	4	8	3.05	91.75	4	5	9.6	B	IVF	1	0	0	0	0	0	0	是		无可移植胚胎
1902	1	C00016517	邹淑娟	≥35	44	1	刺激方案	1	300	＞10天	13	＞3000	3900	HCG	2	5	1	继发不孕	0.52	≤24	21	女方因素	2	7.35	516	0.97	1	10.76	3.05	21	4	6	0.58	B	IVF	1	0	1	0	0	0	0	否	否	全胚冷冻
1945	1	C00017992	邹淑娟	≥35	44	2	刺激方案	1	300	≤10天	9	≤3000	2700	HCG	2	5	1	继发不孕	0.32	≤24	21	女方因素	2	6.2	382	1.35	2	10.76	3.05	21	4	6	6.3	B	IVF	2	0	1	0	0	0	0	否	否	全胚冷冻
495	1	2018060089	张巧玲	≥35	45	1	刺激方案	1	422.727	＞10天	11	＞3000	4650	HCG	3	10	1	继发不孕	0.73	≤24	21.6	女方因素	6	7.39	2512	1.7	6	9.4	3.06	91	4	7	6.4	B	IVF	3	0	2	1	0	0	0	否	否	全胚冷冻
1040	1	2017030006	张玉玉	≥35	44	2	刺激方案	1	300	≤10天	9	≤3000	2700	HCG	8	1	1	继发不孕	1.13	≤24	21.7	女方因素	4	4.29	1109	0.7	5	14.6	3.06	66.06	4	6	9	A	IVF	2	0	1	0	0	0	0	否	否	全胚冷冻
1344	1	C00005111	张巧玲	≥35	46	2	刺激方案	1	383.333	≤10天	9	＞3000	3450	HCG	3	10	1	继发不孕	0.86	≤24	21.6	男方因素	3	9.39	614	1.62	4	9.4	3.06	41.75	4	7	3.4		ICSI	1	0	1	0	0	0	0	否	否	全胚冷冻
1479	1	C00011565	张巧玲	≥35	47	5	刺激方案	1	300	＞10天	12	＞3000	3600	HCG	3	10	1	继发不孕	0.54	≤24	21.6	男方因素	3	15.06	870	1.79	1	9.4	3.06	51.75	4	7	0.3		ICSI	2	0	1	0	0	0	0	否	否	全胚冷冻
2006	0	2017050109	张玉玉	≥35	45	3	刺激方案	1	150	≤10天	6	≤3000	900	HCG	8	1	1	继发不孕	0.98	≤24	21.7	女方因素	1	14.46	940	0.47	2	14.6	3.06	66.06	4	6	5.2	A	IVF	1	0	1	1	0	0	0	否	否	全胚冷冻
2045	0	C00012522	张巧玲	≥35	47	6	刺激方案	1	225	≤10天	9	≤3000	2025	HCG	3	10	1	继发不孕	0.26	≤24	21.6	女方因素	1	20.2	658	0.97	0	9.4	3.06	52	4	7	0.46	B-C		0	0	0	0	0	0	0	是		未取到卵
2142	1	2016050094	于艳艳	＜35	33	1	刺激方案	1	300	＞10天	12	＞3000	3600	HCG	3	2	1	继发不孕	0.98	≤24	21.7	女方因素	1	19.69	384	0.97	0	16.78	3.09	34.5	3	7	7.6	B		0	0	0	0	0	0	0	是		未取到卵
2154	0	2017020105	袁建青	≥35	42	1	刺激方案	1	150	≤10天	5	≤3000	750	HCG	4	1	1	继发不孕	0.76	＞24	24.4	混合因素	1	20.83	358	1.33		9.42	3.09	56	4	3	10.9	A		0	0	0	0	0	0	0	是		未取卵
947	0	C00015451	王广菊	≥35	45	1	拮抗剂方案	2	225	≤10天	10	≤3000	2250	HCG	2	2	2	继发不孕	0.97	＞24	27.6	女方因素	4	3.66	730	0.53	4	13.8	3.1	32	4	9	0.93	A	IVF	4	1	2	0	1	1	0	否	是	移植	未妊娠
1080	1	C00016430	刘议璐	＜35	30	1	刺激方案	1	300	≤10天	6	≤3000	1800	HCG	4	0	0	原发不孕	0.54	≤24	22	女方因素	4	8.82	1541	0.68	1	4.79	3.1	35.73	3	6	6.2	A-B	IVF	1	0	1	1	0	0	0	否	否	全胚冷冻
1676	1	2018070088	刘丽丽	≥35	36	2	刺激方案	1	375	≤10天	9	＞3000	3375	HCG	4	1	0	继发不孕	0.44	≤24	19.5	女方因素	2	20.39	815	2.78	2	7.8	3.1	35	4	6	10.9	B	IVF	2	0	2	0	0	0	0	否	否	全胚冷冻
1818	0	2016060118	张秀红	≥35	37	3	拮抗剂方案	2	225	≤10天	8	≤3000	1800	HCG	5	3	1	继发不孕	1.05	＞24	24.8	不明原因	2	0.82	511	3.98	2	12.37	3.11	91.75	4	6	9.7	B	IVF	1	0	2	0	0	0	0	否	否	全胚冷冻
2034	1	2016060159	范桂秀	≥35	36	4	刺激方案	1	390	＞10天	15	＞3000	5850	HCG	4	1	1	继发不孕	1.07	＞24	31.2	女方因素	1	6.22	690	0.94	1	9.67	3.11	41.75	4	5	8.1	B	IVF	0	0	0	0	0	0	0	是		未受精
2170	1	2016110192	范桂秀	≥35	36	5	刺激方案	1	450	≤10天	6	≤3000	2700	HCG	4	1	1	继发不孕	0.7	＞24	31.2	男方因素	1	4.12	323	1.07	1	8.59	3.11	91	4	5	10.4	A	ICSI	0	0	0	0	0	0	0	是		未受精
1703	0	C00011535	武文波	≥35	45	7	拮抗剂方案	2	196.154	＞10天	13	≤3000	2550	HCG	1	5	0	继发不孕	0.74	≤24	22.7	男方因素	2	5.67	748	0.7	1	10.54	3.14	48	4	3	0.56	A	ICSI	1	0	0	0	1	1	0	否	是	移植	未妊娠
1741	0	C00010489	武文波	≥35	44	6	刺激方案	1	195	≤10天	5	≤3000	975	HCG	1	5	0	继发不孕	0.23	≤24	22.7	男方因素	2	5.16	648	0.16	2	10.54	3.14	48	4	3	6.3	A	ICSI	2	0	1	0	1	1	0	否	是	移植	未妊娠
997	0	2016110274	范维红	≥35	43	1	刺激方案	1	283.333	≤10天	9	≤3000	2550	HCG	15	0	0	原发不孕	0.52	≤24	22.2	女方因素	4	5.34	1297	1.41	1	7.87	3.15	60	4	3	10.9	A-B	IVF	0	0	0	0	0	0	0	是		无可移植胚胎
1863	0	2018030299	王美萍	≥35	42	1	刺激方案	1	193.75	＞10天	12	≤3000	2325	HCG	2	2	1	继发不孕	0.16	＞24	27.3	女方因素	2	1.45	370	0.14	2	8.9	3.15	73.77	4	4	9.1	A	IVF	0	0	0	0	0	0	0	是		无可移植胚胎
2202	0	C00004998	高成霞	≥35	36	1	刺激方案	1	162.5	≤10天	6	≤3000	975	HCG	1	3	1	继发不孕	1.66	＞24	25.7	女方因素	1	11.11	256	0.39	1	9.12	3.15	70.1	4	4	3.5		IVF	1	0	1	1	0	0	0	否	否	全胚冷冻
800	0	2016080023	李宁	≥35	45	1	刺激方案	1	272.368	＞10天	19	＞3000	5175	HCG	1	0	0	继发不孕	0.81	≤24	22.6	女方因素	5	2.22	1624	1.99	4	5.71	3.17	50.1	4	5	8.2	A-B	IVF	3	0	2	0	0	0	0	否	否	全胚冷冻
1405	1	2016040183	刘宝桂	≥35	44	1	降调节方案	3	396.429	＞10天	14	＞3000	5550	HCG	12	1	1	继发不孕	0.86	＞24	24.4	女方因素	3	2.96	876	1	2	8.84	3.17	54	4	7	15.6	A-B	IVF	1	0	1	0	0	0	0	否	否	全胚冷冻
774	0	2016050125	潘玉红	≥35	42	1	刺激方案	1	262.5	≤10天	8	≤3000	2100	HCG	1	2	1	继发不孕	0.22	＞24	30	女方因素	5	4.68	1786	1.47	4	5.3	3.2	21	4	7			IVF	0	0	0	0	0	0	0	是		未受精
933	1	C00003409	马春燕	≥35	40	2	刺激方案	1	418.75	＞10天	12	＞3000	5025	HCG	2	2	1	继发不孕	0.865	＞24	27.5	女方因素	4	13.56	854	2.55	3	8.66	3.2	48.08	4	7	4.6	A	IVF	0	0	0	0	0	0	0	是		无可移植胚胎
670	1	2016090142	张慧	≥35	35	1	降调节方案	3	375	≤10天	10	＞3000	3750	HCG	4	0	0	原发不孕	0.48	＞24	27.8	男方因素	5	9.37	1354	1.86	2	7.35	3.21	80.1	4	5	9	A-B	ICSI	2	0	2	0	0	0	0	否	否	全胚冷冻
773	1	2017050225	张慧	≥35	35	3	降调节方案	3	412.5	≤10天	8	＞3000	3300	HCG	4	0	0	原发不孕	0.86	＞24	27.8	男方因素	5	1.59	1790	1.8	5	7.35	3.21	29.6	4	6	8.9	A	ICSI	4	0	4	2	2	2	0	否	是	移植	已妊娠	临床妊娠	宫内妊娠	单胎宫内妊娠
1035	1	C00012704	贾金红	≥35	43	1	刺激方案	1	330	≤10天	10	＞3000	3300	HCG	1	3	1	继发不孕	0.56	＞24	27.3	女方因素	4	4.15	1123	0.99	5	8.98	3.21	41	4	7	1.31	A-B	IVF	3	0	2	0	2	2	0	否	是	移植	未妊娠
1647	1	C00011870	王海敬	＜35	34	1	刺激方案	1	300	≤10天	10	≤3000	3000	HCG	7	1	1	继发不孕	0.23	≤24	18.8	女方因素	2	24.32	868	0.71	1	11.19	3.21	10	3	4	0.48	A-B	IVF	1	0	1	0	0	0	0	否	否	全胚冷冻
1669	1	C00019331	王海敬	≥35	36	7	刺激方案	1	300	≤10天	9	≤3000	2700	HCG	7	1	1	继发不孕	0.23	≤24	18.8	女方因素	2	21.75	829.57	1.29	1	11.19	3.21	10	4	4	5.3	B	IVF	1	0	1	0	0	0	0	否	否	全胚冷冻
1695	1	C00015741	王海敬	≥35	35	3	刺激方案	1	300	≤10天	6	≤3000	1800	HCG	7	1	1	继发不孕	0.23	≤24	18.8	女方因素	2	8.86	761	0.35	2	11.19	3.21	10	4	4	0.3		IVF	2	0	2	0	0	0	0	否	否	全胚冷冻
1904	1	C00017380	王海敬	≥35	35	4	刺激方案	1	300	≤10天	7	≤3000	2100	HCG	7	1	1	继发不孕	0.23	≤24	18.8	女方因素	2	8.74	511	0.7	3	11.19	3.21	10	4	4	0.67	A-B	IVF	1	0	0	0	0	0	0	是		无可移植胚胎
2280	1	2017050204	张春艳	＜35	32	5	降调节方案	3	303.704	＞10天	27	＞3000	8200	HCG	6	0	0	原发不孕	0.41	＞24	26.7	女方因素	1	2.51	235	1.31	0	8.98	3.21	41	3	3				0	0	0	0	0	0	0	是		未取到卵
1154	1	2017070151	葛锦秀	＜35	34	1	降调节方案	3	450	≤10天	10	＞3000	4500	HCG	5	0	0	继发不孕	1.12	＞24	27.3	混合因素	4	2.46	1244	0.85	3	7.86	3.22	42.42	3	5	8.7	A	ICSI	3	0	2	1	0	0	0	否	否	全胚冷冻
1883	0	C00013026	郭振花	≥35	37	1	刺激方案	1	200	≤10天	6	≤3000	1200	HCG	5	1	1	继发不孕	1.13	≤24	19.8	男方因素	2	19.88	248	1.17		7.14	3.22	39	4	4	1.09	A		0	0	0	0	0	0	0	是		未取卵
1885	0	2017060281	吴晓丽	≥35	42	1	刺激方案	1	192.857	≤10天	7	≤3000	1350	HCG	2	2	1	继发不孕	0.90	＞24	25.6	女方因素	6	10.73	1227	0.79	7	17.37	3.22	45.05	4	9	4	B	IVF	6	0	4	0	0	0	0	否	否	全胚冷冻
1316	1	C00009767	商玲	＜35	33	1	拮抗剂方案	2	359.091	＞10天	11	＞3000	3950	HCG	8	0	0	原发不孕	1.06	≤24	19.9	男方因素	3	3.53	717	0.35	3	7.12	3.23	30	3	8	10.9	A	ICSI	2	0	1	0	1	1	0	否	是	移植	未妊娠
1929	1	C00017078	刘玉玲	≥35	43	1	刺激方案	1	346.154	＞10天	13	＞3000	4500	HCG	3	2	0	继发不孕	1.10	≤24	24	女方因素	2	22.9	456	1.57	2	5.05	3.23	41	4	8	0.4	A	IVF	0	0	0	0	0	0	0	是		无可移植胚胎
2088	1	C00012566	于永梅	≥35	41	6	刺激方案	1	300	≤10天	7	≤3000	2100	HCG	17	0	0	原发不孕	0.42	＞24	27.3	女方因素	1	3.71	494	0.4	1	6.5	3.23	45.98	4	3	0.88	A	IVF	1	0	0	0	0	0	0	是		无可移植胚胎
2137	0	C00012777	田秀娟	＜35	32	1	拮抗剂方案	2	275	≤10天	6	≤3000	1650	HCG	2	2	1	继发不孕	0.78	＞24	31.3	男方因素	1	1.97	392	0.21	2	14.84	3.24	55	3	4	7.4	B	ICSI	2	0	2	0	2	2	0	否	是	移植	已妊娠	临床妊娠	宫内妊娠	单胎宫内妊娠
846	1	2016030209	藏忠华	≥35	38	1	刺激方案	1	300	≤10天	9	≤3000	2700	HCG	9	1	0	原发不孕	0.18	＞24	29.3	混合因素	5	11.52	1346	2.38		9.99	3.25	84.98	4	5	11.8	B		0	0	0	0	0	0	0	是		未取卵
1365	1	2016030325	丁玲玲	≥35	42	1	降调节方案	3	345	≤10天	10	＞3000	3450	HCG	1	3	1	继发不孕	0.85	＞24	28.1	女方因素	3	4.94	532	1.04	0	8.16	3.25	25.42	4	3	11.3	B		0	0	0	0	0	0	0	是		未取到卵
697	1	2017080171	崔永惠	≥35	44	2	刺激方案	1	300	≤10天	10	≤3000	3000	HCG	6	2	0	继发不孕	0.38	≤24	23.6	混合因素	5	9.61	1724	1.17	7	7.67	3.27	47.71	4	8	5	A	ICSI	3	0	0	0	0	0	0	是		无可移植胚胎
1787	0	2017090021	孙猛猛	＜35	27	1	刺激方案	1	225	＞10天	16	＞3000	3600	双扳机	5	0	0	原发不孕	0.87	＞24	26.3	女方因素	2	12.96	569	1.07	1	8.99	3.27	47	3	5	8	B-C	IVF	2	0	2	0	0	0	0	否	否	全胚冷冻
2253	0	2018040267	王同艳	≥35	45	3	刺激方案	1	186.364	＞10天	11	≤3000	2050	HCG	1	2	1	继发不孕	0.22	≤24	22.3	女方因素	1	7.05	298	0.42	1	13.28	3.27	44	4	5	7.3		IVF	0	0	0	0	0	0	0	是		未受精
1687	0	2017030293	杨红霞	≥35	38	1	刺激方案	1	225	≤10天	7	≤3000	1575	HCG	2	1	1	继发不孕	0.42	＞24	26.6	女方因素	2	18.32	778	1.39	1	12.12	3.28	95	4	4	7.9	A-B	IVF	0	0	0	0	0	0	0	是		未受精
1786	0	2017050142	杨红霞	≥35	38	2	刺激方案	1	150	≤10天	7	≤3000	1050	HCG	2	1	1	继发不孕	0.44	＞24	26.6	女方因素	2	13.2	570	0.9	3	6.12	3.28	50.5	4	6	7	A-B	IVF	3	0	2	1	0	0	0	否	否	全胚冷冻
1828	0	2017120071	熊巩莹	＜35	27	4	刺激方案	1	257.143	＞10天	14	＞3000	3600	HCG	4	1	0	继发不孕	1.18	＞24	27.1	女方因素	2	3.09	494	0.18	0	7.29	3.29	42	3	5	5.3	B-C		0	0	0	0	0	0	0	是		未取到卵
2094	0	2017060045	赫玉娥	≥35	45	1	刺激方案	1	131.25	≤10天	8	≤3000	1050	HCG	1	3	1	继发不孕	0.29	≤24	23.4	女方因素	1	20.48	484	0.46		8.81	3.29	38	4	3	11.2	A		0	0	0	0	0	0	0	是		未取卵
1872	0	2016020163	牛红霞	≥35	45	3	降调节方案	3	172.5	≤10天	10	≤3000	1725	HCG	2	2	1	继发不孕	0.01	＞24	26.6	女方因素	2	37.24	348	1.59	1	14.92	3.31	26	4	2	11.5	A-B	IVF	1	0	1	0	0	0	0	否	否	全胚冷冻
520	1	C00007176	武广梅	≥35	47	1	刺激方案	1	375	＞10天	12	＞3000	4500	HCG	5	2	1	继发不孕	0.88	＞24	25.4	女方因素	6	25.42	2235	2.23	4	12.84	3.32	21	4	7	0.45	B	IVF	1	0	1	0	0	0	0	否	否	全胚冷冻
1740	0	C00004039	刘金华	≥35	41	1	刺激方案	1	262.5	≤10天	4	≤3000	1050	HCG	2	4	1	继发不孕	0.15	≤24	22.6	男方因素	2	27.91	649	1.16	1	11.11	3.32	53.09	4	2	7.3	B	ICSI	0	0	1	0	0	0	0	否	否	全胚冷冻
2193	0	2017010074	魏玉凤	≥35	40	1	降调节方案	3	150	≤10天	9	≤3000	1350	HCG	1	4	1	继发不孕	0.40	＞24	30.8	女方因素	1	5.13	275	0.07	2	5.63	3.32	99.86	4	3	10.2	A	IVF	1	0	1	1	0	0	0	否	否	全胚冷冻
2222	0	C00003669	郑爱芝	≥35	42	2	拮抗剂方案	2	255	≤10天	5	≤3000	1275	双扳机	3	2	1	继发不孕	0.53	＞24	29.7	女方因素	1	8.72	196	0.24	1	13.18	3.32	27	4	2	6.5	A	IVF	1	0	1	0	0	0	0	否	否	全胚冷冻
1412	0	2018030100	满红铃	≥35	44	3	拮抗剂方案	2	248.077	＞10天	13	＞3000	3225	HCG	3	1	1	继发不孕	0.16	≤24	23.4	女方因素	3	4.59	856	1.1	2	7.99	3.33	40	4	7	9.5	A-B	IVF	2	0	0	0	0	0	0	是		无可移植胚胎
1722	0	2017090282	满红铃	≥35	44	2	刺激方案	1	237.5	＞10天	12	≤3000	2850	HCG	3	1	1	继发不孕	0.57	≤24	23.4	不明原因	2	8.45	707	1	2	7.99	3.33	40	4	7	8.9	A	IVF	1	0	1	1	1	1	0	否	是	移植	未妊娠
2073	0	2017070080	满红铃	≥35	43	1	降调节方案	3	225	≤10天	9	≤3000	2025	HCG	3	1	1	继发不孕	1.1	≤24	23.4	不明原因	1	15.4	557	0.29		7.99	3.33	80.1	4	7	9.4	A-B		0	0	0	0	0	0	0	是		未取卵
896	1	C00004146	孙翠青	≥35	38	1	降调节方案	3	352.5	≤10天	10	＞3000	3525	HCG	1	4	1	继发不孕	1.1	＞24	26.6	女方因素	5	0.75	1051	0.44	5	9.42	3.35	47.5	4	7	11.5	A	IVF	3	0	1	0	0	0	0	否	否	全胚冷冻
1281	0	C00004377	孙翠青	≥35	38	2	刺激方案	1	150	≤10天	10	≤3000	1500	HCG	1	4	1	继发不孕	1.10	＞24	26.6	男方因素	3	4.45	846	0.39	4	9.42	3.35	47.5	4	7	0.48	A	ICSI	4	0	3	0	0	0	0	否	否	全胚冷冻
1640	1	C00005852	贾兰	≥35	43	1	拮抗剂方案	2	300	≤10天	7	≤3000	2100	双扳机	11	3	1	继发不孕	1.12	≤24	20.8	女方因素	2	4.29	889	0.32	2	5.44	3.36	10	4	6	10.4	A	IVF	1	0	1	0	1	1	0	否	是	移植	未妊娠
1252	1	2016060266	任晓梅	≥35	46	1	刺激方案	1	375	≤10天	8	≤3000	3000	HCG	6	3	1	继发不孕	0.62	≤24	23.4	女方因素	3	4	905	0.88	2	6.96	3.37	99.86	4	4	8.1	A	IVF	2	0	1	0	1	1	0	否	是	移植	未妊娠
2229	0	2017030333	李梅	≥35	44	1	降调节方案	3	225	≤10天	6	≤3000	1350	HCG	3	0	0	继发不孕	0.77	＞24	28.4	女方因素	1	28.7	168	1.22		7.05	3.37	69	4	3	11.1	A		0	0	0	0	0	0	0	是		未取卵
892	1	2016120092	屈金杰	≥35	41	1	刺激方案	1	347.727	＞10天	11	＞3000	3825	HCG	5	3	2	继发不孕	0.19	＞24	24.3	女方因素	5	3.39	1060	1.09	4	12.66	3.38	40	4	5	12.3	A	IVF	4	0	2	1	2	2	0	否	是	移植	未妊娠
1009	1	2017040009	李贤芸	≥35	40	1	刺激方案	1	334.091	＞10天	11	＞3000	3675	HCG	3	6	1	继发不孕	0.668	＞24	29.3	女方因素	4	8.82	1234	1.34	4	8.61	3.38	40.09	4	6	5.5	B	IVF	2	0	1	0	0	0	0	否	否	全胚冷冻
1260	1	C00011846	赵淑侠	≥35	49	2	拮抗剂方案	2	395.455	＞10天	11	＞3000	4350	双扳机	1	1	1	继发不孕	0.56	＞24	31.6	女方因素	3	3.08	888	0.25	2	4.66	3.38	55	4	7	15.9	B	IVF	2	0	1	0	1	1	0	否	是	移植	未妊娠
1422	1	C00016055	罗玉林	≥35	40	3	拮抗剂方案	2	356.25	＞10天	12	＞3000	4275	HCG	2	4	1	继发不孕	0.87	≤24	23	混合因素	3	4.77	974	0.87	5	8.61	3.38	40.09	4	5			ICSI	5	0	2	0	2	2	0	否	是	移植	已妊娠	临床妊娠	宫内妊娠	单胎宫内妊娠
1508	1	C00009299	赵淑侠	≥35	48	1	刺激方案	1	300	＞10天	11	＞3000	3300	HCG	1	1	1	继发不孕	0.58	＞24	31.6	女方因素	3	7.7	890	0.46	5	4.66	3.38	55	4	7	10.9	B	IVF	3	0	2	0	0	0	0	否	否	全胚冷冻
2087	0	C00017320	刘齐齐	≥35	45	1	拮抗剂方案	2	150	≤10天	9	≤3000	1350	HCG	3	2	1	继发不孕	0.48	≤24	23.8	混合因素	1	16.56	495.35	0.3		14.75	3.38	37	4	3	13	B		0	0	0	0	0	0	0	是		未取卵
2196	0	C00015289	罗玉林	≥35	40	2	拮抗剂方案	2	100	≤10天	6	≤3000	600	HCG	2	4	1	继发不孕	0.36	≤24	23	混合因素	1	6.83	270	0.71	1	8.61	3.38	40.09	4	5	8	A	ICSI	1	0	1	1	1	1	0	否	是	移植	未妊娠
1400	1	C00010436	史建叶	≥35	38	3	刺激方案	1	450	＞10天	11	＞3000	4950	HCG	1	3	0	继发不孕	0.42	≤24	23.3	女方因素	3	23.17	884	1.42	1	7.01	3.39	46.81	4	5	0.45	B	IVF	1	0	1	0	0	0	0	否	否	全胚冷冻
1554	1	C00005965	史建叶	≥35	38	1	拮抗剂方案	2	328.125	≤10天	8	≤3000	2625	HCG	1	3	0	继发不孕	0.427	≤24	23.3	女方因素	3	6.4	1148	3.75	1	7.01	3.39	77	4	5	3.9	A-B	IVF	1	0	1	1	0	0	0	否	否	全胚冷冻
1800	1	2016080138	汲君	≥35	46	3	刺激方案	1	300	＞10天	11	＞3000	3300	HCG	3	3	0	继发不孕	0.48	≤24	21.4	女方因素	2	5.69	540	0.51	3	6.66	3.39	105	4	3	5	B-C	IVF	2	0	2	2	0	0	0	否	否	全胚冷冻
1965	1	C00006413	史建叶	≥35	38	2	拮抗剂方案	2	375	≤10天	5	≤3000	1875	HCG	1	3	0	继发不孕	0.2	≤24	23.3	女方因素	2	3.02	470	0.41	3	7.01	3.39	77	4	5	3.4	B	IVF	3	0	0	0	0	0	0	是		无可移植胚胎
1995	1	C00011583	史建叶	≥35	39	5	刺激方案	1	300	≤10天	8	≤3000	2400	HCG	1	3	0	继发不孕	0.66	≤24	23.3	女方因素	2	12.52	497	1.4	2	7.01	3.39	67	4	5	9.2	A	IVF	1	0	1	0	0	0	0	否	否	全胚冷冻
1276	0	2018020057	辛丽	≥35	36	2	降调节方案	3	225	＞10天	13	≤3000	2925	HCG	2	3	1	继发不孕	1.1	≤24	20.9	女方因素	3	5.87	856	0.89	0	8.78	3.4	34.76	4	6	1.22	A-B		0	0	0	0	0	0	0	是		未取到卵
1748	1	2017040197	张一蕾	≥35	44	4	降调节方案	3	352.273	＞10天	11	＞3000	3875	HCG	3	6	1	继发不孕	0.806	≤24	21.5	混合因素	2	2.06	633	0.69	3	11.58	3.41	77.07	4	4	9.8	A-B	ICSI	1	0	0	0	0	0	0	是		无可移植胚胎
2157	1	2016100004	张一蕾	≥35	43	1	刺激方案	1	308.333	≤10天	9	≤3000	2775	HCG	3	6	1	继发不孕	0.23	≤24	21.5	混合因素	1	12.14	352	1.68	3	11.58	3.41	77.07	4	4	8.4	A-B	ICSI	1	0	1	0	0	0	0	否	否	全胚冷冻
2161	1	2016110085	张一蕾	≥35	43	2	刺激方案	1	450	≤10天	9	＞3000	4050	HCG	3	6	1	继发不孕	0.79	≤24	21.5	混合因素	1	17.48	339	1.09	1	11.58	3.41	77.07	4	4	9.4	B	ICSI	1	0	1	0	0	0	0	否	否	全胚冷冻
2123	0	C00013583	柳雅	≥35	42	6	刺激方案	1	150	＞10天	13	≤3000	1950	HCG	16	0	0	原发不孕	0.468	＞24	28.6	混合因素	1	11.35	426	0.29	2	9.46	3.42	39	4	4	9.7	C	ICSI	0	0	0	0	0	0	0	是		无可移植胚胎
2272	1	C00011921	柳雅	≥35	42	5	刺激方案	1	403.125	＞10天	16	＞3000	6450	HCG	16	0	0	原发不孕	0.14	＞24	28.6	混合因素	2	2.43	412	0.72	2	9.46	3.42	39	4	4			ICSI	1	0	0	0	0	0	0	是		无可移植胚胎
948	0	C00019154	张秀华	≥35	46	1	拮抗剂方案	2	281.25	≤10天	8	≤3000	2250	HCG	17	3	0	继发不孕	0.58	＞24	27.2	混合因素	4	1.38	728.36	0.54	4	7.3	3.44	23	4	8	10.6	A	ICSI	2	0	2	1	2	2	0	否	是	移植	未妊娠
1125	1	2016040230	侯延芬	≥35	44	5	刺激方案	1	450	≤10天	9	＞3000	4050	HCG	6	3	2	继发不孕	0.26	＞24	26.9	女方因素	4	2.71	1361	0.49	3	14.72	3.44	81	4	4	6	B	IVF	3	0	2	0	0	0	0	否	否	全胚冷冻
2017	1	C00008460	张华	≥35	44	1	刺激方案	1	300	≤10天	9	≤3000	2700	HCG	19	0	0	原发不孕	0.20	＞24	27.9	女方因素	1	11.25	788	0.27	2	12.55	3.44	10	4	4	0.68	B	IVF	2	0	0	0	0	0	0	是		无可移植胚胎
741	1	C00005695	张忠英	≥35	44	1	刺激方案	1	420	≤10天	10	＞3000	4200	双扳机	2	2	1	继发不孕	0.38	≤24	19.1	女方因素	5	4.72	1439	1.35	3	7.98	3.45	66	4	7	9.8	A	IVF	1	0	1	1	0	0	0	否	否	全胚冷冻
1315	1	C00008745	丁洁	＜35	30	2	降调节方案	3	293.75	＞10天	12	＞3000	3525	HCG	3	1	0	继发不孕	1.03	≤24	20.5	女方因素	3	0.69	723	0.36	2	8.59	3.45	62	3	6	1.08	A	IVF	0	0	0	0	0	0	0	是		无可移植胚胎
1390	0	C00008947	柳雅	≥35	41	3	刺激方案	1	150	＞10天	12	≤3000	1800	双扳机	16	0	0	原发不孕	1.09	＞24	28.6	混合因素	3	6.39	904	0.41	3	8.94	3.45	32	4	4	8.8	A-B	ICSI	2	0	1	0	0	0	0	否	否	全胚冷冻
1681	0	C00006314	柳雅	≥35	41	1	刺激方案	1	245.455	＞10天	11	≤3000	2700	HCG	16	0	0	原发不孕	0.14	＞24	28.6	混合因素	2	7.58	793	0.11	1	8.94	3.45	32	4	4	7.2		ICSI	1	0	1	0	0	0	0	否	否	全胚冷冻
2172	0	2018030276	袁利娟	≥35	36	1	刺激方案	1	168.75	≤10天	4	≤3000	675	HCG	3	2	1	继发不孕	0.65	≤24	23	混合因素	1	4.82	321	0.36	0	8.98	3.45	45.76	4	5	8.8	B		0	0	0	0	0	0	0	是		未取到卵
1036	0	2017100166	李秀亭	≥35	46	1	刺激方案	1	225	≤10天	8	≤3000	1800	HCG	2	2	0	继发不孕	0.54	≤24	21.2	女方因素	4	4.57	1122	0.92	3	11.48	3.46	21	4	6	8	B	IVF	0	0	0	0	0	0	0	是		未受精
1076	0	2017070004	段芳芳	＜35	34	3	刺激方案	1	150	≤10天	9	≤3000	1350	HCG	3	3	1	继发不孕	0.47	≤24	24	女方因素	4	6.66	1561	0.86		11.33	3.46	43	3	4	7.2	A		0	0	0	0	0	0	0	是		未取卵
1915	0	2017030287	熊巩莹	＜35	27	1	刺激方案	1	225	≤10天	8	≤3000	1800	HCG	4	1	0	继发不孕	1.1	＞24	27.1	女方因素	2	3.14	490	0.52	1	11.33	3.46	43	3	5	5	A	IVF	1	0	1	0	0	0	0	否	否	全胚冷冻
2061	1	2017040122	段芳芳	＜35	34	1	降调节方案	3	291.667	≤10天	9	≤3000	2625	HCG	3	3	1	继发不孕	0.99	≤24	24	女方因素	1	18.92	605	0.5	2	11.33	3.46	43	3	4	9.8	B	IVF	0	0	0	0	0	0	0	是		无可移植胚胎
2071	0	2016030213	尹芳	＜35	31	2	刺激方案	1	216.667	≤10天	9	≤3000	1950	HCG	1	1	0	继发不孕	0.64	≤24	20.5	女方因素	1	15.37	560	0.94	0	11.33	3.46	43	3	4	4	A-B		0	0	0	0	0	0	0	是		未取到卵
1322	1	C00016065	高丽娜	≥35	36	1	拮抗剂方案	2	300	≤10天	7	≤3000	2100	HCG	3	2	0	继发不孕	0.47	＞24	26	女方因素	3	8.06	689	0.6	3	11.49	3.49	58	4	6	11.6	A	IVF	2	0	1	0	1	1	0	否	是	移植	未妊娠
1834	1	2016120160	时新萃	≥35	46	2	刺激方案	1	300	≤10天	7	≤3000	2100	HCG	5	3	2	继发不孕	0.09	＞24	29.3	女方因素	2	4.84	480	1.05	2	19.26	3.49	99.09	4	2	8.5	A-B	IVF	1	0	1	0	0	0	0	否	否	全胚冷冻
1852	0	2016110253	时新萃	≥35	46	1	刺激方案	1	266.667	≤10天	9	≤3000	2400	HCG	5	3	2	继发不孕	0.11	＞24	29.3	女方因素	2	2.95	417	1.17	1	19.26	3.49	99.09	4	2	8.9	A-B	IVF	1	0	1	0	0	0	0	否	否	全胚冷冻
1877	0	2016040223	李婷	≥35	45	4	拮抗剂方案	2	278.571	≤10天	7	≤3000	1950	HCG	1	3	1	继发不孕	0.26	≤24	21.4	不明原因	2	2.32	292	0.08	1	14.78	3.49	25.42	4	2	7	B	IVF	1	0	1	0	0	0	0	否	否	全胚冷冻
1949	0	C00009928	贾秀萍	≥35	38	4	刺激方案	1	150	≤10天	8	≤3000	1200	双扳机	2	2	1	继发不孕	0.91	≤24	21.3	女方因素	2	9.73	509	0.74	2	10.8	3.49	78	4	5	5.3	A-B	IVF	2	0	2	2	0	0	0	否	否	全胚冷冻
2004	0	C00010242	贾秀萍	≥35	38	5	刺激方案	1	214.286	≤10天	7	≤3000	1500	双扳机	2	2	1	继发不孕	0.9	≤24	21.3	女方因素	1	15.26	961	0.67	3	10.8	3.49	78	4	4	0.5		IVF	0	0	0	0	0	0	0	是		无可移植胚胎
2247	0	C00010452	周静	≥35	47	3	刺激方案	1	250	≤10天	7	≤3000	1750	HCG	3	3	0	继发不孕	0.836	≤24	19.5	女方因素	1	12.88	465.78	0.82	2	19.78	3.49	78	4	4	5.1	B	IVF	1	0	1	0	0	0	0	否	否	全胚冷冻
931	1	2017110132	王玉影	≥35	43	1	刺激方案	1	337.5	＞10天	12	＞3000	4050	HCG	3	3	1	继发不孕	0.33	≤24	22.3	混合因素	4	17.98	860	1.64	4	5.93	3.5	67.09	4	5	5	C	ICSI	3	0	2	0	0	0	0	否	否	全胚冷冻
995	0	2017060284	胡小凤	≥35	48	2	刺激方案	1	150	≤10天	7	≤3000	1050	HCG	2	2	2	继发不孕	0.49	≤24	22.4	混合因素	4	4.89	1303	1.43	4	7.12	3.5	46.43	4	8	10.2	A	ICSI	2	0	1	0	0	0	0	否	否	全胚冷冻
1117	0	2016120095	胡小凤	≥35	47	1	刺激方案	1	200	≤10天	6	≤3000	1200	HCG	2	2	2	继发不孕	0.53	≤24	22.4	混合因素	4	5.64	1390	2.1	4	7.12	3.5	46.43	4	8	7.7	A-B	ICSI	2	0	2	0	0	0	0	否	否	全胚冷冻
1475	1	2016030237	吴香云	≥35	40	5	拮抗剂方案	2	450	≤10天	9	＞3000	4050	HCG	14	1	0	继发不孕	0.67	≤24	23.6	女方因素	3	2.17	886	1.39	3	9.89	3.5	35.23	4	5	9.6	A	IVF	3	0	1	1	1	1	0	否	是	移植	未妊娠
864	0	C00004365	李凤娟	≥35	43	1	刺激方案	1	150	≤10天	7	≤3000	1050	HCG	2	0	0	原发不孕	0.39	≤24	22.1	女方因素	5	8.53	1237	1.38	3	9.77	3.51	32.76	4	6	12	B	IVF	2	0	2	1	0	0	0	否	否	全胚冷冻
1356	0	C00005423	耿雪	＜35	31	7	拮抗剂方案	2	250	≤10天	9	≤3000	2250	双扳机	3	1	0	继发不孕	0.45	≤24	19	女方因素	3	0.9	554	0.79	3	7.32	3.51	76.43	3	5	10	A-B	IVF	1	0	1	1	1	1	0	否	是	移植	已妊娠	临床妊娠	宫内妊娠	单胚胎停
1674	1	2016060163	耿雪	＜35	27	2	刺激方案	1	300	≤10天	7	≤3000	2100	HCG	3	0	0	原发不孕	0.27	≤24	19	女方因素	2	7.14	818	0.76	2	7.32	3.51	66.43	3	5	6.4	A-B	IVF	2	0	2	0	0	0	0	否	否	全胚冷冻
1897	0	2017040183	耿雪	＜35	28	4	刺激方案	1	150	≤10天	9	≤3000	1350	HCG	3	0	0	原发不孕	0.89	≤24	19	女方因素	2	7.56	886	1.15	3	7.32	3.51	91	3	5	6.2	B	IVF	3	0	3	2	0	0	0	否	否	全胚冷冻
1907	1	2017090156	耿雪	＜35	28	5	刺激方案	1	300	≤10天	9	≤3000	2700	HCG	3	1	0	继发不孕	1.03	≤24	19	女方因素	2	10.52	509	0.27	2	7.32	3.51	66.43	3	5	4.6	A	IVF	2	0	2	0	0	0	0	否	否	全胚冷冻
1971	1	2017030041	史建平	≥35	41	1	降调节方案	3	450	≤10天	10	＞3000	4500	HCG	2	5	1	继发不孕	0.63	＞24	25	混合因素	2	0.58	456	0.78	4	7.5	3.51	93	4	5	14.7	A	ICSI	3	0	2	1	2	2	0	否	是	移植	未妊娠
2234	0	C00003538	耿雪	＜35	30	6	降调节方案	3	252.273	＞10天	11	≤3000	2775	HCG	3	1	0	继发不孕	0.50	≤24	19	女方因素	1	0.41	138	0.29	1	7.32	3.51	86.43	3	3	9.4	A	IVF	1	0	1	0	1	1	0	否	是	移植	未妊娠
1796	1	C00010960	巩守霞	≥35	42	1	拮抗剂方案	2	314.062	≤10天	8	≤3000	2512.5	双扳机	1	5	1	继发不孕	0.95	≤24	23.2	女方因素	2	3.02	546	0.25	2	11.4	3.52	48	4	7	10	A	IVF	0	0	0	0	0	0	0	是		未受精
1932	1	2017020203	周春玲	≥35	43	2	刺激方案	1	300	≤10天	8	≤3000	2400	HCG	13	5	2	继发不孕	0.7	＞24	24.2	女方因素	2	4.76	439	0.62	2	9.26	3.52	40.1	4	4	12.7	B	IVF	2	0	2	0	0	0	0	否	否	全胚冷冻
1988	1	2016120031	周春玲	≥35	43	1	刺激方案	1	316.667	≤10天	9	≤3000	2850	HCG	13	5	2	继发不孕	0.41	＞24	24.2	女方因素	2	6.26	406	0.43	1	9.26	3.52	90.1	4	4	12.8	B-C	IVF	1	0	1	1	0	0	0	否	否	全胚冷冻
1164	1	2018040187	杨金红	≥35	41	2	刺激方案	1	300	≤10天	10	≤3000	3000	HCG	3	4	1	继发不孕	0.88	≤24	21.8	不明原因	4	0.9	1205	0.48	3	8.72	3.53	73	4	4	7	A-B	IVF	2	0	0	0	0	0	0	是		无可移植胚胎
1421	0	2017110012	杨金红	≥35	41	1	刺激方案	1	275	＞10天	12	＞3000	3300	HCG	3	4	1	继发不孕	0.17	≤24	21.8	不明原因	3	7.77	974	0.39	1	8.72	3.53	73	4	4	6.3	A-B	IVF	1	0	0	0	0	0	0	是		无可移植胚胎
2000	1	2016010014	陈宗英	≥35	40	2	刺激方案	1	318.75	＞10天	16	＞3000	5100	HCG	2	5	0	继发不孕	0.479	＞24	27.3	男方因素	2	11.24	486	0.49	3	14.23	3.56	19	4	6	4	B	ICSI	3	0	2	0	0	0	0	否	否	全胚冷冻
974	1	2016050226	魏彦丽	≥35	45	1	刺激方案	1	293.182	＞10天	11	＞3000	3225	HCG	5	2	1	继发不孕	1.09	≤24	20.5	女方因素	4	15.96	1369	2.25	6	8.77	3.57	45.42	4	9	7	A-B	IVF	0	0	0	0	0	0	0	是		未受精
1435	0	C00003729	梁爱华	≥35	41	1	刺激方案	1	225	≤10天	9	≤3000	2025	HCG	1	2	1	继发不孕	0.75	＞24	25.7	混合因素	3	14.72	941	1.03	2	12.4	3.57	55	4	5	0.72	B	ICSI	2	0	2	1	0	0	0	否	否	全胚冷冻
1492	1	C00010134	陈慧勤	＜35	31	1	拮抗剂方案	2	500	＞10天	15	＞3000	7500	双扳机	1	0	0	原发不孕	1.1	≤24	23.4	女方因素	3	1.04	804	0.39	4	6.79	3.57	38	3	7	14	B	IVF	2	0	1	1	1	1	0	否	是	移植	未妊娠
1530	0	C00016173	杨俊玲	≥35	40	1	拮抗剂方案	2	281.25	≤10天	8	≤3000	2250	HCG	8	2	0	继发不孕	0.28	≤24	20.9	女方因素	3	3.18	1237	1.03	3	8.08	3.57	26.43	4	5	12.6	A	IVF	3	0	2	1	2	2	0	否	是	移植	已妊娠	临床妊娠	宫外妊娠	异位妊娠
1692	1	C00006427	梁爱华	≥35	42	2	刺激方案	1	416.667	≤10天	9	＞3000	3750	HCG	1	2	1	继发不孕	0.73	＞24	25.7	混合因素	2	11.84	769	0.79	3	12.4	3.57	55	4	7	0.53	B	ICSI	2	0	2	0	0	0	0	否	否	全胚冷冻
1200	1	C00018106	刘海霞	＜35	31	1	拮抗剂方案	2	300	≤10天	9	≤3000	2700	HCG	1	0	0	原发不孕	1.16	≤24	23	男方因素	4	1.12	1050.15	0.93	4	6.05	3.59	28.09	3	5	12.8	A	ICSI	4	0	2	0	2	2	0	否	是	移植	未妊娠
1643	0	C00015715	杜君霞	＜35	33	1	刺激方案	1	202.5	≤10天	10	≤3000	2025	HCG	2	0	0	原发不孕	0.57	≤24	20	混合因素	2	15.87	883	2.98	0	13.63	3.59	17	3	5				0	0	0	0	0	0	0	是		未取到卵
1696	0	2017030075	张华敏	≥35	39	1	降调节方案	3	225	≤10天	8	≤3000	1800	HCG	2	0	0	继发不孕	0.39	≤24	20.9	女方因素	2	1.89	761	0.18	2	9.26	3.59	43	4	5	10.7	B	IVF	2	0	2	0	2	2	0	否	是	移植	已妊娠	临床妊娠	宫内妊娠	单胚胎停
1891	1	C00016958	金晓红	≥35	39	1	刺激方案	1	300	≤10天	9	≤3000	2700	HCG	1	2	2	继发不孕	0.40	＞24	29.4	女方因素	2	7.28	305	0.76	1	9.26	3.59	43	4	5	0.58	B	IVF	1	0	1	0	0	0	0	否	否	全胚冷冻
1928	1	2017030056	陈明霞	≥35	45	1	降调节方案	3	300	≤10天	8	≤3000	2400	HCG	1	5	2	继发不孕	0.92	≤24	22.9	混合因素	2	3.97	456.45	0.5	2	6.94	3.59	41	4	10	9.5	A	ICSI	2	0	0	0	0	0	0	是		无可移植胚胎
2182	0	C00018489	金晓红	≥35	39	2	刺激方案	1	150	≤10天	7	≤3000	1050	HCG	1	2	2	继发不孕	0.43	＞24	29.4	女方因素	1	4.73	303.83	1.78	0	9.26	3.59	43	4	5	5.4	B-C		0	0	0	0	0	0	0	是		未取到卵
1449	1	2016070177	赵健玲	≥35	41	1	刺激方案	1	300	≤10天	9	≤3000	2700	HCG	3	1	1	继发不孕	0.4	＞24	26.3	女方因素	3	3.81	904	1.49	3	8.2	3.6	59.09	4	7	8.6	A	IVF	0	0	0	0	0	0	0	是		无可移植胚胎
1657	0	2017030239	赵健玲	≥35	42	2	刺激方案	1	275	＞10天	12	＞3000	3300	HCG	3	1	1	继发不孕	1.12	＞24	26.3	混合因素	2	4.16	848	1.15	0	8.2	3.6	59.09	4	5	8	B		0	0	0	0	0	0	0	是		未取到卵
2095	0	2016090129	孙小淋	＜35	32	3	拮抗剂方案	2	225	≤10天	8	≤3000	1800	HCG	3	1	1	继发不孕	0.76	≤24	18.5	女方因素	1	3.69	483	1.98	1	9.62	3.63	43	3	3	12.6	A	IVF	0	0	0	0	0	0	0	是		未受精
854	0	C00015837	任玉翠	≥35	42	2	拮抗剂方案	2	288.462	＞10天	13	＞3000	3750	HCG	4	2	1	继发不孕	0.92	＞24	27.6	女方因素	5	5.25	1291	0.93	3	12.93	3.65	38	4	7	13.4	B	IVF	1	0	1	0	1	1	0	否	是	移植	未妊娠
1042	1	2016040031	张民	≥35	42	5	降调节方案	3	558.929	＞10天	14	＞3000	7825	HCG	9	1	1	继发不孕	0.42	≤24	19.5	混合因素	4	2.7	1784	1.28	2	15.37	3.65	18	4	3	11.5	B	ICSI	2	0	1	0	0	0	0	否	否	全胚冷冻
1078	1	2016040302	张民	≥35	42	6	降调节方案	3	387.5	≤10天	6	≤3000	2325	HCG	9	1	1	继发不孕	0.72	≤24	19.5	混合因素	4	7.59	1560	0.75	2	14.23	3.65	18	4	3	4.3		ICSI	1	0	1	0	0	0	0	否	否	全胚冷冻
1645	0	C00018699	杨俊玲	≥35	40	2	拮抗剂方案	2	225	≤10天	7	≤3000	1575	HCG	1	3	0	继发不孕	0.26	≤24	20.9	女方因素	2	7.9	873.76	0.35	2	10.77	3.65	35	4	5	12.7	A	IVF	1	0	1	1	1	1	0	否	是	移植	未妊娠
1712	1	C00016405	任玉翠	≥35	42	3	降调节方案	3	300	≤10天	8	≤3000	2400	HCG	4	2	1	继发不孕	1.03	＞24	27.6	混合因素	2	3.35	727	0.42	4	12.93	3.65	38	4	7	12	A-B	ICSI	3	0	0	0	0	0	0	是		无可移植胚胎
1821	1	2016090072	张民	≥35	43	7	降调节方案	3	375	≤10天	6	≤3000	2250	HCG	9	1	1	继发不孕	0.72	≤24	19.5	混合因素	2	5.46	509	0.87	2	14.23	3.65	18	4	3	4.7		ICSI	2	0	1	0	0	0	0	否	否	全胚冷冻
1173	0	2018070091	王芬	＜35	29	3	刺激方案	1	241.667	≤10天	9	≤3000	2175	HCG	5	0	0	原发不孕	0.52	≤24	21.1	男方因素	4	13.25	1159	1.36	3	6.9	3.67	42.91	3	5	6	B-C	ICSI	0	0	0	0	0	0	0	是		无可移植胚胎
1321	0	C00012985	李九荣	≥35	39	1	刺激方案	1	225	≤10天	5	≤3000	1125	HCG	8	3	1	继发不孕	0.41	≤24	22.5	女方因素	3	14.16	692	0.53	3	6.9	3.67	42.91	4	5	6.8	B-C	IVF	3	0	2	0	0	0	0	否	否	全胚冷冻
2279	0	2017100086	张春艳	＜35	32	6	刺激方案	1	234.783	＞10天	23	＞3000	5400	HCG	6	0	0	原发不孕	0.20	＞24	26.7	女方因素	1	7.05	298	0.42	0	6.9	3.67	42.91	3	3				0	0	0	0	0	0	0	是		未取到卵
2141	0	C00017286	刘金兰	≥35	42	1	拮抗剂方案	2	175	≤10天	6	≤3000	1050	双扳机	1	4	1	继发不孕	1.03	＞24	24.5	女方因素	1	6.67	386	0.55	1	6.7	3.69	27	4	7	7.5	A	IVF	1	0	1	0	0	0	0	否	否	全胚冷冻
813	0	2016100051	燕国英	≥35	44	2	刺激方案	1	283.333	≤10天	9	≤3000	2550	HCG	1	4	1	继发不孕	0.55	≤24	22.5	女方因素	5	1.43	1548	1.56	6	9.92	3.71	39.5	4	7	9.1	A	IVF	6	0	4	0	0	0	0	否	否	全胚冷冻
1576	1	C00012984	刘静	≥35	40	5	降调节方案	3	300	≤10天	8	≤3000	2400	HCG	6	2	1	继发不孕	1.03	≤24	20.2	女方因素	3	1.93	1064	2.38	3	6.98	3.71	38	4	7	10	B	IVF	1	0	1	1	0	0	0	否	否	全胚冷冻
1638	1	C00006760	刘静	≥35	39	4	降调节方案	3	292.5	≤10天	10	≤3000	2925	HCG	5	2	1	继发不孕	0.99	≤24	20.2	女方因素	2	1.42	890	2.24	2	6.98	3.71	38	4	6	0.97	B	IVF	2	0	2	2	0	0	0	否	否	全胚冷冻
1896	1	2017110110	燕国英	≥35	45	3	降调节方案	3	300	≤10天	9	≤3000	2700	HCG	1	4	1	继发不孕	1.090	≤24	22.5	女方因素	2	0.79	394	0.65	2	9.92	3.71	38	4	4	8.4	A	IVF	1	0	1	0	2	2	0	否	是	移植	未妊娠
1765	1	2017050037	王玉方	≥35	45	1	刺激方案	1	450	≤10天	6	≤3000	2700	HCG	3	6	1	继发不孕	0.54	≤24	23	女方因素	2	6.4	607	1.08	2	16.05	3.73	91	4	3	14.9	A-B	IVF	2	0	2	2	0	0	0	否	否	全胚冷冻
328	1	2017020107	范秋玲	≥35	39	4	降调节方案	3	350	≤10天	10	＞3000	3500	HCG	4	2	1	继发不孕	0.9	≤24	23.4	男方因素	7	1.45	2119	1.38	4	11.86	3.74	67	4	7	14.9	A	ICSI	4	0	4	2	2	2	0	否	是	移植	未妊娠
838	0	C00012273	王剑非	≥35	44	1	拮抗剂方案	2	278.571	≤10天	7	≤3000	1950	HCG	1	3	1	继发不孕	1.04	≤24	21.5	女方因素	5	5.56	1401	0.27	3	12.36	3.74	56.56	4	7	10.1	A-B	IVF	1	0	1	0	1	1	0	否	是	移植	未妊娠
1282	1	2017100175	王凤芹	≥35	43	2	刺激方案	1	300	＞10天	13	＞3000	3900	HCG	3	4	4	继发不孕	0.64	＞24	24.8	混合因素	3	2.86	829	0.75	3	7.7	3.74	25	4	4	11.1	B	ICSI	2	0	2	0	2	2	0	否	是	移植	未妊娠
1516	1	C00012401	王凤芹	≥35	46	6	刺激方案	1	300	＞10天	12	＞3000	3600	HCG	5	4	1	继发不孕	1.09	＞24	24.8	女方因素	3	10.05	860	1.03	2	7.7	3.74	25	4	4	0.88	B	IVF	1	0	1	0	0	0	0	否	否	全胚冷冻
1986	0	C00012841	王剑非	≥35	44	2	刺激方案	1	278.571	≤10天	7	≤3000	1950	HCG	1	3	1	继发不孕	0.89	≤24	21.5	女方因素	2	18.15	383	0.5	2	7.49	3.74	45.67	4	7	7.5	B	IVF	1	0	0	0	0	0	0	是		无可移植胚胎
2103	1	C00009718	王凤芹	≥35	45	4	刺激方案	1	450	≤10天	7	＞3000	3150	HCG	5	4	1	继发不孕	0.75	＞24	24.8	混合因素	1	12.55	463	0.44	0	7.7	3.74	25	4	4	0.67	C		0	0	0	0	0	0	0	是		未取到卵
1476	1	2016080240	尹芳	＜35	32	8	刺激方案	1	300	≤10天	7	≤3000	2100	HCG	2	1	0	继发不孕	0.77	≤24	20.5	女方因素	3	9.28	885	2.11	3	9.9	3.75	89	3	4	4.3	A	IVF	1	0	0	0	0	0	0	是		无可移植胚胎
1810	0	2016080075	尹芳	＜35	32	7	刺激方案	1	214.286	≤10天	7	≤3000	1500	HCG	2	1	0	继发不孕	0.95	≤24	20.5	女方因素	2	4.22	529	0.76	2	9.9	3.75	89	3	4	7.5	A-B	IVF	2	0	0	0	0	0	0	是		无可移植胚胎
1997	0	2018050229	孙颂华	≥35	44	1	刺激方案	1	225	≤10天	10	≤3000	2250	HCG	3	6	1	继发不孕	0.22	≤24	22.4	女方因素	2	1.69	490	1.27	2	7.69	3.76	63.39	4	8	6.4	B	IVF	2	0	2	1	0	0	0	否	否	全胚冷冻
2074	0	C00007130	王欣	≥35	49	1	拮抗剂方案	2	187.5	≤10天	8	≤3000	1500	双扳机	6	2	1	继发不孕	0.27	＞24	26	混合因素	1	4.12	549	1.67	1	8.26	3.76	30	4	5	9.7	A	ICSI	0	0	0	0	0	0	0	是		无可移植胚胎
786	1	2017060220	路克英	≥35	47	4	刺激方案	1	300	≤10天	9	≤3000	2700	HCG	1	1	1	继发不孕	0.5	＞24	25.8	女方因素	5	5.04	1702	0.88	5	5.67	3.77	15.08	4	7	9	A	IVF	4	0	2	1	0	0	0	否	否	全胚冷冻
1309	1	C00003404	王兆君	＜35	33	3	刺激方案	1	364.286	＞10天	14	＞3000	5100	HCG	4	1	0	继发不孕	0.22	≤24	22.4	女方因素	3	7.12	737	1.04	1	5.16	3.78	31	3	4	10.2	B-C	IVF	0	0	0	0	0	0	0	是		未受精
1694	0	C00015759	焦金花	≥35	48	1	拮抗剂方案	2	278.571	≤10天	7	≤3000	1950	HCG	2	2	2	继发不孕	0.76	＞24	25.7	混合因素	2	9.35	767	0.95		5.53	3.78	62	4	2	13.4	A		0	0	0	0	0	0	0	是		未取卵
2166	1	C00015091	张丽	≥35	42	1	拮抗剂方案	2	325	≤10天	8	≤3000	2600	HCG	1	3	1	继发不孕	0.85	≤24	23.7	男方因素	1	5.11	326	0.48	2	12.6	3.79	47	4	4	11.8	A	ICSI	1	0	1	0	1	1	0	否	是	移植	未妊娠
319	1	2017110192	刘秀蓬	≥35	43	2	降调节方案	3	300	≤10天	9	≤3000	2700	HCG	5	3	1	继发不孕	0.46	≤24	21.5	混合因素	7	1.22	2178	0.73	6	10.37	3.8	57	4	7	6.3	B-C	ICSI	5	0	2	1	0	0	0	否	否	全胚冷冻
628	0	2017080123	刘秀蓬	≥35	42	1	拮抗剂方案	2	206.25	≤10天	8	≤3000	1650	HCG	5	3	1	继发不孕	0.47	≤24	21.5	混合因素	6	2.72	1121	0.74	4	10.37	3.8	57	4	7	7	B	ICSI	3	0	0	0	0	0	0	是		无可移植胚胎
1889	1	2016030252	许彦华	≥35	44	1	刺激方案	1	450	≤10天	7	＞3000	3150	HCG	1	1	1	继发不孕	0.13	≤24	23.8	混合因素	2	4.5	439	1.32	1	10.7	3.8	87.47	4	3	9.6	A-B	ICSI	1	0	1	0	0	0	0	否	否	全胚冷冻
1644	1	C00010567	王文平	≥35	39	1	拮抗剂方案	2	364.286	≤10天	7	≤3000	2550	HCG	0	1	0	继发不孕	0.14	≤24	20.1	女方因素	2	5.17	883	1.46	3	8.6	3.81	63	4	6	5.7	A	IVF	2	0	2	2	2	2	0	否	是	移植	未妊娠
1233	1	2017070007	李晓	＜35	27	2	拮抗剂方案	2	300	≤10天	9	≤3000	2700	HCG	4	2	0	继发不孕	0.61	≤24	22.2	混合因素	3	3.97	962	0.44	2	15.2	3.82	55.78	3	3	10.4	A	ICSI	2	0	2	1	2	2	0	否	是	移植	已妊娠	临床妊娠	宫内妊娠	单胎宫内妊娠
2252	1	2017060042	李晓	＜35	27	1	拮抗剂方案	2	332.143	≤10天	7	≤3000	2325	HCG	4	2	0	继发不孕	0.51	≤24	22.2	混合因素	1	9.65	433	2.5	1	15.2	3.82	18	3	2	7			0	0	0	0	0	0	0	是		未行授精
439	1	2016110190	郭璟	≥35	41	2	拮抗剂方案	2	602.273	＞10天	11	＞3000	6625	HCG	5	1	1	继发不孕	0.83	≤24	20.2	混合因素	6	1.52	1784	1.43	4	9.7	3.83	93.36	4	5	8.9	A	ICSI	4	0	2	1	2	2	0	否	是	移植	未妊娠
1065	0	2017030190	郭璟	≥35	41	3	降调节方案	3	287.5	＞10天	12	＞3000	3450	HCG	5	1	1	继发不孕	0.35	≤24	20.2	混合因素	4	2.42	1624	1.48	3	9.7	3.83	95.42	4	5	9.7	A	ICSI	2	0	2	2	2	2	0	否	是	移植	未妊娠
1214	1	2018040283	郭璟	≥35	42	4	降调节方案	3	322.5	≤10天	10	＞3000	3225	HCG	5	1	1	继发不孕	0.989	≤24	20.2	男方因素	4	11.01	1149	1.08	5	9.7	3.83	44	4	5	8.1	A	ICSI	3	0	2	0	2	2	0	否	是	移植	未妊娠
1441	1	2016100227	郭璟	≥35	41	1	降调节方案	3	328.125	≤10天	8	≤3000	2625	HCG	5	1	1	继发不孕	0.78	≤24	20.2	混合因素	3	12.88	926	1.05	2	9.7	3.83	93.36	4	5	7.8	A	ICSI	1	0	1	0	0	0	0	否	否	全胚冷冻
877	1	C00013108	姜桂霞	≥35	44	3	刺激方案	1	300	＞10天	15	＞3000	4500	HCG	2	2	1	继发不孕	0.52	＞24	28.1	女方因素	5	19.09	1166	1.02	1	13.13	3.84	93.36	4	5	0.56	A-B	IVF	0	0	0	0	0	0	0	是		无可移植胚胎
1799	0	C00011680	姜桂霞	≥35	44	2	刺激方案	1	225	≤10天	9	≤3000	2025	HCG	2	2	1	继发不孕	0.20	＞24	28.1	女方因素	2	14	541	0.26	2	13.13	3.84	93.36	4	4	0.53	B	IVF	0	0	0	0	0	0	0	是		无可移植胚胎
1996	1	C00010652	姜桂霞	≥35	43	1	刺激方案	1	450	＞10天	12	＞3000	5400	HCG	1	2	1	继发不孕	0.42	＞24	28.1	女方因素	2	6.29	494	0.36	3	13.13	3.84	93.36	4	5	0.52	B	IVF	0	0	0	0	0	0	0	是		无可移植胚胎
2063	0	C00010825	苏风杰	≥35	48	2	拮抗剂方案	2	234.375	≤10天	8	≤3000	1875	HCG	9	3	1	继发不孕	0.76	＞24	26.7	女方因素	1	6.72	590	0.44	1	13.41	3.85	10	4	3	13.3	B	IVF	1	0	1	0	1	1	0	否	是	移植	未妊娠
2174	0	C00012216	苏风杰	≥35	48	4	拮抗剂方案	2	200	≤10天	8	≤3000	1600	HCG	10	3	1	继发不孕	0.75	＞24	26.7	女方因素	1	8.56	315	0.56	1	13.41	3.85	10	4	3	13.4	A	IVF	1	0	1	0	1	1	0	否	是	移植	未妊娠
2211	0	C00009646	苏风杰	≥35	47	1	拮抗剂方案	2	150	≤10天	10	≤3000	1500	HCG	9	3	1	继发不孕	0.77	＞24	26.7	女方因素	1	7.72	239	1.36	1	13.41	3.85	10	4	3	1.37	A	IVF	0	0	0	0	0	0	0	是		无可移植胚胎
1429	1	2016100110	李春光	≥35	37	1	刺激方案	1	300	≤10天	8	≤3000	2400	HCG	3	0	0	继发不孕	1.05	＞24	25	女方因素	3	3.36	962	1.38	2	9.04	3.87	67.5	4	6	18.3	A	IVF	2	0	0	0	0	0	0	是		无可移植胚胎
1627	1	2017050017	李小红	≥35	40	1	降调节方案	3	302.273	＞10天	11	＞3000	3325	HCG	4	1	1	继发不孕	0.69	≤24	19.1	男方因素	2	0.76	918	0.43	3	14.86	3.87	67.61	4	6	11	B	ICSI	3	0	3	2	2	2	0	否	是	移植	未妊娠
1596	1	2018060051	马爱君	≥35	49	1	刺激方案	1	358.333	≤10天	9	＞3000	3225	HCG	3	2	1	继发不孕	0.48	≤24	22	女方因素	3	0.37	932	0.79	3	6.7	3.88	44.67	4	4	6.9	B-C	IVF	2	0	0	0	0	0	0	是		无可移植胚胎
943	1	2017080160	王南南	≥35	39	1	拮抗剂方案	2	390	＞10天	15	＞3000	5850	HCG	13	0	0	原发不孕	0.48	≤24	19.8	男方因素	4	9.26	798	2.48	2	9.71	3.92	53.77	4	5	9.6	A	ICSI	2	0	2	0	0	0	0	否	否	全胚冷冻
1625	1	C00004551	王南南	≥35	40	3	降调节方案	3	375	＞10天	11	＞3000	4125	HCG	14	0	0	原发不孕	0.82	≤24	19.8	男方因素	2	7.95	934	0.83	3	9.71	3.92	83.77	4	5	8.7	A	ICSI	3	0	3	2	2	2	0	否	是	移植	未妊娠
1628	1	2018030130	王南南	≥35	40	2	拮抗剂方案	2	560.714	＞10天	14	＞3000	7850	HCG	14	0	0	原发不孕	0.95	≤24	19.8	女方因素	2	6.25	918	1.13	3	9.71	3.92	73.77	4	5	11.6	A	IVF	3	0	1	0	0	0	0	否	否	全胚冷冻
987	1	C00011591	杜娜娜	≥35	35	1	刺激方案	1	300	≤10天	8	≤3000	2400	HCG	3	0	0	原发不孕	0.57	≤24	22	女方因素	4	8.15	1330	1.42	2	15.2	3.98	40	4	3			IVF	1	0	1	0	0	0	0	否	否	全胚冷冻
1364	1	C00018381	王艳	≥35	35	1	拮抗剂方案	2	347.727	＞10天	11	＞3000	3825	HCG	3	0	0	原发不孕	0.19	＞24	26	混合因素	3	0.9	534.17	1.08	3	7.15	3.98	59.09	4	7	10.1	B	ICSI	3	0	2	0	2	2	0	否	是	移植	未妊娠
1832	1	C00005073	李慧	≥35	43	1	刺激方案	1	381.25	＞10天	12	＞3000	4575	双扳机	4	3	3	继发不孕	0.58	≤24	20.8	女方因素	2	3.75	486	0.74	1	15.2	3.98	40	4	5	8.9	A	IVF	0	0	0	0	0	0	0	是		无可移植胚胎
2014	1	C00013478	杜娜娜	≥35	35	3	刺激方案	1	300	≤10天	8	≤3000	2400	HCG	3	0	0	原发不孕	0.65	≤24	22	女方因素	1	17.79	840	0.72	1	15.2	3.98	40	4	3	0.94	B	IVF	1	0	1	0	0	0	0	否	否	全胚冷冻
2271	1	C00012858	杜娜娜	≥35	35	2	刺激方案	1	375	≤10天	10	＞3000	3750	HCG	3	0	0	原发不孕	0.96	≤24	22	女方因素	1	5.47	313	1.78	1	15.2	3.98	40	4	3			IVF	0	0	1	0	0	0	0	否	否	全胚冷冻
572	1	C00010466	李亚丽	≥35	46	1	刺激方案	1	300	≤10天	8	≤3000	2400	HCG	7	4	2	继发不孕	0.74	≤24	22	女方因素	6	7.6	1724	1.24	6	8.11	3.99	42	4	11	0.5	A	IVF	5	0	2	0	0	0	0	否	否	全胚冷冻
1288	0	C00010869	杜蕾蕾	＜35	28	1	拮抗剂方案	2	237.5	≤10天	8	≤3000	1900	HCG	6	0	0	原发不孕	1.13	≤24	16.8	女方因素	3	4.33	813	1.49	3	10.95	4	48	3	7	11.1	A	IVF	1	1	1	0	1	0	1	否	是	移植	未妊娠
1579	1	C00003429	吕彦娜	≥35	38	4	刺激方案	1	375	≤10天	10	＞3000	3750	HCG	2	5	3	继发不孕	0.41	＞24	25.7	女方因素	3	7.89	1051	1.13	2	11.26	4.01	53	4	6	5.2	A-B	IVF	2	0	2	1	0	0	0	否	否	全胚冷冻
2048	1	C00004094	郭冬梅	≥35	46	1	降调节方案	3	450	≤10天	7	＞3000	3150	HCG	6	5	2	继发不孕	0.67	＞24	26	混合因素	1	11.18	655	1.35		13.58	4.01	62	4	3	7.3	B		0	0	0	0	0	0	0	是		未取卵
2188	1	2018050222	吕彦娜	≥35	37	3	刺激方案	1	312.5	≤10天	6	≤3000	1875	HCG	2	5	3	继发不孕	0.43	＞24	25.7	女方因素	1	2.3	287	0.42	1	11.26	4.01	43	4	6	8	B	IVF	0	0	0	0	0	0	0	是		无可移植胚胎
2259	0	C00003717	陈芳芳	≥35	35	6	刺激方案	1	281.25	≤10天	4	≤3000	1125	HCG	7	0	0	原发不孕	0.24	≤24	22.3	女方因素	1	15.66	337.39	1.06	0	19.73	4.01	36.7	4	1				0	0	0	0	0	0	0	是		未取到卵
1556	0	2016030347	李倩	≥35	41	1	降调节方案	3	285	≤10天	10	≤3000	2850	HCG	3	0	0	继发不孕	0.603	≤24	23.7	不明原因	3	2.26	1142	0.09	2	12	4.03	95.42	4	4	10.5	B	IVF	2	0	2	1	2	2	0	否	是	移植	未妊娠
1728	1	2016100207	李倩	≥35	42	3	刺激方案	1	450	≤10天	9	＞3000	4050	HCG	3	2	1	继发不孕	0.85	≤24	23.7	女方因素	2	7.62	686	1.17	2	12	4.03	52	4	4	8.3	A-B	IVF	1	0	0	0	0	0	0	是		无可移植胚胎
1775	1	2016070012	李倩	≥35	42	2	刺激方案	1	307.5	≤10天	10	＞3000	3075	HCG	3	2	1	继发不孕	0.52	≤24	23.7	女方因素	2	1.42	593	0.68	2	12	4.03	44	4	5	9.7	B	IVF	2	0	1	0	0	0	0	否	否	全胚冷冻
1981	1	2018060095	陈文君	≥35	49	1	刺激方案	1	294.231	＞10天	13	＞3000	3825	HCG	6	2	2	继发不孕	0.78	＞24	27.1	女方因素	2	16.46	417	0.7	4	8.9	4.03	43.67	4	6	0.71	A	IVF	1	0	0	0	0	0	0	是		无可移植胚胎
2224	0	2016110265	李倩	≥35	42	4	刺激方案	1	150	≤10天	7	≤3000	1050	HCG	3	2	1	继发不孕	0.316	≤24	23.7	女方因素	1	2.46	186	0.62	1	12	4.03	35.42	4	2	8.3	B	IVF	1	0	1	0	0	0	0	否	否	全胚冷冻
1184	0	2016120182	路云	≥35	45	2	刺激方案	1	225	≤10天	9	≤3000	2025	HCG	1	3	1	继发不孕	0.86	＞24	24.3	女方因素	4	3.26	1122	0.51	5	9.13	4.04	59	4	6	5	B	IVF	2	0	0	0	0	0	0	是		无可移植胚胎
1474	1	2016100122	路云	≥35	45	1	刺激方案	1	330	≤10天	5	≤3000	1650	HCG	1	3	1	继发不孕	1.13	＞24	24.3	女方因素	3	1.49	887	0.82	4	9.13	4.04	59	4	6	9.5	A	IVF	2	0	2	1	2	2	0	否	是	移植	未妊娠
2236	0	C00003801	李花平	≥35	42	1	降调节方案	3	278.571	≤10天	7	≤3000	1950	HCG	4	1	1	继发不孕	0.7	≤24	21.4	女方因素	1	16	314	1.14	2	12.56	4.04	88	4	5	0.61	B	IVF	0	0	0	0	0	0	0	是		无可移植胚胎
2104	0	C00015157	张静	≥35	36	1	拮抗剂方案	2	225	≤10天	9	≤3000	2025	双扳机	3	3	0	继发不孕	1.12	＞24	29.1	女方因素	1	6.98	460	0.53	1	10.96	4.06	95.42	4	5	10.2	B		0	0	0	0	0	0	0	是		未行授精
1867	1	C00017015	刘菲菲	≥35	36	1	刺激方案	1	340.385	＞10天	13	＞3000	4425	HCG	3	0	0	原发不孕	0.3	≤24	23.4	女方因素	2	32.99	362	1.73	0	6.23	4.07	76.86	4	5	6.3	B		0	0	0	0	0	0	0	是		未取到卵
1838	0	C00005298	田相云	≥35	45	3	刺激方案	1	250	≤10天	9	≤3000	2250	HCG	3	1	1	继发不孕	0.86	≤24	24	女方因素	2	7.46	469	0.78	3	7.34	4.08	51	4	5	0.76	B	IVF	1	0	1	1	0	0	0	否	否	全胚冷冻
1156	0	2016100214	刘文静	＜35	31	2	拮抗剂方案	2	283.333	≤10天	9	≤3000	2550	HCG	3	0	0	原发不孕	1.13	≤24	20	男方因素	4	1.15	1239	0.76	4	6.3	4.09	45.2	3	6	8.3	B	ICSI	6	0	4	0	2	2	0	否	是	移植	未妊娠
2147	0	2018050045	吴迷勇	≥35	41	1	降调节方案	3	248.077	＞10天	13	＞3000	3225	双扳机	3	1	1	继发不孕	0.88	＞24	25.4	女方因素	1	13.58	376	0.88	1	8.86	4.1	34.78	4	6	12.9	B	IVF	0	0	0	0	0	0	0	是		未受精
1865	0	2016020020	娄本岭	＜35	29	1	刺激方案	1	150	≤10天	4	≤3000	600	HCG	1	2	1	继发不孕	1.1	＞24	27.3	女方因素	2	6.38	365	1.21	2	9.69	4.11	91	3	3	11.4	A-B	IVF	2	0	0	0	0	0	0	是		无可移植胚胎
1039	1	C00005745	杨春荣	≥35	42	1	刺激方案	1	352.5	≤10天	10	＞3000	3525	HCG	3	1	1	继发不孕	0.59	≤24	23	混合因素	4	7.62	1112	0.79	3	8.44	4.12	36	4	7	1.08	A	ICSI	2	0	1	1	0	0	0	否	否	全胚冷冻
1470	0	C00018792	张智霞	≥35	42	1	拮抗剂方案	2	258.333	≤10天	9	≤3000	2325	HCG	1	4	1	继发不孕	1.18	≤24	21.6	女方因素	3	8.53	934	1.26	4	11.13	4.12	46.72	4	7	8.7	A	IVF	2	0	1	1	0	0	0	否	否	全胚冷冻
1747	1	2016060161	张艳	≥35	40	1	降调节方案	3	400	＞10天	15	＞3000	6000	HCG	1	0	0	原发不孕	0.31	＞24	27.5	女方因素	2	0.57	633	0.52	3	12.17	4.12	70.63	4	5	14	A	IVF	2	0	2	1	2	2	0	否	是	移植	已妊娠	临床妊娠	宫内妊娠	单胎宫内妊娠
165	1	C00004102	巩加喜	≥35	49	2	拮抗剂方案	2	450	≤10天	8	＞3000	3600	双扳机	4	2	1	继发不孕	1.13	≤24	22	男方因素	8	2.45	2665	1.06	5	7.3	4.14	28	4	11	10.9	A	ICSI	3	0	2	0	0	0	0	否	否	全胚冷冻
1221	1	C00004990	巩加喜	≥35	49	3	降调节方案	3	400	≤10天	6	≤3000	2400	HCG	4	2	1	继发不孕	0.34	≤24	22	女方因素	3	5.44	995	1.09	3	7.3	4.14	28	4	11	11.7	A	IVF	1	0	1	1	1	1	0	否	是	移植	未妊娠
1494	1	2016030230	刘国红	≥35	40	1	刺激方案	1	318.182	＞10天	11	＞3000	3500	HCG	2	2	0	继发不孕	0.19	≤24	21.6	女方因素	3	18	968	1.97	2	11.26	4.15	45	4	4	4.3	B	IVF	1	0	1	0	0	0	0	否	否	全胚冷冻
1529	1	2016060095	刘国红	≥35	40	2	刺激方案	1	421.875	≤10天	8	＞3000	3375	HCG	2	2	0	继发不孕	0.84	≤24	21.6	混合因素	3	13.02	1237	1.21	3	11.26	4.15	45	4	4	5.5	A	ICSI	1	0	1	1	0	0	0	否	否	全胚冷冻
1543	1	C00018484	穆举芹	≥35	45	1	拮抗剂方案	2	340.909	＞10天	11	＞3000	3750	HCG	4	1	1	继发不孕	0.98	≤24	22.1	男方因素	3	1.84	1170	1.11	3	9.92	4.15	39.7	4	6	9.3	A	ICSI	2	0	2	1	2	2	0	否	是	移植	未妊娠
1855	0	C00009465	李永菊	≥35	47	1	刺激方案	1	150	≤10天	4	≤3000	600	HCG	3	5	1	继发不孕	0.20	＞24	24.5	混合因素	2	30.93	412	0.81		11.26	4.15	67.78	4	3	14.9	A		0	0	0	0	0	0	0	是		未取卵
1106	1	2017040171	刘淑云	≥35	41	1	降调节方案	3	325	≤10天	8	≤3000	2600	HCG	3	2	1	继发不孕	0.928	＞24	25	女方因素	4	8.1	1418	0.76	3	11.48	4.17	95	4	5	15.8	B	IVF	1	0	1	0	1	1	0	否	是	移植	未妊娠
2002	1	2016030326	孙在芳	≥35	43	1	刺激方案	1	347.727	＞10天	11	＞3000	3825	HCG	2	4	1	继发不孕	0.93	≤24	23.2	女方因素	1	4.61	965	0.49	3	14.45	4.17	78.54	4	6	8	A	IVF	3	0	2	0	0	0	0	否	否	全胚冷冻
2023	0	2016120234	孙燕	≥35	42	1	刺激方案	1	193.75	＞10天	12	≤3000	2325	HCG	1	4	1	继发不孕	0.2	＞24	25.6	女方因素	1	2.79	743	0.87	2	13.75	4.17	65	4	3	8	B	IVF	1	0	1	1	0	0	0	否	否	全胚冷冻
2135	0	2017040168	孙燕	≥35	43	2	刺激方案	1	150	≤10天	9	≤3000	1350	HCG	1	4	1	继发不孕	0.93	＞24	25.6	女方因素	1	15.27	396	0.67	1	13.75	4.17	65	4	3	6.5	A-B	IVF	0	0	0	0	0	0	0	是		无可移植胚胎
1015	1	C00016139	汪晓宁	＜35	33	1	刺激方案	1	300	≤10天	9	≤3000	2700	HCG	3	1	1	继发不孕	1.09	≤24	20.6	女方因素	4	18.5	1206	0.87	3	7.1	4.2	83	3	6	0.59	A	IVF	2	0	2	1	0	0	0	否	否	全胚冷冻
1151	1	2018060093	孙敏	＜35	34	4	刺激方案	1	450	≤10天	8	＞3000	3600	HCG	3	1	0	继发不孕	1.13	≤24	19.4	不明原因	4	9	1269	0.62	3	8.6	4.2	51	3	6	5.4	B	ICSI	3	0	1	0	0	0	0	否	否	全胚冷冻
1167	0	C00013006	张莎莎	＜35	32	1	拮抗剂方案	2	203.571	≤10天	7	≤3000	1425	HCG	2	1	1	继发不孕	1.13	＞24	25	女方因素	4	6.56	1195	0.83	2	7.99	4.2	83	3	8	9.7	A	IVF	1	0	1	0	1	1	0	否	是	移植	未妊娠
1571	1	2018040085	周素丽	≥35	42	2	拮抗剂方案	2	300	≤10天	5	≤3000	1500	HCG	3	4	1	继发不孕	0.25	≤24	20	男方因素	3	2.61	1080	0.7	2	8.17	4.2	102	4	4	8.2	A	ICSI	1	0	0	0	0	0	0	是		无可移植胚胎
1934	1	2017100158	周素丽	≥35	42	1	刺激方案	1	300	≤10天	10	≤3000	3000	HCG	3	4	1	继发不孕	0.63	≤24	20	女方因素	2	5.85	435	0.35	1	8.17	4.2	102	4	4	10.7	A	IVF	0	0	0	0	0	0	0	是		未受精
1245	1	2016040102	车秀平	≥35	46	1	刺激方案	1	300	≤10天	8	≤3000	2400	HCG	3	2	1	原发不孕	0.80	≤24	23.4	女方因素	3	3.05	926	0.96	3	16.35	4.21	73.77	4	4	11	A	IVF	3	0	3	0	0	0	0	否	否	全胚冷冻
1833	0	C00003351	张俊荣	≥35	48	2	拮抗剂方案	2	235.714	≤10天	7	≤3000	1650	双扳机	3	1	1	继发不孕	0.5	＞24	25.4	男方因素	2	10.17	484	0.94	2	6.23	4.21	32	4	3	9.8	10.17	ICSI	2	0	2	0	2	2	0	否	是	移植	未妊娠
2077	0	2018050012	张俊荣	≥35	47	1	拮抗剂方案	2	200	≤10天	10	≤3000	2000	HCG	3	1	1	继发不孕	0.32	＞24	25.4	女方因素	1	33	533	1.72	2	6.23	4.21	32	4	3	8.5	B-C	IVF	0	0	0	0	0	0	0	是		无可移植胚胎
1072	0	2017020211	孟玲	≥35	44	1	降调节方案	3	175	＞10天	12	≤3000	2100	HCG	2	3	1	继发不孕	1.00	≤24	23.7	女方因素	4	9.5	1569	0.44	5	5.95	4.22	40	4	7	12.9	B	IVF	2	0	2	2	2	2	0	否	是	移植	已妊娠	临床妊娠	宫内妊娠	单胚胎停
488	1	2017030217	杨传梅	≥35	44	2	刺激方案	1	366.667	≤10天	9	＞3000	3300	HCG	4	6	2	继发不孕	0.93	＞24	25.6	女方因素	6	0.99	2620	0.64	6	12.04	4.23	73.77	4	8	11	B	IVF	3	0	2	1	0	0	0	否	否	全胚冷冻
837	1	2016090133	杨传梅	≥35	44	1	刺激方案	1	403.846	＞10天	13	＞3000	5250	HCG	4	6	2	继发不孕	0.93	＞24	25.6	女方因素	5	1.69	1401	1.25	5	12.04	4.23	73.77	4	8	8.7	B	IVF	3	0	0	0	0	0	0	是		无可移植胚胎
1289	1	2017070043	杨传梅	≥35	45	3	刺激方案	1	381.25	＞10天	12	＞3000	4575	HCG	4	6	2	继发不孕	0.93	＞24	25.6	女方因素	3	1.76	811	0.78	2	12.04	4.23	73.77	4	8	11.2	B	IVF	2	0	2	0	0	0	0	否	否	全胚冷冻
1353	1	2017050139	钟奕	≥35	46	4	刺激方案	1	300	≤10天	5	≤3000	1500	HCG	5	1	0	继发不孕	0.02	≤24	23.4	女方因素	3	16.38	570	0.67	2	15.78	4.23	35	4	3	11.6	A-B	IVF	0	0	0	0	0	0	0	是		无可移植胚胎
2119	0	C00007415	武文波	≥35	44	2	刺激方案	1	225	≤10天	6	≤3000	1350	HCG	1	5	0	继发不孕	0.20	≤24	22.7	男方因素	1	8.44	441	0.68	1	8.62	4.23	87.85	4	3	5.1	B	ICSI	1	0	1	1	0	0	0	否	否	全胚冷冻
2129	1	C00006871	武文波	≥35	44	1	拮抗剂方案	2	383.333	≤10天	9	＞3000	3450	双扳机	1	5	0	继发不孕	0.18	≤24	22.7	女方因素	1	14.92	416	0.19	1	8.62	4.23	87.85	4	3	6.9	A	IVF	1	0	0	0	1	1	0	否	是	移植	未妊娠
2176	1	2016120055	钟奕	≥35	45	3	刺激方案	1	423.214	＞10天	14	＞3000	5925	HCG	5	1	0	继发不孕	0.76	≤24	23.4	女方因素	1	2.43	312	0.72	1	16.78	4.23	35	4	3	10	A-B	IVF	1	0	0	0	0	0	0	是		无可移植胚胎
560	1	2016040048	满英姿	≥35	42	1	降调节方案	3	300	＞10天	11	＞3000	3300	HCG	2	3	1	继发不孕	0.64	≤24	21.6	混合因素	6	10.53	1839	1.39	4	13.3	4.24	41.3	4	6	10.5	B	ICSI	3	0	2	1	2	2	0	否	是	移植	未妊娠
1130	1	2016040126	夏燕	≥35	47	4	降调节方案	3	375	≤10天	10	＞3000	3750	HCG	12	0	0	原发不孕	0.47	＞24	27.7	女方因素	4	1.14	1344	1.43	4	15.48	4.24	96.43	4	6	8.5	A	IVF	4	0	2	2	2	2	0	否	是	移植	未妊娠
1237	1	2016010063	夏燕	≥35	47	3	刺激方案	1	393.75	≤10天	8	＞3000	3150	HCG	12	0	0	原发不孕	0.54	＞24	27.7	女方因素	3	1.4	945	1.71	4	15.48	4.24	96.43	4	6	8.7	A-B	IVF	1	0	2	0	2	2	0	否	是	移植	未妊娠
1266	0	2017050159	夏燕	≥35	48	7	刺激方案	1	225	≤10天	8	≤3000	1800	HCG	13	0	0	原发不孕	0.71	＞24	27.7	女方因素	3	9.98	882	1.94	3	15.48	4.24	96.43	4	5	6	B	IVF	2	0	2	2	0	0	0	否	否	全胚冷冻
1345	1	2016070142	夏燕	≥35	48	5	刺激方案	1	375	≤10天	8	≤3000	3000	HCG	13	0	0	原发不孕	0.13	＞24	27.7	女方因素	3	0.81	610	0.8	5	15.48	4.24	96.43	4	6	10.3	A	IVF	4	0	4	3	2	2	0	否	是	移植	未妊娠
1525	1	2016090053	满英姿	≥35	42	2	刺激方案	1	300	≤10天	8	≤3000	2400	HCG	2	3	1	继发不孕	0.81	≤24	21.6	混合因素	3	4.24	811	0.53	4	13.3	4.24	41.3	4	6	11.1	B	ICSI	2	0	2	2	2	2	0	否	是	移植	未妊娠
1572	0	2017080269	夏燕	≥35	49	8	刺激方案	1	150	＞10天	11	≤3000	1650	HCG	13	0	0	原发不孕	0.47	＞24	27.7	女方因素	3	14.82	1072	0.5	2	15.48	4.24	96.43	4	4	7	B	IVF	2	0	2	2	0	0	0	否	否	全胚冷冻
1604	0	2017050046	满英姿	≥35	43	3	刺激方案	1	225	≤10天	8	≤3000	1800	HCG	2	3	1	继发不孕	1.17	≤24	21.6	男方因素	2	10.07	996	0.9	2	13.3	4.24	41.3	4	6	10	B	ICSI	2	0	1	0	0	0	0	否	否	全胚冷冻
1686	1	C00014570	姜祖娜	≥35	45	1	降调节方案	3	290.625	≤10天	8	≤3000	2325	HCG	3	3	1	继发不孕	0.47	＞24	28.4	女方因素	2	5.13	779.9	0.36	2	13.3	4.24	41.3	4	3	8.7	A-B	IVF	2	0	2	2	1	1	0	否	是	移植	未妊娠
2056	1	C00011143	尹晶	＜35	33	2	拮抗剂方案	2	300	＞10天	11	＞3000	3300	HCG	3	0	0	原发不孕	0.74	＞24	27.1	混合因素	1	9.71	634	1.48	0	13.3	4.24	41.3	3	2	9.4	A-B		0	0	0	0	0	0	0	是		未取到卵
1313	1	2016080093	藏忠华	≥35	39	2	刺激方案	1	375	＞10天	12	＞3000	4500	HCG	9	1	0	继发不孕	0.97	＞24	29.3	女方因素	3	2.7	727	2.77	3	12.99	4.25	73.77	4	5	11	A	IVF	2	0	2	1	0	0	0	否	否	全胚冷冻
1962	0	2018070068	王洪英	≥35	40	1	刺激方案	1	287.5	＞10天	12	＞3000	3450	HCG	1	3	0	继发不孕	0.29	≤24	20.9	女方因素	2	9.44	480	1.68	2	15.68	4.25	62.42	4	4	5	A-B	IVF	2	0	1	0	0	0	0	否	否	全胚冷冻
1062	0	2016040110	李芹	≥35	49	3	刺激方案	1	225	≤10天	7	≤3000	1575	HCG	9	4	1	继发不孕	0.48	＞24	24.2	女方因素	4	4.38	1643	0.33	3	17.78	4.26	45.42	4	4	7.2	A-B	IVF	3	0	2	0	0	0	0	否	否	全胚冷冻
1372	0	2016010036	李芹	≥35	49	2	刺激方案	1	225	≤10天	6	≤3000	1350	HCG	7	4	3	继发不孕	0.1	＞24	24.2	女方因素	3	14.65	470	0.92		17.78	4.26	35.42	4	4	7.7	B		0	0	0	0	0	0	0	是		未取卵
1618	0	2017020151	李芹	≥35	50	4	刺激方案	1	150	≤10天	6	≤3000	900	HCG	9	4	1	继发不孕	0.82	＞24	24.2	女方因素	2	8.14	956	1.2	1	17.78	4.26	65.69	4	4	6.2	B	IVF	1	0	0	0	0	0	0	是		无可移植胚胎
2016	0	C00008153	臧传兰	≥35	46	1	刺激方案	1	225	＞10天	12	≤3000	2700	HCG	3	3	1	继发不孕	0.43	＞24	25	女方因素	1	23.03	824	0.84	1	19.48	4.26	10	4	3	0.65	B	IVF	1	0	1	0	0	0	0	否	否	全胚冷冻
776	0	2018010184	张红春	≥35	42	1	降调节方案	3	202.5	≤10天	10	≤3000	2025	HCG	5	2	1	继发不孕	0.904	≤24	22	女方因素	5	1.96	1777	0.44	4	18.27	4.27	12	4	7	8.4	A	IVF	4	0	4	0	2	2	0	否	是	移植	已妊娠	临床妊娠	宫内妊娠	单胚胎停
1032	0	2016060053	郭先红	＜35	34	1	刺激方案	1	225	≤10天	8	≤3000	1800	HCG	5	2	1	继发不孕	1.10	≤24	20.2	女方因素	4	2.61	1129	1.65	6	5.97	4.28	77	3	8	10.4	B	IVF	5	0	2	0	2	2	0	否	是	移植	已妊娠	临床妊娠	宫内妊娠	单胎宫内妊娠
291	1	2017120030	孟庆妹	≥35	45	3	拮抗剂方案	2	300	＞10天	15	＞3000	4500	双扳机	2	7	1	继发不孕	0.63	＞24	24.2	混合因素	3	1.86	662	0.57	4	12.88	4.29	80.6	4	6	7.1	A	ICSI	5	0	5	1	0	0	0	否	否	全胚冷冻
2262	1	2017070172	孟庆妹	≥35	44	1	拮抗剂方案	2	325	≤10天	7	≤3000	2275	HCG	1	7	1	继发不孕	0.12	＞24	24.2	混合因素	3	5.11	826	0.48	3	12.88	4.29	40.1	4	6			ICSI	3	0	2	2	0	0	0	否	否	全胚冷冻
497	0	2017020158	李秀粉	≥35	40	2	刺激方案	1	150	≤10天	8	≤3000	1200	HCG	2	3	1	继发不孕	0.48	≤24	23.3	女方因素	6	10.73	2500	0.69	6	6.12	4.31	36	4	7	7.7	A	IVF	4	0	3	0	0	0	0	否	否	全胚冷冻
1101	0	C00015876	李开美	≥35	50	7	刺激方案	1	225	≤10天	8	≤3000	1800	HCG	9	3	3	继发不孕	0.31	≤24	21.5	女方因素	4	6.39	1444	0.78	3	10.92	4.31	55	4	6	5.8	B-C	IVF	0	0	0	0	0	0	0	是		无可移植胚胎
1295	1	C00012564	于洪英	＜35	31	2	刺激方案	1	300	≤10天	6	≤3000	1800	HCG	7	0	0	原发不孕	0.36	＞24	31.6	女方因素	3	9.32	786	1.51	3	12.99	4.31	26	3	4	0.72	A-B	IVF	1	0	0	0	0	0	0	是		无可移植胚胎
1677	0	C00013605	李开美	≥35	49	4	刺激方案	1	150	≤10天	10	≤3000	1500	HCG	9	3	3	继发不孕	0.16	≤24	21.5	女方因素	2	15.64	810	0.31	0	10.92	4.31	55	4	2	4.6	B		0	0	0	0	0	0	0	是		未取到卵
2109	0	C00011621	李开美	≥35	49	1	刺激方案	1	150	≤10天	7	≤3000	1050	HCG	9	3	3	继发不孕	0.16	≤24	21.5	女方因素	1	14.87	454	0.25	0	10.92	4.31	55	4	2	5.4	B		0	0	0	0	0	0	0	是		未取到卵
1287	1	2016050212	冯国英	≥35	41	1	刺激方案	1	300	≤10天	10	≤3000	3000	HCG	2	4	2	继发不孕	0.95	＞24	29.3	女方因素	3	0.88	814	0.38	3	15.29	4.32	102	4	4	11	B	IVF	2	0	2	0	0	0	0	否	否	全胚冷冻
1592	1	2017050223	张英	≥35	42	1	降调节方案	3	318.75	＞10天	12	＞3000	3825	HCG	3	7	1	继发不孕	0.97	＞24	25.2	女方因素	3	1.17	1021	0.43	5	6.51	4.32	43	4	6	8.6	A	IVF	2	0	1	0	1	1	0	否	是	移植	已妊娠	临床妊娠	宫内妊娠	单胎宫内妊娠
1675	1	C00003542	李洪英	＜35	32	1	刺激方案	1	393.75	＞10天	12	＞3000	4725	HCG	2	2	1	继发不孕	0.91	≤24	22.8	女方因素	2	8.04	816	0.62	2	10.74	4.32	13	3	4	7.7	A-B	IVF	1	0	1	1	0	0	0	否	否	全胚冷冻
283	1	2017090054	林海燕	≥35	43	1	刺激方案	1	393.75	＞10天	12	＞3000	4725	HCG	10	0	0	继发不孕	0.87	＞24	28.2	女方因素	7	2.65	2081	0.94	7	12.3	4.34	40.03	4	7	13.5	B	IVF	4	0	2	1	0	0	0	否	否	全胚冷冻
1112	1	C00009824	林海燕	≥35	45	3	刺激方案	1	450	＞10天	12	＞3000	5400	HCG	10	1	0	继发不孕	0.87	＞24	28.2	女方因素	4	4.21	1404	0.99	3	12.3	4.34	40.03	4	4	11.1	B	IVF	1	0	1	0	0	0	0	否	否	全胚冷冻
1292	1	2016040211	赵勤	≥35	43	1	刺激方案	1	300	≤10天	6	≤3000	1800	HCG	2	2	0	继发不孕	0.7	＞24	25.3	男方因素	3	2.5	804	0.46	1	13.03	4.34	46	4	4	13.8	A-B	ICSI	1	0	1	1	0	0	0	否	否	全胚冷冻
1462	1	C00013829	臧红梅	≥35	39	1	降调节方案	3	315.625	＞10天	12	＞3000	3787.5	HCG	7	3	0	继发不孕	0.22	≤24	22.8	女方因素	3	3.21	961	1.24	4	9.94	4.34	22	4	6	12.5	A-B	IVF	4	0	2	2	2	2	0	否	是	移植	未妊娠
2058	0	2017120055	林海燕	≥35	43	2	刺激方案	1	225	≤10天	10	≤3000	2250	HCG	10	0	0	继发不孕	0.87	＞24	28.2	不明原因	1	4.73	619	0.68	1	12.3	4.34	40.03	4	7	8	B	IVF	0	0	0	0	0	0	0	是		无可移植胚胎
2198	0	C00005693	赵艳霞	≥35	39	6	刺激方案	1	285	≤10天	10	≤3000	2850	HCG	2	3	1	继发不孕	0.23	＞24	24.5	混合因素	1	34.52	268	1.2	0	12.66	4.35	73.77	4	1	10.5	A		0	0	0	0	0	0	0	是		未取到卵
480	1	2017100003	李涵	＜35	33	2	刺激方案	1	384.375	＞10天	16	＞3000	6150	HCG	6	0	0	原发不孕	1.02	＞24	25.7	女方因素	6	5.84	1724	1.34	1	10.7	4.36	87.09	3	5	10.8	A	IVF	1	0	0	0	0	0	0	是		无可移植胚胎
1085	1	C00007358	李涵	≥35	36	7	刺激方案	1	422.727	＞10天	11	＞3000	4650	HCG	6	0	0	原发不孕	1.02	＞24	25.7	男方因素	4	4.01	1500	0.67	3	10.7	4.36	87.09	4	6	0.81	A	ICSI	1	0	0	0	0	0	0	是		无可移植胚胎
1311	1	2018030228	李涵	＜35	34	3	刺激方案	1	300	≤10天	8	≤3000	2400	HCG	6	0	0	原发不孕	1.02	＞24	25.7	女方因素	3	5.21	733	0.92	2	10.7	4.36	87.09	3	5	7.6	B	IVF	1	0	1	0	0	0	0	否	否	全胚冷冻
1427	1	C00006282	成海燕	≥35	41	1	刺激方案	1	358.333	≤10天	9	＞3000	3225	HCG	1	5	1	继发不孕	1.0	＞24	26.4	女方因素	3	4.13	967	0.57	3	8.35	4.36	38	4	7	0.4	B	IVF	1	0	2	0	0	0	0	否	否	全胚冷冻
1438	1	2018050104	李涵	＜35	34	4	刺激方案	1	450	＞10天	12	＞3000	5400	HCG	6	0	0	原发不孕	1.02	＞24	25.7	女方因素	3	5.13	934	1.41	2	10.7	4.36	87.09	3	7	9.7	A-B	IVF	0	0	0	0	0	0	0	是		未受精
1566	1	C00011962	沈彤	＜35	33	1	刺激方案	1	345	＞10天	20	＞3000	6900	HCG	9	2	0	原发不孕	0.89	＞24	24.2	不明原因	3	18.54	1097	0.79	2	16.79	4.36	14	3	4	7.1	B	ICSI	2	0	2	0	2	2	0	否	是	移植	未妊娠
1590	1	2016080160	李涵	＜35	32	1	刺激方案	1	450	＞10天	12	＞3000	5400	HCG	6	0	0	原发不孕	1.02	＞24	25.7	女方因素	3	3.54	1026	1.63	5	10.7	4.36	87.09	3	7	10.5	A	IVF	3	0	1	0	1	1	0	否	是	移植	未妊娠
1610	1	C00004389	李涵	≥35	35	6	刺激方案	1	375	≤10天	9	＞3000	3375	HCG	6	0	0	原发不孕	1.02	＞24	25.7	女方因素	2	4.88	981	0.66	1	10.7	4.36	87.09	4	6	0.8	B	IVF	0	0	0	0	0	0	0	是		未受精
1715	0	2018060130	李涵	＜35	34	5	刺激方案	1	225	≤10天	6	≤3000	1350	HCG	6	0	0	原发不孕	1.02	＞24	25.7	女方因素	2	4.14	719	0.34	2	10.7	4.36	87.09	3	6	11.5	A-B	IVF	2	0	1	0	0	0	0	否	否	全胚冷冻
1822	1	2017120110	殷红霞	≥35	42	2	拮抗剂方案	2	397.5	＞10天	20	＞3000	7950	双扳机	0	2	1	继发不孕	0.58	＞24	26	混合因素	2	2.49	506	1.25	3	11.15	4.36	76.43	4	6	7.7	A	ICSI	2	0	1	1	0	0	0	否	否	全胚冷冻
1688	1	C00004809	李英	≥35	43	1	刺激方案	1	293.182	＞10天	11	＞3000	3225	HCG	2	1	1	继发不孕	0.33	≤24	23.4	女方因素	2	8.45	778	0.45	2	8.11	4.37	60	4	4	9.8	A	IVF	2	0	1	0	1	1	0	否	是	移植	未妊娠
1841	0	2017040012	任晓军	≥35	43	3	拮抗剂方案	2	150	≤10天	5	≤3000	750	HCG	3	1	1	继发不孕	0.07	≤24	19.8	女方因素	2	21.41	463	0.76		16.6	4.37	88.08	4	2	11.3	A		0	0	0	0	0	0	0	是		未取卵
2106	0	2016110164	任晓军	≥35	42	2	刺激方案	1	150	≤10天	6	≤3000	900	HCG	3	1	1	继发不孕	0.07	≤24	19.8	女方因素	1	7.35	458	0.42	2	16.6	4.37	88.08	4	2	10.8	A	IVF	0	0	0	0	0	0	0	是		无可移植胚胎
2112	0	2018050055	刘金凤	≥35	40	1	降调节方案	3	150	≤10天	10	≤3000	1500	HCG	2	2	1	继发不孕	0.9	≤24	23.8	女方因素	1	24.45	451	1.06	1	17.16	4.37	78	4	3	9.3	A	IVF	0	0	0	0	0	0	0	是		未受精
2257	1	2018040280	任晓军	≥35	44	6	拮抗剂方案	2	319.231	＞10天	13	＞3000	4150	双扳机	3	1	1	继发不孕	0.21	≤24	19.8	女方因素	1	17.48	339	1.09	0	16.6	4.37	88.08	4	2				0	0	0	0	0	0	0	是		未取到卵
443	1	2017050099	王晓峰	≥35	42	1	降调节方案	3	350	≤10天	8	≤3000	2800	HCG	2	3	2	继发不孕	0.47	≤24	22.6	女方因素	6	8.22	1846.72	1.08	5	10.5	4.39	78	4	4	16.9	A-B	IVF	5	0	2	1	0	0	0	否	否	全胚冷冻
1115	0	2018070141	王晓峰	≥35	43	5	降调节方案	3	168.75	＞10天	16	≤3000	2700	HCG	3	3	2	继发不孕	0.67	≤24	22.6	女方因素	4	6.64	1392	0.45	4	10.5	4.39	99.09	4	4	8.9	B	IVF	1	0	3	0	0	0	0	否	否	全胚冷冻
1622	1	C00005022	王晓峰	≥35	44	6	降调节方案	3	383.333	≤10天	9	＞3000	3450	HCG	3	3	2	继发不孕	0.84	≤24	22.6	女方因素	2	8.72	945	0.64	2	10.5	4.39	78	4	4	9.9	A-B	IVF	2	0	2	0	0	0	0	否	否	全胚冷冻
1774	1	2018020011	王晓峰	≥35	43	2	降调节方案	3	435	≤10天	5	≤3000	2175	HCG	3	3	2	继发不孕	0.12	≤24	22.6	男方因素	2	6.12	594	0.13	2	10.5	4.39	47.4	4	4	13.1	A-B	ICSI	1	0	1	0	1	1	0	否	是	移植	未妊娠
2013	0	2018060201	王晓峰	≥35	43	4	降调节方案	3	150	≤10天	9	≤3000	1350	HCG	3	3	2	继发不孕	0.45	≤24	22.6	女方因素	1	14.35	841	0.38		10.5	4.39	59.09	4	4	13.4	B-C		0	0	0	0	0	0	0	是		未取卵
2024	1	2018050006	王晓峰	≥35	43	3	降调节方案	3	337.5	≤10天	10	＞3000	3375	HCG	3	3	2	继发不孕	0.80	≤24	22.6	女方因素	1	8.87	738	0.8	0	10.5	4.39	78	4	4	7			0	0	0	0	0	0	0	是		未取到卵
1069	1	C00009872	徐春红	≥35	45	3	刺激方案	1	450	≤10天	9	＞3000	4050	HCG	2	2	1	继发不孕	0.75	＞24	29.8	女方因素	4	0.88	1586	1.07	4	9.84	4.4	13	4	7	0.68	B	IVF	1	0	1	1	0	0	0	否	否	全胚冷冻
1347	1	C00006654	何华珍	≥35	49	2	刺激方案	1	375	≤10天	9	＞3000	3375	HCG	1	6	2	继发不孕	0.31	≤24	19.6	女方因素	3	28.6	600	1.45	3	18.9	4.4	35	4	4	0.41	B	IVF	3	0	2	0	0	0	0	否	否	全胚冷冻
2081	1	2017120027	吴翠霞	≥35	44	2	拮抗剂方案	2	343.75	＞10天	12	＞3000	4125	HCG	3	2	1	继发不孕	0.680	≤24	19.9	混合因素	1	11.05	514	0.84		16.36	4.4	61.55	4	3	7.3	A		0	0	0	0	0	0	0	是		未取卵
1893	0	2016070166	汲君	≥35	46	2	刺激方案	1	270	≤10天	10	≤3000	2700	HCG	3	3	0	继发不孕	0.61	≤24	21.4	女方因素	2	22.67	196	1.42		15.9	4.42	42	4	3	6.5	A		0	0	0	0	0	0	0	是		未取卵
1650	1	C00013468	张玉华	≥35	44	1	刺激方案	1	332.143	≤10天	7	≤3000	2325	HCG	3	3	1	继发不孕	1.01	＞24	26.8	女方因素	2	8.8	865	0.88	4	7.77	4.43	106.43	4	7	6.1	B	IVF	3	0	1	0	0	0	0	否	否	全胚冷冻
2242	0	C00014805	张玉华	≥35	44	2	拮抗剂方案	2	262.5	≤10天	8	≤3000	2100	双扳机	3	3	1	继发不孕	0.12	＞24	26.8	女方因素	1	3.57	478	0.5	2	7.77	4.43	76.43	4	7	10.6	A	IVF	0	0	0	0	0	0	0	是		无可移植胚胎
1189	0	C00016488	柳萌萌	≥35	40	1	刺激方案	1	225	≤10天	8	≤3000	1800	HCG	10	0	0	原发不孕	0.29	≤24	21.2	女方因素	4	1.9	1101	0.67	3	17.64	4.45	41	4	7	10	A	IVF	0	0	0	0	0	0	0	是		无可移植胚胎
1666	0	C00006408	黄喜欢	≥35	37	3	刺激方案	1	281.25	≤10天	8	≤3000	2250	HCG	10	0	0	原发不孕	1.76	≤24	22.3	混合因素	2	7.24	833	1.26	2	9.99	4.45	67	4	4	4.7	A-B	ICSI	2	0	1	0	0	0	0	否	否	全胚冷冻
2070	0	C00011978	郝照华	≥35	43	2	拮抗剂方案	2	150	≤10天	9	≤3000	1350	HCG	3	0	0	原发不孕	0.78	≤24	21.5	混合因素	1	31.85	562	0.56	1	13	4.45	22	4	4	13	A-B	ICSI	0	0	0	0	0	0	0	是		无可移植胚胎
1138	1	C00004315	朱翠珍	≥35	46	1	拮抗剂方案	2	300	＞10天	17	＞3000	5100	双扳机	3	4	1	继发不孕	0.75	≤24	22.5	男方因素	4	3.38	1317	0.52	3	9.76	4.47	79	4	8	8.9	A	ICSI	3	0	0	0	0	0	0	是		无可移植胚胎
1721	0	2016020160	支红燕	≥35	48	3	降调节方案	3	184.091	＞10天	11	≤3000	2025	HCG	1	5	1	继发不孕	0.19	≤24	21.2	混合因素	2	12.93	711	1.85		6.18	4.48	87	4	2	11.1	B		0	0	0	0	0	0	0	是		未取卵
1495	1	C00012040	贺晓方	≥35	39	1	刺激方案	1	300	≤10天	10	≤3000	3000	HCG	9	0	0	原发不孕	0.01	≤24	20.7	女方因素	3	26.69	968	0.92	1	12.8	4.49	41	4	3	0.46	B	IVF	0	0	0	0	0	0	0	是		无可移植胚胎
1561	0	C00003765	王淑霞	≥35	42	2	刺激方案	1	150	≤10天	7	≤3000	1050	HCG	3	2	1	继发不孕	1.12	＞24	25.9	女方因素	3	5.18	1105	0.95	2	8.62	4.49	90.1	4	4	8	B	IVF	0	0	1	0	0	0	0	否	否	全胚冷冻
1956	1	2018060185	王淑霞	≥35	42	1	刺激方案	1	300	≤10天	7	≤3000	2100	HCG	3	2	1	继发不孕	0.16	＞24	25.9	女方因素	2	6.29	494	0.36	1	8.62	4.49	50.1	4	4	9.3	A-B	IVF	1	0	1	1	0	0	0	否	否	全胚冷冻
599	1	2017050135	郭淑蕾	≥35	47	1	降调节方案	3	325	≤10天	10	＞3000	3250	HCG	2	1	1	继发不孕	1.11	＞24	31.2	男方因素	6	6.91	1519	0.84	4	10.45	4.5	55.42	4	6	14.7	B	ICSI	3	0	2	1	2	2	0	否	是	移植	未妊娠
2043	1	C00017983	刘丹丹	≥35	35	1	刺激方案	1	300	≤10天	4	≤3000	1200	双扳机	5	0	0	原发不孕	0.94	≤24	20.7	女方因素	1	20.85	361	0.52		5.26	4.5	31.76	4	6	9.2	A		0	0	0	0	0	0	0	是		未取卵
1263	0	2017050067	艾春丽	≥35	40	3	拮抗剂方案	2	250	≤10天	5	≤3000	1250	HCG	3	3	2	继发不孕	0.6	＞24	24.4	混合因素	3	5.03	884	0.29	2	11.23	4.51	42	4	4	9.3	A	ICSI	2	0	2	1	2	2	0	否	是	移植	已妊娠	临床妊娠	宫内妊娠	单胚胎停
1613	0	C00010368	李永菊	≥35	47	2	刺激方案	1	266.667	≤10天	6	≤3000	1600	HCG	3	5	1	继发不孕	0.64	＞24	24.5	女方因素	2	4.51	979	0.37	2	18.67	4.51	97.9	4	3	8.5	A-B	IVF	1	0	1	0	0	0	0	否	否	全胚冷冻
1935	1	C00011174	李永菊	≥35	47	3	刺激方案	1	368.75	≤10天	8	≤3000	2950	HCG	9	5	1	继发不孕	0.59	＞24	24.5	女方因素	2	6.36	433	0.67	2	18.67	4.51	97.9	4	3	9.4	A	IVF	1	0	0	0	0	0	0	是		无可移植胚胎
2057	1	C00012100	李永菊	≥35	48	5	拮抗剂方案	2	432.5	≤10天	10	＞3000	4325	HCG	10	5	1	继发不孕	0.06	＞24	24.5	混合因素	1	9.92	621	0.32	1	18.67	4.51	97.9	4	3	1.34	A	ICSI	1	0	1	0	1	1	0	否	是	移植	未妊娠
2090	1	C00011736	李永菊	≥35	48	4	刺激方案	1	360	≤10天	10	＞3000	3600	HCG	10	5	1	继发不孕	0.55	＞24	24.5	女方因素	1	9.24	494	0.26	1	18.67	4.51	97.9	4	3	0.74	B	IVF	1	0	1	0	0	0	0	否	否	全胚冷冻
1333	1	C00017426	李双双	＜35	31	1	降调节方案	3	300	＞10天	13	＞3000	3900	HCG	6	0	0	原发不孕	0.87	≤24	21.6	女方因素	3	1.6	647.05	0.9	3	6.61	4.52	30	3	5	12.5	A	IVF	1	0	1	1	0	0	0	否	否	全胚冷冻
1515	0	C00017891	高世芹	≥35	41	4	刺激方案	1	168.75	≤10天	8	≤3000	1350	HCG	4	1	0	继发不孕	0.29	≤24	21	混合因素	3	8.64	862.71	1.59	3	11.9	4.52	44	4	6	0.65	A	ICSI	3	0	2	0	0	0	0	否	否	全胚冷冻
307	1	C00011954	薛爱华	≥35	48	3	刺激方案	1	300	≤10天	8	≤3000	2400	HCG	3	2	1	继发不孕	0.33	＞24	25	女方因素	7	6.07	2379	0.6	5	10.12	4.54	17	4	8	0.52	A	IVF	4	0	2	1	0	0	0	否	否	全胚冷冻
314	1	C00009015	薛爱华	≥35	47	1	刺激方案	1	300	≤10天	9	≤3000	2700	HCG	3	2	1	继发不孕	0.74	＞24	25	女方因素	7	6.79	2231	0.56	7	10.12	4.54	17	4	8	0.57	A	IVF	3	0	2	0	0	0	0	否	否	全胚冷冻
821	1	C00018907	殷汝芳	≥35	40	1	刺激方案	1	450	＞10天	11	＞3000	4950	HCG	13	0	0	原发不孕	0.61	≤24	19.8	女方因素	5	10.25	1493.4	1.33	2	11.17	4.54	38.84	4	6	5.6	A	IVF	0	0	0	0	0	0	0	是		无可移植胚胎
1207	1	C00010238	徐艳	≥35	47	2	刺激方案	1	292.5	≤10天	10	≤3000	2925	双扳机	2	4	0	继发不孕	0.32	≤24	24	女方因素	4	0.86	1013	0.64	4	9.86	4.54	44	4	8	5.8	A	IVF	2	0	2	1	0	0	0	否	否	全胚冷冻
1459	0	C00011251	薛爱华	≥35	48	2	刺激方案	1	225	≤10天	9	≤3000	2025	HCG	3	2	1	继发不孕	0.3	＞24	25	女方因素	3	1.68	968	1.14	3	10.12	4.54	17	4	8	0.8	A-B	IVF	0	0	2	0	0	0	0	否	否	全胚冷冻
2209	1	2017110181	张雅林	≥35	39	3	降调节方案	3	352.5	≤10天	10	＞3000	3525	HCG	2	2	1	继发不孕	0.62	＞24	31.2	男方因素	1	9.23	243	0.73	1	16.85	4.54	87.92	4	4	10.5	B	ICSI	1	0	1	0	1	1	0	否	是	移植	未妊娠
1537	1	2017090211	姜金玲	≥35	42	1	拮抗剂方案	2	300	≤10天	7	≤3000	2100	HCG	1	2	1	继发不孕	0.92	≤24	20.3	男方因素	3	5.87	1189	0.52	2	9.59	4.55	52.32	4	6	11.8	A	ICSI	2	1	1	0	0	0	0	否	否	全胚冷冻
1755	1	2016060111	史希焕	＜35	25	4	刺激方案	1	337.5	≤10天	10	＞3000	3375	HCG	3	3	0	继发不孕	0.11	＞24	24.4	女方因素	2	2.6	622	0.63	2	12.67	4.55	45.67	3	4	11	A	IVF	0	0	0	0	0	0	0	是		未受精
2136	1	C00012867	张艳明	≥35	47	4	刺激方案	1	322.5	≤10天	10	＞3000	3225	HCG	2	6	1	继发不孕	0.14	＞24	27.2	混合因素	1	8.96	396	0.58	1	16.25	4.55	24	4	3	6.9	A-B	ICSI	1	0	1	1	0	0	0	否	否	全胚冷冻
2205	0	2016010053	吴绪连	≥35	48	1	降调节方案	3	112.5	≤10天	6	≤3000	675	HCG	1	1	1	继发不孕	0.19	≤24	20.8	混合因素	1	19.25	251	1.29		13.43	4.55	67	4	4	5.8	A		0	0	0	0	0	0	0	是		未取卵
654	1	2016050149	李亚霜	≥35	43	4	刺激方案	1	412.5	＞10天	12	＞3000	4950	HCG	5	4	1	继发不孕	0.39	≤24	22	女方因素	5	1.33	718	0.62	2	16.3	4.56	69.63	4	4	13.7	B	IVF	1	0	1	0	0	0	0	否	否	全胚冷冻
1504	1	2016120144	于艳	≥35	36	2	降调节方案	3	312.5	≤10天	8	≤3000	2500	HCG	2	4	1	继发不孕	0.75	≤24	21.7	混合因素	3	1.92	948	1.49	4	5.57	4.56	84.41	4	6	13.4	B	ICSI	2	0	1	0	1	1	0	否	是	移植	未妊娠
1858	1	2016110213	李亚霜	≥35	47	6	刺激方案	1	428.571	＞10天	14	＞3000	6000	HCG	5	4	1	继发不孕	0.07	≤24	22	混合因素	2	23.34	383	3.93		16.3	4.56	69.63	4	2	11.6	B		0	0	0	0	0	0	0	是		未取卵
1661	0	C00018198	徐淑玲	≥35	44	1	刺激方案	1	150	≤10天	8	≤3000	1200	HCG	1	3	3	继发不孕	1.090	＞24	24.2	男方因素	2	13.51	840.48	1.34	3	12.12	4.57	85	4	5	6.6	B	ICSI	2	0	2	1	0	0	0	否	否	全胚冷冻
1890	0	C00019471	徐淑玲	≥35	45	2	拮抗剂方案	2	225	≤10天	8	≤3000	1800	HCG	1	4	3	继发不孕	0.33	＞24	26	女方因素	2	3.85	409.3	0.65	1	12.12	4.57	85	4	5	10.4	A	IVF	0	0	0	0	0	0	0	是		无可移植胚胎
1952	1	C00016091	李新文	＜35	31	4	刺激方案	1	400	≤10天	9	＞3000	3600	HCG	3	0	0	原发不孕	1.0	≤24	21.8	混合因素	2	35.21	503.17	1.71	0	11.62	4.58	71	3	3	0.82	A-B		0	0	0	0	0	0	0	是		未取到卵
2235	0	C00011051	李新文	＜35	30	1	刺激方案	1	150	≤10天	7	≤3000	1050	HCG	3	0	0	原发不孕	0.63	≤24	21.8	女方因素	1	19.49	359	1.48	2	11.62	4.58	71	3	6	0.89	B	IVF	0	0	0	0	0	0	0	是		未受精
937	0	C00005602	孟颜	≥35	37	1	刺激方案	1	150	≤10天	5	≤3000	750	双扳机	2	4	1	继发不孕	1.12	＞24	28	女方因素	4	9.18	823	1.64	4	11.82	4.59	17.33	4	6	8.4	B	IVF	2	0	2	0	0	0	0	否	否	全胚冷冻
1931	0	2017090284	王海芳	≥35	46	3	刺激方案	1	180	≤10天	10	≤3000	1800	HCG	1	0	0	继发不孕	0.15	＞24	26.4	男方因素	2	2.47	444.65	0.56	3	13.33	4.59	79.69	4	7	8.8	B	ICSI	3	0	1	0	1	1	0	否	是	移植	未妊娠
1968	0	C00006893	孟颜	≥35	37	2	刺激方案	1	212.5	≤10天	6	≤3000	1275	双扳机	2	4	1	继发不孕	0.29	＞24	28	女方因素	2	6.48	464	0.55	3	11.82	4.59	17.33	4	5	15.8	B	IVF	3	0	2	1	0	0	0	否	否	全胚冷冻
2173	0	2017120019	王海芳	≥35	46	4	刺激方案	1	150	≤10天	10	≤3000	1500	HCG	1	0	0	继发不孕	0.34	＞24	26.4	女方因素	1	2.27	316	0.37	1	13.33	4.59	79.69	4	7	8.6	B	IVF	1	0	1	0	0	0	0	否	否	全胚冷冻
990	1	2016110017	李翠香	≥35	46	3	降调节方案	3	600	≤10天	10	＞3000	6000	HCG	1	4	1	继发不孕	0.806	≤24	23.4	男方因素	4	5.5	1317	0.84	3	9.68	4.61	29	4	3	6.3	B	ICSI	1	0	0	0	0	0	0	是		无可移植胚胎
1132	1	2016080011	李翠香	≥35	46	1	拮抗剂方案	2	393.75	≤10天	8	＞3000	3150	HCG	1	4	1	继发不孕	0.27	≤24	23.4	混合因素	4	2.85	1339	0.8	3	9.68	4.61	29	4	3	5.9	A-B	ICSI	1	0	0	0	0	0	0	是		无可移植胚胎
1226	1	2014110127	李芳	＜35	28	1	降调节方案	3	375	≤10天	7	≤3000	2625	HCG	8	0	0	原发不孕	0.56	≤24	19.2	不明原因	3	5.43	974	2.33	1	15.04	4.61	67.45	3	4	16.2		IVF	0	0	0	0	0	0	0	是		未受精
2010	1	2016090261	李翠香	≥35	46	2	降调节方案	3	421.053	＞10天	19	＞3000	8000	HCG	1	4	1	继发不孕	0.7	≤24	23.4	男方因素	1	6.47	920	0.92	1	9.68	4.61	29	4	3	5.6	A-B	ICSI	2	0	2	0	0	0	0	否	否	全胚冷冻
413	0	C00007851	谭宁	≥35	41	1	刺激方案	1	180	≤10天	10	≤3000	1800	HCG	6	1	0	继发不孕	0.33	＞24	27.2	女方因素	7	6.35	1186	0.39	2	11.65	4.62	68	4	5	0.9	B	IVF	0	1	1	0	0	0	0	否	否	全胚冷冻
1338	1	C00011040	谭宁	≥35	42	3	降调节方案	3	360	≤10天	10	＞3000	3600	HCG	6	1	0	继发不孕	0.940	＞24	27.2	不明原因	3	1.44	636	0.46	3	11.65	4.62	68	4	5	12.2	B	IVF	1	0	2	0	2	2	0	否	是	移植	未妊娠
1654	1	C00012274	谭宁	≥35	42	4	降调节方案	3	301.923	＞10天	13	＞3000	3925	HCG	6	1	0	继发不孕	0.45	＞24	27.2	不明原因	2	6.67	853	0.42	2	11.65	4.62	68	4	5	14.5	A-B	IVF	2	0	2	0	0	0	0	否	否	全胚冷冻
1659	1	C00012631	徐瑞华	≥35	38	3	刺激方案	1	300	≤10天	8	≤3000	2400	HCG	13	0	0	原发不孕	1.03	≤24	21.4	混合因素	2	7.79	845	0.23	1	12.09	4.62	55	4	5	1.3	A	ICSI	1	0	1	0	1	1	0	否	是	移植	已妊娠	临床妊娠	宫内妊娠	单胎宫内妊娠
1662	1	C00015383	谭宁	≥35	42	5	刺激方案	1	321.429	≤10天	7	≤3000	2250	HCG	6	1	0	继发不孕	0.33	＞24	27.2	女方因素	2	5.31	839	0.54	2	11.65	4.62	68	4	5	9.2	B	IVF	2	0	1	0	0	0	0	否	否	全胚冷冻
1820	1	C00009893	谭宁	≥35	41	2	拮抗剂方案	2	392.045	＞10天	11	＞3000	4312.5	HCG	6	1	0	继发不孕	1.01	＞24	27.2	女方因素	2	4.91	510	0.29	0	11.65	4.62	68	4	5	11.8	B		0	0	0	0	0	0	0	是		未取到卵
1642	0	C00004255	杨宝凤	≥35	45	1	刺激方案	1	254.167	≤10天	9	≤3000	2287.5	HCG	3	2	1	继发不孕	0.52	≤24	23.6	女方因素	2	5.77	888	0.61	1	15.94	4.63	29	4	3	10.1	B	IVF	0	0	0	0	0	0	0	是		无可移植胚胎
1876	1	C00004775	杨宝凤	≥35	45	2	拮抗剂方案	2	300	≤10天	10	≤3000	3000	双扳机	3	2	1	继发不孕	0.23	≤24	23.6	混合因素	2	25.07	318	0.69		15.94	4.63	29	4	3	11.4	A-B		0	0	0	0	0	0	0	是		未取卵
1137	1	C00017201	禇延苓	≥35	41	4	刺激方案	1	450	≤10天	10	＞3000	4500	HCG	1	4	0	继发不孕	0.29	≤24	22.9	女方因素	4	17.24	1317	1.06	0	12.58	4.64	13	4	6	6	A		0	0	0	0	0	0	0	是		未取到卵
1368	1	C00012242	禇延苓	≥35	40	3	刺激方案	1	300	＞10天	11	＞3000	3300	HCG	1	4	0	继发不孕	1.13	≤24	22.9	女方因素	3	0.32	509	1.26	2	12.58	4.64	13	4	6	0.88	B	IVF	2	0	0	0	0	0	0	是		无可移植胚胎
1633	0	C00006782	高洁	≥35	38	3	刺激方案	1	218.182	＞10天	11	≤3000	2400	HCG	3	2	0	继发不孕	1.18	＞24	25.8	女方因素	2	10.98	902	0.53	1	17.56	4.64	24	4	6	4.3	B	IVF	1	0	0	0	0	0	0	是		无可移植胚胎
1724	1	C00012062	高洁	≥35	39	6	拮抗剂方案	2	415.909	＞10天	11	＞3000	4575	HCG	5	2	0	继发不孕	0.45	＞24	25.8	女方因素	2	1.79	704	0.32	3	17.56	4.64	24	4	6	8.1	A	IVF	3	0	1	0	0	0	0	否	否	全胚冷冻
1804	0	C00016582	张芬	≥35	42	4	拮抗剂方案	2	163.636	＞10天	11	≤3000	1800	HCG	6	3	1	继发不孕	1.01	＞24	26.7	女方因素	2	3.41	534	0.54	2	10.98	4.64	32	4	6	10.5	A-B	IVF	2	0	2	0	0	0	0	否	否	全胚冷冻
2139	1	C00004583	高洁	≥35	37	2	拮抗剂方案	2	306.25	＞10天	12	＞3000	3675	双扳机	3	2	0	继发不孕	0.5	＞24	25.8	女方因素	1	12.85	388	0.95	0	17.56	4.64	24	4	6	8	A		0	0	0	0	0	0	0	是		未取到卵
1940	0	2018070046	张小平	≥35	44	2	刺激方案	1	286.364	＞10天	11	＞3000	3150	HCG	2	3	1	继发不孕	0.221	≤24	20	女方因素	2	3.25	414	1.68	1	18.08	4.65	78.43	4	4	13.7	B	IVF	1	0	1	0	0	0	0	否	否	全胚冷冻
2019	0	2018050052	张小平	≥35	44	1	刺激方案	1	150	≤10天	10	≤3000	1500	HCG	2	3	1	继发不孕	0.32	≤24	20	女方因素	1	11.83	774	1.03	2	18.08	4.65	78.43	4	4	6.2	B	IVF	1	0	1	1	0	0	0	否	否	全胚冷冻
684	1	C00016484	李胜清	≥35	46	1	刺激方案	1	300	＞10天	11	＞3000	3300	HCG	7	3	2	继发不孕	0.84	≤24	23.8	女方因素	5	8.5	1796	2.41	4	14.15	4.66	40	4	9	0.5	A-B	IVF	3	0	2	2	0	0	0	否	否	全胚冷冻
695	0	C00018316	李胜清	≥35	46	2	拮抗剂方案	2	288.462	＞10天	13	＞3000	3750	HCG	7	3	2	继发不孕	0.99	≤24	23.8	女方因素	5	2.39	1734	1.77	3	14.15	4.66	40	4	9	8.9	B	IVF	2	0	2	0	2	2	0	否	是	移植	未妊娠
1197	1	2016030179	张春莉	≥35	40	1	刺激方案	1	300	≤10天	7	≤3000	2100	HCG	6	4	1	继发不孕	1.08	＞24	24.3	女方因素	4	2.5	1062	1.2	3	6.46	4.66	34.76	4	7	8.2	A	IVF	3	0	1	0	1	1	0	否	是	移植	已妊娠	临床妊娠	宫内妊娠	单胎宫内妊娠
1010	1	2016090108	宋宗玲	≥35	43	1	降调节方案	3	309.375	≤10天	8	≤3000	2475	HCG	1	2	0	继发不孕	0.21	≤24	23.3	混合因素	4	6.94	1232.93	1.37	4	17.42	4.67	66.6	4	5	9.5	B	ICSI	2	0	1	0	0	0	0	否	否	全胚冷冻
1963	1	2017110224	张园园	＜35	29	1	降调节方案	3	414.167	＞10天	15	＞3000	6212.5	HCG	4	0	0	继发不孕	0.75	＞24	24.7	男方因素	2	0.26	477	0.62	2	5.42	4.67	81.1	3	6	4.5		IVF	2	0	0	0	0	0	0	是		无可移植胚胎
1360	1	2018050022	徐春红	≥35	43	1	降调节方案	3	375	≤10天	10	＞3000	3750	HCG	1	2	1	继发不孕	0.95	＞24	29.8	女方因素	3	0.4	550	0.54	3	13.7	4.68	66.06	4	7	10.7	B	IVF	1	0	1	0	1	1	0	否	是	移植	未妊娠
1381	0	2017060291	高乃珲	≥35	39	1	降调节方案	3	222.727	＞10天	11	≤3000	2450	HCG	1	0	0	原发不孕	0.45	≤24	20.8	女方因素	3	25.69	329	0.76	1	12.8	4.68	67.09	4	3	6.3	A	IVF	6	0	2	0	0	0	0	否	否	全胚冷冻
592	0	2016090157	张红霞	≥35	47	2	刺激方案	1	225	≤10天	8	≤3000	1800	HCG	3	3	1	继发不孕	0.21	＞24	25.3	女方因素	6	0.76	1555	0.64	7	14.22	4.69	99.09	4	4	13.5	A	IVF	6	0	4	2	2	2	0	否	是	移植	未妊娠
1193	0	2017090227	杨秀华	≥35	41	1	降调节方案	3	250	≤10天	9	≤3000	2250	HCG	1	3	1	继发不孕	0.4	≤24	19.9	女方因素	4	3.15	1082	0.37	4	12.23	4.69	86.76	4	5	11.9	A-B	IVF	4	0	4	1	0	0	0	否	否	全胚冷冻
1460	0	2018050064	张金玲	≥35	40	2	降调节方案	3	245.385	＞10天	13	＞3000	3190	HCG	2	2	1	继发不孕	0.917	≤24	21.5	女方因素	3	1.4	968	0.5	4	10.05	4.69	33.7	4	7	9.7	B	IVF	3	0	1	0	0	0	0	否	否	全胚冷冻
1539	0	2016040294	张红霞	≥35	47	1	刺激方案	1	231.25	＞10天	12	≤3000	2775	HCG	3	3	1	继发不孕	0.32	＞24	25.3	女方因素	3	1.3	1186	0.44	1	14.22	4.69	99.09	4	3	12.6	A	IVF	1	0	1	0	1	1	0	否	是	移植	未妊娠
467	1	2018060118	董云娟	≥35	45	2	刺激方案	1	300	≤10天	9	≤3000	2700	HCG	1	2	0	继发不孕	0.91	≤24	22.6	女方因素	6	9.78	1839	3.39	6	7.9	4.7	89	4	9	7	B	IVF	3	0	1	1	0	0	0	否	否	全胚冷冻
721	0	C00007827	董云娟	≥35	46	3	刺激方案	1	225	≤10天	9	≤3000	2025	HCG	1	2	0	继发不孕	1.05	≤24	22.6	女方因素	5	11.98	1561	1.18	6	7.9	4.7	89	4	11	0.76	A	IVF	4	0	3	2	0	0	0	否	否	全胚冷冻
1243	0	2018020098	董云娟	≥35	44	1	刺激方案	1	233.333	≤10天	9	≤3000	2100	HCG	1	2	0	继发不孕	0.14	≤24	22.6	女方因素	3	11.79	930	1.04	5	7.9	4.7	89	4	7	6.9	B	IVF	1	0	1	0	0	0	0	否	否	全胚冷冻
1605	1	C00003918	张玉爱	≥35	44	2	刺激方案	1	300	≤10天	8	≤3000	2400	HCG	9	2	1	继发不孕	0.61	＞24	26.7	混合因素	2	8.63	994	0.76	0	12.72	4.7	31	4	6	5	A		0	0	0	0	0	0	0	是		未取到卵
1658	1	C00003415	张玉爱	≥35	44	1	刺激方案	1	300	＞10天	11	＞3000	3300	双扳机	9	2	1	继发不孕	0.6	＞24	26.7	混合因素	2	17.38	847	1.36	0	12.72	4.7	31	4	6	5.7	A		0	0	0	0	0	0	0	是		未取到卵
1155	1	C00016200	刘俊芝	≥35	42	4	拮抗剂方案	2	291.667	≤10天	9	≤3000	2625	HCG	1	4	1	继发不孕	0.54	≤24	24	女方因素	4	4.46	1244	0.57	4	9.5	4.71	40	4	7	7.8	A	IVF	4	0	3	2	2	2	0	否	是	移植	已妊娠	临床妊娠	宫内妊娠	单胎宫内妊娠
2126	1	2016050179	袁红彬	≥35	45	1	刺激方案	1	366.346	＞10天	13	＞3000	4762.5	双扳机	5	6	1	继发不孕	0.66	＞24	24.4	混合因素	1	9.2	422	0.56	1	14.5	4.71	40	4	3	3.2		ICSI	0	0	0	0	0	0	0	是		未受精
2200	0	C00006659	史如芹	≥35	50	2	刺激方案	1	225	≤10天	10	≤3000	2250	HCG	7	1	0	继发不孕	0.59	＞24	26.2	男方因素	1	11.19	258	0.49	1	9.49	4.71	12	4	2	8	B	ICSI	0	0	0	0	0	0	0	是		无可移植胚胎
2227	0	C00010547	王凤麟	≥35	46	3	刺激方案	1	225	≤10天	6	≤3000	1350	HCG	0	1	0	继发不孕	0.11	＞24	25.4	混合因素	1	47.56	170	0.45	0	11.73	4.71	50.5	4	3	9.7	B		0	0	0	0	0	0	0	是		未取到卵
2277	0	2017100193	史如芹	≥35	48	1	刺激方案	1	170.455	＞10天	11	≤3000	1875	HCG	7	1	0	继发不孕	0.16	＞24	26.2	女方因素	1	7.92	435	0.69	0	9.49	4.71	12	4	2				0	0	0	0	0	0	0	是		未取到卵
1909	0	2016120081	徐翠青	≥35	37	1	降调节方案	3	150	＞10天	12	≤3000	1800	HCG	12	1	0	继发不孕	1.18	≤24	21.2	女方因素	2	15.28	506	1.75	3	13.82	4.72	46	4	6	4.4	A	IVF	2	0	2	0	0	0	0	否	否	全胚冷冻
1964	1	C00003370	苟书梅	≥35	42	1	拮抗剂方案	2	450	＞10天	11	＞3000	4950	HCG	4	2	0	继发不孕	0.93	≤24	22.3	女方因素	2	5.33	473	0.93	1	10.05	4.72	20	4	9	0.7	A	IVF	0	0	0	0	0	0	0	是		无可移植胚胎
664	1	C00011277	牛华	≥35	37	2	刺激方案	1	300	≤10天	8	≤3000	2400	HCG	3	2	1	继发不孕	0.91	≤24	18.6	女方因素	5	11.34	1631	1.03	4	9	4.73	61.1	4	7	4.2	B	IVF	2	0	2	1	0	0	0	否	否	全胚冷冻
159	0	C00012263	杨春荣	≥35	43	3	拮抗剂方案	2	212.5	≤10天	8	≤3000	1700	HCG	3	1	1	继发不孕	0.82	≤24	23	女方因素	8	3.8	1823	0.97	4	12.08	4.74	69	4	7	1.08	A-B	IVF	1	0	1	0	0	0	0	否	否	全胚冷冻
731	1	C00009499	杨春荣	≥35	42	2	刺激方案	1	450	＞10天	12	＞3000	5400	HCG	3	1	1	继发不孕	0.55	≤24	23	女方因素	5	8.43	1503	0.58	4	12.08	4.74	69	4	7	0.97	A	IVF	2	0	2	0	0	0	0	否	否	全胚冷冻
1624	1	C00011858	王慧君	≥35	47	1	刺激方案	1	387.5	≤10天	6	≤3000	2325	HCG	3	1	1	原发不孕	0.47	≤24	24	女方因素	2	3.64	937	0.57	2	13.32	4.74	56	4	6	0.6	A-B	IVF	1	0	1	0	0	0	0	否	否	全胚冷冻
211	1	2018030206	马金玲	≥35	42	3	降调节方案	3	305.357	＞10天	14	＞3000	4275	HCG	13	1	1	继发不孕	0.84	≤24	22.5	男方因素	8	0.98	1790	1.5	5	7.3	4.75	41	4	7	12.7	B	ICSI	2	0	2	0	2	2	0	否	是	移植	未妊娠
1578	1	C00018848	麻晓霞	≥35	43	1	降调节方案	3	352.5	≤10天	10	＞3000	3525	HCG	13	2	1	原发不孕	0.84	≤24	21.1	女方因素	3	7.19	1053.96	1.29	4	16.83	4.75	28.58	4	6	11.8	A	IVF	1	0	0	0	0	0	0	是		无可移植胚胎
1150	1	C00004505	王光爱	≥35	38	2	拮抗剂方案	2	525	≤10天	9	＞3000	4725	HCG	3	2	1	继发不孕	0.68	≤24	20.8	混合因素	4	4.2	1269	0.46	3	7.54	4.77	36	4	6	9.8	A	ICSI	2	0	1	1	1	1	0	否	是	移植	未妊娠
1682	1	C00006382	殷静	＜35	33	1	刺激方案	1	450	≤10天	10	＞3000	4500	HCG	3	2	1	继发不孕	0.74	＞24	24.8	女方因素	2	27.43	792	0.75	1	10.67	4.77	19.18	3	4	0.63	B	IVF	1	0	0	0	0	0	0	否	否	全胚冷冻
1763	1	C00009875	张艳明	≥35	46	3	拮抗剂方案	2	375	≤10天	10	＞3000	3750	HCG	1	6	1	继发不孕	0.52	＞24	27.2	女方因素	2	3.05	608	0.25	2	16.59	4.77	10	4	3	8.2	B	IVF	1	0	1	0	0	0	0	否	否	全胚冷冻
1939	1	C00019389	史建叶	≥35	41	7	刺激方案	1	300	＞10天	12	＞3000	3600	HCG	2	3	0	继发不孕	0.320	≤24	23.3	女方因素	2	6.88	417	0.67	3	11.56	4.77	49.09	4	5	6	C	IVF	1	0	0	0	0	0	0	是		无可移植胚胎
2210	1	C00008419	张艳明	≥35	46	1	拮抗剂方案	2	480.357	＞10天	14	＞3000	6725	双扳机	1	6	1	继发不孕	0.08	＞24	27.2	女方因素	1	4.02	242	0.75	0	16.59	4.77	10	4	3	0.68	B		0	0	0	0	0	0	0	是		未取到卵
1439	1	2017030206	李秋芳	≥35	39	1	降调节方案	3	368.75	＞10天	12	＞3000	4425	HCG	1	2	1	继发不孕	0.77	≤24	20.1	女方因素	3	6.47	930	1.41	4	9.59	4.79	40	4	7	7.8	A	IVF	1	0	0	0	0	0	0	是		无可移植胚胎
1450	0	2018030161	王建玲	≥35	36	1	刺激方案	1	150	≤10天	6	≤3000	900	HCG	1	3	1	继发不孕	0.83	≤24	23.3	女方因素	3	17.14	904	0.87	2	7.39	4.79	47.1	4	6	5	B	IVF	0	0	0	0	0	0	0	是		未受精
2093	0	2017090151	杜红燕	≥35	43	2	刺激方案	1	150	≤10天	6	≤3000	900	HCG	1	3	1	原发不孕	0.411	＞24	24.8	女方因素	1	5.86	485	1.53	1	11.54	4.79	35.42	4	4	8.9	A-B	IVF	1	0	1	1	0	0	0	否	否	全胚冷冻
2159	0	2017060304	杜红燕	≥35	43	1	刺激方案	1	150	≤10天	5	≤3000	750	HCG	1	3	1	原发不孕	0.06	＞24	24.8	女方因素	1	7.69	342	1.17	1	11.54	4.79	35.42	4	4	9.4		IVF	1	0	1	0	0	0	0	否	否	全胚冷冻
1974	1	C00007606	王娟	＜35	30	1	刺激方案	1	450	≤10天	9	＞3000	4050	HCG	3	0	0	原发不孕	1.18	≤24	20.5	女方因素	2	13.32	439	1.4	0	11.16	4.81	47	3	4	0.48	A-B		0	0	0	0	0	0	0	是		未取到卵
765	1	C00011170	王媛媛	≥35	46	4	降调节方案	3	312.5	＞10天	12	＞3000	3750	HCG	2	3	1	继发不孕	0.49	≤24	23.5	混合因素	5	9.75	1836	1.25	4	10.9	4.82	30	4	9	7.6	A-B	ICSI	1	0	1	0	1	1	0	否	是	移植	未妊娠
929	0	2017120182	赵美英	≥35	46	1	降调节方案	3	253.333	＞10天	15	＞3000	3800	HCG	3	3	2	继发不孕	0.49	＞24	26.6	女方因素	4	1.2	870	0.15	2	5.39	4.82	69	4	7	12.2	A-B	IVF	1	0	1	0	1	1	0	否	是	移植	未妊娠
996	1	C00015799	王媛媛	≥35	47	8	刺激方案	1	362.5	≤10天	8	≤3000	2900	HCG	3	3	1	继发不孕	0.89	≤24	23.5	混合因素	4	10.29	1298	1.39	4	10.9	4.82	30	4	9	6.2	A-B	ICSI	3	0	3	0	0	0	0	否	否	全胚冷冻
1637	0	2016040133	苏桂华	≥35	41	3	刺激方案	1	225	≤10天	7	≤3000	1575	HCG	1	1	1	继发不孕	0.26	≤24	18.9	女方因素	2	2.76	895	0.37	3	9.84	4.82	49.09	4	5	9.5	A	IVF	2	0	1	0	1	1	0	否	是	移植	未妊娠
2151	0	2017050044	高玉香	≥35	46	1	刺激方案	1	225	≤10天	6	≤3000	1350	HCG	3	2	1	继发不孕	0.43	＞24	24.2	女方因素	1	5.71	370	0.99	1	11.89	4.82	95.42	4	3	5.6	B	IVF	1	0	1	1	0	0	0	否	否	全胚冷冻
2213	1	2017110190	高玉香	≥35	46	4	刺激方案	1	375	＞10天	14	＞3000	5250	HCG	3	2	1	继发不孕	0.6	＞24	24.2	女方因素	1	8.68	230	0.66	1	11.89	4.82	95.42	4	4	5.6	B	IVF	0	0	0	0	0	0	0	是		无可移植胚胎
2269	0	2017070220	张美	≥35	46	1	刺激方案	1	150	≤10天	8	≤3000	1200	HCG	2	5	1	继发不孕	0.14	＞24	27.3	混合因素	1	2.27	316	0.37	0	16.14	4.82	54	4	2				0	0	0	0	0	0	0	是		未取到卵
1655	0	C00003899	韩洋	≥35	35	3	拮抗剂方案	2	150	≤10天	7	≤3000	1050	HCG	3	2	0	继发不孕	0.65	≤24	19.9	女方因素	2	3.28	849	0.46	1	9.05	4.83	51	4	6	11.7	C	IVF	1	0	1	0	1	1	0	否	是	移植	未妊娠
962	1	2017100236	张秀燕	＜35	28	2	刺激方案	1	415.909	＞10天	11	＞3000	4575	HCG	2	1	0	继发不孕	0.79	≤24	18.9	女方因素	4	1.96	1403	2.33	4	8.38	4.84	43	3	5	12.6	B	IVF	4	0	1	0	0	0	0	否	否	全胚冷冻
1212	1	2017030315	张丹	≥35	36	2	降调节方案	3	300	≤10天	8	≤3000	2400	HCG	1	0	0	原发不孕	0.5	≤24	20.2	男方因素	4	13.25	1159	1.36	4	5.07	4.84	53.76	4	6	7.5	B	ICSI	3	0	2	0	0	0	0	否	否	全胚冷冻
1244	0	2018030022	吴青侠	≥35	49	1	拮抗剂方案	2	177.273	＞10天	11	≤3000	1950	HCG	1	2	2	继发不孕	0.56	＞24	26.2	女方因素	3	2.56	926	0.53	2	12.17	4.84	96.43	4	4	12.1	A	IVF	0	0	0	0	0	0	0	是		无可移植胚胎
1927	0	2017060161	张秀燕	＜35	28	1	刺激方案	1	225	≤10天	5	≤3000	1125	HCG	2	1	0	继发不孕	1.16	≤24	18.9	女方因素	2	4.83	463	1.1	2	8.38	4.84	43	3	5	9.2	B	IVF	1	0	2	0	0	0	0	否	否	全胚冷冻
131	1	C00004187	张敏	≥35	42	4	刺激方案	1	429.545	＞10天	11	＞3000	4725	HCG	5	1	0	继发不孕	1.13	＞24	29.1	女方因素	8	7.89	1690	1.15	6	9.8	4.85	77.07	4	8	0.61	B	IVF	2	0	2	0	0	0	0	否	否	全胚冷冻
1307	0	C00004964	贾希菊	≥35	45	2	拮抗剂方案	2	250	＞10天	12	≤3000	3000	双扳机	1	3	2	继发不孕	0.99	＞24	30.1	女方因素	3	4.82	746	1.03	3	5.99	4.85	68	4	6	10	A-B	IVF	1	0	2	0	2	2	0	否	是	移植	未妊娠
1498	1	2018050017	薛建红	≥35	43	1	降调节方案	3	300	≤10天	5	≤3000	1500	HCG	1	8	2	继发不孕	1.090	＞24	27.9	女方因素	3	2.29	958	2.57	2	9.82	4.85	50.1	4	4	8.6	A	IVF	0	0	0	0	0	0	0	是		无可移植胚胎
1873	0	2018060157	贾希菊	≥35	45	1	拮抗剂方案	2	262.5	＞10天	12	＞3000	3150	双扳机	1	2	2	继发不孕	0.95	＞24	30.1	女方因素	2	2.01	340	0.41	2	5.99	4.85	68	4	6	7.9	A	IVF	1	0	1	1	1	1	0	否	是	移植	已妊娠	临床妊娠	宫内妊娠	单胚胎停
2005	1	2016050170	刘业静	≥35	42	5	刺激方案	1	428.571	≤10天	7	≤3000	3000	双扳机	1	5	1	继发不孕	0.7	＞24	25.4	女方因素	1	7.28	951	1.02	0	15.78	4.85	46.43	4	3	5.5	B		0	0	0	0	0	0	0	是		未取到卵
2133	1	C00006738	贾希菊	≥35	46	4	刺激方案	1	328.846	＞10天	13	＞3000	4275	HCG	1	3	2	继发不孕	0.92	＞24	30.1	女方因素	1	17.22	404	0.28	1	5.99	4.85	68	4	6	8.5	A	IVF	0	0	1	0	1	1	0	否	是	移植	未妊娠
2264	1	2016100020	刘业静	≥35	46	6	降调节方案	3	350	≤10天	9	＞3000	3150	HCG	1	5	1	继发不孕	0.427	＞24	25.4	女方因素	1	16.2	324	0.11		17.89	4.85	78.43	4	3				0	0	0	0	0	0	0	是		未取卵
1171	1	2017110056	侯艳艳	＜35	33	2	降调节方案	3	300	≤10天	8	≤3000	2400	HCG	6	0	0	原发不孕	1.13	≤24	23.8	不明原因	4	0.71	1180	0.57	2	6.63	4.86	37	3	8	10.5	A	IVF	1	0	0	0	0	0	0	是		无可移植胚胎
2052	1	2016110158	邢爱景	≥35	48	3	刺激方案	1	300	≤10天	8	≤3000	2400	HCG	1	0	0	继发不孕	0.54	≤24	22.8	女方因素	1	7.84	651	0.54	1	18.35	4.86	41	4	2	7.1	A	IVF	1	0	1	0	0	0	0	否	否	全胚冷冻
1053	1	2016050236	王凤杰	≥35	39	1	降调节方案	3	350	＞10天	13	＞3000	4550	HCG	6	1	1	继发不孕	0.66	≤24	22.6	女方因素	4	1.3	1706	0.48	1	7	4.87	41.75	4	3	12.6	B	IVF	1	0	0	0	0	0	0	是		无可移植胚胎
1433	1	2016100165	王凤杰	≥35	39	3	降调节方案	3	513.462	＞10天	13	＞3000	6675	HCG	6	1	1	继发不孕	0.46	≤24	22.6	混合因素	3	4.49	945	1.27	2	7	4.87	41.75	4	3	8.3	C	ICSI	1	0	0	0	0	0	0	是		无可移植胚胎
2062	1	2016080150	王凤杰	≥35	39	2	拮抗剂方案	2	337.5	＞10天	12	＞3000	4050	HCG	6	1	1	继发不孕	0.57	≤24	22.6	混合因素	1	1.4	593	0.11	0	7	4.87	91.75	4	3	12.8	B		0	0	0	0	0	0	0	是		未取到卵
2233	0	2017070146	姚冬梅	≥35	40	1	拮抗剂方案	2	150	≤10天	6	≤3000	900	HCG	15	0	0	原发不孕	0.41	≤24	19.8	女方因素	1	4.22	150	0.29	0	15.67	4.87	75.69	4	3	6.4	A		0	0	0	0	0	0	0	是		未取到卵
1649	1	C00006882	赵静	≥35	38	1	拮抗剂方案	2	332.143	≤10天	7	≤3000	2325	HCG	6	2	0	继发不孕	0.60	≤24	20.9	混合因素	2	10.92	865	0.39	2	11	4.88	75	4	3	11.5	A	ICSI	1	0	0	0	1	1	0	否	是	移植	未妊娠
1811	0	2016110208	卞艳艳	＜35	32	2	刺激方案	1	262.5	≤10天	8	≤3000	2100	HCG	2	0	0	原发不孕	0.53	＞24	27.3	男方因素	2	5.15	527	1.65	2	7.88	4.88	55.42	3	3	5.7	A-B	ICSI	1	0	1	0	0	0	0	否	否	全胚冷冻
2069	0	C00011071	赵静	≥35	38	2	刺激方案	1	150	≤10天	5	≤3000	750	HCG	6	2	0	继发不孕	0.46	≤24	20.9	混合因素	1	14.45	569	1.19	1	11	4.88	75	4	3	3.8	B	ICSI	1	0	0	0	0	0	0	是		无可移植胚胎
2098	1	2017050058	卞艳艳	＜35	32	3	刺激方案	1	350	＞10天	24	＞3000	8400	双扳机	2	0	0	原发不孕	0.56	＞24	27.3	女方因素	1	2.9	467	1.41	0	7.88	4.88	93.36	3	3	9.5	B		0	0	0	0	0	0	0	是		未取到卵
2171	1	2016090127	卞艳艳	＜35	32	1	刺激方案	1	333.333	＞10天	18	＞3000	6000	HCG	2	0	0	原发不孕	0.18	＞24	27.3	女方因素	1	5.97	322	0.83	2	7.88	4.88	93.36	3	3	8	B	IVF	0	0	0	0	0	0	0	是		未受精
1219	1	2016030072	李玲玲	＜35	29	1	降调节方案	3	400	＞10天	12	＞3000	4800	HCG	1	4	0	继发不孕	0.62	≤24	21.4	女方因素	4	1.84	1129	0.93	3	14.28	4.9	32	3	5	9	A	IVF	3	0	2	0	2	2	0	否	是	移植	未妊娠
2153	1	2016030100	耿雪	＜35	27	1	降调节方案	3	420	≤10天	10	＞3000	4200	HCG	3	0	0	原发不孕	0.796	≤24	19	女方因素	1	1.86	363	0.32	1	11.9	4.9	78.37	3	5	14.2	A	IVF	1	0	1	0	0	0	0	否	否	全胚冷冻
1720	1	2017110128	王芬	＜35	28	1	刺激方案	1	300	≤10天	8	≤3000	2400	HCG	5	0	0	原发不孕	0.712	≤24	21.1	女方因素	2	16.8	713	1.4	1	8.15	4.92	41.2	3	5	6.5	B	IVF	0	0	0	0	0	0	0	是		无可移植胚胎
999	1	C00011992	王乃凤	≥35	45	2	刺激方案	1	393.75	≤10天	8	＞3000	3150	HCG	6	4	1	原发不孕	0.61	＞24	26.8	女方因素	4	4.36	1290	0.41	2	13.65	4.93	77	4	4	0.49	A-B	IVF	2	0	2	2	0	0	0	否	否	全胚冷冻
1848	0	2017120167	陈红燕	≥35	45	1	刺激方案	1	158.333	≤10天	9	≤3000	1425	HCG	3	1	1	继发不孕	0.48	＞24	27.8	女方因素	2	4.23	435	0.18	1	10.08	4.93	34.76	4	11	10.8	A	IVF	1	0	1	0	1	1	0	否	是	移植	未妊娠
2053	1	C00011765	王乃凤	≥35	45	1	拮抗剂方案	2	357.143	≤10天	7	≤3000	2500	双扳机	6	4	1	原发不孕	0.70	＞24	26.8	女方因素	1	10.5	647	0.44	1	13.65	4.93	77	4	4	0.4	A	IVF	1	0	1	0	0	0	0	否	否	全胚冷冻
655	0	2016060107	王燕	≥35	37	3	降调节方案	3	225	≤10天	8	≤3000	1800	HCG	2	3	1	继发不孕	0.92	＞24	25.3	女方因素	5	1.14	1685	0.3	4	5.99	4.94	55.42	4	7	10.2	A	IVF	4	0	2	0	2	2	0	否	是	移植	未妊娠
750	1	C00018580	张秋梅	≥35	42	2	刺激方案	1	427.273	＞10天	11	＞3000	4700	HCG	3	2	1	继发不孕	0.49	＞24	25	男方因素	5	6.38	1401	0.47	5	12.09	4.94	19.55	4	7	5	A	ICSI	1	0	1	0	0	0	0	否	否	全胚冷冻
1922	1	C00016838	张秋梅	≥35	42	1	刺激方案	1	391.667	＞10天	15	＞3000	5875	HCG	3	2	1	继发不孕	1.04	＞24	25	男方因素	2	9.46	473	1.08	3	12.09	4.94	19.55	4	4	10.8	A	ICSI	2	0	2	0	0	0	0	否	否	全胚冷冻
2040	0	C00003496	杨咏梅	≥35	43	2	拮抗剂方案	2	240	≤10天	5	≤3000	1200	双扳机	1	4	1	继发不孕	0.76	≤24	19.8	混合因素	1	21.65	367	0.46		18.97	4.94	84	4	3	9.1	B		0	0	0	0	0	0	0	是		未取卵
1127	1	2017060028	许艳芳	≥35	45	3	拮抗剂方案	2	333.333	≤10天	9	≤3000	3000	HCG	2	3	2	继发不孕	0.45	＞24	24.8	女方因素	4	0.45	1355	2.84	1	9.69	4.95	56.4	4	7	22.1	B	IVF	0	0	1	0	0	0	0	否	否	全胚冷冻
1190	1	2016100224	许艳芳	≥35	44	2	刺激方案	1	406.25	＞10天	12	＞3000	4875	HCG	2	3	2	继发不孕	0.75	＞24	24.8	女方因素	4	0.88	1099	0.5	6	9.69	4.95	56.4	4	7	11	B	IVF	4	0	4	3	0	0	0	否	否	全胚冷冻
1731	1	C00006125	潘和枝	≥35	40	1	拮抗剂方案	2	425	≤10天	8	＞3000	3400	HCG	3	3	1	原发不孕	1.05	≤24	21.5	女方因素	2	9.75	676	0.6	2	9.57	4.99	67	4	6	7.6	A	IVF	2	0	2	0	2	2	0	否	是	移植	未妊娠
114	1	2016110100	钟爱民	≥35	43	1	降调节方案	3	300	＞10天	12	＞3000	3600	HCG	2	0	0	继发不孕	1.07	≤24	19.1	女方因素	9	1.03	1686	0.8	9	6.99	5.01	68	4	9	10.7	A	IVF	2	0	2	1	2	2	0	否	是	移植	未妊娠
438	1	2018030180	刘秋霞	≥35	39	1	降调节方案	3	422.727	＞10天	11	＞3000	4650	HCG	1	2	0	继发不孕	0.93	＞24	29.6	女方因素	6	0.52	472	0.42	1	7.64	5.01	65.42	4	7	0.93	C	IVF	1	0	1	1	1	1	0	否	是	移植	未妊娠
1738	1	C00013714	杨维华	≥35	48	1	拮抗剂方案	2	375	≤10天	7	≤3000	2625	HCG	1	1	1	继发不孕	0.11	≤24	22.2	女方因素	2	8.26	658	0.42	1	18.78	5.01	83.77	4	3	5.9	B	IVF	0	0	0	0	0	0	0	是		无可移植胚胎
2191	0	C00017982	丁彦玲	≥35	51	4	刺激方案	1	225	≤10天	5	≤3000	1125	HCG	4	1	1	继发不孕	0.24	＞24	25.3	混合因素	1	14.26	280	3.51		17.26	5.02	14	4	2	11.8	B		0	0	0	0	0	0	0	是		未取卵
1699	1	2016100143	李如香	≥35	41	2	刺激方案	1	450	≤10天	9	＞3000	4050	HCG	8	1	1	继发不孕	0.19	＞24	24.8	女方因素	2	0.99	755	3.24	2	10.57	5.03	83.77	4	4	9	B	IVF	1	0	1	0	0	0	0	否	否	全胚冷冻
2162	0	2016040171	李如香	≥35	40	1	拮抗剂方案	2	182.143	≤10天	7	≤3000	1275	HCG	8	1	1	继发不孕	0.61	＞24	24.8	混合因素	1	18.64	339	0.61		10.57	5.03	44.98	4	4	8	A-B		0	0	0	0	0	0	0	是		未取卵
905	0	C00010999	刘衍兰	≥35	37	2	拮抗剂方案	2	202.5	≤10天	10	≤3000	2025	双扳机	3	0	0	原发不孕	0.89	≤24	22.4	女方因素	5	0.75	1209	1.23	5	16.72	5.04	11	4	6	11.2	A	IVF	1	0	0	0	0	0	0	是		无可移植胚胎
1211	0	C00012745	刘衍兰	≥35	38	3	刺激方案	1	195	≤10天	10	≤3000	1950	HCG	4	0	0	原发不孕	0.88	≤24	22.4	女方因素	4	1.69	1178	0.54	4	16.72	5.04	11	4	6			IVF	3	0	0	0	0	0	0	是		无可移植胚胎
1746	0	2016070058	亓建玲	≥35	45	1	刺激方案	1	262.5	≤10天	4	≤3000	1050	HCG	1	2	1	继发不孕	0.450	≤24	23.8	女方因素	2	21.48	636	0.66	0	10.73	5.05	42	4	2	6.8	B		0	0	0	0	0	0	0	是		未取到卵
2029	0	2017080083	熊巩莹	＜35	27	3	刺激方案	1	150	＞10天	11	≤3000	1650	HCG	4	1	0	继发不孕	0.39	＞24	27.1	女方因素	1	34.98	718	1.17	0	14.28	5.05	65	3	5	5.1	B		0	0	0	0	0	0	0	是		未取到卵
782	0	C00003804	戚相华	≥35	43	1	拮抗剂方案	2	268.75	＞10天	12	＞3000	3225	双扳机	1	2	2	继发不孕	0.5	＞24	25.4	女方因素	5	2.86	1736	0.54	4	15.05	5.07	46.81	4	5	11.3	A-B	IVF	2	0	2	0	0	0	0	否	否	全胚冷冻
1540	0	C00007398	戚相华	≥35	44	2	拮抗剂方案	2	225	≤10天	4	≤3000	900	双扳机	1	2	2	继发不孕	0.548	＞24	25.4	混合因素	3	7.73	1175	0.25	3	15.05	5.07	77	4	5	9	A	ICSI	0	0	0	0	0	0	0	是		无可移植胚胎
1743	0	C00008797	陈子凤	≥35	45	2	刺激方案	1	193.75	＞10天	12	≤3000	2325	HCG	2	3	1	继发不孕	0.51	＞24	28.3	混合因素	2	18.12	643	1.19	2	18.62	5.07	49	4	4	6.2	B-C	ICSI	2	0	0	0	0	0	0	是		无可移植胚胎
2039	1	C00010616	戚相华	≥35	44	4	降调节方案	3	312.5	≤10天	6	≤3000	1875	HCG	1	2	2	继发不孕	0.67	＞24	25.4	女方因素	1	3.5	674	0.42	2	15.05	5.07	46	4	5	9.6	A-B	IVF	1	0	1	0	0	0	0	否	否	全胚冷冻
2084	1	C00007161	陈子凤	≥35	45	1	拮抗剂方案	2	375	≤10天	8	≤3000	3000	HCG	2	3	1	继发不孕	0.38	＞24	28.3	混合因素	1	13.42	508	0.82	3	18.62	5.07	49	4	5	7.2	A	ICSI	3	0	2	1	2	2	0	否	是	移植	未妊娠
2122	1	C00009169	戚相华	≥35	44	3	刺激方案	1	300	≤10天	7	≤3000	2100	HCG	1	2	2	继发不孕	0.36	＞24	25.4	混合因素	1	10.64	430	0.16	2	15.05	5.07	26	4	5	7.5	A	ICSI	2	0	1	0	1	1	0	否	是	移植	未妊娠
2046	1	2017060158	宋红丽	≥35	46	3	拮抗剂方案	2	300	≤10天	9	≤3000	2700	HCG	2	3	1	继发不孕	0.80	≤24	20.8	混合因素	1	1.83	657	0.57	0	18.5	5.08	73.4	4	3	5.8	A		0	0	0	0	0	0	0	是		未取到卵
862	1	C00010529	廖淑芳	≥35	43	2	刺激方案	1	431.25	＞10天	12	＞3000	5175	HCG	3	1	1	继发不孕	0.26	＞24	30.4	女方因素	5	3.72	1251	0.95	3	6.54	5.09	47	4	8	0.65	B	IVF	2	0	1	1	0	0	0	否	否	全胚冷冻
1236	1	C00011956	廖淑芳	≥35	44	3	刺激方案	1	300	＞10天	11	＞3000	3300	HCG	3	1	1	继发不孕	0.29	＞24	30.4	女方因素	3	6.88	946	0.8	2	6.54	5.09	47	4	5	0.53	B-C	IVF	0	0	1	0	0	0	0	否	否	全胚冷冻
1789	0	2016040238	王增苓	≥35	43	1	刺激方案	1	160.714	≤10天	7	≤3000	1125	HCG	12	2	1	继发不孕	0.56	＞24	29.3	女方因素	2	2.29	560	0.3	1	10.38	5.09	55.42	4	7	8.4	A	IVF	0	0	0	0	0	0	0	是		未受精
1145	1	2017020131	张晓云	≥35	42	1	刺激方案	1	370.588	＞10天	17	＞3000	6300	HCG	3	2	1	继发不孕	0.85	＞24	24.4	女方因素	4	5.28	1297	0.79	2	14.91	5.1	53.77	4	3	7.1	A	IVF	0	0	0	0	0	0	0	是		未受精
2117	0	C00012724	冯艳惠	≥35	44	2	拮抗剂方案	2	150	≤10天	6	≤3000	900	HCG	3	5	1	继发不孕	0.117	＞24	24.8	混合因素	1	22.69	443	0.85	1	16.28	5.12	46	4	3	7.4	A		0	0	0	0	0	0	0	是		未行授精
810	1	C00004759	王传香	≥35	45	2	拮抗剂方案	2	300	＞10天	14	＞3000	4200	双扳机	6	2	1	继发不孕	1.02	≤24	24	女方因素	5	3.5	1561	0.66	5	10.7	5.13	66	4	9	9	A	IVF	2	0	0	0	0	0	0	是		无可移植胚胎
819	0	2017080207	王传香	≥35	44	1	刺激方案	1	276.923	＞10天	13	＞3000	3600	HCG	6	2	1	继发不孕	0.32	≤24	24	女方因素	5	0.77	1503	0.34	7	10.7	5.13	66	4	9	10	A	IVF	4	0	1	0	1	1	0	否	是	移植	未妊娠
1205	1	C00018942	杨青艳	＜35	32	1	拮抗剂方案	2	300	≤10天	9	≤3000	2700	HCG	3	0	0	继发不孕	1.05	＞24	29.3	女方因素	4	2.65	1021.29	1.26	4	17.63	5.13	39.21	3	7	14.4	B	IVF	3	0	3	1	2	2	0	否	是	移植	已妊娠	临床妊娠	宫内妊娠	单胎宫内妊娠
1408	1	C00009361	闫静	≥35	43	1	刺激方案	1	450	＞10天	11	＞3000	4950	HCG	10	3	1	继发不孕	0.42	＞24	31.7	混合因素	3	14.22	869	1.96	0	4.64	5.14	67	4	6	8	B		0	0	0	0	0	0	0	是		未取到卵
1148	0	2016080168	张伟丽	≥35	39	1	拮抗剂方案	2	247.5	≤10天	10	≤3000	2475	HCG	3	1	1	继发不孕	0.82	≤24	24	混合因素	4	6.69	1275	1	4	7.24	5.15	42.29	4	6	14.2	B	ICSI	3	0	3	1	0	0	0	否	否	全胚冷冻
2107	1	C00011408	张娟	≥35	43	1	刺激方案	1	300	＞10天	12	＞3000	3600	HCG	1	0	0	原发不孕	0.23	＞24	26.3	女方因素	1	11.26	455	0.34	1	14.84	5.18	24	4	2	0.53	B	IVF	0	0	0	0	0	0	0	是		未受精
704	1	2016110210	刘秀芳	≥35	44	1	降调节方案	3	443.75	≤10天	8	＞3000	3550	HCG	1	3	1	继发不孕	0.48	≤24	22	女方因素	5	5.97	1669	0.78	7	9.01	5.19	45	4	8	19.1	A-B	IVF	4	0	2	0	0	0	0	否	否	全胚冷冻
1250	1	2016090208	邢玉风	≥35	47	1	刺激方案	1	300	＞10天	11	＞3000	3300	HCG	3	6	2	继发不孕	0.58	＞24	29.3	女方因素	3	3.67	910	0.8	3	5.24	5.19	31	4	3	8.4	A	IVF	2	0	2	0	2	2	0	否	是	移植	未妊娠
1396	1	2016080199	毕春梅	≥35	39	1	刺激方案	1	375	≤10天	10	＞3000	3750	HCG	10	0	0	原发不孕	0.940	＞24	26.2	女方因素	3	3.34	891.83	0.93	4	14.08	5.19	76.43	4	7	9.7	B	IVF	3	0	3	1	2	2	0	否	是	移植	已妊娠	临床妊娠	宫内妊娠	双胎宫内妊娠
1892	0	2016050193	白秀兰	≥35	39	2	刺激方案	1	150	≤10天	7	≤3000	1050	HCG	8	2	1	继发不孕	0.56	≤24	18.7	混合因素	2	18.41	199	2.02		9.01	5.19	45	4	4	10.4	B		0	0	0	0	0	0	0	是		未取卵
884	0	2017100184	宋焕焕	＜35	31	4	降调节方案	3	197.727	＞10天	11	≤3000	2175	HCG	1	3	0	继发不孕	1.09	≤24	20.7	女方因素	5	1.05	1108	0.64	4	9.76	5.22	80.74	3	5	16.2	A	IVF	4	0	4	3	0	0	0	否	否	全胚冷冻
1933	0	2016060141	宋焕焕	＜35	30	3	拮抗剂方案	2	225	≤10天	5	≤3000	1125	HCG	1	2	0	继发不孕	0.44	≤24	20.7	女方因素	2	17.55	435	0.47	2	9.76	5.22	80.74	3	5	14	A	IVF	2	0	2	1	2	2	0	否	是	移植	已妊娠	临床妊娠	宫内妊娠	单胚胎停
1636	1	C00016425	吕桂霞	≥35	39	2	降调节方案	3	328.846	＞10天	13	＞3000	4275	HCG	4	3	1	继发不孕	0.28	≤24	21.3	女方因素	2	1.1	896	0.23	3	14.87	5.25	23	4	7	9.1	B	IVF	1	0	1	0	1	1	0	否	是	移植	未妊娠
1585	1	2017040155	侯东红	≥35	44	2	拮抗剂方案	2	400	≤10天	5	≤3000	2000	HCG	1	4	1	继发不孕	0.28	＞24	24.2	混合因素	3	12.29	1038	0.64	3	7.43	5.26	38	4	5	8.1	A	ICSI	2	0	2	2	0	0	0	否	否	全胚冷冻
1973	1	2017030303	侯东红	≥35	44	1	拮抗剂方案	2	325	≤10天	8	≤3000	2600	双扳机	1	4	1	继发不孕	0.78	＞24	24.2	混合因素	2	22.81	444.65	0.35		7.43	5.26	39.5	4	5	8.8	A-B		0	0	0	0	0	0	0	是		未取卵
2030	0	2017110044	刘春	≥35	45	1	降调节方案	3	250	≤10天	10	≤3000	2500	HCG	3	3	1	继发不孕	0.23	≤24	23.6	不明原因	1	6.78	716	1.22	1	17.41	5.26	42	4	3	7		ICSI	1	0	1	0	0	0	0	否	否	全胚冷冻
2097	1	2017050126	侯东红	≥35	44	3	降调节方案	3	325	≤10天	5	≤3000	1625	HCG	1	4	1	继发不孕	0.55	＞24	24.2	混合因素	1	10.566	473	0.62	1	7.43	5.26	39.5	4	5	8.2	A-B	ICSI	0	0	0	0	0	0	0	是		未受精
259	1	2017020046	刘正香	≥35	44	2	刺激方案	1	307.5	≤10天	10	＞3000	3075	HCG	3	5	0	继发不孕	0.39	＞24	26.6	女方因素	7	0.99	2609	0.95	6	7.78	5.28	57.62	4	10	9.3	A	IVF	2	0	1	0	1	1	0	否	是	移植	未妊娠
960	1	C00018429	白红霞	≥35	35	1	刺激方案	1	310.714	＞10天	14	＞3000	4350	HCG	9	0	0	原发不孕	1.06	≤24	20.4	女方因素	4	14.89	489.95	0.95	2	9.88	5.28	15.21	4	7	5.3	A-B	IVF	1	0	0	0	0	0	0	是		无可移植胚胎
961	1	2017110036	佟贞秀	≥35	42	1	拮抗剂方案	2	337.5	≤10天	10	＞3000	3375	HCG	2	2	1	继发不孕	0.18	≤24	20.1	混合因素	4	3.08	434	3.13	0	15.63	5.28	89.45	4	3	8.4	A-B		0	0	0	0	0	0	0	是		未取到卵
1401	1	2017090242	刘正香	≥35	44	3	刺激方案	1	375	≤10天	9	＞3000	3375	HCG	3	5	0	继发不孕	0.68	＞24	26.6	女方因素	3	15.17	883	0.62	4	7.78	5.28	57.62	4	10	6	A	IVF	1	0	1	0	0	0	0	否	否	全胚冷冻
1895	1	2018060029	刘正香	≥35	45	4	刺激方案	1	337.5	≤10天	8	≤3000	2700	HCG	3	5	0	继发不孕	0.51	＞24	26.6	不明原因	2	11.62	455	0.71	2	7.78	5.28	57.62	4	5	5.3	B	IVF	1	0	1	0	0	0	0	否	否	全胚冷冻
2184	0	2016030260	李钢	＜35	33	1	刺激方案	1	150	≤10天	6	≤3000	900	HCG		0	0	原发不孕	0.86	≤24	22.7	女方因素	1	14.52	295	2.12		13.45	5.32	56.34	3	4	6.2	A		0	0	0	0	0	0	0	是		未取卵
2267	1	2018050248	徐爱春	≥35	42	1	刺激方案	1	382.5	≤10天	10	＞3000	3825	HCG	5	3	1	继发不孕	0.20	≤24	21.3	混合因素	1	5.97	322	0.83	0	20.87	5.32	99.09	4	2				0	0	0	0	0	0	0	是		未取到卵
1709	0	C00012868	胡静	≥35	39	3	拮抗剂方案	2	150	≤10天	8	≤3000	1200	HCG	1	2	1	继发不孕	0.19	≤24	21.3	混合因素	2	4.4	735	0.5	2	16.02	5.33	20	4	5	10.3	A	ICSI	2	0	1	0	1	2	0	否	是	移植	未妊娠
256	1	C00009425	阮洪荣	≥35	42	2	刺激方案	1	450	＞10天	11	＞3000	4950	HCG	2	0	0	原发不孕	1.09	≤24	22	女方因素	7	13.37	1676	2.2	1	14.22	5.34	32	4	6	0.62	A-B	IVF	0	0	0	0	0	0	0	是		未受精
2085	0	C00017479	陈相风	≥35	42	1	刺激方案	1	243.75	≤10天	8	≤3000	1950	HCG	2	0	0	原发不孕	0.3	≤24	20.3	混合因素	1	20.7	507	1.25	2	8.95	5.34	66	4	4	7.9	B	ICSI	0	0	0	0	0	0	0	是		无可移植胚胎
2183	1	2016110264	郭海英	≥35	39	2	刺激方案	1	300	≤10天	6	≤3000	1800	HCG	2	3	1	继发不孕	0.43	＞24	24.9	女方因素	1	6.86	299	0.38	1	20.74	5.34	74	4	2	8.2	A	IVF	1	0	0	0	0	0	0	是		无可移植胚胎
2187	1	2016100068	郭海英	≥35	39	1	刺激方案	1	313.636	＞10天	11	＞3000	3450	HCG	2	3	1	继发不孕	0.43	＞24	24.9	女方因素	1	4.03	288	1.28	0	20.74	5.34	74	4	2	8.8	B		0	0	0	0	0	0	0	是		未取到卵
1830	0	2017040172	付正玲	≥35	43	1	拮抗剂方案	2	247.5	≤10天	10	≤3000	2475	HCG	3	3	2	继发不孕	0.93	＞24	27.7	女方因素	2	10.39	490	0.41	1	12.54	5.35	77.07	4	3	11.8	A	IVF	1	0	1	0	1	1	0	否	是	移植	未妊娠
1328	0	2018040016	李萍	≥35	45	2	拮抗剂方案	2	125	＞10天	24	≤3000	3000	HCG	1	2	1	继发不孕	0.73	≤24	23.4	混合因素	3	0.47	663	0.45	5	4.39	5.36	47.71	4	8	11.3	A	ICSI	1	0	2	0	0	0	0	否	否	全胚冷冻
1679	1	C00010515	郝照华	≥35	42	1	拮抗剂方案	2	300	≤10天	9	≤3000	2700	HCG	3	0	0	原发不孕	0.81	≤24	21.5	混合因素	2	5.22	801	0.32	2	11.28	5.36	57	4	4	13.2	A-B	ICSI	2	0	1	0	0	0	0	否	否	全胚冷冻
1769	0	2017110278	白永芳	≥35	47	4	刺激方案	1	150	≤10天	8	≤3000	1200	HCG	3	4	1	继发不孕	0.15	＞24	24.2	不明原因	2	8.71	601	2.48	1	18.67	5.38	36	4	4	6.6	B	IVF	1	0	1	0	0	0	0	否	否	全胚冷冻
615	1	2017090133	王国娟	＜35	29	2	刺激方案	1	375	≤10天	5	≤3000	1875	HCG	5	1	0	继发不孕	1.09	≤24	23.7	女方因素	6	12.33	1328	2.68	5	9.15	5.39	65.76	3	8	7.8	A	IVF	4	0	0	0	0	0	0	是		无可移植胚胎
1501	0	C00018822	薛岸欣	≥35	46	3	刺激方案	1	150	≤10天	8	≤3000	1200	HCG	2	1	0	继发不孕	0.63	≤24	21.5	女方因素	3	3.81	955	0.94	3	17.05	5.4	97.66	4	5	8.6	B	IVF	3	0	3	2	0	0	0	否	否	全胚冷冻
1759	1	C00004976	王玉萍	＜35	31	4	拮抗剂方案	2	337.5	＞10天	12	＞3000	4050	HCG	5	0	0	原发不孕	0.757	≤24	21.6	男方因素	2	22.2	611	0.84	3	4.21	5.4	66.06	3	6	10.7	A-B	ICSI	1	0	1	0	1	1	0	否	是	移植	未妊娠
419	0	C00012995	宋炜彤	≥35	45	3	刺激方案	1	248.077	＞10天	13	＞3000	3225	HCG	3	3	1	继发不孕	0.79	＞24	25.6	女方因素	7	4.69	1082	1.68	5	17.09	5.42	41	4	6	8.5	A	IVF	1	0	0	0	0	0	0	是		无可移植胚胎
1238	1	C00012305	高世芹	≥35	40	3	刺激方案	1	300	≤10天	7	≤3000	2100	HCG	4	1	0	继发不孕	0.32	≤24	21	混合因素	3	6.92	942	1.03	3	10.09	5.42	41	4	6	0.53		ICSI	2	0	2	0	0	0	0	否	否	全胚冷冻
1419	1	2016090021	艾春丽	≥35	39	1	刺激方案	1	300	＞10天	11	＞3000	3300	HCG	2	3	2	继发不孕	0.89	＞24	24.4	女方因素	3	2.16	829	1.27	4	17.09	5.42	41	4	4	7.7	A-B	IVF	1	0	1	0	0	0	0	否	否	全胚冷冻
1454	0	C00016489	宋炜彤	≥35	46	6	刺激方案	1	150	≤10天	7	≤3000	1050	HCG	3	3	1	继发不孕	0.74	＞24	25.6	男方因素	3	11.27	895	1.07	3	17.09	5.42	41	4	6	6.5	C	ICSI	2	0	2	0	0	0	0	否	否	全胚冷冻
1457	0	C00015492	宋炜彤	≥35	45	5	刺激方案	1	150	≤10天	9	≤3000	1350	HCG	3	3	1	继发不孕	0.22	＞24	25.6	男方因素	3	10.07	887	0.9	4	17.09	5.42	41	4	6	6.1	C	ICSI	1	0	2	0	0	0	0	否	否	全胚冷冻
1488	1	2017100185	郑荣景	≥35	38	2	刺激方案	1	300	≤10天	10	≤3000	3000	HCG	1	3	1	继发不孕	0.940	＞24	31.3	女方因素	3	2.08	819	0.76	4	11.09	5.42	41	4	7	6.2	B	IVF	3	0	2	0	0	0	0	否	否	全胚冷冻
1497	1	C00011351	高世芹	≥35	40	2	刺激方案	1	300	≤10天	10	≤3000	3000	HCG	4	1	0	继发不孕	0.56	≤24	21	混合因素	3	9.45	961	1.23	4	10.09	5.42	41	4	6	0.5	B	ICSI	2	0	1	0	0	0	0	否	否	全胚冷冻
1599	0	C00018607	宋炜彤	≥35	46	7	刺激方案	1	225	≤10天	8	≤3000	1800	HCG	3	3	1	继发不孕	0.96	＞24	25.6	男方因素	3	5.87	912	0.52	3	17.09	5.42	41	4	6	7.1	B-C	ICSI	1	0	0	0	0	0	0	是		无可移植胚胎
1941	1	C00012035	宋炜彤	≥35	45	1	刺激方案	1	427.5	≤10天	10	＞3000	4275	HCG	3	3	1	继发不孕	1.05	＞24	25.6	女方因素	2	3.68	412	0.15	1	17.09	5.42	41	4	6	4.7	B-C	IVF	1	0	0	0	0	0	0	是		无可移植胚胎
1424	0	C00012735	王秋红	≥35	41	2	拮抗剂方案	2	285	≤10天	10	≤3000	2850	HCG	1	2	0	继发不孕	0.18	≤24	21.4	女方因素	3	1.36	971	1.18	3	17.13	5.46	15	4	5	10.1	A	IVF	3	0	0	0	0	0	0	是		无可移植胚胎
2099	0	2016050175	王静	≥35	43	1	降调节方案	3	200	＞10天	12	≤3000	2400	HCG	4	1	0	继发不孕	0.28	＞24	24.2	女方因素	1	7.07	467	0.83	1	21.65	5.46	80.74	4	3	9.7	A	IVF	0	0	0	0	0	0	0	是		未受精
759	0	2017120278	李秀娣	≥35	43	3	拮抗剂方案	2	250	≤10天	4	≤3000	1000	HCG	2	4	1	继发不孕	0.6	＞24	24.8	混合因素	5	2.85	1343	0.54	5	16.45	5.49	89.48	4	5	11.3	A	ICSI	4	0	2	1	0	0	0	否	否	全胚冷冻
1223	0	2016030172	卢伟	≥35	45	2	降调节方案	3	285	≤10天	10	≤3000	2850	HCG	15	2	1	继发不孕	0.22	≤24	22	女方因素	3	4.84	982	1.17	3	12.89	5.49	46.98	4	4	8.1	B-C	IVF	1	0	1	0	1	1	0	否	是	移植	未妊娠
1790	0	2017110228	李秀娣	≥35	42	2	刺激方案	1	245.455	＞10天	11	≤3000	2700	HCG	2	4	1	继发不孕	0.6	＞24	24.8	混合因素	2	4.73	557	2.35	0	16.45	5.49	89.48	4	5	12.5	A		0	0	0	0	0	0	0	是		未取到卵
2225	0	2017090007	李秀娣	≥35	42	1	拮抗剂方案	2	150	≤10天	7	≤3000	1050	HCG	2	4	1	继发不孕	0.6	＞24	24.8	混合因素	1	0.41	180	1.58	1	16.45	5.49	89.48	4	4	10.6	B	ICSI	1	0	1	0	1	1	0	否	是	移植	未妊娠
1898	1	2016060152	赵恒荣	≥35	44	1	刺激方案	1	400	≤10天	6	≤3000	2400	HCG	1	1	1	继发不孕	0.41	≤24	22.4	混合因素	2	12.02	860	1.16	1	16.56	5.5	70.37	4	5	5.8	B	ICSI	0	0	0	0	0	0	0	是		未受精
2189	0	2017100100	何霞	≥35	38	2	刺激方案	1	150	≤10天	6	≤3000	900	双扳机	9	0	0	原发不孕	0.61	＞24	27	女方因素	1	5.37	285	0.33	0	12.56	5.5	40.37	4	4				0	0	0	0	0	0	0	是		未取到卵
2203	1	2016070029	梁夫芝	≥35	44	1	刺激方案	1	450	≤10天	8	＞3000	3600	HCG	3	4	1	继发不孕	0.56	＞24	26.7	女方因素	1	1.5	253	0.94	1	10.15	5.5	29.09	4	3	10	A-B	IVF	1	0	0	0	0	0	0	是		无可移植胚胎
1271	1	2016040141	上官厚英	≥35	44	4	刺激方案	1	300	≤10天	8	≤3000	2400	HCG	3	3	1	继发不孕	0.32	＞24	25.8	不明原因	3	2.1	869	0.68	1	12.45	5.51	69.73	4	6	12.2	A-B	IVF	1	0	0	0	0	0	0	是		无可移植胚胎
946	0	2015110146	秦树红	≥35	47	2	刺激方案	1	180	≤10天	10	≤3000	1800	HCG	15	0	0	原发不孕	0.806	≤24	21.3	女方因素	4	5.27	735	0.65	2	10.69	5.54	13	4	3	13.5	A	IVF	2	0	1	1	0	0	0	否	否	全胚冷冻
1410	1	C00012593	周静	≥35	48	4	拮抗剂方案	2	290.625	≤10天	8	≤3000	2325	双扳机	8	3	0	继发不孕	0.83	≤24	19.5	女方因素	3	5.3	860	0.68	2	9.73	5.54	37	4	7	8.6	B	IVF	0	0	0	0	0	0	0	是		无可移植胚胎
1943	0	2017100063	师吉艳	≥35	42	1	刺激方案	1	150	≤10天	8	≤3000	1200	HCG	1	4	1	继发不孕	0.85	≤24	21.6	女方因素	2	7.74	393	0.68	1	12.39	5.55	28	4	3	5.3	B	IVF	1	0	1	0	0	0	0	否	否	全胚冷冻
1286	1	2016050086	李凤娟	≥35	43	3	刺激方案	1	400	≤10天	6	≤3000	2400	HCG	3	3	1	继发不孕	1.0	≤24	22.2	混合因素	3	1.19	815	2.05	2	16.15	5.56	24	4	6	6.5	A	ICSI	1	0	1	0	0	0	0	否	否	全胚冷冻
1772	1	2016040233	李凤娟	≥35	43	2	降调节方案	3	425	≤10天	7	≤3000	2975	HCG	3	3	1	继发不孕	1.0	≤24	22.2	混合因素	2	11.81	595	0.71	0	16.15	5.56	24	4	6	9.7	A		0	0	0	0	0	0	0	是		未取到卵
1805	1	2016030301	李凤娟	≥35	43	1	降调节方案	3	375	≤10天	7	≤3000	2625	HCG	3	3	1	继发不孕	0.56	≤24	22.2	混合因素	2	10.91	533	1.16	0	16.15	5.56	24	4	6	8.5	A		0	0	0	0	0	0	0	是		未取到卵
1871	1	2017040088	王秋菊	≥35	37	1	刺激方案	1	382.5	≤10天	10	＞3000	3825	HCG	9	0	0	原发不孕	1.13	＞24	25.2	混合因素	2	25.84	349	1.19	1	7.91	5.56	40.37	4	6	7.7	A	ICSI	1	0	1	0	0	0	0	否	否	全胚冷冻
1918	1	2017110214	李芳	＜35	34	1	降调节方案	3	375	＞10天	13	＞3000	4875	HCG	3	1	0	继发不孕	1.07	≤24	18.3	男方因素	2	8.62	486	1.02	3	6.36	5.56	85.14	3	8	11.4	A	ICSI	3	0	2	0	2	2	0	否	是	移植	已妊娠	临床妊娠	宫内妊娠	单胚胎停
1532	0	C00003711	付美芳	≥35	40	1	降调节方案	3	160.714	≤10天	7	≤3000	1125	HCG	2	1	0	继发不孕	0.57	≤24	23.7	女方因素	3	5.57	1233	0.95	2	9.7	5.57	34.33	4	5	10.7	A-B	IVF	2	0	2	1	1	1	0	否	是	移植	未妊娠
1760	1	C00019099	魏媛媛	≥35	36	2	拮抗剂方案	2	300	≤10天	8	≤3000	2400	HCG	1	1	0	继发不孕	0.890	≤24	22.2	女方因素	2	2.13	610.64	0.57	3	9.02	5.58	58	4	7	9	A	IVF	1	0	1	0	1	1	0	否	是	移植	未妊娠
1073	1	C00013061	崔玉芹	≥35	41	1	拮抗剂方案	2	291.667	≤10天	9	≤3000	2625	HCG	3	0	0	原发不孕	0.66	≤24	22.6	女方因素	4	2.67	1568	0.26	3	11.15	5.59	25	4	7	11.9	A	IVF	2	0	2	2	2	2	0	否	是	移植	已妊娠	临床妊娠	宫外妊娠	异位妊娠
518	0	C00010993	李婷	≥35	42	1	降调节方案	3	225	≤10天	9	≤3000	2025	HCG	1	3	1	继发不孕	1.0	≤24	24	女方因素	6	4.65	2267	1.25	4	17.08	5.6	26	4	7	0.64	B	IVF	2	0	0	0	0	0	0	是		无可移植胚胎
1139	1	C00012619	李婷	≥35	42	3	刺激方案	1	300	≤10天	9	≤3000	2700	HCG	1	3	1	继发不孕	0.18	≤24	24	女方因素	4	3.43	1313	0.89	2	17.08	5.6	26	4	5	0.88	A-B	IVF	1	0	1	0	1	1	0	否	是	移植	未妊娠
1727	0	C00011675	李婷	≥35	42	2	刺激方案	1	256.25	＞10天	12	＞3000	3075	HCG	1	3	1	继发不孕	1.17	≤24	24	女方因素	2	12.38	688	1.59	2	17.08	5.6	26	4	5	0.86	B	IVF	0	0	0	0	0	0	0	是		无可移植胚胎
1393	1	C00012356	高琳琳	≥35	37	5	刺激方案	1	300	＞10天	11	＞3000	3300	HCG	5	0	0	原发不孕	0.21	≤24	23.2	女方因素	3	13.52	903	1.19	2	16.59	5.61	20	4	4	0.47	B	IVF	1	0	0	0	0	0	0	是		无可移植胚胎
1612	1	C00014735	高琳琳	≥35	37	6	刺激方案	1	450	＞10天	12	＞3000	5400	HCG	5	0	0	原发不孕	0.41	≤24	23.2	女方因素	2	27.4	979	1.77	1	16.59	5.61	20	4	5	0.49	B	IVF	1	0	1	1	0	0	0	否	否	全胚冷冻
2072	1	C00015833	高琳琳	≥35	38	7	刺激方案	1	450	≤10天	8	＞3000	3600	HCG	5	0	0	原发不孕	0.64	≤24	23.2	女方因素	1	24.45	559	0.97	1	16.59	5.61	20	4	2	0.52	A-B	IVF	0	0	0	0	0	0	0	是		未受精
1745	0	2016080205	高红	≥35	42	1	刺激方案	1	225	≤10天	9	≤3000	2025	HCG	10	1	1	继发不孕	0.320	＞24	28.2	女方因素	2	15.5	636	0.28	1	8.94	5.63	56.43	4	5	4.5	B	IVF	0	0	0	0	0	0	0	是		无可移植胚胎
1819	1	2018030188	高红	≥35	43	5	刺激方案	1	431.25	≤10天	8	＞3000	3450	HCG	10	1	1	继发不孕	0.45	＞24	28.2	男方因素	2	1.64	511	0.63	3	8.94	5.63	86.43	4	5	8.4	B	ICSI	2	0	0	0	0	0	0	是		无可移植胚胎
2261	0	2017090244	高红	≥35	43	1	刺激方案	1	225	≤10天	7	≤3000	1575	HCG	10	1	1	继发不孕	0.22	＞24	28.2	女方因素	1	7.94	329	0.05	0	8.94	5.63	56.43	4	4				0	0	0	0	0	0	0	是		未取到卵
723	0	2016020132	陶园	＜35	33	1	降调节方案	3	275	＞10天	11	＞3000	3025	HCG	2	1	0	继发不孕	1.12	≤24	19.2	女方因素	5	4.26	1557	2.01	4	7.85	5.67	55.42	3	7	10.7	B	IVF	3	0	2	1	0	0	0	否	否	全胚冷冻
1466	1	2016030119	张延华	≥35	47	3	刺激方案	1	350	≤10天	7	≤3000	2450	HCG	2	3	0	继发不孕	0.34	≤24	22.8	混合因素	3	9.3	955	0.99	5	16.34	5.67	40.88	4	5	6.8	A	ICSI	3	0	3	2	0	0	0	否	否	全胚冷冻
1601	1	2017070026	杨晓梅	≥35	35	1	降调节方案	3	309.615	＞10天	13	＞3000	4025	HCG	4	0	0	原发不孕	0.96	≤24	19.1	男方因素	3	1.3	910	0.44	1	10.34	5.67	40.88	4	6	9	A	ICSI	0	0	0	0	0	0	0	是		无可移植胚胎
1860	0	2016080098	燕国英	≥35	44	1	刺激方案	1	225	≤10天	8	≤3000	1800	HCG	1	4	1	继发不孕	0.19	≤24	22.5	女方因素	2	3.16	378	2.04	1	16.67	5.68	43	4	4	7.2	A	IVF	1	0	1	1	0	0	0	否	否	全胚冷冻
1854	1	2018060232	陆田田	≥35	36	4	降调节方案	3	375	≤10天	5	≤3000	1875	HCG	2	1	0	继发不孕	1.05	＞24	28.6	混合因素	2	4.92	414	0.63	0	8.76	5.7	86.43	4	6	10.2	A		0	0	0	0	0	0	0	是		未取到卵
577	1	2016060031	刘红	≥35	46	3	刺激方案	1	328.125	≤10天	8	≤3000	2625	HCG	2	4	1	继发不孕	0.12	＞24	26	女方因素	6	0.72	1650	0.95	7	12.45	5.71	36.43	4	7	8.5	B	IVF	5	0	2	0	0	0	0	否	否	全胚冷冻
675	0	2016020019	王春莲	≥35	45	1	降调节方案	3	232.5	≤10天	10	≤3000	2325	HCG	1	4	1	继发不孕	0.62	＞24	24.9	女方因素	5	8.32	1863	0.81	5	11.54	5.71	53.77	4	7	11	A	IVF	2	0	2	2	2	2	0	否	是	移植	未妊娠
1024	1	2016020156	刘红	≥35	46	1	刺激方案	1	300	≤10天	9	≤3000	2700	HCG	2	4	1	继发不孕	0.33	＞24	26	女方因素	4	3.24	1178	1.65	2	14.56	5.71	78.43	4	4	8.9	B	IVF	1	0	1	1	0	0	0	否	否	全胚冷冻
1067	1	2016090243	刘红	≥35	47	4	刺激方案	1	300	≤10天	8	≤3000	2400	HCG	2	4	1	继发不孕	0.75	＞24	26	混合因素	4	8.99	1593	1.39	4	14.34	5.71	78.43	4	5	6	B	ICSI	4	0	2	1	0	0	0	否	否	全胚冷冻
1512	1	2016050078	刘红	≥35	46	2	刺激方案	1	333.333	≤10天	9	≤3000	3000	HCG	2	4	1	继发不孕	1.01	＞24	26	女方因素	3	0.88	883.58	0.77	3	12.45	5.71	36.43	4	6	8	B-C	IVF	2	0	0	0	0	0	0	是		无可移植胚胎
1700	0	2016010148	颜世英	≥35	45	4	刺激方案	1	225	≤10天	7	≤3000	1575	HCG	2	1	1	继发不孕	0.87	≤24	22.5	女方因素	2	15.87	753	0.55	2	14.56	5.71	54	4	3	7.9	A-B	IVF	1	0	1	0	0	0	0	否	否	全胚冷冻
1191	1	C00010565	任淑青	≥35	46	1	拮抗剂方案	2	309.375	≤10天	8	≤3000	2475	双扳机	1	5	1	继发不孕	0.81	≤24	22.6	女方因素	4	1.12	1093	1.64	3	13.18	5.72	86	4	6	6.2		IVF	2	0	1	0	1	1	0	否	是	移植	未妊娠
1471	1	C00011987	任淑青	≥35	47	2	拮抗剂方案	2	450	＞10天	13	＞3000	5850	HCG	1	5	1	继发不孕	0.57	≤24	22.6	女方因素	3	20.38	928	0.68	1	13.18	5.72	86	4	6	7.2	A	IVF	1	0	1	0	1	1	0	否	是	移植	未妊娠
1913	1	C00014154	任淑青	≥35	47	6	刺激方案	1	300	≤10天	6	≤3000	1800	HCG	1	5	1	继发不孕	0.45	≤24	22.6	女方因素	2	1.65	497	0.09	2	13.18	5.72	86	4	6	0.8	A	IVF	1	0	0	0	0	0	0	是		无可移植胚胎
1954	1	C00015378	任淑青	≥35	47	7	刺激方案	1	428.571	≤10天	7	≤3000	3000	HCG	1	5	1	继发不孕	0.12	≤24	22.6	女方因素	2	1.91	499.54	0.4	3	13.18	5.72	86	4	6	0.79	A-B	IVF	3	0	3	0	0	0	0	否	否	全胚冷冻
760	1	C00003310	赵兰英	≥35	49	1	刺激方案	1	300	≤10天	4	≤3000	1200	HCG	5	5	1	继发不孕	0.23	≤24	24	女方因素	5	10.84	1332	1.33	2	12.42	5.73	56.43	4	3	8.2	A-B	IVF	2	0	2	1	0	0	0	否	否	全胚冷冻
1994	1	C00004519	赵兰英	≥35	49	2	刺激方案	1	375	≤10天	8	≤3000	3000	HCG	5	5	1	继发不孕	0.75	≤24	24	女方因素	2	1.91	499.54	0.4	1	12.42	5.73	56.43	4	3	4	B	IVF	0	0	0	0	0	0	0	是		无可移植胚胎
711	1	C00016523	陈景花	≥35	39	1	拮抗剂方案	2	309.375	≤10天	8	≤3000	2475	HCG	2	2	1	继发不孕	0.48	≤24	20.6	女方因素	5	8.63	1631.13	0.28	4	5.76	5.74	83.57	4	6	13	A	IVF	2	0	2	1	2	2	0	否	是	移植	已妊娠	临床妊娠	宫内妊娠	单胎宫内妊娠
781	0	C00004992	李敬菊	≥35	42	4	刺激方案	1	251.786	＞10天	14	＞3000	3525	HCG	1	2	1	继发不孕	0.59	＞24	25.6	女方因素	5	10.18	1752	1.24	4	14.53	5.74	74.34	4	6	5.9	B	IVF	2	0	2	0	0	0	0	否	否	全胚冷冻
1194	0	C00012431	张蒙蒙	＜35	34	3	刺激方案	1	158.333	≤10天	9	≤3000	1425	双扳机	1	0	0	原发不孕	1.1	≤24	22.2	女方因素	4	9.21	1076	0.5	4	11.75	5.74	83	3	5			IVF	4	0	4	2	0	0	0	否	否	全胚冷冻
1859	0	2018010228	王凤娟	＜35	33	3	刺激方案	1	230.357	＞10天	14	＞3000	3225	HCG	4	1	0	继发不孕	1.18	＞24	25.2	女方因素	2	11.34	382	2.02	0	7.13	5.74	51.75	3	8	12.5	A		0	0	0	0	0	0	0	是		未取到卵
1905	1	C00003948	杨咏梅	≥35	43	3	刺激方案	1	327.273	＞10天	11	＞3000	3600	HCG	1	4	1	继发不孕	0.53	≤24	19.8	混合因素	2	15.34	511	2.08	2	18.97	5.74	84	4	3	4.9	B	ICSI	0	0	0	0	0	0	0	是		无可移植胚胎
858	1	C00014364	于淑华	≥35	42	1	刺激方案	1	316.667	≤10天	9	≤3000	2850	HCG	1	1	1	继发不孕	0.334	＞24	28	女方因素	5	3.2	1275	0.95	2	9.35	5.76	35.84	4	5	1.05	A-B	IVF	1	0	1	0	1	1	0	否	是	移植	未妊娠
1019	1	C00007082	王凤霞	＜35	34	1	刺激方案	1	346.875	≤10天	8	≤3000	2775	HCG	6	0	0	原发不孕	1.17	≤24	21	女方因素	4	18.25	1195	0.88	2	13.21	5.76	29	3	6	0.45	A-B	IVF	1	0	1	0	0	0	0	否	否	全胚冷冻
1842	1	C00019053	于淑华	≥35	43	2	刺激方案	1	450	＞10天	11	＞3000	4950	HCG	1	1	1	继发不孕	0.23	＞24	28	女方因素	2	8.39	456.45	0.76	1	9.35	5.76	35.84	4	5	7.2	A	IVF	0	0	0	0	0	0	0	是		无可移植胚胎
1229	1	C00013040	董雪	≥35	42	2	刺激方案	1	525	≤10天	4	≤3000	2100	双扳机	7	3	1	继发不孕	0.83	≤24	23.4	女方因素	3	28.34	970	0.83	1	14.47	5.78	65.37	4	6	0.6	B	IVF	0	0	0	0	0	0	0	是		无可移植胚胎
1551	0	2017060209	韩立香	≥35	45	1	刺激方案	1	177.083	＞10天	12	≤3000	2125	HCG	2	2	1	继发不孕	0.7	≤24	22	女方因素	3	7	1151	1.66	2	12.08	5.78	32	4	5	5.2	B	IVF	2	0	2	0	0	0	0	否	否	全胚冷冻
1730	1	2016080129	窦有霜	≥35	48	1	刺激方案	1	350	＞10天	15	＞3000	5250	HCG		0	0	原发不孕	0.76	＞24	24.4	混合因素	2	4.64	679	0.91	0	4.43	5.78	82	4	2	6	B		0	0	0	0	0	0	0	是		未取到卵
190	1	C00017361	曹秀杰	≥35	36	2	拮抗剂方案	2	316.071	＞10天	14	＞3000	4425	双扳机	2	4	2	原发不孕	0.87	≤24	16	女方因素	8	0.74	2123	1.06	0	6.11	5.79	34	4	6				0	0	0	0	0	0	0	是		未取到卵
1341	1	2018010072	张馨月	≥35	37	1	降调节方案	3	375	＞10天	12	＞3000	4500	HCG	3	1	0	继发不孕	0.54	＞24	25.3	女方因素	3	1.53	616	0.18	1	12.95	5.79	34.97	4	5	10.7	B	IVF	0	0	1	0	0	0	0	否	否	全胚冷冻
2031	1	2017020076	丁立梅	≥35	43	2	降调节方案	3	462.5	＞10天	14	＞3000	6475	HCG	1	4	1	继发不孕	0.06	≤24	20.9	女方因素	1	5.26	709	0.76	0	17.03	5.81	95.08	4	2	10.8	A		0	0	0	0	0	0	0	是		未取到卵
2096	1	2017030083	徐燕妮	≥35	42	1	降调节方案	3	380	＞10天	15	＞3000	5700	HCG	1	2	1	继发不孕	0.96	≤24	23.7	混合因素	1	3.13	482	0.25	1	12.82	5.81	73.4	4	3	7.5	A	ICSI	0	0	0	0	0	0	0	是		未受精
2246	1	2017040193	丁立梅	≥35	43	3	刺激方案	1	305.357	＞10天	14	＞3000	4275	HCG	1	4	1	继发不孕	0.48	≤24	20.9	男方因素	1	7.07	467	0.83	1	17.03	5.81	95.08	4	2	10.5	A-B	ICSI	0	0	0	0	0	0	0	是		无可移植胚胎
1084	0	C00007135	王娟	≥35	51	1	拮抗剂方案	2	283.333	＞10天	12	＞3000	3400	HCG	1	1	1	继发不孕	0.2	＞24	30.1	女方因素	4	3.19	1505	0.5	5	11.76	5.83	29	4	5	11.5	A	IVF	4	0	2	0	2	2	0	否	是	移植	未妊娠
1798	0	C00018249	傅琳	≥35	42	3	拮抗剂方案	2	225	≤10天	7	≤3000	1575	双扳机	1	1	0	继发不孕	1.10	≤24	23.1	混合因素	2	5.37	544.86	0.48	2	15.78	5.83	65	4	7	10.3	A	ICSI	2	0	2	2	0	0	0	否	否	全胚冷冻
1847	1	C00012026	傅琳	≥35	41	1	拮抗剂方案	2	371.875	≤10天	8	≤3000	2975	HCG	5	0	0	原发不孕	0.30	≤24	23.1	女方因素	2	15.31	435	0.61	2	15.78	5.83	65	4	6	1.13	A	IVF	2	0	1	0	1	1	0	否	是	移植	已妊娠	临床妊娠	宫外妊娠	异位妊娠
1912	1	C00008575	王娟	≥35	51	2	拮抗剂方案	2	387.5	≤10天	10	＞3000	3875	HCG	1	1	1	继发不孕	0.89	＞24	30.1	女方因素	2	3.4	499.54	0.87	2	11.76	5.83	29	4	3	12.8	A	IVF	0	0	1	0	0	0	0	否	否	全胚冷冻
1548	0	2016010089	孙玉霞	≥35	45	4	刺激方案	1	150	≤10天	6	≤3000	900	HCG	2	3	1	继发不孕	0.29	＞24	25.7	混合因素	3	12.27	1161	1.48	3	15.34	5.85	45.42	4	4	8.4	B	ICSI	1	0	1	0	0	0	0	否	否	全胚冷冻
1623	0	C00007819	孟红霞	≥35	46	1	刺激方案	1	162.5	≤10天	6	≤3000	975	双扳机	1	3	1	继发不孕	0.93	≤24	22.1	混合因素	2	8.05	939	0.54	2	7.25	5.85	66	4	8	0.52	B	ICSI	2	0	2	0	0	0	0	否	否	全胚冷冻
2076	1	2016100002	邵萍	≥35	44	1	降调节方案	3	393.75	＞10天	16	＞3000	6300	HCG	1	6	1	原发不孕	0.13	≤24	20.2	混合因素	1	8.27	534	1.06	1	10.95	5.85	36.43	4	3	6.9	A	ICSI	2	0	2	0	0	0	0	否	否	全胚冷冻
481	0	2018010071	孙俪	≥35	46	2	降调节方案	3	187.5	＞10天	12	≤3000	2250	HCG	3	1	1	继发不孕	0.57	≤24	23.4	混合因素	6	3.59	1722	1.36	7	9.9	5.86	44	4	8	8.7	A	ICSI	6	0	2	1	0	0	0	否	否	全胚冷冻
799	1	C00018465	王娟	≥35	42	2	拮抗剂方案	2	328.125	≤10天	8	≤3000	2625	HCG	5	4	2	继发不孕	0.98	≤24	20.7	女方因素	5	4.32	1631.13	0.77	5	9.9	5.86	44	4	6	8.6	A-B	IVF	3	0	0	0	0	0	0	是		无可移植胚胎
1617	1	2016060186	肖秀红	≥35	43	1	刺激方案	1	347.727	＞10天	11	＞3000	3825	HCG	6	0	0	继发不孕	0.45	≤24	22.6	女方因素	2	6.14	961	1.23	2	6.45	5.86	32.76	4	6	8	A-B	IVF	2	0	2	2	2	2	0	否	是	移植	已妊娠	临床妊娠	宫内妊娠	单胎宫内妊娠
1467	0	2017030088	张艳	≥35	42	1	降调节方案	3	238.636	＞10天	11	≤3000	2625	HCG	3	2	1	继发不孕	0.09	＞24	24.6	女方因素	3	4.12	954	0.34	3	11.3	5.87	43.67	4	4	10.2	A	IVF	0	0	0	0	0	0	0	是		未受精
1726	1	C00018804	王颖	≥35	48	4	刺激方案	1	300	≤10天	8	≤3000	2400	HCG	4	3	1	继发不孕	0.806	＞24	24.6	女方因素	2	10.39	692.14	2.78	1	8.87	5.88	40	4	3	3.8	B	IVF	0	0	0	0	0	0	0	是		无可移植胚胎
2150	1	2016040022	刘莹	＜35	28	1	降调节方案	3	292.5	≤10天	10	≤3000	2925	HCG	4	1	0	继发不孕	0.48	＞24	29.3	女方因素	1	5.83	373	0.72	0	9.8	5.89	86.43	3	3	12	A		0	0	0	0	0	0	0	是		未取到卵
2206	0	2016090175	刘莹	＜35	28	4	刺激方案	1	262.5	≤10天	4	≤3000	1050	HCG	4	1	0	继发不孕	0.91	＞24	29.3	女方因素	1	2.66	250	0.59	1	9.8	5.89	86.43	3	3	10	A	IVF	0	0	0	0	0	0	0	是		无可移植胚胎
2245	0	2016030157	修春苗	≥35	43	1	降调节方案	3	242.308	＞10天	13	＞3000	3150	HCG	1	2	1	继发不孕	0.11	≤24	20.7	男方因素	1	5.56	402	0.82	2	15.2	5.9	36.7	4	3	8.5	A	ICSI	2	0	2	0	2	2	0	否	是	移植	未妊娠
1445	1	2016030293	李玉菊	≥35	39	3	刺激方案	1	300	≤10天	8	≤3000	2400	HCG	6	1	1	继发不孕	0.69	≤24	22.7	女方因素	3	9.8	911	0.54	4	12.67	5.94	74.98	4	5	10	B	IVF	2	0	2	2	2	2	0	否	是	移植	已妊娠	临床妊娠	宫内妊娠	单胎宫内妊娠
1794	0	C00016594	颜宁宁	≥35	43	1	刺激方案	1	230.769	＞10天	13	≤3000	3000	HCG	8	3	2	继发不孕	0.80	＞24	25	女方因素	2	16.31	551	0.55	2	6.94	5.94	91	4	3	6.3	B-C	IVF	2	0	2	1	0	0	0	否	否	全胚冷冻
1958	1	2016030044	李玉菊	≥35	39	2	刺激方案	1	300	≤10天	8	≤3000	2400	HCG	6	1	1	继发不孕	0.69	≤24	22.7	女方因素	2	3.88	490	0.49	2	12.67	5.94	74.98	4	5	5.9	A-B	IVF	1	0	1	0	0	0	0	否	否	全胚冷冻
2192	0	2017120143	李玉娥	≥35	46	2	刺激方案	1	150	≤10天	7	≤3000	1050	HCG	10	3	1	继发不孕	0.37	≤24	22.4	女方因素	1	2.02	277	0.76	1	15.06	5.96	59	4	3	9	A	IVF	1	0	1	0	0	0	0	否	否	全胚冷冻
539	1	2017020144	张立群	≥35	45	1	刺激方案	1	402.273	＞10天	11	＞3000	4425	HCG	2	2	1	继发不孕	1.11	＞24	28.8	女方因素	6	2.28	2039	0.89	4	12.8	5.99	78.38	4	5	10.9	B	IVF	3	0	2	1	0	0	0	否	否	全胚冷冻
1373	0	C00011998	王田田	＜35	27	1	降调节方案	3	187.5	≤10天	10	≤3000	1875	HCG	1	2	0	继发不孕	0.43	＞24	27.3	女方因素	3	9.28	468	1.16	2	10.61	5.99	20	3	5	6.8	A-B	IVF	0	0	0	0	0	0	0	是		无可移植胚胎
1394	1	2016080073	吴倩	≥35	43	1	拮抗剂方案	2	403.125	≤10天	8	＞3000	3225	HCG	3	2	1	继发不孕	0.72	≤24	19.5	混合因素	3	4.83	897	0.28	1	15.07	5.99	91.75	4	5	10.5	A	ICSI	1	0	0	0	0	0	0	是		无可移植胚胎
1536	0	2016020050	蒋姗	＜35	34	1	刺激方案	1	225	≤10天	7	≤3000	1575	HCG	9	0	0	原发不孕	0.6	≤24	18.8	不明原因	3	2.2	1193	0.71	3	10.58	5.99	56.76	3	5	11.3	A	IVF	3	0	3	2	2	2	0	否	是	移植	已妊娠	临床妊娠	宫内妊娠	单胎宫内妊娠
1621	1	C00007140	许世娜	≥35	36	6	刺激方案	1	450	＞10天	11	＞3000	4950	HCG	6	0	0	原发不孕	0.194	≤24	18.4	女方因素	2	12.14	945	1	1	8.24	5.99	76.43	4	5	0.75	B	IVF	0	0	0	0	0	0	0	是		无可移植胚胎
2185	1	C00004521	许世娜	≥35	35	2	刺激方案	1	383.333	≤10天	9	＞3000	3450	HCG	6	0	0	原发不孕	1.06	≤24	18.4	女方因素	1	18.69	293	1.53	0	8.24	5.99	96.43	4	5	0.71	B		0	0	0	0	0	0	0	是		未取到卵
2208	1	2016090184	袁红彬	≥35	45	4	降调节方案	3	428.571	≤10天	7	≤3000	3000	HCG	5	6	1	继发不孕	0.2	＞24	24.4	混合因素	1	32.95	245	1.4	2	7.32	6	52	4	3	7.2	B-C	ICSI	3	0	2	1	0	0	0	否	否	全胚冷冻
839	0	2017090034	张馨元	≥35	39	1	拮抗剂方案	2	250	＞10天	15	＞3000	3750	HCG	1	1	1	继发不孕	1.1	≤24	24	混合因素	5	1.04	1398	1.2	4	7.57	6.01	26	4	6	13.6	B	ICSI	1	0	1	0	0	0	0	否	否	全胚冷冻
1925	1	C00019040	李秀梅	≥35	40	5	拮抗剂方案	2	450	＞10天	13	＞3000	5850	HCG	6	2	1	继发不孕	0.11	＞24	24.8	女方因素	2	30.97	468	1.93	1	14.86	6.02	62	4	4	9.5	A	IVF	0	0	0	0	0	0	0	是		无可移植胚胎
2027	0	C00018605	李秀梅	≥35	40	4	刺激方案	1	150	≤10天	8	≤3000	1200	HCG	6	2	1	继发不孕	0.22	＞24	24.8	混合因素	1	22.66	727.68	1.04	1	14.86	6.02	62	4	2	4.6	B	ICSI	1	0	0	0	0	0	0	是		无可移植胚胎
1159	0	C00004257	刘明雪	≥35	39	1	拮抗剂方案	2	225	≤10天	8	≤3000	1800	双扳机	5	3	1	继发不孕	0.92	＞24	26.7	女方因素	4	3.46	1230	0.53	3	14.08	6.07	91	4	7	10.4	A-B	IVF	2	0	2	1	0	0	0	否	否	全胚冷冻
2067	0	2017030176	林青荣	≥35	44	1	刺激方案	1	190.909	＞10天	11	≤3000	2100	HCG	2	3	1	继发不孕	0.26	＞24	26.6	女方因素	1	8	573	0.29	1	13.89	6.07	24	4	2	8.4	B	IVF	1	0	0	0	0	0	0	是		无可移植胚胎
1656	1	2017010066	张新云	≥35	46	4	刺激方案	1	476.786	＞10天	14	＞3000	6675	HCG	2	5	1	继发不孕	0.87	＞24	26.2	男方因素	2	7.07	849	1.1	2	16.38	6.12	74.64	4	3	8.5	B	ICSI	1	0	0	0	1	1	0	否	是	移植	未妊娠
1894	0	2016080053	张新云	≥35	45	3	拮抗剂方案	2	139.286	≤10天	7	≤3000	975	HCG	2	5	1	继发不孕	0.67	＞24	26.2	女方因素	2	9.23	196	2.11	0	16.38	6.12	74.64	4	3	9.4	B		0	0	0	0	0	0	0	是		未取到卵
2270	0	2017120086	张莹莹	＜35	27	1	拮抗剂方案	2	150	≤10天	7	≤3000	1050	HCG	2	0	0	原发不孕	0.91	≤24	20.8	女方因素	1	8.56	315	0.56	0	14.38	6.12	40	3	4				0	0	0	0	0	0	0	是		未取到卵
1291	0	2016060213	于艳	≥35	36	1	降调节方案	3	225	≤10天	8	≤3000	1800	HCG	2	4	1	继发不孕	0.4	≤24	21.7	女方因素	3	0.38	804	0.61	6	9.05	6.13	43	4	6	13.8	A-B	IVF	5	0	2	0	0	0	0	否	否	全胚冷冻
2012	0	2016040255	郑伟	≥35	37	5	刺激方案	1	262.5	≤10天	8	≤3000	2100	HCG	4	0	0	原发不孕	0.65	≤24	22.2	混合因素	1	14.58	842	0.67	1	12.45	6.13	24	4	4	5.6	B	ICSI	1	0	1	0	0	0	0	否	否	全胚冷冻
2244	0	2016010135	郑伟	≥35	37	4	刺激方案	1	234.375	＞10天	16	＞3000	3750	双扳机	5	0	0	原发不孕	0.47	≤24	22.2	混合因素	1	11.74	324	0.8	1	12.45	6.13	24	4	4	5.6	A	ICSI	1	0	1	0	0	0	0	否	否	全胚冷冻
1176	0	2016070009	刘汉婕	≥35	40	1	降调节方案	3	262.5	≤10天	10	≤3000	2625	HCG		0	0	原发不孕	0.43	＞24	24.1	女方因素	4	8.98	1149	1.09	1	17.83	6.16	79.35	4	3	16	A	IVF	1	0	1	0	1	1	0	否	是	移植	未妊娠
914	1	C00014913	赵云惠	≥35	42	2	刺激方案	1	300	＞10天	13	＞3000	3900	HCG	3	3	1	继发不孕	0.72	≤24	21.3	女方因素	4	8.45	958	2.38	1	8.5	6.17	77.45	4	6	0.93	B	IVF	0	0	0	0	0	0	0	是		无可移植胚胎
872	1	2017120141	唐君峰	≥35	44	3	拮抗剂方案	2	325	≤10天	7	≤3000	2275	HCG	2	1	1	继发不孕	0.47	≤24	23.9	男方因素	5	4.54	1179	0.73	6	9.49	6.19	97.66	4	9	13.7	A	ICSI	3	0	0	0	0	0	0	是		无可移植胚胎
1351	0	C00012952	赵莹莹	＜35	31	1	拮抗剂方案	2	285.714	＞10天	14	＞3000	4000	HCG	1	3	0	继发不孕	1.04	＞24	33.3	女方因素	3	1.65	577	0.45	1	9.45	6.2	45.27	3	7			IVF	1	0	1	1	1	1	0	否	是	移植	已妊娠	临床妊娠	宫内妊娠	单胎宫内妊娠
2018	1	C00007305	刘婷婷	≥35	43	1	拮抗剂方案	2	300	≤10天	5	≤3000	1500	双扳机	2	3	1	继发不孕	0.76	≤24	21.5	女方因素	1	4.04	784	0.42	0	10.58	6.2	45	4	6	1	A		0	0	0	0	0	0	0	是		未取到卵
1469	1	2018040065	左云芳	≥35	47	7	刺激方案	1	375	≤10天	9	＞3000	3375	HCG	3	3	1	继发不孕	0.89	≤24	22.1	女方因素	3	12.35	948	1.01	2	19.78	6.22	40.37	4	2	4.2	C	IVF	0	0	1	0	0	0	0	否	否	全胚冷冻
1496	1	C00009832	高世芹	≥35	39	1	刺激方案	1	450	≤10天	9	＞3000	4050	HCG	4	1	0	继发不孕	0.36	≤24	21	混合因素	3	1.35	961	1.35	2	6.78	6.22	40.37	4	6	0.61	A-B	ICSI	0	0	1	0	0	0	0	否	否	全胚冷冻
1646	0	2017030321	左云芳	≥35	46	5	刺激方案	1	279.545	＞10天	11	＞3000	3075	HCG	1	3	1	继发不孕	0.55	≤24	22.1	混合因素	2	1.44	87	1.1	0	19.78	6.22	40.37	4	2	6			0	0	0	0	0	0	0	是		未取到卵
2143	1	C00011747	张蒙蒙	＜35	34	1	刺激方案	1	318.75	≤10天	8	≤3000	2550	双扳机	1	0	0	原发不孕	0.79	≤24	22.2	女方因素	1	1.97	383	0.24	1	9.78	6.22	40.37	3	5	7.6	A	IVF	1	0	1	0	0	0	0	否	否	全胚冷冻
2214	0	2016090013	左云芳	≥35	45	4	刺激方案	1	225	≤10天	4	≤3000	900	HCG	1	3	1	继发不孕	0.74	≤24	22.1	女方因素	1	7.85	226	0.51	1	19.78	6.22	40.37	4	2	6.3	B	IVF	0	0	1	0	0	0	0	否	否	全胚冷冻
2240	0	2017080135	左云芳	≥35	46	6	刺激方案	1	150	≤10天	4	≤3000	600	HCG	1	3	1	继发不孕	0.55	≤24	22.1	女方因素	1	9.16	144	0.54	1	19.78	6.22	40.37	4	2	6.5	B	IVF	0	0	0	0	0	0	0	是		无可移植胚胎
1853	0	2018070072	李庆荣	≥35	35	2	降调节方案	3	250	＞10天	12	≤3000	3000	HCG	2	0	0	原发不孕	0.57	≤24	23	女方因素	2	3.05	417	1.02	2	8.48	6.23	59.09	4	6	10.7	A	IVF	2	0	2	1	2	2	0	否	是	移植	已妊娠	临床妊娠	宫内妊娠	单胎宫内妊娠
1088	1	C00012620	薛银春	≥35	36	1	降调节方案	3	312.727	＞10天	11	＞3000	3440	HCG	1	2	0	继发不孕	0.6	＞24	30	女方因素	4	10.28	1490	1.06	3	13.41	6.24	53	4	5	13	A	IVF	2	0	2	0	0	0	0	否	否	全胚冷冻
1169	1	2017040101	郇长花	≥35	40	1	刺激方案	1	425	≤10天	5	≤3000	2125	HCG	1	0	0	继发不孕	0.53	＞24	27.2	混合因素	4	9.97	1189	0.93	3	15.28	6.25	55.46	4	5	8.8	B	ICSI	3	0	2	0	2	2	0	否	是	移植	未妊娠
1717	1	C00009742	张金玲	≥35	42	5	拮抗剂方案	2	350	≤10天	9	＞3000	3150	双扳机	2	2	1	继发不孕	0.84	≤24	21.5	女方因素	2	4.54	715	0.33	1	17.81	6.25	31	4	6	6.4	A-B	IVF	1	0	1	0	0	0	0	否	否	全胚冷冻
2215	0	2018070047	郇长花	≥35	41	3	拮抗剂方案	2	225	≤10天	6	≤3000	1350	HCG	2	1	1	继发不孕	0.66	＞24	27.2	混合因素	1	3.25	219	0.38	1	15.28	6.25	55.46	4	5	9.9	B	ICSI	1	0	1	0	1	1	0	否	是	移植	未妊娠
1444	0	C00006182	高井红	≥35	44	3	刺激方案	1	225	≤10天	6	≤3000	1350	HCG	10	3	2	继发不孕	0.91	≤24	21.3	女方因素	3	4.1	913	0.68	3	18.93	6.29	59	4	8	9.2	A	IVF	3	0	2	0	2	2	0	否	是	移植	未妊娠
1174	1	2016060052	李玲玲	＜35	29	1	降调节方案	3	390	≤10天	10	＞3000	3900	HCG	4	0	0	原发不孕	0.28	≤24	23.7	女方因素	4	2.67	1159	0.95	3	9.6	6.3	21.3	3	5	9.4	B	IVF	3	0	2	0	2	2	0	否	是	移植	已妊娠	临床妊娠	宫内妊娠	单胎宫内妊娠
2248	1	2017050004	赵丙兰	≥35	42	2	刺激方案	1	341.667	≤10天	9	＞3000	3075	HCG	1	5	2	继发不孕	0.94	＞24	24.6	女方因素	1	5.11	463.5	0.39	1	12.68	6.3	65.42	4	5	16.8	B	IVF	1	0	1	1	0	0	0	否	否	全胚冷冻
1382	1	C00017378	张艳	≥35	40	2	拮抗剂方案	2	331.25	＞10天	12	＞3000	3975	HCG	4	1	1	继发不孕	0.7	＞24	27.5	男方因素	3	2.1	526	0.44	2	9.36	6.34	42	4	5	10	A	ICSI	2	0	2	2	2	2	0	否	是	移植	已妊娠	临床妊娠	宫内妊娠	单胚胎停
218	0	2016060172	巩伟伟	＜35	28	1	降调节方案	3	243.75	＞10天	16	＞3000	3900	HCG	3	0	0	原发不孕	1.16	＞24	27.5	女方因素	8	2.34	1655	1.86	5	5.43	6.35	11	3	6	12.5	A	IVF	2	0	2	0	0	0	0	否	否	全胚冷冻
827	0	2017090180	韩丽萍	≥35	45	7	降调节方案	3	288.462	＞10天	13	＞3000	3750	HCG	7	0	0	原发不孕	0.83	＞24	26	混合因素	5	1.93	1452	0.51	2	6.37	6.35	26	4	7	11.5	A	ICSI	1	0	1	0	0	0	0	否	否	全胚冷冻
926	0	2018060248	韩丽萍	≥35	46	4	拮抗剂方案	2	281.818	＞10天	11	＞3000	3100	HCG	16	0	0	原发不孕	0.95	＞24	26	混合因素	4	4.85	885	0.63	3	6.37	6.35	26	4	6	8.5	A	ICSI	2	0	2	2	0	0	0	否	否	全胚冷冻
1248	1	2018050037	韩丽萍	≥35	46	8	降调节方案	3	350	＞10天	15	＞3000	5250	HCG	7	0	0	原发不孕	0.11	＞24	26	混合因素	3	1.55	913	0.24	1	6.37	6.35	26	4	5	8.4	A	ICSI	1	0	1	0	1	1	0	否	是	移植	未妊娠
1278	0	C00005110	韩丽萍	≥35	47	6	拮抗剂方案	2	288.462	＞10天	13	＞3000	3750	双扳机	16	0	0	原发不孕	0.904	＞24	26	男方因素	3	3.37	853	0.87	2	6.37	6.35	26	4	4	8.8	A	ICSI	2	0	1	1	0	0	0	否	否	全胚冷冻
1814	0	C00004523	韩丽萍	≥35	47	5	拮抗剂方案	2	272.222	≤10天	9	≤3000	2450	双扳机	16	0	0	原发不孕	0.64	＞24	26	男方因素	2	5.6	522	0.38	3	6.37	6.35	26	4	5	8.4	A	ICSI	3	0	2	1	0	0	0	否	否	全胚冷冻
1175	1	2016060251	亓宗娥	≥35	44	1	刺激方案	1	300	≤10天	10	≤3000	3000	HCG	6	4	1	继发不孕	1.00	＞24	25.5	女方因素	4	11.01	1149	1.08	2	9.04	6.38	67	4	7	11	B	IVF	1	0	0	0	0	0	0	是		无可移植胚胎
1336	0	2016090007	亓宗娥	≥35	44	2	刺激方案	1	278.571	≤10天	7	≤3000	1950	HCG	6	4	1	继发不孕	0.74	＞24	25.5	女方因素	3	5.6	639	0.81	2	9.04	6.38	67	4	7	14.4	B	IVF	1	0	0	0	0	0	0	是		无可移植胚胎
1667	0	C00004982	罗俊玲	≥35	43	1	刺激方案	1	225	≤10天	10	≤3000	2250	HCG	3	1	1	继发不孕	0.30	≤24	22.9	女方因素	2	15.75	832	0.9	1	14.47	6.39	80	4	3	5.4	A	IVF	0	0	0	0	0	0	0	是		无可移植胚胎
1756	1	C00016423	张振林	≥35	37	1	降调节方案	3	316.071	＞10天	14	＞3000	4425	HCG	7	5	2	继发不孕	0.54	≤24	22.6	女方因素	2	2.73	621	0.5	1	16.17	6.39	59	4	6	13.5	A	IVF	1	0	0	0	0	0	0	是		无可移植胚胎
2231	1	C00008634	王凤麟	≥35	46	1	拮抗剂方案	2	581.25	≤10天	8	＞3000	4650	HCG	0	1	0	继发不孕	0.09	＞24	25.4	混合因素	1	4.88	156	0.04	1	5.23	6.39	54.65	4	3	0.99	B	ICSI	1	0	1	0	1	1	0	否	是	移植	未妊娠
1440	1	2016030163	刘冬梅	≥35	40	2	降调节方案	3	472.222	≤10天	9	＞3000	4250	HCG	1	2	1	继发不孕	0.74	≤24	22	男方因素	3	8.97	926	0.8	4	10.85	6.4	49.86	4	6	10.7	A	ICSI	3	0	2	1	0	0	0	否	否	全胚冷冻
1972	0	2017020047	王清淑	≥35	46	3	刺激方案	1	150	≤10天	8	≤3000	1200	HCG	5	4	1	继发不孕	0.415	≤24	19.9	女方因素	2	14.09	451	0.66	2	16.72	6.41	62.39	4	3	4.5	A	IVF	2	0	1	0	0	0	0	否	否	全胚冷冻
1375	0	2017030130	张静	≥35	38	1	刺激方案	1	150	≤10天	5	≤3000	750	HCG	9	0	0	原发不孕	1.05	＞24	29.4	混合因素	3	10.7	448	1.88	3	8.14	6.42	48.65	4	7	8.7	B	ICSI	3	0	2	0	0	0	0	否	否	全胚冷冻
1417	0	C00011714	游双慧	≥35	39	2	刺激方案	1	180	≤10天	10	≤3000	1800	双扳机	5	3	1	继发不孕	0.34	≤24	19.7	女方因素	3	18.45	848	1.4	2	14.7	6.43	49.09	4	3	7.2	B-C	IVF	1	0	1	1	0	0	0	否	否	全胚冷冻
1565	0	C00012613	游双慧	≥35	39	3	刺激方案	1	218.182	＞10天	11	≤3000	2400	HCG	6	3	1	继发不孕	0.28	≤24	19.7	女方因素	3	22.3	1098	1.07	2	14.7	6.43	39.09	4	3	6.4	B-C	IVF	1	0	1	0	0	0	0	否	否	全胚冷冻
1706	1	C00015730	杜艳君	≥35	35	1	拮抗剂方案	2	322.222	≤10天	9	≤3000	2900	HCG	2	2	1	继发不孕	0.41	≤24	19.5	女方因素	2	13.99	740	1.06	2	13.39	6.43	56	4	5	0.59	A-B	IVF	0	0	0	0	0	0	0	是		无可移植胚胎
2037	0	C00010570	游双慧	≥35	39	1	刺激方案	1	225	≤10天	8	≤3000	1800	HCG	5	3	1	继发不孕	0.26	≤24	22	混合因素	1	12.51	681	1.03	0	14.7	6.43	59.09	4	3	5.9	A		0	0	0	0	0	0	0	是		未取到卵
1631	1	2016080070	崔晶	＜35	34	1	刺激方案	1	375	≤10天	6	≤3000	2250	HCG	4	0	0	原发不孕	0.54	＞24	28	女方因素	2	0.89	910	1.01	0	14.52	6.45	57	3	3	9.8	A-B		0	0	0	0	0	0	0	是		未取到卵
2028	0	2018060084	杨咏梅	≥35	43	1	刺激方案	1	150	≤10天	6	≤3000	900	HCG	1	4	1	继发不孕	0.07	≤24	19.8	混合因素	1	13.81	719	0.47	1	18.97	6.45	84	4	3	5.5		ICSI	0	0	0	0	0	0	0	是		无可移植胚胎
1733	1	2016040088	赵洪燕	＜35	33	1	降调节方案	3	375	≤10天	8	≤3000	3000	HCG	4	1	1	继发不孕	0.272	＞24	24.8	混合因素	2	9.11	672	1.12	0	7.47	6.46	84.41	3	3	9.2	A		0	0	0	0	0	0	0	是		未取到卵
1839	1	2018030224	王文霞	≥35	40	1	刺激方案	1	403.125	＞10天	16	＞3000	6450	HCG	5	0	0	原发不孕	0.031	＞24	27.7	混合因素	2	7.77	468	0.13	1	8.99	6.46	84.41	4	3	6.8	B-C	ICSI	1	0	0	0	0	0	0	是		无可移植胚胎
2239	0	2016010090	赵桂荣	≥35	45	2	刺激方案	1	187.5	≤10天	10	≤3000	1875	HCG	6	3	1	继发不孕	0.9	＞24	25.3	混合因素	1	5.34	116	0.76	0	16.63	6.48	74.77	4	3	4.8	B		0	0	0	0	0	0	0	是		未取到卵
1584	1	C00010956	李玲玲	＜35	32	3	刺激方案	1	450	≤10天	10	＞3000	4500	HCG	2	0	0	继发不孕	1.1	≤24	23.7	女方因素	3	2.82	1040	0.51	2	7.34	6.5	30.87	3	6	1.07	B	IVF	2	0	0	0	0	0	0	是		无可移植胚胎
1615	0	2016040125	孟凡芝	≥35	44	1	刺激方案	1	225	≤10天	7	≤3000	1575	HCG	4	2	1	继发不孕	0.33	＞24	24.9	混合因素	2	1.03	962	1	1	8.64	6.5	39	4	4		A	ICSI	1	0	1	1	0	0	0	否	否	全胚冷冻
1635	1	2017050105	王桂英	≥35	44	4	拮抗剂方案	2	350	≤10天	9	＞3000	3150	HCG	8	2	0	继发不孕	0.73	＞24	25.7	男方因素	2	29.29	897	2.37	1	12.28	6.5	96.43	4	3	6.7	B	ICSI	0	0	0	0	0	0	0	是		无可移植胚胎
2008	1	2017030066	王桂英	≥35	44	3	降调节方案	3	425	＞10天	11	＞3000	4675	HCG	8	2	0	继发不孕	0.23	＞24	25.7	女方因素	1	10.13	928	1.02	0	12.28	6.5	46.43	4	3	7.5	A		0	0	0	0	0	0	0	是		未取到卵
2144	0	2017060035	王桂英	≥35	44	5	降调节方案	3	195	≤10天	5	≤3000	975	HCG	8	3	1	继发不孕	0.01	＞24	25.7	男方因素	1	17.92	382	1.76	1	12.28	6.5	86.43	4	3	7.9	A-B	ICSI	1	0	1	0	2	2	0	否	是	移植	未妊娠
2256	1	2017100221	孟凡芝	≥35	45	4	刺激方案	1	375	≤10天	7	≤3000	2625	HCG	4	2	1	继发不孕	0.42	＞24	24.9	混合因素	1	9.35	340	0.5		8.64	6.5	47.4	4	4			ICSI	1	0	1	0	0	0	0	否	否	全胚冷冻
1710	0	C00018148	黄英	≥35	42	2	刺激方案	1	150	≤10天	8	≤3000	1200	HCG	5	1	1	继发不孕	0.16	＞24	25	混合因素	2	21.54	733.28	0.7	0	17.8	6.55	38	4	2	8.9	B		0	0	0	0	0	0	0	是		未取到卵
2194	0	2018010125	沈江玲	≥35	46	1	拮抗剂方案	2	171.429	＞10天	14	≤3000	2400	双扳机	3	2	1	继发不孕	0.36	≤24	19.5	女方因素	1	25.58	273	1.05		19.61	6.55	78.46	4	2	9.6	A		0	0	0	0	0	0	0	是		未取卵
656	1	2018040082	许福霞	≥35	41	2	刺激方案	1	415.909	＞10天	11	＞3000	4575	HCG	3	1	0	继发不孕	1.12	≤24	23.1	女方因素	5	1.88	676	2.02	2	14.83	6.56	46.23	4	6	8.5	A-B	IVF	1	0	1	0	0	0	0	否	否	全胚冷冻
1552	1	2017110026	许福霞	≥35	41	1	降调节方案	3	371.429	≤10天	7	≤3000	2600	HCG	3	1	0	继发不孕	0.33	≤24	23.1	混合因素	3	10.09	1148	0.89	2	14.83	6.56	46.23	4	6	9.8	A	ICSI	1	0	0	0	0	0	0	是		无可移植胚胎
2091	1	2016110180	崔荣贵	≥35	39	3	降调节方案	3	291.667	≤10天	9	≤3000	2625	HCG	3	2	1	继发不孕	0.30	＞24	26.5	混合因素	1	10.77	493	1.87	1	10.61	6.59	44.4	4	3	10.1	A	ICSI	1	0	1	0	1	1	0	否	是	移植	未妊娠
1660	0	2016100121	夏丽丽	≥35	43	5	拮抗剂方案	2	215.625	≤10天	8	≤3000	1725	HCG	3	9	2	继发不孕	0.76	≤24	23.7	女方因素	2	8.37	842	1.13	2	6.52	6.6	92.17	4	4	10.3	B-C	IVF	2	0	2	1	0	0	0	否	否	全胚冷冻
1718	1	2016080164	夏丽丽	≥35	42	4	刺激方案	1	300	≤10天	10	≤3000	3000	HCG	3	9	2	继发不孕	0.76	≤24	23.7	女方因素	2	6.17	714	0.36	2	6.52	6.6	92.17	4	4	9.8	B	IVF	1	0	2	1	0	0	0	否	否	全胚冷冻
1785	0	2016060153	夏丽丽	≥35	42	3	刺激方案	1	262.5	≤10天	8	≤3000	2100	HCG	3	9	1	继发不孕	0.76	≤24	23.7	女方因素	2	2.66	574	0.32	2	6.52	6.6	92.17	4	4	8.7	B	IVF	2	0	2	1	2	2	0	否	是	移植	未妊娠
2197	0	C00011211	张迎秋	≥35	43	1	刺激方案	1	150	≤10天	5	≤3000	750	HCG	5	2	1	继发不孕	0.2	≤24	18.8	女方因素	1	6.89	269	1.12	1	18.56	6.6	20	4	3	7.3	A	IVF	1	0	1	0	1	1	0	否	是	移植	未妊娠
1908	0	2017100139	贾秀萍	≥35	36	2	刺激方案	1	150	＞10天	11	≤3000	1650	双扳机	2	2	1	继发不孕	0.66	≤24	21.3	女方因素	2	10.89	506	0.71	2	13.16	6.61	87.7	4	5	6.8	B	IVF	2	0	1	1	0	0	0	否	否	全胚冷冻
2160	0	C00007404	刘金华	≥35	41	3	刺激方案	1	233.333	≤10天	9	≤3000	2100	HCG	4	4	1	继发不孕	0.15	≤24	22.6	女方因素	1	9.35	340	0.5	1	12.42	6.61	51.7	4	4	5.2	B	IVF	0	0	0	0	0	0	0	是		未受精
2255	0	2017120199	贾秀萍	≥35	36	3	刺激方案	1	150	≤10天	7	≤3000	1050	HCG	2	2	1	继发不孕	0.2	≤24	21.3	女方因素	1	7.69	342	1.17	1	13.16	6.61	87.7	4	3			IVF	1	0	1	0	0	0	0	否	否	全胚冷冻
1185	1	C00016156	付学辉	≥35	43	1	降调节方案	3	340.909	＞10天	11	＞3000	3750	HCG	2	3	0	继发不孕	0.29	≤24	19.4	女方因素	4	2.18	1121	0.65	4	14.08	6.62	46.7	4	8	8.7	A	IVF	3	0	2	0	2	2	0	否	是	移植	未妊娠
1831	0	C00011541	何梦珠	＜35	30	1	刺激方案	1	274.107	＞10天	14	＞3000	3837.5	双扳机	4	0	0	原发不孕	0.829	≤24	23.8	混合因素	2	28.19	490	0.49	1	16.36	6.64	17	3	5	6.2	B	ICSI	1	0	1	1	0	0	0	否	否	全胚冷冻
993	1	C00011796	王爱敏	≥35	42	2	拮抗剂方案	2	300	＞10天	11	＞3000	3300	HCG	2	3	1	继发不孕	1.09	＞24	27.3	女方因素	4	4.39	1307.54	1.12	1	5.79	6.66	46	4	7	0.87	A-B	IVF	0	0	0	0	0	0	0	是		无可移植胚胎
1868	1	2016090046	秦学芳	≥35	41	1	刺激方案	1	300	≤10天	5	≤3000	1500	HCG	1	1	1	继发不孕	1.09	≤24	22.2	女方因素	2	2.63	360	1.09	1	12.84	6.67	18	4	4	14	A	IVF	1	0	1	0	0	0	0	否	否	全胚冷冻
1626	0	2016110081	崔兰玲	≥35	45	2	刺激方案	1	225	≤10天	9	≤3000	2025	HCG	1	2	1	继发不孕	0.21	＞24	24.2	混合因素	2	5.36	932	0.53	6	20.67	6.68	43	4	6	11.4	B-C	ICSI	4	0	2	1	0	0	0	否	否	全胚冷冻
2064	1	2016070097	崔兰玲	≥35	45	1	刺激方案	1	300	≤10天	8	≤3000	2400	HCG	1	2	1	继发不孕	1.0	＞24	24.2	混合因素	1	5.51	588	1.03	1	20.67	6.68	43	4	5		B	ICSI	1	0	0	0	0	0	0	是		无可移植胚胎
2238	0	2017120272	王同艳	≥35	44	1	刺激方案	1	135	≤10天	5	≤3000	675	HCG	1	2	1	继发不孕	0.19	≤24	22.3	男方因素	1	17.38	121	0.43	1	16.24	6.68	65	4	5	9.5	A	IVF	0	0	0	0	0	0	0	是		无可移植胚胎
865	1	C00013416	刘静	≥35	44	2	刺激方案	1	300	≤10天	9	≤3000	2700	HCG	2	4	1	继发不孕	0.7	＞24	24.2	女方因素	5	0.75	1209	1.23	5	9.9	6.69	28.73	4	9	0.94	A	IVF	4	0	4	1	0	0	0	否	否	全胚冷冻
934	1	C00018499	汪晓宁	＜35	33	2	刺激方案	1	450	≤10天	10	＞3000	4500	HCG	3	1	1	继发不孕	1.05	≤24	20.6	女方因素	4	2.14	844.63	0.23	2	7.1	6.7	83	3	6	11.8	A-B	IVF	2	0	1	1	1	1	0	否	是	移植	未妊娠
353	1	2016060256	王传冬	≥35	42	2	刺激方案	1	313.636	＞10天	11	＞3000	3450	HCG	2	4	1	继发不孕	0.65	＞24	25.4	混合因素	7	7.98	1831	3.46	5	12.89	6.72	25.52	4	5	11.7	B	ICSI	1	0	1	0	0	0	0	否	否	全胚冷冻
1582	1	2016030047	王传冬	≥35	42	1	刺激方案	1	300	≤10天	10	≤3000	3000	HCG	2	4	1	继发不孕	0.64	＞24	25.4	混合因素	3	8.43	1042	1.76	3	12.89	6.72	25.52	4	5	6.1	B	ICSI	2	0	2	0	0	0	0	否	否	全胚冷冻
1629	0	2016080201	王传冬	≥35	42	3	刺激方案	1	287.5	＞10天	12	＞3000	3450	HCG	2	4	1	继发不孕	1.0	＞24	25.4	混合因素	2	1.1	912	1	2	12.89	6.72	25.52	4	5	7	B	ICSI	1	0	1	0	0	0	0	否	否	全胚冷冻
1027	1	2017030257	解玲玲	≥35	40	1	刺激方案	1	360	≤10天	10	＞3000	3600	HCG	2	3	1	继发不孕	0.35	≤24	21.2	女方因素	4	2.81	1149	0.59	4	14.96	6.73	86.43	4	6	14.3	A-B	IVF	4	0	2	1	2	2	0	否	是	移植	未妊娠
1304	1	2018060027	解玲玲	≥35	41	3	刺激方案	1	408.333	≤10天	9	＞3000	3675	HCG	2	3	1	继发不孕	0.58	≤24	21.2	不明原因	3	11.38	769	0.69	3	14.96	6.73	96.43	4	6	7.1	B	IVF	3	0	2	1	0	0	0	否	否	全胚冷冻
1784	1	2018020124	解玲玲	≥35	41	2	刺激方案	1	375	≤10天	10	＞3000	3750	HCG	2	3	1	继发不孕	0.36	≤24	21.2	不明原因	2	12.66	575	0.69	1	14.96	6.73	86.43	4	6	7.2	B	IVF	1	0	1	1	0	0	0	否	否	全胚冷冻
1829	1	C00013082	刘明婧	＜35	30	1	降调节方案	3	320.455	＞10天	11	＞3000	3525	HCG	6	1	0	继发不孕	0.56	＞24	27	女方因素	2	1.77	490	0.3	2	12.36	6.75	34	3	6	11.7	A	IVF	2	0	2	2	2	2	0	否	是	移植	已妊娠	临床妊娠	宫内妊娠	双胎宫内妊娠
282	1	2017040025	张慧	≥35	41	3	刺激方案	1	431.25	＞10天	12	＞3000	5175	HCG	5	2	1	继发不孕	0.83	≤24	20.2	女方因素	7	1.4	2092	0.94	4	11.83	6.78	36.43	4	7	8.6	A	IVF	3	0	2	0	0	0	0	否	否	全胚冷冻
904	0	C00012266	朱吉芳	≥35	44	1	拮抗剂方案	2	276.923	＞10天	13	＞3000	3600	双扳机	2	1	0	继发不孕	0.94	＞24	25.4	女方因素	5	8.53	1237	1.38	2	18.22	6.78	23	4	4	5.9	A	IVF	1	0	1	0	0	0	0	否	否	全胚冷冻
1411	1	2017090115	张慧	≥35	42	4	刺激方案	1	375	≤10天	10	＞3000	3750	HCG	5	2	1	继发不孕	0.91	≤24	20.2	女方因素	3	16.32	858	1.21	4	11.83	6.78	78.43	4	5	4.6	A	IVF	3	0	2	0	0	0	0	否	否	全胚冷冻
1553	1	2018010154	张慧	≥35	42	5	刺激方案	1	293.75	＞10天	12	＞3000	3525	HCG	5	2	1	继发不孕	0.14	≤24	20.2	女方因素	3	26.32	1148	1.05	2	11.83	6.78	66.43	4	4	5.5	A	IVF	1	0	0	0	0	0	0	是		无可移植胚胎
1992	0	C00016087	朱吉芳	≥35	45	2	拮抗剂方案	2	216.667	≤10天	9	≤3000	1950	HCG	2	1	0	继发不孕	0.66	＞24	25.4	混合因素	2	16.08	321	1.21		18.22	6.78	23	4	4	10.4	A		0	0	0	0	0	0	0	是		未取卵
2047	0	2016070068	张秀芝	≥35	46	4	刺激方案	1	150	≤10天	6	≤3000	900	HCG	3	4	0	继发不孕	0.55	≤24	21.4	混合因素	1	11.01	656	0.57	2	10.4	6.78	46	4	3	12.2	A-B	ICSI	2	0	2	0	0	0	0	否	否	全胚冷冻
1808	0	C00007344	邢丽君	≥35	36	1	拮抗剂方案	2	150	≤10天	7	≤3000	1050	HCG	5	1	1	继发不孕	1.09	≤24	20.3	女方因素	2	7.35	532	0.56	2	8.88	6.83	63	4	4	11.7	A	IVF	2	0	1	0	1	1	0	否	是	移植	未妊娠
770	0	C00013001	赵益芬	≥35	43	2	拮抗剂方案	2	279.545	＞10天	11	＞3000	3075	HCG	16	0	0	原发不孕	0.64	≤24	21.8	女方因素	5	3.25	1804	1.22	7	7.07	6.84	35	4	10	11	B	IVF	4	1	1	0	0	0	0	否	否	全胚冷冻
1235	0	C00017055	李敏敏	≥35	37	7	拮抗剂方案	2	225	≤10天	7	≤3000	1575	HCG	8	0	0	原发不孕	1.04	≤24	21.4	混合因素	3	10.16	955	1.38	3	12.3	6.84	76.46	4	4	0.84	A	ICSI	2	0	1	0	0	1	0	否	是	移植	未妊娠
1246	1	2016100169	江秀霞	≥35	41	1	刺激方案	1	332.143	＞10天	14	＞3000	4650	HCG	1	4	1	继发不孕	0.47	≤24	22	女方因素	3	5.2	926	0.81	3	5.97	6.84	38.25	4	3	13.2	A	IVF	2	0	1	0	0	0	0	否	否	全胚冷冻
1269	0	C00018858	李敏敏	≥35	37	8	刺激方案	1	150	≤10天	6	≤3000	900	HCG	8	0	0	原发不孕	1.04	≤24	21.4	混合因素	3	12.43	873.78	0.76	1	12.3	6.84	76.46	4	4	5.3	A	ICSI	1	0	1	1	0	0	0	否	否	全胚冷冻
1310	0	2018050083	李敏敏	＜35	33	1	刺激方案	1	237.5	＞10天	12	≤3000	2850	HCG	6	0	0	原发不孕	1.04	≤24	21.4	混合因素	3	28.92	734	1.52	1	12.3	6.84	76.46	3	4	5.2	B	ICSI	1	0	1	0	0	0	0	否	否	全胚冷冻
1339	0	2018040127	江秀霞	≥35	43	6	拮抗剂方案	2	275	≤10天	9	≤3000	2475	HCG	1	4	1	继发不孕	0.66	≤24	22	不明原因	3	1.65	635	0.19	3	5.97	6.84	38.25	4	7	14.1	A-B	ICSI	1	0	1	0	1	1	0	否	是	移植	已妊娠	临床妊娠	宫内妊娠	单胚胎停
1691	0	2017090208	江秀霞	≥35	42	4	刺激方案	1	241.667	＞10天	12	≤3000	2900	HCG	1	4	1	继发不孕	0.39	≤24	22	混合因素	2	11.75	771	0.54	0	5.97	6.84	38.25	4	3	7.4	B		0	0	0	0	0	0	0	是		未取到卵
1809	0	C00004678	江秀霞	≥35	43	7	拮抗剂方案	2	258.333	≤10天	9	≤3000	2325	双扳机	1	5	1	继发不孕	0.54	≤24	22	女方因素	2	1.5	530	0.28	1	5.97	6.84	38.25	4	2	11.1	B	IVF	1	0	1	1	1	1	0	否	是	移植	未妊娠
1875	1	2017110127	江秀霞	≥35	42	5	刺激方案	1	300	＞10天	12	＞3000	3600	HCG	1	4	1	继发不孕	0.96	≤24	22	混合因素	2	1.81	327	0.24	1	5.97	6.84	38.25	4	3	11.3	B	ICSI	1	0	1	0	0	0	0	否	否	全胚冷冻
2128	0	2017020137	江秀霞	≥35	41	2	刺激方案	1	267.857	＞10天	14	＞3000	3750	双扳机	1	4	1	继发不孕	0.78	≤24	22	女方因素	1	4.35	417	0.58	1	5.97	6.84	38.25	4	2	10.7	B	IVF	1	0	1	0	0	0	0	否	否	全胚冷冻
2021	1	C00014079	付荣	≥35	47	1	拮抗剂方案	2	361.111	≤10天	9	＞3000	3250	双扳机	1	3	0	继发不孕	0.25	≤24	21.6	女方因素	1	24.44	759	0.83		10.95	6.87	81	4	2	5.1	B-C		0	0	0	0	0	0	0	是		未取卵
1299	1	2016120210	周秀娟	≥35	39	3	刺激方案	1	300	≤10天	10	≤3000	3000	HCG	11	0	0	原发不孕	0.77	＞24	28.8	男方因素	3	0.8	779	0.73	2	10.45	6.9	83	4	6	8.7	B	ICSI	2	0	2	2	0	0	0	否	否	全胚冷冻
1377	0	2016120164	段婷婷	＜35	27	1	降调节方案	3	150	≤10天	10	≤3000	1500	HCG	6	1	0	继发不孕	0.561	≤24	19.5	女方因素	3	0.47	427	0.51	3	9.11	6.91	73.4	3	5	7.8	A	IVF	0	0	0	0	0	0	0	是		未受精
2201	1	C00012864	王宝玉	≥35	44	7	刺激方案	1	292.188	＞10天	16	＞3000	4675	HCG	2	3	1	继发不孕	0.11	≤24	23	混合因素	1	16.25	258	0.6	0	17.34	6.96	90.21	4	2	5.1	B		0	0	0	0	0	0	0	是		未取到卵
1146	0	2017070234	王海芳	≥35	46	2	刺激方案	1	165	≤10天	5	≤3000	825	HCG	1	0	0	继发不孕	0.18	＞24	26.4	女方因素	4	3.76	1294	0.57	3	7.61	6.98	70.1	4	7	9.7	A	IVF	1	0	0	0	0	0	0	是		无可移植胚胎
1455	0	2017050085	王海芳	≥35	45	1	刺激方案	1	225	≤10天	8	≤3000	1800	HCG	1	0	0	继发不孕	0.59	＞24	26.4	女方因素	3	1.84	891.83	0.9	3	7.61	6.98	40	4	7	11.8	B	IVF	2	0	1	0	0	0	0	否	否	全胚冷冻
2033	0	C00015422	史建叶	≥35	39	6	刺激方案	1	150	≤10天	8	≤3000	1200	HCG	2	3	0	继发不孕	0.3	≤24	23.3	女方因素	1	20.04	704	1.11	1	14.86	7.07	58.39	4	5	4		IVF	1	0	1	0	0	0	0	否	否	全胚冷冻
1663	1	2017070182	刘玉娥	≥35	47	3	刺激方案	1	375	＞10天	11	＞3000	4125	HCG	2	3	1	继发不孕	0.312	＞24	25.6	混合因素	2	18.82	837	0.67	1	16.48	7.09	71	4	4	7.2	B	ICSI	0	0	0	0	0	0	0	是		未受精
2001	1	2018010185	王芬	＜35	28	2	刺激方案	1	375	≤10天	8	≤3000	3000	HCG	5	0	0	原发不孕	0.361	≤24	21.1	女方因素	2	6.44	484	1.03	1	9.94	7.12	40	3	5	6	C	IVF	0	0	0	0	0	0	0	是		无可移植胚胎
1595	0	C00015608	田美香	≥35	37	2	拮抗剂方案	2	281.25	≤10天	8	≤3000	2250	HCG	3	2	2	继发不孕	1.0	≤24	23.9	女方因素	3	6.7	1003	1.15	4	9	7.13	36	4	7	12.5		IVF	3	0	2	1	2	2	0	否	是	移植	已妊娠	临床妊娠	宫内妊娠	单胎宫内妊娠
1415	1	2016100159	王允花	＜35	29	2	降调节方案	3	300	≤10天	10	≤3000	3000	HCG	4	2	1	继发不孕	1.05	≤24	23.4	女方因素	3	0.66	853	0.8	3	11.29	7.14	32.76	3	7	10.5	A-B	IVF	1	0	1	0	1	1	0	否	是	移植	未妊娠
2138	1	2018010030	张树芹	≥35	47	2	刺激方案	1	300	＞10天	11	＞3000	3300	HCG	4	0	0	原发不孕	0.42	＞24	27.2	混合因素	1	14.17	390	0.71		17.47	7.16	22.8	4	3	8.5	A		0	0	0	0	0	0	0	是		未取卵
1518	1	C00009358	邢秋菊	≥35	39	1	拮抗剂方案	2	356.25	＞10天	12	＞3000	4275	HCG	1	4	1	继发不孕	0.85	≤24	21.1	女方因素	3	7.22	854	0.85	3	5.24	7.22	34.66	4	7	9.6	A	IVF	2	0	2	2	2	2	0	否	是	移植	已妊娠	临床妊娠	宫内妊娠	单胎宫内妊娠
1704	1	C00016552	闫红芹	≥35	46	1	拮抗剂方案	2	300	≤10天	7	≤3000	2100	HCG	1	1	0	继发不孕	0.25	＞24	24.4	女方因素	2	1.16	746	1.03	2	12.05	7.22	39	4	3	9.3	B-C	IVF	0	0	1	0	0	0	0	否	否	全胚冷冻
2230	0	C00017350	闫红芹	≥35	46	2	刺激方案	1	182.143	≤10天	7	≤3000	1275	双扳机	1	1	0	继发不孕	0.51	＞24	24.4	男方因素	1	40.82	166	1.29	1	12.05	7.22	39	4	3	8.8	B	ICSI	1	0	1	0	1	1	0	否	是	移植	未妊娠
2082	0	2017030268	曹春蕾	≥35	44	1	拮抗剂方案	2	250	≤10天	7	≤3000	1750	HCG	3	4	1	继发不孕	0.548	≤24	22.9	混合因素	1	9.7	513	0.41	0	10.53	7.23	106.43	4	3	9	A		0	0	0	0	0	0	0	是		未取到卵
2038	0	C00015891	王玉珍	≥35	46	5	拮抗剂方案	2	182.143	≤10天	7	≤3000	1275	HCG	4	2	1	继发不孕	0.41	＞24	24.1	男方因素	1	13.31	679	0.83	1	19.67	7.26	33	4	6	5.6	B-C	ICSI	1	0	1	0	0	0	0	否	否	全胚冷冻
2055	1	C00011323	王玉珍	≥35	45	1	刺激方案	1	339.286	≤10天	7	≤3000	2375	HCG	3	2	1	继发不孕	0.43	＞24	24.1	女方因素	1	12.39	643	0.67	1	19.67	7.26	33	4	6	0.8	A-B	IVF	1	0	1	1	0	0	0	否	否	全胚冷冻
2241	0	C00011865	王玉珍	≥35	45	3	刺激方案	1	281.25	＞10天	12	＞3000	3375	HCG	3	2	1	继发不孕	0.93	＞24	24.1	女方因素	1	23.73	596	0.59	3	19.67	7.26	33	4	6	4.3	B	IVF	0	0	2	0	0	0	0	否	否	全胚冷冻
665	1	2018060178	王美华	≥35	43	2	刺激方案	1	375	＞10天	14	＞3000	5250	HCG	1	4	1	继发不孕	0.141	＞24	25.7	女方因素	5	1.52	1531	1.8	3	17.93	7.27	69.11	4	4	4.9	B	IVF	3	0	3	1	0	0	0	否	否	全胚冷冻
1846	0	2018030083	王美华	≥35	43	1	刺激方案	1	286.364	＞10天	11	＞3000	3150	HCG	1	4	1	继发不孕	0.3	＞24	25.7	女方因素	2	7.89	439	1.92	2	17.93	7.27	69.11	4	4	6.6	A-B	IVF	1	0	1	0	0	0	0	否	否	全胚冷冻
663	0	C00010700	孙洪芳	≥35	44	1	刺激方案	1	150	≤10天	5	≤3000	750	HCG	6	5	1	继发不孕	0.70	≤24	22.6	女方因素	5	11	1682	1.17	4	14.3	7.33	53	4	7	4.7	B	IVF	2	0	2	0	0	0	0	否	否	全胚冷冻
1953	1	C00016996	孙洪芳	≥35	46	3	刺激方案	1	450	≤10天	9	＞3000	4050	HCG	6	5	1	继发不孕	0.17	≤24	22.6	女方因素	2	10.83	502	0.85	2	14.3	7.33	53	4	7	0.44		IVF	1	0	1	1	0	0	0	否	否	全胚冷冻
1970	0	C00012141	孙洪芳	≥35	45	2	刺激方案	1	234.375	≤10天	8	≤3000	1875	HCG	6	5	1	继发不孕	0.6	≤24	22.6	混合因素	2	10.59	456.45	0.69	1	14.3	7.33	53	4	7	0.53	B-C	ICSI	1	0	1	0	0	0	0	否	否	全胚冷冻
1764	1	C00011667	王宝玉	≥35	44	4	刺激方案	1	375	＞10天	11	＞3000	4125	HCG	2	3	1	继发不孕	0.06	≤24	23	女方因素	2	19.58	607	1.11	2	15.51	7.36	26.7	4	2	0.59	A-B	IVF	0	0	0	0	0	0	0	否	否	全胚冷冻
2102	0	C00011909	王宝玉	≥35	44	5	刺激方案	1	150	≤10天	7	≤3000	1050	HCG	2	3	1	继发不孕	0.548	≤24	23	混合因素	1	12.03	463	1.07	1	15.51	7.36	26.7	4	2			ICSI	1	0	1	0	0	0	0	否	否	全胚冷冻
2127	1	C00010609	王宝玉	≥35	43	3	拮抗剂方案	2	458.333	≤10天	9	＞3000	4125	HCG	1	3	1	继发不孕	0.48	≤24	23	混合因素	1	43.84	420	1.36	0	15.51	7.36	26.7	4	2	9	A		0	0	0	0	0	0	0	是		未取到卵
2164	0	C00012636	王宝玉	≥35	44	6	刺激方案	1	150	≤10天	9	≤3000	1350	HCG	2	3	1	继发不孕	0.917	≤24	23	混合因素	1	16.96	331	0.64	1	15.51	7.36	26.7	4	2	5.5	B	ICSI	1	0	1	1	0	0	0	否	否	全胚冷冻
2273	0	C00009252	王宝玉	≥35	43	1	刺激方案	1	281.25	≤10天	8	≤3000	2250	双扳机	1	3	1	继发不孕	0.42	≤24	23	混合因素	1	7.03	312	0.65	1	15.51	7.36	26.7	4	2			ICSI	0	0	0	0	0	0	0	是		无可移植胚胎
2179	0	2016120217	刘世红	≥35	43	1	刺激方案	1	206.25	≤10天	4	≤3000	825	HCG	3	1	1	继发不孕	0.45	＞24	30.8	女方因素	1	2.87	306	0.09	1	12.41	7.37	43.13	4	6	7	A	IVF	1	0	1	0	1	1	0	否	是	移植	未妊娠
1296	1	2016080165	陈维彦	≥35	47	2	刺激方案	1	350	＞10天	12	＞3000	4200	HCG	1	0	0	继发不孕	0.39	＞24	24.7	女方因素	3	13.83	782	1.88	1	13.56	7.39	13	4	3	11.6	B	IVF	0	0	0	0	0	0	0	是		未受精
1849	1	2016060239	陈维彦	≥35	47	1	刺激方案	1	330	≤10天	10	＞3000	3300	HCG	1	0	0	继发不孕	0.47	＞24	24.7	女方因素	2	0.94	433	0.48	1	13.56	7.39	13	4	3	8.7	B	IVF	1	0	0	0	0	0	0	是		无可移植胚胎
1423	1	2017040104	张利	≥35	40	2	拮抗剂方案	2	333.333	≤10天	9	≤3000	3000	HCG	1	1	1	继发不孕	0.96	≤24	22	混合因素	3	9.57	973	1.39	1	16.56	7.4	56.39	4	5	11.8	B	ICSI	1	0	0	0	0	0	0	是		无可移植胚胎
1869	0	C00013332	陈艳玲	≥35	45	2	拮抗剂方案	2	283.333	≤10天	9	≤3000	2550	HCG	1	1	0	继发不孕	0.41	≤24	23.4	男方因素	2	4.31	353	0.18	2	10.82	7.4	23	4	4	12.1	A-B	ICSI	1	0	2	1	2	2	0	否	是	移植	未妊娠
2051	1	C00015127	陈艳玲	≥35	46	3	拮抗剂方案	2	326.25	≤10天	10	＞3000	3262.5	HCG	1	1	0	继发不孕	0.93	≤24	23.4	男方因素	1	4.13	651	1.44	3	10.82	7.4	23	4	7	11.8	A-B	ICSI	3	0	2	1	2	2	0	否	是	移植	未妊娠
2065	1	C00016709	陈艳玲	≥35	46	4	拮抗剂方案	2	362.5	＞10天	12	＞3000	4350	HCG	2	1	0	继发不孕	0.64	≤24	23.4	男方因素	1	18.5	585	1.2	1	10.82	7.4	23	4	3	10.2	A	ICSI	1	0	1	0	1	2	0	否	是	移植	未妊娠
2251	1	2017030156	张利	≥35	40	1	拮抗剂方案	2	300	≤10天	7	≤3000	2100	双扳机	1	1	1	继发不孕	0.96	≤24	19	混合因素	1	7.92	435	0.69	3	16.56	7.4	56.39	4	5	9.5	B	ICSI	0	0	0	0	0	0	0	是		无可移植胚胎
1732	1	2016030043	李敏	＜35	27	1	刺激方案	1	375	＞10天	11	＞3000	4125	HCG	3	0	0	原发不孕	0.8	≤24	20.7	不明原因	2	3.66	674	0.79	0	19.07	7.43	77.07	3	4	10	A		0	0	0	0	0	0	0	是		未取到卵
2220	1	2016090115	李敏	＜35	28	2	刺激方案	1	310.714	＞10天	14	＞3000	4350	HCG	3	0	0	原发不孕	0.8	≤24	20.7	不明原因	1	7.25	200	2.32	1	19.07	7.43	77.07	3	4	11	B	IVF	0	0	0	0	0	0	0	是		未受精
1606	1	C00013938	崔梅英	≥35	41	1	拮抗剂方案	2	350	≤10天	9	＞3000	3150	HCG	12	4	1	继发不孕	0.60	≤24	22.3	女方因素	2	4.7	993	0.82	2	15.77	7.49	27	4	5	6.1	B	IVF	1	0	1	1	0	0	0	否	否	全胚冷冻
1959	0	C00018394	王艳	≥35	50	1	拮抗剂方案	2	225	≤10天	7	≤3000	1575	HCG	1	4	1	继发不孕	0.494	≤24	21.5	混合因素	2	2.09	490	0.55	2	14.88	7.53	100.56	4	4	9.8	B	ICSI	2	0	1	0	1	1	0	否	是	移植	未妊娠
2113	0	C00016320	汝绪芹	≥35	46	1	刺激方案	1	118.75	＞10天	12	≤3000	1425	HCG	2	4	2	继发不孕	0.548	＞24	27.1	女方因素	1	12.64	450	0.8	1	17.74	7.6	51	4	2	6		IVF	1	0	0	0	0	0	0	是		无可移植胚胎
1773	1	C00009209	刘春红	≥35	42	3	刺激方案	1	300	＞10天	13	＞3000	3900	HCG	5	4	1	继发不孕	0.24	≤24	22.1	混合因素	2	18.62	594	0.5	0	17.41	7.65	58.72	4	5	0.74	B		0	0	0	0	0	0	0	是		未取到卵
2007	0	2017030005	刘世红	≥35	43	2	刺激方案	1	225	≤10天	10	≤3000	2250	HCG	3	1	1	继发不孕	0.65	＞24	30.8	女方因素	1	13.88	930	0.37	3	18.41	7.65	60	4	6	10.4	A	IVF	2	0	1	1	1	1	0	否	是	移植	已妊娠	临床妊娠	宫内妊娠	单胚胎停
2216	0	2016030324	王纪伟	≥35	39	1	刺激方案	1	150	≤10天	7	≤3000	1050	HCG	5	1	0	继发不孕	0.66	≤24	23.8	混合因素	1	22.6	216	0.47	0	18.67	7.67	78.46	4	3	5.2	B		0	0	0	0	0	0	0	是		未取到卵
859	0	2016110259	陈作梅	≥35	43	1	刺激方案	1	288.462	＞10天	13	＞3000	3750	HCG	1	3	1	继发不孕	1.09	＞24	27.5	女方因素	5	1.27	1271	0.26	5	7.26	7.68	34.76	4	9	11	B	IVF	4	0	2	0	0	0	0	否	否	全胚冷冻
1066	1	2017120215	刘业范	≥35	47	1	刺激方案	1	316.667	≤10天	9	≤3000	2850	HCG	1	5	2	继发不孕	0.38	≤24	21.4	女方因素	4	21.35	1607	2.5	2	16.91	7.68	24	4	5	4.9	A	IVF	0	0	0	0	0	0	0	是		未受精
1452	0	2017040019	陈作梅	≥35	44	2	刺激方案	1	225	≤10天	8	≤3000	1800	HCG	1	3	1	继发不孕	0.47	＞24	27.5	女方因素	3	8.49	903	0.41	3	7.26	7.68	45.76	4	5	7.7	A-B	IVF	1	0	1	0	0	0	0	否	否	全胚冷冻
1999	1	C00003563	刘业范	≥35	48	2	刺激方案	1	450	≤10天	8	＞3000	3600	HCG	1	5	2	继发不孕	0.8	≤24	21.4	女方因素	2	2.09	490	0.55	1	16.91	7.68	24	4	5	6	A-B		0	0	0	0	0	0	0	是		未行授精
2175	1	C00008880	夏莉	≥35	43	1	拮抗剂方案	2	375	≤10天	4	≤3000	1500	HCG	1	1	0	继发不孕	0.07	≤24	23	混合因素	1	5.47	313	1.2	1	9.62	7.68	22	4	3	1.02	A-B	ICSI	0	0	1	0	1	1	0	否	是	移植	未妊娠
794	1	2017050268	苑克燕	≥35	41	1	降调节方案	3	300	≤10天	10	≤3000	3000	HCG	13	2	0	继发不孕	0.71	≤24	22.3	男方因素	5	2.67	1666	1.15	4	17.05	7.73	77.07	4	6	7	B-C	ICSI	3	0	3	1	0	0	0	否	否	全胚冷冻
1442	1	2017120163	苑克燕	≥35	41	3	拮抗剂方案	2	375	＞10天	11	＞3000	4125	HCG	13	2	0	继发不孕	0.490	≤24	22.3	男方因素	3	22.38	926	0.76	4	17.05	7.73	77.07	4	6	7.8	B	ICSI	4	0	3	1	0	0	0	否	否	全胚冷冻
1483	1	C00017408	刘霞	≥35	43	1	刺激方案	1	300	≤10天	7	≤3000	2100	HCG	9	2	1	继发不孕	0.19	≤24	22.6	女方因素	3	14.05	854	1.42	0	12.91	7.74	46.98	4	5	6.1	A-B		0	0	0	0	0	0	0	是		未取到卵
1910	1	C00018645	刘霞	≥35	43	2	刺激方案	1	300	≤10天	8	≤3000	2400	HCG	9	2	1	继发不孕	0.7	≤24	22.6	女方因素	2	20.34	503.17	2.35	0	12.91	7.74	45.98	4	7	6.5	A-B		0	0	0	0	0	0	0	是		未取到卵
1567	1	C00017282	张连梅	≥35	46	1	拮抗剂方案	2	310.417	＞10天	12	＞3000	3725	HCG	6	2	1	继发不孕	0.84	＞24	26.7	女方因素	3	1.66	1095	0.41	4	6.91	7.76	36	4	9	9.7	B	IVF	2	0	2	0	0	0	0	否	否	全胚冷冻
2059	1	C00008018	李晓	＜35	30	3	刺激方案	1	300	≤10天	5	≤3000	1500	HCG	4	3	0	继发不孕	0.87	≤24	22.2	混合因素	1	26.96	615	1.16	1	16.59	7.78	21	3	3	5.4	B	ICSI	1	0	1	0	0	0	0	否	否	全胚冷冻
1104	0	2018060151	伏广华	≥35	48	2	刺激方案	1	183.333	≤10天	9	≤3000	1650	HCG	3	3	1	继发不孕	0.53	≤24	21.6	女方因素	4	21.1	1422	1.23	3	18.2	7.79	90	4	4	6.5	B	IVF	1	0	1	0	0	0	0	否	否	全胚冷冻
1323	0	2017090008	张丽	≥35	45	2	刺激方案	1	253.125	≤10天	8	≤3000	2025	HCG	1	0	0	继发不孕	0.119	＞24	24.3	女方因素	3	4.42	675	1.42	2	13.37	7.8	51	4	4	18.5	A	IVF	2	0	1	1	0	0	0	否	否	全胚冷冻
2204	1	2017030122	张丽	≥35	44	1	刺激方案	1	295.312	＞10天	16	＞3000	4725	HCG	1	0	0	继发不孕	0.31	＞24	24.3	女方因素	1	2.29	251	1.5	1	13.37	7.8	51	4	4	16.5	A-B	IVF	1	0	1	0	0	0	0	否	否	全胚冷冻
1857	0	2018040017	夏香	≥35	47	1	刺激方案	1	225	≤10天	10	≤3000	2250	HCG	8	2	1	继发不孕	0.42	≤24	19.8	男方因素	2	34.02	393	0.67	0	7.89	7.85	92	4	2	4.3	B		0	0	0	0	0	0	0	是		未取到卵
1630	0	C00011981	齐妍飞	≥35	36	1	拮抗剂方案	2	217.5	≤10天	10	≤3000	2175	HCG	6	1	1	继发不孕	0.31	＞24	27	女方因素	2	11.14	912	0.44	2	13.59	7.88	46	4	6	0.99	A	IVF	1	0	2	1	2	2	0	否	是	移植	未妊娠
2100	1	C00018816	余向前	≥35	45	1	拮抗剂方案	2	333.333	≤10天	9	≤3000	3000	双扳机	1	2	0	继发不孕	0.736	＞24	26.8	男方因素	1	12.88	465.78	0.82	2	11.07	7.92	50.71	4	6	8.2	A-B	ICSI	1	0	0	0	1	1	0	否	是	移植	未妊娠
1826	0	C00018955	楚晓莉	≥35	42	1	拮抗剂方案	2	175	≤10天	9	≤3000	1575	HCG	2	5	1	继发不孕	0.3	＞24	24.6	混合因素	2	11.99	499.54	0.69	1	18.87	7.94	27.93	4	4	12.8	A	ICSI	0	0	0	0	0	0	0	是		无可移植胚胎
1987	0	2017020079	邢爱景	≥35	48	4	刺激方案	1	150	≤10天	8	≤3000	1200	HCG	1	0	0	继发不孕	0.33	≤24	22.8	女方因素	2	5.73	406	0.73	1	16.93	7.95	75	4	2	5.2	A	IVF	0	0	0	0	0	0	0	是		未受精
1736	1	2017060002	邓素珍	≥35	41	2	拮抗剂方案	2	337.5	≤10天	6	≤3000	2025	HCG	3	3	1	继发不孕	0.66	≤24	19.5	男方因素	2	7.91	666	2.01	3	16.98	7.97	71	4	4	6.6	A	ICSI	3	0	2	0	2	2	0	否	是	移植	未妊娠
2268	0	2017100199	邓素珍	≥35	42	1	降调节方案	3	180	≤10天	5	≤3000	900	HCG	3	3	1	继发不孕	0.65	≤24	19.5	混合因素	1	4.82	321	0.36	0	16.98	7.97	71	4	3				0	0	0	0	0	0	0	是		未取到卵
1955	1	C00003944	张春霞	≥35	46	2	刺激方案	1	306.818	＞10天	11	＞3000	3375	HCG	1	2	1	继发不孕	0.39	≤24	20.9	男方因素	2	12.52	497	1.4	3	10.2	8.09	25.42	4	8	7	B	ICSI	0	0	0	0	0	0	0	是		无可移植胚胎
1380	1	2017090005	周俊平	＜35	34	3	刺激方案	1	300	＞10天	15	＞3000	4500	HCG	10	0	0	原发不孕	0.58	＞24	25.7	女方因素	3	1.55	630	1.34	3	16.18	8.18	86.73	3	5	11.2	B	IVF	2	0	2	0	1	1	0	否	是	移植	已妊娠	临床妊娠	宫内妊娠	单胚胎停
1899	0	2016070102	周俊平	＜35	33	1	降调节方案	3	180	＞10天	15	≤3000	2700	HCG	10	0	0	原发不孕	0.58	＞24	25.7	女方因素	2	3.41	525	2.05	2	16.18	8.18	86.73	3	5	13.9	B	IVF	2	0	2	1	0	0	0	否	否	全胚冷冻
1979	1	C00004653	李莉萍	≥35	35	4	拮抗剂方案	2	325	≤10天	9	≤3000	2925	HCG	4	2	1	继发不孕	0.3	≤24	19.2	男方因素	2	10.66	422	0.66	3	9.9	8.22	93	4	4	4.4	单层	ICSI	3	0	1	1	0	0	0	否	否	全胚冷冻
1037	1	C00003364	王梅	≥35	45	2	拮抗剂方案	2	500	≤10天	8	＞3000	4000	HCG	2	3	1	继发不孕	0.20	≤24	22.5	混合因素	4	6.99	1121	1.25	3	14.28	8.33	89	4	5	16	A	ICSI	2	0	1	0	0	0	0	否	否	全胚冷冻
2068	1	C00003978	王梅	≥35	45	5	刺激方案	1	458.333	≤10天	9	＞3000	4125	HCG	2	3	1	继发不孕	0.56	≤24	22.5	混合因素	1	11.03	570	0.46	0	21.28	8.33	80	4	3	7.5	A-B		0	0	0	0	0	0	0	是		未取到卵
1837	0	2016080077	王怀娜	＜35	26	5	拮抗剂方案	2	150	≤10天	5	≤3000	750	HCG	2	0	0	原发不孕	1.36	＞24	25.3	男方因素	2	4.66	470	1.22	2	14.5	8.39	64.78	3	4	13	B	ICSI	1	0	2	0	2	2	0	否	是	移植	未妊娠
2140	0	2016070147	王怀娜	＜35	26	4	刺激方案	1	150	≤10天	9	≤3000	1350	HCG	2	0	0	原发不孕	0.53	＞24	25.3	男方因素	1	10.08	386	1.65	1	14.5	8.39	64.78	3	4	10	B	ICSI	1	0	1	0	0	0	0	否	否	全胚冷冻
2149	0	2016010163	王怀娜	＜35	26	3	刺激方案	1	150	≤10天	6	≤3000	900	HCG	2	0	0	原发不孕	0.81	＞24	25.3	男方因素	1	3	374	1.07	3	14.5	8.39	64.78	3	4	12	A	ICSI	2	0	1	1	1	1	0	否	是	移植	未妊娠
2221	0	C00004169	殷学红	≥35	44	1	刺激方案	1	247.5	≤10天	10	≤3000	2475	双扳机	2	4	2	继发不孕	0.620	≤24	21.1	女方因素	1	24.02	197	1.05		16.47	8.41	36	4	3	8.9	B		0	0	0	0	0	0	0	是		未取卵
2003	1	2016070198	牛新荣	≥35	40	1	降调节方案	3	390	＞10天	15	＞3000	5850	HCG	4	2	1	继发不孕	0.275	≤24	21.2	混合因素	1	10.38	961	1.75	2	15.25	8.42	10	4	4	14	A-B	ICSI	4	0	4	2	0	0	0	否	否	全胚冷冻
1588	0	2018010156	李翠玲	≥35	51	1	刺激方案	1	259.091	＞10天	11	≤3000	2850	HCG	2	3	1	原发不孕	0.66	＞24	24.2	女方因素	3	15.22	1032	2.24	2	13.65	8.45	29.6	4	2	7.2	A	IVF	1	0	1	0	0	0	0	否	否	全胚冷冻
2219	0	C00007291	王翠连	≥35	43	2	拮抗剂方案	2	160.714	≤10天	7	≤3000	1125	双扳机	2	3	1	继发不孕	0.08	＞24	24.7	混合因素	1	3.26	206	0.15	1	18.54	8.51	57	4	2	7.8	B	ICSI	1	0	1	0	1	1	0	否	是	移植	已妊娠	临床妊娠	宫内妊娠	单胚胎停
818	1	C00014572	张静	≥35	42	1	拮抗剂方案	2	300	≤10天	8	≤3000	2400	HCG	1	6	1	继发不孕	0.5	＞24	24.2	女方因素	5	3.64	1505	0.67	3	19.38	8.55	14.73	4	7	7.4	A-B	IVF	3	0	2	0	2	2	0	否	是	移植	未妊娠
34	0	2017030076	朱艳苓	≥35	38	2	降调节方案	3	225	＞10天	12	≤3000	2700	HCG	12	4	1	继发不孕	0.35	≤24	18	女方因素	9	2.59	1479	0.89	5	10.99	8.56	77.07	4	7	13	A	IVF	4	0	2	0	2	2	0	否	是	移植	未妊娠
367	1	2017060139	朱艳苓	≥35	38	3	刺激方案	1	293.75	＞10天	12	＞3000	3525	HCG	12	4	1	继发不孕	1.01	≤24	18	女方因素	7	20.52	1739	2.09	7	10.99	8.56	77.07	4	7	5.1	B	IVF	5	0	1	0	0	0	0	否	否	全胚冷冻
1693	1	2016060247	张汝燕	＜35	32	1	刺激方案	1	393.75	≤10天	4	≤3000	1575	HCG	8	0	0	原发不孕	1.03	≤24	17.7	女方因素	2	1.36	767	0.7	2	7.43	8.68	37	3	10	11.5	B	IVF	2	0	1	0	0	0	0	否	否	全胚冷冻
475	1	2017020036	罗锦旻	≥35	41	2	降调节方案	3	458.333	≤10天	9	＞3000	4125	HCG	2	1	0	继发不孕	1.17	≤24	17.2	混合因素	6	1.46	1778	1.64	5	6.62	8.7	40.37	4	6	12	A	ICSI	3	0	0	0	0	0	0	是		无可移植胚胎
1946	1	2017050122	牛振红	≥35	43	1	刺激方案	1	342.857	＞10天	14	＞3000	4800	HCG	3	2	1	继发不孕	0.2	≤24	20.6	混合因素	2	16.58	378	1.21	0	16.62	8.7	40.37	4	4	6.5	B		0	0	0	0	0	0	0	是		未取到卵
1274	0	2016030348	张佳	＜35	34	1	降调节方案	3	220.312	＞10天	16	＞3000	3525	HCG		3	1	原发不孕	0.51	≤24	21.4	女方因素	3	19.51	858	1.7	2	10.69	8.71	54.8	3	5	5.7	A	IVF	1	0	0	0	0	0	0	是		无可移植胚胎
277	0	2017090231	王颖	≥35	44	2	降调节方案	3	272.727	＞10天	11	≤3000	3000	HCG	1	3	1	继发不孕	0.7	＞24	24.9	混合因素	7	0.77	2128	1.32	7	8.16	8.76	43.77	4	9	11.4	A	ICSI	4	0	2	1	0	0	0	否	否	全胚冷冻
1265	0	C00012706	陈艳玲	≥35	45	1	拮抗剂方案	2	285	≤10天	10	≤3000	2850	HCG	1	1	0	继发不孕	0.917	≤24	23.4	男方因素	3	2.4	882	0.04	4	15.54	8.86	29	4	7	12.6	A-B	ICSI	3	0	1	0	0	0	0	否	否	全胚冷冻
1881	1	2017120089	李吉花	≥35	43	1	刺激方案	1	360	≤10天	10	＞3000	3600	HCG	1	1	1	继发不孕	0.45	≤24	20.4	女方因素	2	11.2	257	0.73	5	18.27	8.98	79.56	4	7	5.5	B	IVF	4	0	2	0	0	0	0	否	否	全胚冷冻
2190	1	2018060209	李吉花	≥35	44	2	刺激方案	1	440.625	≤10天	8	＞3000	3525	HCG	1	1	1	继发不孕	0.75	≤24	20.4	女方因素	1	6.3	581	1.04	3	16.27	8.98	78.34	4	7	8.6		IVF	3	0	2	0	0	0	0	否	否	全胚冷冻
1960	1	C00009906	张华	≥35	44	3	刺激方案	1	450	≤10天	9	＞3000	4050	HCG	19	0	0	原发不孕	0.49	＞24	27.9	混合因素	2	11.24	486	0.49	0	12.55	9.04	52.7	4	4	0.65	B-C		0	0	0	0	0	0	0	是		未取到卵
2080	1	C00014611	张华	≥35	45	7	刺激方案	1	300	＞10天	12	＞3000	3600	HCG	20	0	0	原发不孕	0.18	＞24	27.9	混合因素	1	12.38	518	1.04	0	12.55	9.04	52.7	4	4	0.42	B-C		0	0	0	0	0	0	0	是		未取到卵
1395	1	2017050045	颜利君	≥35	40	3	刺激方案	1	375	≤10天	10	＞3000	3750	HCG	2	3	2	继发不孕	0.56	≤24	22.8	女方因素	3	6.05	895	1.27	3	8.4	9.14	106.43	4	6	11.5	B	IVF	2	0	2	0	2	2	0	否	是	移植	未妊娠
1673	1	2016110198	颜利君	≥35	40	2	刺激方案	1	375	＞10天	11	＞3000	4125	HCG	2	3	2	继发不孕	0.74	≤24	22.8	女方因素	2	1.25	821	0.95	2	8.4	9.14	86.43	4	6	8	B	IVF	2	0	1	0	0	0	0	否	否	全胚冷冻
2025	1	2016090101	颜利君	≥35	39	1	刺激方案	1	290.625	≤10天	8	≤3000	2325	HCG	2	3	2	继发不孕	1.070	≤24	22.8	女方因素	1	8.29	734	0.93	1	8.4	9.14	36.43	4	6	8.5	B	IVF	1	0	1	0	0	0	0	否	否	全胚冷冻
2032	1	2016100139	蒋艳	≥35	45	1	降调节方案	3	450	≤10天	9	＞3000	4050	HCG	6	3	1	继发不孕	0.61	≤24	20.9	混合因素	1	15.41	707	0.77	0	18.85	9.24	50.1	4	3	8.5	A-B		0	0	0	0	0	0	0	是		未取到卵
2232	0	C00004486	王美蓉	≥35	39	1	拮抗剂方案	2	167.647	＞10天	17	≤3000	2850	HCG	3	0	0	原发不孕	0.66	≤24	23.4	女方因素	1	43.03	156	1.2	0	18.02	9.25	56	4	2	10.1	A		0	0	0	0	0	0	0	是		未取到卵
1522	1	C00006675	孙秋双	≥35	36	1	刺激方案	1	316.667	≤10天	9	≤3000	2850	HCG	10	2	0	继发不孕	0.25	≤24	19.9	女方因素	3	18.73	823	0.64	2	12.09	9.26	10	4	4	6.5	A	IVF	1	0	0	0	0	0	0	是		无可移植胚胎
2044	1	C00004640	侯令肖	＜35	31	1	刺激方案	1	325	≤10天	7	≤3000	2275	HCG	3	0	0	原发不孕	0.712	＞24	30.3	混合因素	1	12.94	660	0.96	0	16.63	9.32	14	3	2	10.2	B		0	0	0	0	0	0	0	是		未取到卵
2049	0	2017120015	崔秀珍	≥35	38	1	拮抗剂方案	2	280	＞10天	15	＞3000	4200	双扳机	2	1	0	继发不孕	0.89	≤24	23.6	混合因素	1	5.41	654	0.76	2	12.75	9.33	39.46	4	6	8.4	A	ICSI	0	0	0	0	0	0	0	是		无可移植胚胎
2207	0	C00006266	韩利君	≥35	36	2	刺激方案	1	231.818	＞10天	11	≤3000	2550	HCG	2	5	0	继发不孕	0.77	＞24	28.5	男方因素	1	32.41	245	0.4	0	15.34	9.37	50.34	4	3	7.4	B-C		0	0	0	0	0	0	0	是		未取到卵
2115	1	2018050060	刘金彩	≥35	38	1	刺激方案	1	300	≤10天	10	≤3000	3000	HCG	3	2	1	继发不孕	0.3	≤24	20.2	女方因素	1	26.94	447	0.6	0	18.38	9.5	79	4	3	8.6	A		0	0	0	0	0	0	0	是		未取到卵
1162	1	2017090169	卜凡燕	≥35	40	3	刺激方案	1	300	＞10天	11	＞3000	3300	HCG	7	2	1	继发不孕	0.14	＞24	26.6	男方因素	4	5.88	1212	0.69	3	16.42	9.74	40	4	4	12.5	A	ICSI	1	0	0	0	0	0	0	是		无可移植胚胎
1744	1	2016110074	卜凡燕	≥35	39	1	刺激方案	1	300	≤10天	8	≤3000	2400	HCG	7	2	1	继发不孕	0.19	＞24	26.6	女方因素	2	9.65	640	0.78	2	17.42	9.74	40	4	4	10	A	IVF	2	0	2	1	0	0	0	否	否	全胚冷冻
1990	1	2018010132	生兆英	≥35	48	3	拮抗剂方案	2	332.143	≤10天	7	≤3000	2325	HCG	1	4	1	继发不孕	0.27	≤24	21.6	女方因素	2	19.53	401	0.8		17.15	9.78	79.67	4	3	12.9	B		0	0	0	0	0	0	0	是		未取卵
2079	0	2017100240	生兆英	≥35	47	2	拮抗剂方案	2	243.182	＞10天	11	≤3000	2675	HCG	1	4	1	继发不孕	0.13	≤24	21.6	女方因素	1	14.27	521	2.3		17.15	9.78	79.67	4	3	12	A-B		0	0	0	0	0	0	0	是		未取卵
2249	0	2018040284	生兆英	≥35	48	5	刺激方案	1	150	≤10天	4	≤3000	600	HCG	1	4	1	继发不孕	0.76	≤24	21.6	男方因素	1	12.03	463	0.52	1	17.15	9.78	79.67	4	3	8.4	A	ICSI	0	0	0	0	0	0	0	是		无可移植胚胎
1737	1	C00009247	巩丽娟	≥35	43	1	拮抗剂方案	2	480	≤10天	10	＞3000	4800	HCG	3	3	1	原发不孕	0.22	≤24	18.4	混合因素	2	9.83	663	0.56	0	11.96	9.83	63	4	4	7.9	A		0	0	0	0	0	0	0	是		未取到卵
848	1	2017060033	陈雪唤	≥35	35	2	刺激方案	1	305.769	＞10天	13	＞3000	3975	HCG	5	1	1	继发不孕	0.5	≤24	22.4	女方因素	5	5.75	1332	1.34	4	9.81	9.85	53	4	6	8.8	A	IVF	3	0	2	0	2	2	0	否	是	移植	未妊娠
1685	1	C00009328	张美玲	≥35	46	2	降调节方案	3	400	≤10天	9	＞3000	3600	HCG	2	6	1	继发不孕	0.17	≤24	23.9	男方因素	2	14.63	785	0.8	2	17.21	9.89	87.35	4	5	0.54	A	ICSI	2	0	1	0	0	0	0	否	否	全胚冷冻
1402	0	C00003648	田明秀	≥35	46	7	刺激方案	1	225	≤10天	5	≤3000	1125	HCG	4	2	1	继发不孕	0.51	≤24	22.8	男方因素	3	17.03	882	0.96	2	17.73	9.91	56.89	4	3	0.74	B-C	ICSI	2	0	1	0	0	0	0	否	否	全胚冷冻
1511	1	C00008139	张美玲	≥35	46	1	拮抗剂方案	2	375	≤10天	9	＞3000	3375	HCG	2	6	1	继发不孕	0.17	≤24	23.9	女方因素	3	12.05	885	0.63	2	17.12	9.91	53	4	5	0.64	A-B	IVF	1	0	0	0	0	0	0	是		无可移植胚胎
1916	1	2017080205	田明秀	≥35	44	1	拮抗剂方案	2	325	≤10天	10	＞3000	3250	HCG	2	2	1	继发不孕	0.09	≤24	22.8	混合因素	2	14.87	490	0.55	0	17.73	9.91	56.89	4	3	10.1	A		0	0	0	0	0	0	0	是		未取到卵
2035	1	C00004859	田明秀	≥35	46	8	拮抗剂方案	2	325	≤10天	5	≤3000	1625	HCG	4	2	1	继发不孕	0.76	≤24	22.8	女方因素	1	10.12	287	0.46	1	17.73	9.91	68	4	3	7.9	A		0	0	0	0	0	0	0	是		未行授精
2243	1	2018050076	田明秀	≥35	45	7	拮抗剂方案	2	435	＞10天	15	＞3000	6525	HCG	2	2	1	继发不孕	0.93	≤24	22.8	女方因素	1	17.97	340	1.07	0	17.73	9.91	56.89	4	3	5.1	B		0	0	0	0	0	0	0	是		未取到卵
1013	1	C00011707	胡建琳	≥35	44	2	刺激方案	1	300	＞10天	11	＞3000	3300	HCG	1	6	2	继发不孕	0.96	≤24	20.7	女方因素	4	20.17	1221	1.04	5	7.7	9.92	38.33	4	9	0.68	B-C	IVF	3	0	2	1	0	0	0	否	否	全胚冷冻
1546	0	C00009604	于静	≥35	38	5	拮抗剂方案	2	150	＞10天	11	≤3000	1650	HCG	5	0	0	原发不孕	1.12	≤24	23.6	男方因素	3	6.61	1169	0.71	3	16.37	9.92	54.67	4	6	1.2	A	ICSI	2	0	0	0	0	0	0	是		无可移植胚胎
1620	1	C00011311	臧传兰	≥35	47	3	刺激方案	1	300	＞10天	12	＞3000	3600	HCG	3	3	1	继发不孕	0.13	＞24	25	混合因素	2	24.6	948	1.2	0	19.2	10.88	56.89	4	3	0.58	B		0	0	0	0	0	0	0	是		未取到卵
1815	1	2018060271	艾贻云	≥35	46	1	刺激方案	1	306.818	＞10天	11	＞3000	3375	HCG	3	4	3	继发不孕	0.74	≤24	21.6	女方因素	2	7.05	517	1.18	1	18.81	11.76	55.05	4	3	4.8		IVF	0	0	0	0	0	0	0	是		无可移植胚胎
[truncated: 6 more columns]
