# Supplementary material for: More exogenous Gn starting doses are not beneficial for poor ovarian responders in POSEIDON groups: a propensity score matching retrospective cohort study
Source: Research Square preprint supplement (doi:10.21203/rs.3.rs-6441527/v1), 2025-08-06
Supplement: Supplementary file 3 [file bfe0c0fed6ad7fd14d6a782a.xlsx]

## Sheet: IVF-ICSI
ID	分组	病历号	姓名	年龄分组	年龄	第几取卵	COS方案	COH分组	每日Gn	Gn天数分组	Gn天数	Gn总量分组	Gn总量	扳机	不孕年限	孕次	产次	不孕类型	AMH	BMI分组	体重指数	诊断	扳机日卵泡数	扳机日LH	扳机日E2	扳机日P	获卵数	基础FSH	基础LH	基础E2	波塞冬分组	AFC	扳机日内膜厚度	扳机日内膜形态	实验室授精方式	正常受精卵子总数	有效囊胚	有效胚胎	优质胚胎	新鲜移植胚胎总数	D234移植个数	D567移植个数	周期取消	鲜胚移植	周期结局	妊娠结果	临床妊娠	妊娠类型	妊娠诊断
219	1	C00010294	赵珍	≥35	37	1	降调节方案	3	418.75	＞10天	12	＞3000	5025	HCG	5	3	1	继发不孕	2.07	≤24	21.6	女方因素	8	0.63	1634	1.38	9	8.41	2.03	25	2	15	0.88	A	IVF	5	2	4	0	0	0	0	否	否	全胚冷冻
474	0	C00011819	冯明明	≥35	35	1	降调节方案	3	229.545	＞10天	11	≤3000	2525	HCG	1	1	1	继发不孕	1.99	≤24	22.2	混合因素	6	1.77	1791	1.02	7	5.07	2.03	24.27	2	12	15	A	ICSI	3	0	2	2	2	2	0	否	是	移植	已妊娠	临床妊娠	宫内妊娠	双胎宫内妊娠
923	1	2017120180	薛广华	≥35	38	2	刺激方案	1	300	＞10天	15	＞3000	4500	HCG	3	2	0	继发不孕	0.65	＞24	28	不明原因	4	1.77	890	0.58	4	8.15	2.04	34.56	4	5	13	B	IVF	2	0	1	0	0	0	0	否	否	全胚冷冻
1016	1	C00017862	王艳玲	≥35	45	1	拮抗剂方案	2	300	＞10天	11	＞3000	3300	HCG	1	3	1	继发不孕	0.55	≤24	17.1	女方因素	4	5.79	1205	1.05	6	3.24	2.04	91.75	4	9	10.8	A-B	IVF	4	0	2	0	2	2	0	否	是	移植	未妊娠
1158	1	C00019166	王艳玲	≥35	45	4	拮抗剂方案	2	300	≤10天	6	≤3000	1800	HCG	1	3	0	继发不孕	0.12	≤24	17.1	女方因素	4	2.4	1232.93	0.76	4	3.24	2.04	41.75	4	7	7.2	B	IVF	3	0	0	0	0	0	0	是		无可移植胚胎
1293	0	2017020212	孙丰荣	≥35	43	6	刺激方案	1	172.5	≤10天	10	≤3000	1725	HCG	2	6	1	继发不孕	0.9	＞24	26.8	女方因素	3	8.71	793	1.68	3	5.2	2.04	36	4	5	8.1	A-B	IVF	2	0	2	1	0	0	0	否	否	全胚冷冻
1362	1	2018010171	薛广华	≥35	38	3	刺激方案	1	300	≤10天	6	≤3000	1800	HCG	3	2	0	继发不孕	0.45	＞24	28	不明原因	3	2.25	544	0.43	3	8.15	2.04	34.56	4	5	11.7	B	IVF	3	0	2	1	2	2	0	否	是	移植	已妊娠	临床妊娠	宫内妊娠	单胎宫内妊娠
2101	0	C00019730	王艳玲	≥35	46	5	拮抗剂方案	2	150	≤10天	7	≤3000	1050	HCG	1	3	0	继发不孕	0.49	≤24	17.1	女方因素	1	5.11	463.5	0.39	1	3.24	2.04	31.75	4	3	8.8	A	IVF	1	0	1	1	1	2	0	否	是	移植	未妊娠
2108	0	C00019081	王艳玲	≥35	45	3	刺激方案	1	150	≤10天	6	≤3000	900	双扳机	1	3	0	继发不孕	0.221	≤24	17.1	女方因素	1	10.82	454.42	0.86	2	3.24	2.04	41.75	4	5	5.3	B	IVF	1	0	1	0	0	0	0	否	否	全胚冷冻
832	0	C00018719	时春梅	≥35	41	1	拮抗剂方案	2	225	≤10天	8	≤3000	1800	HCG	1	3	2	继发不孕	1.81	≤24	22.6	女方因素	5	10.38	1426.56	1	3	8.73	2.06	46.2	2	9	11.7	B	IVF	1	0	1	1	1	1	0	否	是	移植	未妊娠
412	0	2017080239	王海晶	＜35	27	1	降调节方案	3	225	＞10天	11	≤3000	2475	HCG	2	0	0	原发不孕	3.4	＞24	24.8	女方因素	8	1.15	1360	0.63	7	7.89	2.07	50	1	14	11.8	A	IVF	7	0	6	2	2	2	0	否	是	移植	已妊娠	临床妊娠	宫内妊娠	单胎宫内妊娠
1505	1	C00018991	蔡燕	≥35	43	1	拮抗剂方案	2	450	≤10天	9	＞3000	4050	HCG	4	1	1	继发不孕	0.22	≤24	20.2	女方因素	3	2.64	934	0.5	3	12.49	2.07	52.55	4	8	10	A	IVF	1	0	1	0	1	1	0	否	是	移植	未妊娠
2167	1	C00004335	刘晓莉	≥35	46	1	拮抗剂方案	2	290.625	≤10天	8	≤3000	2325	双扳机	1	7	1	继发不孕	0.11	≤24	20.3	女方因素	1	7.57	326	0.68	1	9.38	2.07	102	4	3	5.7	A	IVF	0	0	0	0	0	0	0	是		无可移植胚胎
2168	0	C00009676	付树清	≥35	49	1	刺激方案	1	225	≤10天	5	≤3000	1125	HCG	7	4	0	继发不孕	0.52	＞24	27.9	混合因素	1	6.2	324	0.11	1	13.6	2.07	10	4	2	0.52	B	ICSI	1	0	1	0	0	0	0	否	否	全胚冷冻
321	1	2016100074	卜淑娟	≥35	36	6	刺激方案	1	300	≤10天	9	≤3000	2700	HCG	5	3	0	继发不孕	2.42	≤24	16.4	女方因素	7	0.97	2162	1.37	8	7.38	2.08	40.21	2	9	10.2		IVF	4	0	2	1	0	0	0	否	否	全胚冷冻
578	0	2017080004	卜淑娟	≥35	37	7	拮抗剂方案	2	279.545	＞10天	11	＞3000	3075	HCG	7	3	0	继发不孕	2.28	≤24	16.4	女方因素	6	1.3	1648	2.19	3	7.38	2.08	33.77	2	8	11.5	A	IVF	3	0	0	0	0	0	0	是		无可移植胚胎
737	0	2016060225	卜淑娟	≥35	36	5	刺激方案	1	281.25	≤10天	8	≤3000	2250	HCG	5	3	0	继发不孕	1.3	≤24	16.4	女方因素	5	2.01	1461	1.73	4	7.38	2.08	81.1	2	8	11.9	A	IVF	4	0	2	0	2	2	0	否	是	移植	未妊娠
1708	0	C00004467	卜淑娟	≥35	38	8	拮抗剂方案	2	281.25	≤10天	8	≤3000	2250	双扳机	1	4	0	继发不孕	0.49	≤24	16.4	男方因素	2	3.96	736	1.41	2	7.38	2.08	52	4	6	8.9	A	IVF	1	0	1	0	0	0	0	否	否	全胚冷冻
712	1	2017090266	李珊珊	＜35	28	1	降调节方案	3	294.318	＞10天	11	＞3000	3237.5	HCG	10	0	0	原发不孕	0.89	＞24	26	女方因素	5	3.31	1624	0.94	4	6.81	2.09	22	3	6	16	A-B	IVF	1	0	1	0	1	1	0	否	是	移植	未妊娠
168	1	2018050081	徐先菊	≥35	40	1	降调节方案	3	409.091	＞10天	11	＞3000	4500	HCG	2	1	1	继发不孕	0.567	≤24	19.3	女方因素	6	0.62	1268	1.1	5	7.26	2.1	46.43	4	7	11.8	A	IVF	5	0	5	4	2	2	0	否	是	移植	未妊娠
210	1	2017060207	张延云	＜35	31	1	降调节方案	3	316.071	＞10天	14	＞3000	4425	HCG	3	2	1	继发不孕	4.5	＞24	25	女方因素	8	1.37	1808	0.34	8	4.74	2.1	39	1	11	14	A	IVF	3	0	2	1	2	2	0	否	是	移植	已妊娠	临床妊娠	宫内妊娠	单胚胎停
1017	1	C00007557	张琳	≥35	36	1	降调节方案	3	292.5	≤10天	10	≤3000	2925	HCG	4	2	0	继发不孕	1.55	＞24	25.7	女方因素	4	1.27	1202	1.24	8	11.32	2.1	69	2	12	0.83	A-B	IVF	3	1	4	1	2	2	0	否	是	移植	未妊娠
1079	0	C00015570	李林	≥35	36	2	拮抗剂方案	2	225	≤10天	9	≤3000	2025	HCG	1	1	0	继发不孕	2.27	≤24	22.6	女方因素	4	2.05	1556	0.48	4	5.64	2.11	21	2	9	1.08	A	IVF	0	1	1	0	0	0	0	否	否	全胚冷冻
1388	1	C00011770	李林	≥35	35	1	刺激方案	1	400	≤10天	7	≤3000	2800	HCG	1	0	0	原发不孕	1.33	≤24	22.6	女方因素	3	6.14	907	0.76	5	5.64	2.11	21	2	11	0.6	B	IVF	1	0	2	0	0	0	0	否	否	全胚冷冻
1817	0	C00012838	董苹	＜35	29	1	拮抗剂方案	2	281.25	≤10天	8	≤3000	2250	HCG	1	1	1	继发不孕	1.15	≤24	19.1	女方因素	2	0.59	512	0.29	2	15.25	2.11	17	3	4	13	A-B	IVF	1	0	1	0	0	0	0	否	否	全胚冷冻
1370	0	2018010087	魏洁	≥35	35	1	刺激方案	1	278.571	≤10天	7	≤3000	1950	HCG	10	0	0	原发不孕	2.55	＞24	24.6	女方因素	3	6.65	491	0.3	1	5.14	2.12	31.75	2	8	7.8	B	IVF	1	0	1	0	0	0	0	否	否	全胚冷冻
1862	1	2018010175	侯艳荣	≥35	42	2	刺激方案	1	300	≤10天	5	≤3000	1500	HCG	3	2	1	继发不孕	0.62	≤24	23.4	混合因素	2	20.7	373	2.25	0	6.88	2.13	39.5	4	4	7.6	A-B		0	0	0	0	0	0	0	是		未取到卵
1917	0	2017110193	侯艳荣	≥35	42	1	刺激方案	1	225	≤10天	8	≤3000	1800	HCG	3	2	1	继发不孕	0.137	≤24	23.4	混合因素	2	10.55	490	0.31	1	6.88	2.13	40	4	4	5.4	C	ICSI	0	0	0	0	0	0	0	是		无可移植胚胎
464	0	2017070082	李祥敏	≥35	38	4	降调节方案	3	283.333	≤10天	9	≤3000	2550	HCG	2	2	1	继发不孕	1.51	≤24	20.2	女方因素	6	12	1855	1.6	6	5.04	2.14	59.09	2	9	6	B	IVF	3	0	2	0	0	0	0	否	否	全胚冷冻
708	0	2016090130	李祥敏	≥35	37	2	刺激方案	1	283.333	≤10天	9	≤3000	2550	HCG	1	1	1	继发不孕	1.25	≤24	20.2	女方因素	5	12.44	1646.47	2.1	3	5.04	2.14	59.09	2	9	5	B	IVF	2	0	1	0	0	0	0	否	否	全胚冷冻
981	1	2016050085	李祥敏	≥35	37	1	降调节方案	3	381.25	＞10天	12	＞3000	4575	HCG	1	1	1	继发不孕	2.44	≤24	20.2	女方因素	4	1.7	1350	1.23	2	5.04	2.14	39.09	2	10	9.4	B	IVF	2	0	2	0	2	2	0	否	是	移植	未妊娠
1114	0	2016100053	李祥敏	≥35	37	3	刺激方案	1	278.571	＞10天	14	＞3000	3900	HCG	1	1	1	继发不孕	2.26	≤24	20.2	女方因素	4	1.9	1392	1.1	3	5.04	2.14	59.09	2	9	8	B	IVF	1	0	1	0	0	0	0	否	否	全胚冷冻
1129	0	2016050139	张俊茹	≥35	39	1	刺激方案	1	182.143	＞10天	14	≤3000	2550	HCG	2	3	1	继发不孕	0.94	≤24	23.4	女方因素	4	7.08	1350	1.35	2	8.72	2.14	32.34	4	5	10.4	A	IVF	2	0	1	0	1	1	0	否	是	移植	未妊娠
357	1	2017110223	刘琳	≥35	35	2	降调节方案	3	308.333	＞10天	18	＞3000	5550	HCG	1	2	1	继发不孕	1.6	＞24	24.6	女方因素	7	1.07	1820	0.56	5	6.53	2.15	59.09	2	11	13.8	A-B	IVF	3	1	3	0	0	0	0	否	否	全胚冷冻
1352	1	C00004266	刘爽	＜35	33	1	降调节方案	3	356.25	≤10天	8	≤3000	2850	HCG	3	1	0	原发不孕	1.7	≤24	22	女方因素	3	0.47	573	0.31	2	9.03	2.15	30	1	10	10.4	A	IVF	0	0	0	0	0	0	0	是		无可移植胚胎
48	0	C00003760	皇甫存存	＜35	31	1	降调节方案	3	167.308	＞10天	13	≤3000	2175	HCG	1	1	0	继发不孕	1.35	≤24	15.2	女方因素	9	1.66	2031	1.08	7	5.16	2.16	44	1	14	9	A	IVF	4	1	3	1	2	2	0	否	是	移植	未妊娠
1750	0	C00011926	陈泽玲	＜35	31	1	拮抗剂方案	2	235.714	≤10天	7	≤3000	1650	HCG	7	0	0	原发不孕	1.64	＞24	31.2	混合因素	2	3.48	631	0.35	2	5.16	2.16	44	1	10	11.4	B	ICSI	1	0	0	0	0	0	0	是		无可移植胚胎
1757	1	C00015396	陈泽玲	＜35	31	2	拮抗剂方案	2	300	＞10天	12	＞3000	3600	HCG	7	0	0	原发不孕	2.85	＞24	31.2	混合因素	2	1.39	616	0.59	5	5.16	2.16	44	1	12	13.1	B	ICSI	3	1	1	0	0	0	0	否	否	全胚冷冻
2278	0	2017100066	王玉萍	＜35	30	1	刺激方案	1	187.5	≤10天	8	≤3000	1500	HCG	4	0	0	原发不孕	0.95	≤24	21.6	女方因素	1	9.65	433	2.5	0	12.16	2.16	44	3	4				0	0	0	0	0	0	0	是		未取到卵
260	0	C00008118	张启艳	≥35	42	3	降调节方案	3	247.5	≤10天	10	≤3000	2475	HCG	2	4	1	继发不孕	2.24	≤24	24	男方因素	7	0.46	1567	0.82	7	8.05	2.17	106.43	2	16	7.5	A	ICSI	3	0	3	0	2	2	0	否	是	移植	未妊娠
352	1	C00004390	张启艳	≥35	41	2	降调节方案	3	316.667	≤10天	9	≤3000	2850	HCG	2	4	1	继发不孕	1.47	≤24	24	女方因素	7	0.45	1839	1.12	8	8.05	2.17	66.43	2	15	11.3	A	IVF	0	0	0	0	0	0	0	否	否	全胚冷冻
386	0	C00014974	陈双	＜35	33	1	拮抗剂方案	2	281.25	≤10天	8	≤3000	2250	HCG	4	2	0	继发不孕	2.26	＞24	24.7	女方因素	7	4	1554	1.02	5	8.33	2.17	45	1	8	13.7	A	IVF	5	0	2	1	2	2	0	否	是	移植	未妊娠
393	1	C00018544	陈双	＜35	33	2	降调节方案	3	300	＞10天	16	＞3000	4800	HCG	4	2	0	继发不孕	1.62	＞24	24.7	女方因素	7	1.51	1400.54	1.11	3	8.33	2.17	45	1	8	1.26	B	IVF	3	0	1	1	0	0	0	否	否	全胚冷冻
940	0	2016040293	李海风	≥35	39	2	降调节方案	3	225	＞10天	11	≤3000	2475	HCG	3	1	0	继发不孕	1.96	＞24	25.7	女方因素	4	1.21	811	0.42	5	9.35	2.19	34	2	9	9	A	IVF	4	0	2	1	2	2	0	否	是	移植	未妊娠
831	0	C00004576	司倩倩	＜35	34	1	降调节方案	3	252.273	＞10天	11	≤3000	2775	HCG	3	5	0	继发不孕	2.3	≤24	23	女方因素	5	5.06	1434	1.05	7	7.89	2.2	41	1	12	7.8	A	IVF	6	0	4	3	2	2	0	否	是	移植	未妊娠
1608	0	C00015898	尚连芳	≥35	40	1	拮抗剂方案	2	283.333	≤10天	9	≤3000	2550	HCG	2	2	1	继发不孕	0.76	＞24	24.4	女方因素	2	6.82	989	1.16	2	6.81	2.2	37.19	4	5	11.5	B	IVF	2	0	2	2	0	0	0	否	否	全胚冷冻
1729	1	2016100131	邢爱景	≥35	47	2	刺激方案	1	300	≤10天	8	≤3000	2400	HCG	1	0	0	继发不孕	0.80	≤24	22.8	女方因素	2	7.1	680	0.9	2	17.89	2.2	41	4	3	5	A	IVF	1	0	1	0	0	0	0	否	否	全胚冷冻
1587	1	C00010094	乔秀颐	≥35	39	1	拮抗剂方案	2	335	≤10天	10	＞3000	3350	HCG	1	0	0	原发不孕	1.28	≤24	20.4	女方因素	3	1.83	1034	0.38	3	6.77	2.21	73	2	9	9.8	A	IVF	3	0	2	0	0	0	0	否	否	全胚冷冻
1701	0	C00011340	乔秀颐	≥35	40	3	拮抗剂方案	2	150	≤10天	5	≤3000	750	HCG	1	0	0	原发不孕	1.5	≤24	20.4	女方因素	2	2.1	752	0.28	2	6.77	2.21	73	2	9	0.9	A-B	IVF	1	0	1	1	1	1	0	否	是	移植	已妊娠	临床妊娠	宫外妊娠	异位妊娠
621	0	2017090258	马天燕	＜35	34	1	降调节方案	3	184.091	＞10天	11	≤3000	2025	HCG	2	2	1	继发不孕	2.09	≤24	22	女方因素	6	0.51	1306	0.68	8	7.17	2.22	65.76	1	16	11	A-B	IVF	7	0	2	1	2	2	0	否	是	移植	已妊娠	临床妊娠	宫内妊娠	双胎宫内妊娠
895	1	C00018304	李玲	≥35	37	1	刺激方案	1	300	＞10天	11	＞3000	3300	HCG	4	0	0	原发不孕	1.3	≤24	22.7	男方因素	5	1.87	1052.14	0.78	4	7.82	2.22	14	2	8	5.6	B	ICSI	1	0	1	1	0	0	0	否	否	全胚冷冻
927	1	C00019249	李玲	≥35	38	2	刺激方案	1	375	≤10天	10	＞3000	3750	HCG	1	0	0	原发不孕	1.75	≤24	22.7	男方因素	4	7.34	883.58	1.12	1	7.82	2.22	14	2	6	7.3	B	ICSI	1	0	0	0	0	0	0	是		无可移植胚胎
1503	1	C00017927	王世英	≥35	39	1	刺激方案	1	300	≤10天	10	≤3000	3000	HCG	1	3	1	继发不孕	1.34	＞24	29.7	女方因素	3	12.67	952	4.39	2	5.08	2.22	55	2	8	6.2	C	IVF	1	0	0	0	0	0	0	是		无可移植胚胎
1507	1	C00018798	王世英	≥35	39	2	刺激方案	1	300	≤10天	5	≤3000	1500	HCG	1	3	1	继发不孕	2.340	＞24	29.7	女方因素	3	3.79	892	0.95	3	5.08	2.22	55	2	8	9.1	B-C	IVF	1	0	0	0	0	0	0	是		无可移植胚胎
1634	0	2017080122	刘书香	≥35	41	2	刺激方案	1	225	≤10天	9	≤3000	2025	HCG	4	4	1	继发不孕	0.6	＞24	26.2	男方因素	2	2.59	899	0.32	3	6.52	2.23	45.98	4	5	8.2	B	ICSI	4	0	2	2	0	0	0	否	否	全胚冷冻
949	0	C00005494	李媛媛	≥35	39	3	拮抗剂方案	2	225	≤10天	6	≤3000	1350	HCG	1	4	1	继发不孕	1.67	＞24	26.7	女方因素	4	1.59	708	1.55	5	5.98	2.24	31	2	8	11.2	A-B	IVF	1	0	0	0	0	0	0	是		无可移植胚胎
1092	0	C00008571	李媛媛	≥35	39	5	刺激方案	1	281.25	≤10天	8	≤3000	2250	HCG	1	4	1	继发不孕	2.55	＞24	26.7	女方因素	4	10.18	1472	1.01	4	5.98	2.24	51	2	8	0.73	A-B	IVF	3	0	2	0	0	0	0	否	否	全胚冷冻
1195	0	2017030021	李媛媛	≥35	36	1	降调节方案	3	158.333	≤10天	9	≤3000	1425	HCG	2	0	0	继发不孕	2.8	＞24	26.7	女方因素	4	6.17	1067	0.63	3	5.98	2.24	56.45	2	12	12.1	A-B	IVF	2	0	1	0	0	0	0	否	否	全胚冷冻
1664	1	C00007363	李媛媛	≥35	39	4	刺激方案	1	300	≤10天	9	≤3000	2700	双扳机	1	4	1	继发不孕	1.2	＞24	26.7	女方因素	2	7.87	835	0.93	3	5.98	2.24	73.77	2	8	0.75	A-B	IVF	3	0	2	1	0	0	0	否	否	全胚冷冻
421	1	2017030092	鲁桂芹	≥35	38	3	刺激方案	1	405	＞10天	15	＞3000	6075	HCG	1	1	0	继发不孕	2.64	＞24	29.3	女方因素	7	0.95	1010	1.7	8	8.25	2.25	34.76	2	10	10.6	A	IVF	2	0	2	1	0	0	0	否	否	全胚冷冻
1064	0	2018010047	鲁桂芹	≥35	38	4	刺激方案	1	217.5	≤10天	10	≤3000	2175	HCG	1	2	0	继发不孕	1.44	＞24	29.3	不明原因	4	5.48	1638	0.62	5	8.25	2.25	76.43	2	10	9.4	B	IVF	4	0	2	1	0	0	0	否	否	全胚冷冻
470	0	2017050093	姜林君	＜35	28	2	刺激方案	1	215.625	≤10天	8	≤3000	1725	HCG	3	0	0	原发不孕	3.05	≤24	22.4	男方因素	6	1.11	1814	1.37	6	7.32	2.26	49.09	1	10	14.7		ICSI	4	0	1	0	0	0	0	否	否	全胚冷冻
661	0	C00003376	陈昕	＜35	32	2	降调节方案	3	140	≤10天	10	≤3000	1400	HCG	3	1	0	继发不孕	4.2	＞24	25.7	混合因素	5	0.54	435	0.37	1	5.72	2.26	34	1	30	10.2	A-B	ICSI	1	0	1	0	1	1	0	否	是	移植	未妊娠
840	1	2018030253	赵荣雪	≥35	39	2	刺激方案	1	375	≤10天	9	＞3000	3375	HCG	3	4	1	继发不孕	1.76	＞24	26	女方因素	5	6.63	1375	0.68	9	8.75	2.26	38	2	11	7.4	A	IVF	3	0	2	0	0	0	0	否	否	全胚冷冻
1180	0	2016080052	赵洪燕	＜35	33	2	刺激方案	1	247.5	≤10天	10	≤3000	2475	HCG	4	1	1	继发不孕	0.23	＞24	24.8	混合因素	4	1.84	1129	0.93	2	7.47	2.26	84.41	3	3	9.9	B	ICSI	1	0	0	0	0	0	0	是		无可移植胚胎
382	1	2018020066	司桂香	≥35	42	1	降调节方案	3	375	≤10天	10	＞3000	3750	HCG	2	2	1	继发不孕	2.42	＞24	26	男方因素	7	2.74	1584	1.46	6	6.66	2.27	33.77	2	8	11.6		ICSI	3	0	2	1	2	2	0	否	是	移植	未妊娠
1816	1	2016040129	王明爱	≥35	43	1	刺激方案	1	316.667	≤10天	9	≤3000	2850	HCG	3	1	0	继发不孕	0.365	≤24	20.3	女方因素	2	0.51	516	0.42	0	8.91	2.27	29.6	4	3	7.5	A-B		0	0	0	0	0	0	0	是		未取到卵
1870	1	2016060158	王明爱	≥35	43	2	刺激方案	1	300	≤10天	9	≤3000	2700	HCG	3	1	0	继发不孕	0.11	≤24	20.3	女方因素	2	0.33	351	0.54	1	8.91	2.27	29.6	4	3	11.4		IVF	1	0	1	0	0	0	0	否	否	全胚冷冻
1985	0	2017100160	王明爱	≥35	44	6	刺激方案	1	150	≤10天	7	≤3000	1050	HCG	3	1	0	继发不孕	0.76	≤24	20.3	女方因素	2	8.56	393	0.34	2	8.91	2.27	70.1	4	3	9.5	A-B	IVF	2	0	2	1	0	0	0	否	否	全胚冷冻
2110	0	2017020078	王明爱	≥35	44	5	刺激方案	1	150	≤10天	7	≤3000	1050	HCG	3	1	0	继发不孕	0.9	≤24	20.3	女方因素	1	16.07	454	1.52	1	8.91	2.27	70.1	4	3	10.5	B	IVF	1	0	1	0	0	0	0	否	否	全胚冷冻
473	1	C00010143	范丽红	＜35	34	1	降调节方案	3	432.353	＞10天	17	＞3000	7350	HCG	2	1	1	继发不孕	2.22	＞24	28.5	女方因素	6	2.29	1798	1.05	7	8.68	2.28	43	1	13	12.5	B	IVF	6	0	4	1	2	2	0	否	是	移植	未妊娠
745	1	2016040203	王霞	＜35	34	1	刺激方案	1	300	≤10天	9	≤3000	2700	HCG	3	1	1	继发不孕	2.17	＞24	25.2	不明原因	5	1.76	1422	0.93	7	5.36	2.28	78	1	13	16	B	IVF	5	0	2	0	2	2	0	否	是	移植	已妊娠	临床妊娠	宫内妊娠	单胎宫内妊娠
1283	0	2016010123	徐传梅	＜35	34	1	降调节方案	3	233.333	＞10天	12	≤3000	2800	HCG	3	1	1	继发不孕	1.22	≤24	23.4	混合因素	3	1.24	828	1.38	2	8.68	2.28	43	1	7	10.2	A	ICSI	1	0	1	0	1	1	0	否	是	移植	未妊娠
3	1	2017110141	刘希香	≥35	44	1	降调节方案	3	305.357	＞10天	14	＞3000	4275	HCG	1	4	1	继发不孕	1.22	＞24	28	女方因素	10	0.76	2535	0.89	7	8.56	2.29	70.1	2	15	13.7	A	IVF	3	0	2	0	2	2	0	否	是	移植	未妊娠
365	1	2016060005	毕海段	≥35	36	1	刺激方案	1	351.923	＞10天	13	＞3000	4575	HCG	1	3	1	继发不孕	1.71	≤24	22.5	女方因素	7	0.92	1767	0.99	6	7.31	2.29	65.76	2	8	11.6	A	IVF	4	0	1	1	1	1	0	否	是	移植	未妊娠
717	1	2016090213	毕海段	≥35	36	2	刺激方案	1	300	＞10天	11	＞3000	3300	HCG	1	3	1	继发不孕	1.33	≤24	22.5	女方因素	5	0.4	1600	1.16	6	7.31	2.29	34.76	2	8	9	B	IVF	5	0	2	1	2	2	0	否	是	移植	未妊娠
220	1	C00012340	王小霞	≥35	37	1	拮抗剂方案	2	329.167	≤10天	9	≤3000	2962.5	HCG	8	3	1	继发不孕	2.24	＞24	25.4	混合因素	8	2.42	1634	0.16	6	9.38	2.3	38	2	11	12.5	A	ICSI	2	0	2	1	2	2	0	否	是	移植	已妊娠	临床妊娠	宫内妊娠	单胎宫内妊娠
1342	1	2016120119	郝琳	＜35	33	1	刺激方案	1	318.75	≤10天	8	≤3000	2550	HCG	5	0	0	原发不孕	0.90	＞24	25.9	混合因素	3	16.85	615	0.5		8.05	2.31	78	3	6	11	A		0	0	0	0	0	0	0	是		未取卵
2020	0	2017080163	李红	≥35	45	1	拮抗剂方案	2	241.667	≤10天	9	≤3000	2175	HCG	11	4	0	原发不孕	0.48	＞24	31.3	混合因素	1	24.39	771	0.69		9.48	2.31	99.09	4	3	6.8	A-B		0	0	0	0	0	0	0	是		未取卵
27	0	2016080161	刘艳霞	＜35	32	2	降调节方案	3	289.286	＞10天	14	＞3000	4050	HCG	6	0	0	原发不孕	2.1	≤24	20.3	混合因素	10	1.5	1621	1.02	8	10.13	2.32	25.42	1	16			ICSI	4	0	1	0	1	1	0	否	是	移植	未妊娠
532	0	2016060091	刘艳霞	＜35	31	1	刺激方案	1	281.25	≤10天	8	≤3000	2250	HCG	6	0	0	原发不孕	3.70	≤24	20.3	女方因素	6	0.93	2085	1.37	6	10.13	2.32	25.42	1	16	13	A	IVF	3	0	0	0	0	0	0	是		无可移植胚胎
1425	0	2017110083	江延珍	＜35	34	1	降调节方案	3	143.75	＞10天	12	≤3000	1725	HCG	2	2	0	继发不孕	1.36	＞24	26.7	女方因素	5	1.62	1455	0.68	7	5.07	2.32	39	1	15	10.8	B	IVF	7	0	7	5	2	2	0	否	是	移植	未妊娠
125	0	C00005254	史俊	≥35	38	1	降调节方案	3	175	＞10天	15	≤3000	2625	HCG	10	1	1	继发不孕	2.15	＞24	31.9	女方因素	8	0.36	1977	1.34	7	5.92	2.34	33	2	49	7.3	B	IVF	6	0	2	0	0	0	0	否	否	全胚冷冻
1068	1	C00016465	林海燕	≥35	47	6	刺激方案	1	422.727	＞10天	11	＞3000	4650	HCG	20	1	0	继发不孕	0.38	＞24	28.2	女方因素	4	2.35	1588	0.99	4	7.3	2.34	35	4	4	9.4	A-B	IVF	2	0	2	1	0	0	0	否	否	全胚冷冻
2050	0	C00018188	林海燕	≥35	47	8	刺激方案	1	210	≤10天	10	≤3000	2100	HCG	20	1	0	继发不孕	0.67	＞24	28.2	女方因素	1	5.18	652.93	0.17	1	7.3	2.34	35	4	3	0.56	B	IVF	0	0	0	0	0	0	0	是		无可移植胚胎
1397	0	2017010069	吴贵月	＜35	26	1	降调节方案	3	187.5	＞10天	14	≤3000	2625	HCG	3	0	0	原发不孕	1.07	＞24	28	女方因素	3	1.39	888	0.71	3	6.18	2.35	78.43	3	4	11.2	A-B	IVF	3	0	2	2	2	2	0	否	是	移植	已妊娠	临床妊娠	宫内妊娠	双胎宫内妊娠
1187	0	2017030193	李寿勤	＜35	26	1	降调节方案	3	256.25	＞10天	12	＞3000	3075	HCG	4	0	0	原发不孕	1.67	≤24	19.7	女方因素	4	1.27	1112	0.81	5	6.66	2.36	44.07	1	7	14.9	A	IVF	5	0	2	1	2	2	0	否	是	移植	已妊娠	临床妊娠	宫内妊娠	单胎宫内妊娠
1989	0	2018040149	王芳	≥35	45	1	刺激方案	1	225	≤10天	7	≤3000	1575	HCG	1	0	0	原发不孕	0.42	≤24	23.6	女方因素	2	10	405	0.43	2	7.74	2.36	60.56	4	8	4.8	A	IVF	2	0	1	0	0	0	0	否	否	全胚冷冻
302	0	2017010058	王一帆	＜35	33	1	降调节方案	3	207.5	≤10天	10	≤3000	2075	HCG	2	0	0	继发不孕	2.83	≤24	22.6	不明原因	10	3.37	1641	0.87	7	8.28	2.37	36.43	1	12	17	B	IVF	7	0	6	1	0	0	0	否	否	全胚冷冻
1142	1	C00012754	刘秀秀	＜35	32	1	刺激方案	1	363.462	＞10天	13	＞3000	4725	HCG	8	1	1	继发不孕	1.24	≤24	22.9	女方因素	4	2.68	1304	0.21	6	5.59	2.38	40	1	15	11.5	B	IVF	6	0	4	1	2	2	0	否	是	移植	已妊娠	临床妊娠	宫内妊娠	单胎宫内妊娠
1961	1	C00017626	孙彦玲	≥35	37	2	拮抗剂方案	2	290.625	≤10天	8	≤3000	2325	双扳机	3	5	1	继发不孕	1.70	≤24	23.5	女方因素	2	6.44	484	1.03	1	5.59	2.38	40	2	11	6.8	A	IVF	1	0	1	0	0	0	0	否	否	全胚冷冻
5	1	2017030316	郑广健	≥35	39	1	刺激方案	1	375	≤10天	8	≤3000	3000	HCG	3	7	1	继发不孕	1.8	＞24	24.2	女方因素	10	2.16	2267	1.01	6	7.56	2.39	43.5	2	10	7.5	B	IVF	5	0	2	0	0	0	0	否	否	全胚冷冻
80	1	2018020008	仲伟梅	＜35	30	1	降调节方案	3	330	＞10天	15	＞3000	4950	HCG	3	0	0	原发不孕	1.37	≤24	21.2	女方因素	9	1.97	2251	0.96	6	7.77	2.39	91.75	1	12	14.4	A-B	IVF	3	0	1	0	1	1	0	否	是	移植	已妊娠	临床妊娠	宫内妊娠	单胎宫内妊娠
634	0	C00003309	朱宁文	＜35	32	1	降调节方案	3	275	＞10天	15	＞3000	4125	HCG	3	3	1	继发不孕	1.87	＞24	28.2	女方因素	6	1.09	1001	0.69	6	9.43	2.39	60	1	9	13.2	A-B	IVF	5	0	4	2	2	2	0	否	是	移植	未妊娠
970	1	C00016673	郑妮	≥35	38	6	刺激方案	1	300	≤10天	10	≤3000	3000	HCG	5	2	1	继发不孕	2.56	＞24	24.4	女方因素	4	14.1	1388.07	1.82	3	8.5	2.39	102	2	10	3.3	B	IVF	3	0	1	1	0	0	0	否	否	全胚冷冻
1045	1	C00014153	郑妮	≥35	37	5	刺激方案	1	300	≤10天	9	≤3000	2700	HCG	5	2	1	继发不孕	1.50	＞24	24.4	女方因素	4	1.93	1772	1.11	4	8.5	2.39	43.5	2	7	8.7	A-B	IVF	3	0	3	2	2	2	0	否	是	移植	未妊娠
1783	0	C00003667	郑妮	≥35	35	3	刺激方案	1	283.929	＞10天	14	＞3000	3975	HCG	2	2	1	继发不孕	1.3	＞24	24.4	女方因素	2	2.16	576	0.57	2	8.5	2.39	31.76	2	10	8.1	A-B	IVF	1	0	0	0	0	0	0	是		无可移植胚胎
2181	1	2017070210	左丽	≥35	36	1	降调节方案	3	364.286	≤10天	7	≤3000	2550	HCG	1	1	0	继发不孕	0.77	＞24	26.7	混合因素	1	17.73	304	3.78	0	16.73	2.41	56.89	4	5	7.7	A		0	0	0	0	0	0	0	是		未取到卵
123	1	2017080200	王小娟	＜35	30	2	降调节方案	3	325	≤10天	9	≤3000	2925	HCG	7	1	0	原发不孕	2.77	＞24	28	男方因素	9	0.61	1094	1.59	5	5.9	2.42	42	1	12			ICSI	1	0	1	0	1	1	0	否	是	移植	已妊娠	临床妊娠	宫内妊娠	单胎宫内妊娠
1133	0	2017070031	李秀梅	≥35	42	4	降调节方案	3	240	≤10天	10	≤3000	2400	HCG	1	4	1	继发不孕	0.58	＞24	26	混合因素	4	0.78	1338	0.55	5	15.05	2.42	17	4	8	8.3	B	ICSI	3	0	3	2	0	0	0	否	否	全胚冷冻
78	0	2017040032	岳桃	＜35	28	1	降调节方案	3	225	＞10天	12	≤3000	2700	HCG	3	1	1	继发不孕	3.65	＞24	25.6	混合因素	9	2.13	2263	1.78	7	4.21	2.43	39	1	13	14.3	A-B	ICSI	4	0	2	0	0	0	0	否	否	全胚冷冻
1431	1	C00010756	赵玉香	≥35	46	1	刺激方案	1	300	≤10天	10	≤3000	3000	HCG	11	4	1	继发不孕	0.54	≤24	23.3	混合因素	3	23.79	955	8.79	0	14.26	2.43	34	4	4	5.6	B		0	0	0	0	0	0	0	是		未取到卵
1577	1	2017040142	杨明臻	≥35	40	1	降调节方案	3	302.885	＞10天	26	＞3000	7875	HCG	10	0	0	继发不孕	1.44	＞24	25	混合因素	3	4.07	1063	0.71	4	6.91	2.43	50.1	2	7	18.7	B	ICSI	2	0	2	0	0	0	0	否	否	全胚冷冻
269	1	2017080156	韩帼	＜35	31	3	刺激方案	1	300	＞10天	12	＞3000	3600	HCG	5	0	0	原发不孕	2.72	≤24	18.4	男方因素	7	11.4	2301	1.43	8	7.02	2.44	73.4	1	14	6.7	B	ICSI	4	0	2	0	0	0	0	否	否	全胚冷冻
1208	0	2016110280	韩帼	＜35	30	2	降调节方案	3	288.462	＞10天	13	＞3000	3750	HCG	5	0	0	原发不孕	2.99	≤24	18.4	男方因素	4	1.72	1006	0.51	5	7.02	2.44	73.4	1	14	13.7	A	ICSI	3	0	1	1	1	1	0	否	是	移植	未妊娠
2132	0	2016110143	王梓琪	＜35	28	2	降调节方案	3	155.357	＞10天	14	≤3000	2175	HCG	4	0	0	原发不孕	3.43	≤24	21.7	女方因素	1	1.63	412	0.45	1	6.89	2.44	56.43	1	18	12.1	B	IVF	1	0	0	0	0	0	0	是		无可移植胚胎
234	1	2017070155	杨本兰	≥35	35	1	降调节方案	3	309.375	＞10天	16	＞3000	4950	HCG	4	2	0	继发不孕	2.64	＞24	48.7	女方因素	8	0.66	1204	0.45	6	4.85	2.45	29	2	23	15	B	IVF	6	0	3	1	0	0	0	否	否	全胚冷冻
1771	1	2017050221	王春荣	＜35	29	1	刺激方案	1	300	≤10天	7	≤3000	2100	HCG	2	0	0	原发不孕	2.340	≤24	22.1	混合因素	2	10.14	599	0.46	2	10.04	2.45	17	1	8	5.7	A-B	ICSI	2	0	2	0	0	0	0	否	否	全胚冷冻
2042	1	C00018334	孟红英	≥35	35	1	拮抗剂方案	2	345.455	＞10天	11	＞3000	3800	HCG	5	1	0	继发不孕	1.84	＞24	27.2	混合因素	1	8.16	661.85	1.19	2	8.4	2.45	34.56	2	7	7.5	A	ICSI	1	0	1	1	1	1	0	否	是	移植	已妊娠	临床妊娠	宫内妊娠	单胎宫内妊娠
310	0	C00004421	李秀芳	≥35	41	2	降调节方案	3	236.538	＞10天	13	＞3000	3075	HCG	2	2	1	继发不孕	1.2	≤24	20.8	女方因素	7	0.68	2253	1.31	7	8.58	2.48	59.09	2	8	11.9	A-B	IVF	4	2	2	0	0	0	0	否	否	全胚冷冻
2009	0	2018050218	李秀芳	≥35	40	1	刺激方案	1	150	≤10天	6	≤3000	900	HCG	2	2	1	继发不孕	1.95	≤24	20.8	女方因素	1	1.43	920	0.89	3	8.58	2.48	59.09	2	7	10.3	A	IVF	3	0	2	1	2	2	0	否	是	移植	未妊娠
54	0	C00017332	牛兆翠	＜35	34	2	降调节方案	3	275	≤10天	10	≤3000	2750	HCG	9	0	0	原发不孕	3.06	≤24	22.7	女方因素	9	1.44	2923	0.97	9	7.14	2.49	40	1	20	10.7	A	IVF	7	0	2	1	2	2	0	否	是	移植	未妊娠
237	1	C00015283	魏芳玲	≥35	37	1	拮抗剂方案	2	359.375	≤10天	8	≤3000	2875	HCG	2	2	1	继发不孕	3.13	＞24	29.3	女方因素	8	1.25	1159	0.49	8	7.14	2.49	40	2	14	14.6	A-B	IVF	3	0	2	1	2	2	0	否	是	移植	已妊娠	临床妊娠	宫内妊娠	单胚胎停
262	1	C00016648	贾晓婷	＜35	28	2	降调节方案	3	381.818	＞10天	11	＞3000	4200	HCG	1	0	0	继发不孕	2.19	＞24	24.6	女方因素	7	2.55	1548	1.24	6	8.76	2.49	27	1	10	12.2	B	IVF	3	2	2	0	1	0	1	否	是	移植	已妊娠	临床妊娠	宫内妊娠	单胎宫内妊娠
33	0	2017090079	吴海燕	≥35	39	2	降调节方案	3	287.5	＞10天	12	＞3000	3450	HCG	2	4	1	继发不孕	2.36	＞24	25.3	女方因素	9	1.07	1481	0.46	9	7.34	2.5	43.5	2	18	9.2	A	IVF	0	0	1	0	0	0	0	否	否	全胚冷冻
102	0	C00019039	袁轶男	≥35	38	1	拮抗剂方案	2	225	≤10天	7	≤3000	1575	HCG	1	1	1	继发不孕	3.4	≤24	22.8	女方因素	7	2.35	1589	0.66	8	7.05	2.5	42.66	2	15	1.16	A-B	IVF	5	0	5	2	2	2	0	否	是	移植	未妊娠
300	0	C00006899	王雪	＜35	29	1	降调节方案	3	236.538	＞10天	13	＞3000	3075	HCG	3	2	0	继发不孕	2.41	≤24	20.8	女方因素	7	0.84	2660	1.19	7	8.5	2.5	35	1	17	0.92	A	IVF	3	1	3	0	0	0	0	否	否	全胚冷冻
460	1	C00016738	王静	≥35	39	4	刺激方案	1	300	＞10天	17	＞3000	5100	HCG	4	2	1	继发不孕	2.03	≤24	20.2	混合因素	6	13.4	1684	1.77	5	10.1	2.5	36	2	8	0.78	A	ICSI	5	0	2	0	0	0	0	否	否	全胚冷冻
552	0	2016030262	田媛	≥35	36	1	拮抗剂方案	2	246.429	≤10天	7	≤3000	1725	HCG	7	0	0	原发不孕	1.86	＞24	24.4	女方因素	6	3.11	1883	0.76	6	7.05	2.5	42.66	2	9	13.1	B	IVF	5	0	2	0	2	2	0	否	是	移植	未妊娠
702	0	C00018030	郭艳华	＜35	30	1	拮抗剂方案	2	278.571	≤10天	7	≤3000	1950	HCG	4	2	1	继发不孕	2.09	≤24	19.8	女方因素	5	0.49	1683.21	0.69	6	16.7	2.5	52.8	1	11	12.6	A	IVF	4	0	2	0	0	0	0	否	否	全胚冷冻
1021	1	C00009097	王静	≥35	37	2	刺激方案	1	436.364	＞10天	11	＞3000	4800	HCG	3	2	1	继发不孕	0.81	≤24	20.2	混合因素	4	6.02	1189	0.66	2	10.1	2.5	36	4	6	0.82	A-B	ICSI	1	0	1	0	0	0	0	否	否	全胚冷冻
1549	1	C00018963	王静	≥35	39	6	刺激方案	1	300	≤10天	9	≤3000	2700	HCG	4	2	1	继发不孕	0.41	≤24	20.2	混合因素	3	7.84	1160.27	0.8	4	10.1	2.5	36	4	5	10.5	A	ICSI	5	0	2	0	2	2	0	否	是	移植	未妊娠
1768	0	2017060032	陈美玲	＜35	30	4	降调节方案	3	115.385	＞10天	13	≤3000	1500	HCG	1	2	0	继发不孕	3.54	＞24	26	不明原因	2	1.71	602	0.78	2	6.32	2.5	51.38	1	20	9.6	A	IVF	2	0	1	0	1	1	0	否	是	移植	未妊娠
67	0	2016080188	鞠孟杰	＜35	27	1	降调节方案	3	184.615	＞10天	13	≤3000	2400	HCG	5	0	0	原发不孕	4.03	≤24	20.6	女方因素	9	5.37	2606	0.96	7	7.19	2.51	59.09	1	18	12.1	A	IVF	6	0	1	0	1	1	0	否	是	移植	已妊娠	临床妊娠	宫内妊娠	单胎宫内妊娠
90	1	2016100093	高羽	＜35	34	2	刺激方案	1	362.5	＞10天	12	＞3000	4350	HCG	1	5	0	继发不孕	4.62	＞24	25.2	女方因素	9	1.21	2060	0.97	8	5.76	2.51	43	1	11	6.3	A-B	IVF	5	0	4	1	0	0	0	否	否	全胚冷冻
1054	0	C00009986	霍秋红	≥35	41	2	拮抗剂方案	2	255	≤10天	10	≤3000	2550	双扳机	7	6	0	继发不孕	1.25	＞24	25.2	女方因素	4	3.93	1700	0.93	6	9.31	2.51	45	2	8			IVF	1	0	1	0	1	1	0	否	是	移植	未妊娠
1166	0	2016120014	张吉玲	≥35	36	2	刺激方案	1	270	≤10天	10	≤3000	2700	HCG	1	4	1	继发不孕	0.54	＞24	25.7	女方因素	4	2.59	1198	0.72	4	5.23	2.51	42	4	5	8.1	B	IVF	2	0	1	0	0	0	0	否	否	全胚冷冻
1468	0	C00005218	何华珍	≥35	48	1	刺激方案	1	259.615	＞10天	13	＞3000	3375	双扳机	1	6	2	继发不孕	0.32	≤24	19.6	女方因素	3	6.75	952	0.97	1	5.23	2.51	42	4	4	4.6	B	IVF	1	0	1	1	0	0	0	否	否	全胚冷冻
1697	0	2016090219	张吉玲	≥35	36	1	刺激方案	1	225	≤10天	8	≤3000	1800	HCG	1	4	1	继发不孕	0.93	＞24	25.7	女方因素	2	1.31	757	0.33	3	5.23	2.51	42	4	5	6.8	B	IVF	3	0	1	0	0	0	0	否	否	全胚冷冻
1639	1	C00004501	文风花	≥35	48	1	刺激方案	1	375	≤10天	9	＞3000	3375	HCG	2	3	2	继发不孕	0.32	＞24	25	女方因素	2	4.34	890	2.82	2	8.69	2.52	35.23	4	4	0.84	B	IVF	2	0	1	0	0	0	0	否	否	全胚冷冻
2125	1	C00014910	谭希兰	≥35	46	1	拮抗剂方案	2	398.438	＞10天	16	＞3000	6375	HCG	1	1	1	继发不孕	0.09	≤24	23.9	混合因素	1	9.29	424	1.04	1	14.25	2.52	24	4	3	11.2	A		0	0	0	0	0	0	0	是		未行授精
1812	1	C00012710	尹燕留	≥35	45	2	刺激方案	1	300	≤10天	7	≤3000	2100	HCG	1	4	1	继发不孕	0.33	＞24	26.7	女方因素	2	0.68	526	0.16	3	8.52	2.53	31	4	7	0.72	A-B	IVF	3	0	1	0	0	0	0	否	否	全胚冷冻
728	1	C00016216	马杰	≥35	40	1	降调节方案	3	300	＞10天	11	＞3000	3300	HCG	1	4	1	继发不孕	1.58	＞24	25	女方因素	5	1.22	1528	0.55	5	8.68	2.55	57	2	10	18.4	B	IVF	4	0	0	0	0	0	0	是		无可移植胚胎
866	0	C00005637	黄传兰	＜35	33	3	刺激方案	1	262.5	≤10天	10	≤3000	2625	HCG	4	0	0	原发不孕	2.16	＞24	28.4	男方因素	5	5.51	1206	1.04	4	7.48	2.55	46.81	1	11	12.6	A	ICSI	3	0	2	0	2	2	0	否	是	移植	已妊娠	临床妊娠	宫内妊娠	单胎宫内妊娠
1911	0	2016110009	曹红华	≥35	38	2	刺激方案	1	225	≤10天	6	≤3000	1350	HCG	2	3	1	继发不孕	0.06	≤24	21.8	女方因素	2	1.86	502	1.11	4	7.42	2.55	45.76	4	4	11.5	A-B	IVF	2	0	1	0	0	0	0	否	否	全胚冷冻
1969	0	2016060028	曹红华	≥35	38	1	刺激方案	1	225	≤10天	9	≤3000	2025	HCG	2	3	1	继发不孕	0.17	≤24	21.8	女方因素	4	0.41	863	3.02	5	7.42	2.55	56.76	4	4	9	B-C	IVF	1	0	1	0	0	0	0	否	否	全胚冷冻
1982	0	2016060230	李海霞	≥35	37	2	降调节方案	3	256.25	＞10天	12	＞3000	3075	HCG	6	1	1	继发不孕	2.67	＞24	29.8	女方因素	2	0.84	414	0.42	2	7.86	2.55	35.42	2	20	13.4	A	IVF	2	0	2	0	2	2	0	否	是	移植	已妊娠	临床妊娠	宫内妊娠	单胚胎停
1153	0	2017070253	赵美玲	＜35	32	1	降调节方案	3	275	＞10天	12	＞3000	3300	HCG	9	1	0	继发不孕	1.6	≤24	17.4	女方因素	4	0.81	1246	1.01	4	9.36	2.56	37	1	11	12.2	A	IVF	4	0	3	0	2	2	0	否	是	移植	已妊娠	临床妊娠	宫内妊娠	单胎宫内妊娠
1779	0	C00006020	赵芬燕	＜35	34	1	降调节方案	3	279.545	＞10天	11	＞3000	3075	HCG	4	2	0	继发不孕	1.3	≤24	20.6	女方因素	2	2.03	583	0.16	2	7.94	2.58	26	1	9	9.3	A	IVF	2	0	2	0	2	2	0	否	是	移植	已妊娠	临床妊娠	宫内妊娠	单胎宫内妊娠
566	1	2016080120	李秀梅	≥35	41	3	刺激方案	1	300	≤10天	7	≤3000	2100	HCG	1	4	1	继发不孕	1.7	＞24	26	混合因素	6	1.28	1798	0.91	4	9.56	2.59	39	2	8	7.2	B	ICSI	4	0	3	1	0	0	0	否	否	全胚冷冻
1051	1	2016040138	李秀梅	≥35	41	2	刺激方案	1	416.667	≤10天	9	＞3000	3750	HCG	1	4	1	继发不孕	1.13	＞24	26	男方因素	4	1.24	1736	0.75	2	10.45	2.59	39	4	7	7.3	B	ICSI	0	0	0	0	0	0	0	是		无可移植胚胎
1648	1	C00003663	施慧媛	≥35	44	1	刺激方案	1	365.625	≤10天	8	≤3000	2925	双扳机	3	1	1	原发不孕	0.10	≤24	23.9	女方因素	2	9.96	866	1.21	1	3.39	2.59	44	4	4	6.3	A	IVF	1	0	1	0	0	0	0	否	否	全胚冷冻
299	0	C00004757	臧芹	≥35	41	2	降调节方案	3	245.192	＞10天	13	＞3000	3187.5	HCG	3	4	0	继发不孕	1.75	≤24	23.5	女方因素	7	0.82	2663	0.48	4	5.75	2.6	74	2	14	9.8	A	IVF	2	0	0	0	0	0	0	否	否	全胚冷冻
811	1	2018060160	王玲玲	≥35	35	1	降调节方案	3	395.455	＞10天	11	＞3000	4350	HCG	2	5	1	继发不孕	1.56	＞24	28	女方因素	5	1.07	1557	0.72	5	6.83	2.6	31	2	10	8.8	B	IVF	4	0	2	0	2	2	0	否	是	移植	已妊娠	临床妊娠	宫内妊娠	单胎宫内妊娠
1844	0	C00005239	李延美	≥35	36	1	刺激方案	1	150	≤10天	8	≤3000	1200	HCG	4	3	1	继发不孕	1.58	＞24	24.6	女方因素	2	1.61	451	0.35	0	6.68	2.6	56	2	14	11.6	B		0	0	0	0	0	0	0	是		未取到卵
2124	1	2017070201	逯伟	≥35	36	1	拮抗剂方案	2	410.4	＞10天	15	＞3000	6156	双扳机	3	3	1	继发不孕	0.77	＞24	27.3	男方因素	1	5.06	426	0.36	1	10.83	2.6	88.08	4	3	11.7	B	ICSI	4	0	3	1	0	0	0	否	否	全胚冷冻
261	0	C00017129	陈莹莹	≥35	35	1	降调节方案	3	225	≤10天	8	≤3000	1800	HCG	5	2	1	继发不孕	2.49	＞24	28.5	女方因素	7	3.07	1560	0.91	6	6.47	2.61	34	2	16	6.1	A	IVF	3	0	1	0	1	1	0	否	是	移植	未妊娠
426	0	C00018943	李静	≥35	36	1	降调节方案	3	245	≤10天	10	≤3000	2450	HCG	4	5	2	继发不孕	2.33	≤24	21.9	男方因素	7	1.07	1838	1.26	9	7.55	2.61	28.96	2	20	14.9	B	ICSI	3	0	2	1	2	2	0	否	是	移植	已妊娠	临床妊娠	宫内妊娠	单胚胎停
1346	1	C00018888	侯敏	≥35	44	1	刺激方案	1	450	＞10天	11	＞3000	4950	HCG	1	2	1	继发不孕	0.37	＞24	25.4	男方因素	3	9.27	609.56	0.61	4	7.24	2.62	52.87	4	7	6.7	B-C	ICSI	1	0	0	0	0	0	0	是		无可移植胚胎
150	0	2017110276	邱发溪	≥35	36	1	降调节方案	3	240.909	＞10天	11	≤3000	2650	HCG	1	3	1	继发不孕	4.48	≤24	22.2	不明原因	8	1.17	1960	1.25	8	7.76	2.63	39	2	13	19.5	B	IVF	4	0	2	0	2	2	0	否	是	移植	未妊娠
362	0	C00003435	邱发溪	≥35	37	3	刺激方案	1	265.909	＞10天	11	≤3000	2925	HCG	1	3	1	继发不孕	1.3	≤24	22.2	不明原因	7	2.94	1800	1.68	7	7.76	2.63	39	2	13	11	B	IVF	4	0	2	0	0	0	0	否	否	全胚冷冻
410	0	2017120152	张亚楠	＜35	24	1	降调节方案	3	225	≤10天	9	≤3000	2025	HCG	3	1	0	继发不孕	3.59	＞24	33.2	女方因素	7	0.61	1232	0.27	7	6.92	2.63	32.76	1	14	10	A	IVF	4	0	3	2	2	2	0	否	是	移植	已妊娠	临床妊娠	宫内妊娠	单胎宫内妊娠
1228	0	2018040121	邱发溪	≥35	36	2	降调节方案	3	262.5	≤10天	10	≤3000	2625	HCG	1	3	1	继发不孕	2.1	≤24	22.2	不明原因	3	0.18	971	0.65	1	7.76	2.63	29	2	13	16.3	B	IVF	1	0	1	0	0	0	0	否	否	全胚冷冻
899	1	C00019217	张玉	＜35	34	2	降调节方案	3	372.727	＞10天	11	＞3000	4100	HCG	5	2	0	继发不孕	1.26	≤24	22.8	女方因素	5	1.69	1049.33	0.92	6	6.5	2.64	27.05	1	13	1.39	A	IVF	4	0	2	1	2	2	0	否	是	移植	未妊娠
1797	1	C00017430	王连琼	≥35	38	1	拮抗剂方案	2	300	≤10天	7	≤3000	2100	HCG	2	3	0	继发不孕	1.2	≤24	18.4	女方因素	2	27.3	545	0.6	2	5.9	2.64	41.75	2	7	9.5	A-B	IVF	2	0	2	0	2	2	0	否	是	移植	未妊娠
1845	1	C00018627	王连琼	≥35	38	2	拮抗剂方案	2	300	＞10天	12	＞3000	3600	HCG	2	3	0	继发不孕	0.96	≤24	18.4	女方因素	2	6.94	444.65	0.2	4	5.9	2.64	91.75	4	7	12.7	B	IVF	3	0	2	0	2	2	0	否	是	移植	已妊娠	临床妊娠	宫内妊娠	单胎宫内妊娠
65	0	2018050121	田安红	＜35	31	1	降调节方案	3	230.769	＞10天	13	≤3000	3000	HCG	1	2	0	继发不孕	3.03	≤24	23.7	女方因素	9	1.01	2618	0.89	8	5.78	2.65	31.76	1	14	10.7	A	IVF	2	0	2	0	2	2	0	否	是	移植	已妊娠	临床妊娠	宫内妊娠	双胎宫内妊娠
172	0	C00015663	李春彦	≥35	40	2	拮抗剂方案	2	225	≤10天	10	≤3000	2250	HCG	2	4	0	继发不孕	1.67	＞24	24.6	女方因素	8	4.29	2410	1.88	4	6.63	2.65	72	2	12	0.55		IVF	2	0	0	0	0	0	0	是		无可移植胚胎
249	0	2016060130	王凤英	＜35	30	1	降调节方案	3	206.25	＞10天	16	＞3000	3300	HCG	1	2	0	继发不孕	2.5	≤24	24	女方因素	7	0.63	1833	0.41	7	6.07	2.65	36.43	1	32	12.5	B	IVF	4	0	3	1	2	2	0	否	是	移植	已妊娠	临床妊娠	宫内妊娠	双胎宫内妊娠
281	1	2017040159	郭玲春	≥35	38	1	刺激方案	1	300	＞10天	11	＞3000	3300	HCG	7	0	0	原发不孕	2.72	＞24	29.4	女方因素	7	2.38	2098	1.3	9	7.35	2.65	43	2	12	13	A	IVF	2	0	2	0	2	2	0	否	是	移植	已妊娠	临床妊娠	宫内妊娠	单胎宫内妊娠
343	1	2016110028	田辉	≥35	36	2	降调节方案	3	431.25	＞10天	16	＞3000	6900	HCG	7	0	0	原发不孕	2.88	＞24	29.4	女方因素	7	0.95	1876	0.97	9	9.45	2.65	49.09	2	12	10.2	B	IVF	5	0	1	0	1	1	0	否	是	移植	已妊娠	临床妊娠	宫内妊娠	单胎宫内妊娠
646	0	2018010153	孙灵仙	≥35	42	1	降调节方案	3	200	＞10天	11	≤3000	2200	HCG	1	3	1	继发不孕	1.87	＞24	24.4	女方因素	6	2.48	1558	0.64	7	10.47	2.65	31	2	9	12.5	A-B	IVF	6	0	6	2	2	2	0	否	是	移植	未妊娠
802	1	C00012382	李春彦	≥35	40	1	刺激方案	1	450	≤10天	10	＞3000	4500	HCG	2	4	0	继发不孕	1.58	＞24	24.6	女方因素	5	3.33	1619	0.76	7	6.63	2.65	72	2	12	0.51	B	IVF	2	0	1	0	1	1	0	否	是	移植	未妊娠
1099	1	2017050084	张华倩	≥35	39	1	降调节方案	3	353.571	≤10天	7	≤3000	2475	HCG	2	3	1	继发不孕	1.46	≤24	22.1	混合因素	4	4.57	1447	0.47	4	8.67	2.65	51.38	2	6	11.6	A	ICSI	1	0	1	0	1	1	0	否	是	移植	未妊娠
1389	0	2018010106	田相云	≥35	44	1	刺激方案	1	225	≤10天	10	≤3000	2250	HCG	3	1	1	继发不孕	0.64	≤24	24	女方因素	3	7.3	905	2.18	4	7.35	2.65	43	4	5	10.8	B	IVF	2	0	2	0	0	0	0	否	否	全胚冷冻
1702	0	2017060157	阮美丽	≥35	45	1	降调节方案	3	225	≤10天	4	≤3000	900	HCG	2	3	1	继发不孕	0.15	＞24	25.7	女方因素	2	6.43	752	0.39	3	15.98	2.65	49.09	4	4	9.5	A	IVF	1	0	1	0	1	1	0	否	是	移植	未妊娠
346	1	2017100212	张三云	≥35	42	1	降调节方案	3	300	＞10天	11	＞3000	3300	HCG	1	0	0	原发不孕	2.18	＞24	25.2	男方因素	7	2.47	1872	0.42	6	10	2.66	69	2	18	16.9	A	ICSI	4	0	3	0	2	2	0	否	是	移植	未妊娠
622	1	2017020149	蔡琳	≥35	40	1	降调节方案	3	383.333	≤10天	9	＞3000	3450	HCG	1	1	0	继发不孕	1.6	＞24	26	混合因素	6	2.21	1276	2.14	8	3.23	2.66	66.06	2	14	11.7		ICSI	3	0	4	0	2	2	0	否	是	移植	未妊娠
1251	1	C00004774	张三云	≥35	43	2	拮抗剂方案	2	425	≤10天	7	≤3000	2975	HCG	1	0	0	原发不孕	1.48	＞24	25.2	男方因素	3	2.14	907	0.37	4	10	2.66	69	2	11	14.6	A-B	ICSI	3	0	2	1	2	2	0	否	是	移植	已妊娠	临床妊娠	宫内妊娠	单胎宫内妊娠
2134	0	2016040132	黄理翠	＜35	31	1	刺激方案	1	225	≤10天	9	≤3000	2025	HCG	2	2	0	继发不孕	2.35	＞24	27.3	女方因素	1	2.11	397	0.78	0	7.28	2.66	36.43	1	8	10.8	A		0	0	0	0	0	0	0	是		未取到卵
251	0	C00003548	马媛	＜35	31	3	降调节方案	3	165	≤10天	10	≤3000	1650	HCG	5	1	0	原发不孕	2.67	≤24	22.5	女方因素	7	0.34	1742	0.5	8	7.35	2.67	40	1	12	9.6	A	IVF	2	0	1	0	1	1	0	否	是	移植	已妊娠	临床妊娠	宫内妊娠	单胚胎停
376	0	2016100196	潘燕红	≥35	37	1	降调节方案	3	238.636	＞10天	11	≤3000	2625	HCG	13	0	0	原发不孕	1.662	≤24	20.2	男方因素	7	0.6	1610	0.55	6	3.39	2.67	50	2	11	9.3	A	ICSI	4	0	3	2	2	2	0	否	是	移植	未妊娠
414	0	C00007667	郑成霞	≥35	40	1	降调节方案	3	216.667	≤10天	9	≤3000	1950	HCG	5	2	1	继发不孕	2.54	＞24	25.4	男方因素	7	0.66	1181	0.75	7	7.1	2.67	47	2	16	0.95	A	ICSI	4	0	2	0	2	2	0	否	是	移植	已妊娠	临床妊娠	宫内妊娠	双胎宫内妊娠
160	0	C00013146	张文秀	＜35	33	1	刺激方案	1	233.333	≤10天	9	≤3000	2100	HCG	5	0	0	原发不孕	3.06	≤24	21.3	女方因素	6	0.55	1975	0.54	7	10.16	2.68	41	1	9	9.3	A	IVF	6	0	5	3	2	2	0	否	是	移植	已妊娠	临床妊娠	宫外妊娠	异位妊娠
425	0	2017100068	王晶	＜35	29	1	降调节方案	3	143.182	＞10天	11	≤3000	1575	HCG	3	0	0	原发不孕	3.44	≤24	23.4	女方因素	7	0.95	1010	1.7	7	6.34	2.68	31	1	16	15.7	A-B	IVF	3	0	2	0	0	0	0	否	否	全胚冷冻
610	0	C00013038	周萍	≥35	39	1	降调节方案	3	265.909	＞10天	11	≤3000	2925	HCG	3	2	1	继发不孕	1.91	＞24	26	女方因素	6	1.94	1414	1.35	5	6.73	2.68	50	2	9	1.46	A	IVF	4	0	2	1	0	0	0	否	否	全胚冷冻
714	1	2017060146	付春红	＜35	34	1	降调节方案	3	353.571	＞10天	14	＞3000	4950	HCG	3	0	0	原发不孕	1.95	≤24	22	混合因素	5	1.06	1619	0.68	5	10.37	2.68	42	1	7	11.5	B	ICSI	5	0	2	0	0	0	0	否	否	全胚冷冻
888	0	C00015288	刘养栓	≥35	48	1	拮抗剂方案	2	215.625	≤10天	8	≤3000	1725	HCG	9	2	2	继发不孕	0.31	≤24	23.4	女方因素	5	9.5	1092	0.8	2	7.44	2.68	33	4	5	14	A	IVF	0	0	0	0	0	0	0	是		无可移植胚胎
956	0	2017070224	颜翠	＜35	32	4	刺激方案	1	283.333	≤10天	9	≤3000	2550	HCG	3	0	0	原发不孕	1.15	≤24	23	男方因素	4	8.18	612	0.54	4	9.66	2.68	32.76	3	5	8.2	A-B	ICSI	2	0	2	0	0	0	0	否	否	全胚冷冻
1303	1	2016060246	颜翠	＜35	31	1	刺激方案	1	290.625	≤10天	8	≤3000	2325	HCG	3	0	0	原发不孕	1.18	≤24	23	女方因素	3	1.84	772	0.55	3	9.66	2.68	56.76	3	5	14.6	B	IVF	0	0	0	0	0	0	0	是		未受精
1334	1	2016070075	袁红彬	≥35	45	2	刺激方案	1	300	≤10天	5	≤3000	1500	HCG	5	6	1	继发不孕	0.20	＞24	24.4	混合因素	3	18.68	644	1.25	0	10.16	2.68	41	4	3	2.7			0	0	0	0	0	0	0	是		未取到卵
1671	1	C00011671	王瑞	＜35	29	1	刺激方案	1	390.909	＞10天	11	＞3000	4300	HCG	3	0	0	原发不孕	0.63	＞24	31	女方因素	2	11.27	826	1.56	1	6.03	2.68	40	3	6	0.78	B	IVF	1	0	1	0	0	0	0	否	否	全胚冷冻
1689	1	C00015544	张金霞	≥35	43	1	刺激方案	1	300	＞10天	11	＞3000	3300	HCG	2	0	0	原发不孕	0.37	≤24	22.5	混合因素	2	10.58	774	0.59	0	6.03	2.68	40	4	5	0.87	B		0	0	0	0	0	0	0	是		未取到卵
1795	0	C00016318	刘养栓	≥35	49	3	拮抗剂方案	2	150	≤10天	9	≤3000	1350	HCG	9	2	2	继发不孕	0.89	≤24	23.4	女方因素	2	8.09	547	0.69	2	7.44	2.68	33	4	5	9.5	A	IVF	0	0	0	0	0	0	0	是		无可移植胚胎
2111	0	C00017379	刘养栓	≥35	49	4	刺激方案	1	150	≤10天	7	≤3000	1050	HCG	9	2	2	继发不孕	0.81	≤24	23.4	混合因素	1	14.77	452	0.63		7.44	2.68	33	4	5	10	A		0	0	0	0	0	0	0	是		未取卵
2177	0	C00015920	刘养栓	≥35	49	2	拮抗剂方案	2	225	≤10天	7	≤3000	1575	HCG	1	2	2	继发不孕	0.14	≤24	23.4	女方因素	1	7.03	312	0.65	1	7.44	2.68	33	4	5	8.9	A	IVF	0	0	0	0	0	0	0	是		无可移植胚胎
429	1	2017110281	于静	≥35	36	3	拮抗剂方案	2	312.5	≤10天	8	≤3000	2500	HCG	2	0	0	原发不孕	1.9	≤24	23.6	混合因素	6	5.47	931	0.7	6	8.93	2.69	41.75	2	10	11.3	A	ICSI	4	0	1	0	0	0	0	否	否	全胚冷冻
1619	1	2016110084	于静	≥35	35	1	降调节方案	3	425	≤10天	9	＞3000	3825	HCG	1	0	0	原发不孕	2.08	≤24	23.6	混合因素	2	9.43	951	0.44	4	8.93	2.69	41.75	2	10	11.5	A	ICSI	3	0	0	0	0	0	0	是		无可移植胚胎
2228	1	2018030212	于静	≥35	37	4	刺激方案	1	472.5	≤10天	10	＞3000	4725	双扳机	3	0	0	原发不孕	0.73	≤24	23.6	混合因素	1	6.34	169	0.71	3	8.93	2.69	41.75	4	6	8.9	A	ICSI	1	0	1	0	0	0	0	否	否	全胚冷冻
465	0	2017110007	赵传菊	＜35	33	1	降调节方案	3	237.5	＞10天	12	≤3000	2850	HCG	3	1	0	继发不孕	2.10	＞24	24.8	女方因素	6	1.43	1848	1.24	5	7.25	2.7	27.8	1	10	12	A	IVF	3	0	3	0	2	2	0	否	是	移植	已妊娠	临床妊娠	宫内妊娠	单胚胎停
404	0	C00009306	李梅梅	≥35	36	1	降调节方案	3	275	＞10天	12	＞3000	3300	HCG	1	1	0	继发不孕	2.99	＞24	28.8	女方因素	7	1.38	1278	1.14	6	7.18	2.71	25	2	13	1.42	A	IVF	3	0	2	0	2	2	0	否	是	移植	未妊娠
851	1	C00011171	李梅梅	≥35	37	2	刺激方案	1	421.875	≤10天	8	＞3000	3375	HCG	1	1	0	继发不孕	1.88	＞24	28.8	女方因素	5	4.47	1300	1.18	7	7.18	2.71	25	2	11	0.92	B	IVF	4	0	4	1	0	0	0	否	否	全胚冷冻
968	1	2018010194	魏倩倩	＜35	31	1	刺激方案	1	337.5	＞10天	12	＞3000	4050	HCG	3	1	1	继发不孕	2.21	≤24	19.1	男方因素	4	2.25	1390	0.67	6	8.84	2.71	70.1	1	12	6.2	A-B	ICSI	2	0	1	1	0	0	0	否	否	全胚冷冻
1653	1	C00012086	李邦洪	≥35	44	1	拮抗剂方案	2	345	≤10天	10	＞3000	3450	HCG	1	2	2	继发不孕	0.5	＞24	25	女方因素	2	9.77	854	0.64	2	7.82	2.71	48	4	7	1.31	A	IVF	1	0	0	0	0	0	0	是		无可移植胚胎
1714	0	C00015189	李邦洪	≥35	44	3	拮抗剂方案	2	284.615	＞10天	13	＞3000	3700	HCG	1	2	2	继发不孕	0.85	＞24	25	混合因素	2	16.58	722	0.78	0	7.82	2.71	48	4	5	12.1	A-B		0	0	0	0	0	0	0	是		未取到卵
1735	1	C00015595	李邦洪	≥35	45	4	刺激方案	1	375	≤10天	9	＞3000	3375	HCG	1	2	2	继发不孕	0.5	＞24	25	混合因素	2	7.35	667	0.73	2	7.82	2.71	48	4	7	10.6	A	ICSI	2	0	2	0	2	2	0	否	是	移植	未妊娠
504	1	C00017315	于英	≥35	46	2	刺激方案	1	300	≤10天	9	≤3000	2700	HCG	5	4	1	继发不孕	0.8	＞24	24.5	女方因素	6	9.6	2438	2.07	5	10.62	2.72	90	4	7	6.9	C	IVF	4	0	2	0	0	0	0	否	否	全胚冷冻
1188	0	C00003713	徐延雁	≥35	36	2	刺激方案	1	225	≤10天	7	≤3000	1575	HCG	6	0	0	原发不孕	1.6	＞24	31.2	女方因素	4	2.9	1109	0.39	4	4.77	2.72	39.09	2	7	14.9	A-B	IVF	4	0	0	0	0	0	0	是		无可移植胚胎
1349	1	2017120188	姜洪艳	≥35	35	1	刺激方案	1	300	≤10天	8	≤3000	2400	HCG	6	0	0	原发不孕	1.42	≤24	22.3	不明原因	3	10.2	592	1.12	4	7.53	2.72	65.76	2	6	5.5	B	IVF	1	0	2	0	0	0	0	否	否	全胚冷冻
1758	0	2016020134	郑加玉	≥35	37	2	刺激方案	1	225	≤10天	7	≤3000	1575	HCG	4	0	0	原发不孕	0.71	＞24	26.6	男方因素	2	4.86	614	0.7	3	9.78	2.72	53	4	4	7.3	B	ICSI	2	0	1	0	0	0	0	否	否	全胚冷冻
2022	1	C00013011	于英	≥35	46	1	刺激方案	1	450	≤10天	7	＞3000	3150	HCG	5	4	1	继发不孕	0.48	＞24	24.5	女方因素	1	14.86	744	0.63	1	10.62	2.72	90	4	2	0.53	B-C	IVF	0	0	0	0	0	0	0	是		无可移植胚胎
2089	0	2018050044	徐延雁	≥35	36	1	降调节方案	3	218.182	＞10天	11	≤3000	2400	HCG	6	0	0	原发不孕	1.65	＞24	31.2	女方因素	1	5.5	494	0.18	1	4.77	2.72	59.09	2	7	12.5	A-B	IVF	1	0	0	0	0	0	0	是		无可移植胚胎
2121	0	2017030169	郑加玉	≥35	38	4	拮抗剂方案	2	255	≤10天	5	≤3000	1275	HCG	5	0	0	原发不孕	1.52	＞24	26.6	男方因素	1	5.25	431	0.38	1	7.67	2.72	56.76	4	4	7.5	A	ICSI	1	0	1	0	0	0	0	否	否	全胚冷冻
236	0	2018040084	张瑛	＜35	34	1	降调节方案	3	234.615	＞10天	13	＞3000	3050	HCG	1	0	0	原发不孕	2.0	＞24	26.6	不明原因	8	1.18	1184	0.58	9	8.02	2.73	55.05	1	18	11.2		IVF	6	0	2	1	2	2	0	否	是	移植	已妊娠	临床妊娠	宫内妊娠	单胎宫内妊娠
627	0	C00016882	马瑛骏	＜35	32	1	拮抗剂方案	2	200	≤10天	7	≤3000	1400	HCG	4	0	0	原发不孕	1.9	≤24	22.6	女方因素	6	0.58	1157	0.77	7	6.19	2.73	34	1	25	15.3	A	IVF	3	2	3	0	1	1	0	否	是	移植	已妊娠	临床妊娠	宫内妊娠	单胎宫内妊娠
823	0	2016120180	李国英	≥35	38	1	降调节方案	3	150	≤10天	10	≤3000	1500	HCG	3	0	0	继发不孕	2.32	≤24	22	女方因素	5	0.64	1470	1.53	7	8.25	2.73	29.09	2	13	8.7	B	IVF	3	0	3	1	2	2	0	否	是	移植	未妊娠
1147	1	2016050269	李玉新	≥35	43	1	刺激方案	1	300	≤10天	9	≤3000	2700	HCG	5	3	1	继发不孕	4.49	＞24	34.2	女方因素	4	3.36	1290	0.3	5	6.97	2.73	76.43	2	6	9.2	A	IVF	2	0	2	0	2	2	0	否	是	移植	未妊娠
1589	1	C00012278	陈虹羽	≥35	39	1	刺激方案	1	300	≤10天	9	≤3000	2700	HCG	2	2	0	继发不孕	1.84	≤24	21.5	女方因素	3	2.78	1027	1.56	3	6.42	2.73	85	2	5	0.65	B	IVF	3	0	2	0	0	0	0	否	否	全胚冷冻
297	0	2018060204	庄会妹	＜35	30	3	刺激方案	1	225	≤10天	7	≤3000	1575	HCG	3	0	0	原发不孕	2.24	＞24	24.4	男方因素	7	6.92	2693	1.31	5	7.15	2.74	99.86	1	16	7.2	A	ICSI	4	0	0	0	0	0	0	是		无可移植胚胎
448	1	C00016733	孔宪玲	≥35	39	4	刺激方案	1	300	≤10天	9	≤3000	2700	HCG	2	1	1	继发不孕	1.80	≤24	23.5	混合因素	6	7.7	1800	1.25	5	9.57	2.74	54	2	10	4.3	B	ICSI	2	0	1	0	0	0	0	否	否	全胚冷冻
806	1	C00012180	王慧君	≥35	47	2	拮抗剂方案	2	346.875	≤10天	8	≤3000	2775	HCG	3	1	1	原发不孕	0.16	≤24	24	女方因素	5	6.29	1588	0.55	4	5.32	2.74	77	4	9	0.63	A	IVF	3	0	2	1	0	0	0	否	否	全胚冷冻
925	0	C00013032	王全英	≥35	42	1	拮抗剂方案	2	281.25	≤10天	8	≤3000	2250	HCG	1	1	1	继发不孕	0.44	＞24	28.2	女方因素	4	2.76	886	0.49	4	6.9	2.74	19.7	4	6	1.19	B	IVF	3	0	0	0	0	0	0	是		无可移植胚胎
1105	1	C00015561	王全英	≥35	42	2	刺激方案	1	300	＞10天	12	＞3000	3600	HCG	1	1	1	继发不孕	0.9	＞24	28.2	女方因素	4	11.73	1420	0.61	1	6.9	2.74	19.7	4	6	1.26	A-B	IVF	0	0	0	0	0	0	0	是		无可移植胚胎
2237	1	C00012200	孔宪玲	≥35	38	1	刺激方案	1	300	≤10天	8	≤3000	2400	HCG	1	1	1	继发不孕	0.3	≤24	23.5	混合因素	1	13.54	228	1.3	0	9.57	2.74	54	4	3	0.45	A-B		0	0	0	0	0	0	0	是		未取到卵
587	1	C00019022	王姝	≥35	38	1	拮抗剂方案	2	362.5	≤10天	8	≤3000	2900	HCG	2	2	0	继发不孕	1.29	＞24	24.5	女方因素	6	2.26	1594.82	1.42	7	6.08	2.76	40.2	2	10	7.5	A	IVF	7	0	3	1	1	1	0	否	是	移植	未妊娠
617	1	C00016186	刘文茹	＜35	28	4	刺激方案	1	300	≤10天	6	≤3000	1800	HCG	2	0	0	原发不孕	1.82	＞24	26.7	女方因素	6	7.53	1322	0.76	4	7.58	2.76	27	1	10	0.9	B-	IVF	4	0	2	0	0	0	0	否	否	全胚冷冻
751	0	C00011989	刘文茹	＜35	27	2	刺激方案	1	225	≤10天	7	≤3000	1575	HCG	2	0	0	原发不孕	1.41	＞24	26.7	女方因素	5	6.36	1398	0.78	3	7.58	2.76	27	1	10	1.1	B-C	IVF	3	0	2	0	0	0	0	否	否	全胚冷冻
1719	1	C00011039	刘文茹	＜35	26	1	刺激方案	1	450	≤10天	8	＞3000	3600	HCG	2	0	0	原发不孕	2.24	＞24	26.7	女方因素	2	9.17	714	0.54	1	7.58	2.76	27	1	10	8	B	IVF	0	0	0	0	0	0	0	是		无可移植胚胎
1751	0	C00018787	邓翠丹	＜35	34	1	拮抗剂方案	2	150	≤10天	7	≤3000	1050	HCG	3	2	0	继发不孕	0.16	≤24	22.9	女方因素	2	4.7	629.97	0.71	2	8.56	2.76	29.42	3	4	7.8	A-B	IVF	1	0	1	0	0	0	0	否	否	全胚冷冻
1791	0	2017030028	宋景华	≥35	50	3	刺激方案	1	225	≤10天	6	≤3000	1350	HCG	9	1	1	继发不孕	0.51	＞24	27	女方因素	2	5.86	557	0.78	2	6.09	2.76	43.77	4	2	4	B	IVF	0	0	0	0	0	0	0	是		无可移植胚胎
1807	1	C00012130	刘恩芳	≥35	42	1	拮抗剂方案	2	338.889	≤10天	9	＞3000	3050	HCG	1	4	0	继发不孕	0.560	≤24	20	女方因素	2	4.46	532	0.37	2	9.21	2.76	35	4	5	0.77	A	IVF	2	0	2	1	1	1	0	否	是	移植	已妊娠	临床妊娠	宫内妊娠	单胎宫内妊娠
1878	0	2016050205	宋景华	≥35	49	1	刺激方案	1	150	≤10天	9	≤3000	1350	HCG	9	1	1	继发不孕	0.54	＞24	28	女方因素	2	5.33	291	1.22	1	6.09	2.76	53.77	4	2	3	B	IVF	1	0	1	0	0	0	0	否	否	全胚冷冻
1919	1	2017050243	尹秀红	≥35	38	1	拮抗剂方案	2	332.143	≤10天	7	≤3000	2325	HCG	15	0	0	原发不孕	0.44	＞24	31	女方因素	2	4.16	484	0.91	1	6.08	2.76	40.2	4	2	13.1	A	IVF	0	0	0	0	0	0	0	是		未受精
46	1	2017100031	初文静	≥35	36	1	降调节方案	3	298.077	＞10天	13	＞3000	3875	HCG	1	0	0	原发不孕	3.19	≤24	20.4	女方因素	9	0.74	2057	0.96	7	6.59	2.77	66.43	2	15	12	A	IVF	6	0	2	1	2	2	0	否	是	移植	未妊娠
1752	1	C00008447	伊爽	≥35	37	2	刺激方案	1	375	≤10天	9	＞3000	3375	HCG	3	0	0	原发不孕	1.05	＞24	24.6	混合因素	2	12.68	626	0.22	2	14.94	2.77	10	4	4	0.72	A	ICSI	2	0	2	0	0	0	0	否	否	全胚冷冻
1823	0	C00003571	伊爽	≥35	37	1	刺激方案	1	200	≤10天	6	≤3000	1200	HCG	3	0	0	原发不孕	1.05	＞24	24.6	混合因素	2	9.66	506	0.42	2	14.94	2.77	10	4	4	6.5	A	ICSI	2	0	2	1	0	0	0	否	否	全胚冷冻
2186	1	2017030231	王莲芹	≥35	45	1	刺激方案	1	341.667	≤10天	9	＞3000	3075	HCG	5	5	1	继发不孕	0.62	＞24	24.8	女方因素	1	13.9	289	0.16		4.37	2.77	34.76	4	3	4.9	B		0	0	0	0	0	0	0	是		未取卵
50	1	2018070041	韩丽	≥35	36	2	刺激方案	1	450	＞10天	12	＞3000	5400	HCG	4	1	1	继发不孕	1.47	＞24	27.9	女方因素	9	3.79	2021	1.42	8	13.42	2.78	17	2	15			IVF	6	0	2	1	0	0	0	否	否	全胚冷冻
253	0	C00015950	周升花	≥35	50	4	拮抗剂方案	2	238.889	≤10天	9	≤3000	2150	HCG	4	2	1	继发不孕	0.38	≤24	23.3	女方因素	7	2.52	1556	1.33	5	6.47	2.78	49	4	4	11.9	B	IVF	3	0	2	1	2	2	0	否	是	移植	未妊娠
591	1	C00010660	张春梅	≥35	41	1	刺激方案	1	450	＞10天	12	＞3000	5400	HCG	3	2	1	继发不孕	1.26	≤24	23.4	女方因素	6	5.39	2207	2.18	7	11	2.78	43	2	9	0.7	A	IVF	7	0	6	3	0	0	0	否	否	全胚冷冻
836	0	C00011659	张萍	＜35	28	1	拮抗剂方案	2	150	≤10天	7	≤3000	1050	HCG	3	0	0	原发不孕	2.46	≤24	23.5	女方因素	5	2.7	1405	0.54	6	7.18	2.78	26.8	1	12	1.07	A	IVF	4	0	4	1	2	2	0	否	是	移植	已妊娠	临床妊娠	宫内妊娠	单胎宫内妊娠
845	1	2017100030	韩丽	＜35	34	1	降调节方案	3	339.706	＞10天	17	＞3000	5775	HCG	3	1	1	继发不孕	4.24	＞24	27.9	女方因素	5	1.76	1359	0.86	6	13.42	2.78	17	1	10	10	A	IVF	5	0	1	0	0	0	0	否	否	全胚冷冻
1256	0	C00017155	周升花	≥35	50	7	拮抗剂方案	2	275	≤10天	6	≤3000	1650	HCG	5	2	1	继发不孕	0.626	≤24	23.3	男方因素	3	2.99	903	0.49	2	6.47	2.78	49	4	4	10	A-B	ICSI	1	0	1	0	1	1	0	否	是	移植	未妊娠
1350	1	C00013423	周升花	≥35	49	2	拮抗剂方案	2	342.857	≤10天	7	≤3000	2400	HCG	4	1	1	继发不孕	0.54	≤24	23.3	男方因素	3	1.88	590	0.77	3	6.47	2.78	49	4	4	10	B	ICSI	3	0	0	0	0	0	0	是		无可移植胚胎
1984	0	C00010793	邱文	≥35	41	3	刺激方案	1	225	≤10天	9	≤3000	2025	HCG	3	5	1	继发不孕	1.8	＞24	28.7	女方因素	2	13.69	404	0.63	1	7.83	2.78	33	2	8	7.3	B	IVF	0	0	1	0	0	0	0	否	否	全胚冷冻
2146	0	C00016524	周升花	≥35	50	5	刺激方案	1	150	≤10天	7	≤3000	1050	双扳机	5	2	1	继发不孕	0.42	≤24	23.3	男方因素	1	5.43	377	0.76	1	6.47	2.78	49	4	4	6	B	ICSI	0	0	0	0	0	0	0	是		未受精
207	0	2017060101	王玉	＜35	32	1	降调节方案	3	150	≤10天	8	≤3000	1200	HCG	4	0	0	原发不孕	4.27	＞24	30	女方因素	8	5.44	1846	1.2	8	3.91	2.79	43	1	12	10.6	A	IVF	4	0	4	3	2	2	0	否	是	移植	已妊娠	临床妊娠	宫内妊娠	双胎宫内妊娠
462	0	2017030245	刘春红	≥35	35	1	降调节方案	3	225	＞10天	11	≤3000	2475	HCG	1	0	0	原发不孕	2.02	＞24	24.5	女方因素	6	8.13	1648	1.65	7	8.9	2.79	26	2	12	11	A-B	IVF	0	0	0	0	0	0	0	是		无可移植胚胎
1160	0	2017030208	田艳	≥35	38	1	降调节方案	3	273.214	＞10天	14	＞3000	3825	HCG	2	0	0	原发不孕	2.52	≤24	22.1	混合因素	4	1.08	1228	0.42	7	6.32	2.79	56	2	11	9.2	A	ICSI	4	0	2	0	2	2	0	否	是	移植	未妊娠
1523	0	C00011288	张艳艳	≥35	48	1	刺激方案	1	150	≤10天	6	≤3000	900	HCG	2	1	1	继发不孕	0.51	≤24	21.1	女方因素	3	12.08	819	0.67	2	12.96	2.79	81.1	4	3	0.91	A	IVF	2	0	2	1	0	0	0	否	否	全胚冷冻
1698	0	C00014131	张艳艳	≥35	48	2	刺激方案	1	150	≤10天	5	≤3000	750	HCG	2	1	1	继发不孕	0.91	≤24	21.1	女方因素	2	14.57	756	0.42	1	12.96	2.79	80.6	4	3	6.1		IVF	0	0	0	0	0	0	0	是		无可移植胚胎
4	0	2017070199	王娟	＜35	32	1	刺激方案	1	272.727	＞10天	11	≤3000	3000	HCG	3	0	0	原发不孕	2.98	＞24	29.4	女方因素	10	5.28	2420	1.76	7	8.03	2.8	11	1	10	8.5	B	IVF	6	0	2	1	0	0	0	否	否	全胚冷冻
63	0	2016090059	王丽	＜35	30	1	降调节方案	3	232.5	≤10天	10	≤3000	2325	HCG	3	0	0	原发不孕	2.92	≤24	24	女方因素	9	2.55	2640	2.86	5	7.05	2.8	43	1	15	2.8		IVF	3	0	2	0	0	0	0	否	否	全胚冷冻
202	1	C00012294	张燕	≥35	40	1	拮抗剂方案	2	375	≤10天	8	≤3000	3000	HCG	4	4	2	继发不孕	1.41	≤24	23.4	女方因素	8	2.71	1903	0.76	8	7.05	2.8	43	2	15	1.02	A	IVF	5	0	4	1	0	0	0	否	否	全胚冷冻
2180	0	C00005438	孔娟	≥35	38	1	刺激方案	1	150	≤10天	5	≤3000	750	HCG	1	2	0	继发不孕	2.26	≤24	22	女方因素	1	4.69	306	0.24	1	8.4	2.8	35	2	6	7.9	A-B	IVF	0	1	1	0	0	0	0	否	否	全胚冷冻
315	0	2017070189	孔秀荣	≥35	42	1	降调节方案	3	219.231	＞10天	13	≤3000	2850	HCG	2	3	1	继发不孕	1.53	＞24	25.4	女方因素	7	1.44	2227	0.55	6	8.86	2.81	44	2	8	13.1	B	IVF	4	0	2	1	2	2	0	否	是	移植	已妊娠	临床妊娠	宫内妊娠	单胎宫内妊娠
679	0	C00010170	李雪娜	≥35	36	1	降调节方案	3	200	≤10天	9	≤3000	1800	HCG	5	0	0	原发不孕	1.96	＞24	25.3	女方因素	5	1.51	1817	0.91	7	7.18	2.81	40	2	11	8.1		IVF	5	0	2	0	2	2	0	否	是	移植	未妊娠
1043	1	2016050016	王华晨	≥35	41	1	降调节方案	3	346.875	≤10天	8	≤3000	2775	HCG	1	5	1	继发不孕	0.44	＞24	26.6	女方因素	4	5.25	1781	0.9	2	7.18	2.81	40	4	3	6.4		IVF	2	0	2	1	0	0	0	否	否	全胚冷冻
834	0	2016060067	马艺珲	＜35	31	1	刺激方案	1	201.923	＞10天	13	≤3000	2625	HCG	3	0	0	原发不孕	1.89	＞24	26.6	不明原因	5	1.94	1418	1.26	4	9.95	2.82	45.42	1	9	12.1	B	IVF	2	0	2	0	2	2	0	否	是	移植	已妊娠	临床妊娠	宫内妊娠	双胎宫内妊娠
919	0	C00009941	潘玉阁	＜35	28	1	降调节方案	3	173.077	＞10天	13	≤3000	2250	HCG	3	0	0	原发不孕	3.25	＞24	25.7	女方因素	4	1.73	948	1.37	6	7.88	2.82	45	1	36	11	A	IVF	2	0	2	1	2	2	0	否	是	移植	未妊娠
1157	1	2016060063	邹燕	＜35	29	1	刺激方案	1	380	＞10天	15	＞3000	5700	HCG	1	2	0	继发不孕	2.27	＞24	24.8	女方因素	4	1.62	1234	0.84	6	8.57	2.82	62.39	1	11	10.5	A	IVF	5	0	2	0	0	0	0	否	否	全胚冷冻
1268	0	C00016913	胡延南	＜35	32	1	拮抗剂方案	2	225	≤10天	6	≤3000	1350	HCG	2	2	0	继发不孕	2.93	≤24	23.3	男方因素	3	2.92	876	0.51	4	9.71	2.82	79	1	7	8.7	A-B	ICSI	2	0	0	0	0	0	0	是		无可移植胚胎
469	1	2017060252	武珺	≥35	37	1	降调节方案	3	300	＞10天	12	＞3000	3600	HCG	9	3	1	继发不孕	2.27	≤24	22.6	女方因素	6	6.57	1824	0.84	6	5.07	2.83	30.1	2	14	13.4	A	IVF	4	0	4	1	0	0	0	否	否	全胚冷冻
544	1	C00008903	宫晓丽	＜35	30	2	降调节方案	3	375	＞10天	13	＞3000	4875	HCG	1	2	0	继发不孕	2.47	≤24	21.8	女方因素	6	2.47	1998	0.34	6	13.64	2.83	37	1	9	8.7	A-B	IVF	4	0	4	2	0	0	0	否	否	全胚冷冻
89	0	C00007399	于春梅	≥35	36	1	降调节方案	3	212.5	＞10天	12	≤3000	2550	HCG	7	2	0	继发不孕	2.37	＞24	44	男方因素	9	1.1	2082	0.13	8	6.83	2.84	19	2	44	11	A-B	IVF	4	0	4	2	2	2	0	否	是	移植	已妊娠	临床妊娠	宫内妊娠	单胚胎停
1055	1	2016010157	邵丽	＜35	33	3	刺激方案	1	375	≤10天	8	≤3000	3000	HCG	5	0	0	原发不孕	0.691	≤24	22	男方因素	4	4	1698	1.26	4	8.63	2.84	36.43	3	5	8.3	A	ICSI	2	0	2	0	2	2	0	否	是	移植	未妊娠
370	0	2017040148	牛青	＜35	25	1	降调节方案	3	218.75	＞10天	12	≤3000	2625	HCG	2	2	2	继发不孕	2.91	＞24	31.2	女方因素	9	1.12	1834	1.34	8	8.01	2.85	36.43	1	18	15.2	A	IVF	8	0	6	3	2	2	0	否	是	移植	已妊娠	临床妊娠	宫内妊娠	单胎宫内妊娠
444	0	2017060009	王淑华	≥35	45	1	刺激方案	1	225	≤10天	7	≤3000	1575	HCG	2	2	1	继发不孕	1.05	＞24	24.5	女方因素	6	8.85	1839	1.61	7	6.01	2.85	70	4	10	9.5	B	IVF	2	0	2	1	0	0	0	否	否	全胚冷冻
2116	1	C00012072	洪东霞	≥35	46	1	刺激方案	1	300	≤10天	4	≤3000	1200	HCG	4	3	0	继发不孕	0.91	≤24	21.3	女方因素	1	14.3	443	1.07	1	10.78	2.85	63	4	3	0.47	B	IVF	0	0	0	0	0	0	0	是		无可移植胚胎
198	1	2018060249	张文	≥35	37	1	刺激方案	1	352.5	≤10天	10	＞3000	3525	HCG	3	1	1	继发不孕	3.62	＞24	25.4	女方因素	8	7	1985	1.9	8	7.94	2.86	86.43	2	11	4.7	B	IVF	4	0	3	1	0	0	0	否	否	全胚冷冻
686	1	2017020034	王蕊	≥35	42	1	降调节方案	3	300	≤10天	9	≤3000	2700	HCG	1	2	1	继发不孕	1.12	≤24	23.4	女方因素	5	3.45	1786	1.7	5	9.58	2.86	69.73	4	6	10.8	A	IVF	3	0	1	0	1	1	0	否	是	移植	未妊娠
1749	0	2018010009	何卫青	≥35	39	1	拮抗剂方案	2	225	≤10天	6	≤3000	1350	HCG	1	2	1	继发不孕	1.94	＞24	30.9	女方因素	2	1.95	632	0.38	4	4.35	2.86	41	2	9	8.8	A	IVF	2	0	2	1	2	2	0	否	是	移植	已妊娠	临床妊娠	宫内妊娠	单胎宫内妊娠
1951	1	C00015957	厉艳艳	≥35	40	1	刺激方案	1	300	≤10天	8	≤3000	2400	HCG	5	1	1	继发不孕	1.5	＞24	24.8	女方因素	2	5.9	806	0.62	4	4.8	2.86	16	2	9	0.81	B	IVF	2	0	1	1	0	0	0	否	否	全胚冷冻
273	1	C00011557	乔锰	≥35	40	1	刺激方案	1	300	≤10天	9	≤3000	2700	HCG	4	2	1	继发不孕	1.44	≤24	23.9	女方因素	7	13.92	2170	0.75	6	6.9	2.87	46.84	2	11	0.69	B	IVF	3	0	4	0	0	0	0	否	否	全胚冷冻
537	1	C00009834	刘敏	＜35	28	3	刺激方案	1	450	≤10天	10	＞3000	4500	HCG	1	1	0	继发不孕	2.27	＞24	24.2	女方因素	6	6.88	2049	1.28	5	4.02	2.87	43.67	1	10	5.1	A-B	IVF	5	0	3	0	0	0	0	否	否	全胚冷冻
637	1	2018050183	刘敏	＜35	26	1	刺激方案	1	375	≤10天	7	≤3000	2625	HCG	1	0	0	原发不孕	3.86	＞24	24.2	女方因素	6	4.85	1268	0.65	5	4.02	2.87	34.78	1	14			IVF	2	0	2	0	0	0	0	否	否	全胚冷冻
651	0	2018020028	孙阳阳	≥35	36	1	降调节方案	3	286.364	＞10天	11	＞3000	3150	HCG	1	1	0	原发不孕	2.48	≤24	23.9	女方因素	5	0.61	1760	0.24	5	8.3	2.87	43.77	2	13	10	A	IVF	3	0	2	0	2	2	0	否	是	移植	已妊娠	临床妊娠	宫内妊娠	单胎宫内妊娠
998	1	2017050130	徐友芳	＜35	34	1	刺激方案	1	319.737	＞10天	19	＞3000	6075	HCG	2	3	1	继发不孕	1.56	≤24	21.4	女方因素	4	2.16	1294	1.02	4	5.97	2.87	59.09	1	6	8.3	A	IVF	2	0	2	0	2	2	0	否	是	移植	已妊娠	生化妊娠	生化妊娠	生化妊娠
1011	0	2017090271	徐友芳	≥35	35	2	刺激方案	1	150	≤10天	9	≤3000	1350	HCG	2	3	1	继发不孕	1.73	≤24	21.4	女方因素	4	25.16	1230	1.23	5	5.97	2.87	49.09	2	6	6	A	IVF	2	0	2	0	0	0	0	否	否	全胚冷冻
1111	1	C00008130	刘敏	＜35	28	2	刺激方案	1	375	≤10天	9	＞3000	3375	HCG	1	1	0	继发不孕	1.59	＞24	24.2	女方因素	4	8.2	1405	0.28	3	4.02	2.87	34.04	1	10	4.1	A	IVF	2	0	2	0	0	0	0	否	否	全胚冷冻
355	0	2017020110	石清	＜35	26	1	降调节方案	3	250	＞10天	14	＞3000	3500	HCG	2	2	1	继发不孕	1.634	＞24	24.4	女方因素	7	2.28	1826	1.16	8	3.62	2.88	68	1	11	6.2	B	IVF	5	0	4	1	0	0	0	否	否	全胚冷冻
1177	0	C00018791	张红雷	＜35	31	1	拮抗剂方案	2	225	＞10天	11	≤3000	2475	HCG	1	2	0	继发不孕	2.18	＞24	25.5	女方因素	4	5.29	1147.22	1.21	4	8.75	2.88	49	1	8	1.14	B	IVF	4	0	4	4	1	1	0	否	是	移植	未妊娠
1603	1	C00016603	刘雪娇	≥35	36	1	刺激方案	1	300	≤10天	9	≤3000	2700	HCG	6	0	0	原发不孕	1.67	≤24	18.4	女方因素	2	13.57	997.65	1.35	2	6.82	2.88	73	2	7	6.8	A-B	IVF	0	0	0	0	0	0	0	是		无可移植胚胎
2212	1	2018060016	焦念丰	≥35	48	2	拮抗剂方案	2	321.429	≤10天	7	≤3000	2250	双扳机	1	3	1	继发不孕	0.16	≤24	23.7	女方因素	1	3.58	236	0.61	0	13.03	2.88	52	4	3	7.8	A		0	0	0	0	0	0	0	是		未取到卵
126	1	2016060275	潘芹	≥35	40	1	降调节方案	3	413.636	＞10天	11	＞3000	4550	HCG	1	5	0	原发不孕	1.56	＞24	29	女方因素	8	0.15	1962	1.31	6	9.55	2.89	46	2	8	7.2	A	IVF	4	0	2	0	2	2	0	否	是	移植	未妊娠
789	1	2017050217	潘芹	≥35	41	2	降调节方案	3	416.667	≤10天	9	＞3000	3750	HCG	1	5	0	继发不孕	1.69	＞24	29	女方因素	5	0.93	1684	0.48	6	9.55	2.89	46	2	8	6.3	A	IVF	3	0	1	0	0	0	0	否	否	全胚冷冻
1097	1	2016090092	姜丽敏	≥35	36	1	降调节方案	3	375	≤10天	9	＞3000	3375	HCG	10	0	0	原发不孕	0.59	＞24	29.3	女方因素	4	5.41	1456	0.67	4	5.23	2.89	40	4	6			IVF	3	0	2	1	2	2	0	否	是	移植	未妊娠
153	1	2016110135	杨英	＜35	32	1	降调节方案	3	315	≤10天	10	＞3000	3150	HCG	5	0	0	原发不孕	3.18	＞24	35.1	混合因素	8	4.91	1895	1.11	6	7.9	2.9	40.37	1	13	11.2	A	ICSI	4	0	2	2	2	2	0	否	是	移植	未妊娠
531	0	2016060151	耿洁	≥35	41	3	刺激方案	1	285	≤10天	10	≤3000	2850	HCG	8	1	0	继发不孕	1.7	＞24	28.1	女方因素	6	5.25	2117	1.1	4	9.32	2.9	25	2	9	5.3	B	IVF	4	0	2	0	0	0	0	否	否	全胚冷冻
648	1	2016070217	刘玉玲	≥35	38	1	刺激方案	1	323.077	＞10天	13	＞3000	4200	HCG	2	2	1	继发不孕	2.48	＞24	24.7	混合因素	5	0.54	860	1.08	4	12.9	2.9	40.37	2	8	12	A	ICSI	2	0	2	0	2	2	0	否	是	移植	未妊娠
771	1	C00006146	吴桂杰	≥35	41	1	拮抗剂方案	2	350	＞10天	12	＞3000	4200	双扳机	3	1	1	继发不孕	1.38	≤24	24	女方因素	5	2.12	1800	2.11	6	5.42	2.9	56	2	13	13.7	A	IVF	4	0	4	2	0	0	0	否	否	全胚冷冻
1047	1	2017030271	许玲	≥35	42	1	拮抗剂方案	2	330	≤10天	10	＞3000	3300	HCG	3	0	0	原发不孕	0.39	≤24	20.4	女方因素	4	1.39	1753	0.62	4	12.9	2.9	40.37	4	6	11.2	B	IVF	3	0	2	0	0	0	0	否	否	全胚冷冻
1077	1	2017050005	耿洁	≥35	42	6	刺激方案	1	325	≤10天	7	≤3000	2275	HCG	8	1	0	继发不孕	1.95	＞24	28.1	男方因素	4	6.66	1561	0.62	2	9.32	2.9	25	2	9	4.7	A-B	ICSI	1	0	1	0	0	0	0	否	否	全胚冷冻
1120	1	2017090285	刘玉玲	≥35	39	4	刺激方案	1	400	≤10天	9	＞3000	3600	HCG	2	2	1	继发不孕	0.47	＞24	24.7	混合因素	4	8.18	1386	0.51	3	12.9	2.9	40.37	4	7	7.2	B-C	ICSI	3	0	1	0	0	0	0	否	否	全胚冷冻
1234	0	2017020062	刘玉玲	≥35	38	2	降调节方案	3	254.167	＞10天	12	＞3000	3050	HCG	2	2	1	继发不孕	1.40	＞24	24.7	混合因素	3	2.28	959	0.48	4	12.9	2.9	40.37	2	8	14	A	ICSI	4	0	2	0	2	2	0	否	是	移植	未妊娠
1294	1	C00005563	葛爱芹	≥35	47	1	刺激方案	1	330	≤10天	10	＞3000	3300	HCG	1	2	2	继发不孕	0.82	＞24	29.4	女方因素	3	3.07	788	0.33	3	12.9	2.9	40.37	4	6	15.9	B	IVF	3	0	2	0	0	0	0	否	否	全胚冷冻
1451	0	2017070188	刘玉玲	≥35	39	3	刺激方案	1	225	≤10天	9	≤3000	2025	HCG	2	2	1	继发不孕	1.32	＞24	24.7	混合因素	3	8.6	903	0.58	3	12.9	2.9	40.37	2	7	6.2	A-B	ICSI	3	0	2	0	0	0	0	否	否	全胚冷冻
1499	0	2016040177	耿洁	≥35	41	2	刺激方案	1	218.182	＞10天	11	≤3000	2400	HCG	8	1	0	继发不孕	0.98	＞24	28.1	女方因素	3	3.11	958	0.65	2	9.32	2.9	25	4	9	7.7	A-B	IVF	2	0	0	0	0	0	0	是		无可移植胚胎
1526	1	2016120202	耿洁	≥35	41	5	降调节方案	3	325	＞10天	12	＞3000	3900	HCG	8	1	0	继发不孕	1.7	＞24	28.1	女方因素	3	3.7	805	0.68	3	9.32	2.9	25	2	9	8.8	A	IVF	3	0	0	0	0	0	0	是		无可移植胚胎
1641	1	C00012123	严春玲	＜35	34	1	降调节方案	3	316.667	≤10天	6	≤3000	1900	HCG	6	0	0	原发不孕	1.46	≤24	20	女方因素	2	3.84	888	0.78	3	7.9	2.9	40.37	1	10	1.22		IVF	3	0	2	0	2	2	0	否	是	移植	已妊娠	临床妊娠	宫内妊娠	单胎宫内妊娠
1976	0	2016030189	耿洁	≥35	41	1	刺激方案	1	217.5	≤10天	10	≤3000	2175	双扳机	8	1	0	继发不孕	2.42	＞24	28.1	女方因素	2	7.92	435	0.69	4	9.32	2.9	25	2	9	5.8	A	IVF	3	0	1	0	0	0	0	否	否	全胚冷冻
2011	1	2017060129	熊巩莹	＜35	27	2	刺激方案	1	631.25	＞10天	12	＞3000	7575	HCG	4	1	0	继发不孕	0.29	＞24	27.1	女方因素	1	5.55	861	0.67	1	12.9	2.9	67.37	3	5	4.1	B	IVF	1	0	0	0	0	0	0	是		无可移植胚胎
2217	0	2017030161	殷炜炜	≥35	37	1	刺激方案	1	159.375	≤10天	8	≤3000	1275	HCG	4	1	1	继发不孕	0.89	≤24	23	女方因素	1	5.51	209	0.23	0	6.87	2.9	45.98	4	5	12.1	A		0	0	0	0	0	0	0	是		未取到卵
1843	1	2017100097	张伟	≥35	43	1	刺激方案	1	323.077	＞10天	13	＞3000	4200	HCG	2	3	2	继发不孕	0.73	＞24	28.2	女方因素	2	9.79	456	0.86	2	7.95	2.91	30.1	4	4	10.7	A	IVF	1	0	0	0	0	0	0	是		无可移植胚胎
580	1	2016070065	孙合春	≥35	37	3	刺激方案	1	300	＞10天	15	＞3000	4500	HCG	12	0	0	原发不孕	2.04	＞24	29	混合因素	6	0.6	1636	0.5	8	7.34	2.92	69.73	2	8	8.7	A	ICSI	4	0	2	0	0	0	0	否	否	全胚冷冻
688	0	2016030173	段续凤	＜35	26	2	降调节方案	3	279.167	＞10天	12	＞3000	3350	HCG	3	0	0	原发不孕	3.66	≤24	21.7	男方因素	5	1.65	1777	0.96	8	7.46	2.92	31	1	16	11.9	A	ICSI	0	0	0	0	0	0	0	是		无可移植胚胎
797	1	C00012359	董慧敏	＜35	33	2	刺激方案	1	300	≤10天	7	≤3000	2100	HCG	4	2	0	继发不孕	1.44	≤24	20.8	女方因素	5	13.26	1645	1.14	7	6.77	2.92	91.75	1	10	0.67	A	IVF	3	0	2	1	0	0	0	否	否	全胚冷冻
1108	1	2016030095	王崇芬	≥35	44	1	降调节方案	3	320.455	＞10天	11	＞3000	3525	HCG	3	3	1	原发不孕	0.07	＞24	25.8	混合因素	4	3.15	1412	0.65	0	17.83	2.92	81.75	4	2	9.5	A		0	0	0	0	0	0	0	是		未取到卵
1178	1	C00011469	董慧敏	＜35	33	1	拮抗剂方案	2	291.667	≤10天	9	≤3000	2625	HCG	4	2	0	继发不孕	2.81	≤24	20.8	女方因素	4	4.41	1143	0.72	5	6.77	2.92	52	1	11	10	A	IVF	2	0	0	0	0	0	0	是		无可移植胚胎
1259	0	C00018917	蔡秀群	≥35	39	2	拮抗剂方案	2	231.818	＞10天	11	≤3000	2550	HCG	1	2	2	继发不孕	1.41	＞24	25.6	女方因素	3	1.79	891.83	0.54	3	6.99	2.92	33	2	12	12	A	IVF	3	0	1	0	1	1	0	否	是	移植	未妊娠
1343	1	2016040153	孙合春	≥35	37	2	刺激方案	1	450	＞10天	12	＞3000	5400	HCG	12	0	0	原发不孕	4.49	≤24	20.1	混合因素	3	0.31	614	0.93	1	5.34	2.92	69.73	2	8	9	A-B	ICSI	1	0	1	1	0	0	0	否	否	全胚冷冻
977	0	2016110053	路娟	≥35	37	1	降调节方案	3	193.75	＞10天	12	≤3000	2325	HCG	13	2	0	继发不孕	1.620	＞24	24.9	女方因素	4	1.26	1361	1.31	7	9.25	2.93	65.42	2	18	11.7	A	IVF	1	0	0	0	0	0	0	是		无可移植胚胎
1340	0	2017080028	王夏	≥35	36	1	降调节方案	3	283.333	≤10天	9	≤3000	2550	HCG	2	0	0	原发不孕	1.48	≤24	22.1	女方因素	3	1.8	635	0.76	3	8.2	2.93	53.77	2	12	11.2	A	IVF	0	0	0	0	0	0	0	是		无可移植胚胎
586	0	C00016408	张怡	＜35	33	1	拮抗剂方案	2	200	≤10天	7	≤3000	1400	HCG	2	1	1	继发不孕	1.77	≤24	23.6	女方因素	6	2.67	1595	1.76	4	7.96	2.94	26.43	1	7	8.7	A	IVF	4	0	4	1	0	0	0	否	否	全胚冷冻
730	1	C00018879	商国荣	≥35	38	1	降调节方案	3	343.182	＞10天	11	＞3000	3775	HCG	4	0	0	原发不孕	2.35	≤24	18.8	女方因素	5	1.95	1505	1.06	4	10.63	2.94	41.76	2	8	12.4	A	IVF	2	0	1	0	1	1	0	否	是	移植	已妊娠	临床妊娠	宫内妊娠	单胚胎停
883	0	C00008583	韩培培	≥35	40	1	降调节方案	3	192.105	＞10天	19	＞3000	3650	HCG	1	2	1	继发不孕	1.99	≤24	24	男方因素	5	2.19	1116	0.14	5	6.19	2.94	18	2	14	1.73	A-B	ICSI	3	0	1	0	0	0	0	否	否	全胚冷冻
965	1	C00004076	杨凤	≥35	45	2	降调节方案	3	600	＞10天	12	＞3000	7200	HCG	1	1	1	继发不孕	1.03	＞24	24.4	混合因素	4	5.74	1398	1.54	3	11.26	2.94	95.42	4	4	9.4	A	ICSI	2	0	0	0	0	0	0	是		无可移植胚胎
1478	1	2018040190	杨凤	≥35	44	1	拮抗剂方案	2	466.071	＞10天	14	＞3000	6525	HCG	1	1	1	继发不孕	0.31	＞24	24.4	混合因素	3	1.51	877	1.33	3	11.26	2.94	95.42	4	4	9.8	A	ICSI	3	0	2	1	0	0	0	否	否	全胚冷冻
100	0	2018030231	张天天	＜35	27	1	降调节方案	3	212.5	＞10天	12	≤3000	2550	HCG	2	1	0	继发不孕	4.28	≤24	17.6	男方因素	9	0.5	1919	0.66	7	8.38	2.95	34.78	1	16	9.7	A-B	ICSI	3	0	2	0	2	2	0	否	是	移植	已妊娠	临床妊娠	宫内妊娠	单胎宫内妊娠
1446	0	2017090084	邹静静	≥35	43	4	刺激方案	1	225	≤10天	8	≤3000	1800	HCG	3	3	1	继发不孕	0.18	≤24	22.1	女方因素	3	6.76	910	0.91	5	9.39	2.95	25.69	4	5	7.7	B	IVF	2	0	2	2	0	0	0	否	否	全胚冷冻
1827	0	2016070054	邹静静	≥35	42	2	刺激方案	1	247.5	≤10天	10	≤3000	2475	HCG	3	3	1	继发不孕	0.36	≤24	22.1	女方因素	2	0.76	497	0.35	2	9.39	2.95	25.69	4	5	9.5		IVF	2	0	2	0	0	0	0	否	否	全胚冷冻
1948	1	2017020182	邹静静	≥35	42	3	刺激方案	1	300	≤10天	5	≤3000	1500	HCG	3	3	1	继发不孕	0.30	≤24	22.1	女方因素	2	2.49	510	1.63	2	9.39	2.95	25.69	4	5	12.2	B	IVF	1	0	1	1	0	0	0	否	否	全胚冷冻
2083	0	2016040155	邹静静	≥35	42	1	降调节方案	3	225	≤10天	7	≤3000	1575	HCG	3	3	1	继发不孕	0.905	≤24	22.1	女方因素	1	2.82	510	0.32	1	9.39	2.95	25.69	4	5	10	A-B	IVF	1	0	1	0	0	0	0	否	否	全胚冷冻
151	1	C00010160	屈倩倩	≥35	36	2	降调节方案	3	315.385	＞10天	13	＞3000	4100	HCG	6	0	0	原发不孕	2.14	＞24	26.4	女方因素	8	3.13	1955	1.58	6	5.38	2.96	52	2	13	10.5	A-B	IVF	5	0	2	0	0	0	0	否	否	全胚冷冻
1279	0	2017060128	房玉爱	≥35	38	1	降调节方案	3	150	≤10天	7	≤3000	1050	HCG	3	3	1	继发不孕	1.16	≤24	23.4	女方因素	3	5.91	852	0.08	3	12.05	2.96	38	4	7	15.8	A-B	IVF	3	0	3	3	2	2	0	否	是	移植	未妊娠
1335	0	2017070048	曹瑞平	＜35	30	1	降调节方案	3	195	≤10天	10	≤3000	1950	HCG	2	0	0	继发不孕	1.25	≤24	20.5	女方因素	3	1.97	641	0.52	3	8.54	2.96	77	1	8	10.4	A	IVF	0	0	0	0	0	0	0	是		无可移植胚胎
1385	0	2017110037	张彦芳	≥35	38	3	刺激方案	1	225	≤10天	8	≤3000	1800	HCG	3	2	0	继发不孕	0.56	≤24	23.3	女方因素	3	7.41	265	0.86	1	8.86	2.96	34.04	4	5	5.2	B	IVF	1	0	1	1	0	0	0	否	否	全胚冷冻
1866	0	2017040034	姜琰珺	≥35	42	2	刺激方案	1	150	≤10天	6	≤3000	900	HCG	7	0	0	原发不孕	0.92	＞24	28.5	不明原因	2	5.06	363	0.15	2	12.74	2.96	30	4	4	8.2	B	IVF	1	0	1	1	0	0	0	否	否	全胚冷冻
86	1	2017030311	付林林	＜35	27	1	降调节方案	3	323.684	＞10天	19	＞3000	6150	HCG	1	3	0	继发不孕	3.86	＞24	32	男方因素	9	2.19	2122	0.54	9	5.03	2.97	30.1	1	18	10	A-B	ICSI	7	0	2	0	2	2	0	否	是	移植	已妊娠	临床妊娠	宫内妊娠	双胎宫内妊娠
908	1	C00018217	乔玺睿	≥35	37	1	降调节方案	3	294.231	＞10天	13	＞3000	3825	HCG	3	0	0	原发不孕	2.89	＞24	28.3	女方因素	4	2.89	973.26	1.07	5	6.29	2.97	23.07	2	14	11.3	A	IVF	3	0	2	0	2	2	0	否	是	移植	未妊娠
1436	1	2015120109	王文秀	≥35	41	1	刺激方案	1	300	≤10天	7	≤3000	2100	HCG	2	2	1	继发不孕	1.77	＞24	29.7	混合因素	3	4.28	934.88	0.39	3	9.67	2.97	31.76	2	7	6.5	A-B	ICSI	2	0	1	0	0	0	0	否	否	全胚冷冻
61	1	C00012639	翟亚男	≥35	41	4	刺激方案	1	465	≤10天	10	＞3000	4650	HCG	6	0	0	原发不孕	1.93	≤24	20.9	混合因素	9	1.22	2717	1.67	8	8.84	2.98	64	2	15	1.2	A-B	ICSI	3	0	1	0	0	0	0	否	否	全胚冷冻
882	1	C00017395	宋欣香	≥35	39	1	降调节方案	3	347.222	≤10天	9	＞3000	3125	HCG	1	1	0	继发不孕	2.66	＞24	25.4	女方因素	5	2.69	1126	1.16	5	5.85	2.98	17	2	13	12.6	A	IVF	4	0	1	0	1	1	0	否	是	移植	未妊娠
959	1	C00011069	翟亚男	≥35	41	3	刺激方案	1	300	≤10天	10	≤3000	3000	HCG	6	0	0	原发不孕	2.66	≤24	20.9	混合因素	4	12.67	501	3.63	3	8.84	2.98	64	2	10	0.6	A-B	ICSI	2	0	1	0	0	0	0	否	否	全胚冷冻
1008	1	C00009736	翟亚男	≥35	40	2	刺激方案	1	300	≤10天	8	≤3000	2400	HCG	6	0	0	原发不孕	1.22	≤24	20.9	女方因素	4	11.79	1239	2.31	2	8.84	2.98	64	2	8	0.69	A-B	IVF	0	0	0	0	0	0	0	是		无可移植胚胎
1196	0	2016110014	王帆	＜35	31	1	刺激方案	1	225	≤10天	7	≤3000	1575	HCG	6	1	1	继发不孕	2.94	＞24	25.7	女方因素	4	10.13	1062	0.73	4	9.45	2.98	77	1	9	17.6	B	IVF	4	0	2	0	0	0	0	否	否	全胚冷冻
1272	1	C00018471	宋欣香	≥35	39	2	拮抗剂方案	2	350	≤10天	7	≤3000	2450	HCG	1	1	0	继发不孕	1.427	＞24	25.4	女方因素	3	4.09	866.61	1.43	2	5.85	2.98	17	2	13	14.5	2401	IVF	0	0	1	0	0	0	0	否	否	全胚冷冻
1348	1	2017090224	王帆	＜35	31	2	刺激方案	1	405	≤10天	5	≤3000	2025	HCG	6	1	1	继发不孕	2.47	＞24	25.7	女方因素	3	7.33	598	0.65	5	9.45	2.98	56	1	9	4.1	B	IVF	3	0	2	0	0	0	0	否	否	全胚冷冻
1611	0	C00016036	马丽丽	≥35	42	1	刺激方案	1	253.846	＞10天	13	＞3000	3300	HCG	4	3	1	继发不孕	0.76	≤24	20.2	混合因素	2	9.33	980	0.41	2	7.31	2.98	32.34	4	4	6.4	B-C	ICSI	0	0	0	0	0	0	0	是		无可移植胚胎
2178	0	C00005708	孔红霞	≥35	36	1	拮抗剂方案	2	180	≤10天	5	≤3000	900	双扳机	9	2	1	继发不孕	0.21	＞24	26	混合因素	1	3.24	308	0.28	1	9.3	2.98	41.75	4	5	9.4	A-B	ICSI	1	0	0	0	0	0	0	是		无可移植胚胎
772	0	C00011940	陈飞	≥35	35	1	拮抗剂方案	2	225	≤10天	8	≤3000	1800	HCG	6	0	0	原发不孕	2.49	≤24	18.3	女方因素	5	2.6	1796	0.82	6	9.89	2.99	76	2	10	1.3	A	IVF	5	0	4	0	2	2	0	否	是	移植	未妊娠
1060	1	2018070105	吕倩倩	＜35	34	2	刺激方案	1	375	≤10天	9	＞3000	3375	HCG	6	1	1	继发不孕	1.23	＞24	29.6	混合因素	4	9.49	1648	0.8	5	6.75	2.99	86.43	1	9	7.4	A-B	ICSI	2	0	2	2	0	0	0	否	否	全胚冷冻
2218	1	C00013242	韩金红	＜35	31	1	降调节方案	3	358.929	＞10天	14	＞3000	5025	HCG	3	0	0	原发不孕	0.28	＞24	27	女方因素	1	15.39	208	2.47		13	2.99	48	3	5	11.5	A-B		0	0	0	0	0	0	0	是		未取卵
1568	1	2016030074	李学松	＜35	32	1	降调节方案	3	321.429	≤10天	7	≤3000	2250	HCG	4	1	0	继发不孕	2.18	＞24	25.3	女方因素	3	7.75	1084	0.83	3	6.5	3	18	1	8	10.4	A-B	IVF	0	0	0	0	0	0	0	是		未受精
570	1	2017060060	李相峰	≥35	39	1	降调节方案	3	311.538	＞10天	13	＞3000	4050	HCG	3	2	1	原发不孕	1.33	≤24	20.5	女方因素	6	1.22	1761	1.04	5	4.77	3.01	55.05	2	11	14.1	A-B	IVF	2	0	2	1	0	0	0	否	否	全胚冷冻
1651	0	2017100124	李相峰	≥35	39	2	拮抗剂方案	2	250	≤10天	10	≤3000	2500	HCG	3	2	1	继发不孕	1.78	≤24	20.5	男方因素	2	1.59	862	0.14	7	4.77	3.01	55.05	2	11	13.4	A	ICSI	6	0	4	1	2	2	0	否	是	移植	未妊娠
1850	0	2016090191	张丽华	≥35	39	1	刺激方案	1	150	≤10天	8	≤3000	1200	HCG	2	2	1	继发不孕	0.94	＞24	28.3	混合因素	2	24.6	432	1.08		8.57	3.01	59	4	4	6	B		0	0	0	0	0	0	0	是		未取卵
2060	0	2017020035	张丽华	≥35	40	2	刺激方案	1	231.818	＞10天	11	≤3000	2550	HCG	3	2	1	继发不孕	0.32	＞24	28.3	混合因素	1	6.06	609	1.23	2	8.57	3.01	59	4	4	7.4	B	ICSI	2	0	2	1	0	0	0	否	否	全胚冷冻
129	0	C00013924	韩甜甜	＜35	29	1	拮抗剂方案	2	225	≤10天	6	≤3000	1350	HCG	6	0	0	原发不孕	2.15	＞24	30.9	混合因素	8	2.81	1909	0.42	6	7.74	3.02	23	1	12	0.97	A	ICSI	5	0	2	1	2	2	0	否	是	移植	已妊娠	临床妊娠	宫内妊娠	双胎宫内妊娠
304	1	2016080056	张金玲	＜35	30	1	刺激方案	1	346.154	＞10天	13	＞3000	4500	HCG	1	3	0	继发不孕	2.53	＞24	28	女方因素	7	1.98	2457	2.23	8	6.91	3.02	47.71	1	9	9	B	IVF	7	0	2	0	0	0	0	否	否	全胚冷冻
975	1	C00010545	杨文静	＜35	31	1	刺激方案	1	300	＞10天	11	＞3000	3300	HCG	4	0	0	原发不孕	2.4	≤24	22	女方因素	4	16.73	1363	1.48	4	7.82	3.02	91	1	8	0.63	C	IVF	1	0	3	0	0	0	0	否	否	全胚冷冻
1672	1	2017120121	朱红	≥35	48	1	拮抗剂方案	2	371.429	≤10天	7	≤3000	2600	HCG	2	2	1	继发不孕	0.36	＞24	26	男方因素	2	3.08	825	0.35	3	10.02	3.02	94	4	4	9.2	A	ICSI	2	0	1	0	1	1	0	否	是	移植	未妊娠
1767	0	C00009417	王昌燕	≥35	41	1	拮抗剂方案	2	150	≤10天	10	≤3000	1500	HCG	1	2	1	继发不孕	0.49	≤24	20.7	女方因素	2	3.03	603	0.46	3	11.1	3.02	33	4	7	9.6	A	IVF	3	0	3	1	2	2	0	否	是	移植	未妊娠
97	0	2017060175	赵爱萍	≥35	38	1	降调节方案	3	271.154	＞10天	13	＞3000	3525	HCG	2	1	1	继发不孕	1.55	≤24	21.9	女方因素	9	3.68	1936	1.73	9	7.25	3.03	37.66	2	11	16.9	B	IVF	7	0	3	1	0	0	0	否	否	全胚冷冻
360	1	2017080096	姜清清	＜35	30	1	降调节方案	3	315	＞10天	15	＞3000	4725	HCG	2	0	0	原发不孕	2.52	≤24	20.4	男方因素	7	1.98	1802	0.36	7	4.24	3.03	42	1	17	9.5	A	ICSI	3	0	2	0	2	2	0	否	是	移植	未妊娠
2163	0	C00019653	李春景	≥35	45	1	刺激方案	1	250	≤10天	7	≤3000	1750	双扳机	1	2	1	继发不孕	0.901	＞24	30.1	混合因素	1	15.66	337.39	1.06	0	12.46	3.03	64	4	2				0	0	0	0	0	0	0	是		未取到卵
285	1	C00004951	王红娟	≥35	44	1	刺激方案	1	436.364	＞10天	11	＞3000	4800	HCG	3	3	1	继发不孕	1.31	＞24	25	女方因素	7	19.15	2027	1.07	6	5.39	3.04	60.6	2	7	0.45	A-B	IVF	5	0	4	3	0	0	0	否	否	全胚冷冻
329	1	C00010240	王红娟	≥35	44	2	刺激方案	1	300	≤10天	9	≤3000	2700	HCG	3	3	1	继发不孕	0.34	＞24	25	女方因素	7	15.95	2087	2.5	7	5.39	3.04	60.6	4	7	0.42	B	IVF	2	0	3	2	0	0	0	否	否	全胚冷冻
191	1	2018020094	康苹	＜35	34	1	降调节方案	3	308.929	＞10天	14	＞3000	4325	HCG	2	2	1	继发不孕	1.23	≤24	22.8	女方因素	8	1.2	2122	0.75	7	8.55	3.05	50	1	10	13.3	A	IVF	2	0	3	0	1	1	0	否	是	移植	已妊娠	临床妊娠	宫外妊娠	异位妊娠
890	0	C00010664	李梅英	≥35	40	2	降调节方案	3	253.846	＞10天	13	＞3000	3300	HCG	9	3	0	继发不孕	1.83	＞24	27.6	混合因素	5	1.29	1086	0.33	4	7.05	3.05	22	2	9	9.8	A-B	ICSI	2	0	2	0	2	2	0	否	是	移植	未妊娠
1006	1	C00016897	王超男	≥35	35	1	降调节方案	3	300	＞10天	12	＞3000	3600	HCG	10	1	1	继发不孕	2.83	≤24	22.3	女方因素	4	4.98	1244	1.14	3	9.57	3.05	44	2	10	14.7	B	IVF	3	0	1	0	0	0	0	否	否	全胚冷冻
1861	0	C00006248	李慧	≥35	43	3	拮抗剂方案	2	187.5	≤10天	4	≤3000	750	双扳机	4	3	3	继发不孕	0.7	≤24	20.8	女方因素	2	4.53	376	0.49	1	9.57	3.05	44	4	4	7.9	A	IVF	1	0	1	0	0	0	0	否	否	全胚冷冻
1880	1	2016040057	吴士珍	≥35	48	1	降调节方案	3	326.786	≤10天	7	≤3000	2287.5	HCG	2	2	1	继发不孕	0.93	＞24	24.2	女方因素	2	3.73	629	1.21	4	8	3.05	91.75	4	5	9.6	B	IVF	1	0	0	0	0	0	0	是		无可移植胚胎
1902	1	C00016517	邹淑娟	≥35	44	1	刺激方案	1	300	＞10天	13	＞3000	3900	HCG	2	5	1	继发不孕	0.52	≤24	21	女方因素	2	7.35	516	0.97	1	10.76	3.05	21	4	6	0.58	B	IVF	1	0	1	0	0	0	0	否	否	全胚冷冻
1945	1	C00017992	邹淑娟	≥35	44	2	刺激方案	1	300	≤10天	9	≤3000	2700	HCG	2	5	1	继发不孕	0.32	≤24	21	女方因素	2	6.2	382	1.35	2	10.76	3.05	21	4	6	6.3	B	IVF	2	0	1	0	0	0	0	否	否	全胚冷冻
2258	1	2018010093	王春青	≥35	44	2	刺激方案	1	300	≤10天	9	≤3000	2700	HCG	3	5	1	继发不孕	1.54	≤24	23.4	不明原因	4	18.64	939	0.61	5	7.77	3.05	38	2	11			ICSI	4	0	2	0	0	0	0	否	否	全胚冷冻
36	1	C00010600	张淑平	≥35	38	2	拮抗剂方案	2	300	＞10天	16	＞3000	4800	双扳机	9	1	0	继发不孕	2.3	≤24	22	女方因素	9	0.17	2420	3.22	5	5.64	3.06	42.13	2	18	9.3	B	IVF	5	0	2	0	0	0	0	否	否	全胚冷冻
213	0	C00004415	王红	＜35	33	1	降调节方案	3	197.727	＞10天	11	≤3000	2175	HCG	2	2	0	继发不孕	2.3	≤24	20.8	女方因素	8	0.74	1729	0.68	4	5.83	3.06	44	1	16	7.2	A-B	IVF	4	0	4	3	2	2	0	否	是	移植	已妊娠	临床妊娠	宫外妊娠	异位妊娠
268	1	C00017196	邢芸	＜35	31	5	刺激方案	1	300	≤10天	9	≤3000	2700	HCG	3	1	1	继发不孕	3.1	≤24	21.5	男方因素	7	6.34	2304	1.12	6	8.2	3.06	41	1	12	5.3	A	ICSI	4	0	2	1	0	0	0	否	否	全胚冷冻
305	0	C00007633	国洪梅	＜35	31	1	降调节方案	3	225	≤10天	10	≤3000	2250	HCG	6	1	0	继发不孕	2.81	≤24	20	女方因素	7	1.15	2430	0.66	8	8.2	3.06	41	1	16	10.1	A	IVF	6	0	3	0	2	2	0	否	是	移植	已妊娠	临床妊娠	宫内妊娠	单胎宫内妊娠
311	0	C00004634	牛勤英	≥35	37	1	拮抗剂方案	2	247.5	≤10天	10	≤3000	2475	HCG	3	0	0	原发不孕	4.18	＞24	25.7	女方因素	7	2.43	2244	0.76	8	5.64	3.06	42.13	2	18	1.17	A-B	IVF	5	0	4	1	2	2	0	否	是	移植	已妊娠	临床妊娠	宫内妊娠	双胎宫内妊娠
374	0	C00015958	桑林林	＜35	34	2	降调节方案	3	218.75	＞10天	12	≤3000	2625	HCG	9	0	0	原发不孕	2.320	＞24	25	男方因素	7	2.63	1631	1.32	7	6.7	3.06	25.34	1	11	11	A	ICSI	5	0	2	0	2	2	0	否	是	移植	未妊娠
436	1	C00017185	王巍	≥35	38	1	拮抗剂方案	2	315	≤10天	10	＞3000	3150	HCG	7	1	0	继发不孕	2.80	＞24	26	混合因素	6	1.89	836.83	0.72	7	5.83	3.06	44	2	12	12.4	A-B	ICSI	5	0	3	0	0	0	0	否	否	全胚冷冻
495	1	2018060089	张巧玲	≥35	45	1	刺激方案	1	422.727	＞10天	11	＞3000	4650	HCG	3	10	1	继发不孕	0.73	≤24	21.6	女方因素	6	7.39	2512	1.7	6	9.4	3.06	91	4	7	6.4	B	IVF	3	0	2	1	0	0	0	否	否	全胚冷冻
700	1	2016050233	王吉焕	≥35	35	1	降调节方案	3	351.786	＞10天	14	＞3000	4925	HCG	2	0	0	原发不孕	2.68	≤24	21.3	不明原因	5	1.2	1687	1.08	8	7.31	3.06	34	2	12	12	A	IVF	6	0	2	0	2	2	0	否	是	移植	未妊娠
1040	1	2017030006	张玉玉	≥35	44	2	刺激方案	1	300	≤10天	9	≤3000	2700	HCG	8	1	1	继发不孕	1.13	≤24	21.7	女方因素	4	4.29	1109	0.7	5	14.6	3.06	66.06	4	6	9	A	IVF	2	0	1	0	0	0	0	否	否	全胚冷冻
1344	1	C00005111	张巧玲	≥35	46	2	刺激方案	1	383.333	≤10天	9	＞3000	3450	HCG	3	10	1	继发不孕	0.86	≤24	21.6	男方因素	3	9.39	614	1.62	4	9.4	3.06	41.75	4	7	3.4		ICSI	1	0	1	0	0	0	0	否	否	全胚冷冻
1479	1	C00011565	张巧玲	≥35	47	5	刺激方案	1	300	＞10天	12	＞3000	3600	HCG	3	10	1	继发不孕	0.54	≤24	21.6	男方因素	3	15.06	870	1.79	1	9.4	3.06	51.75	4	7	0.3		ICSI	2	0	1	0	0	0	0	否	否	全胚冷冻
2006	0	2017050109	张玉玉	≥35	45	3	刺激方案	1	150	≤10天	6	≤3000	900	HCG	8	1	1	继发不孕	0.98	≤24	21.7	女方因素	1	14.46	940	0.47	2	14.6	3.06	66.06	4	6	5.2	A	IVF	1	0	1	1	0	0	0	否	否	全胚冷冻
2045	0	C00012522	张巧玲	≥35	47	6	刺激方案	1	225	≤10天	9	≤3000	2025	HCG	3	10	1	继发不孕	0.26	≤24	21.6	女方因素	1	20.2	658	0.97	0	9.4	3.06	52	4	7	0.46	B-C		0	0	0	0	0	0	0	是		未取到卵
395	0	2018060073	耿兵	＜35	34	1	降调节方案	3	200	≤10天	10	≤3000	2000	HCG	1	1	0	继发不孕	2.29	≤24	24	女方因素	7	1.63	1391	1.5	6	5.83	3.07	40	1	16	12.2	A	IVF	4	0	4	2	0	0	0	否	否	全胚冷冻
2036	1	C00011580	卢凤	≥35	38	1	拮抗剂方案	2	342.857	≤10天	7	≤3000	2400	双扳机	2	3	1	继发不孕	1.3	≤24	21.3	女方因素	1	7.64	685	0.43	2	5.83	3.07	40	2	8	1	A	IVF	2	0	2	1	0	0	0	否	否	全胚冷冻
396	1	C00018832	刘宝玉	≥35	40	2	刺激方案	1	340.909	＞10天	11	＞3000	3750	HCG	7	1	0	继发不孕	2.12	＞24	25	男方因素	7	0.53	1378.84	1.19	8	8.35	3.08	28	2	14	9.9	A-B	ICSI	4	0	2	0	2	2	0	否	是	移植	未妊娠
499	0	2016100217	万冷冷	＜35	33	2	降调节方案	3	165.556	≤10天	9	≤3000	1490	HCG	12	0	0	原发不孕	2.27	≤24	21.1	男方因素	6	7.44	2492	1.22	7	7.38	3.08	44	1	9	11.3	A	ICSI	6	0	2	0	2	2	0	否	是	移植	未妊娠
889	1	C00012679	张红	≥35	41	1	刺激方案	1	400	≤10天	6	≤3000	2400	HCG	5	3	1	继发不孕	1.38	＞24	26.4	女方因素	5	2.83	1088	0.31	4	5.34	3.08	66	2	8	0.8	A	IVF	3	0	3	0	2	2	0	否	是	移植	未妊娠
1118	0	C00018283	孙俊凡	≥35	37	1	拮抗剂方案	2	288.889	≤10天	9	≤3000	2600	HCG	2	2	0	继发不孕	1.9	≤24	22	女方因素	4	1.31	1388.07	0.89	4	8.2	3.08	37.07	2	11	6.4	A-B	IVF	2	0	1	0	0	0	0	否	否	全胚冷冻
1434	0	2016060099	万冷冷	＜35	32	1	降调节方案	3	251.923	＞10天	13	＞3000	3275	HCG	12	0	0	原发不孕	1.61	≤24	21.1	女方因素	3	3.11	942	1.03	6	7.38	3.08	56.76	1	9	14.5	A	IVF	5	0	0	0	0	0	0	是		无可移植胚胎
1680	0	C00018665	孙俊凡	≥35	37	2	拮抗剂方案	2	281.25	≤10天	8	≤3000	2250	HCG	2	2	0	继发不孕	1.44	≤24	22	男方因素	2	1.16	794.03	0.6	3	8.2	3.08	37.07	2	11	3.7	B	ICSI	0	0	0	0	0	0	0	是		无可移植胚胎
2142	1	2016050094	于艳艳	＜35	33	1	刺激方案	1	300	＞10天	12	＞3000	3600	HCG	3	2	1	继发不孕	0.98	≤24	21.7	女方因素	1	19.69	384	0.97	0	16.78	3.09	34.5	3	7	7.6	B		0	0	0	0	0	0	0	是		未取到卵
2154	0	2017020105	袁建青	≥35	42	1	刺激方案	1	150	≤10天	5	≤3000	750	HCG	4	1	1	继发不孕	0.76	＞24	24.4	混合因素	1	20.83	358	1.33		9.42	3.09	56	4	3	10.9	A		0	0	0	0	0	0	0	是		未取卵
947	0	C00015451	王广菊	≥35	45	1	拮抗剂方案	2	225	≤10天	10	≤3000	2250	HCG	2	2	2	继发不孕	0.97	＞24	27.6	女方因素	4	3.66	730	0.53	4	13.8	3.1	32	4	9	0.93	A	IVF	4	1	2	0	1	1	0	否	是	移植	未妊娠
1070	1	C00012310	李延华	≥35	39	2	拮抗剂方案	2	305.556	≤10天	9	≤3000	2750	双扳机	12	1	1	继发不孕	3.47	≤24	21.9	混合因素	4	3.48	1574	1.24	3	5.8	3.1	68	2	10	12.6	B	ICSI	3	0	3	1	2	2	0	否	是	移植	未妊娠
1080	1	C00016430	刘议璐	＜35	30	1	刺激方案	1	300	≤10天	6	≤3000	1800	HCG	4	0	0	原发不孕	0.54	≤24	22	女方因素	4	8.82	1541	0.68	1	4.79	3.1	35.73	3	6	6.2	A-B	IVF	1	0	1	1	0	0	0	否	否	全胚冷冻
1103	1	C00010576	李延华	≥35	38	1	降调节方案	3	306.25	＞10天	12	＞3000	3675	HCG	12	1	1	继发不孕	2.63	≤24	21.9	混合因素	4	1.4	1427	0.46	5	5.8	3.1	68	2	7	16	B	ICSI	5	0	1	1	0	0	0	否	否	全胚冷冻
1119	0	2017020160	张红梅	≥35	35	1	降调节方案	3	267.857	＞10天	14	＞3000	3750	HCG	3	2	0	继发不孕	2.15	＞24	29.9	女方因素	4	0.63	1386	1.1	4	14.88	3.1	47.71	2	9	12.2	A	IVF	2	0	1	0	1	1	0	否	是	移植	已妊娠	临床妊娠	宫内妊娠	单胎宫内妊娠
1676	1	2018070088	刘丽丽	≥35	36	2	刺激方案	1	375	≤10天	9	＞3000	3375	HCG	4	1	0	继发不孕	0.44	≤24	19.5	女方因素	2	20.39	815	2.78	2	7.8	3.1	35	4	6	10.9	B	IVF	2	0	2	0	0	0	0	否	否	全胚冷冻
254	0	2016110039	潘玉秋	＜35	31	1	降调节方案	3	250	＞10天	12	≤3000	3000	HCG	3	2	0	继发不孕	3.41	＞24	25	女方因素	7	1.67	1733	0.81	7	8.54	3.11	57	1	17	10	A	IVF	6	0	4	2	2	2	0	否	是	移植	未妊娠
383	0	2017090229	张仕红	≥35	35	3	降调节方案	3	195	≤10天	10	≤3000	1950	HCG	2	3	1	继发不孕	4.26	≤24	19.6	女方因素	7	3.29	1584	0.79	6	5.41	3.11	39.09	2	12	8.9	A	IVF	2	0	2	1	2	2	0	否	是	移植	已妊娠	临床妊娠	宫内妊娠	单胎宫内妊娠
549	0	2017050219	潘玉秋	＜35	31	2	降调节方案	3	150	≤10天	10	≤3000	1500	HCG	3	2	0	继发不孕	3.71	＞24	25	女方因素	7	0.72	1213	0.4	6	8.54	3.11	57	1	17	9.2	A	IVF	6	0	6	3	2	2	0	否	是	移植	已妊娠	临床妊娠	宫外妊娠	异位妊娠
1818	0	2016060118	张秀红	≥35	37	3	拮抗剂方案	2	225	≤10天	8	≤3000	1800	HCG	5	3	1	继发不孕	1.05	＞24	24.8	不明原因	2	0.82	511	3.98	2	12.37	3.11	91.75	4	6	9.7	B	IVF	1	0	2	0	0	0	0	否	否	全胚冷冻
2034	1	2016060159	范桂秀	≥35	36	4	刺激方案	1	390	＞10天	15	＞3000	5850	HCG	4	1	1	继发不孕	1.07	＞24	31.2	女方因素	1	6.22	690	0.94	1	9.67	3.11	41.75	4	5	8.1	B	IVF	0	0	0	0	0	0	0	是		未受精
2170	1	2016110192	范桂秀	≥35	36	5	刺激方案	1	450	≤10天	6	≤3000	2700	HCG	4	1	1	继发不孕	0.7	＞24	31.2	男方因素	1	4.12	323	1.07	1	8.59	3.11	91	4	5	10.4	A	ICSI	0	0	0	0	0	0	0	是		未受精
432	0	C00007820	王燕	≥35	42	1	降调节方案	3	212.5	＞10天	14	≤3000	2975	HCG	2	3	1	继发不孕	2.58	＞24	24.8	女方因素	6	1.98	865	0.9	6	8.48	3.12	10	2	9	1.25	A	IVF	4	0	3	2	2	2	0	否	是	移植	已妊娠	临床妊娠	宫内妊娠	单胎宫内妊娠
551	0	2018010023	徐莹莹	＜35	31	1	降调节方案	3	187.5	≤10天	10	≤3000	1875	HCG	3	0	0	继发不孕	1.53	≤24	23.7	女方因素	6	1.34	1897	0.39	4	6.41	3.12	38.08	1	9	9.3	B	IVF	3	0	2	1	2	2	0	否	是	移植	已妊娠	临床妊娠	宫内妊娠	单胚胎停
667	0	2016050154	张谩谩	＜35	27	1	降调节方案	3	239.286	＞10天	14	＞3000	3350	HCG	4	0	0	原发不孕	4.25	≤24	22.2	女方因素	5	1.21	1431	1.57	6	5.29	3.12	63	1	10	11.2	B	IVF	0	0	0	0	0	0	0	是		未受精
991	1	C00016925	王秋菊	≥35	40	1	刺激方案	1	300	＞10天	11	＞3000	3300	HCG	2	0	0	原发不孕	1.83	＞24	26.2	女方因素	4	5.09	1313	2.05	4	6.85	3.12	32	2	9	10.3	A-B	IVF	2	0	2	0	0	0	0	否	否	全胚冷冻
1703	0	C00011535	武文波	≥35	45	7	拮抗剂方案	2	196.154	＞10天	13	≤3000	2550	HCG	1	5	0	继发不孕	0.74	≤24	22.7	男方因素	2	5.67	748	0.7	1	10.54	3.14	48	4	3	0.56	A	ICSI	1	0	0	0	1	1	0	否	是	移植	未妊娠
1741	0	C00010489	武文波	≥35	44	6	刺激方案	1	195	≤10天	5	≤3000	975	HCG	1	5	0	继发不孕	0.23	≤24	22.7	男方因素	2	5.16	648	0.16	2	10.54	3.14	48	4	3	6.3	A	ICSI	2	0	1	0	1	1	0	否	是	移植	未妊娠
530	1	2018050058	于聪灵	≥35	40	1	刺激方案	1	415.909	＞10天	11	＞3000	4575	HCG	2	2	1	继发不孕	1.95	＞24	24.4	不明原因	6	9.28	2129	2.01	4	7.32	3.15	45.76	2	9	5.8	A	IVF	3	0	1	0	0	0	0	否	否	全胚冷冻
574	1	2018070002	王兆霞	≥35	39	2	刺激方案	1	450	≤10天	9	＞3000	4050	HCG	3	2	1	继发不孕	1.2	＞24	37.3	女方因素	6	4.91	1722	0.66	2	7.49	3.15	80.6	2	9	6.2	B-C	IVF	1	0	0	0	0	0	0	是		无可移植胚胎
835	1	2017100037	王兆霞	≥35	38	1	降调节方案	3	300	＞10天	12	＞3000	3600	HCG	3	2	1	继发不孕	2.1	＞24	37.3	女方因素	5	1.26	1416	0.69	1	7.49	3.15	52	2	9	8	B	IVF	1	0	1	0	1	1	0	否	是	移植	未妊娠
997	0	2016110274	范维红	≥35	43	1	刺激方案	1	283.333	≤10天	9	≤3000	2550	HCG	15	0	0	原发不孕	0.52	≤24	22.2	女方因素	4	5.34	1297	1.41	1	7.87	3.15	60	4	3	10.9	A-B	IVF	0	0	0	0	0	0	0	是		无可移植胚胎
1247	1	C00007325	王燕	≥35	39	1	拮抗剂方案	2	450	≤10天	7	＞3000	3150	HCG	3	2	1	继发不孕	2.64	＞24	25.2	混合因素	3	5.08	913	0.58	4	10.1	3.15	49	2	8	10.2	A	ICSI	1	0	1	0	1	1	0	否	是	移植	未妊娠
1825	0	2018050166	房燕	≥35	45	4	刺激方案	1	150	≤10天	8	≤3000	1200	HCG	1	3	1	继发不孕	1.2	≤24	24	女方因素	2	19.45	502	0.38	2	8.2	3.15	43.36	2	10	9	A	IVF	2	0	0	0	0	0	0	是		无可移植胚胎
1863	0	2018030299	王美萍	≥35	42	1	刺激方案	1	193.75	＞10天	12	≤3000	2325	HCG	2	2	1	继发不孕	0.16	＞24	27.3	女方因素	2	1.45	370	0.14	2	8.9	3.15	73.77	4	4	9.1	A	IVF	0	0	0	0	0	0	0	是		无可移植胚胎
2202	0	C00004998	高成霞	≥35	36	1	刺激方案	1	162.5	≤10天	6	≤3000	975	HCG	1	3	1	继发不孕	1.66	＞24	25.7	女方因素	1	11.11	256	0.39	1	9.12	3.15	70.1	4	4	3.5		IVF	1	0	1	1	0	0	0	否	否	全胚冷冻
184	0	2016020004	叶红	≥35	38	1	降调节方案	3	150	＞10天	12	≤3000	1800	HCG	2	4	1	继发不孕	2.58	＞24	31.6	女方因素	8	3.32	2255	0.61	7	6.98	3.16	46	2	12	14.2	A	IVF	6	0	2	1	2	2	0	否	是	移植	已妊娠	临床妊娠	宫内妊娠	单胎宫内妊娠
73	1	2018030271	王小燕	≥35	35	1	降调节方案	3	356.25	＞10天	12	＞3000	4275	HCG	3	1	1	继发不孕	1.6	＞24	28.8	女方因素	9	1.16	2426	0.51	8	7.52	3.17	23	2	11	10.6	A-B	IVF	4	0	4	0	0	0	0	否	否	全胚冷冻
561	0	2017030163	费文霞	＜35	29	1	降调节方案	3	141.667	≤10天	9	≤3000	1275	HCG	2	0	0	原发不孕	2.56	≤24	21.2	女方因素	6	0.4	1835	1.5	8	5.63	3.17	41.75	1	15	11.7	A-B	IVF	4	0	2	1	0	0	0	否	否	全胚冷冻
800	0	2016080023	李宁	≥35	45	1	刺激方案	1	272.368	＞10天	19	＞3000	5175	HCG	1	0	0	继发不孕	0.81	≤24	22.6	女方因素	5	2.22	1624	1.99	4	5.71	3.17	50.1	4	5	8.2	A-B	IVF	3	0	2	0	0	0	0	否	否	全胚冷冻
1320	0	2017100084	柳兆荣	＜35	32	2	降调节方案	3	277.5	≤10天	10	≤3000	2775	HCG	1	2	1	继发不孕	2.32	≤24	22.5	女方因素	3	0.5	693	0.26	2	11.54	3.17	38	1	8	9	A	IVF	1	0	0	0	0	0	0	是		无可移植胚胎
1405	1	2016040183	刘宝桂	≥35	44	1	降调节方案	3	396.429	＞10天	14	＞3000	5550	HCG	12	1	1	继发不孕	0.86	＞24	24.4	女方因素	3	2.96	876	1	2	8.84	3.17	54	4	7	15.6	A-B	IVF	1	0	1	0	0	0	0	否	否	全胚冷冻
964	0	2017060071	陈春梅	≥35	37	1	刺激方案	1	225	≤10天	10	≤3000	2250	HCG	3	3	2	继发不孕	3.18	＞24	25.1	女方因素	4	14.73	1404	2.45	5	7.27	3.18	42.05	2	8	8	A	IVF	4	0	2	0	0	0	0	否	否	全胚冷冻
1215	1	2016030152	刘艳丽	＜35	33	2	刺激方案	1	311.538	＞10天	13	＞3000	4050	HCG	5	2	1	原发不孕	2.19	＞24	32.4	女方因素	4	8.98	1149	1.09	4	5.3	3.19	41.75	1	10	16.7	A-B	IVF	4	0	2	0	2	2	0	否	是	移植	已妊娠	临床妊娠	宫内妊娠	单胚胎停
117	0	C00010697	王慧	＜35	23	1	降调节方案	3	225	＞10天	11	≤3000	2475	HCG	3	1	0	继发不孕	2.97	≤24	23.7	女方因素	9	1.68	1532	0.36	7	5.96	3.2	22	1	25	0.88	A-B	IVF	3	2	4	0	2	2	0	否	是	移植	已妊娠	临床妊娠	宫内妊娠	双胎宫内妊娠
204	1	2018020037	徐银芳	≥35	42	1	降调节方案	3	381.818	＞10天	11	＞3000	4200	HCG	2	0	0	原发不孕	1.89	≤24	21.6	女方因素	8	0.85	1870	1.23	8	8.5	3.2	50	2	12	1.14	A	IVF	3	2	2	0	0	0	0	否	否	全胚冷冻
647	0	2016120085	杨春红	≥35	38	1	降调节方案	3	275	≤10天	8	≤3000	2200	HCG	6	1	1	继发不孕	2.09	≤24	23.8	女方因素	5	0.84	861	1.37	5	7.76	3.2	39.09	2	13	18.7	C	IVF	3	0	3	2	0	0	0	否	否	全胚冷冻
660	0	2016120219	潘玉红	≥35	43	2	刺激方案	1	150	≤10天	10	≤3000	1500	HCG	1	2	1	继发不孕	2.02	＞24	27	男方因素	5	7.55	1458	1.88	4	5.3	3.2	21	2	7	7	B	ICSI	2	0	2	0	0	0	0	否	否	全胚冷冻
774	0	2016050125	潘玉红	≥35	42	1	刺激方案	1	262.5	≤10天	8	≤3000	2100	HCG	1	2	1	继发不孕	0.22	＞24	30	女方因素	5	4.68	1786	1.47	4	5.3	3.2	21	4	7			IVF	0	0	0	0	0	0	0	是		未受精
933	1	C00003409	马春燕	≥35	40	2	刺激方案	1	418.75	＞10天	12	＞3000	5025	HCG	2	2	1	继发不孕	0.865	＞24	27.5	女方因素	4	13.56	854	2.55	3	8.66	3.2	48.08	4	7	4.6	A	IVF	0	0	0	0	0	0	0	是		无可移植胚胎
1172	1	2016060084	商伟伟	＜35	30	1	降调节方案	3	342.308	＞10天	13	＞3000	4450	HCG	2	1	0	继发不孕	1.68	≤24	20.4	女方因素	4	1.69	1178	0.54	5	6.3	3.2	24	1	8	11.7	A	IVF	5	0	4	1	2	2	0	否	是	移植	未妊娠
1803	0	C00015607	任成凤	＜35	28	1	拮抗剂方案	2	187.5	≤10天	10	≤3000	1875	双扳机	1	4	0	继发不孕	1.96	＞24	25.6	女方因素	2	5.97	535	0.69	3	10.82	3.2	67	1	6	11.8	A	IVF	2	0	0	0	0	0	0	是		无可移植胚胎
2130	0	C00008580	肖熙越	＜35	32	1	拮抗剂方案	2	150	≤10天	9	≤3000	1350	双扳机	3	0	0	继发不孕	1.31	≤24	20.2	混合因素	1	20.05	415	0.43		13.67	3.2	26	1	12	8.2	A-B		0	0	0	0	0	0	0	是		未取卵
293	1	2018040253	苏海燕	＜35	30	1	降调节方案	3	360	＞10天	15	＞3000	5400	HCG	2	1	0	继发不孕	2.55	＞24	26.8	女方因素	10	1.59	2886	0.64	8	7.9	3.21	47.71	1	14	15.2	A	IVF	6	0	6	2	0	0	0	否	否	全胚冷冻
670	1	2016090142	张慧	≥35	35	1	降调节方案	3	375	≤10天	10	＞3000	3750	HCG	4	0	0	原发不孕	0.48	＞24	27.8	男方因素	5	9.37	1354	1.86	2	7.35	3.21	80.1	4	5	9	A-B	ICSI	2	0	2	0	0	0	0	否	否	全胚冷冻
773	1	2017050225	张慧	≥35	35	3	降调节方案	3	412.5	≤10天	8	＞3000	3300	HCG	4	0	0	原发不孕	0.86	＞24	27.8	男方因素	5	1.59	1790	1.8	5	7.35	3.21	29.6	4	6	8.9	A	ICSI	4	0	4	2	2	2	0	否	是	移植	已妊娠	临床妊娠	宫内妊娠	单胎宫内妊娠
1029	0	2016110011	郭英霞	≥35	40	1	拮抗剂方案	2	289.286	＞10天	14	＞3000	4050	HCG	1	2	1	继发不孕	1.45	＞24	30.8	女方因素	4	0.92	1147.22	1.53	6	6.61	3.21	29.09	2	11	8.3	A	IVF	4	0	0	0	0	0	0	是		无可移植胚胎
1035	1	C00012704	贾金红	≥35	43	1	刺激方案	1	330	≤10天	10	＞3000	3300	HCG	1	3	1	继发不孕	0.56	＞24	27.3	女方因素	4	4.15	1123	0.99	5	8.98	3.21	41	4	7	1.31	A-B	IVF	3	0	2	0	2	2	0	否	是	移植	未妊娠
1110	1	C00016836	张淑华	≥35	35	2	刺激方案	1	450	≤10天	8	＞3000	3600	HCG	3	1	1	继发不孕	3.03	≤24	23	女方因素	4	10.61	1405	0.59	4	10.18	3.21	58	2	8	0.55	A	IVF	4	0	4	2	0	0	0	否	否	全胚冷冻
1453	0	2017020073	郑妮	＜35	33	1	降调节方案	3	168.75	≤10天	8	≤3000	1350	HCG	2	2	1	继发不孕	3.37	＞24	24.4	女方因素	3	0.87	897	0.54	5	9.3	3.21	26.43	1	12	9	A-B	IVF	5	0	3	2	2	2	0	否	是	移植	未妊娠
1647	1	C00011870	王海敬	＜35	34	1	刺激方案	1	300	≤10天	10	≤3000	3000	HCG	7	1	1	继发不孕	0.23	≤24	18.8	女方因素	2	24.32	868	0.71	1	11.19	3.21	10	3	4	0.48	A-B	IVF	1	0	1	0	0	0	0	否	否	全胚冷冻
1669	1	C00019331	王海敬	≥35	36	7	刺激方案	1	300	≤10天	9	≤3000	2700	HCG	7	1	1	继发不孕	0.23	≤24	18.8	女方因素	2	21.75	829.57	1.29	1	11.19	3.21	10	4	4	5.3	B	IVF	1	0	1	0	0	0	0	否	否	全胚冷冻
1695	1	C00015741	王海敬	≥35	35	3	刺激方案	1	300	≤10天	6	≤3000	1800	HCG	7	1	1	继发不孕	0.23	≤24	18.8	女方因素	2	8.86	761	0.35	2	11.19	3.21	10	4	4	0.3		IVF	2	0	2	0	0	0	0	否	否	全胚冷冻
1900	1	2016120090	张慧	≥35	35	2	降调节方案	3	437.5	≤10天	8	＞3000	3500	HCG	4	0	0	原发不孕	1.92	＞24	27.8	男方因素	2	6.17	522	1.16	2	7.35	3.21	39.5	2	6	8.2	A-B	ICSI	0	0	0	0	0	0	0	是		无可移植胚胎
1904	1	C00017380	王海敬	≥35	35	4	刺激方案	1	300	≤10天	7	≤3000	2100	HCG	7	1	1	继发不孕	0.23	≤24	18.8	女方因素	2	8.74	511	0.7	3	11.19	3.21	10	4	4	0.67	A-B	IVF	1	0	0	0	0	0	0	是		无可移植胚胎
2280	1	2017050204	张春艳	＜35	32	5	降调节方案	3	303.704	＞10天	27	＞3000	8200	HCG	6	0	0	原发不孕	0.41	＞24	26.7	女方因素	1	2.51	235	1.31	0	8.98	3.21	41	3	3				0	0	0	0	0	0	0	是		未取到卵
1154	1	2017070151	葛锦秀	＜35	34	1	降调节方案	3	450	≤10天	10	＞3000	4500	HCG	5	0	0	继发不孕	1.12	＞24	27.3	混合因素	4	2.46	1244	0.85	3	7.86	3.22	42.42	3	5	8.7	A	ICSI	3	0	2	1	0	0	0	否	否	全胚冷冻
1883	0	C00013026	郭振花	≥35	37	1	刺激方案	1	200	≤10天	6	≤3000	1200	HCG	5	1	1	继发不孕	1.13	≤24	19.8	男方因素	2	19.88	248	1.17		7.14	3.22	39	4	4	1.09	A		0	0	0	0	0	0	0	是		未取卵
1885	0	2017060281	吴晓丽	≥35	42	1	刺激方案	1	192.857	≤10天	7	≤3000	1350	HCG	2	2	1	继发不孕	0.90	＞24	25.6	女方因素	6	10.73	1227	0.79	7	17.37	3.22	45.05	4	9	4	B	IVF	6	0	4	0	0	0	0	否	否	全胚冷冻
222	0	2018060196	于永梅	≥35	39	5	降调节方案	3	152.941	＞10天	17	≤3000	2600	HCG	12	0	0	原发不孕	1.97	＞24	27.3	女方因素	8	1.36	1590	0.78	8	6.5	3.23	45.67	2	9	12.6	A	IVF	3	0	0	0	0	0	0	是		无可移植胚胎
681	1	C00010323	贾鹏	≥35	42	1	降调节方案	3	382.5	≤10天	10	＞3000	3825	HCG	2	2	0	继发不孕	1.32	≤24	21.6	女方因素	5	2.69	1806	1.24	6	4.51	3.23	40.32	2	14	13	B	IVF	6	0	4	2	2	2	0	否	是	移植	未妊娠
1316	1	C00009767	商玲	＜35	33	1	拮抗剂方案	2	359.091	＞10天	11	＞3000	3950	HCG	8	0	0	原发不孕	1.06	≤24	19.9	男方因素	3	3.53	717	0.35	3	7.12	3.23	30	3	8	10.9	A	ICSI	2	0	1	0	1	1	0	否	是	移植	未妊娠
1487	1	C00007016	于雪莲	≥35	39	1	降调节方案	3	320.833	＞10天	18	＞3000	5775	HCG	10	0	0	原发不孕	2.51	≤24	23.3	混合因素	3	4.04	823	0.45	3	3.35	3.23	10	2	10	1.05	A	ICSI	2	0	2	0	2	2	0	否	是	移植	未妊娠
1711	1	C00003682	邱文	≥35	40	1	降调节方案	3	331.25	＞10天	12	＞3000	3975	HCG	2	5	1	继发不孕	1.57	＞24	28.7	女方因素	2	0.66	729	0.29	2	4.51	3.23	40.32	2	8	12.8	B	IVF	1	0	1	0	0	0	0	否	否	全胚冷冻
1929	1	C00017078	刘玉玲	≥35	43	1	刺激方案	1	346.154	＞10天	13	＞3000	4500	HCG	3	2	0	继发不孕	1.10	≤24	24	女方因素	2	22.9	456	1.57	2	5.05	3.23	41	4	8	0.4	A	IVF	0	0	0	0	0	0	0	是		无可移植胚胎
2088	1	C00012566	于永梅	≥35	41	6	刺激方案	1	300	≤10天	7	≤3000	2100	HCG	17	0	0	原发不孕	0.42	＞24	27.3	女方因素	1	3.71	494	0.4	1	6.5	3.23	45.98	4	3	0.88	A	IVF	1	0	0	0	0	0	0	是		无可移植胚胎
1788	0	C00011114	徐艳丽	≥35	35	2	拮抗剂方案	2	150	≤10天	8	≤3000	1200	HCG	1	1	1	继发不孕	2.7	≤24	23.9	女方因素	2	3.22	567	0.28	2	7.41	3.24	23	2	9	12.5	A-B	IVF	1	0	2	0	1	1	0	否	是	移植	未妊娠
2137	0	C00012777	田秀娟	＜35	32	1	拮抗剂方案	2	275	≤10天	6	≤3000	1650	HCG	2	2	1	继发不孕	0.78	＞24	31.3	男方因素	1	1.97	392	0.21	2	14.84	3.24	55	3	4	7.4	B	ICSI	2	0	2	0	2	2	0	否	是	移植	已妊娠	临床妊娠	宫内妊娠	单胎宫内妊娠
411	1	2018040176	周桂丽	≥35	39	2	刺激方案	1	375	＞10天	11	＞3000	4125	HCG	3	3	1	继发不孕	1.29	＞24	26.6	女方因素	7	6.33	1223	0.77	7	9.15	3.25	53	2	8	6.7	B	IVF	1	0	1	0	0	0	0	否	否	全胚冷冻
442	1	2018060233	王立静	≥35	44	1	刺激方案	1	300	≤10天	9	≤3000	2700	HCG	2	4	1	继发不孕	1.94	＞24	26.4	混合因素	6	8.36	1848	1.56	4	8.4	3.25	59.09	2	10	6.9	A-B	ICSI	2	0	2	0	0	0	0	否	否	全胚冷冻
846	1	2016030209	藏忠华	≥35	38	1	刺激方案	1	300	≤10天	9	≤3000	2700	HCG	9	1	0	原发不孕	0.18	＞24	29.3	混合因素	5	11.52	1346	2.38		9.99	3.25	84.98	4	5	11.8	B		0	0	0	0	0	0	0	是		未取卵
944	0	C00018999	邵卫卫	≥35	39	2	拮抗剂方案	2	236.111	≤10天	9	≤3000	2125	HCG	1	4	1	继发不孕	2.1	≤24	22.9	男方因素	4	2.7	790.83	0.69	3	8.58	3.25	39	2	9	8.5	B	ICSI	1	0	1	0	1	1	0	否	是	移植	未妊娠
1034	1	C00004888	李辉	＜35	31	1	刺激方案	1	383.333	≤10天	9	＞3000	3450	HCG	3	0	0	原发不孕	3.49	≤24	21.1	男方因素	4	10.11	1125	1.13	6	11.52	3.25	60	1	16	0.51	A	ICSI	0	0	0	0	0	0	0	是		无可移植胚胎
1365	1	2016030325	丁玲玲	≥35	42	1	降调节方案	3	345	≤10天	10	＞3000	3450	HCG	1	3	1	继发不孕	0.85	＞24	28.1	女方因素	3	4.94	532	1.04	0	8.16	3.25	25.42	4	3	11.3	B		0	0	0	0	0	0	0	是		未取到卵
1413	1	C00013299	王鑫	≥35	36	1	刺激方案	1	300	≤10天	9	≤3000	2700	HCG	11	1	0	继发不孕	1.53	≤24	19.1	女方因素	3	4.54	856	1.14	1	9.74	3.25	71	2	6	1.33	A	IVF	1	0	1	0	1	1	0	否	是	移植	未妊娠
1668	1	C00010267	张慧	＜35	30	1	刺激方案	1	375	≤10天	9	＞3000	3375	HCG	5	0	0	原发不孕	1.36	≤24	22.7	女方因素	2	10.66	830	1.32	1	11.71	3.25	22.69	1	6	0.67	B	IVF	0	0	0	0	0	0	0	是		无可移植胚胎
571	0	2018020046	张焕英	≥35	36	1	降调节方案	3	287.5	＞10天	15	＞3000	4312.5	HCG	15	0	0	原发不孕	2.63	＞24	27.3	女方因素	6	0.77	1746	0.77	6	6.88	3.26	71	2	8	15.2	B	IVF	3	0	1	0	0	0	0	否	否	全胚冷冻
795	0	2016120040	刘立梅	≥35	35	2	拮抗剂方案	2	197.222	≤10天	9	≤3000	1775	HCG	5	0	0	原发不孕	2.20	≤24	23.4	女方因素	5	3.28	1661	1.14	7	8.53	3.26	51.75	2	18	11	A-B	IVF	4	0	1	0	1	1	0	否	是	移植	未妊娠
547	1	C00013004	吴瑞丽	＜35	34	1	拮抗剂方案	2	293.75	＞10天	12	＞3000	3525	HCG	3	2	1	继发不孕	1.66	＞24	26	女方因素	6	3.17	1978	0.73	6	13.28	3.27	44	1	15			IVF	3	0	3	1	2	2	0	否	是	移植	已妊娠	临床妊娠	宫内妊娠	单胎宫内妊娠
697	1	2017080171	崔永惠	≥35	44	2	刺激方案	1	300	≤10天	10	≤3000	3000	HCG	6	2	0	继发不孕	0.38	≤24	23.6	混合因素	5	9.61	1724	1.17	7	7.67	3.27	47.71	4	8	5	A	ICSI	3	0	0	0	0	0	0	是		无可移植胚胎
1787	0	2017090021	孙猛猛	＜35	27	1	刺激方案	1	225	＞10天	16	＞3000	3600	双扳机	5	0	0	原发不孕	0.87	＞24	26.3	女方因素	2	12.96	569	1.07	1	8.99	3.27	47	3	5	8	B-C	IVF	2	0	2	0	0	0	0	否	否	全胚冷冻
2253	0	2018040267	王同艳	≥35	45	3	刺激方案	1	186.364	＞10天	11	≤3000	2050	HCG	1	2	1	继发不孕	0.22	≤24	22.3	女方因素	1	7.05	298	0.42	1	13.28	3.27	44	4	5	7.3		IVF	0	0	0	0	0	0	0	是		未受精
29	0	C00013075	史汇杰	≥35	35	1	拮抗剂方案	2	200	≤10天	7	≤3000	1400	HCG	2	0	0	原发不孕	2.98	≤24	18.4	女方因素	7	6.84	2811	1.53	8	5.69	3.28	43.29	2	14	1.3	A-B	IVF	6	0	5	3	0	0	0	否	否	全胚冷冻
30	1	C00016024	陈晨	＜35	34	1	拮抗剂方案	2	293.75	≤10天	10	≤3000	2937.5	HCG	2	0	0	原发不孕	2.54	≤24	23	男方因素	9	1.44	2678	1.44	9	5.69	3.28	43.29	1	14	12.8	A-B	IVF	2	0	1	0	1	1	0	否	是	移植	未妊娠
39	0	2017110238	孟庆松	≥35	42	1	拮抗剂方案	2	200	≤10天	7	≤3000	1400	HCG	2	2	1	继发不孕	1.8	≤24	21.7	混合因素	9	3.03	2319	0.74	6	5.69	3.28	43.29	2	8	11.3	B	ICSI	4	0	3	1	0	0	0	否	否	全胚冷冻
60	0	C00016861	陈晨	＜35	34	2	降调节方案	3	212.5	＞10天	12	≤3000	2550	HCG	2	0	0	原发不孕	2.55	≤24	23	男方因素	9	2.94	2765	1.1	9	5.69	3.28	43.29	1	13	10.8	A-B	ICSI	5	0	2	1	0	0	0	否	否	全胚冷冻
93	0	C00009771	汤晶	＜35	32	1	降调节方案	3	211.364	＞10天	11	≤3000	2325	HCG	7	2	0	原发不孕	1.89	≤24	19.7	女方因素	9	2.56	1972	2.77	6	10.65	3.28	22	1	18	11.8	A	IVF	4	0	3	2	0	0	0	否	否	全胚冷冻
155	0	2017060112	齐凤珍	≥35	38	1	降调节方案	3	243.75	＞10天	12	≤3000	2925	HCG	3	2	2	继发不孕	1.59	≤24	23.1	女方因素	8	1.36	1856	0.68	9	6.41	3.28	59.3	2	11	16.9	B	IVF	3	0	3	1	0	0	0	否	否	全胚冷冻
524	0	2017100141	郁登敏	＜35	34	1	拮抗剂方案	2	250	≤10天	9	≤3000	2250	HCG	1	0	0	原发不孕	2.26	≤24	22.5	不明原因	6	5.95	2198	1.06	8	10.78	3.28	86.43	1	12	10	A-B	IVF	6	0	4	1	0	0	0	否	否	全胚冷冻
1384	1	2016040224	党迎迎	＜35	33	1	降调节方案	3	375	＞10天	13	＞3000	4875	HCG	7	0	0	原发不孕	2.72	＞24	35.4	女方因素	3	0.98	896	0.52	6	8.16	3.28	57	1	12	9	B	IVF	4	0	3	1	2	2	0	否	是	移植	未妊娠
1687	0	2017030293	杨红霞	≥35	38	1	刺激方案	1	225	≤10天	7	≤3000	1575	HCG	2	1	1	继发不孕	0.42	＞24	26.6	女方因素	2	18.32	778	1.39	1	12.12	3.28	95	4	4	7.9	A-B	IVF	0	0	0	0	0	0	0	是		未受精
1786	0	2017050142	杨红霞	≥35	38	2	刺激方案	1	150	≤10天	7	≤3000	1050	HCG	2	1	1	继发不孕	0.44	＞24	26.6	女方因素	2	13.2	570	0.9	3	6.12	3.28	50.5	4	6	7	A-B	IVF	3	0	2	1	0	0	0	否	否	全胚冷冻
2276	0	C00010175	耿姗姗	＜35	31	1	降调节方案	3	201.562	＞10天	16	＞3000	3225	HCG	7	2	0	继发不孕	2.48	≤24	18.8	女方因素	8	4.69	1606	0.24	9	10.8	3.28	23	1	14			IVF	6	0	4	1	2	2	0	否	是	移植	已妊娠	临床妊娠	宫内妊娠	单胎宫内妊娠
614	0	2017070025	刘成丽	≥35	35	1	降调节方案	3	210	≤10天	10	≤3000	2100	HCG	5	1	0	原发不孕	1.25	＞24	26.5	女方因素	6	0.53	1339	1	6	7.91	3.29	35.42	2	10	11	A	IVF	5	0	4	3	2	2	0	否	是	移植	已妊娠	临床妊娠	宫内妊娠	单胚胎停
692	1	C00003802	葛同娟	＜35	34	1	拮抗剂方案	2	333.333	≤10天	9	≤3000	3000	HCG	4	1	1	继发不孕	3.34	≤24	20.6	女方因素	5	3.76	1755	1.11	8	5.53	3.29	89	1	13	14	A-B	IVF	5	0	2	1	2	2	0	否	是	移植	未妊娠
1277	0	C00019007	苏爱欣	≥35	38	1	拮抗剂方案	2	225	≤10天	7	≤3000	1575	HCG	9	2	1	继发不孕	2.42	≤24	20.4	女方因素	3	0.68	855.16	0.68	4	7.29	3.29	42	2	9	9.9	B	IVF	3	0	2	2	0	0	0	否	否	全胚冷冻
1828	0	2017120071	熊巩莹	＜35	27	4	刺激方案	1	257.143	＞10天	14	＞3000	3600	HCG	4	1	0	继发不孕	1.18	＞24	27.1	女方因素	2	3.09	494	0.18	0	7.29	3.29	42	3	5	5.3	B-C		0	0	0	0	0	0	0	是		未取到卵
2094	0	2017060045	赫玉娥	≥35	45	1	刺激方案	1	131.25	≤10天	8	≤3000	1050	HCG	1	3	1	继发不孕	0.29	≤24	23.4	女方因素	1	20.48	484	0.46		8.81	3.29	38	4	3	11.2	A		0	0	0	0	0	0	0	是		未取卵
743	0	2017120275	赵继婷	≥35	37	1	刺激方案	1	258.333	≤10天	9	≤3000	2325	HCG	1	2	1	继发不孕	2.05	≤24	21.5	女方因素	5	8.38	1434	1.13	6	7.92	3.3	95.42	2	13	7	B-C	IVF	2	0	1	0	0	0	0	否	否	全胚冷冻
200	0	C00018851	王菲菲	≥35	36	1	降调节方案	3	248.077	＞10天	13	＞3000	3225	HCG	3	0	0	原发不孕	2.76	＞24	28.7	女方因素	5	1.24	867.39	0.78	7	6.52	3.31	34.75	2	13	11.1	A	IVF	6	0	5	2	0	0	0	否	否	全胚冷冻
441	0	C00003342	宿萍	≥35	37	2	刺激方案	1	270	≤10天	10	≤3000	2700	HCG	5	0	0	原发不孕	1.20	≤24	22.9	混合因素	6	4.47	1855	1.65	3	8.53	3.31	31	2	7	6		ICSI	2	0	1	0	0	0	0	否	否	全胚冷冻
1485	0	2017070225	宿萍	≥35	35	1	刺激方案	1	195	≤10天	10	≤3000	1950	HCG	5	0	0	原发不孕	2.54	≤24	22.9	女方因素	3	5.49	836.18	0.67	4	8.53	3.31	31	2	7	5.5	B	IVF	4	0	2	1	0	0	0	否	否	全胚冷冻
1872	0	2016020163	牛红霞	≥35	45	3	降调节方案	3	172.5	≤10天	10	≤3000	1725	HCG	2	2	1	继发不孕	0.01	＞24	26.6	女方因素	2	37.24	348	1.59	1	14.92	3.31	26	4	2	11.5	A-B	IVF	1	0	1	0	0	0	0	否	否	全胚冷冻
520	1	C00007176	武广梅	≥35	47	1	刺激方案	1	375	＞10天	12	＞3000	4500	HCG	5	2	1	继发不孕	0.88	＞24	25.4	女方因素	6	25.42	2235	2.23	4	12.84	3.32	21	4	7	0.45	B	IVF	1	0	1	0	0	0	0	否	否	全胚冷冻
738	1	C00005860	李芳	≥35	36	2	拮抗剂方案	2	433.333	≤10天	9	＞3000	3900	HCG	3	2	0	继发不孕	1.49	≤24	19.4	男方因素	5	7.88	1455	1.2	3	8.73	3.32	55	2	8	11.8	A	ICSI	3	0	1	0	0	0	0	否	否	全胚冷冻
1399	1	2018040258	谭新彩	≥35	42	1	降调节方案	3	300	≤10天	9	≤3000	2700	HCG	6	0	0	原发不孕	1.52	≤24	22.9	男方因素	3	1.95	886	0.4	8	5.25	3.32	55.05	2	10	8.6	A	ICSI	7	0	4	2	2	2	0	否	是	移植	未妊娠
1740	0	C00004039	刘金华	≥35	41	1	刺激方案	1	262.5	≤10天	4	≤3000	1050	HCG	2	4	1	继发不孕	0.15	≤24	22.6	男方因素	2	27.91	649	1.16	1	11.11	3.32	53.09	4	2	7.3	B	ICSI	0	0	1	0	0	0	0	否	否	全胚冷冻
2193	0	2017010074	魏玉凤	≥35	40	1	降调节方案	3	150	≤10天	9	≤3000	1350	HCG	1	4	1	继发不孕	0.40	＞24	30.8	女方因素	1	5.13	275	0.07	2	5.63	3.32	99.86	4	3	10.2	A	IVF	1	0	1	1	0	0	0	否	否	全胚冷冻
2222	0	C00003669	郑爱芝	≥35	42	2	拮抗剂方案	2	255	≤10天	5	≤3000	1275	双扳机	3	2	1	继发不孕	0.53	＞24	29.7	女方因素	1	8.72	196	0.24	1	13.18	3.32	27	4	2	6.5	A	IVF	1	0	1	0	0	0	0	否	否	全胚冷冻
113	0	C00006390	高淑娟	＜35	34	1	降调节方案	3	190.909	＞10天	11	≤3000	2100	HCG	1	3	1	继发不孕	2.72	≤24	23.7	女方因素	9	1.91	1704	0.37	9	7.21	3.33	26.18	1	14	11.4	A	IVF	5	1	1	0	1	0	1	否	是	移植	未妊娠
127	0	C00004477	崔连芳	＜35	27	2	降调节方案	3	272.222	≤10天	9	≤3000	2450	HCG	1	0	0	原发不孕	1.70	≤24	23.6	混合因素	8	0.71	1947	2.04	6	7.14	3.33	32.34	1	10	12.7	A	ICSI	5	0	2	0	0	0	0	否	否	全胚冷冻
1412	0	2018030100	满红铃	≥35	44	3	拮抗剂方案	2	248.077	＞10天	13	＞3000	3225	HCG	3	1	1	继发不孕	0.16	≤24	23.4	女方因素	3	4.59	856	1.1	2	7.99	3.33	40	4	7	9.5	A-B	IVF	2	0	0	0	0	0	0	是		无可移植胚胎
1722	0	2017090282	满红铃	≥35	44	2	刺激方案	1	237.5	＞10天	12	≤3000	2850	HCG	3	1	1	继发不孕	0.57	≤24	23.4	不明原因	2	8.45	707	1	2	7.99	3.33	40	4	7	8.9	A	IVF	1	0	1	1	1	1	0	否	是	移植	未妊娠
2073	0	2017070080	满红铃	≥35	43	1	降调节方案	3	225	≤10天	9	≤3000	2025	HCG	3	1	1	继发不孕	1.1	≤24	23.4	不明原因	1	15.4	557	0.29		7.99	3.33	80.1	4	7	9.4	A-B		0	0	0	0	0	0	0	是		未取卵
81	0	2017120153	刘立杰	＜35	31	1	降调节方案	3	257.143	＞10天	14	＞3000	3600	HCG	1	0	0	原发不孕	2.56	＞24	24.8	女方因素	9	2.35	2250	1.05	9	8.77	3.34	45.98	1	18	12.3	A	IVF	4	0	2	0	0	0	0	否	否	全胚冷冻
896	1	C00004146	孙翠青	≥35	38	1	降调节方案	3	352.5	≤10天	10	＞3000	3525	HCG	1	4	1	继发不孕	1.1	＞24	26.6	女方因素	5	0.75	1051	0.44	5	9.42	3.35	47.5	4	7	11.5	A	IVF	3	0	1	0	0	0	0	否	否	全胚冷冻
1038	1	2017040073	王素楠	＜35	31	1	降调节方案	3	293.182	＞10天	11	＞3000	3225	HCG	6	0	0	原发不孕	4.17	＞24	24.4	不明原因	4	0.95	1120	1.18	7	7.29	3.35	35.23	1	9	10.2	A-B	IVF	6	0	2	0	2	2	0	否	是	移植	未妊娠
1281	0	C00004377	孙翠青	≥35	38	2	刺激方案	1	150	≤10天	10	≤3000	1500	HCG	1	4	1	继发不孕	1.10	＞24	26.6	男方因素	3	4.45	846	0.39	4	9.42	3.35	47.5	4	7	0.48	A	ICSI	4	0	3	0	0	0	0	否	否	全胚冷冻
1640	1	C00005852	贾兰	≥35	43	1	拮抗剂方案	2	300	≤10天	7	≤3000	2100	双扳机	11	3	1	继发不孕	1.12	≤24	20.8	女方因素	2	4.29	889	0.32	2	5.44	3.36	10	4	6	10.4	A	IVF	1	0	1	0	1	1	0	否	是	移植	未妊娠
1936	0	C00006835	贾兰	≥35	43	2	刺激方案	1	180	≤10天	5	≤3000	900	双扳机	11	3	1	继发不孕	2.31	≤24	20.8	女方因素	2	2.75	432	0.3	3	5.44	3.36	10	2	7	8.5	B	IVF	0	0	0	0	0	0	0	是		无可移植胚胎
77	0	2018030274	许丹丹	＜35	32	1	降调节方案	3	231.25	＞10天	12	≤3000	2775	HCG	1	2	0	继发不孕	3.82	＞24	26.6	女方因素	9	1.52	2319	0.7	9	7.1	3.37	37	1	16	13.7	A	IVF	8	0	4	2	0	0	0	否	否	全胚冷冻
683	0	2016080151	郝增凤	≥35	46	5	拮抗剂方案	2	150	≤10天	7	≤3000	1050	HCG	8	1	1	继发不孕	1.2	≤24	23.4	混合因素	5	2.4	1800	0.46	7	8.79	3.37	39.09	2	11	7.9		ICSI	5	0	4	3	0	0	0	否	否	全胚冷冻
1143	1	2018010052	韩敏	≥35	40	1	拮抗剂方案	2	350	≤10天	5	≤3000	1750	HCG	4	0	0	原发不孕	2.340	≤24	20.7	混合因素	4	5.13	1303	0.76	7	8.4	3.37	93.36	2	8	10.2	A	ICSI	4	0	2	0	0	0	0	否	否	全胚冷冻
1252	1	2016060266	任晓梅	≥35	46	1	刺激方案	1	375	≤10天	8	≤3000	3000	HCG	6	3	1	继发不孕	0.62	≤24	23.4	女方因素	3	4	905	0.88	2	6.96	3.37	99.86	4	4	8.1	A	IVF	2	0	1	0	1	1	0	否	是	移植	未妊娠
1906	0	2016060234	郝增凤	≥35	46	4	刺激方案	1	150	≤10天	7	≤3000	1050	HCG	8	1	1	继发不孕	1.55	≤24	23.4	混合因素	2	9.79	510	0.74	2	8.79	3.37	39.09	2	11		A	ICSI	1	0	1	0	0	0	0	否	否	全胚冷冻
2229	0	2017030333	李梅	≥35	44	1	降调节方案	3	225	≤10天	6	≤3000	1350	HCG	3	0	0	继发不孕	0.77	＞24	28.4	女方因素	1	28.7	168	1.22		7.05	3.37	69	4	3	11.1	A		0	0	0	0	0	0	0	是		未取卵
892	1	2016120092	屈金杰	≥35	41	1	刺激方案	1	347.727	＞10天	11	＞3000	3825	HCG	5	3	2	继发不孕	0.19	＞24	24.3	女方因素	5	3.39	1060	1.09	4	12.66	3.38	40	4	5	12.3	A	IVF	4	0	2	1	2	2	0	否	是	移植	未妊娠
1009	1	2017040009	李贤芸	≥35	40	1	刺激方案	1	334.091	＞10天	11	＞3000	3675	HCG	3	6	1	继发不孕	0.668	＞24	29.3	女方因素	4	8.82	1234	1.34	4	8.61	3.38	40.09	4	6	5.5	B	IVF	2	0	1	0	0	0	0	否	否	全胚冷冻
1071	1	2016030159	孙姣姣	＜35	29	1	降调节方案	3	333.333	≤10天	9	≤3000	3000	HCG	6	0	0	原发不孕	2.22	≤24	21.4	男方因素	4	2.36	1572	1.48	6	8.61	3.38	40.09	1	12	11.5	A	ICSI	1	0	1	0	0	0	0	否	否	全胚冷冻
1086	0	C00004246	程小玲	≥35	45	1	刺激方案	1	225	≤10天	7	≤3000	1575	HCG	8	0	0	继发不孕	1.89	＞24	30.5	女方因素	4	5.64	1498	1.03	3	12.94	3.38	47	2	7	0.62	A	IVF	0	0	0	0	0	0	0	是		无可移植胚胎
1260	1	C00011846	赵淑侠	≥35	49	2	拮抗剂方案	2	395.455	＞10天	11	＞3000	4350	双扳机	1	1	1	继发不孕	0.56	＞24	31.6	女方因素	3	3.08	888	0.25	2	4.66	3.38	55	4	7	15.9	B	IVF	2	0	1	0	1	1	0	否	是	移植	未妊娠
1422	1	C00016055	罗玉林	≥35	40	3	拮抗剂方案	2	356.25	＞10天	12	＞3000	4275	HCG	2	4	1	继发不孕	0.87	≤24	23	混合因素	3	4.77	974	0.87	5	8.61	3.38	40.09	4	5			ICSI	5	0	2	0	2	2	0	否	是	移植	已妊娠	临床妊娠	宫内妊娠	单胎宫内妊娠
1508	1	C00009299	赵淑侠	≥35	48	1	刺激方案	1	300	＞10天	11	＞3000	3300	HCG	1	1	1	继发不孕	0.58	＞24	31.6	女方因素	3	7.7	890	0.46	5	4.66	3.38	55	4	7	10.9	B	IVF	3	0	2	0	0	0	0	否	否	全胚冷冻
1583	0	2018040169	高云霞	＜35	34	1	降调节方案	3	270	≤10天	10	≤3000	2700	HCG	9	0	0	原发不孕	1.58	≤24	23.3	男方因素	3	1.64	1040	1.15	5	4.71	3.38	34.04	1	12	13.2	A	ICSI	0	0	0	0	0	0	0	是		无可移植胚胎
2087	0	C00017320	刘齐齐	≥35	45	1	拮抗剂方案	2	150	≤10天	9	≤3000	1350	HCG	3	2	1	继发不孕	0.48	≤24	23.8	混合因素	1	16.56	495.35	0.3		14.75	3.38	37	4	3	13	B		0	0	0	0	0	0	0	是		未取卵
2196	0	C00015289	罗玉林	≥35	40	2	拮抗剂方案	2	100	≤10天	6	≤3000	600	HCG	2	4	1	继发不孕	0.36	≤24	23	混合因素	1	6.83	270	0.71	1	8.61	3.38	40.09	4	5	8	A	ICSI	1	0	1	1	1	1	0	否	是	移植	未妊娠
1063	1	C00005969	周金娟	≥35	35	2	拮抗剂方案	2	321.429	≤10天	7	≤3000	2250	HCG	1	0	0	继发不孕	2.32	≤24	14.9	男方因素	4	1.13	1641	0.96	4	6.3	3.39	54	2	7	14.7	B	ICSI	2	0	0	0	0	0	0	是		无可移植胚胎
1242	1	C00004509	周金娟	＜35	34	1	降调节方案	3	365	≤10天	10	＞3000	3650	HCG	1	0	0	原发不孕	1.89	≤24	14.9	男方因素	3	0.26	934	1.21	2	6.3	3.39	54	1	7	13.8	A-B	ICSI	1	0	1	0	1	1	0	否	是	移植	未妊娠
1400	1	C00010436	史建叶	≥35	38	3	刺激方案	1	450	＞10天	11	＞3000	4950	HCG	1	3	0	继发不孕	0.42	≤24	23.3	女方因素	3	23.17	884	1.42	1	7.01	3.39	46.81	4	5	0.45	B	IVF	1	0	1	0	0	0	0	否	否	全胚冷冻
1554	1	C00005965	史建叶	≥35	38	1	拮抗剂方案	2	328.125	≤10天	8	≤3000	2625	HCG	1	3	0	继发不孕	0.427	≤24	23.3	女方因素	3	6.4	1148	3.75	1	7.01	3.39	77	4	5	3.9	A-B	IVF	1	0	1	1	0	0	0	否	否	全胚冷冻
1800	1	2016080138	汲君	≥35	46	3	刺激方案	1	300	＞10天	11	＞3000	3300	HCG	3	3	0	继发不孕	0.48	≤24	21.4	女方因素	2	5.69	540	0.51	3	6.66	3.39	105	4	3	5	B-C	IVF	2	0	2	2	0	0	0	否	否	全胚冷冻
1965	1	C00006413	史建叶	≥35	38	2	拮抗剂方案	2	375	≤10天	5	≤3000	1875	HCG	1	3	0	继发不孕	0.2	≤24	23.3	女方因素	2	3.02	470	0.41	3	7.01	3.39	77	4	5	3.4	B	IVF	3	0	0	0	0	0	0	是		无可移植胚胎
1995	1	C00011583	史建叶	≥35	39	5	刺激方案	1	300	≤10天	8	≤3000	2400	HCG	1	3	0	继发不孕	0.66	≤24	23.3	女方因素	2	12.52	497	1.4	2	7.01	3.39	67	4	5	9.2	A	IVF	1	0	1	0	0	0	0	否	否	全胚冷冻
1276	0	2018020057	辛丽	≥35	36	2	降调节方案	3	225	＞10天	13	≤3000	2925	HCG	2	3	1	继发不孕	1.1	≤24	20.9	女方因素	3	5.87	856	0.89	0	8.78	3.4	34.76	4	6	1.22	A-B		0	0	0	0	0	0	0	是		未取到卵
83	0	2018030010	韩学艳	＜35	34	2	降调节方案	3	225	≤10天	9	≤3000	2025	HCG	2	0	0	原发不孕	2.60	≤24	23.8	男方因素	9	0.44	2161	0.9	7	8.87	3.41	35.42	1	9	10.6	B-C	ICSI	5	0	2	0	2	2	0	否	是	移植	未妊娠
910	0	2017090182	韩学艳	＜35	33	1	降调节方案	3	210	≤10天	10	≤3000	2100	HCG	2	0	0	原发不孕	1.48	≤24	23.8	女方因素	4	3.6	968	0.96	4	8.87	3.41	65.69	1	9	13.5	A	IVF	2	0	0	0	0	0	0	是		无可移植胚胎
1314	0	C00005445	韩学艳	≥35	36	3	刺激方案	1	150	≤10天	7	≤3000	1050	HCG	2	0	0	原发不孕	1.62	≤24	23.8	男方因素	3	1.79	725	0.45	4	8.87	3.41	65.69	2	9	11.7	A	ICSI	2	0	0	0	2	2	0	否	是	移植	已妊娠	临床妊娠	宫内妊娠	单胎宫内妊娠
1324	1	C00018116	李晓	＜35	31	1	刺激方案	1	300	≤10天	8	≤3000	2400	HCG	3	0	0	原发不孕	1.26	＞24	27.9	女方因素	3	4.78	673.43	1.17	4	8.46	3.41	22.29	1	7	6.8	A-B	IVF	1	0	0	0	0	0	0	是		无可移植胚胎
1748	1	2017040197	张一蕾	≥35	44	4	降调节方案	3	352.273	＞10天	11	＞3000	3875	HCG	3	6	1	继发不孕	0.806	≤24	21.5	混合因素	2	2.06	633	0.69	3	11.58	3.41	77.07	4	4	9.8	A-B	ICSI	1	0	0	0	0	0	0	是		无可移植胚胎
2157	1	2016100004	张一蕾	≥35	43	1	刺激方案	1	308.333	≤10天	9	≤3000	2775	HCG	3	6	1	继发不孕	0.23	≤24	21.5	混合因素	1	12.14	352	1.68	3	11.58	3.41	77.07	4	4	8.4	A-B	ICSI	1	0	1	0	0	0	0	否	否	全胚冷冻
2161	1	2016110085	张一蕾	≥35	43	2	刺激方案	1	450	≤10天	9	＞3000	4050	HCG	3	6	1	继发不孕	0.79	≤24	21.5	混合因素	1	17.48	339	1.09	1	11.58	3.41	77.07	4	4	9.4	B	ICSI	1	0	1	0	0	0	0	否	否	全胚冷冻
2274	1	2017100036	黄丽	≥35	39	2	降调节方案	3	292.5	≤10天	10	≤3000	2925	HCG	1	3	1	继发不孕	2.64	＞24	24.1	男方因素	4	3.24	1008	0.28	5	6.69	3.41	26	2	8			ICSI	3	0	3	3	2	2	0	否	是	移植	未妊娠
44	0	C00006371	王道利	≥35	35	1	降调节方案	3	240	≤10天	10	≤3000	2400	HCG	6	1	1	继发不孕	2.13	＞24	26.4	女方因素	9	0.41	2155	0.68	9	7.52	3.42	28	2	20	15.8	A-B	IVF	2	0	0	0	0	0	0	是		无可移植胚胎
902	1	C00010426	司继兰	≥35	41	1	降调节方案	3	381.25	＞10天	12	＞3000	4575	HCG	1	4	1	继发不孕	1.9	≤24	20.5	女方因素	5	1.01	1000	0.8	5	8.13	3.42	56	2	9	11.9	A	IVF	5	0	0	0	0	0	0	是		无可移植胚胎
1183	0	C00006291	张海珠	＜35	31	1	降调节方案	3	200	≤10天	9	≤3000	1800	HCG	1	1	0	继发不孕	1.48	≤24	22.3	女方因素	4	5.56	1123	1.09	6	7	3.42	22	1	8	11.8	A	IVF	1	0	2	0	2	2	0	否	是	移植	未妊娠
1222	1	C00010208	张海珠	＜35	31	2	拮抗剂方案	2	307.5	≤10天	10	＞3000	3075	双扳机	1	1	0	继发不孕	1.2	≤24	22.3	男方因素	3	2.08	988	0.78	7	7	3.42	22	1	8	12.3	A	ICSI	7	0	4	0	2	2	0	否	是	移植	已妊娠	临床妊娠	宫内妊娠	单胎宫内妊娠
2123	0	C00013583	柳雅	≥35	42	6	刺激方案	1	150	＞10天	13	≤3000	1950	HCG	16	0	0	原发不孕	0.468	＞24	28.6	混合因素	1	11.35	426	0.29	2	9.46	3.42	39	4	4	9.7	C	ICSI	0	0	0	0	0	0	0	是		无可移植胚胎
2272	1	C00011921	柳雅	≥35	42	5	刺激方案	1	403.125	＞10天	16	＞3000	6450	HCG	16	0	0	原发不孕	0.14	＞24	28.6	混合因素	2	2.43	412	0.72	2	9.46	3.42	39	4	4			ICSI	1	0	0	0	0	0	0	是		无可移植胚胎
196	0	C00007283	李倩雯	＜35	26	1	降调节方案	3	236.538	＞10天	13	＞3000	3075	HCG	3	0	0	原发不孕	2.22	＞24	26.3	女方因素	8	2.91	2016	0.42	9	12.76	3.43	25	1	15	1.32	A-B	IVF	5	1	2	0	1	1	0	否	是	移植	已妊娠	临床妊娠	宫内妊娠	单胎宫内妊娠
240	1	C00004793	李洋	＜35	29	2	降调节方案	3	300	≤10天	7	≤3000	2100	HCG	5	1	0	继发不孕	2.47	≤24	21.1	女方因素	8	0.16	1015	2.25	8	6.87	3.43	52	1	15	0.9	A	IVF	7	0	4	0	0	0	0	否	否	全胚冷冻
620	0	2017010123	魏凤梅	＜35	33	1	降调节方案	3	257.5	≤10天	10	≤3000	2575	HCG	4	0	0	继发不孕	1.77	≤24	23.1	女方因素	6	1.95	2190	0.82	6	6.27	3.43	25.42	1	12	13.1	A	IVF	6	0	6	0	0	0	0	否	否	全胚冷冻
641	0	C00003517	李洋	＜35	29	1	降调节方案	3	172.5	≤10天	10	≤3000	1725	HCG	5	1	0	继发不孕	3.0	≤24	21.1	女方因素	5	1.22	950	1.96	5	6.87	3.43	52	1	12	9.8	A	IVF	2	0	2	0	2	2	0	否	是	移植	未妊娠
948	0	C00019154	张秀华	≥35	46	1	拮抗剂方案	2	281.25	≤10天	8	≤3000	2250	HCG	17	3	0	继发不孕	0.58	＞24	27.2	混合因素	4	1.38	728.36	0.54	4	7.3	3.44	23	4	8	10.6	A	ICSI	2	0	2	1	2	2	0	否	是	移植	未妊娠
1125	1	2016040230	侯延芬	≥35	44	5	刺激方案	1	450	≤10天	9	＞3000	4050	HCG	6	3	2	继发不孕	0.26	＞24	26.9	女方因素	4	2.71	1361	0.49	3	14.72	3.44	81	4	4	6	B	IVF	3	0	2	0	0	0	0	否	否	全胚冷冻
2017	1	C00008460	张华	≥35	44	1	刺激方案	1	300	≤10天	9	≤3000	2700	HCG	19	0	0	原发不孕	0.20	＞24	27.9	女方因素	1	11.25	788	0.27	2	12.55	3.44	10	4	4	0.68	B	IVF	2	0	0	0	0	0	0	是		无可移植胚胎
698	0	C00016334	李娟	≥35	35	1	拮抗剂方案	2	206.25	≤10天	8	≤3000	1650	HCG	5	0	0	原发不孕	1.83	≤24	21.5	混合因素	5	2.08	1702	0.68	7	10.21	3.45	28	2	14	9.1	A	ICSI	2	0	0	0	0	0	0	是		无可移植胚胎
741	1	C00005695	张忠英	≥35	44	1	刺激方案	1	420	≤10天	10	＞3000	4200	双扳机	2	2	1	继发不孕	0.38	≤24	19.1	女方因素	5	4.72	1439	1.35	3	7.98	3.45	66	4	7	9.8	A	IVF	1	0	1	1	0	0	0	否	否	全胚冷冻
844	1	C00006219	鲁桂芹	≥35	40	5	刺激方案	1	300	≤10天	8	≤3000	2400	HCG	1	3	0	继发不孕	1.37	＞24	29.3	女方因素	5	1.34	1362	0.77	6	6.55	3.45	53	2	8	1.12	B	IVF	5	0	1	1	0	0	0	否	否	全胚冷冻
1315	1	C00008745	丁洁	＜35	30	2	降调节方案	3	293.75	＞10天	12	＞3000	3525	HCG	3	1	0	继发不孕	1.03	≤24	20.5	女方因素	3	0.69	723	0.36	2	8.59	3.45	62	3	6	1.08	A	IVF	0	0	0	0	0	0	0	是		无可移植胚胎
1390	0	C00008947	柳雅	≥35	41	3	刺激方案	1	150	＞10天	12	≤3000	1800	双扳机	16	0	0	原发不孕	1.09	＞24	28.6	混合因素	3	6.39	904	0.41	3	8.94	3.45	32	4	4	8.8	A-B	ICSI	2	0	1	0	0	0	0	否	否	全胚冷冻
1681	0	C00006314	柳雅	≥35	41	1	刺激方案	1	245.455	＞10天	11	≤3000	2700	HCG	16	0	0	原发不孕	0.14	＞24	28.6	混合因素	2	7.58	793	0.11	1	8.94	3.45	32	4	4	7.2		ICSI	1	0	1	0	0	0	0	否	否	全胚冷冻
2172	0	2018030276	袁利娟	≥35	36	1	刺激方案	1	168.75	≤10天	4	≤3000	675	HCG	3	2	1	继发不孕	0.65	≤24	23	混合因素	1	4.82	321	0.36	0	8.98	3.45	45.76	4	5	8.8	B		0	0	0	0	0	0	0	是		未取到卵
886	0	2016120157	杨文静	＜35	30	3	降调节方案	3	245	＞10天	15	＞3000	3675	HCG	3	1	1	继发不孕	2.58	＞24	29.7	男方因素	5	1.91	1102	0.43	3	6.13	3.46	46.81	1	22	22.3	A-B	ICSI	2	0	2	0	0	0	0	否	否	全胚冷冻
1036	0	2017100166	李秀亭	≥35	46	1	刺激方案	1	225	≤10天	8	≤3000	1800	HCG	2	2	0	继发不孕	0.54	≤24	21.2	女方因素	4	4.57	1122	0.92	3	11.48	3.46	21	4	6	8	B	IVF	0	0	0	0	0	0	0	是		未受精
1076	0	2017070004	段芳芳	＜35	34	3	刺激方案	1	150	≤10天	9	≤3000	1350	HCG	3	3	1	继发不孕	0.47	≤24	24	女方因素	4	6.66	1561	0.86		11.33	3.46	43	3	4	7.2	A		0	0	0	0	0	0	0	是		未取卵
1163	1	C00006902	何道英	≥35	40	2	降调节方案	3	321.875	＞10天	24	＞3000	7725	HCG	3	1	1	继发不孕	1.34	＞24	25.4	女方因素	4	8.97	1206	1.39	4	9.27	3.46	68	2	15	1	A-B	IVF	2	0	2	0	2	2	0	否	是	移植	未妊娠
1202	0	C00017336	刘蕾	＜35	34	1	拮抗剂方案	2	200	≤10天	8	≤3000	1600	HCG	1	3	1	继发不孕	2.83	＞24	25	女方因素	4	2.99	1043	0.6	6	5.99	3.46	22	1	12	7.7	A	IVF	3	0	3	1	0	0	0	否	否	全胚冷冻
1915	0	2017030287	熊巩莹	＜35	27	1	刺激方案	1	225	≤10天	8	≤3000	1800	HCG	4	1	0	继发不孕	1.1	＞24	27.1	女方因素	2	3.14	490	0.52	1	11.33	3.46	43	3	5	5	A	IVF	1	0	1	0	0	0	0	否	否	全胚冷冻
2061	1	2017040122	段芳芳	＜35	34	1	降调节方案	3	291.667	≤10天	9	≤3000	2625	HCG	3	3	1	继发不孕	0.99	≤24	24	女方因素	1	18.92	605	0.5	2	11.33	3.46	43	3	4	9.8	B	IVF	0	0	0	0	0	0	0	是		无可移植胚胎
2071	0	2016030213	尹芳	＜35	31	2	刺激方案	1	216.667	≤10天	9	≤3000	1950	HCG	1	1	0	继发不孕	0.64	≤24	20.5	女方因素	1	15.37	560	0.94	0	11.33	3.46	43	3	4	4	A-B		0	0	0	0	0	0	0	是		未取到卵
2165	0	C00013396	吴慧慧	≥35	35	7	降调节方案	3	278.571	＞10天	14	＞3000	3900	HCG	7	0	0	原发不孕	2.15	＞24	27.3	女方因素	1	7.94	329	0.05	0	6.57	3.46	31	2	11	9.7	A		0	0	0	0	0	0	0	是		未取到卵
801	1	C00015604	蒙延坤	＜35	32	2	降调节方案	3	389.062	＞10天	16	＞3000	6225	HCG	1	4	2	继发不孕	1.51	＞24	24.2	女方因素	5	2.57	1622	1.03	7	10.3	3.47	63	1	10	13.6	A-B	IVF	2	0	2	1	0	0	0	否	否	全胚冷冻
1123	1	C00012144	蒙延坤	＜35	32	1	拮抗剂方案	2	322.5	≤10天	10	＞3000	3225	HCG	6	3	2	继发不孕	2.47	＞24	24.2	女方因素	4	7.71	1363	0.5	5	10.3	3.47	63	1	10	8.1	A	IVF	2	0	2	1	2	2	0	否	是	移植	已妊娠	临床妊娠	宫内妊娠	单胚胎停
1284	0	2018010124	刘燕	＜35	33	1	刺激方案	1	259.375	＞10天	32	＞3000	8300	HCG	1	0	0	原发不孕	3.99	＞24	24.2	女方因素	3	2.39	823	2.07	4	6.7	3.47	29.09	1	10	15.8	B-C	IVF	1	0	1	0	0	0	0	否	否	全胚冷冻
505	0	2018060011	贾宝利	＜35	25	1	拮抗剂方案	2	281.944	≤10天	9	≤3000	2537.5	双扳机	3	0	0	原发不孕	1.81	≤24	17.5	女方因素	6	1.09	2437	1.67	6	15.21	3.48	35	1	9	11.8	A	IVF	0	0	0	0	0	0	0	否	否	全胚冷冻
640	1	C00011048	张志云	≥35	43	2	拮抗剂方案	2	325	≤10天	8	≤3000	2600	HCG	3	3	1	继发不孕	1.76	＞24	26.4	混合因素	5	2.12	1954	1.64	6	9.66	3.48	36	2	9	8.3	A	ICSI	3	0	2	1	2	2	0	否	是	移植	未妊娠
2266	1	2016020012	宁尚玉	＜35	32	1	降调节方案	3	300	≤10天	9	≤3000	2700	HCG	5	1	0	原发不孕	1.64	＞24	25.6	女方因素	7	4.12	1323	1.07	7	6.81	3.48	50.5	1	9			IVF	3	0	3	3	2	2	0	否	是	移植	已妊娠	临床妊娠	宫内妊娠	单胎宫内妊娠
112	0	C00015749	姜洋	＜35	33	1	降调节方案	3	202.941	＞10天	17	＞3000	3450	HCG	3	0	0	原发不孕	2.50	≤24	20.8	女方因素	9	1.09	1704	0.92	8	5.8	3.49	40	1	14	11.3	A	IVF	5	0	2	1	0	0	0	否	否	全胚冷冻
164	0	2018070103	刘霞	＜35	32	1	拮抗剂方案	2	188.393	＞10天	28	＞3000	5275	HCG	4	1	0	继发不孕	1.67	≤24	19.2	女方因素	8	0.31	2705	1.09	5	4.86	3.49	59.09	1	9	10.6	A	IVF	3	0	2	1	2	2	0	否	是	移植	未妊娠
658	0	C00008461	姚敏	≥35	39	1	降调节方案	3	231.25	＞10天	12	≤3000	2775	HCG	5	2	1	继发不孕	2.3	＞24	25.3	女方因素	5	1.12	521	0.43	3	11.97	3.49	34	2	12	1.47	A	IVF	1	0	2	0	2	2	0	否	是	移植	未妊娠
874	1	2016120005	刘建梅	≥35	41	4	刺激方案	1	428.571	＞10天	14	＞3000	6000	HCG	5	1	1	继发不孕	1.76	＞24	29.7	混合因素	5	1.1	1175	0.76	3	6.75	3.49	93	2	10	12	B	ICSI	1	0	1	0	0	0	0	否	否	全胚冷冻
878	1	2016030162	刘建梅	≥35	40	1	降调节方案	3	350	＞10天	15	＞3000	5250	HCG	5	0	0	继发不孕	3.20	＞24	29.7	男方因素	5	6.06	1157	1.26	3	6.75	3.49	33.36	2	10	11	A	ICSI	2	0	1	0	1	1	0	否	是	移植	未妊娠
1121	1	2016030002	赵丽丽	＜35	34	1	刺激方案	1	348.214	＞10天	14	＞3000	4875	双扳机		0	0	原发不孕	1.42	＞24	27.3	男方因素	4	13.98	1373	0.89	5	5.8	3.49	40	1	15	10	A	ICSI	4	0	2	0	0	0	0	否	否	全胚冷冻
1182	0	2017060201	刘建梅	≥35	41	5	刺激方案	1	225	＞10天	11	≤3000	2475	HCG	5	1	1	继发不孕	1.8	＞24	29.7	混合因素	4	6.33	1125	1.15	4	6.75	3.49	35.42	2	10	6.8	B	ICSI	2	0	2	0	0	0	0	否	否	全胚冷冻
1203	1	C00017025	高丽娜	≥35	37	2	降调节方案	3	335	≤10天	10	＞3000	3350	HCG	3	2	0	继发不孕	2.93	≤24	23.4	混合因素	4	3.26	1038	0.83	5	11.49	3.49	58	2	8	10.6	A	ICSI	2	0	1	0	1	1	0	否	是	移植	未妊娠
1322	1	C00016065	高丽娜	≥35	36	1	拮抗剂方案	2	300	≤10天	7	≤3000	2100	HCG	3	2	0	继发不孕	0.47	＞24	26	女方因素	3	8.06	689	0.6	3	11.49	3.49	58	4	6	11.6	A	IVF	2	0	1	0	1	1	0	否	是	移植	未妊娠
1369	1	2018040236	刘建梅	≥35	42	7	刺激方案	1	375	≤10天	7	≤3000	2625	HCG	5	1	1	继发不孕	2.7	＞24	29.7	男方因素	3	6.59	504	1.37	4	6.75	3.49	53	2	10	5.8	B	ICSI	3	0	2	0	0	0	0	否	否	全胚冷冻
1782	1	2016100126	刘建梅	≥35	40	3	拮抗剂方案	2	384.375	≤10天	8	＞3000	3075	HCG	5	1	1	继发不孕	1.97	＞24	29.7	混合因素	2	2.65	578	0.35	5	6.75	3.49	93	2	10	10.3	A	ICSI	2	0	2	0	0	0	0	否	否	全胚冷冻
1801	1	C00017325	阮氏小	≥35	37	1	刺激方案	1	300	≤10天	9	≤3000	2700	HCG	2	2	2	继发不孕	1.9	＞24	28	女方因素	2	15.41	538	0.82	2	13.64	3.49	21	2	5	0.61	A	IVF	2	0	2	0	0	0	0	否	否	全胚冷冻
1834	1	2016120160	时新萃	≥35	46	2	刺激方案	1	300	≤10天	7	≤3000	2100	HCG	5	3	2	继发不孕	0.09	＞24	29.3	女方因素	2	4.84	480	1.05	2	19.26	3.49	99.09	4	2	8.5	A-B	IVF	1	0	1	0	0	0	0	否	否	全胚冷冻
1852	0	2016110253	时新萃	≥35	46	1	刺激方案	1	266.667	≤10天	9	≤3000	2400	HCG	5	3	2	继发不孕	0.11	＞24	29.3	女方因素	2	2.95	417	1.17	1	19.26	3.49	99.09	4	2	8.9	A-B	IVF	1	0	1	0	0	0	0	否	否	全胚冷冻
1877	0	2016040223	李婷	≥35	45	4	拮抗剂方案	2	278.571	≤10天	7	≤3000	1950	HCG	1	3	1	继发不孕	0.26	≤24	21.4	不明原因	2	2.32	292	0.08	1	14.78	3.49	25.42	4	2	7	B	IVF	1	0	1	0	0	0	0	否	否	全胚冷冻
1949	0	C00009928	贾秀萍	≥35	38	4	刺激方案	1	150	≤10天	8	≤3000	1200	双扳机	2	2	1	继发不孕	0.91	≤24	21.3	女方因素	2	9.73	509	0.74	2	10.8	3.49	78	4	5	5.3	A-B	IVF	2	0	2	2	0	0	0	否	否	全胚冷冻
2004	0	C00010242	贾秀萍	≥35	38	5	刺激方案	1	214.286	≤10天	7	≤3000	1500	双扳机	2	2	1	继发不孕	0.9	≤24	21.3	女方因素	1	15.26	961	0.67	3	10.8	3.49	78	4	4	0.5		IVF	0	0	0	0	0	0	0	是		无可移植胚胎
2247	0	C00010452	周静	≥35	47	3	刺激方案	1	250	≤10天	7	≤3000	1750	HCG	3	3	0	继发不孕	0.836	≤24	19.5	女方因素	1	12.88	465.78	0.82	2	19.78	3.49	78	4	4	5.1	B	IVF	1	0	1	0	0	0	0	否	否	全胚冷冻
52	0	C00010927	杨玲	＜35	22	1	降调节方案	3	195	≤10天	10	≤3000	1950	HCG	2	0	0	原发不孕	2.64	≤24	22	女方因素	9	0.62	2975	2.23	7	6.5	3.5	35	1	17	10.1	A	IVF	2	0	2	0	2	2	0	否	是	移植	已妊娠	临床妊娠	宫内妊娠	双胎宫内妊娠
212	0	C00013293	安姗	＜35	33	2	降调节方案	3	284.615	＞10天	13	＞3000	3700	HCG	4	0	0	原发不孕	2.85	＞24	26	混合因素	8	1.19	1763	0.97	9	8.91	3.5	16	1	18	11	A	ICSI	6	0	2	0	2	2	0	否	是	移植	已妊娠	临床妊娠	宫内妊娠	单胚胎停
214	0	2016120169	唐圆圆	＜35	32	3	降调节方案	3	155	≤10天	10	≤3000	1550	HCG	1	1	0	继发不孕	2.36	≤24	17.7	男方因素	8	0.77	1712	0.97	4	6.87	3.5	77	1	15	12.7	A	ICSI	3	0	0	0	0	0	0	是		无可移植胚胎
401	0	C00012466	安姗	＜35	33	1	拮抗剂方案	2	218.182	＞10天	11	≤3000	2400	HCG	4	0	0	原发不孕	2.92	≤24	23	女方因素	7	4.28	13.36	0.76	9	8.91	3.5	16	1	18	0.85	A	IVF	4	0	2	0	2	2	0	否	是	移植	未妊娠
512	0	C00012138	张凤娟	＜35	34	1	降调节方案	3	279.545	＞10天	11	＞3000	3075	HCG	3	4	2	继发不孕	1.23	≤24	22.3	女方因素	6	2.32	2338	0.86	5	6.72	3.5	35	1	20	12	A	IVF	3	0	1	0	0	0	0	否	否	全胚冷冻
931	1	2017110132	王玉影	≥35	43	1	刺激方案	1	337.5	＞10天	12	＞3000	4050	HCG	3	3	1	继发不孕	0.33	≤24	22.3	混合因素	4	17.98	860	1.64	4	5.93	3.5	67.09	4	5	5	C	ICSI	3	0	2	0	0	0	0	否	否	全胚冷冻
995	0	2017060284	胡小凤	≥35	48	2	刺激方案	1	150	≤10天	7	≤3000	1050	HCG	2	2	2	继发不孕	0.49	≤24	22.4	混合因素	4	4.89	1303	1.43	4	7.12	3.5	46.43	4	8	10.2	A	ICSI	2	0	1	0	0	0	0	否	否	全胚冷冻
1117	0	2016120095	胡小凤	≥35	47	1	刺激方案	1	200	≤10天	6	≤3000	1200	HCG	2	2	2	继发不孕	0.53	≤24	22.4	混合因素	4	5.64	1390	2.1	4	7.12	3.5	46.43	4	8	7.7	A-B	ICSI	2	0	2	0	0	0	0	否	否	全胚冷冻
1475	1	2016030237	吴香云	≥35	40	5	拮抗剂方案	2	450	≤10天	9	＞3000	4050	HCG	14	1	0	继发不孕	0.67	≤24	23.6	女方因素	3	2.17	886	1.39	3	9.89	3.5	35.23	4	5	9.6	A	IVF	3	0	1	1	1	1	0	否	是	移植	未妊娠
1598	0	C00018865	于杨	＜35	34	3	拮抗剂方案	2	150	≤10天	7	≤3000	1050	HCG	3	1	0	继发不孕	1.5	≤24	20.5	女方因素	3	2.2	918	0.71	3	11	3.5	55	1	9	10	A-B	IVF	2	0	2	0	0	0	0	否	否	全胚冷冻
1652	1	C00016877	于杨	＜35	33	1	刺激方案	1	400	≤10天	9	＞3000	3600	HCG	3	1	0	继发不孕	1.43	≤24	20.5	女方因素	2	7.93	857	1.21	1	11	3.5	55	1	9	0.91	B	IVF	0	0	0	0	0	0	0	是		无可移植胚胎
650	1	2016050077	杨震	≥35	39	1	刺激方案	1	345	≤10天	10	＞3000	3450	HCG	1	3	1	继发不孕	1.31	＞24	27.3	女方因素	5	2.55	774	0.25	2	4.32	3.51	32.32	2	11	10.9	A-B	IVF	2	0	2	0	0	0	0	否	否	全胚冷冻
864	0	C00004365	李凤娟	≥35	43	1	刺激方案	1	150	≤10天	7	≤3000	1050	HCG	2	0	0	原发不孕	0.39	≤24	22.1	女方因素	5	8.53	1237	1.38	3	9.77	3.51	32.76	4	6	12	B	IVF	2	0	2	1	0	0	0	否	否	全胚冷冻
1356	0	C00005423	耿雪	＜35	31	7	拮抗剂方案	2	250	≤10天	9	≤3000	2250	双扳机	3	1	0	继发不孕	0.45	≤24	19	女方因素	3	0.9	554	0.79	3	7.32	3.51	76.43	3	5	10	A-B	IVF	1	0	1	1	1	1	0	否	是	移植	已妊娠	临床妊娠	宫内妊娠	单胚胎停
1414	1	2016080216	耿雪	＜35	27	3	刺激方案	1	369.231	＞10天	13	＞3000	4800	HCG	3	0	0	原发不孕	2.810	≤24	19	女方因素	3	2.28	855.16	0.91	6	7.32	3.51	36.43	1	8	14.8	A	IVF	2	0	2	1	2	2	0	否	是	移植	未妊娠
1674	1	2016060163	耿雪	＜35	27	2	刺激方案	1	300	≤10天	7	≤3000	2100	HCG	3	0	0	原发不孕	0.27	≤24	19	女方因素	2	7.14	818	0.76	2	7.32	3.51	66.43	3	5	6.4	A-B	IVF	2	0	2	0	0	0	0	否	否	全胚冷冻
1897	0	2017040183	耿雪	＜35	28	4	刺激方案	1	150	≤10天	9	≤3000	1350	HCG	3	0	0	原发不孕	0.89	≤24	19	女方因素	2	7.56	886	1.15	3	7.32	3.51	91	3	5	6.2	B	IVF	3	0	3	2	0	0	0	否	否	全胚冷冻
1907	1	2017090156	耿雪	＜35	28	5	刺激方案	1	300	≤10天	9	≤3000	2700	HCG	3	1	0	继发不孕	1.03	≤24	19	女方因素	2	10.52	509	0.27	2	7.32	3.51	66.43	3	5	4.6	A	IVF	2	0	2	0	0	0	0	否	否	全胚冷冻
1971	1	2017030041	史建平	≥35	41	1	降调节方案	3	450	≤10天	10	＞3000	4500	HCG	2	5	1	继发不孕	0.63	＞24	25	混合因素	2	0.58	456	0.78	4	7.5	3.51	93	4	5	14.7	A	ICSI	3	0	2	1	2	2	0	否	是	移植	未妊娠
2234	0	C00003538	耿雪	＜35	30	6	降调节方案	3	252.273	＞10天	11	≤3000	2775	HCG	3	1	0	继发不孕	0.50	≤24	19	女方因素	1	0.41	138	0.29	1	7.32	3.51	86.43	3	3	9.4	A	IVF	1	0	1	0	1	1	0	否	是	移植	未妊娠
1796	1	C00010960	巩守霞	≥35	42	1	拮抗剂方案	2	314.062	≤10天	8	≤3000	2512.5	双扳机	1	5	1	继发不孕	0.95	≤24	23.2	女方因素	2	3.02	546	0.25	2	11.4	3.52	48	4	7	10	A	IVF	0	0	0	0	0	0	0	是		未受精
1932	1	2017020203	周春玲	≥35	43	2	刺激方案	1	300	≤10天	8	≤3000	2400	HCG	13	5	2	继发不孕	0.7	＞24	24.2	女方因素	2	4.76	439	0.62	2	9.26	3.52	40.1	4	4	12.7	B	IVF	2	0	2	0	0	0	0	否	否	全胚冷冻
1988	1	2016120031	周春玲	≥35	43	1	刺激方案	1	316.667	≤10天	9	≤3000	2850	HCG	13	5	2	继发不孕	0.41	＞24	24.2	女方因素	2	6.26	406	0.43	1	9.26	3.52	90.1	4	4	12.8	B-C	IVF	1	0	1	1	0	0	0	否	否	全胚冷冻
217	1	2016110019	李俊霞	≥35	45	1	刺激方案	1	300	≤10天	8	≤3000	2400	HCG	1	4	1	原发不孕	1.24	＞24	25.8	女方因素	8	3.44	1659	1.45	5	12.54	3.53	50	2	9	8.8	A	IVF	5	0	0	0	0	0	0	是		无可移植胚胎
676	1	2017060283	徐凡一	≥35	40	1	刺激方案	1	300	≤10天	9	≤3000	2700	HCG	1	2	1	继发不孕	1.2	≤24	23	女方因素	5	1.47	1838	1.01	4	6.03	3.53	80	2	7	10.3	B	IVF	4	0	2	1	0	0	0	否	否	全胚冷冻
1164	1	2018040187	杨金红	≥35	41	2	刺激方案	1	300	≤10天	10	≤3000	3000	HCG	3	4	1	继发不孕	0.88	≤24	21.8	不明原因	4	0.9	1205	0.48	3	8.72	3.53	73	4	4	7	A-B	IVF	2	0	0	0	0	0	0	是		无可移植胚胎
1165	0	C00009648	韩金荣	＜35	34	1	拮抗剂方案	2	210	≤10天	10	≤3000	2100	HCG	6	0	0	原发不孕	3.08	≤24	22.8	女方因素	4	3.8	1202	0.48	3	6.98	3.53	34.9	1	10	13.1	A-B	IVF	3	0	2	0	2	2	0	否	是	移植	已妊娠	临床妊娠	宫内妊娠	单胚胎停
1258	0	2017070269	马青青	≥35	38	5	刺激方案	1	150	≤10天	7	≤3000	1050	HCG	2	1	0	继发不孕	2.06	≤24	19.2	女方因素	3	26.19	895	2.22	4	9.76	3.53	53	2	8	12.2	B	IVF	2	0	0	0	0	0	0	是		无可移植胚胎
1421	0	2017110012	杨金红	≥35	41	1	刺激方案	1	275	＞10天	12	＞3000	3300	HCG	3	4	1	继发不孕	0.17	≤24	21.8	不明原因	3	7.77	974	0.39	1	8.72	3.53	73	4	4	6.3	A-B	IVF	1	0	0	0	0	0	0	是		无可移植胚胎
363	1	C00011953	王秀秀	＜35	29	1	拮抗剂方案	2	381.25	＞10天	12	＞3000	4575	HCG	1	0	0	原发不孕	2.26	＞24	25.2	男方因素	7	7.69	1786	1.24	3	6.86	3.54	37.04	1	8	12.7	A	ICSI	2	0	1	0	0	0	0	否	否	全胚冷冻
1594	0	C00008436	张学丽	≥35	36	1	拮抗剂方案	2	150	≤10天	7	≤3000	1050	HCG	5	2	1	继发不孕	1.34	≤24	20.2	女方因素	3	1.09	1004	0.03	1	7.48	3.54	91	2	9	5.9	B	IVF	0	0	1	0	0	0	0	否	否	全胚冷冻
516	1	2018020058	姜金玲	≥35	43	3	降调节方案	3	425	＞10天	12	＞3000	5100	HCG	1	2	1	继发不孕	1.60	≤24	20.3	男方因素	6	10.5	2284	0.11	7	6.59	3.55	52.32	2	8	12.1	A	ICSI	4	0	2	1	2	2	0	否	是	移植	未妊娠
805	1	2016070167	王煜	≥35	41	2	刺激方案	1	300	≤10天	9	≤3000	2700	HCG	6	1	0	继发不孕	1.62	＞24	25.7	女方因素	3	0.86	970	3.16	8	9.79	3.55	26.43	2	10	7.6	B	IVF	7	0	6	1	0	0	0	否	否	全胚冷冻
111	1	2017030196	全芯	≥35	43	3	降调节方案	3	300	＞10天	14	＞3000	4200	HCG	2	2	0	继发不孕	2.56	≤24	21.4	混合因素	9	1.05	1777	0.6	8	9.78	3.56	40.4	2	11	14	A	ICSI	6	0	4	2	0	0	0	否	否	全胚冷冻
1367	1	C00014253	朱伟琴	＜35	33	1	拮抗剂方案	2	375	≤10天	5	≤3000	1875	HCG	2	3	1	继发不孕	1.5	＞24	26.4	女方因素	3	2.43	516	0.64	3	11.54	3.56	31	1	6	1.06	B	IVF	3	0	3	2	0	0	0	否	否	全胚冷冻
2000	1	2016010014	陈宗英	≥35	40	2	刺激方案	1	318.75	＞10天	16	＞3000	5100	HCG	2	5	0	继发不孕	0.479	＞24	27.3	男方因素	2	11.24	486	0.49	3	14.23	3.56	19	4	6	4	B	ICSI	3	0	2	0	0	0	0	否	否	全胚冷冻
74	0	2018030186	钊月月	＜35	26	1	降调节方案	3	207.692	＞10天	13	≤3000	2700	HCG	3	0	0	原发不孕	3.34	≤24	22.2	女方因素	9	0.96	2411	0.88	7	5.92	3.57	53	1	14	14.6	A-B	IVF	6	0	2	2	2	2	0	否	是	移植	未妊娠
478	1	C00003631	钊月月	＜35	27	2	降调节方案	3	455.769	＞10天	13	＞3000	5925	HCG	3	0	0	原发不孕	4.6	≤24	22.2	女方因素	6	1.17	1746	0.95	7	5.92	3.57	34.04	1	14	13.6	A	IVF	6	0	2	1	2	2	0	否	是	移植	未妊娠
642	1	C00005363	张玮	＜35	33	1	拮抗剂方案	2	363.889	≤10天	9	＞3000	3275	HCG	6	0	0	原发不孕	1.98	＞24	30.1	女方因素	5	3.9	942	0.77	5	10.42	3.57	35	1	11	9.4	A	IVF	1	1	2	0	1	1	0	否	是	移植	已妊娠	临床妊娠	宫内妊娠	单胎宫内妊娠
671	1	C00009933	梁爱华	≥35	42	3	刺激方案	1	450	≤10天	9	＞3000	4050	HCG	1	2	1	继发不孕	1.47	＞24	25.7	混合因素	5	17.21	1879	1.79	6	12.4	3.57	55	2	9	0.7	A	ICSI	3	0	4	1	0	0	0	否	否	全胚冷冻
974	1	2016050226	魏彦丽	≥35	45	1	刺激方案	1	293.182	＞10天	11	＞3000	3225	HCG	5	2	1	继发不孕	1.09	≤24	20.5	女方因素	4	15.96	1369	2.25	6	8.77	3.57	45.42	4	9	7	A-B	IVF	0	0	0	0	0	0	0	是		未受精
1435	0	C00003729	梁爱华	≥35	41	1	刺激方案	1	225	≤10天	9	≤3000	2025	HCG	1	2	1	继发不孕	0.75	＞24	25.7	混合因素	3	14.72	941	1.03	2	12.4	3.57	55	4	5	0.72	B	ICSI	2	0	2	1	0	0	0	否	否	全胚冷冻
1492	1	C00010134	陈慧勤	＜35	31	1	拮抗剂方案	2	500	＞10天	15	＞3000	7500	双扳机	1	0	0	原发不孕	1.1	≤24	23.4	女方因素	3	1.04	804	0.39	4	6.79	3.57	38	3	7	14	B	IVF	2	0	1	1	1	1	0	否	是	移植	未妊娠
1530	0	C00016173	杨俊玲	≥35	40	1	拮抗剂方案	2	281.25	≤10天	8	≤3000	2250	HCG	8	2	0	继发不孕	0.28	≤24	20.9	女方因素	3	3.18	1237	1.03	3	8.08	3.57	26.43	4	5	12.6	A	IVF	3	0	2	1	2	2	0	否	是	移植	已妊娠	临床妊娠	宫外妊娠	异位妊娠
1692	1	C00006427	梁爱华	≥35	42	2	刺激方案	1	416.667	≤10天	9	＞3000	3750	HCG	1	2	1	继发不孕	0.73	＞24	25.7	混合因素	2	11.84	769	0.79	3	12.4	3.57	55	4	7	0.53	B	ICSI	2	0	2	0	0	0	0	否	否	全胚冷冻
1725	1	C00012223	陈慧勤	＜35	31	2	刺激方案	1	360	≤10天	10	＞3000	3600	HCG	1	0	0	原发不孕	1.41	≤24	23.4	女方因素	2	3.52	701	0.11	1	6.79	3.57	38	1	7	13.7	B	IVF	0	0	0	0	0	0	0	是		无可移植胚胎
241	1	C00017836	温春晓	＜35	23	1	降调节方案	3	331.25	＞10天	12	＞3000	3975	HCG	2	0	0	原发不孕	4.34	＞24	27.7	混合因素	8	0.9	1014.96	1.02	7	9.02	3.58	35	1	13	11.8	A-B	ICSI	4	0	0	0	0	0	0	是		无可移植胚胎
154	0	C00015050	段玉杰	≥35	40	1	拮抗剂方案	2	285	≤10天	10	≤3000	2850	HCG	1	5	1	继发不孕	2.17	≤24	23.4	女方因素	8	3.11	1883	0.53	7	6.41	3.59	47	2	13	11	A-B	IVF	5	0	4	1	2	2	0	否	是	移植	已妊娠	生化妊娠	生化妊娠	生化妊娠
471	1	2017080054	杨玉男	≥35	37	1	降调节方案	3	313.333	＞10天	15	＞3000	4700	HCG	3	0	0	原发不孕	1.53	≤24	21.7	不明原因	6	1.51	1800	1.45	6	6.94	3.59	41	2	10	11	A-B	IVF	5	0	4	0	0	0	0	否	否	全胚冷冻
1200	1	C00018106	刘海霞	＜35	31	1	拮抗剂方案	2	300	≤10天	9	≤3000	2700	HCG	1	0	0	原发不孕	1.16	≤24	23	男方因素	4	1.12	1050.15	0.93	4	6.05	3.59	28.09	3	5	12.8	A	ICSI	4	0	2	0	2	2	0	否	是	移植	未妊娠
1643	0	C00015715	杜君霞	＜35	33	1	刺激方案	1	202.5	≤10天	10	≤3000	2025	HCG	2	0	0	原发不孕	0.57	≤24	20	混合因素	2	15.87	883	2.98	0	13.63	3.59	17	3	5				0	0	0	0	0	0	0	是		未取到卵
1696	0	2017030075	张华敏	≥35	39	1	降调节方案	3	225	≤10天	8	≤3000	1800	HCG	2	0	0	继发不孕	0.39	≤24	20.9	女方因素	2	1.89	761	0.18	2	9.26	3.59	43	4	5	10.7	B	IVF	2	0	2	0	2	2	0	否	是	移植	已妊娠	临床妊娠	宫内妊娠	单胚胎停
1891	1	C00016958	金晓红	≥35	39	1	刺激方案	1	300	≤10天	9	≤3000	2700	HCG	1	2	2	继发不孕	0.40	＞24	29.4	女方因素	2	7.28	305	0.76	1	9.26	3.59	43	4	5	0.58	B	IVF	1	0	1	0	0	0	0	否	否	全胚冷冻
1928	1	2017030056	陈明霞	≥35	45	1	降调节方案	3	300	≤10天	8	≤3000	2400	HCG	1	5	2	继发不孕	0.92	≤24	22.9	混合因素	2	3.97	456.45	0.5	2	6.94	3.59	41	4	10	9.5	A	ICSI	2	0	0	0	0	0	0	是		无可移植胚胎
2182	0	C00018489	金晓红	≥35	39	2	刺激方案	1	150	≤10天	7	≤3000	1050	HCG	1	2	2	继发不孕	0.43	＞24	29.4	女方因素	1	4.73	303.83	1.78	0	9.26	3.59	43	4	5	5.4	B-C		0	0	0	0	0	0	0	是		未取到卵
1449	1	2016070177	赵健玲	≥35	41	1	刺激方案	1	300	≤10天	9	≤3000	2700	HCG	3	1	1	继发不孕	0.4	＞24	26.3	女方因素	3	3.81	904	1.49	3	8.2	3.6	59.09	4	7	8.6	A	IVF	0	0	0	0	0	0	0	是		无可移植胚胎
1657	0	2017030239	赵健玲	≥35	42	2	刺激方案	1	275	＞10天	12	＞3000	3300	HCG	3	1	1	继发不孕	1.12	＞24	26.3	混合因素	2	4.16	848	1.15	0	8.2	3.6	59.09	4	5	8	B		0	0	0	0	0	0	0	是		未取到卵
1942	0	2018030166	商玉镯	＜35	32	1	刺激方案	1	150	≤10天	7	≤3000	1050	HCG	4	0	0	原发不孕	1.39	≤24	21.6	女方因素	2	9.1	404	0.68	3	10.29	3.6	57	1	6	7.6	A-B	IVF	1	0	1	0	0	0	0	否	否	全胚冷冻
11	1	C00012621	白姗姗	＜35	30	1	拮抗剂方案	2	404.167	＞10天	12	＞3000	4850	HCG	3	0	0	原发不孕	2.87	≤24	22.8	男方因素	10	1.14	2821	1.11	8	3.12	3.61	27	1	12	11	B	ICSI	4	0	0	0	0	0	0	是		无可移植胚胎
229	0	C00016829	张艳	≥35	41	1	拮抗剂方案	2	280.556	≤10天	9	≤3000	2525	HCG	2	0	0	原发不孕	1.30	＞24	24.2	女方因素	8	2.82	1402	0.83	5	7.22	3.61	39.72	2	9	12.3	A-B	IVF	4	0	0	0	0	0	0	是		无可移植胚胎
235	1	C00018013	张艳	≥35	41	2	降调节方案	3	311.25	≤10天	10	＞3000	3112.5	HCG	2	0	0	原发不孕	1.80	＞24	24.2	女方因素	8	2.29	1204	0.49	7	7.22	3.61	39.72	2	11	12.1	B	IVF	6	0	2	0	0	0	0	否	否	全胚冷冻
313	1	C00017104	栗金霞	≥35	39	1	刺激方案	1	450	≤10天	9	＞3000	4050	HCG	2	3	0	继发不孕	3.01	＞24	27.2	女方因素	7	7.86	2232	1.26	7	6.13	3.61	52	2	12	6.3	A	IVF	7	0	4	1	0	0	0	否	否	全胚冷冻
909	1	C00015292	柳海华	≥35	39	2	拮抗剂方案	2	357.143	≤10天	7	≤3000	2500	HCG	4	5	1	继发不孕	2.82	≤24	22	女方因素	4	2.53	968	1.29	3	7.81	3.61	53	2	8	10.9	A-B	IVF	3	0	2	0	2	2	0	否	是	移植	未妊娠
449	1	C00010387	孟凡捷	≥35	36	1	刺激方案	1	450	＞10天	12	＞3000	5400	HCG	3	2	1	继发不孕	1.81	＞24	28.8	女方因素	6	3.71	1798	1.2	5	10.16	3.62	18	2	11	0.74	A-B	IVF	4	0	4	0	0	0	0	否	否	全胚冷冻
645	0	C00018845	董丽燕	≥35	39	2	拮抗剂方案	2	225	≤10天	8	≤3000	1800	HCG	3	5	1	继发不孕	1.84	＞24	26.4	女方因素	5	2.22	881.53	0.82	5	8.95	3.62	10.81	2	9	9.5	B	IVF	4	2	2	2	0	0	0	否	否	全胚冷冻
753	1	C00017437	董丽燕	≥35	39	1	刺激方案	1	450	≤10天	7	＞3000	3150	双扳机	3	5	1	继发不孕	1.88	＞24	26.4	女方因素	5	6.01	1371	0.91	4	8.95	3.62	10.81	2	9	0.7	B-C	IVF	4	1	1	1	0	0	0	否	否	全胚冷冻
373	0	C00015653	吴秀荣	≥35	42	1	拮抗剂方案	2	283.333	≤10天	9	≤3000	2550	HCG	1	5	0	继发不孕	1.33	≤24	24	女方因素	7	1.73	1651	0.64	7	9.62	3.63	43	2	9	10.9	A	IVF	1	0	0	0	0	0	0	是		无可移植胚胎
903	1	C00018578	乔立娜	≥35	37	2	刺激方案	1	450	≤10天	10	＞3000	4500	HCG	2	1	1	继发不孕	4.11	＞24	25.7	女方因素	5	1.54	1244	0.56	8	9.67	3.63	28.02	2	13	5.4	B	IVF	4	1	3	0	0	0	0	否	否	全胚冷冻
920	0	C00013019	王立	≥35	39	1	刺激方案	1	225	≤10天	8	≤3000	1800	HCG	3	4	1	继发不孕	1.42	≤24	22.3	女方因素	4	3.32	934	0.48	1	9.62	3.63	43	2	11	0.97	A-B	IVF	0	0	0	0	0	0	0	是		无可移植胚胎
1239	0	2016120004	孙海霞	＜35	30	2	刺激方案	1	225	≤10天	9	≤3000	2025	HCG	5	0	0	原发不孕	1.56	≤24	22	男方因素	3	1.48	941	0.82	2	9.18	3.63	35.42	1	6	11.3	B	ICSI	0	0	0	0	0	0	0	是		无可移植胚胎
1670	1	C00018482	吴秀荣	≥35	42	2	拮抗剂方案	2	330	≤10天	10	＞3000	3300	HCG	2	5	0	继发不孕	1.38	≤24	24	男方因素	2	1.51	827.29	0.26	3	9.62	3.63	43	2	9	7.6	A-B	ICSI	1	0	2	0	2	2	0	否	是	移植	未妊娠
1957	0	2016040278	孙海霞	＜35	30	1	降调节方案	3	225	≤10天	6	≤3000	1350	HCG	5	0	0	原发不孕	1.89	≤24	22	女方因素	2	1.69	490	1.27	3	9.18	3.63	35.42	1	6	10.5	A-B	IVF	0	0	0	0	0	0	0	是		未受精
2095	0	2016090129	孙小淋	＜35	32	3	拮抗剂方案	2	225	≤10天	8	≤3000	1800	HCG	3	1	1	继发不孕	0.76	≤24	18.5	女方因素	1	3.69	483	1.98	1	9.62	3.63	43	3	3	12.6	A	IVF	0	0	0	0	0	0	0	是		未受精
816	0	2016030183	张淑华	＜35	30	1	降调节方案	3	239.423	＞10天	13	＞3000	3112.5	HCG	2	0	0	原发不孕	1.29	≤24	20.3	不明原因	5	3.58	1528	0.92	6	8.24	3.64	72	1	9	11.5	A	IVF	5	0	3	2	2	2	0	否	是	移植	未妊娠
325	0	C00012919	段瑜	＜35	30	2	拮抗剂方案	2	256.25	≤10天	8	≤3000	2050	HCG	3	0	0	原发不孕	3.76	≤24	19.1	男方因素	7	4.61	2129	1.12	7	6.95	3.65	39	1	12	11.5	A	ICSI	4	0	2	0	2	2	0	否	是	移植	已妊娠	临床妊娠	宫内妊娠	单胎宫内妊娠
854	0	C00015837	任玉翠	≥35	42	2	拮抗剂方案	2	288.462	＞10天	13	＞3000	3750	HCG	4	2	1	继发不孕	0.92	＞24	27.6	女方因素	5	5.25	1291	0.93	3	12.93	3.65	38	4	7	13.4	B	IVF	1	0	1	0	1	1	0	否	是	移植	未妊娠
1042	1	2016040031	张民	≥35	42	5	降调节方案	3	558.929	＞10天	14	＞3000	7825	HCG	9	1	1	继发不孕	0.42	≤24	19.5	混合因素	4	2.7	1784	1.28	2	15.37	3.65	18	4	3	11.5	B	ICSI	2	0	1	0	0	0	0	否	否	全胚冷冻
1078	1	2016040302	张民	≥35	42	6	降调节方案	3	387.5	≤10天	6	≤3000	2325	HCG	9	1	1	继发不孕	0.72	≤24	19.5	混合因素	4	7.59	1560	0.75	2	14.23	3.65	18	4	3	4.3		ICSI	1	0	1	0	0	0	0	否	否	全胚冷冻
1206	0	2018060129	昃青	≥35	36	1	降调节方案	3	200	≤10天	10	≤3000	2000	HCG	1	0	0	原发不孕	1.37	＞24	27.3	女方因素	4	1.63	1016	1.08	5	5.35	3.65	57	2	12	1.08	A	IVF	1	0	1	0	1	1	0	否	是	移植	已妊娠	临床妊娠	宫内妊娠	单胎宫内妊娠
1519	0	C00011695	段瑜	＜35	30	1	拮抗剂方案	2	262.5	≤10天	8	≤3000	2100	HCG	3	0	0	原发不孕	1.86	＞24	25	女方因素	3	7.77	844.63	0.94	3	6.95	3.65	39	1	9	0.9	A	IVF	0	0	0	0	0	0	0	否	否	全胚冷冻
1580	0	C00015049	任玉翠	≥35	41	1	拮抗剂方案	2	241.667	≤10天	9	≤3000	2175	HCG	4	2	1	继发不孕	1.77	＞24	27.6	混合因素	3	17.85	1048	1.32		12.93	3.65	38	2	7	12.4	C		0	0	0	0	0	0	0	是		未取卵
1645	0	C00018699	杨俊玲	≥35	40	2	拮抗剂方案	2	225	≤10天	7	≤3000	1575	HCG	1	3	0	继发不孕	0.26	≤24	20.9	女方因素	2	7.9	873.76	0.35	2	10.77	3.65	35	4	5	12.7	A	IVF	1	0	1	1	1	1	0	否	是	移植	未妊娠
1712	1	C00016405	任玉翠	≥35	42	3	降调节方案	3	300	≤10天	8	≤3000	2400	HCG	4	2	1	继发不孕	1.03	＞24	27.6	混合因素	2	3.35	727	0.42	4	12.93	3.65	38	4	7	12	A-B	ICSI	3	0	0	0	0	0	0	是		无可移植胚胎
1821	1	2016090072	张民	≥35	43	7	降调节方案	3	375	≤10天	6	≤3000	2250	HCG	9	1	1	继发不孕	0.72	≤24	19.5	混合因素	2	5.46	509	0.87	2	14.23	3.65	18	4	3	4.7		ICSI	2	0	1	0	0	0	0	否	否	全胚冷冻
133	0	2017030203	黄玲玲	＜35	26	1	降调节方案	3	156.25	＞10天	12	≤3000	1875	HCG	1	4	0	继发不孕	2.27	≤24	20	女方因素	8	1.07	1690	0.97	9	6.52	3.66	44	1	18	8.3	B	IVF	6	0	4	1	2	2	0	否	是	移植	已妊娠	临床妊娠	宫内妊娠	双胎宫内妊娠
250	0	2017020052	蒋茜玺	＜35	27	1	降调节方案	3	231.25	＞10天	12	≤3000	2775	HCG	2	0	0	原发不孕	2.91	≤24	20.7	女方因素	7	2.59	1774	0.51	4	14.52	3.66	44	1	15	17.1	A	IVF	4	0	0	0	0	0	0	是		无可移植胚胎
863	0	C00006766	牛永香	≥35	36	2	降调节方案	3	286.765	＞10天	17	＞3000	4875	HCG	5	4	1	继发不孕	2.36	≤24	22.3	女方因素	5	1.54	1244	0.56	6	7.15	3.66	40.21	2	9	13.7	A	IVF	4	0	2	0	2	2	0	否	是	移植	未妊娠
1600	1	C00008195	汪芳	＜35	31	1	刺激方案	1	375	≤10天	10	＞3000	3750	HCG	2	1	0	继发不孕	1.78	≤24	19	男方因素	3	5.67	912	0.79	2	7.24	3.66	26	1	7	4.1	A	ICSI	1	0	1	1	0	0	0	否	否	全胚冷冻
1716	0	C00010950	牛芳	＜35	33	2	拮抗剂方案	2	225	≤10天	8	≤3000	1800	HCG	1	1	0	继发不孕	2.6	＞24	25.6	男方因素	2	1.12	718	0.4	4	7.72	3.66	36	1	8	9.2	A	IVF	3	0	1	0	1	1	0	否	是	移植	未妊娠
1793	1	C00018263	孙萍萍	≥35	39	1	拮抗剂方案	2	360.714	≤10天	7	≤3000	2525	HCG	5	1	1	继发不孕	1.77	＞24	28.2	混合因素	2	8.59	552.88	0.63	2	7.9	3.66	87.26	2	6	8.4	A	ICSI	1	0	0	0	0	0	0	是		无可移植胚胎
803	0	2017090068	曹薇	≥35	37	1	降调节方案	3	225	≤10天	9	≤3000	2025	HCG	3	2	1	继发不孕	1.53	＞24	24.7	混合因素	5	3.19	1610	0.84	6	8.96	3.67	25.7	2	18	12.3	A	ICSI	5	0	3	1	0	0	0	否	否	全胚冷冻
1173	0	2018070091	王芬	＜35	29	3	刺激方案	1	241.667	≤10天	9	≤3000	2175	HCG	5	0	0	原发不孕	0.52	≤24	21.1	男方因素	4	13.25	1159	1.36	3	6.9	3.67	42.91	3	5	6	B-C	ICSI	0	0	0	0	0	0	0	是		无可移植胚胎
1321	0	C00012985	李九荣	≥35	39	1	刺激方案	1	225	≤10天	5	≤3000	1125	HCG	8	3	1	继发不孕	0.41	≤24	22.5	女方因素	3	14.16	692	0.53	3	6.9	3.67	42.91	4	5	6.8	B-C	IVF	3	0	2	0	0	0	0	否	否	全胚冷冻
1407	1	C00016184	李九荣	≥35	40	2	刺激方案	1	300	≤10天	8	≤3000	2400	HCG	8	3	1	继发不孕	1.57	≤24	22.5	女方因素	3	8.77	869	1.78	4	6.9	3.67	42.91	2	6	8.5	B	IVF	2	0	0	0	0	0	0	是		无可移植胚胎
1879	1	2016060184	崔自娟	≥35	37	1	降调节方案	3	325	≤10天	9	≤3000	2925	HCG	3	3	1	继发不孕	3.18	≤24	23	女方因素	2	0.69	283	2.24	1	6.76	3.67	30	2	7	8.8	A	IVF	0	0	0	0	0	0	0	是		无可移植胚胎
2145	1	2018050032	岳艳辉	≥35	42	1	降调节方案	3	350	≤10天	9	＞3000	3150	HCG	2	2	2	继发不孕	1.37	≤24	21.4	混合因素	9	1.81	1781	1.02	9	8.13	3.67	40.1	2	12	8.4		ICSI	9	0	3	0	0	0	0	否	否	全胚冷冻
2279	0	2017100086	张春艳	＜35	32	6	刺激方案	1	234.783	＞10天	23	＞3000	5400	HCG	6	0	0	原发不孕	0.20	＞24	26.7	女方因素	1	7.05	298	0.42	0	6.9	3.67	42.91	3	3				0	0	0	0	0	0	0	是		未取到卵
409	0	2017090025	任惠惠	＜35	30	1	降调节方案	3	246.154	＞10天	13	＞3000	3200	HCG	3	1	0	继发不孕	2.31	＞24	24.5	女方因素	7	1.39	1234	0.85	7	7.8	3.68	35.23	1	16	10.7	A	IVF	5	0	2	0	2	2	0	否	是	移植	已妊娠	临床妊娠	宫内妊娠	单胎宫内妊娠
563	0	2018030250	杨燕	＜35	33	2	刺激方案	1	225	≤10天	8	≤3000	1800	HCG	3	1	0	继发不孕	1.6	≤24	17.7	男方因素	6	11.82	1814	1.6	7	8.79	3.68	72	1	10	4.4	A	IVF	7	0	2	1	0	0	0	否	否	全胚冷冻
705	0	2017060004	杨燕	＜35	32	1	刺激方案	1	283.333	≤10天	9	≤3000	2550	HCG	3	1	0	继发不孕	1.72	≤24	17.7	女方因素	5	11.49	1668.44	1.67	4	8.79	3.68	72	1	10	5.1	A	IVF	3	0	2	0	0	0	0	否	否	全胚冷冻
736	1	C00003412	曾凡华	≥35	39	1	降调节方案	3	300	＞10天	11	＞3000	3300	HCG	1	3	1	继发不孕	1.42	≤24	23.2	女方因素	5	1.66	1469	0.51	8	8.05	3.69	44	2	13	11.8	A-B	IVF	1	0	1	0	1	1	0	否	是	移植	未妊娠
763	1	2016030276	卜淑娟	≥35	35	4	降调节方案	3	305.357	＞10天	14	＞3000	4275	HCG	5	3	0	继发不孕	2.20	≤24	16.4	女方因素	5	1.17	1863	2.13	3	9.65	3.69	38.08	2	7	10.7	A	IVF	3	1	1	0	0	0	0	否	否	全胚冷冻
769	0	2016110215	王萌	＜35	28	1	刺激方案	1	225	≤10天	9	≤3000	2025	HCG	3	0	0	继发不孕	2.29	≤24	17.7	女方因素	5	2.13	1806	3.87	6	12.34	3.69	52	1	8	11.2	A	IVF	5	0	0	0	0	0	0	是		无可移植胚胎
1930	0	C00012659	董丽丽	≥35	35	1	刺激方案	1	187.5	≤10天	8	≤3000	1500	HCG	5	1	0	继发不孕	2.17	≤24	22.5	女方因素	2	23	451	1.38	2	8.05	3.69	44	2	6	6.3	B	IVF	2	0	2	1	0	0	0	否	否	全胚冷冻
2141	0	C00017286	刘金兰	≥35	42	1	拮抗剂方案	2	175	≤10天	6	≤3000	1050	双扳机	1	4	1	继发不孕	1.03	＞24	24.5	女方因素	1	6.67	386	0.55	1	6.7	3.69	27	4	7	7.5	A	IVF	1	0	1	0	0	0	0	否	否	全胚冷冻
639	0	C00012644	李明娟	≥35	36	1	刺激方案	1	200	＞10天	12	≤3000	2400	HCG	8	2	1	继发不孕	1.69	＞24	34.3	女方因素	6	0.81	1161	0.56	4	5.8	3.7	18.86	2	11	1.1	A	IVF	0	1	1	0	0	0	0	否	否	全胚冷冻
894	1	C00018469	舒丽	≥35	39	3	拮抗剂方案	2	300	≤10天	9	≤3000	2700	HCG	2	1	0	继发不孕	2.42	≤24	23.1	混合因素	5	0.96	1054	1.13	7	15.61	3.7	27.5	2	11	8.7	A	ICSI	6	0	4	1	2	2	0	否	是	移植	已妊娠	临床妊娠	宫内妊娠	单胎宫内妊娠
178	0	C00016567	张凤红	≥35	42	2	降调节方案	3	240	≤10天	10	≤3000	2400	HCG	7	3	1	继发不孕	1.57	＞24	24.6	女方因素	8	2.88	2345	0.86	6	6.51	3.71	47	2	20	13.2	A	IVF	4	1	2	1	1	1	0	否	是	移植	未妊娠
252	0	2016050253	史长红	≥35	40	1	拮抗剂方案	2	240.625	≤10天	8	≤3000	1925	HCG	1	3	1	继发不孕	1.68	≤24	23.6	女方因素	4	10.4	812	0.67	6	6.98	3.71	47.71	2	10	7.7	A	IVF	6	0	4	2	2	2	0	否	是	移植	已妊娠	临床妊娠	宫内妊娠	单胚胎停
653	1	2016020100	韩燕子	＜35	32	1	刺激方案	1	346.154	＞10天	13	＞3000	4500	HCG	1	1	0	继发不孕	1.734	＞24	33.5	女方因素	5	3.27	750	0.49	3	10.75	3.71	28	1	7	16.3	B	IVF	2	0	1	1	0	0	0	否	否	全胚冷冻
813	0	2016100051	燕国英	≥35	44	2	刺激方案	1	283.333	≤10天	9	≤3000	2550	HCG	1	4	1	继发不孕	0.55	≤24	22.5	女方因素	5	1.43	1548	1.56	6	9.92	3.71	39.5	4	7	9.1	A	IVF	6	0	4	0	0	0	0	否	否	全胚冷冻
822	0	C00015497	王娟	≥35	41	1	拮抗剂方案	2	210	≤10天	10	≤3000	2100	HCG	3	1	1	继发不孕	1.9	≤24	19.5	男方因素	5	3.94	1478	1.04	4	7.01	3.71	50	2	9	9.7	A	IVF	2	1	3	2	2	2	0	否	是	移植	已妊娠	临床妊娠	宫内妊娠	单胚胎停
842	1	C00006569	范翔雪	＜35	32	1	降调节方案	3	444.643	＞10天	14	＞3000	6225	HCG	4	0	0	原发不孕	1.72	≤24	19.3	女方因素	5	2.6	1369	0.55	5	8.84	3.71	36	1	12	1.45	B	IVF	2	0	1	0	1	1	0	否	是	移植	未妊娠
1576	1	C00012984	刘静	≥35	40	5	降调节方案	3	300	≤10天	8	≤3000	2400	HCG	6	2	1	继发不孕	1.03	≤24	20.2	女方因素	3	1.93	1064	2.38	3	6.98	3.71	38	4	7	10	B	IVF	1	0	1	1	0	0	0	否	否	全胚冷冻
1638	1	C00006760	刘静	≥35	39	4	降调节方案	3	292.5	≤10天	10	≤3000	2925	HCG	5	2	1	继发不孕	0.99	≤24	20.2	女方因素	2	1.42	890	2.24	2	6.98	3.71	38	4	6	0.97	B	IVF	2	0	2	2	0	0	0	否	否	全胚冷冻
1896	1	2017110110	燕国英	≥35	45	3	降调节方案	3	300	≤10天	9	≤3000	2700	HCG	1	4	1	继发不孕	1.090	≤24	22.5	女方因素	2	0.79	394	0.65	2	9.92	3.71	38	4	4	8.4	A	IVF	1	0	1	0	2	2	0	否	是	移植	未妊娠
8	0	2017070128	王孟艳	＜35	27	1	降调节方案	3	173.077	＞10天	13	≤3000	2250	HCG	3	1	0	继发不孕	3.56	≤24	20.3	女方因素	10	0.58	2008	0.85	5	7.55	3.72	49.09	1	14	15.3	A-B	IVF	2	0	2	0	0	0	0	否	否	全胚冷冻
384	0	2017020093	张建春	≥35	39	1	降调节方案	3	183.333	≤10天	9	≤3000	1650	HCG	2	1	0	继发不孕	1.53	≤24	21	女方因素	7	3.7	1579	0.14	8	7.42	3.72	65.69	2	10	13.2	A-B	IVF	4	0	3	1	1	1	0	否	是	移植	已妊娠	临床妊娠	宫内妊娠	单胎宫内妊娠
1765	1	2017050037	王玉方	≥35	45	1	刺激方案	1	450	≤10天	6	≤3000	2700	HCG	3	6	1	继发不孕	0.54	≤24	23	女方因素	2	6.4	607	1.08	2	16.05	3.73	91	4	3	14.9	A-B	IVF	2	0	2	2	0	0	0	否	否	全胚冷冻
328	1	2017020107	范秋玲	≥35	39	4	降调节方案	3	350	≤10天	10	＞3000	3500	HCG	4	2	1	继发不孕	0.9	≤24	23.4	男方因素	7	1.45	2119	1.38	4	11.86	3.74	67	4	7	14.9	A	ICSI	4	0	4	2	2	2	0	否	是	移植	未妊娠
510	1	2017040139	赵宝军	≥35	41	2	刺激方案	1	375	≤10天	9	＞3000	3375	HCG	4	1	1	继发不孕	1.45	≤24	23.3	混合因素	6	3.59	2369	0.57	9	10.42	3.74	40	2	9	13.4	B	ICSI	2	0	1	0	1	1	0	否	是	移植	未妊娠
838	0	C00012273	王剑非	≥35	44	1	拮抗剂方案	2	278.571	≤10天	7	≤3000	1950	HCG	1	3	1	继发不孕	1.04	≤24	21.5	女方因素	5	5.56	1401	0.27	3	12.36	3.74	56.56	4	7	10.1	A-B	IVF	1	0	1	0	1	1	0	否	是	移植	未妊娠
1282	1	2017100175	王凤芹	≥35	43	2	刺激方案	1	300	＞10天	13	＞3000	3900	HCG	3	4	4	继发不孕	0.64	＞24	24.8	混合因素	3	2.86	829	0.75	3	7.7	3.74	25	4	4	11.1	B	ICSI	2	0	2	0	2	2	0	否	是	移植	未妊娠
1516	1	C00012401	王凤芹	≥35	46	6	刺激方案	1	300	＞10天	12	＞3000	3600	HCG	5	4	1	继发不孕	1.09	＞24	24.8	女方因素	3	10.05	860	1.03	2	7.7	3.74	25	4	4	0.88	B	IVF	1	0	1	0	0	0	0	否	否	全胚冷冻
1538	0	C00016856	张俊丽	＜35	33	1	拮抗剂方案	2	200	≤10天	8	≤3000	1600	HCG	1	3	2	继发不孕	2.06	≤24	23.4	女方因素	3	5.67	1188	0.79	3	8.57	3.74	49	1	9	1.07	A	IVF	2	1	3	0	2	2	0	否	是	移植	未妊娠
1901	1	2017060014	王爱美	≥35	41	1	拮抗剂方案	2	358.333	≤10天	9	＞3000	3225	HCG	2	2	1	继发不孕	1.89	≤24	23.4	男方因素	4	2.85	917	1.01	5	10.31	3.74	68.08	2	9	10.8	A-B	ICSI	3	0	3	3	2	2	0	否	是	移植	未妊娠
1986	0	C00012841	王剑非	≥35	44	2	刺激方案	1	278.571	≤10天	7	≤3000	1950	HCG	1	3	1	继发不孕	0.89	≤24	21.5	女方因素	2	18.15	383	0.5	2	7.49	3.74	45.67	4	7	7.5	B	IVF	1	0	0	0	0	0	0	是		无可移植胚胎
2103	1	C00009718	王凤芹	≥35	45	4	刺激方案	1	450	≤10天	7	＞3000	3150	HCG	5	4	1	继发不孕	0.75	＞24	24.8	混合因素	1	12.55	463	0.44	0	7.7	3.74	25	4	4	0.67	C		0	0	0	0	0	0	0	是		未取到卵
1476	1	2016080240	尹芳	＜35	32	8	刺激方案	1	300	≤10天	7	≤3000	2100	HCG	2	1	0	继发不孕	0.77	≤24	20.5	女方因素	3	9.28	885	2.11	3	9.9	3.75	89	3	4	4.3	A	IVF	1	0	0	0	0	0	0	是		无可移植胚胎
1810	0	2016080075	尹芳	＜35	32	7	刺激方案	1	214.286	≤10天	7	≤3000	1500	HCG	2	1	0	继发不孕	0.95	≤24	20.5	女方因素	2	4.22	529	0.76	2	9.9	3.75	89	3	4	7.5	A-B	IVF	2	0	0	0	0	0	0	是		无可移植胚胎
2226	1	2017030310	池汶娟	≥35	35	1	降调节方案	3	325	＞10天	12	＞3000	3900	HCG	1	2	1	继发不孕	1.3	≤24	23.4	混合因素	1	9.77	175	3.67	0	8.6	3.75	59.09	2	8	11	A		0	0	0	0	0	0	0	是		未取到卵
1997	0	2018050229	孙颂华	≥35	44	1	刺激方案	1	225	≤10天	10	≤3000	2250	HCG	3	6	1	继发不孕	0.22	≤24	22.4	女方因素	2	1.69	490	1.27	2	7.69	3.76	63.39	4	8	6.4	B	IVF	2	0	2	1	0	0	0	否	否	全胚冷冻
2074	0	C00007130	王欣	≥35	49	1	拮抗剂方案	2	187.5	≤10天	8	≤3000	1500	双扳机	6	2	1	继发不孕	0.27	＞24	26	混合因素	1	4.12	549	1.67	1	8.26	3.76	30	4	5	9.7	A	ICSI	0	0	0	0	0	0	0	是		无可移植胚胎
625	1	C00014350	赵同芳	≥35	38	1	刺激方案	1	309.375	≤10天	8	≤3000	2475	HCG	8	1	1	继发不孕	4.45	＞24	31.3	男方因素	6	2.47	1184	0.75	7	4.1	3.77	89.87	2	11	0.9	B	ICSI	4	0	2	0	2	2	0	否	是	移植	未妊娠
786	1	2017060220	路克英	≥35	47	4	刺激方案	1	300	≤10天	9	≤3000	2700	HCG	1	1	1	继发不孕	0.5	＞24	25.8	女方因素	5	5.04	1702	0.88	5	5.67	3.77	15.08	4	7	9	A	IVF	4	0	2	1	0	0	0	否	否	全胚冷冻
986	0	2017060275	王美荣	≥35	43	1	拮抗剂方案	2	203.125	≤10天	8	≤3000	1625	HCG	2	2	2	继发不孕	1.54	≤24	22.3	女方因素	4	3	1335	0.48	9	7.54	3.78	59.86	2	9	16.3	A	IVF	4	0	2	0	0	0	0	否	否	全胚冷冻
994	1	C00011927	郭黎丽	≥35	43	1	拮抗剂方案	2	391.667	≤10天	9	＞3000	3525	HCG	2	1	1	继发不孕	1.86	＞24	25.4	女方因素	4	2.86	1304	0.97	5	8.58	3.78	65	2	12	0.83	A	IVF	4	0	2	1	1	1	0	否	是	移植	未妊娠
1309	1	C00003404	王兆君	＜35	33	3	刺激方案	1	364.286	＞10天	14	＞3000	5100	HCG	4	1	0	继发不孕	0.22	≤24	22.4	女方因素	3	7.12	737	1.04	1	5.16	3.78	31	3	4	10.2	B-C	IVF	0	0	0	0	0	0	0	是		未受精
1694	0	C00015759	焦金花	≥35	48	1	拮抗剂方案	2	278.571	≤10天	7	≤3000	1950	HCG	2	2	2	继发不孕	0.76	＞24	25.7	混合因素	2	9.35	767	0.95		5.53	3.78	62	4	2	13.4	A		0	0	0	0	0	0	0	是		未取卵
1082	0	2018020044	曹月红	＜35	31	1	刺激方案	1	150	≤10天	7	≤3000	1050	HCG	1	1	0	继发不孕	1.41	≤24	24	女方因素	4	7.85	1533	0.55	4	7.12	3.79	35	1	7	8.2	A	IVF	3	0	2	0	0	0	0	否	否	全胚冷冻
2166	1	C00015091	张丽	≥35	42	1	拮抗剂方案	2	325	≤10天	8	≤3000	2600	HCG	1	3	1	继发不孕	0.85	≤24	23.7	男方因素	1	5.11	326	0.48	2	12.6	3.79	47	4	4	11.8	A	ICSI	1	0	1	0	1	1	0	否	是	移植	未妊娠
124	0	C00015536	肖娜娜	＜35	31	1	降调节方案	3	225	≤10天	9	≤3000	2025	HCG	2	0	0	原发不孕	3.11	≤24	22.8	女方因素	8	0.19	1996	1.03	9	5.86	3.8	53	1	14	1.14	A-B	IVF	2	0	2	0	2	2	0	否	是	移植	未妊娠
319	1	2017110192	刘秀蓬	≥35	43	2	降调节方案	3	300	≤10天	9	≤3000	2700	HCG	5	3	1	继发不孕	0.46	≤24	21.5	混合因素	7	1.22	2178	0.73	6	10.37	3.8	57	4	7	6.3	B-C	ICSI	5	0	2	1	0	0	0	否	否	全胚冷冻
375	0	C00017756	刘春娥	≥35	42	1	刺激方案	1	288.462	＞10天	13	＞3000	3750	HCG	1	2	1	继发不孕	2.66	＞24	27.3	混合因素	7	6.75	1618	0.31	7	9.49	3.8	35	2	10	6.3	A-B	ICSI	2	0	2	0	0	0	0	否	否	全胚冷冻
628	0	2017080123	刘秀蓬	≥35	42	1	拮抗剂方案	2	206.25	≤10天	8	≤3000	1650	HCG	5	3	1	继发不孕	0.47	≤24	21.5	混合因素	6	2.72	1121	0.74	4	10.37	3.8	57	4	7	7	B	ICSI	3	0	0	0	0	0	0	是		无可移植胚胎
1889	1	2016030252	许彦华	≥35	44	1	刺激方案	1	450	≤10天	7	＞3000	3150	HCG	1	1	1	继发不孕	0.13	≤24	23.8	混合因素	2	4.5	439	1.32	1	10.7	3.8	87.47	4	3	9.6	A-B	ICSI	1	0	1	0	0	0	0	否	否	全胚冷冻
477	1	C00012360	西翠翠	≥35	37	1	拮抗剂方案	2	321.154	＞10天	13	＞3000	4175	双扳机	1	5	1	继发不孕	1.70	≤24	23.9	女方因素	6	4.53	1761	0.96	6	7.19	3.81	32.5	2	11	15.1	A-B	IVF	5	0	2	0	0	0	0	否	否	全胚冷冻
604	1	2018050216	孟令华	＜35	32	2	刺激方案	1	337.5	≤10天	10	＞3000	3375	HCG	1	3	1	继发不孕	1.95	≤24	21.7	不明原因	6	10.87	1465	1.1	4	8.45	3.81	56.76	1	11	6.8	B	IVF	3	0	2	0	0	0	0	否	否	全胚冷冻
967	0	2017080091	孟令华	＜35	32	1	刺激方案	1	247.5	≤10天	10	≤3000	2475	HCG	4	2	1	继发不孕	2.89	≤24	21.7	女方因素	4	9.4	1392	0.8	6	8.45	3.81	56.76	1	11	7.8	B	IVF	3	0	2	2	0	0	0	否	否	全胚冷冻
1533	1	C00017954	盖倩楠	＜35	27	1	刺激方案	1	365	＞10天	15	＞3000	5475	HCG	2	2	0	继发不孕	3.79	≤24	19.5	女方因素	3	21.58	1222.45	1.74	2	17	3.81	12	1	12			IVF	1	0	0	0	0	0	0	是		无可移植胚胎
1644	1	C00010567	王文平	≥35	39	1	拮抗剂方案	2	364.286	≤10天	7	≤3000	2550	HCG	0	1	0	继发不孕	0.14	≤24	20.1	女方因素	2	5.17	883	1.46	3	8.6	3.81	63	4	6	5.7	A	IVF	2	0	2	2	2	2	0	否	是	移植	未妊娠
945	0	C00018418	梁爽	＜35	32	2	降调节方案	3	273.214	＞10天	14	＞3000	3825	HCG	2	0	0	原发不孕	1.390	＞24	25.8	女方因素	4	9.07	743.71	0.82	3	7.24	3.82	25.4	1	11	11.4	A-B	IVF	1	0	1	0	1	1	0	否	是	移植	已妊娠	临床妊娠	宫内妊娠	单胎宫内妊娠
1233	1	2017070007	李晓	＜35	27	2	拮抗剂方案	2	300	≤10天	9	≤3000	2700	HCG	4	2	0	继发不孕	0.61	≤24	22.2	混合因素	3	3.97	962	0.44	2	15.2	3.82	55.78	3	3	10.4	A	ICSI	2	0	2	1	2	2	0	否	是	移植	已妊娠	临床妊娠	宫内妊娠	单胎宫内妊娠
1264	1	2017040181	李平	≥35	35	3	降调节方案	3	314.062	＞10天	16	＞3000	5025	HCG	5	0	0	原发不孕	1.63	＞24	25.9	男方因素	3	16.5	883	0.8	3	10.39	3.82	56.76	2	7	14.7	A-B	ICSI	5	0	4	0	0	0	0	否	否	全胚冷冻
1359	1	C00017097	梁爽	＜35	32	1	降调节方案	3	313.333	＞10天	15	＞3000	4700	HCG	2	0	0	原发不孕	2.84	＞24	25.8	女方因素	3	0.83	551	0.83	1	7.24	3.82	25.4	1	11	15.3	A-B	IVF	1	0	0	0	0	0	0	是		无可移植胚胎
1616	1	2016070060	苏桂华	≥35	41	4	拮抗剂方案	2	300	≤10天	9	≤3000	2700	HCG	1	1	1	继发不孕	2.26	≤24	18.9	女方因素	2	0.95	961	0.26	2	10.67	3.82	39.09	2	5	9.4	B	IVF	2	0	2	0	0	0	0	否	否	全胚冷冻
2252	1	2017060042	李晓	＜35	27	1	拮抗剂方案	2	332.143	≤10天	7	≤3000	2325	HCG	4	2	0	继发不孕	0.51	≤24	22.2	混合因素	1	9.65	433	2.5	1	15.2	3.82	18	3	2	7			0	0	0	0	0	0	0	是		未行授精
245	1	C00004623	牌树珍	≥35	37	2	刺激方案	1	375	≤10天	10	＞3000	3750	HCG	3	2	1	继发不孕	1.81	≤24	21.6	混合因素	7	6.76	1920	3.05	7	7.11	3.83	70.1	2	10	4.1	A	ICSI	6	0	4	2	0	0	0	否	否	全胚冷冻
439	1	2016110190	郭璟	≥35	41	2	拮抗剂方案	2	602.273	＞10天	11	＞3000	6625	HCG	5	1	1	继发不孕	0.83	≤24	20.2	混合因素	6	1.52	1784	1.43	4	9.7	3.83	93.36	4	5	8.9	A	ICSI	4	0	2	1	2	2	0	否	是	移植	未妊娠
756	1	2017090026	牌树珍	≥35	36	1	刺激方案	1	375	＞10天	11	＞3000	4125	HCG	3	0	0	继发不孕	2.68	≤24	21.6	混合因素	5	5.85	1362	2.13	5	7.11	3.83	80.1	2	10	6	A	ICSI	1	0	1	0	0	0	0	否	否	全胚冷冻
1065	0	2017030190	郭璟	≥35	41	3	降调节方案	3	287.5	＞10天	12	＞3000	3450	HCG	5	1	1	继发不孕	0.35	≤24	20.2	混合因素	4	2.42	1624	1.48	3	9.7	3.83	95.42	4	5	9.7	A	ICSI	2	0	2	2	2	2	0	否	是	移植	未妊娠
1214	1	2018040283	郭璟	≥35	42	4	降调节方案	3	322.5	≤10天	10	＞3000	3225	HCG	5	1	1	继发不孕	0.989	≤24	20.2	男方因素	4	11.01	1149	1.08	5	9.7	3.83	44	4	5	8.1	A	ICSI	3	0	2	0	2	2	0	否	是	移植	未妊娠
1441	1	2016100227	郭璟	≥35	41	1	降调节方案	3	328.125	≤10天	8	≤3000	2625	HCG	5	1	1	继发不孕	0.78	≤24	20.2	混合因素	3	12.88	926	1.05	2	9.7	3.83	93.36	4	5	7.8	A	ICSI	1	0	1	0	0	0	0	否	否	全胚冷冻
503	1	C00012113	赵薇	≥35	39	1	刺激方案	1	300	≤10天	10	≤3000	3000	HCG	3	1	0	继发不孕	1.2	≤24	20.4	女方因素	6	9.92	2446	1.92	4	6.46	3.84	70.27	2	8	1.06	A-B	IVF	4	0	3	0	0	0	0	否	否	全胚冷冻
527	0	C00016345	朱玉婷	＜35	26	1	降调节方案	3	198.75	＞10天	20	＞3000	3975	HCG	3	0	0	原发不孕	2.47	＞24	24.3	女方因素	6	2.46	2170	0.97	5	12.28	3.84	39	1	12	12.7	A	IVF	0	0	0	0	0	0	0	是		无可移植胚胎
636	1	2017100111	崔静丹	≥35	37	1	降调节方案	3	301.923	＞10天	13	＞3000	3925	HCG	1	4	3	继发不孕	2.03	≤24	21.5	男方因素	6	0.62	1268	1.1	5	8.23	3.84	36.43	2	11			IVF	3	0	2	0	2	2	0	否	是	移植	未妊娠
877	1	C00013108	姜桂霞	≥35	44	3	刺激方案	1	300	＞10天	15	＞3000	4500	HCG	2	2	1	继发不孕	0.52	＞24	28.1	女方因素	5	19.09	1166	1.02	1	13.13	3.84	93.36	4	5	0.56	A-B	IVF	0	0	0	0	0	0	0	是		无可移植胚胎
1799	0	C00011680	姜桂霞	≥35	44	2	刺激方案	1	225	≤10天	9	≤3000	2025	HCG	2	2	1	继发不孕	0.20	＞24	28.1	女方因素	2	14	541	0.26	2	13.13	3.84	93.36	4	4	0.53	B	IVF	0	0	0	0	0	0	0	是		无可移植胚胎
1996	1	C00010652	姜桂霞	≥35	43	1	刺激方案	1	450	＞10天	12	＞3000	5400	HCG	1	2	1	继发不孕	0.42	＞24	28.1	女方因素	2	6.29	494	0.36	3	13.13	3.84	93.36	4	5	0.52	B	IVF	0	0	0	0	0	0	0	是		无可移植胚胎
2063	0	C00010825	苏风杰	≥35	48	2	拮抗剂方案	2	234.375	≤10天	8	≤3000	1875	HCG	9	3	1	继发不孕	0.76	＞24	26.7	女方因素	1	6.72	590	0.44	1	13.41	3.85	10	4	3	13.3	B	IVF	1	0	1	0	1	1	0	否	是	移植	未妊娠
2174	0	C00012216	苏风杰	≥35	48	4	拮抗剂方案	2	200	≤10天	8	≤3000	1600	HCG	10	3	1	继发不孕	0.75	＞24	26.7	女方因素	1	8.56	315	0.56	1	13.41	3.85	10	4	3	13.4	A	IVF	1	0	1	0	1	1	0	否	是	移植	未妊娠
2211	0	C00009646	苏风杰	≥35	47	1	拮抗剂方案	2	150	≤10天	10	≤3000	1500	HCG	9	3	1	继发不孕	0.77	＞24	26.7	女方因素	1	7.72	239	1.36	1	13.41	3.85	10	4	3	1.37	A	IVF	0	0	0	0	0	0	0	是		无可移植胚胎
296	0	C00017434	尹凤英	＜35	24	1	拮抗剂方案	2	270	≤10天	10	≤3000	2700	HCG	3	0	0	原发不孕	3.41	＞24	24.2	男方因素	7	2.48	2705	2.55	8	7.41	3.86	30	1	12	1.16	A	ICSI	4	0	4	1	0	0	0	否	否	全胚冷冻
758	1	2016080189	石美英	≥35	37	1	刺激方案	1	418.75	＞10天	12	＞3000	5025	HCG	1	1	1	继发不孕	1.43	≤24	22.3	女方因素	5	0.58	1346	0.45	6	9.48	3.86	67.09	2	8	8.6	A-B	IVF	3	0	2	0	0	0	0	否	否	全胚冷冻
1098	0	2018030198	郭英霞	≥35	42	5	拮抗剂方案	2	238.636	＞10天	11	≤3000	2625	双扳机	1	2	1	继发不孕	1.24	＞24	30.8	女方因素	4	3.13	1454	1.06	4	11.75	3.86	16	2	7	7.2	B	IVF	4	0	2	0	2	2	0	否	是	移植	未妊娠
1319	1	2017030254	王娜	≥35	35	1	降调节方案	3	425	≤10天	7	≤3000	2975	HCG	3	0	0	原发不孕	1.43	＞24	25.8	混合因素	3	9.35	703	1.03	3	8.59	3.86	34.56	2	8	8.9	A	ICSI	2	0	1	0	0	0	0	否	否	全胚冷冻
2114	0	2017120007	郭英霞	≥35	41	4	刺激方案	1	225	≤10天	8	≤3000	1800	HCG	1	2	1	继发不孕	1.24	＞24	30.8	女方因素	1	11.11	448	0.49	2	11.75	3.86	16	2	7	7.6	A	IVF	2	0	1	0	0	0	0	否	否	全胚冷冻
2118	0	2017110031	郭英霞	≥35	41	3	刺激方案	1	150	≤10天	7	≤3000	1050	HCG	1	2	1	继发不孕	1.24	＞24	30.8	混合因素	1	10.92	441	0.36	0	11.75	3.86	16	2	7	7.1	A		0	0	0	0	0	0	0	是		未取到卵
1429	1	2016100110	李春光	≥35	37	1	刺激方案	1	300	≤10天	8	≤3000	2400	HCG	3	0	0	继发不孕	1.05	＞24	25	女方因素	3	3.36	962	1.38	2	9.04	3.87	67.5	4	6	18.3	A	IVF	2	0	0	0	0	0	0	是		无可移植胚胎
1627	1	2017050017	李小红	≥35	40	1	降调节方案	3	302.273	＞10天	11	＞3000	3325	HCG	4	1	1	继发不孕	0.69	≤24	19.1	男方因素	2	0.76	918	0.43	3	14.86	3.87	67.61	4	6	11	B	ICSI	3	0	3	2	2	2	0	否	是	移植	未妊娠
295	0	2017070003	孙萍萍	＜35	33	2	刺激方案	1	225	≤10天	8	≤3000	1800	HCG	2	0	0	原发不孕	3.89	≤24	18.3	女方因素	7	7.72	2709	1.95	7	8.67	3.88	76.43	1	11	6.1	B	IVF	4	0	3	2	0	0	0	否	否	全胚冷冻
423	1	2018040247	王新芳	≥35	44	1	拮抗剂方案	2	392.857	≤10天	7	≤3000	2750	HCG	1	3	1	原发不孕	1.94	≤24	20.8	混合因素	7	4.69	1082	1.68	4	6.95	3.88	43	2	7	10.4	A	ICSI	3	0	2	0	2	2	0	否	是	移植	未妊娠
1596	1	2018060051	马爱君	≥35	49	1	刺激方案	1	358.333	≤10天	9	＞3000	3225	HCG	3	2	1	继发不孕	0.48	≤24	22	女方因素	3	0.37	932	0.79	3	6.7	3.88	44.67	4	4	6.9	B-C	IVF	2	0	0	0	0	0	0	是		无可移植胚胎
2026	1	C00018551	孙维谦	＜35	34	1	拮抗剂方案	2	336.111	≤10天	9	＞3000	3025	HCG	3	0	0	原发不孕	3.29	≤24	19	男方因素	1	1	732.18	0.57	4	4.67	3.88	46.81	1	10	8.5	A	ICSI	3	0	2	0	2	2	0	否	是	移植	未妊娠
1428	1	C00017189	梁冬妍	≥35	42	1	拮抗剂方案	2	290.625	≤10天	8	≤3000	2325	HCG	18	1	0	继发不孕	1.83	≤24	21.3	混合因素	3	1.74	965	0.97	7	7.42	3.89	36	2	9	13.7	A-B	ICSI	4	0	2	2	2	2	0	否	是	移植	未妊娠
911	1	C00011908	杨玉奇	＜35	33	3	拮抗剂方案	2	322.5	≤10天	10	＞3000	3225	HCG	5	2	1	继发不孕	1.37	≤24	22	男方因素	4	4.21	961	0.6	5	15.18	3.9	37	1	7	9	A	ICSI	4	0	2	1	2	2	0	否	是	移植	已妊娠	临床妊娠	宫内妊娠	单胚胎停
1091	1	C00006423	叶丽杰	≥35	37	1	降调节方案	3	384.615	＞10天	13	＞3000	5000	HCG	8	0	0	原发不孕	2.54	＞24	24.3	女方因素	4	0.44	1476	0.97	5	5.52	3.9	72	2	11	9.2	A	IVF	3	1	2	0	0	0	0	否	否	全胚冷冻
424	1	2016010047	刘明芝	＜35	28	1	刺激方案	1	357.692	＞10天	13	＞3000	4650	HCG	4	0	0	原发不孕	2.94	＞24	35.5	女方因素	7	0.47	1067	0.58	8	6.47	3.91	50.1	1	10	10.5	B	IVF	4	0	2	1	2	2	0	否	是	移植	未妊娠
740	1	2016110228	刘明芝	＜35	29	3	刺激方案	1	328.571	＞10天	21	＞3000	6900	HCG	4	0	0	原发不孕	1.26	＞24	35.5	男方因素	5	3.54	1445	0.86	6	6.47	3.91	50.1	1	10	8.8	B	ICSI	1	0	0	0	0	0	0	是		无可移植胚胎
943	1	2017080160	王南南	≥35	39	1	拮抗剂方案	2	390	＞10天	15	＞3000	5850	HCG	13	0	0	原发不孕	0.48	≤24	19.8	男方因素	4	9.26	798	2.48	2	9.71	3.92	53.77	4	5	9.6	A	ICSI	2	0	2	0	0	0	0	否	否	全胚冷冻
1625	1	C00004551	王南南	≥35	40	3	降调节方案	3	375	＞10天	11	＞3000	4125	HCG	14	0	0	原发不孕	0.82	≤24	19.8	男方因素	2	7.95	934	0.83	3	9.71	3.92	83.77	4	5	8.7	A	ICSI	3	0	3	2	2	2	0	否	是	移植	未妊娠
1628	1	2018030130	王南南	≥35	40	2	拮抗剂方案	2	560.714	＞10天	14	＞3000	7850	HCG	14	0	0	原发不孕	0.95	≤24	19.8	女方因素	2	6.25	918	1.13	3	9.71	3.92	73.77	4	5	11.6	A	IVF	3	0	1	0	0	0	0	否	否	全胚冷冻
144	1	C00004092	赵淑兰	≥35	39	1	降调节方案	3	300	＞10天	11	＞3000	3300	HCG	1	4	2	继发不孕	2.30	＞24	24.8	女方因素	8	2.12	2208	1.82	9	8.2	3.94	38.2	2	12	10.3	A	IVF	6	1	3	2	1	1	0	否	是	移植	已妊娠	临床妊娠	宫内妊娠	单胎宫内妊娠
798	0	C00017802	张天惠	＜35	26	2	拮抗剂方案	2	251.25	≤10天	10	≤3000	2512.5	HCG	3	0	0	原发不孕	3.03	≤24	23	女方因素	5	2.28	1641	0.86	6	7.55	3.94	22	1	12	1.07	A	IVF	2	2	4	0	0	0	0	否	否	全胚冷冻
826	0	2017090202	吴磊	≥35	35	1	降调节方案	3	150	＞10天	11	≤3000	1650	HCG	3	0	0	原发不孕	2.24	＞24	24.4	女方因素	10	3.06	2204	0.8	9	8.26	3.94	49.09	2	13	13	A	IVF	8	0	7	3	2	2	0	否	是	移植	已妊娠	临床妊娠	宫内妊娠	双胎宫内妊娠
1275	1	C00012424	付琳	＜35	31	1	降调节方案	3	300	＞10天	11	＞3000	3300	HCG	6	0	0	原发不孕	1.93	≤24	22.2	女方因素	3	1.37	856	0.14	3	5.02	3.94	31.38	1	7	11.4	A	IVF	1	0	1	1	1	1	0	否	是	移植	未妊娠
583	0	C00009722	张媛媛	≥35	35	1	拮抗剂方案	2	208.333	≤10天	9	≤3000	1875	HCG	2	0	0	继发不孕	1.51	≤24	23.4	女方因素	6	1.46	1621	0.78	6	7.14	3.95	43	2	9	12.1	A	IVF	4	0	2	0	2	2	0	否	是	移植	未妊娠
613	1	C00018744	尚晓丽	≥35	42	2	刺激方案	1	325	≤10天	10	＞3000	3250	HCG	2	1	0	继发不孕	2.8	＞24	24.5	男方因素	6	1.98	1351.1	0.99	6	5.34	3.95	49.77	2	11	13	B	ICSI	5	1	3	1	0	0	0	否	否	全胚冷冻
766	0	C00011906	邵玲	＜35	33	1	降调节方案	3	218.75	＞10天	12	≤3000	2625	HCG	1	0	0	原发不孕	2.3	≤24	20.6	女方因素	5	3.09	1821	0.39	4	7.14	3.95	43	1	12	1.1	A	IVF	1	0	1	1	1	1	0	否	是	移植	已妊娠	临床妊娠	宫内妊娠	单胎宫内妊娠
1690	1	2018060023	郝海芳	≥35	35	1	降调节方案	3	300	≤10天	9	≤3000	2700	HCG	3	2	1	继发不孕	2.32	≤24	20	女方因素	2	6.09	772	0.91	2	6.92	3.95	56.43	2	9	13	A	IVF	1	0	1	1	1	1	0	否	是	移植	未妊娠
1707	1	C00015482	尚晓丽	≥35	42	1	拮抗剂方案	2	364.286	≤10天	7	≤3000	2550	HCG	2	1	0	继发不孕	1.80	＞24	24.5	女方因素	2	3.7	736.86	0.23	3	5.34	3.95	49.77	2	11	11.8	B	IVF	0	0	0	0	0	0	0	是		无可移植胚胎
2092	1	C00004129	郝海芳	≥35	36	2	刺激方案	1	450	≤10天	6	≤3000	2700	双扳机	3	2	1	继发不孕	2.25	≤24	20	女方因素	1	12.79	486	0.95	1	11.92	3.95	46.43	2	9	0.6	A	IVF	1	0	0	0	0	0	0	是		无可移植胚胎
1018	0	C00011733	汪芳	＜35	32	4	刺激方案	1	285	≤10天	10	≤3000	2850	HCG	2	1	0	继发不孕	1.83	≤24	19	男方因素	4	15.24	1198	2.06	2	8.24	3.97	35.85	1	7	0.52	A-B	ICSI	1	0	0	0	0	0	0	是		无可移植胚胎
1140	1	C00009250	汪芳	＜35	31	2	刺激方案	1	425	＞10天	15	＞3000	6375	HCG	2	1	0	继发不孕	2.47	≤24	19	男方因素	4	3.97	1308	0.82	4	8.24	3.97	35.85	1	7	10	A	ICSI	4	0	4	0	0	0	0	否	否	全胚冷冻
1198	1	C00018857	汪芳	＜35	33	5	拮抗剂方案	2	360	≤10天	10	＞3000	3600	HCG	2	1	0	继发不孕	2.53	≤24	19	男方因素	4	1.67	1061.94	1.33	5	8.24	3.97	35.85	1	7	12	A	ICSI	3	0	1	0	0	0	0	否	否	全胚冷冻
657	1	2017070205	陈天红	＜35	30	1	降调节方案	3	294.231	＞10天	13	＞3000	3825	HCG	5	0	0	原发不孕	3.08	≤24	17.2	混合因素	5	1.94	1559	1.05	6	11.27	3.98	48	1	13	9.2	A	ICSI	5	0	4	2	2	2	0	否	是	移植	未妊娠
785	1	2017030039	林秀梅	≥35	42	1	刺激方案	1	375	≤10天	8	≤3000	3000	HCG	3	1	1	继发不孕	1.76	≤24	23.8	混合因素	5	2	1724	0.68	5	9.2	3.98	40	2	6	8.6	B	ICSI	3	0	3	1	2	2	0	否	是	移植	未妊娠
987	1	C00011591	杜娜娜	≥35	35	1	刺激方案	1	300	≤10天	8	≤3000	2400	HCG	3	0	0	原发不孕	0.57	≤24	22	女方因素	4	8.15	1330	1.42	2	15.2	3.98	40	4	3			IVF	1	0	1	0	0	0	0	否	否	全胚冷冻
1363	1	C00019175	王艳	≥35	36	2	拮抗剂方案	2	400	≤10天	9	＞3000	3600	HCG	3	0	0	原发不孕	1.8	＞24	26	混合因素	3	3.17	534.33	0.4	2	7.15	3.98	39.09	2	7	11.2	A	ICSI	1	0	1	0	1	1	0	否	是	移植	未妊娠
1364	1	C00018381	王艳	≥35	35	1	拮抗剂方案	2	347.727	＞10天	11	＞3000	3825	HCG	3	0	0	原发不孕	0.19	＞24	26	混合因素	3	0.9	534.17	1.08	3	7.15	3.98	59.09	4	7	10.1	B	ICSI	3	0	2	0	2	2	0	否	是	移植	未妊娠
1555	1	2016120216	孙敏	＜35	33	1	刺激方案	1	375	≤10天	8	≤3000	3000	HCG	3	1	0	继发不孕	1.28	≤24	19.4	女方因素	3	2.64	1147	1.04	3	10.2	3.98	40	1	6	11.4	A	IVF	1	0	0	0	0	0	0	是		无可移植胚胎
1832	1	C00005073	李慧	≥35	43	1	刺激方案	1	381.25	＞10天	12	＞3000	4575	双扳机	4	3	3	继发不孕	0.58	≤24	20.8	女方因素	2	3.75	486	0.74	1	15.2	3.98	40	4	5	8.9	A	IVF	0	0	0	0	0	0	0	是		无可移植胚胎
2014	1	C00013478	杜娜娜	≥35	35	3	刺激方案	1	300	≤10天	8	≤3000	2400	HCG	3	0	0	原发不孕	0.65	≤24	22	女方因素	1	17.79	840	0.72	1	15.2	3.98	40	4	3	0.94	B	IVF	1	0	1	0	0	0	0	否	否	全胚冷冻
2271	1	C00012858	杜娜娜	≥35	35	2	刺激方案	1	375	≤10天	10	＞3000	3750	HCG	3	0	0	原发不孕	0.96	≤24	22	女方因素	1	5.47	313	1.78	1	15.2	3.98	40	4	3			IVF	0	0	1	0	0	0	0	否	否	全胚冷冻
572	1	C00010466	李亚丽	≥35	46	1	刺激方案	1	300	≤10天	8	≤3000	2400	HCG	7	4	2	继发不孕	0.74	≤24	22	女方因素	6	7.6	1724	1.24	6	8.11	3.99	42	4	11	0.5	A	IVF	5	0	2	0	0	0	0	否	否	全胚冷冻
1520	0	2017040056	李世珍	＜35	31	2	降调节方案	3	265.385	＞10天	13	＞3000	3450	HCG	2	1	1	继发不孕	3.16	≤24	23.8	男方因素	3	1.56	836.18	0.47	7	8.11	3.99	42	1	17	16.3	A	ICSI	5	0	4	0	0	0	0	否	否	全胚冷冻
103	0	C00015058	彭春燕	＜35	32	1	拮抗剂方案	2	218.75	＞10天	12	≤3000	2625	双扳机	1	1	1	继发不孕	3.1	＞24	30.9	女方因素	9	1.04	1879	0.69	8	4.77	4	56	1	38	9.5	B	IVF	7	0	2	0	2	2	0	否	是	移植	未妊娠
652	1	C00012317	杜蕾蕾	＜35	29	2	降调节方案	3	412.5	≤10天	10	＞3000	4125	HCG	6	0	0	原发不孕	2.54	≤24	16.8	混合因素	5	1.32	753	1.06	4	10.95	4	48	1	7	1.24	A	ICSI	1	0	1	1	1	1	0	否	是	移植	未妊娠
1288	0	C00010869	杜蕾蕾	＜35	28	1	拮抗剂方案	2	237.5	≤10天	8	≤3000	1900	HCG	6	0	0	原发不孕	1.13	≤24	16.8	女方因素	3	4.33	813	1.49	3	10.95	4	48	3	7	11.1	A	IVF	1	1	1	0	1	0	1	否	是	移植	未妊娠
62	0	2018070145	焦贵玲	≥35	36	1	降调节方案	3	286.364	＞10天	11	＞3000	3150	HCG	4	2	1	继发不孕	2.77	＞24	24.2	女方因素	9	1.96	2661	1.18	8	10.72	4.01	41.75	2	14	11.5	A	IVF	4	1	3	0	2	2	0	否	是	移植	已妊娠	临床妊娠	宫内妊娠	单胎宫内妊娠
185	0	2017050020	郝玉华	＜35	32	3	降调节方案	3	238.636	＞10天	11	≤3000	2625	HCG	2	0	0	原发不孕	2.29	＞24	24.7	男方因素	8	1.39	2232	0.54	9	6.94	4.01	29	1	24	12.8	A	ICSI	8	0	2	0	0	0	0	否	否	全胚冷冻
493	0	C00005237	许桂莹	＜35	33	2	降调节方案	3	247.5	≤10天	10	≤3000	2475	HCG	1	0	0	原发不孕	2.95	＞24	27.7	女方因素	6	1.27	2536	1.07	8	5.68	4.01	60	1	20	12.1	A	IVF	6	0	3	0	2	2	0	否	是	移植	已妊娠	临床妊娠	宫内妊娠	双胎宫内妊娠
853	1	2017120018	王婷婷	＜35	32	1	刺激方案	1	300	＞10天	12	＞3000	3600	HCG	1	3	0	继发不孕	1.72	≤24	22.9	女方因素	5	2.69	1294	0.47	2	7.16	4.01	65.69	1	8	10	A-B	IVF	1	0	1	0	0	0	0	否	否	全胚冷冻
1093	1	2018030291	吕彦娜	≥35	37	2	刺激方案	1	375	＞10天	11	＞3000	4125	HCG	2	5	3	继发不孕	2.24	＞24	25.7	女方因素	4	4.9	1471	0.63	3	11.26	4.01	93	2	6	4.5	A	IVF	2	0	2	0	0	0	0	否	否	全胚冷冻
1579	1	C00003429	吕彦娜	≥35	38	4	刺激方案	1	375	≤10天	10	＞3000	3750	HCG	2	5	3	继发不孕	0.41	＞24	25.7	女方因素	3	7.89	1051	1.13	2	11.26	4.01	53	4	6	5.2	A-B	IVF	2	0	2	1	0	0	0	否	否	全胚冷冻
1802	1	C00003694	王婷婷	＜35	33	2	降调节方案	3	300	≤10天	9	≤3000	2700	HCG	1	3	0	继发不孕	2.73	≤24	22.9	女方因素	2	1.17	536	0.69	4	7.16	4.01	65.69	1	8	7.4	A	IVF	1	0	1	0	1	1	0	否	是	移植	未妊娠
2048	1	C00004094	郭冬梅	≥35	46	1	降调节方案	3	450	≤10天	7	＞3000	3150	HCG	6	5	2	继发不孕	0.67	＞24	26	混合因素	1	11.18	655	1.35		13.58	4.01	62	4	3	7.3	B		0	0	0	0	0	0	0	是		未取卵
2188	1	2018050222	吕彦娜	≥35	37	3	刺激方案	1	312.5	≤10天	6	≤3000	1875	HCG	2	5	3	继发不孕	0.43	＞24	25.7	女方因素	1	2.3	287	0.42	1	11.26	4.01	43	4	6	8	B	IVF	0	0	0	0	0	0	0	是		无可移植胚胎
2259	0	C00003717	陈芳芳	≥35	35	6	刺激方案	1	281.25	≤10天	4	≤3000	1125	HCG	7	0	0	原发不孕	0.24	≤24	22.3	女方因素	1	15.66	337.39	1.06	0	19.73	4.01	36.7	4	1				0	0	0	0	0	0	0	是		未取到卵
246	0	C00017666	弭守莺	＜35	34	1	拮抗剂方案	2	225	＞10天	11	≤3000	2475	HCG	4	0	0	原发不孕	2.86	＞24	27.6	女方因素	7	4.74	1914	0.54	4	5.89	4.02	57	1	12	13.9	A-B	IVF	1	0	1	0	1	1	0	否	是	移植	未妊娠
398	0	2018030047	栾明慧	＜35	30	1	降调节方案	3	200	＞10天	12	≤3000	2400	HCG	6	0	0	原发不孕	2.21	≤24	20.3	不明原因	7	0.56	1366	0.7	8	5.7	4.03	29	1	20	10.6	A	IVF	4	0	2	0	2	2	0	否	是	移植	已妊娠	临床妊娠	宫内妊娠	单胎宫内妊娠
492	1	C00006406	刘文华	≥35	41	3	刺激方案	1	368.182	＞10天	11	＞3000	4050	HCG	12	0	0	原发不孕	1.41	＞24	24.2	女方因素	6	7.84	2552	1.39	6	4.87	4.03	76.43	2	9	0.9	A-B	IVF	5	0	2	0	0	0	0	否	否	全胚冷冻
607	0	2017110182	刘文华	≥35	39	1	降调节方案	3	225	≤10天	9	≤3000	2025	HCG	12	0	0	原发不孕	3.89	＞24	24.2	女方因素	6	1.8	1458	1.47	7	4.87	4.03	46.43	2	17	11.6	A	IVF	4	0	2	0	2	2	0	否	是	移植	未妊娠
1556	0	2016030347	李倩	≥35	41	1	降调节方案	3	285	≤10天	10	≤3000	2850	HCG	3	0	0	继发不孕	0.603	≤24	23.7	不明原因	3	2.26	1142	0.09	2	12	4.03	95.42	4	4	10.5	B	IVF	2	0	2	1	2	2	0	否	是	移植	未妊娠
1728	1	2016100207	李倩	≥35	42	3	刺激方案	1	450	≤10天	9	＞3000	4050	HCG	3	2	1	继发不孕	0.85	≤24	23.7	女方因素	2	7.62	686	1.17	2	12	4.03	52	4	4	8.3	A-B	IVF	1	0	0	0	0	0	0	是		无可移植胚胎
1775	1	2016070012	李倩	≥35	42	2	刺激方案	1	307.5	≤10天	10	＞3000	3075	HCG	3	2	1	继发不孕	0.52	≤24	23.7	女方因素	2	1.42	593	0.68	2	12	4.03	44	4	5	9.7	B	IVF	2	0	1	0	0	0	0	否	否	全胚冷冻
1981	1	2018060095	陈文君	≥35	49	1	刺激方案	1	294.231	＞10天	13	＞3000	3825	HCG	6	2	2	继发不孕	0.78	＞24	27.1	女方因素	2	16.46	417	0.7	4	8.9	4.03	43.67	4	6	0.71	A	IVF	1	0	0	0	0	0	0	是		无可移植胚胎
2224	0	2016110265	李倩	≥35	42	4	刺激方案	1	150	≤10天	7	≤3000	1050	HCG	3	2	1	继发不孕	0.316	≤24	23.7	女方因素	1	2.46	186	0.62	1	12	4.03	35.42	4	2	8.3	B	IVF	1	0	1	0	0	0	0	否	否	全胚冷冻
388	0	2017020098	窦方花	＜35	32	1	降调节方案	3	250	＞10天	12	≤3000	3000	HCG	9	1	0	继发不孕	2.49	＞24	26	女方因素	8	3.23	2621	2.09	8	7.4	4.04	46.43	1	11	13		IVF	7	0	6	4	0	0	0	否	否	全胚冷冻
644	0	2017100159	李洁	＜35	30	1	降调节方案	3	184.091	＞10天	11	≤3000	2025	HCG	3	0	0	原发不孕	3.81	≤24	21.5	女方因素	5	1.03	894	0.47	6	6.37	4.04	30	1	16	14.5	A	IVF	2	0	2	0	2	2	0	否	是	移植	未妊娠
1184	0	2016120182	路云	≥35	45	2	刺激方案	1	225	≤10天	9	≤3000	2025	HCG	1	3	1	继发不孕	0.86	＞24	24.3	女方因素	4	3.26	1122	0.51	5	9.13	4.04	59	4	6	5	B	IVF	2	0	0	0	0	0	0	是		无可移植胚胎
1474	1	2016100122	路云	≥35	45	1	刺激方案	1	330	≤10天	5	≤3000	1650	HCG	1	3	1	继发不孕	1.13	＞24	24.3	女方因素	3	1.49	887	0.82	4	9.13	4.04	59	4	6	9.5	A	IVF	2	0	2	1	2	2	0	否	是	移植	未妊娠
1947	1	C00003763	吴素敏	≥35	38	1	刺激方案	1	356.25	≤10天	8	≤3000	2850	HCG	5	2	1	继发不孕	1.45	≤24	19.1	不明原因	2	11.38	511	0.97	3	13.38	4.04	69.8	2	7	9	A	IVF	1	0	0	0	0	0	0	是		无可移植胚胎
2236	0	C00003801	李花平	≥35	42	1	降调节方案	3	278.571	≤10天	7	≤3000	1950	HCG	4	1	1	继发不孕	0.7	≤24	21.4	女方因素	1	16	314	1.14	2	12.56	4.04	88	4	5	0.61	B	IVF	0	0	0	0	0	0	0	是		无可移植胚胎
244	0	C00013283	许红	＜35	31	1	拮抗剂方案	2	202.5	≤10天	10	≤3000	2025	HCG	3	0	0	原发不孕	2.55	＞24	25.3	女方因素	7	2.2	1971	0.55	5	8.21	4.05	32	1	14	13.8	A	IVF	4	0	3	0	0	0	0	否	否	全胚冷冻
719	0	C00012329	戚聿婷	＜35	34	1	降调节方案	3	225	＞10天	12	≤3000	2700	HCG	2	3	0	继发不孕	1.46	≤24	23.5	女方因素	5	3.03	1151	0.59	6	8.87	4.05	19	1	12	11.4	B	IVF	6	0	6	0	0	0	0	否	否	全胚冷冻
593	1	C00017249	杨小玲	≥35	39	2	刺激方案	1	300	＞10天	16	＞3000	4800	HCG	8	1	0	继发不孕	1.98	＞24	25.2	男方因素	6	0.04	1553	0.25	5	9.24	4.06	11	2	10	11.6	A	ICSI	5	0	2	0	2	2	0	否	是	移植	已妊娠	临床妊娠	宫内妊娠	单胎宫内妊娠
966	1	C00016440	张海燕	≥35	40	2	刺激方案	1	300	≤10天	7	≤3000	2100	HCG	3	1	0	继发不孕	1.81	≤24	21.1	女方因素	4	7.96	1392	1.14	4	6.66	4.06	57	2	10	0.9	A	IVF	3	0	2	0	0	0	0	否	否	全胚冷冻
1337	1	2016070225	刘志莲	≥35	42	8	刺激方案	1	300	≤10天	8	≤3000	2400	HCG	16	0	0	原发不孕	1.5	＞24	25.5	女方因素	3	2	638	1.21	1	9.65	4.06	56	2	9	9	A	IVF	1	0	1	1	1	1	0	否	是	移植	未妊娠
2104	0	C00015157	张静	≥35	36	1	拮抗剂方案	2	225	≤10天	9	≤3000	2025	双扳机	3	3	0	继发不孕	1.12	＞24	29.1	女方因素	1	6.98	460	0.53	1	10.96	4.06	95.42	4	5	10.2	B		0	0	0	0	0	0	0	是		未行授精
1057	0	C00007916	李丹妮	＜35	28	1	刺激方案	1	225	≤10天	8	≤3000	1800	HCG	4	0	0	原发不孕	2.75	≤24	20.1	混合因素	4	6.44	1681	0.92	5	19.49	4.07	33	1	7	6.4	A-B	ICSI	5	0	3	2	0	0	0	否	否	全胚冷冻
1489	0	2016030332	于江华	≥35	41	1	刺激方案	1	150	≤10天	7	≤3000	1050	HCG	2	1	1	继发不孕	1.67	≤24	22.4	男方因素	3	1.42	812	0.41	6	8.85	4.07	39.66	2	9	13.2	A-B	IVF	5	0	4	0	0	0	0	否	否	全胚冷冻
1867	1	C00017015	刘菲菲	≥35	36	1	刺激方案	1	340.385	＞10天	13	＞3000	4425	HCG	3	0	0	原发不孕	0.3	≤24	23.4	女方因素	2	32.99	362	1.73	0	6.23	4.07	76.86	4	5	6.3	B		0	0	0	0	0	0	0	是		未取到卵
175	1	C00006402	王俊	＜35	30	1	降调节方案	3	361.765	＞10天	17	＞3000	6150	HCG	4	0	0	原发不孕	1.56	＞24	28.7	混合因素	8	1.16	2385	1.26	7	5.4	4.08	30	1	22	0.92	A	ICSI	3	0	2	0	2	2	0	否	是	移植	已妊娠	临床妊娠	宫内妊娠	单胎宫内妊娠
922	1	C00013404	于欣	≥35	42	2	拮抗剂方案	2	333.333	≤10天	9	≤3000	3000	HCG	5	4	1	继发不孕	1.28	＞24	24.2	女方因素	4	3.82	892	0.18	4	10.53	4.08	58	2	8	9.6	B	IVF	2	1	3	2	2	2	0	否	是	移植	未妊娠
1545	1	C00010066	于欣	≥35	41	1	降调节方案	3	400	≤10天	9	＞3000	3600	HCG	4	4	1	继发不孕	1.44	＞24	24.2	女方因素	3	5.3	1170	0.53	5	10.53	4.08	58	2	8	0.84	A-B	IVF	2	1	2	1	0	0	0	否	否	全胚冷冻
1838	0	C00005298	田相云	≥35	45	3	刺激方案	1	250	≤10天	9	≤3000	2250	HCG	3	1	1	继发不孕	0.86	≤24	24	女方因素	2	7.46	469	0.78	3	7.34	4.08	51	4	5	0.76	B	IVF	1	0	1	1	0	0	0	否	否	全胚冷冻
447	1	C00014083	张文文	≥35	36	1	降调节方案	3	312.5	＞10天	12	＞3000	3750	HCG	7	2	1	继发不孕	3.87	≤24	19.8	女方因素	6	0.63	1814	1.35	7	6.15	4.09	52	2	15	17.5	A	IVF	6	0	4	1	0	0	0	否	否	全胚冷冻
1156	0	2016100214	刘文静	＜35	31	2	拮抗剂方案	2	283.333	≤10天	9	≤3000	2550	HCG	3	0	0	原发不孕	1.13	≤24	20	男方因素	4	1.15	1239	0.76	4	6.3	4.09	45.2	3	6	8.3	B	ICSI	6	0	4	0	2	2	0	否	是	移植	未妊娠
1358	0	C00015531	赵亚萍	＜35	30	1	降调节方案	3	253.846	＞10天	13	＞3000	3300	HCG	1	3	0	继发不孕	1.42	≤24	22	女方因素	3	0.34	551	2.43	2	7.38	4.09	22	1	8	1.07	A	IVF	1	1	1	0	0	0	0	否	否	全胚冷冻
2260	0	2017080143	刘文静	＜35	32	1	拮抗剂方案	2	214.286	＞10天	14	≤3000	3000	双扳机	3	0	0	原发不孕	1.82	≤24	24	女方因素	1	16.96	331	0.64	0	6.3	4.09	45.2	1	6				0	0	0	0	0	0	0	是		未取到卵
157	0	C00009340	张艳华	＜35	31	2	降调节方案	3	210	＞10天	15	＞3000	3150	HCG	3	1	1	继发不孕	2.6	≤24	23.8	混合因素	8	0.91	1832	1.38	8	8.2	4.1	50	1	11	15.4	A-B	ICSI	5	0	4	2	0	0	0	否	否	全胚冷冻
540	1	2017060108	程宪菊	≥35	42	1	刺激方案	1	333.333	≤10天	9	≤3000	3000	HCG	2	1	1	继发不孕	1.7	≤24	21.9	女方因素	6	7.81	2038	1.9	5	7.5	4.1	23.18	2	9	8.1	A	IVF	3	0	1	1	0	0	0	否	否	全胚冷冻
793	0	C00018989	徐秀云	＜35	26	1	刺激方案	1	243.75	≤10天	8	≤3000	1950	HCG	6	0	0	原发不孕	1.23	＞24	24.4	女方因素	5	2.39	1668.44	1.29	5	8.22	4.1	46.67	1	6	10.6	C	IVF	3	1	3	2	0	0	0	否	否	全胚冷冻
893	1	C00016410	信近翠	＜35	33	1	拮抗剂方案	2	390.625	≤10天	8	＞3000	3125	HCG	2	3	1	继发不孕	2.3	≤24	22.3	女方因素	5	3.79	1060	1.64	3	8.14	4.1	30.1	1	8	11.3	B	IVF	3	0	1	0	1	1	0	否	是	移植	未妊娠
913	1	C00009949	陈琳	≥35	35	3	拮抗剂方案	2	291.667	≤10天	9	≤3000	2625	HCG	3	4	1	继发不孕	1.46	＞24	26	女方因素	4	1.63	958	0.27	3	11.51	4.1	22	2	12	7.5	A-B	IVF	2	0	0	0	0	0	0	是		无可移植胚胎
1075	1	C00007056	陈琳	≥35	35	2	降调节方案	3	294.643	＞10天	14	＞3000	4125	HCG	4	4	1	继发不孕	1.76	＞24	26	女方因素	4	2.88	1565	0.48	4	11.51	4.1	22	2	12	10.6	B	IVF	2	0	1	0	1	1	0	否	是	移植	未妊娠
2147	0	2018050045	吴迷勇	≥35	41	1	降调节方案	3	248.077	＞10天	13	＞3000	3225	双扳机	3	1	1	继发不孕	0.88	＞24	25.4	女方因素	1	13.58	376	0.88	1	8.86	4.1	34.78	4	6	12.9	B	IVF	0	0	0	0	0	0	0	是		未受精
71	1	C00016660	刘中红	≥35	37	1	刺激方案	1	300	≤10天	9	≤3000	2700	HCG	1	3	0	继发不孕	1.4	＞24	25.3	女方因素	7	7.59	1929	1.34	6	13.57	4.11	64	2	12	0.92	A-B	IVF	5	3	5	0	0	0	0	否	否	全胚冷冻
1041	1	C00006584	闫宁宁	＜35	28	1	刺激方案	1	435.938	＞10天	16	＞3000	6975	双扳机	5	1	0	继发不孕	2.71	≤24	21.3	混合因素	4	3.07	1785	1.46	3	10.84	4.11	51	1	7	0.95	B	ICSI	2	0	2	0	0	0	0	否	否	全胚冷冻
1513	0	C00011109	李香纷	＜35	29	1	刺激方案	1	225	≤10天	7	≤3000	1575	HCG	2	0	0	原发不孕	2.64	≤24	20.3	女方因素	3	3.99	877	0.5	5	13.72	4.11	46	1	11	9.2	A	IVF	2	0	2	0	2	2	0	否	是	移植	已妊娠	临床妊娠	宫内妊娠	双胎宫内妊娠
1865	0	2016020020	娄本岭	＜35	29	1	刺激方案	1	150	≤10天	4	≤3000	600	HCG	1	2	1	继发不孕	1.1	＞24	27.3	女方因素	2	6.38	365	1.21	2	9.69	4.11	91	3	3	11.4	A-B	IVF	2	0	0	0	0	0	0	是		无可移植胚胎
6	0	2017020209	刘宁宁	≥35	35	1	降调节方案	3	257.692	＞10天	13	＞3000	3350	HCG	2	3	1	继发不孕	2.17	≤24	23.4	女方因素	10	0.89	2237	1.48	9	7.14	4.12	31	2	10	11.7	A	IVF	7	0	2	0	2	2	0	否	是	移植	未妊娠
179	1	C00016253	于明月	≥35	37	1	降调节方案	3	300	≤10天	9	≤3000	2700	HCG	1	1	1	继发不孕	3.76	＞24	27.3	女方因素	8	1.32	2311	0.58	8	5.17	4.12	40.63	2	14	12.3	B	IVF	5	0	2	0	2	2	0	否	是	移植	未妊娠
397	1	2016030196	李玉连	≥35	39	1	刺激方案	1	312.5	＞10天	12	＞3000	3750	HCG	7	1	0	继发不孕	1.67	≤24	21.4	女方因素	7	2.07	1367	1.52	8	6.98	4.12	55.42	2	12	11	A	IVF	7	0	2	0	2	2	0	否	是	移植	已妊娠	临床妊娠	宫内妊娠	双胎宫内妊娠
847	1	2016080036	王晓乐	＜35	31	1	降调节方案	3	312.5	≤10天	10	＞3000	3125	HCG	3	0	0	原发不孕	2.29	≤24	22.3	女方因素	5	3.05	1343	1.46	3	5.17	4.12	40.63	1	13	14.3	A-B	IVF	1	0	2	0	2	2	0	否	是	移植	未妊娠
1039	1	C00005745	杨春荣	≥35	42	1	刺激方案	1	352.5	≤10天	10	＞3000	3525	HCG	3	1	1	继发不孕	0.59	≤24	23	混合因素	4	7.62	1112	0.79	3	8.44	4.12	36	4	7	1.08	A	ICSI	2	0	1	1	0	0	0	否	否	全胚冷冻
1470	0	C00018792	张智霞	≥35	42	1	拮抗剂方案	2	258.333	≤10天	9	≤3000	2325	HCG	1	4	1	继发不孕	1.18	≤24	21.6	女方因素	3	8.53	934	1.26	4	11.13	4.12	46.72	4	7	8.7	A	IVF	2	0	1	1	0	0	0	否	否	全胚冷冻
1747	1	2016060161	张艳	≥35	40	1	降调节方案	3	400	＞10天	15	＞3000	6000	HCG	1	0	0	原发不孕	0.31	＞24	27.5	女方因素	2	0.57	633	0.52	3	12.17	4.12	70.63	4	5	14	A	IVF	2	0	2	1	2	2	0	否	是	移植	已妊娠	临床妊娠	宫内妊娠	单胎宫内妊娠
267	0	C00018491	朱红梅	≥35	35	1	拮抗剂方案	2	225	＞10天	11	≤3000	2475	HCG	3	3	2	继发不孕	2.81	≤24	20.8	女方因素	7	5.39	2399	1.67	4	5.89	4.13	51.87	2	16	8.6	A	IVF	1	0	0	0	0	0	0	是		无可移植胚胎
25	0	2018060112	孙美华	＜35	34	1	降调节方案	3	225	≤10天	8	≤3000	1800	HCG	7	1	0	原发不孕	2.5	≤24	23.3	不明原因	10	0.88	1839	3.6	7	6.27	4.14	34.76	1	11	9.9	B	IVF	4	0	4	3	2	2	0	否	是	移植	已妊娠	临床妊娠	宫内妊娠	单胚胎停
130	1	C00016636	徐利立	＜35	31	1	降调节方案	3	480	＞10天	15	＞3000	7200	HCG	5	2	1	继发不孕	2.11	＞24	35.8	女方因素	8	0.19	1832	0.78	6	6.87	4.14	24.86	1	14	10.8	A-B	IVF	3	0	0	0	0	0	0	是		无可移植胚胎
165	1	C00004102	巩加喜	≥35	49	2	拮抗剂方案	2	450	≤10天	8	＞3000	3600	双扳机	4	2	1	继发不孕	1.13	≤24	22	男方因素	8	2.45	2665	1.06	5	7.3	4.14	28	4	11	10.9	A	ICSI	3	0	2	0	0	0	0	否	否	全胚冷冻
290	1	C00009492	王倩倩	＜35	32	1	刺激方案	1	450	≤10天	9	＞3000	4050	HCG	4	0	0	原发不孕	2.79	＞24	24.4	女方因素	7	5.53	1831	1.51	4	5.53	4.14	49	1	12	0.87		IVF	1	0	4	0	0	0	0	否	否	全胚冷冻
1221	1	C00004990	巩加喜	≥35	49	3	降调节方案	3	400	≤10天	6	≤3000	2400	HCG	4	2	1	继发不孕	0.34	≤24	22	女方因素	3	5.44	995	1.09	3	7.3	4.14	28	4	11	11.7	A	IVF	1	0	1	1	1	1	0	否	是	移植	未妊娠
912	0	C00016206	蔺爱	≥35	35	3	拮抗剂方案	2	185.714	≤10天	7	≤3000	1300	HCG	3	3	1	继发不孕	2.1	≤24	18	男方因素	4	4.95	961	0.88	4	7.3	4.15	39.09	2	9	12.4	A-B	ICSI	3	0	3	3	0	0	0	否	否	全胚冷冻
1494	1	2016030230	刘国红	≥35	40	1	刺激方案	1	318.182	＞10天	11	＞3000	3500	HCG	2	2	0	继发不孕	0.19	≤24	21.6	女方因素	3	18	968	1.97	2	11.26	4.15	45	4	4	4.3	B	IVF	1	0	1	0	0	0	0	否	否	全胚冷冻
1529	1	2016060095	刘国红	≥35	40	2	刺激方案	1	421.875	≤10天	8	＞3000	3375	HCG	2	2	0	继发不孕	0.84	≤24	21.6	混合因素	3	13.02	1237	1.21	3	11.26	4.15	45	4	4	5.5	A	ICSI	1	0	1	1	0	0	0	否	否	全胚冷冻
1543	1	C00018484	穆举芹	≥35	45	1	拮抗剂方案	2	340.909	＞10天	11	＞3000	3750	HCG	4	1	1	继发不孕	0.98	≤24	22.1	男方因素	3	1.84	1170	1.11	3	9.92	4.15	39.7	4	6	9.3	A	ICSI	2	0	2	1	2	2	0	否	是	移植	未妊娠
1558	1	C00012492	蔺爱	＜35	34	1	拮抗剂方案	2	291.667	≤10天	9	≤3000	2625	HCG	3	3	1	继发不孕	1.48	≤24	18	女方因素	3	5.18	1137	0.73	4	7.3	4.15	49.09	1	9	1.12	A	IVF	3	0	2	1	1	1	0	否	是	移植	未妊娠
1855	0	C00009465	李永菊	≥35	47	1	刺激方案	1	150	≤10天	4	≤3000	600	HCG	3	5	1	继发不孕	0.20	＞24	24.5	混合因素	2	30.93	412	0.81		11.26	4.15	67.78	4	3	14.9	A		0	0	0	0	0	0	0	是		未取卵
1923	0	C00015841	蔺爱	≥35	35	2	刺激方案	1	225	≤10天	8	≤3000	1800	HCG	3	3	1	继发不孕	1.26	≤24	18	女方因素	2	6.29	470	1.06	0	7.3	4.15	49.09	2	7	9.3	A-B		0	0	0	0	0	0	0	是		未取到卵
64	0	C00018512	司薇薇	＜35	29	2	降调节方案	3	275	＞10天	11	＞3000	3025	HCG	4	0	0	原发不孕	1.41	＞24	27.3	女方因素	9	1.91	2632.32	1.43	9	4.82	4.16	46	1	13	8.9	A	IVF	8	0	4	2	0	0	0	否	否	全胚冷冻
1926	1	2016010024	田林林	＜35	31	3	刺激方案	1	375	＞10天	12	＞3000	4500	HCG	5	0	0	原发不孕	1.51	≤24	22.8	男方因素	5	1.83	1064	0.94	6	8.34	4.16	30	1	8	9.6	B	ICSI	3	0	2	2	2	2	0	否	是	移植	未妊娠
255	1	C00008187	刘秋娟	≥35	35	1	降调节方案	3	305.357	＞10天	14	＞3000	4275	HCG	3	2	1	继发不孕	2.59	≤24	23.2	女方因素	7	1.38	1719	0.9	9	11.73	4.17	41	2	13	1.3	A-B	IVF	9	0	4	2	2	2	0	否	是	移植	未妊娠
1106	1	2017040171	刘淑云	≥35	41	1	降调节方案	3	325	≤10天	8	≤3000	2600	HCG	3	2	1	继发不孕	0.928	＞24	25	女方因素	4	8.1	1418	0.76	3	11.48	4.17	95	4	5	15.8	B	IVF	1	0	1	0	1	1	0	否	是	移植	未妊娠
1227	1	C00011456	张克彩	≥35	38	1	拮抗剂方案	2	300	≤10天	9	≤3000	2700	HCG	1	2	1	继发不孕	2.680	＞24	28.8	女方因素	3	14.43	973	0.9	2	6.73	4.17	41	2	9	1.53	A-B	IVF	1	0	0	0	0	0	0	是		无可移植胚胎
2002	1	2016030326	孙在芳	≥35	43	1	刺激方案	1	347.727	＞10天	11	＞3000	3825	HCG	2	4	1	继发不孕	0.93	≤24	23.2	女方因素	1	4.61	965	0.49	3	14.45	4.17	78.54	4	6	8	A	IVF	3	0	2	0	0	0	0	否	否	全胚冷冻
2023	0	2016120234	孙燕	≥35	42	1	刺激方案	1	193.75	＞10天	12	≤3000	2325	HCG	1	4	1	继发不孕	0.2	＞24	25.6	女方因素	1	2.79	743	0.87	2	13.75	4.17	65	4	3	8	B	IVF	1	0	1	1	0	0	0	否	否	全胚冷冻
2135	0	2017040168	孙燕	≥35	43	2	刺激方案	1	150	≤10天	9	≤3000	1350	HCG	1	4	1	继发不孕	0.93	＞24	25.6	女方因素	1	15.27	396	0.67	1	13.75	4.17	65	4	3	6.5	A-B	IVF	0	0	0	0	0	0	0	是		无可移植胚胎
186	0	2016040104	王萍	＜35	28	1	降调节方案	3	150	＞10天	13	≤3000	1950	HCG	5	0	0	原发不孕	4.49	＞24	29.3	女方因素	8	2.63	2220	1.01	7	6.15	4.18	26	1	62	9.2	A	IVF	4	0	4	2	2	2	0	否	是	移植	已妊娠	临床妊娠	宫内妊娠	单胚胎停
303	0	2016010100	付帅	＜35	27	3	降调节方案	3	166.667	＞10天	15	≤3000	2500	HCG	5	0	0	原发不孕	1.90	≤24	21.4	不明原因	7	2.03	2493	1.17	9	5.89	4.18	93	1	24	8.6	A	IVF	9	0	2	0	0	0	0	否	否	全胚冷冻
1443	1	2016100067	殷庆瑞	≥35	39	2	降调节方案	3	450	≤10天	9	＞3000	4050	HCG	14	0	0	原发不孕	1.49	≤24	21.6	混合因素	3	7.65	913	0.79	3	7.21	4.18	69.73	2	8	13.1	B	ICSI	4	0	2	1	2	2	0	否	是	移植	已妊娠	临床妊娠	宫内妊娠	双胎胎停
271	0	2018030283	陈琳	＜35	33	2	降调节方案	3	287.5	＞10天	12	＞3000	3450	HCG	5	0	0	原发不孕	2.85	≤24	19.7	不明原因	7	0.91	2253	1.31	8	7.8	4.2	32.34	1	12	12.5	A-B	ICSI	4	0	2	1	0	0	0	否	否	全胚冷冻
381	0	C00016942	刘文欣	≥35	40	1	拮抗剂方案	2	200	≤10天	10	≤3000	2000	HCG	7	1	0	继发不孕	1.53	≤24	18.5	女方因素	8	3.22	2650	1.18	9	8.5	4.2	35.4	2	13	10	A	IVF	6	0	6	3	2	2	0	否	是	移植	未妊娠
483	0	2016020011	刘双	≥35	37	1	降调节方案	3	207.692	＞10天	13	≤3000	2700	HCG	1	1	1	原发不孕	1.44	≤24	21.2	女方因素	6	1.22	1684	1.31	4	6.69	4.2	31	2	10	10.7	A	IVF	4	0	2	0	2	2	0	否	是	移植	未妊娠
742	1	2016090220	刘双	≥35	38	2	刺激方案	1	402.273	＞10天	11	＞3000	4425	HCG	1	1	1	原发不孕	2.37	≤24	21.2	女方因素	5	1.95	1437	1.53	9	6.69	4.2	46.43	2	10	11	B	IVF	6	0	4	3	0	0	0	否	否	全胚冷冻
815	1	2018030238	王爱华	≥35	40	1	刺激方案	1	300	≤10天	10	≤3000	3000	HCG	3	0	0	原发不孕	1.68	≤24	22.3	女方因素	5	10.06	1538	0.45	4	8.24	4.2	51.38	2	8	4.7	A	IVF	1	0	1	0	0	0	0	否	否	全胚冷冻
1015	1	C00016139	汪晓宁	＜35	33	1	刺激方案	1	300	≤10天	9	≤3000	2700	HCG	3	1	1	继发不孕	1.09	≤24	20.6	女方因素	4	18.5	1206	0.87	3	7.1	4.2	83	3	6	0.59	A	IVF	2	0	2	1	0	0	0	否	否	全胚冷冻
1141	1	C00017922	周丽琴	≥35	38	1	拮抗剂方案	2	300	≤10天	8	≤3000	2400	HCG	1	7	1	继发不孕	1.702	≤24	23.1	女方因素	4	10.61	1307.54	0.96	3	12.3	4.2	26	2	7	11.5	A	IVF	2	0	2	0	2	2	0	否	是	移植	已妊娠	临床妊娠	宫内妊娠	单胎宫内妊娠
1151	1	2018060093	孙敏	＜35	34	4	刺激方案	1	450	≤10天	8	＞3000	3600	HCG	3	1	0	继发不孕	1.13	≤24	19.4	不明原因	4	9	1269	0.62	3	8.6	4.2	51	3	6	5.4	B	ICSI	3	0	1	0	0	0	0	否	否	全胚冷冻
1167	0	C00013006	张莎莎	＜35	32	1	拮抗剂方案	2	203.571	≤10天	7	≤3000	1425	HCG	2	1	1	继发不孕	1.13	＞24	25	女方因素	4	6.56	1195	0.83	2	7.99	4.2	83	3	8	9.7	A	IVF	1	0	1	0	1	1	0	否	是	移植	未妊娠
1329	1	2017110105	孙敏	＜35	34	3	刺激方案	1	292.5	≤10天	10	≤3000	2925	HCG	3	1	0	继发不孕	1.62	≤24	19.4	女方因素	3	13.51	663	1.05	3	8.6	4.2	31	1	6	5.6	B	IVF	3	0	2	1	0	0	0	否	否	全胚冷冻
1571	1	2018040085	周素丽	≥35	42	2	拮抗剂方案	2	300	≤10天	5	≤3000	1500	HCG	3	4	1	继发不孕	0.25	≤24	20	男方因素	3	2.61	1080	0.7	2	8.17	4.2	102	4	4	8.2	A	ICSI	1	0	0	0	0	0	0	是		无可移植胚胎
1934	1	2017100158	周素丽	≥35	42	1	刺激方案	1	300	≤10天	10	≤3000	3000	HCG	3	4	1	继发不孕	0.63	≤24	20	女方因素	2	5.85	435	0.35	1	8.17	4.2	102	4	4	10.7	A	IVF	0	0	0	0	0	0	0	是		未受精
119	0	C00018724	李晓	＜35	25	1	降调节方案	3	253.125	≤10天	8	≤3000	2025	HCG	1	0	0	原发不孕	2.54	＞24	35.8	女方因素	9	1.9	1274.16	0.96	9	6.42	4.21	41.49	1	18	17.8	A-B	IVF	6	0	4	0	0	0	0	否	否	全胚冷冻
790	0	C00019620	魏赢	≥35	35	1	拮抗剂方案	2	258.333	≤10天	9	≤3000	2325	HCG	1	1	0	继发不孕	1.41	＞24	30.1	女方因素	5	5.05	1683.21	1.23	7	6.8	4.21	19.27	2	20	10.2	A-B	IVF	3	0	2	1	2	2	0	否	是	移植	未妊娠
857	1	2018050008	冀萌	≥35	35	2	拮抗剂方案	2	317.045	＞10天	11	＞3000	3487.5	HCG	1	0	0	原发不孕	1.89	＞24	24.2	女方因素	5	3.07	1283	1.32	4	11.26	4.21	50	2	7	9.6	A	IVF	2	0	2	1	1	1	0	否	是	移植	未妊娠
1074	0	C00013221	曹玉平	≥35	43	1	拮抗剂方案	2	290.357	≤10天	7	≤3000	2032.5	HCG	5	3	1	继发不孕	1.24	≤24	20.6	男方因素	4	5.75	1567	1.09	5	6.42	4.21	41.49	2	10	12	A	IVF	4	0	2	0	2	2	0	否	是	移植	已妊娠	临床妊娠	宫内妊娠	单胎宫内妊娠
1245	1	2016040102	车秀平	≥35	46	1	刺激方案	1	300	≤10天	8	≤3000	2400	HCG	3	2	1	原发不孕	0.80	≤24	23.4	女方因素	3	3.05	926	0.96	3	16.35	4.21	73.77	4	4	11	A	IVF	3	0	3	0	0	0	0	否	否	全胚冷冻
1609	0	2018010149	冀萌	＜35	34	1	刺激方案	1	225	≤10天	7	≤3000	1575	HCG	1	0	0	原发不孕	1.7	＞24	24.2	男方因素	2	8.81	982	1.56	2	11.26	4.21	50	1	7	5	A	ICSI	1	0	1	0	0	0	0	否	否	全胚冷冻
1833	0	C00003351	张俊荣	≥35	48	2	拮抗剂方案	2	235.714	≤10天	7	≤3000	1650	双扳机	3	1	1	继发不孕	0.5	＞24	25.4	男方因素	2	10.17	484	0.94	2	6.23	4.21	32	4	3	9.8	10.17	ICSI	2	0	2	0	2	2	0	否	是	移植	未妊娠
2077	0	2018050012	张俊荣	≥35	47	1	拮抗剂方案	2	200	≤10天	10	≤3000	2000	HCG	3	1	1	继发不孕	0.32	＞24	25.4	女方因素	1	33	533	1.72	2	6.23	4.21	32	4	3	8.5	B-C	IVF	0	0	0	0	0	0	0	是		无可移植胚胎
294	0	C00004423	张晨	＜35	34	1	降调节方案	3	216.667	≤10天	9	≤3000	1950	HCG	3	0	0	原发不孕	1.59	≤24	21.2	女方因素	7	2.3	2737	1.27	9	6.85	4.22	47	1	13	0.81	A	IVF	6	0	2	1	2	2	0	否	是	移植	未妊娠
573	1	C00015477	马成丰	≥35	43	2	刺激方案	1	300	≤10天	10	≤3000	3000	HCG	4	1	1	继发不孕	1.53	＞24	26.2	女方因素	6	2.94	1724	0.56	6	13.45	4.22	14	2	9	11.8	A	IVF	2	0	2	0	2	2	0	否	是	移植	未妊娠
1072	0	2017020211	孟玲	≥35	44	1	降调节方案	3	175	＞10天	12	≤3000	2100	HCG	2	3	1	继发不孕	1.00	≤24	23.7	女方因素	4	9.5	1569	0.44	5	5.95	4.22	40	4	7	12.9	B	IVF	2	0	2	2	2	2	0	否	是	移植	已妊娠	临床妊娠	宫内妊娠	单胚胎停
182	0	2016080078	李申美	≥35	36	2	降调节方案	3	225	≤10天	10	≤3000	2250	HCG	8	0	0	原发不孕	2.09	≤24	22.8	混合因素	8	0.62	2284	0.86	7	6.45	4.23	64	2	20	18	A	ICSI	4	0	2	0	2	2	0	否	是	移植	已妊娠	临床妊娠	宫内妊娠	单胚胎停
183	1	C00009709	孟丛	＜35	29	2	刺激方案	1	300	≤10天	9	≤3000	2700	HCG	4	0	0	原发不孕	2.58	≤24	21.1	男方因素	8	6.55	2265	2.22	9	6.2	4.23	84.41	1	13	0.8	A	ICSI	4	0	0	0	0	0	0	是		无可移植胚胎
270	1	2017020142	郄慧芝	≥35	44	1	降调节方案	3	300	≤10天	9	≤3000	2700	HCG	2	1	1	继发不孕	2.45	≤24	23.4	女方因素	7	9.13	2274	0.64	7	6.85	4.23	59.86	2	10	10.6	A	IVF	1	0	1	0	0	0	0	否	否	全胚冷冻
335	0	2017020208	李申美	≥35	37	3	降调节方案	3	187.5	≤10天	10	≤3000	1875	HCG	1	1	0	继发不孕	4.02	≤24	22.8	混合因素	7	0.96	2009	0.87	9	5.45	4.23	64	2	20	18.7	A	ICSI	5	0	2	0	2	2	0	否	是	移植	未妊娠
337	0	2017060087	郄慧芝	≥35	44	2	刺激方案	1	290	≤10天	5	≤3000	1450	HCG	2	1	1	继发不孕	1.28	≤24	23.4	女方因素	7	1.58	1976	0.5	6	6.85	4.23	59.86	2	10	10.4	B	IVF	2	0	2	1	2	2	0	否	是	移植	未妊娠
488	1	2017030217	杨传梅	≥35	44	2	刺激方案	1	366.667	≤10天	9	＞3000	3300	HCG	4	6	2	继发不孕	0.93	＞24	25.6	女方因素	6	0.99	2620	0.64	6	12.04	4.23	73.77	4	8	11	B	IVF	3	0	2	1	0	0	0	否	否	全胚冷冻
828	0	2018070093	徐美丽	＜35	31	1	刺激方案	1	150	≤10天	7	≤3000	1050	HCG	2	0	0	继发不孕	1.82	≤24	22.7	女方因素	5	16.33	1445	1.32	6	5.46	4.23	77	1	11	5.1	A	IVF	2	1	1	0	0	0	0	否	否	全胚冷冻
837	1	2016090133	杨传梅	≥35	44	1	刺激方案	1	403.846	＞10天	13	＞3000	5250	HCG	4	6	2	继发不孕	0.93	＞24	25.6	女方因素	5	1.69	1401	1.25	5	12.04	4.23	73.77	4	8	8.7	B	IVF	3	0	0	0	0	0	0	是		无可移植胚胎
1289	1	2017070043	杨传梅	≥35	45	3	刺激方案	1	381.25	＞10天	12	＞3000	4575	HCG	4	6	2	继发不孕	0.93	＞24	25.6	女方因素	3	1.76	811	0.78	2	12.04	4.23	73.77	4	8	11.2	B	IVF	2	0	2	0	0	0	0	否	否	全胚冷冻
1353	1	2017050139	钟奕	≥35	46	4	刺激方案	1	300	≤10天	5	≤3000	1500	HCG	5	1	0	继发不孕	0.02	≤24	23.4	女方因素	3	16.38	570	0.67	2	15.78	4.23	35	4	3	11.6	A-B	IVF	0	0	0	0	0	0	0	是		无可移植胚胎
2119	0	C00007415	武文波	≥35	44	2	刺激方案	1	225	≤10天	6	≤3000	1350	HCG	1	5	0	继发不孕	0.20	≤24	22.7	男方因素	1	8.44	441	0.68	1	8.62	4.23	87.85	4	3	5.1	B	ICSI	1	0	1	1	0	0	0	否	否	全胚冷冻
2129	1	C00006871	武文波	≥35	44	1	拮抗剂方案	2	383.333	≤10天	9	＞3000	3450	双扳机	1	5	0	继发不孕	0.18	≤24	22.7	女方因素	1	14.92	416	0.19	1	8.62	4.23	87.85	4	3	6.9	A	IVF	1	0	0	0	1	1	0	否	是	移植	未妊娠
2176	1	2016120055	钟奕	≥35	45	3	刺激方案	1	423.214	＞10天	14	＞3000	5925	HCG	5	1	0	继发不孕	0.76	≤24	23.4	女方因素	1	2.43	312	0.72	1	16.78	4.23	35	4	3	10	A-B	IVF	1	0	0	0	0	0	0	是		无可移植胚胎
511	1	C00012154	李俊丽	＜35	30	1	拮抗剂方案	2	296.25	≤10天	10	≤3000	2962.5	双扳机	2	0	0	原发不孕	2.20	≤24	20	女方因素	6	1.08	2361	0.37	2	6.3	4.24	41.3	1	8	12.8	B	IVF	1	0	0	0	0	0	0	是		无可移植胚胎
560	1	2016040048	满英姿	≥35	42	1	降调节方案	3	300	＞10天	11	＞3000	3300	HCG	2	3	1	继发不孕	0.64	≤24	21.6	混合因素	6	10.53	1839	1.39	4	13.3	4.24	41.3	4	6	10.5	B	ICSI	3	0	2	1	2	2	0	否	是	移植	未妊娠
988	1	2016120224	顾新玲	≥35	38	1	降调节方案	3	300	≤10天	10	≤3000	3000	HCG	1	4	1	继发不孕	1.29	＞24	27.6	女方因素	4	2.44	1318	0.49	6	6.66	4.24	28	2	7	9.6	A	IVF	1	0	0	0	0	0	0	是		无可移植胚胎
1130	1	2016040126	夏燕	≥35	47	4	降调节方案	3	375	≤10天	10	＞3000	3750	HCG	12	0	0	原发不孕	0.47	＞24	27.7	女方因素	4	1.14	1344	1.43	4	15.48	4.24	96.43	4	6	8.5	A	IVF	4	0	2	2	2	2	0	否	是	移植	未妊娠
1232	0	2017070150	顾新玲	≥35	38	2	降调节方案	3	201.923	＞10天	13	≤3000	2625	HCG	1	4	1	继发不孕	2.23	＞24	27.6	女方因素	3	2.19	965	0.29	2	6.66	4.24	28	2	7	8.3	A-B	IVF	0	0	0	0	0	0	0	是		无可移植胚胎
1237	1	2016010063	夏燕	≥35	47	3	刺激方案	1	393.75	≤10天	8	＞3000	3150	HCG	12	0	0	原发不孕	0.54	＞24	27.7	女方因素	3	1.4	945	1.71	4	15.48	4.24	96.43	4	6	8.7	A-B	IVF	1	0	2	0	2	2	0	否	是	移植	未妊娠
1266	0	2017050159	夏燕	≥35	48	7	刺激方案	1	225	≤10天	8	≤3000	1800	HCG	13	0	0	原发不孕	0.71	＞24	27.7	女方因素	3	9.98	882	1.94	3	15.48	4.24	96.43	4	5	6	B	IVF	2	0	2	2	0	0	0	否	否	全胚冷冻
1345	1	2016070142	夏燕	≥35	48	5	刺激方案	1	375	≤10天	8	≤3000	3000	HCG	13	0	0	原发不孕	0.13	＞24	27.7	女方因素	3	0.81	610	0.8	5	15.48	4.24	96.43	4	6	10.3	A	IVF	4	0	4	3	2	2	0	否	是	移植	未妊娠
1525	1	2016090053	满英姿	≥35	42	2	刺激方案	1	300	≤10天	8	≤3000	2400	HCG	2	3	1	继发不孕	0.81	≤24	21.6	混合因素	3	4.24	811	0.53	4	13.3	4.24	41.3	4	6	11.1	B	ICSI	2	0	2	2	2	2	0	否	是	移植	未妊娠
1572	0	2017080269	夏燕	≥35	49	8	刺激方案	1	150	＞10天	11	≤3000	1650	HCG	13	0	0	原发不孕	0.47	＞24	27.7	女方因素	3	14.82	1072	0.5	2	15.48	4.24	96.43	4	4	7	B	IVF	2	0	2	2	0	0	0	否	否	全胚冷冻
1604	0	2017050046	满英姿	≥35	43	3	刺激方案	1	225	≤10天	8	≤3000	1800	HCG	2	3	1	继发不孕	1.17	≤24	21.6	男方因素	2	10.07	996	0.9	2	13.3	4.24	41.3	4	6	10	B	ICSI	2	0	1	0	0	0	0	否	否	全胚冷冻
1686	1	C00014570	姜祖娜	≥35	45	1	降调节方案	3	290.625	≤10天	8	≤3000	2325	HCG	3	3	1	继发不孕	0.47	＞24	28.4	女方因素	2	5.13	779.9	0.36	2	13.3	4.24	41.3	4	3	8.7	A-B	IVF	2	0	2	2	1	1	0	否	是	移植	未妊娠
2056	1	C00011143	尹晶	＜35	33	2	拮抗剂方案	2	300	＞10天	11	＞3000	3300	HCG	3	0	0	原发不孕	0.74	＞24	27.1	混合因素	1	9.71	634	1.48	0	13.3	4.24	41.3	3	2	9.4	A-B		0	0	0	0	0	0	0	是		未取到卵
809	0	2017110263	丁秋凤	≥35	40	1	拮抗剂方案	2	235.909	＞10天	11	≤3000	2595	HCG	2	2	1	继发不孕	2.340	≤24	21.9	混合因素	5	1.82	1561	0.93	6	6.98	4.25	45.76	2	8	12.5	A	ICSI	5	0	2	0	0	0	0	否	否	全胚冷冻
1313	1	2016080093	藏忠华	≥35	39	2	刺激方案	1	375	＞10天	12	＞3000	4500	HCG	9	1	0	继发不孕	0.97	＞24	29.3	女方因素	3	2.7	727	2.77	3	12.99	4.25	73.77	4	5	11	A	IVF	2	0	2	1	0	0	0	否	否	全胚冷冻
1962	0	2018070068	王洪英	≥35	40	1	刺激方案	1	287.5	＞10天	12	＞3000	3450	HCG	1	3	0	继发不孕	0.29	≤24	20.9	女方因素	2	9.44	480	1.68	2	15.68	4.25	62.42	4	4	5	A-B	IVF	2	0	1	0	0	0	0	否	否	全胚冷冻
225	1	2016020110	崔文娟	≥35	39	2	降调节方案	3	455.357	＞10天	14	＞3000	6375	HCG	2	3	0	继发不孕	1.55	≤24	23	不明原因	8	1.16	1548	1.06	5	9.19	4.26	66.06	2	12	13	A-B	IVF	3	0	2	2	2	2	0	否	是	移植	未妊娠
1062	0	2016040110	李芹	≥35	49	3	刺激方案	1	225	≤10天	7	≤3000	1575	HCG	9	4	1	继发不孕	0.48	＞24	24.2	女方因素	4	4.38	1643	0.33	3	17.78	4.26	45.42	4	4	7.2	A-B	IVF	3	0	2	0	0	0	0	否	否	全胚冷冻
1372	0	2016010036	李芹	≥35	49	2	刺激方案	1	225	≤10天	6	≤3000	1350	HCG	7	4	3	继发不孕	0.1	＞24	24.2	女方因素	3	14.65	470	0.92		17.78	4.26	35.42	4	4	7.7	B		0	0	0	0	0	0	0	是		未取卵
1618	0	2017020151	李芹	≥35	50	4	刺激方案	1	150	≤10天	6	≤3000	900	HCG	9	4	1	继发不孕	0.82	＞24	24.2	女方因素	2	8.14	956	1.2	1	17.78	4.26	65.69	4	4	6.2	B	IVF	1	0	0	0	0	0	0	是		无可移植胚胎
1753	0	2016100166	吕丹	＜35	27	1	刺激方案	1	190.533	＞10天	15	≤3000	2858	HCG	4	0	0	原发不孕	1.82	≤24	21.7	女方因素	2	0.89	623	0.43	3	11.45	4.26	18	1	7	13.6	A	IVF	1	0	1	1	1	1	0	否	是	移植	已妊娠	临床妊娠	宫内妊娠	单胎宫内妊娠
2016	0	C00008153	臧传兰	≥35	46	1	刺激方案	1	225	＞10天	12	≤3000	2700	HCG	3	3	1	继发不孕	0.43	＞24	25	女方因素	1	23.03	824	0.84	1	19.48	4.26	10	4	3	0.65	B	IVF	1	0	1	0	0	0	0	否	否	全胚冷冻
134	0	2018030241	刘芬	＜35	30	1	降调节方案	3	206.25	＞10天	12	≤3000	2475	HCG	4	0	0	原发不孕	3.070	≤24	19.8	不明原因	8	1.69	1623	1.55	4	7.36	4.27	61	1	8	18.1	B	IVF	2	0	2	0	0	0	0	否	否	全胚冷冻
776	0	2018010184	张红春	≥35	42	1	降调节方案	3	202.5	≤10天	10	≤3000	2025	HCG	5	2	1	继发不孕	0.904	≤24	22	女方因素	5	1.96	1777	0.44	4	18.27	4.27	12	4	7	8.4	A	IVF	4	0	4	0	2	2	0	否	是	移植	已妊娠	临床妊娠	宫内妊娠	单胚胎停
682	1	C00004401	陈学会	≥35	42	2	拮抗剂方案	2	385.227	＞10天	11	＞3000	4237.5	双扳机	1	3	1	继发不孕	1.83	≤24	22.6	女方因素	5	5.46	1804	1.25	6	9.12	4.28	32	2	15	10	A	IVF	3	0	3	2	2	2	0	否	是	移植	未妊娠
1032	0	2016060053	郭先红	＜35	34	1	刺激方案	1	225	≤10天	8	≤3000	1800	HCG	5	2	1	继发不孕	1.10	≤24	20.2	女方因素	4	2.61	1129	1.65	6	5.97	4.28	77	3	8	10.4	B	IVF	5	0	2	0	2	2	0	否	是	移植	已妊娠	临床妊娠	宫内妊娠	单胎宫内妊娠
1564	1	2017050262	王慧	＜35	28	1	刺激方案	1	300	≤10天	8	≤3000	2400	HCG	3	0	0	原发不孕	2.51	≤24	17.5	男方因素	3	1.64	1100	0.8	3	18.44	4.28	53	1	9	9.8	A	ICSI	3	0	3	2	0	0	0	否	否	全胚冷冻
291	1	2017120030	孟庆妹	≥35	45	3	拮抗剂方案	2	300	＞10天	15	＞3000	4500	双扳机	2	7	1	继发不孕	0.63	＞24	24.2	混合因素	3	1.86	662	0.57	4	12.88	4.29	80.6	4	6	7.1	A	ICSI	5	0	5	1	0	0	0	否	否	全胚冷冻
1514	0	2018040189	王书花	＜35	31	1	降调节方案	3	237.5	＞10天	12	≤3000	2850	HCG	3	2	0	继发不孕	4.12	≤24	22.5	女方因素	3	0.47	870	0.46	6	7.32	4.29	76.43	1	12	10.8	A	IVF	2	0	0	0	0	0	0	是		无可移植胚胎
2262	1	2017070172	孟庆妹	≥35	44	1	拮抗剂方案	2	325	≤10天	7	≤3000	2275	HCG	1	7	1	继发不孕	0.12	＞24	24.2	混合因素	3	5.11	826	0.48	3	12.88	4.29	40.1	4	6			ICSI	3	0	2	2	0	0	0	否	否	全胚冷冻
1739	0	C00004804	于承利	≥35	38	1	拮抗剂方案	2	150	≤10天	7	≤3000	1050	HCG	1	5	1	继发不孕	1.29	≤24	20	女方因素	2	1.8	651	0.27	2	16.54	4.3	35	2	8	6.6	A	IVF	2	0	0	0	0	0	0	是		无可移植胚胎
497	0	2017020158	李秀粉	≥35	40	2	刺激方案	1	150	≤10天	8	≤3000	1200	HCG	2	3	1	继发不孕	0.48	≤24	23.3	女方因素	6	10.73	2500	0.69	6	6.12	4.31	36	4	7	7.7	A	IVF	4	0	3	0	0	0	0	否	否	全胚冷冻
606	0	2016120032	李秀粉	≥35	40	1	刺激方案	1	283.333	≤10天	9	≤3000	2550	HCG	2	3	1	继发不孕	1.51	≤24	23.3	女方因素	6	1	1458	0.54	5	6.12	4.31	35.42	2	7	9.3	A	IVF	4	0	1	0	1	1	0	否	是	移植	未妊娠
619	0	C00003722	张新敏	≥35	43	1	拮抗剂方案	2	257.692	＞10天	13	＞3000	3350	双扳机	2	4	1	继发不孕	1.69	≤24	24	女方因素	6	5.59	1310	0.59	5	9.72	4.31	20	2	8	14	A	IVF	3	0	2	2	2	2	0	否	是	移植	未妊娠
957	1	2017040124	孟汝菁	＜35	28	1	刺激方案	1	400	＞10天	15	＞3000	6000	HCG	2	0	0	原发不孕	1.83	＞24	26.1	不明原因	4	9.94	536	1.87	1	5.97	4.31	32.32	1	9	4.2		IVF	0	0	0	0	0	0	0	是		无可移植胚胎
1101	0	C00015876	李开美	≥35	50	7	刺激方案	1	225	≤10天	8	≤3000	1800	HCG	9	3	3	继发不孕	0.31	≤24	21.5	女方因素	4	6.39	1444	0.78	3	10.92	4.31	55	4	6	5.8	B-C	IVF	0	0	0	0	0	0	0	是		无可移植胚胎
1295	1	C00012564	于洪英	＜35	31	2	刺激方案	1	300	≤10天	6	≤3000	1800	HCG	7	0	0	原发不孕	0.36	＞24	31.6	女方因素	3	9.32	786	1.51	3	12.99	4.31	26	3	4	0.72	A-B	IVF	1	0	0	0	0	0	0	是		无可移植胚胎
1677	0	C00013605	李开美	≥35	49	4	刺激方案	1	150	≤10天	10	≤3000	1500	HCG	9	3	3	继发不孕	0.16	≤24	21.5	女方因素	2	15.64	810	0.31	0	10.92	4.31	55	4	2	4.6	B		0	0	0	0	0	0	0	是		未取到卵
2109	0	C00011621	李开美	≥35	49	1	刺激方案	1	150	≤10天	7	≤3000	1050	HCG	9	3	3	继发不孕	0.16	≤24	21.5	女方因素	1	14.87	454	0.25	0	10.92	4.31	55	4	2	5.4	B		0	0	0	0	0	0	0	是		未取到卵
418	0	C00012846	赵贤梅	≥35	41	1	拮抗剂方案	2	285	≤10天	10	≤3000	2850	双扳机	2	3	1	继发不孕	1.45	＞24	28.6	女方因素	7	1.55	1102	2.33	8	9.37	4.32	48	2	10	0.88	B	IVF	5	0	4	1	0	0	0	否	否	全胚冷冻
1287	1	2016050212	冯国英	≥35	41	1	刺激方案	1	300	≤10天	10	≤3000	3000	HCG	2	4	2	继发不孕	0.95	＞24	29.3	女方因素	3	0.88	814	0.38	3	15.29	4.32	102	4	4	11	B	IVF	2	0	2	0	0	0	0	否	否	全胚冷冻
1327	0	2017090136	李靖	＜35	27	2	刺激方案	1	206.25	≤10天	8	≤3000	1650	HCG	3	1	0	继发不孕	2.71	≤24	22.9	混合因素	3	7.55	664	1.18	3	10.03	4.32	15	1	7	5.6	A	ICSI	3	0	0	0	0	0	0	是		无可移植胚胎
1592	1	2017050223	张英	≥35	42	1	降调节方案	3	318.75	＞10天	12	＞3000	3825	HCG	3	7	1	继发不孕	0.97	＞24	25.2	女方因素	3	1.17	1021	0.43	5	6.51	4.32	43	4	6	8.6	A	IVF	2	0	1	0	1	1	0	否	是	移植	已妊娠	临床妊娠	宫内妊娠	单胎宫内妊娠
1675	1	C00003542	李洪英	＜35	32	1	刺激方案	1	393.75	＞10天	12	＞3000	4725	HCG	2	2	1	继发不孕	0.91	≤24	22.8	女方因素	2	8.04	816	0.62	2	10.74	4.32	13	3	4	7.7	A-B	IVF	1	0	1	1	0	0	0	否	否	全胚冷冻
142	1	2018050026	李同	＜35	26	2	降调节方案	3	384.375	＞10天	16	＞3000	6150	HCG	2	0	0	原发不孕	2.89	＞24	33.2	男方因素	8	0.35	2243	1.88	5	7.35	4.33	36.43	1	15	13.1	A-B	ICSI	1	0	0	0	0	0	0	是		无可移植胚胎
272	0	C00010194	刘莹	≥35	39	1	拮抗剂方案	2	286.364	＞10天	11	＞3000	3150	HCG	1	4	2	继发不孕	4.56	≤24	21.8	女方因素	7	1.06	2217	1.6	9	6.6	4.33	41	2	14	0.92	A	IVF	7	2	4	0	2	2	0	否	是	移植	未妊娠
417	0	2017050261	孙英英	＜35	29	1	降调节方案	3	150	≤10天	10	≤3000	1500	HCG	4	0	0	原发不孕	2.74	≤24	22.7	女方因素	7	0.41	1135	1.03	5	7.13	4.33	41	1	12	11.4	A	IVF	4	0	4	3	2	2	0	否	是	移植	已妊娠	临床妊娠	宫内妊娠	双胎宫内妊娠
596	1	2018040206	邹丽艳	≥35	35	1	降调节方案	3	390.909	＞10天	11	＞3000	4300	HCG	5	0	0	原发不孕	5.23	≤24	21.3	女方因素	6	1.62	1539	0.58	7	6.4	4.33	27.19	2	12	10.8	A-B	IVF	5	0	1	0	0	0	0	否	否	全胚冷冻
1888	1	C00011610	刘莹	≥35	40	2	刺激方案	1	300	≤10天	7	≤3000	2100	HCG	1	4	2	继发不孕	1.24	≤24	21.8	女方因素	6	6.38	1191	1.24	7	6.6	4.33	31	2	11	0.72	A	IVF	2	0	2	1	0	0	0	否	否	全胚冷冻
283	1	2017090054	林海燕	≥35	43	1	刺激方案	1	393.75	＞10天	12	＞3000	4725	HCG	10	0	0	继发不孕	0.87	＞24	28.2	女方因素	7	2.65	2081	0.94	7	12.3	4.34	40.03	4	7	13.5	B	IVF	4	0	2	1	0	0	0	否	否	全胚冷冻
1083	1	2016080191	郝玉婷	≥35	36	1	降调节方案	3	354.545	＞10天	11	＞3000	3900	HCG	4	1	0	继发不孕	2.1	≤24	23.4	女方因素	4	5.08	1520	1.88	2	8.36	4.34	66.61	2	11	8.4	A	IVF	1	0	1	0	1	1	0	否	是	移植	未妊娠
1112	1	C00009824	林海燕	≥35	45	3	刺激方案	1	450	＞10天	12	＞3000	5400	HCG	10	1	0	继发不孕	0.87	＞24	28.2	女方因素	4	4.21	1404	0.99	3	12.3	4.34	40.03	4	4	11.1	B	IVF	1	0	1	0	0	0	0	否	否	全胚冷冻
1292	1	2016040211	赵勤	≥35	43	1	刺激方案	1	300	≤10天	6	≤3000	1800	HCG	2	2	0	继发不孕	0.7	＞24	25.3	男方因素	3	2.5	804	0.46	1	13.03	4.34	46	4	4	13.8	A-B	ICSI	1	0	1	1	0	0	0	否	否	全胚冷冻
1354	0	2017030009	郝玉婷	≥35	37	2	降调节方案	3	231.818	＞10天	11	≤3000	2550	HCG	4	1	0	继发不孕	1.45	≤24	23.4	女方因素	3	7.62	567	0.56	2	8.36	4.34	66.61	2	11	11.1	A	IVF	1	0	0	0	0	0	0	是		无可移植胚胎
1357	1	2017060202	郝玉婷	≥35	37	3	降调节方案	3	412.5	＞10天	12	＞3000	4950	HCG	4	1	0	继发不孕	1.37	≤24	23.4	女方因素	3	7.51	553	0.71	1	8.36	4.34	66.61	2	11	9.8	A	IVF	1	0	0	0	0	0	0	是		无可移植胚胎
1462	1	C00013829	臧红梅	≥35	39	1	降调节方案	3	315.625	＞10天	12	＞3000	3787.5	HCG	7	3	0	继发不孕	0.22	≤24	22.8	女方因素	3	3.21	961	1.24	4	9.94	4.34	22	4	6	12.5	A-B	IVF	4	0	2	2	2	2	0	否	是	移植	未妊娠
2058	0	2017120055	林海燕	≥35	43	2	刺激方案	1	225	≤10天	10	≤3000	2250	HCG	10	0	0	继发不孕	0.87	＞24	28.2	不明原因	1	4.73	619	0.68	1	12.3	4.34	40.03	4	7	8	B	IVF	0	0	0	0	0	0	0	是		无可移植胚胎
556	1	2018030242	党玉霞	≥35	42	1	刺激方案	1	345	≤10天	10	＞3000	3450	HCG	5	0	0	原发不孕	2.27	≤24	22.3	男方因素	6	14.96	1856	2.18	6	12.34	4.35	60	2	10	7	A	ICSI	3	0	2	1	0	0	0	否	否	全胚冷冻
985	1	2018070049	党玉霞	≥35	42	2	刺激方案	1	350	≤10天	9	＞3000	3150	HCG	5	0	0	原发不孕	1.47	≤24	22.3	男方因素	4	16.11	1338	1.57	4	12.34	4.35	60	2	10	5.2	A-B	ICSI	0	0	0	0	0	0	0	是		无可移植胚胎
1058	1	C00016021	张春燕	＜35	32	2	降调节方案	3	323.077	＞10天	13	＞3000	4200	HCG	4	0	0	原发不孕	1.4	≤24	19.7	男方因素	4	1.5	1671	0.74	4	16.9	4.35	17	1	8	12.1	A	ICSI	2	0	2	0	2	2	0	否	是	移植	未妊娠
1403	1	C00006379	党玉霞	≥35	44	4	拮抗剂方案	2	416.667	≤10天	9	＞3000	3750	双扳机	5	0	0	原发不孕	2.72	≤24	22.3	混合因素	3	1.83	882	0.97	5	12.34	4.35	60	2	10	0.91	A	ICSI	3	0	2	2	0	0	0	否	否	全胚冷冻
2054	1	C00014848	张春燕	＜35	31	1	拮抗剂方案	2	359.615	＞10天	13	＞3000	4675	HCG	4	0	0	原发不孕	1.69	≤24	19.7	女方因素	1	37.96	644	1.33	1	16.9	4.35	17	1	8	13.6	A-B	IVF	1	0	0	0	0	0	0	是		无可移植胚胎
2198	0	C00005693	赵艳霞	≥35	39	6	刺激方案	1	285	≤10天	10	≤3000	2850	HCG	2	3	1	继发不孕	0.23	＞24	24.5	混合因素	1	34.52	268	1.2	0	12.66	4.35	73.77	4	1	10.5	A		0	0	0	0	0	0	0	是		未取到卵
209	1	C00017037	邝玲芝	＜35	33	1	降调节方案	3	301.923	＞10天	13	＞3000	3925	HCG	5	3	1	继发不孕	2.87	≤24	20.7	女方因素	8	2.05	1826	1.08	8	7.54	4.36	51	1	10	11.4		IVF	5	0	4	2	2	2	0	否	是	移植	已妊娠	临床妊娠	宫外妊娠	异位妊娠
480	1	2017100003	李涵	＜35	33	2	刺激方案	1	384.375	＞10天	16	＞3000	6150	HCG	6	0	0	原发不孕	1.02	＞24	25.7	女方因素	6	5.84	1724	1.34	1	10.7	4.36	87.09	3	5	10.8	A	IVF	1	0	0	0	0	0	0	是		无可移植胚胎
482	1	2017040144	张立伟	＜35	29	1	刺激方案	1	300	＞10天	11	＞3000	3300	HCG	3	0	0	原发不孕	1.2	≤24	20.7	女方因素	6	1.52	1698	1.48	5	7.91	4.36	50.1	1	8	12.6	A-B	IVF	4	0	2	1	0	0	0	否	否	全胚冷冻
1085	1	C00007358	李涵	≥35	36	7	刺激方案	1	422.727	＞10天	11	＞3000	4650	HCG	6	0	0	原发不孕	1.02	＞24	25.7	男方因素	4	4.01	1500	0.67	3	10.7	4.36	87.09	4	6	0.81	A	ICSI	1	0	0	0	0	0	0	是		无可移植胚胎
1311	1	2018030228	李涵	＜35	34	3	刺激方案	1	300	≤10天	8	≤3000	2400	HCG	6	0	0	原发不孕	1.02	＞24	25.7	女方因素	3	5.21	733	0.92	2	10.7	4.36	87.09	3	5	7.6	B	IVF	1	0	1	0	0	0	0	否	否	全胚冷冻
1427	1	C00006282	成海燕	≥35	41	1	刺激方案	1	358.333	≤10天	9	＞3000	3225	HCG	1	5	1	继发不孕	1.0	＞24	26.4	女方因素	3	4.13	967	0.57	3	8.35	4.36	38	4	7	0.4	B	IVF	1	0	2	0	0	0	0	否	否	全胚冷冻
1438	1	2018050104	李涵	＜35	34	4	刺激方案	1	450	＞10天	12	＞3000	5400	HCG	6	0	0	原发不孕	1.02	＞24	25.7	女方因素	3	5.13	934	1.41	2	10.7	4.36	87.09	3	7	9.7	A-B	IVF	0	0	0	0	0	0	0	是		未受精
1562	1	2016020162	仇清华	＜35	31	2	降调节方案	3	375	＞10天	11	＞3000	4125	HCG	4	0	0	原发不孕	2.712	≤24	20.9	女方因素	3	1.75	1104	0.97	2	8.53	4.36	47.4	1	7	10.5	A	IVF	1	0	1	0	1	1	0	否	是	移植	未妊娠
1566	1	C00011962	沈彤	＜35	33	1	刺激方案	1	345	＞10天	20	＞3000	6900	HCG	9	2	0	原发不孕	0.89	＞24	24.2	不明原因	3	18.54	1097	0.79	2	16.79	4.36	14	3	4	7.1	B	ICSI	2	0	2	0	2	2	0	否	是	移植	未妊娠
1570	0	C00011063	成海燕	≥35	42	2	刺激方案	1	225	≤10天	10	≤3000	2250	HCG	1	5	1	继发不孕	1.26	＞24	26.4	女方因素	3	8.33	1081	1.25	4	8.35	4.36	38	2	8	0.44	B	IVF	2	0	3	1	0	0	0	否	否	全胚冷冻
1590	1	2016080160	李涵	＜35	32	1	刺激方案	1	450	＞10天	12	＞3000	5400	HCG	6	0	0	原发不孕	1.02	＞24	25.7	女方因素	3	3.54	1026	1.63	5	10.7	4.36	87.09	3	7	10.5	A	IVF	3	0	1	0	1	1	0	否	是	移植	未妊娠
1610	1	C00004389	李涵	≥35	35	6	刺激方案	1	375	≤10天	9	＞3000	3375	HCG	6	0	0	原发不孕	1.02	＞24	25.7	女方因素	2	4.88	981	0.66	1	10.7	4.36	87.09	4	6	0.8	B	IVF	0	0	0	0	0	0	0	是		未受精
1715	0	2018060130	李涵	＜35	34	5	刺激方案	1	225	≤10天	6	≤3000	1350	HCG	6	0	0	原发不孕	1.02	＞24	25.7	女方因素	2	4.14	719	0.34	2	10.7	4.36	87.09	3	6	11.5	A-B	IVF	2	0	1	0	0	0	0	否	否	全胚冷冻
1822	1	2017120110	殷红霞	≥35	42	2	拮抗剂方案	2	397.5	＞10天	20	＞3000	7950	双扳机	0	2	1	继发不孕	0.58	＞24	26	混合因素	2	2.49	506	1.25	3	11.15	4.36	76.43	4	6	7.7	A	ICSI	2	0	1	1	0	0	0	否	否	全胚冷冻
138	1	2016020069	刘玉华	≥35	40	1	刺激方案	1	300	≤10天	8	≤3000	2400	HCG	3	1	0	继发不孕	1.8	≤24	22	女方因素	6	4.33	2010	0.91	9	11.7	4.37	33	2	10	8.6	A	IVF	7	0	5	1	2	2	0	否	是	移植	已妊娠	临床妊娠	宫内妊娠	单胚胎停
568	0	C00008992	刘玉欣	＜35	34	1	降调节方案	3	262.5	≤10天	8	≤3000	2100	HCG	3	0	0	原发不孕	2.29	≤24	23.4	女方因素	6	4.39	1778	1.48	8	16.58	4.37	37	1	14	10	A	IVF	6	0	4	0	2	2	0	否	是	移植	未妊娠
1305	0	2017080013	牛玉	≥35	38	2	刺激方案	1	216.667	≤10天	9	≤3000	1950	HCG	1	2	1	继发不孕	4.63	≤24	23.6	男方因素	3	0.5	764	0.76	3	7.16	4.37	43	2	9	6.8	B	ICSI	3	0	2	0	0	0	0	否	否	全胚冷冻
1688	1	C00004809	李英	≥35	43	1	刺激方案	1	293.182	＞10天	11	＞3000	3225	HCG	2	1	1	继发不孕	0.33	≤24	23.4	女方因素	2	8.45	778	0.45	2	8.11	4.37	60	4	4	9.8	A	IVF	2	0	1	0	1	1	0	否	是	移植	未妊娠
1841	0	2017040012	任晓军	≥35	43	3	拮抗剂方案	2	150	≤10天	5	≤3000	750	HCG	3	1	1	继发不孕	0.07	≤24	19.8	女方因素	2	21.41	463	0.76		16.6	4.37	88.08	4	2	11.3	A		0	0	0	0	0	0	0	是		未取卵
2106	0	2016110164	任晓军	≥35	42	2	刺激方案	1	150	≤10天	6	≤3000	900	HCG	3	1	1	继发不孕	0.07	≤24	19.8	女方因素	1	7.35	458	0.42	2	16.6	4.37	88.08	4	2	10.8	A	IVF	0	0	0	0	0	0	0	是		无可移植胚胎
2112	0	2018050055	刘金凤	≥35	40	1	降调节方案	3	150	≤10天	10	≤3000	1500	HCG	2	2	1	继发不孕	0.9	≤24	23.8	女方因素	1	24.45	451	1.06	1	17.16	4.37	78	4	3	9.3	A	IVF	0	0	0	0	0	0	0	是		未受精
2257	1	2018040280	任晓军	≥35	44	6	拮抗剂方案	2	319.231	＞10天	13	＞3000	4150	双扳机	3	1	1	继发不孕	0.21	≤24	19.8	女方因素	1	17.48	339	1.09	0	16.6	4.37	88.08	4	2				0	0	0	0	0	0	0	是		未取到卵
1231	0	2018020041	刘甜	＜35	28	1	降调节方案	3	225	＞10天	12	≤3000	2700	HCG	2	1	0	继发不孕	1.56	＞24	24.2	女方因素	3	3.16	967	1.06	3	8.51	4.38	93	1	8	11.1	A-B	IVF	3	0	2	0	2	2	0	否	是	移植	未妊娠
443	1	2017050099	王晓峰	≥35	42	1	降调节方案	3	350	≤10天	8	≤3000	2800	HCG	2	3	2	继发不孕	0.47	≤24	22.6	女方因素	6	8.22	1846.72	1.08	5	10.5	4.39	78	4	4	16.9	A-B	IVF	5	0	2	1	0	0	0	否	否	全胚冷冻
635	1	2017100191	石金玲	≥35	37	4	刺激方案	1	300	≤10天	7	≤3000	2100	HCG	3	2	1	继发不孕	1.56	≤24	23.5	女方因素	6	2.21	1276	2.14	6	7.13	4.39	34.34	2	10	9.7	B	IVF	3	0	3	1	0	0	0	否	否	全胚冷冻
1115	0	2018070141	王晓峰	≥35	43	5	降调节方案	3	168.75	＞10天	16	≤3000	2700	HCG	3	3	2	继发不孕	0.67	≤24	22.6	女方因素	4	6.64	1392	0.45	4	10.5	4.39	99.09	4	4	8.9	B	IVF	1	0	3	0	0	0	0	否	否	全胚冷冻
1622	1	C00005022	王晓峰	≥35	44	6	降调节方案	3	383.333	≤10天	9	＞3000	3450	HCG	3	3	2	继发不孕	0.84	≤24	22.6	女方因素	2	8.72	945	0.64	2	10.5	4.39	78	4	4	9.9	A-B	IVF	2	0	2	0	0	0	0	否	否	全胚冷冻
1774	1	2018020011	王晓峰	≥35	43	2	降调节方案	3	435	≤10天	5	≤3000	2175	HCG	3	3	2	继发不孕	0.12	≤24	22.6	男方因素	2	6.12	594	0.13	2	10.5	4.39	47.4	4	4	13.1	A-B	ICSI	1	0	1	0	1	1	0	否	是	移植	未妊娠
2013	0	2018060201	王晓峰	≥35	43	4	降调节方案	3	150	≤10天	9	≤3000	1350	HCG	3	3	2	继发不孕	0.45	≤24	22.6	女方因素	1	14.35	841	0.38		10.5	4.39	59.09	4	4	13.4	B-C		0	0	0	0	0	0	0	是		未取卵
2024	1	2018050006	王晓峰	≥35	43	3	降调节方案	3	337.5	≤10天	10	＞3000	3375	HCG	3	3	2	继发不孕	0.80	≤24	22.6	女方因素	1	8.87	738	0.8	0	10.5	4.39	78	4	4	7			0	0	0	0	0	0	0	是		未取到卵
275	1	2017080115	王静	＜35	31	1	刺激方案	1	300	≤10天	9	≤3000	2700	HCG	1	1	0	继发不孕	1.78	≤24	22.5	女方因素	7	8.78	2153	0.96	8	6.38	4.4	33.36	1	11	9	A-B	IVF	4	0	2	0	0	0	0	否	否	全胚冷冻
1069	1	C00009872	徐春红	≥35	45	3	刺激方案	1	450	≤10天	9	＞3000	4050	HCG	2	2	1	继发不孕	0.75	＞24	29.8	女方因素	4	0.88	1586	1.07	4	9.84	4.4	13	4	7	0.68	B	IVF	1	0	1	1	0	0	0	否	否	全胚冷冻
1318	0	2018020093	韩露	＜35	26	2	降调节方案	3	150	≤10天	9	≤3000	1350	HCG	1	0	0	原发不孕	1.74	≤24	18.4	男方因素	3	1.04	711	0.55	6	9.63	4.4	34.56	1	20	12.5	A	ICSI	4	0	1	1	1	1	0	否	是	移植	已妊娠	临床妊娠	宫内妊娠	单胎宫内妊娠
1347	1	C00006654	何华珍	≥35	49	2	刺激方案	1	375	≤10天	9	＞3000	3375	HCG	1	6	2	继发不孕	0.31	≤24	19.6	女方因素	3	28.6	600	1.45	3	18.9	4.4	35	4	4	0.41	B	IVF	3	0	2	0	0	0	0	否	否	全胚冷冻
2081	1	2017120027	吴翠霞	≥35	44	2	拮抗剂方案	2	343.75	＞10天	12	＞3000	4125	HCG	3	2	1	继发不孕	0.680	≤24	19.9	混合因素	1	11.05	514	0.84		16.36	4.4	61.55	4	3	7.3	A		0	0	0	0	0	0	0	是		未取卵
118	0	C00004832	杨晓燕	≥35	39	2	降调节方案	3	206.25	＞10天	12	≤3000	2475	HCG	2	2	1	继发不孕	1.781	＞24	30.1	女方因素	9	3.34	1386	0.62	5	6.04	4.41	69.73	2	17	1.21	A	IVF	4	0	2	0	0	0	0	否	否	全胚冷冻
1020	0	2017090066	公庆会	≥35	43	3	刺激方案	1	182.143	≤10天	7	≤3000	1275	HCG	5	3	1	继发不孕	2.48	≤24	23.4	女方因素	4	5.73	1194	1.49	5	8.89	4.42	38.64	2	14	11.3	A-B	IVF	3	0	2	0	2	2	0	否	是	移植	未妊娠
1893	0	2016070166	汲君	≥35	46	2	刺激方案	1	270	≤10天	10	≤3000	2700	HCG	3	3	0	继发不孕	0.61	≤24	21.4	女方因素	2	22.67	196	1.42		15.9	4.42	42	4	3	6.5	A		0	0	0	0	0	0	0	是		未取卵
506	1	C00011785	孙淼	≥35	37	3	刺激方案	1	375	≤10天	10	＞3000	3750	HCG	3	1	0	原发不孕	1.24	≤24	20.3	女方因素	6	8.73	2422	0.6	3	9.69	4.43	47	2	8	7.6	B	IVF	3	0	2	0	0	0	0	否	否	全胚冷冻
528	0	2018020067	陆婷婷	＜35	29	1	降调节方案	3	287.5	＞10天	12	＞3000	3450	HCG	2	1	0	继发不孕	1.48	≤24	21.5	女方因素	6	2.2	2159	1.3	6	6.62	4.43	50.1	1	10	10.6	A	IVF	5	0	2	0	2	2	0	否	是	移植	未妊娠
1614	0	2017080061	胡芳	＜35	31	1	刺激方案	1	204.545	＞10天	11	≤3000	2250	HCG	2	0	0	原发不孕	2.55	＞24	29.6	女方因素	2	7.24	971	0.71	5	10.89	4.43	21	1	6	9.2	B	IVF	4	0	2	0	0	0	0	否	否	全胚冷冻
1650	1	C00013468	张玉华	≥35	44	1	刺激方案	1	332.143	≤10天	7	≤3000	2325	HCG	3	3	1	继发不孕	1.01	＞24	26.8	女方因素	2	8.8	865	0.88	4	7.77	4.43	106.43	4	7	6.1	B	IVF	3	0	1	0	0	0	0	否	否	全胚冷冻
2152	1	C00008628	孙淼	≥35	36	1	刺激方案	1	350	≤10天	5	≤3000	1750	双扳机	3	1	0	原发不孕	1.47	≤24	23.4	女方因素	1	27.85	365	4.73		9.69	4.43	47	2	8	10.6	A-B		0	0	0	0	0	0	0	是		未取卵
2242	0	C00014805	张玉华	≥35	44	2	拮抗剂方案	2	262.5	≤10天	8	≤3000	2100	双扳机	3	3	1	继发不孕	0.12	＞24	26.8	女方因素	1	3.57	478	0.5	2	7.77	4.43	76.43	4	7	10.6	A	IVF	0	0	0	0	0	0	0	是		无可移植胚胎
66	1	2016030073	周艳华	＜35	34	1	降调节方案	3	293.75	≤10天	8	≤3000	2350	HCG	4	2	1	继发不孕	3.21	≤24	22.4	女方因素	7	0.5	2525	1.08	8	8.16	4.44	34	1	19	11.2	A	IVF	5	0	4	0	2	2	0	否	是	移植	未妊娠
1480	0	2018030089	刘彩	≥35	47	2	拮抗剂方案	2	281.25	≤10天	4	≤3000	1125	HCG	3	5	1	继发不孕	1.92	＞24	25	混合因素	3	2.01	862.71	0.7	4	7.57	4.44	60	2	8	10.1	B-C	ICSI	2	0	2	1	2	2	0	否	是	移植	未妊娠
372	0	C00006388	闫正芳	≥35	43	1	降调节方案	3	214.286	＞10天	14	≤3000	3000	HCG	3	3	1	继发不孕	1.41	≤24	24	女方因素	7	1.09	1671	0.87	7	11.11	4.45	10	2	12	1.17	A	IVF	3	0	2	1	2	2	0	否	是	移植	未妊娠
406	0	2016050250	王敏敏	≥35	39	2	降调节方案	3	220.385	＞10天	13	≤3000	2865	HCG	2	0	0	原发不孕	1.213	＞24	29.1	女方因素	7	1.08	1273	0.76	5	5.34	4.45	29	2	11	14.8	A-B	IVF	3	0	0	0	0	0	0	是		无可移植胚胎
494	0	C00008606	闫正芳	≥35	43	2	降调节方案	3	271.154	＞10天	13	＞3000	3525	HCG	3	3	1	继发不孕	1.87	≤24	24	女方因素	6	1.65	2531	1.32	6	11.11	4.45	10	2	12	1	A-B	IVF	3	0	2	0	0	0	0	否	否	全胚冷冻
703	0	2016080222	邓祥红	≥35	40	2	降调节方案	3	225	＞10天	12	≤3000	2700	HCG	1	4	1	继发不孕	1.43	＞24	25.3	女方因素	5	10.06	1671	1.45	8	6.89	4.45	73.77	2	14	7.8	A	IVF	5	0	4	2	2	2	0	否	是	移植	已妊娠	临床妊娠	宫内妊娠	单胚胎停
1189	0	C00016488	柳萌萌	≥35	40	1	刺激方案	1	225	≤10天	8	≤3000	1800	HCG	10	0	0	原发不孕	0.29	≤24	21.2	女方因素	4	1.9	1101	0.67	3	17.64	4.45	41	4	7	10	A	IVF	0	0	0	0	0	0	0	是		无可移植胚胎
1560	1	2017060019	陈明霞	≥35	46	2	刺激方案	1	300	≤10天	9	≤3000	2700	HCG	1	5	2	继发不孕	1.54	≤24	22.9	混合因素	3	2.35	1105	1.31	4	11.64	4.45	41	2	6	8.6	A	ICSI	4	0	2	0	0	0	0	否	否	全胚冷冻
1666	0	C00006408	黄喜欢	≥35	37	3	刺激方案	1	281.25	≤10天	8	≤3000	2250	HCG	10	0	0	原发不孕	1.76	≤24	22.3	混合因素	2	7.24	833	1.26	2	9.99	4.45	67	4	4	4.7	A-B	ICSI	2	0	1	0	0	0	0	否	否	全胚冷冻
2070	0	C00011978	郝照华	≥35	43	2	拮抗剂方案	2	150	≤10天	9	≤3000	1350	HCG	3	0	0	原发不孕	0.78	≤24	21.5	混合因素	1	31.85	562	0.56	1	13	4.45	22	4	4	13	A-B	ICSI	0	0	0	0	0	0	0	是		无可移植胚胎
2158	0	C00013223	齐妍飞	≥35	36	2	拮抗剂方案	2	150	≤10天	9	≤3000	1350	HCG	6	1	1	继发不孕	1.22	＞24	27	女方因素	1	8.64	348	0.21	2	10.66	4.45	38	2	6	1	A-B	IVF	1	0	2	1	2	2	0	否	是	移植	未妊娠
192	0	C00018354	刘耐璐	＜35	28	2	降调节方案	3	278.571	＞10天	14	＞3000	3900	HCG	1	0	0	原发不孕	3.95	≤24	18.8	男方因素	8	0.61	2116.28	0.41	6	6.24	4.46	42	1	12	12.3	A-B	ICSI	4	0	2	1	2	2	0	否	是	移植	未妊娠
265	1	C00016909	侯尧	＜35	32	1	刺激方案	1	342.857	≤10天	7	≤3000	2400	HCG	1	2	0	继发不孕	1.77	≤24	19.8	女方因素	7	11.6	2418	1.56	5	10.11	4.46	53	1	9	0.4	A-B	IVF	1	0	1	0	0	0	0	否	否	全胚冷冻
941	0	2016120028	王玉娥	＜35	33	1	降调节方案	3	262.5	≤10天	8	≤3000	2100	HCG	3	0	0	原发不孕	4.12	≤24	20.6	混合因素	4	0.19	805	0.88	9	6.24	4.46	42	1	14	14.5	A	ICSI	8	0	4	1	2	2	0	否	是	移植	未妊娠
1138	1	C00004315	朱翠珍	≥35	46	1	拮抗剂方案	2	300	＞10天	17	＞3000	5100	双扳机	3	4	1	继发不孕	0.75	≤24	22.5	男方因素	4	3.38	1317	0.52	3	9.76	4.47	79	4	8	8.9	A	ICSI	3	0	0	0	0	0	0	是		无可移植胚胎
344	1	C00006670	赵春红	≥35	40	1	刺激方案	1	450	≤10天	10	＞3000	4500	HCG	7	1	1	继发不孕	1.3	＞24	33.2	女方因素	7	5	1876	1.2	3	5.52	4.48	52	2	7	1.78	B	IVF	2	0	2	0	0	0	0	否	否	全胚冷冻
392	0	2016120213	刘庆娥	≥35	35	1	刺激方案	1	180	≤10天	10	≤3000	1800	HCG	3	4	1	继发不孕	1.32	≤24	19.2	混合因素	7	13.08	1409	1.06	6	12.02	4.48	53	2	8	9.3	A	ICSI	4	0	4	1	2	2	0	否	是	移植	未妊娠
921	1	C00006116	邹丽艳	≥35	37	2	拮抗剂方案	2	412.5	≤10天	10	＞3000	4125	HCG	6	0	0	原发不孕	1.85	≤24	21.3	女方因素	4	3.54	928	0.44	5	12.14	4.48	18	2	12	10.5	A	IVF	4	0	4	3	2	2	0	否	是	移植	已妊娠	临床妊娠	宫内妊娠	单胎宫内妊娠
1721	0	2016020160	支红燕	≥35	48	3	降调节方案	3	184.091	＞10天	11	≤3000	2025	HCG	1	5	1	继发不孕	0.19	≤24	21.2	混合因素	2	12.93	711	1.85		6.18	4.48	87	4	2	11.1	B		0	0	0	0	0	0	0	是		未取卵
1754	1	2016030263	张吉明	≥35	37	1	降调节方案	3	325	＞10天	12	＞3000	3900	HCG	5	1	1	继发不孕	1.8	＞24	31.2	女方因素	2	4.89	623	0.94	3	7.78	4.48	86.43	2	10	15	A	IVF	1	0	1	0	0	0	0	否	否	全胚冷冻
1856	1	2016080230	张吉明	≥35	38	2	刺激方案	1	401.786	＞10天	14	＞3000	5625	HCG	5	1	1	继发不孕	3.48	＞24	31.2	女方因素	2	0.45	404	0.45	3	7.78	4.48	86.43	2	10	13.5	B	IVF	2	0	1	0	0	0	0	否	否	全胚冷冻
38	0	C00005141	王俊霞	≥35	35	1	降调节方案	3	206.25	＞10天	12	≤3000	2475	HCG	1	2	0	继发不孕	1.57	≤24	22	男方因素	9	4.07	1322	0.59	7	4.78	4.49	43.5	2	11	10.9	A	ICSI	1	0	1	0	0	0	0	否	否	全胚冷冻
452	1	C00016712	郭玲玲	＜35	33	2	刺激方案	1	300	≤10天	7	≤3000	2100	HCG	7	0	0	原发不孕	1.87	≤24	22.6	女方因素	6	12.48	1778	1.93	6	9.91	4.49	31	1	9	0.52	B-C	IVF	4	0	2	1	0	0	0	否	否	全胚冷冻
720	1	2018070011	衣艳斐	≥35	37	2	降调节方案	3	293.75	＞10天	12	＞3000	3525	HCG	2	2	2	继发不孕	2.51	＞24	24.4	女方因素	5	3.41	1570	0.75	6	8.87	4.49	82	2	10	8.4	A-B	IVF	3	0	2	1	2	2	0	否	是	移植	已妊娠	临床妊娠	宫内妊娠	单胎宫内妊娠
775	1	C00014629	郭玲玲	＜35	32	1	刺激方案	1	300	＞10天	12	＞3000	3600	HCG	7	0	0	原发不孕	1.4	≤24	22.6	女方因素	5	22.29	1782	2.15	1	9.91	4.49	31	1	9	0.47	B	IVF	1	0	1	0	0	0	0	否	否	全胚冷冻
930	0	C00019332	孟凤娟	≥35	37	2	刺激方案	1	253.846	＞10天	13	＞3000	3300	HCG	3	2	1	继发不孕	1.4	≤24	20.7	女方因素	4	41.17	862.71	2.27	2	10.64	4.49	69.09	2	8	9.2	A	IVF	1	0	0	0	0	0	0	是		无可移植胚胎
978	0	2016060081	王发娜	＜35	34	3	刺激方案	1	285	≤10天	10	≤3000	2850	HCG	3	0	0	原发不孕	1.4	≤24	22.4	不明原因	4	13.03	1360	1.38	3	8.03	4.49	42.05	1	6	8.3	B	IVF	1	0	0	0	0	0	0	是		无可移植胚胎
1181	0	C00004540	陈小焕	＜35	30	1	拮抗剂方案	2	228.409	＞10天	11	≤3000	2512.5	HCG	6	1	1	继发不孕	1.20	≤24	21.5	女方因素	4	9.17	1129	0.81	3	12.8	4.49	41	1	10	11.5	A	IVF	2	0	1	1	1	1	0	否	是	移植	已妊娠	临床妊娠	宫内妊娠	单胎宫内妊娠
1495	1	C00012040	贺晓方	≥35	39	1	刺激方案	1	300	≤10天	10	≤3000	3000	HCG	9	0	0	原发不孕	0.01	≤24	20.7	女方因素	3	26.69	968	0.92	1	12.8	4.49	41	4	3	0.46	B	IVF	0	0	0	0	0	0	0	是		无可移植胚胎
1561	0	C00003765	王淑霞	≥35	42	2	刺激方案	1	150	≤10天	7	≤3000	1050	HCG	3	2	1	继发不孕	1.12	＞24	25.9	女方因素	3	5.18	1105	0.95	2	8.62	4.49	90.1	4	4	8	B	IVF	0	0	1	0	0	0	0	否	否	全胚冷冻
1770	1	2017030100	王发娜	≥35	35	4	刺激方案	1	300	≤10天	9	≤3000	2700	HCG	3	0	0	原发不孕	1.42	≤24	22.4	不明原因	2	1.36	599	2.49	1	8.03	4.49	42.05	2	6	9.9	B	IVF	1	0	1	1	0	0	0	否	否	全胚冷冻
1956	1	2018060185	王淑霞	≥35	42	1	刺激方案	1	300	≤10天	7	≤3000	2100	HCG	3	2	1	继发不孕	0.16	＞24	25.9	女方因素	2	6.29	494	0.36	1	8.62	4.49	50.1	4	4	9.3	A-B	IVF	1	0	1	1	0	0	0	否	否	全胚冷冻
599	1	2017050135	郭淑蕾	≥35	47	1	降调节方案	3	325	≤10天	10	＞3000	3250	HCG	2	1	1	继发不孕	1.11	＞24	31.2	男方因素	6	6.91	1519	0.84	4	10.45	4.5	55.42	4	6	14.7	B	ICSI	3	0	2	1	2	2	0	否	是	移植	未妊娠
1240	0	C00019145	王小娟	≥35	41	1	拮抗剂方案	2	282.692	＞10天	13	＞3000	3675	HCG	3	1	0	继发不孕	1.28	≤24	20.8	女方因素	3	2.37	934.88	0.71	3	8.02	4.5	46.65	2	8	10.4	A	IVF	1	0	0	0	0	0	0	是		无可移植胚胎
2043	1	C00017983	刘丹丹	≥35	35	1	刺激方案	1	300	≤10天	4	≤3000	1200	双扳机	5	0	0	原发不孕	0.94	≤24	20.7	女方因素	1	20.85	361	0.52		5.26	4.5	31.76	4	6	9.2	A		0	0	0	0	0	0	0	是		未取卵
224	0	2017110003	田媛	＜35	30	1	降调节方案	3	181.25	＞10天	12	≤3000	2175	HCG	2	0	0	原发不孕	2.08	≤24	23.3	不明原因	8	3.85	1556	1	7	7.98	4.51	24	1	20	9.5	A	IVF	2	0	1	0	1	1	0	否	是	移植	已妊娠	临床妊娠	宫内妊娠	单胎宫内妊娠
546	1	2016120206	周长荣	≥35	37	1	刺激方案	1	337.5	＞10天	16	＞3000	5400	HCG	4	0	0	原发不孕	2.27	＞24	24.7	女方因素	6	4.28	1985	1.41	7	10.37	4.51	50.6	2	11	14.5	B	IVF	4	0	2	0	0	0	0	否	否	全胚冷冻
748	0	C00012980	铉磊	＜35	23	1	刺激方案	1	225	≤10天	8	≤3000	1800	HCG	2	0	0	继发不孕	1.68	≤24	23.4	男方因素	5	0.56	1405	0.36	3	7.03	4.51	45	1	11	0.83	A	ICSI	2	0	1	1	1	1	0	否	是	移植	未妊娠
1263	0	2017050067	艾春丽	≥35	40	3	拮抗剂方案	2	250	≤10天	5	≤3000	1250	HCG	3	3	2	继发不孕	0.6	＞24	24.4	混合因素	3	5.03	884	0.29	2	11.23	4.51	42	4	4	9.3	A	ICSI	2	0	2	1	2	2	0	否	是	移植	已妊娠	临床妊娠	宫内妊娠	单胚胎停
1613	0	C00010368	李永菊	≥35	47	2	刺激方案	1	266.667	≤10天	6	≤3000	1600	HCG	3	5	1	继发不孕	0.64	＞24	24.5	女方因素	2	4.51	979	0.37	2	18.67	4.51	97.9	4	3	8.5	A-B	IVF	1	0	1	0	0	0	0	否	否	全胚冷冻
1935	1	C00011174	李永菊	≥35	47	3	刺激方案	1	368.75	≤10天	8	≤3000	2950	HCG	9	5	1	继发不孕	0.59	＞24	24.5	女方因素	2	6.36	433	0.67	2	18.67	4.51	97.9	4	3	9.4	A	IVF	1	0	0	0	0	0	0	是		无可移植胚胎
2057	1	C00012100	李永菊	≥35	48	5	拮抗剂方案	2	432.5	≤10天	10	＞3000	4325	HCG	10	5	1	继发不孕	0.06	＞24	24.5	混合因素	1	9.92	621	0.32	1	18.67	4.51	97.9	4	3	1.34	A	ICSI	1	0	1	0	1	1	0	否	是	移植	未妊娠
2090	1	C00011736	李永菊	≥35	48	4	刺激方案	1	360	≤10天	10	＞3000	3600	HCG	10	5	1	继发不孕	0.55	＞24	24.5	女方因素	1	9.24	494	0.26	1	18.67	4.51	97.9	4	3	0.74	B	IVF	1	0	1	0	0	0	0	否	否	全胚冷冻
148	1	2016060026	王静	≥35	37	1	降调节方案	3	345	＞10天	15	＞3000	5175	HCG	1	6	1	继发不孕	1.87	≤24	21.3	女方因素	8	0.35	2008	0.7	4	6.16	4.52	47.71	2	12	10.5	A-B	IVF	3	0	2	0	2	2	0	否	是	移植	已妊娠	临床妊娠	宫内妊娠	单胎宫内妊娠
1225	0	C00016748	于萍	＜35	34	1	降调节方案	3	283.333	≤10天	9	≤3000	2550	HCG	1	0	0	原发不孕	2.4	＞24	24.6	女方因素	3	3.95	974	0.85	3	11.9	4.52	44	1	12	13.9	A	IVF	2	0	2	0	0	0	0	否	否	全胚冷冻
1333	1	C00017426	李双双	＜35	31	1	降调节方案	3	300	＞10天	13	＞3000	3900	HCG	6	0	0	原发不孕	0.87	≤24	21.6	女方因素	3	1.6	647.05	0.9	3	6.61	4.52	30	3	5	12.5	A	IVF	1	0	1	1	0	0	0	否	否	全胚冷冻
1515	0	C00017891	高世芹	≥35	41	4	刺激方案	1	168.75	≤10天	8	≤3000	1350	HCG	4	1	0	继发不孕	0.29	≤24	21	混合因素	3	8.64	862.71	1.59	3	11.9	4.52	44	4	6	0.65	A	ICSI	3	0	2	0	0	0	0	否	否	全胚冷冻
309	1	C00018947	李保丽	≥35	43	2	降调节方案	3	311.111	≤10天	9	≤3000	2800	HCG	3	3	1	继发不孕	1.87	≤24	22.9	女方因素	7	1.92	2292.72	0.98	7	5.98	4.53	48	2	12	12.8	B	IVF	2	0	2	0	0	0	0	否	否	全胚冷冻
233	0	2016060160	孟丽丽	＜35	31	2	降调节方案	3	268.182	＞10天	11	≤3000	2950	HCG	6	0	0	原发不孕	2.3	＞24	24.8	混合因素	5	0.84	1583	0.71	7	8.16	4.54	91.75	1	12	12.6	A-B	ICSI	7	0	5	2	0	0	0	否	否	全胚冷冻
307	1	C00011954	薛爱华	≥35	48	3	刺激方案	1	300	≤10天	8	≤3000	2400	HCG	3	2	1	继发不孕	0.33	＞24	25	女方因素	7	6.07	2379	0.6	5	10.12	4.54	17	4	8	0.52	A	IVF	4	0	2	1	0	0	0	否	否	全胚冷冻
314	1	C00009015	薛爱华	≥35	47	1	刺激方案	1	300	≤10天	9	≤3000	2700	HCG	3	2	1	继发不孕	0.74	＞24	25	女方因素	7	6.79	2231	0.56	7	10.12	4.54	17	4	8	0.57	A	IVF	3	0	2	0	0	0	0	否	否	全胚冷冻
366	0	C00004286	徐传凤	＜35	31	1	降调节方案	3	183.333	≤10天	9	≤3000	1650	HCG	6	0	0	原发不孕	1.55	≤24	20.8	男方因素	7	1.59	1765	1.62	5	5.86	4.54	44	1	17	0.95	A	ICSI	4	0	1	0	1	1	0	否	是	移植	未妊娠
754	0	C00014714	靳红霞	＜35	32	2	降调节方案	3	272.727	＞10天	11	≤3000	3000	HCG	1	3	1	继发不孕	4.27	＞24	27.2	混合因素	5	6.5	1369	1.1	6	11.67	4.54	32	1	16	10.2	A	ICSI	1	0	0	0	0	0	0	是		无可移植胚胎
821	1	C00018907	殷汝芳	≥35	40	1	刺激方案	1	450	＞10天	11	＞3000	4950	HCG	13	0	0	原发不孕	0.61	≤24	19.8	女方因素	5	10.25	1493.4	1.33	2	11.17	4.54	38.84	4	6	5.6	A	IVF	0	0	0	0	0	0	0	是		无可移植胚胎
1207	1	C00010238	徐艳	≥35	47	2	刺激方案	1	292.5	≤10天	10	≤3000	2925	双扳机	2	4	0	继发不孕	0.32	≤24	24	女方因素	4	0.86	1013	0.64	4	9.86	4.54	44	4	8	5.8	A	IVF	2	0	2	1	0	0	0	否	否	全胚冷冻
1459	0	C00011251	薛爱华	≥35	48	2	刺激方案	1	225	≤10天	9	≤3000	2025	HCG	3	2	1	继发不孕	0.3	＞24	25	女方因素	3	1.68	968	1.14	3	10.12	4.54	17	4	8	0.8	A-B	IVF	0	0	2	0	0	0	0	否	否	全胚冷冻
1665	1	C00012691	薛爱华	≥35	48	4	刺激方案	1	300	≤10天	7	≤3000	2100	HCG	3	2	1	继发不孕	2.82	＞24	25	女方因素	2	6.61	834	0.37	1	10.12	4.54	17	2	8	0.86	A	IVF	1	0	0	0	0	0	0	是		无可移植胚胎
2209	1	2017110181	张雅林	≥35	39	3	降调节方案	3	352.5	≤10天	10	＞3000	3525	HCG	2	2	1	继发不孕	0.62	＞24	31.2	男方因素	1	9.23	243	0.73	1	16.85	4.54	87.92	4	4	10.5	B	ICSI	1	0	1	0	1	1	0	否	是	移植	未妊娠
582	0	2016040127	李晓燕	＜35	34	1	刺激方案	1	150	≤10天	7	≤3000	1050	HCG	6	1	0	继发不孕	1.81	≤24	17.7	不明原因	6	1.61	1626	0.92	6	6.48	4.55	30.1	1	11	9.7	A	IVF	3	0	2	0	2	2	0	否	是	移植	未妊娠
594	0	2018030162	张莉	≥35	35	4	降调节方案	3	277.5	≤10天	10	≤3000	2775	HCG	11	0	0	原发不孕	1.62	≤24	21.6	不明原因	6	1.34	1548	3.12	6	5.15	4.55	59.09	2	8	13.1	A	IVF	6	0	4	2	0	0	0	否	否	全胚冷冻
1199	0	2016090215	张莉	＜35	33	1	刺激方案	1	266.667	≤10天	9	≤3000	2400	HCG	11	0	0	原发不孕	2.63	≤24	21.6	女方因素	4	5.26	1055	2.5	6	5.15	4.55	59.09	1	8	11.2	A	IVF	2	0	2	0	0	0	0	否	否	全胚冷冻
1302	0	2017020077	张莉	＜35	34	2	刺激方案	1	262.5	≤10天	8	≤3000	2100	HCG	11	0	0	原发不孕	1.91	≤24	21.6	女方因素	3	1.06	773	0.66	2	5.15	4.55	59.09	1	8	11	A	IVF	1	0	1	0	1	1	0	否	是	移植	未妊娠
1456	0	2017060262	张莉	＜35	34	3	刺激方案	1	225	≤10天	9	≤3000	2025	HCG	11	0	0	原发不孕	2.63	≤24	21.6	女方因素	3	6.99	888	3.71	3	5.15	4.55	59.09	1	8	7.7	A-B	IVF	2	0	1	0	0	0	0	否	否	全胚冷冻
1537	1	2017090211	姜金玲	≥35	42	1	拮抗剂方案	2	300	≤10天	7	≤3000	2100	HCG	1	2	1	继发不孕	0.92	≤24	20.3	男方因素	3	5.87	1189	0.52	2	9.59	4.55	52.32	4	6	11.8	A	ICSI	2	1	1	0	0	0	0	否	否	全胚冷冻
1755	1	2016060111	史希焕	＜35	25	4	刺激方案	1	337.5	≤10天	10	＞3000	3375	HCG	3	3	0	继发不孕	0.11	＞24	24.4	女方因素	2	2.6	622	0.63	2	12.67	4.55	45.67	3	4	11	A	IVF	0	0	0	0	0	0	0	是		未受精
2136	1	C00012867	张艳明	≥35	47	4	刺激方案	1	322.5	≤10天	10	＞3000	3225	HCG	2	6	1	继发不孕	0.14	＞24	27.2	混合因素	1	8.96	396	0.58	1	16.25	4.55	24	4	3	6.9	A-B	ICSI	1	0	1	1	0	0	0	否	否	全胚冷冻
2205	0	2016010053	吴绪连	≥35	48	1	降调节方案	3	112.5	≤10天	6	≤3000	675	HCG	1	1	1	继发不孕	0.19	≤24	20.8	混合因素	1	19.25	251	1.29		13.43	4.55	67	4	4	5.8	A		0	0	0	0	0	0	0	是		未取卵
430	1	2016030123	张奉	＜35	32	1	降调节方案	3	337.5	≤10天	8	≤3000	2700	HCG	4	1	0	继发不孕	2.72	＞24	33.3	女方因素	6	1.44	909	0.44	7	10.18	4.56	46	1	12	11.9	A	IVF	0	0	0	0	0	0	0	否	否	全胚冷冻
501	1	C00008718	张君	≥35	38	1	拮抗剂方案	2	300	＞10天	12	＞3000	3600	双扳机	2	3	1	继发不孕	2.66	≤24	22.1	女方因素	6	1.56	2476	1.88	5	8.91	4.56	24.76	2	9	10.6	A	IVF	4	0	4	3	0	0	0	否	否	全胚冷冻
605	1	2017030282	彭华	≥35	39	3	刺激方案	1	320.455	＞10天	11	＞3000	3525	HCG	1	4	1	继发不孕	1.77	≤24	21.2	混合因素	6	1.72	1464	0.78	4	8.66	4.56	55	2	12	9	A	ICSI	3	0	2	0	2	2	0	否	是	移植	已妊娠	临床妊娠	宫内妊娠	单胎宫内妊娠
654	1	2016050149	李亚霜	≥35	43	4	刺激方案	1	412.5	＞10天	12	＞3000	4950	HCG	5	4	1	继发不孕	0.39	≤24	22	女方因素	5	1.33	718	0.62	2	16.3	4.56	69.63	4	4	13.7	B	IVF	1	0	1	0	0	0	0	否	否	全胚冷冻
1504	1	2016120144	于艳	≥35	36	2	降调节方案	3	312.5	≤10天	8	≤3000	2500	HCG	2	4	1	继发不孕	0.75	≤24	21.7	混合因素	3	1.92	948	1.49	4	5.57	4.56	84.41	4	6	13.4	B	ICSI	2	0	1	0	1	1	0	否	是	移植	未妊娠
1858	1	2016110213	李亚霜	≥35	47	6	刺激方案	1	428.571	＞10天	14	＞3000	6000	HCG	5	4	1	继发不孕	0.07	≤24	22	混合因素	2	23.34	383	3.93		16.3	4.56	69.63	4	2	11.6	B		0	0	0	0	0	0	0	是		未取卵
407	1	C00009307	柏海云	≥35	41	1	降调节方案	3	321.154	＞10天	13	＞3000	4175	HCG	6	0	0	原发不孕	1.86	＞24	28.7	女方因素	7	2.13	1270	1.02	5	7.82	4.57	19	2	12	1.26	A	IVF	2	0	2	1	2	2	0	否	是	移植	未妊娠
1661	0	C00018198	徐淑玲	≥35	44	1	刺激方案	1	150	≤10天	8	≤3000	1200	HCG	1	3	3	继发不孕	1.090	＞24	24.2	男方因素	2	13.51	840.48	1.34	3	12.12	4.57	85	4	5	6.6	B	ICSI	2	0	2	1	0	0	0	否	否	全胚冷冻
1890	0	C00019471	徐淑玲	≥35	45	2	拮抗剂方案	2	225	≤10天	8	≤3000	1800	HCG	1	4	3	继发不孕	0.33	＞24	26	女方因素	2	3.85	409.3	0.65	1	12.12	4.57	85	4	5	10.4	A	IVF	0	0	0	0	0	0	0	是		无可移植胚胎
1921	1	C00016030	任俊杰	≥35	36	1	拮抗剂方案	2	325	≤10天	10	＞3000	3250	HCG	1	3	0	继发不孕	2.31	≤24	22.3	女方因素	2	3.95	477	0.89	3	9.27	4.57	33	2	7	6.2	C	IVF	1	0	1	1	0	0	0	否	否	全胚冷冻
463	1	C00015966	李娟	≥35	36	1	降调节方案	3	343.75	＞10天	12	＞3000	4125	HCG	3	1	0	继发不孕	1.26	≤24	22.3	女方因素	6	1.89	1648	1.38	7	6.89	4.58	59	2	14	10.5	C	IVF	6	0	4	1	2	2	0	否	是	移植	未妊娠
982	1	C00011933	李新文	＜35	30	2	刺激方案	1	300	≤10天	8	≤3000	2400	HCG	3	0	0	原发不孕	2.46	≤24	21.8	混合因素	4	20.45	1344	2.16	3	11.62	4.58	71	1	8	0.75	B	ICSI	3	0	2	0	0	0	0	否	否	全胚冷冻
1581	1	C00011155	刘静静	＜35	28	2	拮抗剂方案	2	325	≤10天	9	≤3000	2925	HCG	6	0	0	原发不孕	1.49	≤24	20.7	女方因素	3	3.04	1044	0.92	2	14.93	4.58	52	1	8	13.3	A	IVF	1	0	0	0	0	0	0	是		无可移植胚胎
1593	1	C00010110	刘静静	＜35	28	1	拮抗剂方案	2	295	＞10天	15	＞3000	4425	双扳机	6	0	0	原发不孕	2.32	≤24	20.7	女方因素	3	6.2	1013	0.51	2	14.93	4.58	52	1	8	14.5	A	IVF	1	0	0	0	0	0	0	是		无可移植胚胎
1597	1	C00018677	李新文	＜35	32	7	刺激方案	1	450	≤10天	8	＞3000	3600	HCG	3	0	0	原发不孕	2.1	≤24	21.8	混合因素	3	3.63	918	1.27	3	11.62	4.58	71	1	9	6.3	B	ICSI	1	0	1	1	0	0	0	否	否	全胚冷冻
1952	1	C00016091	李新文	＜35	31	4	刺激方案	1	400	≤10天	9	＞3000	3600	HCG	3	0	0	原发不孕	1.0	≤24	21.8	混合因素	2	35.21	503.17	1.71	0	11.62	4.58	71	3	3	0.82	A-B		0	0	0	0	0	0	0	是		未取到卵
2235	0	C00011051	李新文	＜35	30	1	刺激方案	1	150	≤10天	7	≤3000	1050	HCG	3	0	0	原发不孕	0.63	≤24	21.8	女方因素	1	19.49	359	1.48	2	11.62	4.58	71	3	6	0.89	B	IVF	0	0	0	0	0	0	0	是		未受精
609	0	C00014510	裴晓	＜35	33	1	拮抗剂方案	2	212.5	≤10天	8	≤3000	1700	HCG	1	5	0	继发不孕	1.97	＞24	28.7	女方因素	6	4.22	1438	0.68	5	8.3	4.59	26.29	1	9	0.74	A-B	IVF	4	0	4	1	2	2	0	否	是	移植	未妊娠
937	0	C00005602	孟颜	≥35	37	1	刺激方案	1	150	≤10天	5	≤3000	750	双扳机	2	4	1	继发不孕	1.12	＞24	28	女方因素	4	9.18	823	1.64	4	11.82	4.59	17.33	4	6	8.4	B	IVF	2	0	2	0	0	0	0	否	否	全胚冷冻
1204	1	C00016741	裴晓	＜35	34	2	刺激方案	1	300	≤10天	7	≤3000	2100	HCG	1	5	0	继发不孕	2.88	＞24	28.7	女方因素	4	6.3	1032	0.6	2	8.3	4.59	26.29	1	9	0.48	A	IVF	2	0	2	2	0	0	0	否	否	全胚冷冻
1931	0	2017090284	王海芳	≥35	46	3	刺激方案	1	180	≤10天	10	≤3000	1800	HCG	1	0	0	继发不孕	0.15	＞24	26.4	男方因素	2	2.47	444.65	0.56	3	13.33	4.59	79.69	4	7	8.8	B	ICSI	3	0	1	0	1	1	0	否	是	移植	未妊娠
1968	0	C00006893	孟颜	≥35	37	2	刺激方案	1	212.5	≤10天	6	≤3000	1275	双扳机	2	4	1	继发不孕	0.29	＞24	28	女方因素	2	6.48	464	0.55	3	11.82	4.59	17.33	4	5	15.8	B	IVF	3	0	2	1	0	0	0	否	否	全胚冷冻
2173	0	2017120019	王海芳	≥35	46	4	刺激方案	1	150	≤10天	10	≤3000	1500	HCG	1	0	0	继发不孕	0.34	＞24	26.4	女方因素	1	2.27	316	0.37	1	13.33	4.59	79.69	4	7	8.6	B	IVF	1	0	1	0	0	0	0	否	否	全胚冷冻
368	1	C00015089	李小会	≥35	35	2	刺激方案	1	443.182	＞10天	11	＞3000	4875	HCG	6	1	0	继发不孕	1.29	＞24	24.9	女方因素	7	3.21	1728	0.75	4	11.84	4.6	55	2	11	1.16	A	IVF	2	0	0	0	0	0	0	是		无可移植胚胎
369	1	2017110283	张静丽	＜35	24	2	降调节方案	3	318.75	＞10天	12	＞3000	3825	HCG	2	2	1	继发不孕	3.80	＞24	25.7	不明原因	7	1.71	1724	1.37	9	4.3	4.6	37.84	1	17	10.1	B	IVF	7	0	3	1	2	2	0	否	是	移植	未妊娠
611	0	C00003462	王微微	≥35	36	1	降调节方案	3	275	＞10天	18	＞3000	4950	HCG	3	2	2	继发不孕	1.93	＞24	26.4	女方因素	6	2.6	1362	0.67	6	5.21	4.6	23.67	2	14	1.5	A-B	IVF	4	0	2	0	0	0	0	否	否	全胚冷冻
983	1	C00012746	李小会	≥35	35	1	刺激方案	1	337.5	≤10天	10	＞3000	3375	HCG	6	1	0	继发不孕	2.93	＞24	24.9	女方因素	4	3.17	1343	0.72	3	11.84	4.6	55	2	9			IVF	1	0	0	0	0	0	0	是		无可移植胚胎
1186	0	2016040047	屈世宏	≥35	37	1	降调节方案	3	219.231	＞10天	13	≤3000	2850	HCG	2	1	0	继发不孕	1.93	≤24	19.8	女方因素	4	1.64	1120	0.99	4	10.09	4.6	59.09	2	6	11	A	IVF	3	0	2	1	2	2	0	否	是	移植	已妊娠	临床妊娠	宫内妊娠	单胎宫内妊娠
1531	1	2017040092	李现敬	≥35	35	1	降调节方案	3	300	＞10天	11	＞3000	3300	HCG	6	4	1	继发不孕	1.29	＞24	25	女方因素	3	2.92	1233	1.12	4	6.3	4.6	50.46	2	9	13.6	A-B	IVF	3	0	2	1	2	2	0	否	是	移植	已妊娠	临床妊娠	宫内妊娠	双胎宫内妊娠
58	0	2018050160	裴俊荣	≥35	39	1	降调节方案	3	285	≤10天	10	≤3000	2850	HCG	1	2	2	继发不孕	1.41	≤24	20.4	女方因素	9	0.56	2800	1.98	7	10.5	4.61	65.76	2	11	12	A-B	IVF	5	0	4	0	0	0	0	否	否	全胚冷冻
428	1	C00015165	孟丽丽	≥35	37	1	刺激方案	1	300	＞10天	12	＞3000	3600	HCG	6	0	0	原发不孕	1.62	≤24	22.7	混合因素	6	5.75	945	2.46	2	13.01	4.61	41	2	10	1.09	A		0	0	0	0	0	0	0	是		未行授精
850	0	2018050113	薛芸	＜35	25	1	降调节方案	3	217.5	≤10天	10	≤3000	2175	HCG	3	0	0	原发不孕	1.61	≤24	22	女方因素	5	0.83	1302	0.96	6	6.15	4.61	39.09	1	10	11.5	A-B	IVF	4	0	1	0	0	0	0	否	否	全胚冷冻
990	1	2016110017	李翠香	≥35	46	3	降调节方案	3	600	≤10天	10	＞3000	6000	HCG	1	4	1	继发不孕	0.806	≤24	23.4	男方因素	4	5.5	1317	0.84	3	9.68	4.61	29	4	3	6.3	B	ICSI	1	0	0	0	0	0	0	是		无可移植胚胎
1132	1	2016080011	李翠香	≥35	46	1	拮抗剂方案	2	393.75	≤10天	8	＞3000	3150	HCG	1	4	1	继发不孕	0.27	≤24	23.4	混合因素	4	2.85	1339	0.8	3	9.68	4.61	29	4	3	5.9	A-B	ICSI	1	0	0	0	0	0	0	是		无可移植胚胎
1226	1	2014110127	李芳	＜35	28	1	降调节方案	3	375	≤10天	7	≤3000	2625	HCG	8	0	0	原发不孕	0.56	≤24	19.2	不明原因	3	5.43	974	2.33	1	15.04	4.61	67.45	3	4	16.2		IVF	0	0	0	0	0	0	0	是		未受精
1306	1	2016060025	王丽颖	≥35	40	3	降调节方案	3	330.882	＞10天	17	＞3000	5625	HCG	8	2	0	继发不孕	1.47	≤24	22	女方因素	3	0.87	754	0.73	3	8.3	4.61	35.42	2	7	10	A-B	IVF	3	0	0	0	0	0	0	是		无可移植胚胎
1484	1	C00012480	张克彩	≥35	38	2	刺激方案	1	300	≤10天	7	≤3000	2100	HCG	1	2	1	继发不孕	1.3	＞24	28.8	女方因素	3	9.14	844.63	0.66	5	6.01	4.61	41	2	9	0.57	A-B	IVF	2	0	0	0	0	0	0	是		无可移植胚胎
1517	1	2016020136	万连艳	≥35	40	1	刺激方案	1	347.727	＞10天	11	＞3000	3825	HCG	18	0	0	原发不孕	1.85	＞24	25.6	女方因素	3	4.44	854.39	1.48	6	10.57	4.61	15	2	10	13.3	A	IVF	4	0	2	0	2	2	0	否	是	移植	未妊娠
1723	1	2016050004	王丽颖	≥35	36	2	刺激方案	1	343.75	＞10天	12	＞3000	4125	HCG	8	2	0	继发不孕	1.47	≤24	22	女方因素	2	2.95	706	0.78	2	8.3	4.61	35.42	2	7	8.3	A	IVF	0	0	0	0	0	0	0	是		未受精
2010	1	2016090261	李翠香	≥35	46	2	降调节方案	3	421.053	＞10天	19	＞3000	8000	HCG	1	4	1	继发不孕	0.7	≤24	23.4	男方因素	1	6.47	920	0.92	1	9.68	4.61	29	4	3	5.6	A-B	ICSI	2	0	2	0	0	0	0	否	否	全胚冷冻
146	1	C00013119	郭晓蝶	＜35	30	1	降调节方案	3	611.682	＞10天	11	＞3000	6728.5	HCG	3	0	0	原发不孕	3.05	≤24	19.6	男方因素	8	1.76	2168	0.5	8	5.87	4.62	32.4	1	16	12.5	A	ICSI	5	0	4	1	2	2	0	否	是	移植	已妊娠	临床妊娠	宫内妊娠	单胎宫内妊娠
413	0	C00007851	谭宁	≥35	41	1	刺激方案	1	180	≤10天	10	≤3000	1800	HCG	6	1	0	继发不孕	0.33	＞24	27.2	女方因素	7	6.35	1186	0.39	2	11.65	4.62	68	4	5	0.9	B	IVF	0	1	1	0	0	0	0	否	否	全胚冷冻
633	0	C00005672	徐瑞华	≥35	37	1	拮抗剂方案	2	272.727	＞10天	11	≤3000	3000	双扳机	12	0	0	原发不孕	2.48	≤24	21.4	女方因素	6	2.08	1041	0.71	5	12.09	4.62	55	2	8	12.1	A	IVF	0	0	0	0	0	0	0	是		无可移植胚胎
1338	1	C00011040	谭宁	≥35	42	3	降调节方案	3	360	≤10天	10	＞3000	3600	HCG	6	1	0	继发不孕	0.940	＞24	27.2	不明原因	3	1.44	636	0.46	3	11.65	4.62	68	4	5	12.2	B	IVF	1	0	2	0	2	2	0	否	是	移植	未妊娠
1654	1	C00012274	谭宁	≥35	42	4	降调节方案	3	301.923	＞10天	13	＞3000	3925	HCG	6	1	0	继发不孕	0.45	＞24	27.2	不明原因	2	6.67	853	0.42	2	11.65	4.62	68	4	5	14.5	A-B	IVF	2	0	2	0	0	0	0	否	否	全胚冷冻
1659	1	C00012631	徐瑞华	≥35	38	3	刺激方案	1	300	≤10天	8	≤3000	2400	HCG	13	0	0	原发不孕	1.03	≤24	21.4	混合因素	2	7.79	845	0.23	1	12.09	4.62	55	4	5	1.3	A	ICSI	1	0	1	0	1	1	0	否	是	移植	已妊娠	临床妊娠	宫内妊娠	单胎宫内妊娠
1662	1	C00015383	谭宁	≥35	42	5	刺激方案	1	321.429	≤10天	7	≤3000	2250	HCG	6	1	0	继发不孕	0.33	＞24	27.2	女方因素	2	5.31	839	0.54	2	11.65	4.62	68	4	5	9.2	B	IVF	2	0	1	0	0	0	0	否	否	全胚冷冻
1820	1	C00009893	谭宁	≥35	41	2	拮抗剂方案	2	392.045	＞10天	11	＞3000	4312.5	HCG	6	1	0	继发不孕	1.01	＞24	27.2	女方因素	2	4.91	510	0.29	0	11.65	4.62	68	4	5	11.8	B		0	0	0	0	0	0	0	是		未取到卵
31	0	2017060097	王加花	≥35	38	1	降调节方案	3	252.5	≤10天	10	≤3000	2525	HCG	3	2	1	继发不孕	1.49	≤24	23.3	女方因素	9	2.28	1672	1.42	4	7.02	4.63	100.56	2	10	16.5	B	IVF	3	0	0	0	0	0	0	是		无可移植胚胎
132	1	C00014959	赵艳	≥35	35	1	拮抗剂方案	2	382.143	≤10天	7	≤3000	2675	双扳机	1	4	1	继发不孕	1.57	≤24	21.2	女方因素	8	2.09	2757	1.19	9	4.77	4.63	32	2	15	13	A-B	IVF	7	2	2	0	0	0	0	否	否	全胚冷冻
143	0	2018060006	姜迎新	＜35	28	3	降调节方案	3	122.727	＞10天	11	≤3000	1350	HCG	1	2	0	继发不孕	2.94	≤24	19.7	女方因素	8	19.94	2233	0.99	6	5.12	4.63	34.56	1	14	8.3	A	IVF	0	0	0	0	0	0	0	是		无可移植胚胎
405	1	C00014728	吴慧慧	≥35	35	8	拮抗剂方案	2	300	＞10天	11	＞3000	3300	HCG	7	0	0	原发不孕	1.45	＞24	27.3	男方因素	7	6.39	1277	0.58	3	6.57	4.63	31	2	11	6.3	B-C	ICSI	3	0	0	0	0	0	0	是		无可移植胚胎
724	1	C00017518	王海莉	≥35	39	1	拮抗剂方案	2	366.346	＞10天	13	＞3000	4762.5	HCG	1	1	1	继发不孕	1.50	≤24	21.5	女方因素	5	0.87	1553	2.03	5	7.87	4.63	79	2	9	12.2	B	IVF	2	3	4	0	0	0	0	否	否	全胚冷冻
1642	0	C00004255	杨宝凤	≥35	45	1	刺激方案	1	254.167	≤10天	9	≤3000	2287.5	HCG	3	2	1	继发不孕	0.52	≤24	23.6	女方因素	2	5.77	888	0.61	1	15.94	4.63	29	4	3	10.1	B	IVF	0	0	0	0	0	0	0	是		无可移植胚胎
1876	1	C00004775	杨宝凤	≥35	45	2	拮抗剂方案	2	300	≤10天	10	≤3000	3000	双扳机	3	2	1	继发不孕	0.23	≤24	23.6	混合因素	2	25.07	318	0.69		15.94	4.63	29	4	3	11.4	A-B		0	0	0	0	0	0	0	是		未取卵
1137	1	C00017201	禇延苓	≥35	41	4	刺激方案	1	450	≤10天	10	＞3000	4500	HCG	1	4	0	继发不孕	0.29	≤24	22.9	女方因素	4	17.24	1317	1.06	0	12.58	4.64	13	4	6	6	A		0	0	0	0	0	0	0	是		未取到卵
1368	1	C00012242	禇延苓	≥35	40	3	刺激方案	1	300	＞10天	11	＞3000	3300	HCG	1	4	0	继发不孕	1.13	≤24	22.9	女方因素	3	0.32	509	1.26	2	12.58	4.64	13	4	6	0.88	B	IVF	2	0	0	0	0	0	0	是		无可移植胚胎
1633	0	C00006782	高洁	≥35	38	3	刺激方案	1	218.182	＞10天	11	≤3000	2400	HCG	3	2	0	继发不孕	1.18	＞24	25.8	女方因素	2	10.98	902	0.53	1	17.56	4.64	24	4	6	4.3	B	IVF	1	0	0	0	0	0	0	是		无可移植胚胎
1724	1	C00012062	高洁	≥35	39	6	拮抗剂方案	2	415.909	＞10天	11	＞3000	4575	HCG	5	2	0	继发不孕	0.45	＞24	25.8	女方因素	2	1.79	704	0.32	3	17.56	4.64	24	4	6	8.1	A	IVF	3	0	1	0	0	0	0	否	否	全胚冷冻
1804	0	C00016582	张芬	≥35	42	4	拮抗剂方案	2	163.636	＞10天	11	≤3000	1800	HCG	6	3	1	继发不孕	1.01	＞24	26.7	女方因素	2	3.41	534	0.54	2	10.98	4.64	32	4	6	10.5	A-B	IVF	2	0	2	0	0	0	0	否	否	全胚冷冻
1914	1	2018040093	高洁	≥35	37	1	刺激方案	1	371.053	＞10天	19	＞3000	7050	双扳机	3	2	0	继发不孕	1.49	＞24	25.8	女方因素	4	1.15	794	1.33	5	17.56	4.64	24	2	6	6.2	A-B	IVF	5	0	0	0	0	0	0	是		无可移植胚胎
2139	1	C00004583	高洁	≥35	37	2	拮抗剂方案	2	306.25	＞10天	12	＞3000	3675	双扳机	3	2	0	继发不孕	0.5	＞24	25.8	女方因素	1	12.85	388	0.95	0	17.56	4.64	24	4	6	8	A		0	0	0	0	0	0	0	是		未取到卵
2148	1	C00009555	禇延苓	≥35	39	1	刺激方案	1	450	＞10天	11	＞3000	4950	HCG	1	4	0	继发不孕	1.66	≤24	22.9	女方因素	1	9.84	376	2.2	0	12.58	4.64	13	2	6	0.83	A-B		0	0	0	0	0	0	0	是		未取到卵
2155	1	2017050211	姜东艳	≥35	37	1	刺激方案	1	300	≤10天	9	≤3000	2700	HCG	4	0	0	继发不孕	1.3	≤24	20.8	混合因素	1	25.23	357	0.69	1	11.64	4.64	47.4	2	6	14.9	A-B	ICSI	1	0	0	0	0	0	0	是		无可移植胚胎
292	0	2017120074	张海燕	≥35	36	1	降调节方案	3	275	＞10天	11	＞3000	3025	HCG	3	0	0	原发不孕	1.77	≤24	19.5	女方因素	7	0.8	2770	1.57	5	5.86	4.65	49.09	2	10	13.4	A	IVF	1	0	1	0	1	1	0	否	是	移植	已妊娠	临床妊娠	宫内妊娠	单胚胎停
420	1	2016060075	刘小文	＜35	33	1	降调节方案	3	302.5	＞10天	15	＞3000	4537.5	HCG	7	2	0	继发不孕	3.98	≤24	20.6	女方因素	7	0.47	1067	0.58	7	7.91	4.65	41.75	1	19	11.8	A	IVF	4	0	4	3	0	0	0	否	否	全胚冷冻
1940	0	2018070046	张小平	≥35	44	2	刺激方案	1	286.364	＞10天	11	＞3000	3150	HCG	2	3	1	继发不孕	0.221	≤24	20	女方因素	2	3.25	414	1.68	1	18.08	4.65	78.43	4	4	13.7	B	IVF	1	0	1	0	0	0	0	否	否	全胚冷冻
2019	0	2018050052	张小平	≥35	44	1	刺激方案	1	150	≤10天	10	≤3000	1500	HCG	2	3	1	继发不孕	0.32	≤24	20	女方因素	1	11.83	774	1.03	2	18.08	4.65	78.43	4	4	6.2	B	IVF	1	0	1	1	0	0	0	否	否	全胚冷冻
23	1	2016060206	刘伟英	≥35	39	1	降调节方案	3	361.364	＞10天	11	＞3000	3975	HCG	11	2	1	继发不孕	1.74	≤24	22.2	女方因素	8	5.38	2004	0.76	8	8.15	4.66	40	2	11	15	A	IVF	6	0	5	2	2	2	0	否	是	移植	未妊娠
684	1	C00016484	李胜清	≥35	46	1	刺激方案	1	300	＞10天	11	＞3000	3300	HCG	7	3	2	继发不孕	0.84	≤24	23.8	女方因素	5	8.5	1796	2.41	4	14.15	4.66	40	4	9	0.5	A-B	IVF	3	0	2	2	0	0	0	否	否	全胚冷冻
695	0	C00018316	李胜清	≥35	46	2	拮抗剂方案	2	288.462	＞10天	13	＞3000	3750	HCG	7	3	2	继发不孕	0.99	≤24	23.8	女方因素	5	2.39	1734	1.77	3	14.15	4.66	40	4	9	8.9	B	IVF	2	0	2	0	2	2	0	否	是	移植	未妊娠
868	1	C00007558	赵晓彤	＜35	31	1	降调节方案	3	450	≤10天	8	＞3000	3600	HCG	6	0	0	原发不孕	1.29	＞24	33.6	女方因素	5	3.1	1198	0.57	5	5.16	4.66	24	1	11	1.3	B	IVF	1	0	0	0	0	0	0	是		无可移植胚胎
1197	1	2016030179	张春莉	≥35	40	1	刺激方案	1	300	≤10天	7	≤3000	2100	HCG	6	4	1	继发不孕	1.08	＞24	24.3	女方因素	4	2.5	1062	1.2	3	6.46	4.66	34.76	4	7	8.2	A	IVF	3	0	1	0	1	1	0	否	是	移植	已妊娠	临床妊娠	宫内妊娠	单胎宫内妊娠
1209	1	C00010247	巩向莉	＜35	32	1	降调节方案	3	371.591	＞10天	22	＞3000	8175	HCG	2	4	1	继发不孕	1.76	＞24	34.6	女方因素	4	0.63	1003	0.33	4	7.26	4.66	18	1	7	15.2	B	IVF	4	0	2	1	2	2	0	否	是	移植	未妊娠
1420	1	2016060207	姜丽	≥35	35	1	降调节方案	3	392.857	≤10天	7	≤3000	2750	HCG	5	5	1	继发不孕	1.43	≤24	22.8	女方因素	3	10.36	981	0.87	3	6.15	4.66	40	2	8	8.8	A	IVF	2	0	2	0	2	2	0	否	是	移植	未妊娠
1574	0	C00012039	赵晓彤	＜35	31	2	刺激方案	1	233.333	≤10天	9	≤3000	2100	HCG	6	0	0	原发不孕	2.3	＞24	33.6	男方因素	3	3.95	1070	0.43	1	5.16	4.66	24	1	11	1.13	B	ICSI	1	0	1	1	0	0	0	否	否	全胚冷冻
19	0	2016040273	张清	＜35	28	1	降调节方案	3	160	＞10天	15	≤3000	2400	HCG	4	1	0	继发不孕	5.60	＞24	32	女方因素	10	1.25	2140	1.12	5	6.25	4.67	59.09	1	72	0.81	B	IVF	1	0	1	0	1	1	0	否	是	移植	未妊娠
231	0	2016120118	肖叶	＜35	34	1	降调节方案	3	238.462	＞10天	13	＞3000	3100	HCG	3	1	0	继发不孕	1.33	≤24	18.5	女方因素	8	0.93	1354	0.56	9	7.43	4.67	73.4	1	11	14.7	A-B	IVF	6	0	3	1	0	0	0	否	否	全胚冷冻
451	0	2017010115	JANG SANGYOON	＜35	30	2	降调节方案	3	272.727	＞10天	11	≤3000	3000	HCG	1	0	0	原发不孕	1.26	≤24	20.4	男方因素	6	2.03	1791	0.72	9	5.64	4.67	86.43	1	10	13.3	A-B	ICSI	3	0	3	0	0	0	0	否	否	全胚冷冻
691	0	C00003388	张金凤	≥35	41	1	拮抗剂方案	2	177.273	＞10天	11	≤3000	1950	HCG	3	3	1	继发不孕	1.5	＞24	25.6	女方因素	5	1.05	1760	0.94	6	6.81	4.67	79	2	10	6.3	A-B	IVF	5	0	0	0	0	0	0	是		无可移植胚胎
1010	1	2016090108	宋宗玲	≥35	43	1	降调节方案	3	309.375	≤10天	8	≤3000	2475	HCG	1	2	0	继发不孕	0.21	≤24	23.3	混合因素	4	6.94	1232.93	1.37	4	17.42	4.67	66.6	4	5	9.5	B	ICSI	2	0	1	0	0	0	0	否	否	全胚冷冻
1122	1	2016090248	张杰	≥35	41	1	降调节方案	3	380	＞10天	15	＞3000	5700	HCG	1	0	0	继发不孕	2.4	≤24	21.8	女方因素	4	1.12	1369	0.65	7	8.12	4.67	36.43	2	10	10.9	A	IVF	3	0	3	3	2	2	0	否	是	移植	已妊娠	临床妊娠	宫内妊娠	单胎宫内妊娠
1249	1	2017030146	吕红丽	＜35	33	1	刺激方案	1	300	≤10天	9	≤3000	2700	HCG	5	4	0	继发不孕	1.86	≤24	20.4	女方因素	3	8.9	911	1.49		7.48	4.67	29	1	15	9.5	A		0	0	0	0	0	0	0	是		未取卵
1963	1	2017110224	张园园	＜35	29	1	降调节方案	3	414.167	＞10天	15	＞3000	6212.5	HCG	4	0	0	继发不孕	0.75	＞24	24.7	男方因素	2	0.26	477	0.62	2	5.42	4.67	81.1	3	6	4.5		IVF	2	0	0	0	0	0	0	是		无可移植胚胎
76	0	2016020143	彭春霞	≥35	38	3	降调节方案	3	258.75	≤10天	10	≤3000	2587.5	HCG	4	2	1	原发不孕	2.21	＞24	26.6	女方因素	9	0.51	2344	0.61	7	8.86	4.68	42	2	16	9.4	A	IVF	7	0	4	0	2	2	0	否	是	移植	已妊娠	临床妊娠	宫内妊娠	单胎宫内妊娠
136	0	2016030102	姚双	＜35	23	1	降调节方案	3	240	≤10天	10	≤3000	2400	HCG	1	3	0	继发不孕	2.45	≤24	21	女方因素	8	0.76	1544	1.34	8	5.19	4.68	25.75	1	16	11	A	IVF	4	0	3	1	2	2	0	否	是	移植	未妊娠
519	0	C00016196	肖倩慧	＜35	31	1	降调节方案	3	277.5	≤10天	10	≤3000	2775	HCG	3	0	0	原发不孕	2.02	≤24	17.1	女方因素	6	1.65	2245	3.17	6	6.37	4.68	42	1	11	1.62	A	IVF	4	0	4	3	0	0	0	否	否	全胚冷冻
1001	0	C00016290	孙玉新	＜35	33	1	降调节方案	3	252.273	＞10天	11	≤3000	2775	HCG	5	0	0	原发不孕	2.03	≤24	19.3	女方因素	4	2.04	1274	1.19	6	8.86	4.68	42	1	7	10.2	A	IVF	3	0	1	1	1	1	0	否	是	移植	未妊娠
1360	1	2018050022	徐春红	≥35	43	1	降调节方案	3	375	≤10天	10	＞3000	3750	HCG	1	2	1	继发不孕	0.95	＞24	29.8	女方因素	3	0.4	550	0.54	3	13.7	4.68	66.06	4	7	10.7	B	IVF	1	0	1	0	1	1	0	否	是	移植	未妊娠
1381	0	2017060291	高乃珲	≥35	39	1	降调节方案	3	222.727	＞10天	11	≤3000	2450	HCG	1	0	0	原发不孕	0.45	≤24	20.8	女方因素	3	25.69	329	0.76	1	12.8	4.68	67.09	4	3	6.3	A	IVF	6	0	2	0	0	0	0	否	否	全胚冷冻
174	0	2018010081	韩倩倩	＜35	29	1	降调节方案	3	236.538	＞10天	13	＞3000	3075	HCG	3	0	0	原发不孕	2.91	≤24	17.4	混合因素	8	1.43	2396	1.78	4	6.44	4.69	29.6	1	12	10	A	ICSI	2	0	2	1	2	2	0	否	是	移植	未妊娠
453	1	2017110222	张金玲	≥35	39	1	降调节方案	3	300	＞10天	14	＞3000	4200	HCG	2	2	1	继发不孕	1.46	≤24	21.5	女方因素	6	2.45	1775	1.38	5	10.05	4.69	33.7	2	8	11	B	IVF	3	0	3	1	2	2	0	否	是	移植	未妊娠
592	0	2016090157	张红霞	≥35	47	2	刺激方案	1	225	≤10天	8	≤3000	1800	HCG	3	3	1	继发不孕	0.21	＞24	25.3	女方因素	6	0.76	1555	0.64	7	14.22	4.69	99.09	4	4	13.5	A	IVF	6	0	4	2	2	2	0	否	是	移植	未妊娠
1193	0	2017090227	杨秀华	≥35	41	1	降调节方案	3	250	≤10天	9	≤3000	2250	HCG	1	3	1	继发不孕	0.4	≤24	19.9	女方因素	4	3.15	1082	0.37	4	12.23	4.69	86.76	4	5	11.9	A-B	IVF	4	0	4	1	0	0	0	否	否	全胚冷冻
1460	0	2018050064	张金玲	≥35	40	2	降调节方案	3	245.385	＞10天	13	＞3000	3190	HCG	2	2	1	继发不孕	0.917	≤24	21.5	女方因素	3	1.4	968	0.5	4	10.05	4.69	33.7	4	7	9.7	B	IVF	3	0	1	0	0	0	0	否	否	全胚冷冻
1481	1	C00004966	张金玲	≥35	41	4	拮抗剂方案	2	294.231	＞10天	13	＞3000	3825	双扳机	2	2	1	继发不孕	2.340	≤24	21.5	女方因素	3	4.81	860	0.71	4	10.05	4.69	33.7	2	8	9.8	B	IVF	2	0	2	1	0	0	0	否	否	全胚冷冻
1539	0	2016040294	张红霞	≥35	47	1	刺激方案	1	231.25	＞10天	12	≤3000	2775	HCG	3	3	1	继发不孕	0.32	＞24	25.3	女方因素	3	1.3	1186	0.44	1	14.22	4.69	99.09	4	3	12.6	A	IVF	1	0	1	0	1	1	0	否	是	移植	未妊娠
1840	0	C00003520	张金玲	≥35	41	3	拮抗剂方案	2	246.429	≤10天	7	≤3000	1725	双扳机	2	2	1	继发不孕	1.22	≤24	21.5	女方因素	2	3.03	464	0.63	2	10.05	4.69	33.7	2	8	8	A-B	IVF	2	0	2	2	2	2	0	否	是	移植	未妊娠
1977	0	2017040146	王成芬	＜35	34	1	刺激方案	1	150	≤10天	7	≤3000	1050	HCG	7	0	0	原发不孕	2.08	≤24	20.4	女方因素	2	9.65	433	2.5	1	6.44	4.69	36	1	7	7.5	B	IVF	1	0	1	1	0	0	0	否	否	全胚冷冻
1978	0	2017070029	王成芬	＜35	34	2	刺激方案	1	225	≤10天	6	≤3000	1350	HCG	7	0	0	原发不孕	2.21	≤24	20.4	女方因素	2	10.83	432	3.37	2	6.44	4.69	35.42	1	7	7.7	B	IVF	2	0	2	0	0	0	0	否	否	全胚冷冻
467	1	2018060118	董云娟	≥35	45	2	刺激方案	1	300	≤10天	9	≤3000	2700	HCG	1	2	0	继发不孕	0.91	≤24	22.6	女方因素	6	9.78	1839	3.39	6	7.9	4.7	89	4	9	7	B	IVF	3	0	1	1	0	0	0	否	否	全胚冷冻
526	0	C00018146	胡传凤	＜35	34	1	拮抗剂方案	2	281.25	≤10天	8	≤3000	2250	HCG	9	2	1	继发不孕	2.89	≤24	23.5	女方因素	6	6.04	2184.3	1.18	7	5.24	4.7	28.14	1	13	16.6	A	IVF	5	0	4	2	0	0	0	否	否	全胚冷冻
721	0	C00007827	董云娟	≥35	46	3	刺激方案	1	225	≤10天	9	≤3000	2025	HCG	1	2	0	继发不孕	1.05	≤24	22.6	女方因素	5	11.98	1561	1.18	6	7.9	4.7	89	4	11	0.76	A	IVF	4	0	3	2	0	0	0	否	否	全胚冷冻
1243	0	2018020098	董云娟	≥35	44	1	刺激方案	1	233.333	≤10天	9	≤3000	2100	HCG	1	2	0	继发不孕	0.14	≤24	22.6	女方因素	3	11.79	930	1.04	5	7.9	4.7	89	4	7	6.9	B	IVF	1	0	1	0	0	0	0	否	否	全胚冷冻
1605	1	C00003918	张玉爱	≥35	44	2	刺激方案	1	300	≤10天	8	≤3000	2400	HCG	9	2	1	继发不孕	0.61	＞24	26.7	混合因素	2	8.63	994	0.76	0	12.72	4.7	31	4	6	5	A		0	0	0	0	0	0	0	是		未取到卵
1658	1	C00003415	张玉爱	≥35	44	1	刺激方案	1	300	＞10天	11	＞3000	3300	双扳机	9	2	1	继发不孕	0.6	＞24	26.7	混合因素	2	17.38	847	1.36	0	12.72	4.7	31	4	6	5.7	A		0	0	0	0	0	0	0	是		未取到卵
1884	0	2018050283	金业佩	＜35	33	1	降调节方案	3	211.364	＞10天	11	≤3000	2325	HCG	2	2	1	继发不孕	1.22	≤24	22	不明原因	6	3.92	1314	0.8	7	5.4	4.7	41	1	10	11.3	A	IVF	4	0	4	2	2	2	0	否	是	移植	已妊娠	临床妊娠	宫内妊娠	单胎宫内妊娠
45	1	C00010174	潘光红	≥35	39	1	降调节方案	3	320.455	＞10天	11	＞3000	3525	HCG	0	2	0	继发不孕	2.4	≤24	21.9	女方因素	9	2.57	2082	1.4	5	7.45	4.71	44.93	2	16	1.25	B	IVF	2	0	2	0	2	2	0	否	是	移植	未妊娠
349	1	2016080034	隋丽	＜35	33	1	降调节方案	3	318.182	＞10天	11	＞3000	3500	HCG	3	0	0	继发不孕	1.67	＞24	26	女方因素	7	0.25	1857	0.57	5	14.34	4.71	30	1	10	9.5	A	IVF	5	0	4	1	2	2	0	否	是	移植	未妊娠
361	1	C00003537	刘俊芝	≥35	39	1	降调节方案	3	368.182	＞10天	11	＞3000	4050	HCG	1	2	1	继发不孕	1.34	≤24	24	女方因素	7	1.91	1801	1.1	7	9.5	4.71	40	2	12	1.02	A	IVF	4	0	2	0	2	2	0	否	是	移植	未妊娠
378	0	2016120046	路艳杰	＜35	28	2	降调节方案	3	166.071	＞10天	14	≤3000	2325	HCG	4	0	0	原发不孕	2.48	≤24	21.3	混合因素	7	1.91	1594	0.6	6	5.43	4.71	18	1	33	14.9	A	ICSI	5	0	4	2	2	2	0	否	是	移植	已妊娠	临床妊娠	宫内妊娠	单胎宫内妊娠
1155	1	C00016200	刘俊芝	≥35	42	4	拮抗剂方案	2	291.667	≤10天	9	≤3000	2625	HCG	1	4	1	继发不孕	0.54	≤24	24	女方因素	4	4.46	1244	0.57	4	9.5	4.71	40	4	7	7.8	A	IVF	4	0	3	2	2	2	0	否	是	移植	已妊娠	临床妊娠	宫内妊娠	单胎宫内妊娠
1261	0	2017080276	郭爱玲	≥35	37	1	降调节方案	3	150	≤10天	8	≤3000	1200	HCG	2	1	0	继发不孕	1.24	≤24	21	男方因素	3	3.86	887	0.29	3	7.45	4.71	44.93	2	6	10.1	A	ICSI	3	0	2	0	2	2	0	否	是	移植	未妊娠
2126	1	2016050179	袁红彬	≥35	45	1	刺激方案	1	366.346	＞10天	13	＞3000	4762.5	双扳机	5	6	1	继发不孕	0.66	＞24	24.4	混合因素	1	9.2	422	0.56	1	14.5	4.71	40	4	3	3.2		ICSI	0	0	0	0	0	0	0	是		未受精
2200	0	C00006659	史如芹	≥35	50	2	刺激方案	1	225	≤10天	10	≤3000	2250	HCG	7	1	0	继发不孕	0.59	＞24	26.2	男方因素	1	11.19	258	0.49	1	9.49	4.71	12	4	2	8	B	ICSI	0	0	0	0	0	0	0	是		无可移植胚胎
2227	0	C00010547	王凤麟	≥35	46	3	刺激方案	1	225	≤10天	6	≤3000	1350	HCG	0	1	0	继发不孕	0.11	＞24	25.4	混合因素	1	47.56	170	0.45	0	11.73	4.71	50.5	4	3	9.7	B		0	0	0	0	0	0	0	是		未取到卵
2277	0	2017100193	史如芹	≥35	48	1	刺激方案	1	170.455	＞10天	11	≤3000	1875	HCG	7	1	0	继发不孕	0.16	＞24	26.2	女方因素	1	7.92	435	0.69	0	9.49	4.71	12	4	2				0	0	0	0	0	0	0	是		未取到卵
479	0	2017080185	刘芳琼	≥35	41	3	刺激方案	1	225	≤10天	8	≤3000	1800	HCG	3	4	1	继发不孕	1.38	≤24	20.5	女方因素	6	19.96	1724	2.03	2	10.67	4.72	48.65	2	9	6.5	B	IVF	0	0	0	0	0	0	0	是		无可移植胚胎
541	1	C00019393	刘兆凤	≥35	35	1	拮抗剂方案	2	300	≤10天	8	≤3000	2400	HCG	6	4	0	继发不孕	1.43	≤24	20.7	女方因素	6	1.53	2035.18	2.43	4	7.68	4.72	32.32	2	11	9.2	A-B	IVF	4	1	4	1	0	0	0	否	否	全胚冷冻
557	0	2016120215	刘芳琼	≥35	41	1	降调节方案	3	191.667	＞10天	12	≤3000	2300	HCG	3	4	1	继发不孕	2.47	≤24	20.5	女方因素	6	5.84	1855	1.29	4	10.67	4.72	48.65	2	9	11	A	IVF	1	0	1	0	1	1	0	否	是	移植	未妊娠
762	0	2017050227	刘芳琼	≥35	41	2	刺激方案	1	283.333	≤10天	9	≤3000	2550	HCG	3	4	1	继发不孕	2.24	≤24	20.5	女方因素	5	9.65	1302	1.73	3	10.67	4.72	38.65	2	9	9.7	A	IVF	1	0	0	0	0	0	0	是		无可移植胚胎
1909	0	2016120081	徐翠青	≥35	37	1	降调节方案	3	150	＞10天	12	≤3000	1800	HCG	12	1	0	继发不孕	1.18	≤24	21.2	女方因素	2	15.28	506	1.75	3	13.82	4.72	46	4	6	4.4	A	IVF	2	0	2	0	0	0	0	否	否	全胚冷冻
1964	1	C00003370	苟书梅	≥35	42	1	拮抗剂方案	2	450	＞10天	11	＞3000	4950	HCG	4	2	0	继发不孕	0.93	≤24	22.3	女方因素	2	5.33	473	0.93	1	10.05	4.72	20	4	9	0.7	A	IVF	0	0	0	0	0	0	0	是		无可移植胚胎
92	0	2016040218	刘晓迪	＜35	32	1	降调节方案	3	273.214	＞10天	14	＞3000	3825	HCG	4	0	0	原发不孕	1.86	≤24	23.7	不明原因	9	0.37	1998	1.29	8	8.01	4.73	40.1	1	17	13.5	A-B	IVF	3	0	1	0	1	1	0	否	是	移植	未妊娠
664	1	C00011277	牛华	≥35	37	2	刺激方案	1	300	≤10天	8	≤3000	2400	HCG	3	2	1	继发不孕	0.91	≤24	18.6	女方因素	5	11.34	1631	1.03	4	9	4.73	61.1	4	7	4.2	B	IVF	2	0	2	1	0	0	0	否	否	全胚冷冻
936	0	C00015597	孙雪岩	＜35	31	1	拮抗剂方案	2	215.625	≤10天	8	≤3000	1725	HCG	3	0	0	原发不孕	1.49	≤24	24	女方因素	4	6.64	831	0.23	4	8.94	4.73	22	1	8	13.2	A-B	IVF	2	0	2	0	2	2	0	否	是	移植	未妊娠
159	0	C00012263	杨春荣	≥35	43	3	拮抗剂方案	2	212.5	≤10天	8	≤3000	1700	HCG	3	1	1	继发不孕	0.82	≤24	23	女方因素	8	3.8	1823	0.97	4	12.08	4.74	69	4	7	1.08	A-B	IVF	1	0	1	0	0	0	0	否	否	全胚冷冻
548	0	C00018277	王海云	≥35	45	1	降调节方案	3	288.462	＞10天	13	＞3000	3750	HCG	10	2	1	继发不孕	1.42	≤24	23.4	女方因素	7	0.91	1335.54	1.14	7	6.45	4.74	12	2	17	11.4	A	IVF	7	0	6	2	2	2	0	否	是	移植	未妊娠
731	1	C00009499	杨春荣	≥35	42	2	刺激方案	1	450	＞10天	12	＞3000	5400	HCG	3	1	1	继发不孕	0.55	≤24	23	女方因素	5	8.43	1503	0.58	4	12.08	4.74	69	4	7	0.97	A	IVF	2	0	2	0	0	0	0	否	否	全胚冷冻
1255	1	2017060143	李莎	＜35	30	1	降调节方案	3	380.769	＞10天	13	＞3000	4950	HCG	2	0	0	原发不孕	1.86	＞24	36.7	女方因素	3	2.53	903	0.52	4	7.42	4.74	40	1	11	13.7	A	IVF	3	0	3	1	2	2	0	否	是	移植	已妊娠	临床妊娠	宫内妊娠	单胎宫内妊娠
1624	1	C00011858	王慧君	≥35	47	1	刺激方案	1	387.5	≤10天	6	≤3000	2325	HCG	3	1	1	原发不孕	0.47	≤24	24	女方因素	2	3.64	937	0.57	2	13.32	4.74	56	4	6	0.6	A-B	IVF	1	0	1	0	0	0	0	否	否	全胚冷冻
15	1	C00018683	郑春艳	≥35	43	1	降调节方案	3	347.917	＞10天	12	＞3000	4175	HCG	1	2	1	继发不孕	2.62	＞24	29.1	女方因素	10	0.59	2604	1.27	9	7.87	4.75	70	2	10	12.1	A	IVF	8	0	2	1	2	2	0	否	是	移植	未妊娠
211	1	2018030206	马金玲	≥35	42	3	降调节方案	3	305.357	＞10天	14	＞3000	4275	HCG	13	1	1	继发不孕	0.84	≤24	22.5	男方因素	8	0.98	1790	1.5	5	7.3	4.75	41	4	7	12.7	B	ICSI	2	0	2	0	2	2	0	否	是	移植	未妊娠
312	1	C00017333	关丽娜	＜35	33	1	拮抗剂方案	2	300	＞10天	11	＞3000	3300	HCG	1	0	0	原发不孕	1.99	≤24	19.4	女方因素	7	1.94	2235	1.37	8	7.16	4.75	55	1	12	11	A	IVF	7	0	2	1	2	2	0	否	是	移植	未妊娠
616	1	C00015260	孙彩云	＜35	32	1	刺激方案	1	425	＞10天	12	＞3000	5100	HCG	5	0	0	原发不孕	1.34	＞24	30.1	女方因素	6	4.27	1323	0.62	5	7.3	4.75	41	1	12	8.5	B	IVF	3	1	3	0	0	0	0	否	否	全胚冷冻
694	1	2016080203	陈东曼	≥35	40	4	降调节方案	3	300	≤10天	9	≤3000	2700	HCG	3	2	1	继发不孕	1.47	≤24	23.4	混合因素	5	7.04	1736	1.1	4	6.17	4.75	12	2	8	11.6	B	ICSI	2	0	1	1	0	0	0	否	否	全胚冷冻
718	0	2017020091	亓惠	≥35	37	1	降调节方案	3	225	＞10天	13	≤3000	2925	HCG	3	4	4	继发不孕	2.45	＞24	24.7	女方因素	5	1.76	1588	0.61	8	7.69	4.75	29.6	2	14	9	A	IVF	7	0	4	1	2	2	0	否	是	移植	已妊娠	临床妊娠	宫内妊娠	单胎宫内妊娠
841	1	2016030328	陈东曼	≥35	39	3	刺激方案	1	475	≤10天	9	＞3000	4275	HCG	3	2	1	继发不孕	1.44	≤24	23.4	混合因素	5	3.28	1371	0.76	6	6.17	4.75	12	2	8	9.6	A	ICSI	2	0	2	0	2	2	0	否	是	移植	未妊娠
1392	1	2017020190	陈东曼	≥35	40	6	降调节方案	3	325	≤10天	9	≤3000	2925	HCG	3	2	1	继发不孕	1.4	≤24	23.4	混合因素	3	7.06	903	0.86	5	6.17	4.75	12	2	8	9.6	A	ICSI	3	0	2	0	2	2	0	否	是	移植	未妊娠
1578	1	C00018848	麻晓霞	≥35	43	1	降调节方案	3	352.5	≤10天	10	＞3000	3525	HCG	13	2	1	原发不孕	0.84	≤24	21.1	女方因素	3	7.19	1053.96	1.29	4	16.83	4.75	28.58	4	6	11.8	A	IVF	1	0	0	0	0	0	0	是		无可移植胚胎
602	0	C00004395	刘艳华	≥35	40	1	拮抗剂方案	2	168.75	≤10天	8	≤3000	1350	HCG	1	4	1	继发不孕	1.8	＞24	24.6	女方因素	6	3.46	1498	0.28	5	6.91	4.76	47	2	12	14.4	A-B	IVF	4	0	2	0	2	2	0	否	是	移植	已妊娠	临床妊娠	宫内妊娠	单胎宫内妊娠
41	1	C00006895	王霞	＜35	29	1	刺激方案	1	479.167	＞10天	18	＞3000	8625	HCG	3	0	0	原发不孕	1.6	＞24	33.2	女方因素	9	6.8	2266	2.21	4	13.82	4.77	27.07	1	10	1.3	B	IVF	1	0	0	0	0	0	0	是		无可移植胚胎
601	1	2016040113	王莹蕊	≥35	38	1	刺激方案	1	300	≤10天	10	≤3000	3000	HCG	2	3	1	继发不孕	1.81	≤24	21.8	男方因素	6	1.72	1514	0.36	5	9.14	4.77	26	2	12	7.4	A	ICSI	3	0	3	1	0	0	0	否	否	全胚冷冻
612	0	2016060047	杨名英	≥35	46	1	刺激方案	1	168.75	≤10天	8	≤3000	1350	HCG		0	0	原发不孕	1.89	＞24	29.6	女方因素	6	0.69	1361	0.44	5	6.62	4.77	80.1	2	6	10.7	A	IVF	4	0	4	3	2	2	0	否	是	移植	未妊娠
1031	1	2018010218	王光爱	≥35	37	1	降调节方案	3	380	＞10天	15	＞3000	5700	HCG	3	2	1	继发不孕	1.89	≤24	20.8	男方因素	4	0.71	1130	0.78	5	7.54	4.77	46	2	9	1.14	A	ICSI	3	0	1	0	1	1	0	否	是	移植	未妊娠
1150	1	C00004505	王光爱	≥35	38	2	拮抗剂方案	2	525	≤10天	9	＞3000	4725	HCG	3	2	1	继发不孕	0.68	≤24	20.8	混合因素	4	4.2	1269	0.46	3	7.54	4.77	36	4	6	9.8	A	ICSI	2	0	1	1	1	1	0	否	是	移植	未妊娠
1682	1	C00006382	殷静	＜35	33	1	刺激方案	1	450	≤10天	10	＞3000	4500	HCG	3	2	1	继发不孕	0.74	＞24	24.8	女方因素	2	27.43	792	0.75	1	10.67	4.77	19.18	3	4	0.63	B	IVF	1	0	0	0	0	0	0	否	否	全胚冷冻
1763	1	C00009875	张艳明	≥35	46	3	拮抗剂方案	2	375	≤10天	10	＞3000	3750	HCG	1	6	1	继发不孕	0.52	＞24	27.2	女方因素	2	3.05	608	0.25	2	16.59	4.77	10	4	3	8.2	B	IVF	1	0	1	0	0	0	0	否	否	全胚冷冻
1939	1	C00019389	史建叶	≥35	41	7	刺激方案	1	300	＞10天	12	＞3000	3600	HCG	2	3	0	继发不孕	0.320	≤24	23.3	女方因素	2	6.88	417	0.67	3	11.56	4.77	49.09	4	5	6	C	IVF	1	0	0	0	0	0	0	是		无可移植胚胎
2210	1	C00008419	张艳明	≥35	46	1	拮抗剂方案	2	480.357	＞10天	14	＞3000	6725	双扳机	1	6	1	继发不孕	0.08	＞24	27.2	女方因素	1	4.02	242	0.75	0	16.59	4.77	10	4	3	0.68	B		0	0	0	0	0	0	0	是		未取到卵
201	1	C00016481	李霞	≥35	40	2	降调节方案	3	375	＞10天	12	＞3000	4500	HCG	4	1	1	继发不孕	1.34	≤24	21.8	女方因素	8	1.86	1913	1.78	8	7.46	4.78	52.36	2	9	13.6	A	IVF	0	0	0	0	0	0	0	是		无可移植胚胎
710	1	2016030027	张春兰	≥35	39	1	降调节方案	3	300	≤10天	8	≤3000	2400	HCG	2	1	1	继发不孕	2.49	＞24	25.8	不明原因	5	2.67	1641	0.99	6	11.42	4.78	31.75	2	9			IVF	5	0	1	0	1	1	0	否	是	移植	已妊娠	临床妊娠	宫内妊娠	单胚胎停
833	0	2018060139	范秋兰	≥35	35	1	降调节方案	3	150	≤10天	10	≤3000	1500	HCG	5	4	0	继发不孕	1.58	≤24	20.1	女方因素	5	1.37	1422	0.26	4	9.77	4.78	74	2	12	10.6	A	IVF	3	0	1	0	1	1	0	否	是	移植	已妊娠	临床妊娠	宫内妊娠	单胎宫内妊娠
1061	1	C00015479	李霞	≥35	39	1	拮抗剂方案	2	364.286	≤10天	7	≤3000	2550	HCG	3	1	1	继发不孕	1.41	≤24	21.8	女方因素	4	9.73	1644	0.69	3	7.46	4.78	52.36	2	9			IVF	3	0	1	0	1	1	0	否	是	移植	未妊娠
75	0	C00010935	王金凤	≥35	38	3	刺激方案	1	182.143	≤10天	7	≤3000	1275	HCG	8	2	1	继发不孕	1.72	＞24	24.4	混合因素	9	28.42	2376	2.1		9.59	4.79	40	2	8	0.56			0	0	0	0	0	0	0	是		未取卵
257	1	2017110246	田超清	≥35	38	3	刺激方案	1	337.5	≤10天	4	≤3000	1350	HCG	11	0	0	原发不孕	1.75	≤24	19	混合因素	7	1.92	2661	0.76	9	9.59	4.79	40	2	10	8.1	A	ICSI	5	0	2	0	2	2	0	否	是	移植	未妊娠
779	1	C00011284	王金凤	≥35	39	4	刺激方案	1	294.231	＞10天	13	＞3000	3825	HCG	8	2	1	继发不孕	1.69	＞24	24.4	女方因素	5	11.93	1760	1.62	4	9.59	4.79	40	2	8	5	B	IVF	3	0	2	0	0	0	0	否	否	全胚冷冻
924	1	C00007623	王金凤	≥35	38	1	降调节方案	3	373.438	＞10天	16	＞3000	5975	HCG	8	2	1	继发不孕	2.28	＞24	24.4	女方因素	4	1.09	887	0.36	2	9.59	4.79	40	2	8	0.61	B-C	IVF	1	0	0	0	0	0	0	是		无可移植胚胎
942	1	2016100096	荣静	＜35	32	1	刺激方案	1	366.667	≤10天	9	＞3000	3300	HCG	7	0	0	原发不孕	2.810	＞24	31.2	女方因素	4	1.49	804	0.51	5	9.59	4.79	40	1	8	8.4	A-B	IVF	4	0	2	0	2	2	0	否	是	移植	已妊娠	临床妊娠	宫内妊娠	单胚胎停
1439	1	2017030206	李秋芳	≥35	39	1	降调节方案	3	368.75	＞10天	12	＞3000	4425	HCG	1	2	1	继发不孕	0.77	≤24	20.1	女方因素	3	6.47	930	1.41	4	9.59	4.79	40	4	7	7.8	A	IVF	1	0	0	0	0	0	0	是		无可移植胚胎
1450	0	2018030161	王建玲	≥35	36	1	刺激方案	1	150	≤10天	6	≤3000	900	HCG	1	3	1	继发不孕	0.83	≤24	23.3	女方因素	3	17.14	904	0.87	2	7.39	4.79	47.1	4	6	5	B	IVF	0	0	0	0	0	0	0	是		未受精
1524	1	C00013034	王金凤	≥35	39	5	拮抗剂方案	2	293.182	＞10天	11	＞3000	3225	HCG	8	2	1	继发不孕	2.810	＞24	24.4	混合因素	3	2.32	812	0.61	4	9.59	4.79	40	2	8	9.9	A	ICSI	3	0	2	0	0	0	0	否	否	全胚冷冻
2093	0	2017090151	杜红燕	≥35	43	2	刺激方案	1	150	≤10天	6	≤3000	900	HCG	1	3	1	原发不孕	0.411	＞24	24.8	女方因素	1	5.86	485	1.53	1	11.54	4.79	35.42	4	4	8.9	A-B	IVF	1	0	1	1	0	0	0	否	否	全胚冷冻
2159	0	2017060304	杜红燕	≥35	43	1	刺激方案	1	150	≤10天	5	≤3000	750	HCG	1	3	1	原发不孕	0.06	＞24	24.8	女方因素	1	7.69	342	1.17	1	11.54	4.79	35.42	4	4	9.4		IVF	1	0	1	0	0	0	0	否	否	全胚冷冻
115	0	C00010740	姜惠真	＜35	30	1	降调节方案	3	225	≤10天	10	≤3000	2250	HCG	1	0	0	原发不孕	4.29	≤24	21.6	女方因素	9	2.93	1564	1.64	7	8.7	4.8	12.06	1	18	9.4	A-B	IVF	5	0	2	0	2	2	0	否	是	移植	已妊娠	临床妊娠	宫内妊娠	双胎宫内妊娠
543	1	2018070124	李英	＜35	30	1	降调节方案	3	323.077	＞10天	13	＞3000	4200	HCG	2	0	0	原发不孕	4.42	＞24	25.6	女方因素	7	0.96	1587	0.55	8	7.41	4.8	20.74	1	35	11.8	B	IVF	7	0	6	4	2	2	0	否	是	移植	未妊娠
732	0	2016070093	史艳艳	＜35	30	1	降调节方案	3	225	＞10天	12	≤3000	2700	HCG	3	0	0	原发不孕	3.78	≤24	19.5	女方因素	5	1.12	1497.8	1.39	9	5.59	4.8	39	1	16	14.4	A	IVF	6	0	4	2	2	2	0	否	是	移植	已妊娠	临床妊娠	宫内妊娠	双胎宫内妊娠
932	0	C00018933	郭玉环	≥35	38	1	拮抗剂方案	2	225	≤10天	7	≤3000	1575	HCG	10	1	0	继发不孕	1.52	＞24	26	女方因素	4	2.64	854.39	0.62	4	7.88	4.8	52	2	11	9.3	A	IVF	3	0	2	0	2	2	0	否	是	移植	未妊娠
1216	0	2016090145	李启霞	≥35	37	2	刺激方案	1	150	≤10天	7	≤3000	1050	HCG	5	3	1	继发不孕	1.43	≤24	22.6	女方因素	4	5.29	1147.22	1.21	4	8.51	4.8	99.09	2	7	6.7	B	IVF	4	0	4	0	0	0	0	否	否	全胚冷冻
466	1	C00007585	刘岩	＜35	34	1	降调节方案	3	300	＞10天	11	＞3000	3300	HCG	3	3	1	继发不孕	2.01	＞24	26.6	女方因素	6	1.22	1846.72	0.91	6	8.95	4.81	64	1	11	0.8	A	IVF	2	2	3	1	1	1	0	否	是	移植	未妊娠
1607	1	2018040014	李玲	≥35	41	1	拮抗剂方案	2	418.421	＞10天	19	＞3000	7950	双扳机	3	3	1	继发不孕	2.24	＞24	24.7	混合因素	2	10.2	990	0.67	3	12.65	4.81	57.66	2	9	12	A	ICSI	2	0	1	1	0	0	0	否	否	全胚冷冻
1974	1	C00007606	王娟	＜35	30	1	刺激方案	1	450	≤10天	9	＞3000	4050	HCG	3	0	0	原发不孕	1.18	≤24	20.5	女方因素	2	13.32	439	1.4	0	11.16	4.81	47	3	4	0.48	A-B		0	0	0	0	0	0	0	是		未取到卵
765	1	C00011170	王媛媛	≥35	46	4	降调节方案	3	312.5	＞10天	12	＞3000	3750	HCG	2	3	1	继发不孕	0.49	≤24	23.5	混合因素	5	9.75	1836	1.25	4	10.9	4.82	30	4	9	7.6	A-B	ICSI	1	0	1	0	1	1	0	否	是	移植	未妊娠
929	0	2017120182	赵美英	≥35	46	1	降调节方案	3	253.333	＞10天	15	＞3000	3800	HCG	3	3	2	继发不孕	0.49	＞24	26.6	女方因素	4	1.2	870	0.15	2	5.39	4.82	69	4	7	12.2	A-B	IVF	1	0	1	0	1	1	0	否	是	移植	未妊娠
996	1	C00015799	王媛媛	≥35	47	8	刺激方案	1	362.5	≤10天	8	≤3000	2900	HCG	3	3	1	继发不孕	0.89	≤24	23.5	混合因素	4	10.29	1298	1.39	4	10.9	4.82	30	4	9	6.2	A-B	ICSI	3	0	3	0	0	0	0	否	否	全胚冷冻
1637	0	2016040133	苏桂华	≥35	41	3	刺激方案	1	225	≤10天	7	≤3000	1575	HCG	1	1	1	继发不孕	0.26	≤24	18.9	女方因素	2	2.76	895	0.37	3	9.84	4.82	49.09	4	5	9.5	A	IVF	2	0	1	0	1	1	0	否	是	移植	未妊娠
2151	0	2017050044	高玉香	≥35	46	1	刺激方案	1	225	≤10天	6	≤3000	1350	HCG	3	2	1	继发不孕	0.43	＞24	24.2	女方因素	1	5.71	370	0.99	1	11.89	4.82	95.42	4	3	5.6	B	IVF	1	0	1	1	0	0	0	否	否	全胚冷冻
2213	1	2017110190	高玉香	≥35	46	4	刺激方案	1	375	＞10天	14	＞3000	5250	HCG	3	2	1	继发不孕	0.6	＞24	24.2	女方因素	1	8.68	230	0.66	1	11.89	4.82	95.42	4	4	5.6	B	IVF	0	0	0	0	0	0	0	是		无可移植胚胎
2269	0	2017070220	张美	≥35	46	1	刺激方案	1	150	≤10天	8	≤3000	1200	HCG	2	5	1	继发不孕	0.14	＞24	27.3	混合因素	1	2.27	316	0.37	0	16.14	4.82	54	4	2				0	0	0	0	0	0	0	是		未取到卵
230	1	C00011519	韩洋	≥35	36	5	刺激方案	1	300	≤10天	7	≤3000	2100	HCG	3	3	1	继发不孕	2.1	≤24	19.9	女方因素	5	10.67	1813	0.94	7	9.05	4.83	51	2	11	0.36	A	IVF	6	0	5	0	0	0	0	否	否	全胚冷冻
1081	0	C00018574	李兰兰	＜35	34	1	降调节方案	3	161.842	＞10天	19	＞3000	3075	HCG	5	2	0	继发不孕	2.21	＞24	29.4	女方因素	4	1.46	1535.92	0.75	4	6.45	4.83	34	1	40	13.7	A-B	IVF	2	1	3	0	2	2	0	否	是	移植	未妊娠
1655	0	C00003899	韩洋	≥35	35	3	拮抗剂方案	2	150	≤10天	7	≤3000	1050	HCG	3	2	0	继发不孕	0.65	≤24	19.9	女方因素	2	3.28	849	0.46	1	9.05	4.83	51	4	6	11.7	C	IVF	1	0	1	0	1	1	0	否	是	移植	未妊娠
1886	0	2016070061	李颖	＜35	33	1	拮抗剂方案	2	282.353	＞10天	17	＞3000	4800	HCG	1	2	1	继发不孕	1.94	＞24	24.2	男方因素	2	2.61	406	0.63	2	12.79	4.83	64	1	12	10.8	A	ICSI	2	0	2	0	0	0	0	否	否	全胚冷冻
276	0	C00006718	柏宗慧	＜35	33	1	降调节方案	3	225	＞10天	11	≤3000	2475	HCG	5	0	0	原发不孕	3.99	≤24	23.1	女方因素	7	2.83	2149	0.89	5	11.63	4.84	82	1	15	1.05	A	IVF	4	0	4	0	2	2	0	否	是	移植	已妊娠	临床妊娠	宫内妊娠	单胎宫内妊娠
722	0	2017080198	孙芳	≥35	35	2	刺激方案	1	225	≤10天	7	≤3000	1575	HCG	3	1	1	继发不孕	1.28	≤24	23	女方因素	5	5.65	1561	0.89	5	8.38	4.84	43	2	12	11.2	A	IVF	3	0	2	0	0	0	0	否	否	全胚冷冻
962	1	2017100236	张秀燕	＜35	28	2	刺激方案	1	415.909	＞10天	11	＞3000	4575	HCG	2	1	0	继发不孕	0.79	≤24	18.9	女方因素	4	1.96	1403	2.33	4	8.38	4.84	43	3	5	12.6	B	IVF	4	0	1	0	0	0	0	否	否	全胚冷冻
1048	0	2017100089	金同华	≥35	46	1	刺激方案	1	225	≤10天	10	≤3000	2250	HCG	1	3	2	继发不孕	1.43	＞24	26	女方因素	4	13.03	1749	0.41	5	8.38	4.84	43	2	11	4	A	IVF	2	0	2	1	0	0	0	否	否	全胚冷冻
1212	1	2017030315	张丹	≥35	36	2	降调节方案	3	300	≤10天	8	≤3000	2400	HCG	1	0	0	原发不孕	0.5	≤24	20.2	男方因素	4	13.25	1159	1.36	4	5.07	4.84	53.76	4	6	7.5	B	ICSI	3	0	2	0	0	0	0	否	否	全胚冷冻
1244	0	2018030022	吴青侠	≥35	49	1	拮抗剂方案	2	177.273	＞10天	11	≤3000	1950	HCG	1	2	2	继发不孕	0.56	＞24	26.2	女方因素	3	2.56	926	0.53	2	12.17	4.84	96.43	4	4	12.1	A	IVF	0	0	0	0	0	0	0	是		无可移植胚胎
1355	0	2017090163	张丹	≥35	36	4	拮抗剂方案	2	214.286	＞10天	14	≤3000	3000	HCG	1	0	0	原发不孕	1.29	≤24	20.2	男方因素	3	25.43	563	0.57	1	5.07	4.84	53.76	2	6	8.8	B	ICSI	1	0	0	0	0	0	0	是		无可移植胚胎
1374	0	2016050053	薛维芳	≥35	42	4	拮抗剂方案	2	225	≤10天	5	≤3000	1125	HCG	2	2	1	继发不孕	1.69	＞24	24.9	混合因素	3	0.87	448	0.27	2	8.63	4.84	36.43	2	8	11	A	ICSI	1	0	2	0	2	2	0	否	是	移植	已妊娠	临床妊娠	宫内妊娠	单胚胎停
1927	0	2017060161	张秀燕	＜35	28	1	刺激方案	1	225	≤10天	5	≤3000	1125	HCG	2	1	0	继发不孕	1.16	≤24	18.9	女方因素	2	4.83	463	1.1	2	8.38	4.84	43	3	5	9.2	B	IVF	1	0	2	0	0	0	0	否	否	全胚冷冻
131	1	C00004187	张敏	≥35	42	4	刺激方案	1	429.545	＞10天	11	＞3000	4725	HCG	5	1	0	继发不孕	1.13	＞24	29.1	女方因素	8	7.89	1690	1.15	6	9.8	4.85	77.07	4	8	0.61	B	IVF	2	0	2	0	0	0	0	否	否	全胚冷冻
590	0	2017100083	苏静	≥35	35	2	降调节方案	3	225	≤10天	9	≤3000	2025	HCG	3	1	1	继发不孕	2.06	≤24	22.8	女方因素	6	0.77	1558	1.43	7	4.83	4.85	51.75	2	9	11	A	IVF	6	0	2	0	2	2	0	否	是	移植	已妊娠	临床妊娠	宫内妊娠	单胎宫内妊娠
918	1	2016030226	张敏	≥35	39	2	刺激方案	1	300	≤10天	10	≤3000	3000	HCG	5	1	0	继发不孕	4.5	＞24	29.1	不明原因	4	4.86	952	0.6	4	8.45	4.85	77.07	2	8	7.6	A	IVF	2	0	2	0	0	0	0	否	否	全胚冷冻
1217	1	2018060090	张敏	≥35	41	3	刺激方案	1	429.545	＞10天	11	＞3000	4725	HCG	5	1	0	继发不孕	1.31	＞24	29.1	不明原因	4	4.41	1143	0.72	4	9.8	4.85	77.07	2	8	6.3	B	IVF	1	0	1	0	0	0	0	否	否	全胚冷冻
1307	0	C00004964	贾希菊	≥35	45	2	拮抗剂方案	2	250	＞10天	12	≤3000	3000	双扳机	1	3	2	继发不孕	0.99	＞24	30.1	女方因素	3	4.82	746	1.03	3	5.99	4.85	68	4	6	10	A-B	IVF	1	0	2	0	2	2	0	否	是	移植	未妊娠
1498	1	2018050017	薛建红	≥35	43	1	降调节方案	3	300	≤10天	5	≤3000	1500	HCG	1	8	2	继发不孕	1.090	＞24	27.9	女方因素	3	2.29	958	2.57	2	9.82	4.85	50.1	4	4	8.6	A	IVF	0	0	0	0	0	0	0	是		无可移植胚胎
1873	0	2018060157	贾希菊	≥35	45	1	拮抗剂方案	2	262.5	＞10天	12	＞3000	3150	双扳机	1	2	2	继发不孕	0.95	＞24	30.1	女方因素	2	2.01	340	0.41	2	5.99	4.85	68	4	6	7.9	A	IVF	1	0	1	1	1	1	0	否	是	移植	已妊娠	临床妊娠	宫内妊娠	单胚胎停
2005	1	2016050170	刘业静	≥35	42	5	刺激方案	1	428.571	≤10天	7	≤3000	3000	双扳机	1	5	1	继发不孕	0.7	＞24	25.4	女方因素	1	7.28	951	1.02	0	15.78	4.85	46.43	4	3	5.5	B		0	0	0	0	0	0	0	是		未取到卵
2133	1	C00006738	贾希菊	≥35	46	4	刺激方案	1	328.846	＞10天	13	＞3000	4275	HCG	1	3	2	继发不孕	0.92	＞24	30.1	女方因素	1	17.22	404	0.28	1	5.99	4.85	68	4	6	8.5	A	IVF	0	0	1	0	1	1	0	否	是	移植	未妊娠
2264	1	2016100020	刘业静	≥35	46	6	降调节方案	3	350	≤10天	9	＞3000	3150	HCG	1	5	1	继发不孕	0.427	＞24	25.4	女方因素	1	16.2	324	0.11		17.89	4.85	78.43	4	3				0	0	0	0	0	0	0	是		未取卵
486	0	C00015498	王晴晴	＜35	34	2	拮抗剂方案	2	262.5	＞10天	12	＞3000	3150	双扳机	1	1	0	继发不孕	1.35	≤24	21.5	女方因素	6	7.4	1648	0.68	2	3.95	4.86	86.43	1	8	14.9	B	IVF	2	0	2	0	2	2	0	否	是	移植	未妊娠
726	0	C00016863	王晴晴	＜35	34	4	刺激方案	1	288.462	＞10天	13	＞3000	3750	HCG	1	1	0	继发不孕	2.18	≤24	21.5	女方因素	5	1.28	1545	0.87	4	3.95	4.86	66.43	1	8	14.8	B	IVF	3	0	2	0	0	0	0	否	否	全胚冷冻
1171	1	2017110056	侯艳艳	＜35	33	2	降调节方案	3	300	≤10天	8	≤3000	2400	HCG	6	0	0	原发不孕	1.13	≤24	23.8	不明原因	4	0.71	1180	0.57	2	6.63	4.86	37	3	8	10.5	A	IVF	1	0	0	0	0	0	0	是		无可移植胚胎
1591	1	2017050190	侯艳艳	＜35	33	1	刺激方案	1	345	≤10天	10	＞3000	3450	HCG	6	0	0	原发不孕	2.48	≤24	23.8	女方因素	3	3.43	1025	1.57	2	6.63	4.86	37	1	8	10.7	A-B	IVF	1	0	1	0	1	1	0	否	是	移植	已妊娠	生化妊娠	生化妊娠	生化妊娠
2052	1	2016110158	邢爱景	≥35	48	3	刺激方案	1	300	≤10天	8	≤3000	2400	HCG	1	0	0	继发不孕	0.54	≤24	22.8	女方因素	1	7.84	651	0.54	1	18.35	4.86	41	4	2	7.1	A	IVF	1	0	1	0	0	0	0	否	否	全胚冷冻
2263	0	C00016642	王晴晴	＜35	34	3	拮抗剂方案	2	262.5	＞10天	22	＞3000	5775	双扳机	1	1	0	继发不孕	1.26	≤24	21.5	混合因素	1	7.57	326	0.68	0	3.95	4.86	66.43	1	8				0	0	0	0	0	0	0	是		未取到卵
340	1	2017030246	刘春娥	≥35	38	1	刺激方案	1	352.941	＞10天	17	＞3000	6000	HCG	6	1	1	原发不孕	2.93	＞24	29.1	女方因素	7	1.64	1927	0.87	5	7.93	4.87	69	2	8	12.5	B	IVF	4	0	4	4	2	2	0	否	是	移植	已妊娠	临床妊娠	宫内妊娠	单胎宫内妊娠
498	1	C00010759	季廷芳	≥35	44	1	刺激方案	1	300	≤10天	9	≤3000	2700	HCG	2	3	1	继发不孕	2.83	≤24	23	女方因素	6	7.1	2497	0.97	5	11.76	4.87	29.8	2	9	0.41	A-B	IVF	3	0	3	3	0	0	0	否	否	全胚冷冻
1007	0	2017070126	苑纪昆	＜35	33	1	降调节方案	3	275	＞10天	12	＞3000	3300	HCG	4	0	0	原发不孕	1.34	≤24	19.7	女方因素	4	2.07	1244	1.08	4	7.77	4.87	35	1	12	12.4	A	IVF	3	0	0	0	0	0	0	是		无可移植胚胎
1053	1	2016050236	王凤杰	≥35	39	1	降调节方案	3	350	＞10天	13	＞3000	4550	HCG	6	1	1	继发不孕	0.66	≤24	22.6	女方因素	4	1.3	1706	0.48	1	7	4.87	41.75	4	3	12.6	B	IVF	1	0	0	0	0	0	0	是		无可移植胚胎
1273	1	2018050167	魏秀燕	≥35	38	1	刺激方案	1	375	≤10天	10	＞3000	3750	HCG	1	4	1	继发不孕	1.3	＞24	26.2	女方因素	3	15.31	860	1.19	5	13.33	4.87	55.42	2	10	6.2	B	IVF	1	0	1	0	0	0	0	否	否	全胚冷冻
1433	1	2016100165	王凤杰	≥35	39	3	降调节方案	3	513.462	＞10天	13	＞3000	6675	HCG	6	1	1	继发不孕	0.46	≤24	22.6	混合因素	3	4.49	945	1.27	2	7	4.87	41.75	4	3	8.3	C	ICSI	1	0	0	0	0	0	0	是		无可移植胚胎
1813	1	C00010981	穆金丽	≥35	40	2	降调节方案	3	405.556	＞10天	18	＞3000	7300	HCG	6	0	0	原发不孕	1.57	＞24	35.4	混合因素	2	3.13	525	0.44	0	11	4.87	23	2	8	11.2	A		0	0	0	0	0	0	0	是		未取到卵
1991	1	C00008285	穆金丽	≥35	38	1	拮抗剂方案	2	390	≤10天	10	＞3000	3900	HCG	6	0	0	原发不孕	1.55	＞24	35.4	女方因素	2	10.67	486	0.62	2	11	4.87	23	2	8	9.6	A	IVF	1	0	1	1	0	0	0	否	否	全胚冷冻
2062	1	2016080150	王凤杰	≥35	39	2	拮抗剂方案	2	337.5	＞10天	12	＞3000	4050	HCG	6	1	1	继发不孕	0.57	≤24	22.6	混合因素	1	1.4	593	0.11	0	7	4.87	91.75	4	3	12.8	B		0	0	0	0	0	0	0	是		未取到卵
2233	0	2017070146	姚冬梅	≥35	40	1	拮抗剂方案	2	150	≤10天	6	≤3000	900	HCG	15	0	0	原发不孕	0.41	≤24	19.8	女方因素	1	4.22	150	0.29	0	15.67	4.87	75.69	4	3	6.4	A		0	0	0	0	0	0	0	是		未取到卵
28	0	C00011900	刘如芳	≥35	37	2	降调节方案	3	240	≤10天	10	≤3000	2400	HCG	4	3	0	继发不孕	2.66	＞24	32	女方因素	9	0.8	1836	0.31	6	9.19	4.88	52	2	14	1.02	A	IVF	0	0	0	0	0	0	0	是		无可移植胚胎
749	1	C00010075	杨旭	＜35	29	1	刺激方案	1	300	≤10天	10	≤3000	3000	HCG	2	0	0	原发不孕	1.884	≤24	20.4	男方因素	5	6.82	1401	0.86	5	10.56	4.88	29	1	13	0.81	B	ICSI	3	0	2	1	0	0	0	否	否	全胚冷冻
1649	1	C00006882	赵静	≥35	38	1	拮抗剂方案	2	332.143	≤10天	7	≤3000	2325	HCG	6	2	0	继发不孕	0.60	≤24	20.9	混合因素	2	10.92	865	0.39	2	11	4.88	75	4	3	11.5	A	ICSI	1	0	0	0	1	1	0	否	是	移植	未妊娠
1811	0	2016110208	卞艳艳	＜35	32	2	刺激方案	1	262.5	≤10天	8	≤3000	2100	HCG	2	0	0	原发不孕	0.53	＞24	27.3	男方因素	2	5.15	527	1.65	2	7.88	4.88	55.42	3	3	5.7	A-B	ICSI	1	0	1	0	0	0	0	否	否	全胚冷冻
2069	0	C00011071	赵静	≥35	38	2	刺激方案	1	150	≤10天	5	≤3000	750	HCG	6	2	0	继发不孕	0.46	≤24	20.9	混合因素	1	14.45	569	1.19	1	11	4.88	75	4	3	3.8	B	ICSI	1	0	0	0	0	0	0	是		无可移植胚胎
2098	1	2017050058	卞艳艳	＜35	32	3	刺激方案	1	350	＞10天	24	＞3000	8400	双扳机	2	0	0	原发不孕	0.56	＞24	27.3	女方因素	1	2.9	467	1.41	0	7.88	4.88	93.36	3	3	9.5	B		0	0	0	0	0	0	0	是		未取到卵
2171	1	2016090127	卞艳艳	＜35	32	1	刺激方案	1	333.333	＞10天	18	＞3000	6000	HCG	2	0	0	原发不孕	0.18	＞24	27.3	女方因素	1	5.97	322	0.83	2	7.88	4.88	93.36	3	3	8	B	IVF	0	0	0	0	0	0	0	是		未受精
139	0	2017110016	刘福银	＜35	33	1	降调节方案	3	150	≤10天	10	≤3000	1500	HCG	4	2	0	继发不孕	3.92	≤24	24	女方因素	8	3.12	2320	0.54	9	5.34	4.89	45	1	16	10.7	A-B	IVF	5	0	3	0	0	0	0	否	否	全胚冷冻
898	1	C00013097	张红芹	＜35	32	2	拮抗剂方案	2	325	≤10天	10	＞3000	3250	HCG	3	2	0	继发不孕	2.27	＞24	25.4	女方因素	5	2.63	1050	0.64	6	9.41	4.89	61	1	16	10.3	A	IVF	0	0	0	0	0	0	0	是		无可移植胚胎
1300	0	2016070078	刘莹	＜35	28	3	刺激方案	1	225	≤10天	8	≤3000	1800	HCG	4	1	0	继发不孕	1.86	＞24	29.3	女方因素	3	5.23	779	0.69	3	6.8	4.89	51	1	6	13.5	A	IVF	2	0	1	1	0	0	0	否	否	全胚冷冻
1506	1	2016050021	王凤	＜35	33	3	降调节方案	3	381.25	＞10天	12	＞3000	4575	HCG	5	0	0	原发不孕	2.78	≤24	19.5	女方因素	3	3.95	928	1.33	3	12.9	4.89	86.43	1	10	14.5	A-B	IVF	1	0	2	0	2	2	0	否	是	移植	未妊娠
1998	1	2017090153	杨云云	＜35	34	4	刺激方案	1	375	＞10天	12	＞3000	4500	HCG	2	1	1	继发不孕	1.26	≤24	23.4	男方因素	2	3.88	490	0.49	3	5.34	4.89	45	1	6	11.9	A	ICSI	2	0	1	0	0	0	0	否	否	全胚冷冻
446	1	C00014606	王洪丽	≥35	36	1	刺激方案	1	300	≤10天	7	≤3000	2100	HCG	8	1	0	继发不孕	1.82	≤24	20	混合因素	6	7.01	1824	1.41	8	6.35	4.9	65	2	11	0.8	B	ICSI	4	0	4	0	0	0	0	否	否	全胚冷冻
716	0	2016110046	任玉莲	＜35	32	1	降调节方案	3	282.692	＞10天	13	＞3000	3675	HCG	4	0	0	原发不孕	2.85	＞24	25.3	女方因素	5	1.26	1603	1.56	8	8.21	4.9	46.43	1	12	10.7		IVF	6	0	4	1	0	0	0	否	否	全胚冷冻
1219	1	2016030072	李玲玲	＜35	29	1	降调节方案	3	400	＞10天	12	＞3000	4800	HCG	1	4	0	继发不孕	0.62	≤24	21.4	女方因素	4	1.84	1129	0.93	3	14.28	4.9	32	3	5	9	A	IVF	3	0	2	0	2	2	0	否	是	移植	未妊娠
1280	0	C00008525	张芹	＜35	32	2	降调节方案	3	233.654	＞10天	13	＞3000	3037.5	HCG	4	1	1	继发不孕	2.76	≤24	20	混合因素	3	1.78	848	0.67	1	10.64	4.9	52	1	11	9.2	A	ICSI	1	0	0	0	0	0	0	是		无可移植胚胎
1781	1	2016120006	李平	＜35	34	1	降调节方案	3	511.364	＞10天	11	＞3000	5625	HCG	5	0	0	原发不孕	1.84	＞24	25.9	女方因素	2	2.85	580	0.48	1	9.9	4.9	40.37	1	7	12.8	A	IVF	1	0	0	0	0	0	0	是		无可移植胚胎
1966	1	2016110236	罗锦旻	≥35	40	1	降调节方案	3	410.294	＞10天	17	＞3000	6975	HCG	2	1	0	继发不孕	2.91	≤24	17.2	混合因素	2	5.9	469	2.67	2	11.9	4.9	40.37	2	6	9.6	A-B	ICSI	4	0	1	0	0	0	0	否	否	全胚冷冻
2153	1	2016030100	耿雪	＜35	27	1	降调节方案	3	420	≤10天	10	＞3000	4200	HCG	3	0	0	原发不孕	0.796	≤24	19	女方因素	1	1.86	363	0.32	1	11.9	4.9	78.37	3	5	14.2	A	IVF	1	0	1	0	0	0	0	否	否	全胚冷冻
208	1	2017060196	杨磊	≥35	37	2	刺激方案	1	311.538	＞10天	13	＞3000	4050	HCG	14	0	0	原发不孕	2.41	＞24	28	女方因素	8	0.86	1832	0.78	7	8.83	4.91	31.75	2	15	14.7	A	IVF	7	0	2	0	2	2	0	否	是	移植	未妊娠
274	1	2016040287	段凯英	≥35	40	3	刺激方案	1	375	≤10天	6	≤3000	2250	HCG	2	1	1	继发不孕	1.64	≤24	22.9	混合因素	7	3.39	2164	0.75	7	7.67	4.91	40	2	13	6.2	A	ICSI	5	0	1	0	0	0	0	否	否	全胚冷冻
364	0	2016110275	杨磊	≥35	37	1	降调节方案	3	242.308	＞10天	13	＞3000	3150	HCG	14	0	0	原发不孕	1.67	＞24	28	女方因素	7	1.23	1773	0.97	6	8.83	4.91	51.75	2	15	18.3	A-B	IVF	4	0	1	1	0	0	0	否	否	全胚冷冻
1851	0	2018050057	闫春华	≥35	36	1	刺激方案	1	225	≤10天	7	≤3000	1575	HCG	3	1	1	继发不孕	1.80	＞24	27	女方因素	2	8.88	422	0.5	3	10.4	4.91	93.36	2	7	8.4	A	IVF	1	0	1	0	0	0	0	否	否	全胚冷冻
35	1	C00003369	周春艳	≥35	40	2	降调节方案	3	300	＞10天	14	＞3000	4200	HCG	3	2	0	继发不孕	1.86	≤24	20.3	女方因素	9	1.07	1443	1.42	5	5.93	4.92	53.77	2	11	12.1	A	IVF	3	0	3	2	2	2	0	否	是	移植	未妊娠
318	1	2016080142	侯喜春	＜35	31	2	刺激方案	1	354.545	＞10天	11	＞3000	3900	HCG	1	0	0	原发不孕	1.31	≤24	20.9	混合因素	7	3.54	2187	0.7	6	10.64	4.92	40	1	11	17	A-B	ICSI	4	0	2	0	0	0	0	否	否	全胚冷冻
347	1	2018020002	周春艳	≥35	39	1	刺激方案	1	316.667	≤10天	9	≤3000	2850	HCG	3	2	0	继发不孕	1.21	≤24	20.3	不明原因	7	14.83	1864	2.22	7	5.93	4.92	43.77	2	11	7.3	B	IVF	1	0	1	0	0	0	0	否	否	全胚冷冻
403	1	C00004863	王圆圆	＜35	29	1	拮抗剂方案	2	314.286	＞10天	14	＞3000	4400	HCG	3	2	0	继发不孕	2.52	≤24	22.3	女方因素	7	1.09	1283	0.33	8	10.41	4.92	75	1	15	10.6	A	IVF	5	0	2	1	2	2	0	否	是	移植	已妊娠	临床妊娠	宫外妊娠	异位妊娠
916	0	C00015892	郝黎黎	≥35	37	2	拮抗剂方案	2	200	≤10天	9	≤3000	1800	HCG	6	1	0	继发不孕	2.04	≤24	21	女方因素	4	4.05	955	1.42	3	8.15	4.92	41.2	2	9	0.94	A	IVF	3	0	2	0	2	2	0	否	是	移植	未妊娠
1254	1	2016070130	刘晓黎	≥35	35	1	刺激方案	1	300	≤10天	8	≤3000	2400	HCG	3	2	1	继发不孕	1.35	≤24	21.6	女方因素	3	2.54	904	0.77	4	8.63	4.92	25	2	7	10	A	IVF	2	0	2	1	0	0	0	否	否	全胚冷冻
1720	1	2017110128	王芬	＜35	28	1	刺激方案	1	300	≤10天	8	≤3000	2400	HCG	5	0	0	原发不孕	0.712	≤24	21.1	女方因素	2	16.8	713	1.4	1	8.15	4.92	41.2	3	5	6.5	B	IVF	0	0	0	0	0	0	0	是		无可移植胚胎
2120	1	2018040196	侯喜春	＜35	33	3	降调节方案	3	450	≤10天	10	＞3000	4500	HCG	3	0	0	原发不孕	2.7	≤24	20.9	男方因素	1	1.42	434	0.41	2	10.64	4.92	40	1	8	13.9	A	ICSI	2	0	1	0	0	0	0	否	否	全胚冷冻
2275	1	2016120102	刘晓黎	≥35	36	2	刺激方案	1	300	≤10天	7	≤3000	2100	HCG	3	2	1	继发不孕	2.19	≤24	21.6	女方因素	5	2.87	1206	0.09	5	8.63	4.92	25	2	7			IVF	2	0	2	0	0	0	0	否	否	全胚冷冻
999	1	C00011992	王乃凤	≥35	45	2	刺激方案	1	393.75	≤10天	8	＞3000	3150	HCG	6	4	1	原发不孕	0.61	＞24	26.8	女方因素	4	4.36	1290	0.41	2	13.65	4.93	77	4	4	0.49	A-B	IVF	2	0	2	2	0	0	0	否	否	全胚冷冻
1848	0	2017120167	陈红燕	≥35	45	1	刺激方案	1	158.333	≤10天	9	≤3000	1425	HCG	3	1	1	继发不孕	0.48	＞24	27.8	女方因素	2	4.23	435	0.18	1	10.08	4.93	34.76	4	11	10.8	A	IVF	1	0	1	0	1	1	0	否	是	移植	未妊娠
2053	1	C00011765	王乃凤	≥35	45	1	拮抗剂方案	2	357.143	≤10天	7	≤3000	2500	双扳机	6	4	1	原发不孕	0.70	＞24	26.8	女方因素	1	10.5	647	0.44	1	13.65	4.93	77	4	4	0.4	A	IVF	1	0	1	0	0	0	0	否	否	全胚冷冻
459	0	2017110020	全玉荣	≥35	36	1	降调节方案	3	200	＞10天	12	≤3000	2400	HCG	3	1	0	继发不孕	5.75	≤24	23.7	女方因素	6	2.87	1698	2.03	8	5.94	4.94	35.42	2	15	9.9	A	IVF	8	0	4	1	0	0	0	否	否	全胚冷冻
603	0	C00004703	孙雪	＜35	32	1	降调节方案	3	287.5	＞10天	12	＞3000	3450	HCG	2	2	0	继发不孕	2.3	＞24	24.6	女方因素	6	1	1470	0.81	4	6.63	4.94	41.76	1	11	9.7	A	IVF	2	0	0	0	2	2	0	否	是	移植	已妊娠	临床妊娠	宫内妊娠	双胎宫内妊娠
655	0	2016060107	王燕	≥35	37	3	降调节方案	3	225	≤10天	8	≤3000	1800	HCG	2	3	1	继发不孕	0.92	＞24	25.3	女方因素	5	1.14	1685	0.3	4	5.99	4.94	55.42	4	7	10.2	A	IVF	4	0	2	0	2	2	0	否	是	移植	未妊娠
750	1	C00018580	张秋梅	≥35	42	2	刺激方案	1	427.273	＞10天	11	＞3000	4700	HCG	3	2	1	继发不孕	0.49	＞24	25	男方因素	5	6.38	1401	0.47	5	12.09	4.94	19.55	4	7	5	A	ICSI	1	0	1	0	0	0	0	否	否	全胚冷冻
1922	1	C00016838	张秋梅	≥35	42	1	刺激方案	1	391.667	＞10天	15	＞3000	5875	HCG	3	2	1	继发不孕	1.04	＞24	25	男方因素	2	9.46	473	1.08	3	12.09	4.94	19.55	4	4	10.8	A	ICSI	2	0	2	0	0	0	0	否	否	全胚冷冻
2040	0	C00003496	杨咏梅	≥35	43	2	拮抗剂方案	2	240	≤10天	5	≤3000	1200	双扳机	1	4	1	继发不孕	0.76	≤24	19.8	混合因素	1	21.65	367	0.46		18.97	4.94	84	4	3	9.1	B		0	0	0	0	0	0	0	是		未取卵
454	0	2018010182	赵艳芳	≥35	36	1	降调节方案	3	218.182	＞10天	11	≤3000	2400	HCG	3	1	1	继发不孕	1.79	≤24	22.9	男方因素	6	1.9	1761	0.73	5	7.06	4.95	45.08	2	12	12.5	A	IVF	1	0	1	0	1	1	0	否	是	移植	未妊娠
472	0	2017080268	仪美娟	≥35	36	1	降调节方案	3	256.25	≤10天	10	≤3000	2562.5	HCG	1	3	1	继发不孕	1.62	＞24	24.2	不明原因	6	3.77	1798	0.8	9	9.12	4.95	76.43	2	12	11	B	ICSI	6	0	2	2	0	0	0	否	否	全胚冷冻
490	0	2018070073	赵艳芳	≥35	36	2	刺激方案	1	120	＞10天	15	≤3000	1800	HCG	3	1	1	继发不孕	3.8	≤24	22.9	女方因素	6	5.51	2577	1.01	5	7.06	4.95	45.08	2	12	6.3	A	IVF	0	0	0	0	0	0	0	是		未受精
1095	1	2018050136	贺倩倩	＜35	26	1	拮抗剂方案	2	425	≤10天	8	＞3000	3400	HCG	1	0	0	原发不孕	1.8	≤24	23.7	混合因素	4	2.36	1457	0.79	4	15.2	4.95	76.46	1	6	13.5	A	ICSI	2	0	2	1	0	0	0	否	否	全胚冷冻
1127	1	2017060028	许艳芳	≥35	45	3	拮抗剂方案	2	333.333	≤10天	9	≤3000	3000	HCG	2	3	2	继发不孕	0.45	＞24	24.8	女方因素	4	0.45	1355	2.84	1	9.69	4.95	56.4	4	7	22.1	B	IVF	0	0	1	0	0	0	0	否	否	全胚冷冻
1190	1	2016100224	许艳芳	≥35	44	2	刺激方案	1	406.25	＞10天	12	＞3000	4875	HCG	2	3	2	继发不孕	0.75	＞24	24.8	女方因素	4	0.88	1099	0.5	6	9.69	4.95	56.4	4	7	11	B	IVF	4	0	4	3	0	0	0	否	否	全胚冷冻
1461	1	C00005229	贺倩倩	＜35	27	2	拮抗剂方案	2	485.714	≤10天	7	＞3000	3400	HCG	1	0	0	原发不孕	1.8	≤24	23.7	混合因素	3	5.96	961	1.71	5	15.2	4.95	76.46	1	6	13.2	A-B	ICSI	4	0	2	2	2	2	0	否	是	移植	已妊娠	临床妊娠	宫内妊娠	单胎宫内妊娠
7	0	2017110216	陈晓花	≥35	42	2	降调节方案	3	180.769	＞10天	13	≤3000	2350	HCG	2	1	1	继发不孕	1.81	＞24	26.2	女方因素	10	1.3	2099	0.84	9	9.76	4.96	69.5	2	13	15.1	A	IVF	4	0	2	0	2	2	0	否	是	移植	未妊娠
167	0	2017040178	陈晓花	≥35	41	1	降调节方案	3	225	≤10天	10	≤3000	2250	HCG	2	1	1	继发不孕	2.43	＞24	26.2	女方因素	8	2.4	2640	1.67	6	9.76	4.96	69.5	2	13	14.1	A	IVF	4	0	2	0	0	0	0	否	否	全胚冷冻
1023	1	2016030216	孙蕾	≥35	37	2	刺激方案	1	375	≤10天	7	≤3000	2625	HCG	3	2	0	继发不孕	2.95	≤24	19.5	不明原因	4	3.86	1180	0.62	4	7.2	4.96	46.43	2	10			IVF	3	0	2	1	2	2	0	否	是	移植	未妊娠
1937	0	2018010126	张玉清	≥35	36	1	刺激方案	1	287.5	＞10天	12	＞3000	3450	HCG	3	1	1	继发不孕	1.92	≤24	20	男方因素	2	12.96	422	0.46	1	5.72	4.96	58.4	2	7	5.8	B	IVF	0	0	0	0	0	0	0	是		无可移植胚胎
517	1	2016080101	张兰	≥35	40	1	刺激方案	1	300	≤10天	7	≤3000	2100	HCG	17	0	0	原发不孕	1.74	≤24	19.5	混合因素	6	1.54	2282	0.68	5	8.18	4.97	73.7	2	10	11.8	A	ICSI	3	0	2	1	2	2	0	否	是	移植	未妊娠
787	0	2017030158	张兰	≥35	40	3	降调节方案	3	205	≤10天	10	≤3000	2050	HCG	17	0	0	原发不孕	2.680	≤24	19.5	混合因素	5	4.2	1692	0.54	5	8.18	4.97	73.7	2	10	11.3	A	ICSI	3	0	2	0	2	2	0	否	是	移植	未妊娠
1213	0	2017110106	王慧慧	＜35	28	1	降调节方案	3	215.625	≤10天	8	≤3000	1725	HCG	5	0	0	原发不孕	1.42	≤24	21.1	女方因素	4	2.67	1159	0.95	3	6.42	4.97	26.43	1	8	9.7	A	IVF	2	0	2	2	2	2	0	否	是	移植	已妊娠	临床妊娠	宫内妊娠	双胎宫内妊娠
1376	1	2016120124	张兰	≥35	40	2	刺激方案	1	300	≤10天	7	≤3000	2100	HCG	17	0	0	原发不孕	2.49	≤24	19.5	混合因素	3	7.49	437	0.69	3	8.18	4.97	73.7	2	10	10	B	ICSI	1	0	1	0	1	1	0	否	是	移植	未妊娠
1547	0	C00015504	邓秀芝	≥35	42	1	拮抗剂方案	2	225	≤10天	8	≤3000	1800	HCG	1	3	1	继发不孕	1.38	≤24	21.5	女方因素	3	4.58	1165	1.09	4	10.63	4.98	76.43	2	8	1.14	A-B	IVF	1	0	2	0	2	2	0	否	是	移植	未妊娠
280	1	C00013070	王玮玮	≥35	39	2	刺激方案	1	375	＞10天	12	＞3000	4500	HCG	6	1	1	继发不孕	1.69	≤24	23.4	女方因素	7	3.63	2114	0.85	8	13.11	4.99	52	2	11	1.45	A	IVF	6	0	2	0	2	2	0	否	是	移植	未妊娠
529	0	C00015427	王玮玮	≥35	39	3	刺激方案	1	285	≤10天	10	≤3000	2850	HCG	6	1	1	继发不孕	1.30	≤24	23.4	女方因素	6	4.04	2146	0.85	5	13.11	4.99	52	2	11	1.5	A	IVF	3	0	2	0	2	2	0	否	是	移植	未妊娠
1262	1	C00015627	姜婷婷	＜35	31	2	拮抗剂方案	2	359.375	≤10天	8	≤3000	2875	HCG	1	2	0	继发不孕	1.76	≤24	18	女方因素	3	3.91	886	1.29	3	13.37	4.99	53	1	10	10.4	A	IVF	3	0	2	2	0	0	0	否	否	全胚冷冻
1437	1	C00010898	王玮玮	≥35	38	1	刺激方案	1	400	≤10天	9	＞3000	3600	HCG	6	1	1	继发不孕	1.42	≤24	23.4	女方因素	3	6.41	934.4	0.83	5	13.11	4.99	52	2	11	0.87	A	IVF	3	0	2	1	0	0	0	否	否	全胚冷冻
1559	1	C00012967	李素霞	＜35	34	1	拮抗剂方案	2	320.833	≤10天	9	≤3000	2887.5	HCG	10	1	1	继发不孕	1.48	＞24	27.3	女方因素	3	5.47	1136	0.95	4	7.42	4.99	61	1	9	152	B	IVF	0	0	0	0	0	0	0	是		无可移植胚胎
1731	1	C00006125	潘和枝	≥35	40	1	拮抗剂方案	2	425	≤10天	8	＞3000	3400	HCG	3	3	1	原发不孕	1.05	≤24	21.5	女方因素	2	9.75	676	0.6	2	9.57	4.99	67	4	6	7.6	A	IVF	2	0	2	0	2	2	0	否	是	移植	未妊娠
2015	1	C00014845	姜婷婷	＜35	31	1	拮抗剂方案	2	300	≤10天	9	≤3000	2700	双扳机	1	2	0	继发不孕	1.79	≤24	18	女方因素	1	2.9	824	0.69	1	13.37	4.99	53	1	7	9.8	A	IVF	1	0	1	0	0	0	0	否	否	全胚冷冻
109	0	C00006052	孙静静	＜35	28	1	降调节方案	3	201.562	＞10天	16	＞3000	3225	HCG	2	0	0	原发不孕	1.58	＞24	27.1	女方因素	9	1.25	1837	0.67	5	3.58	5	37	1	32	9.2	A	IVF	4	0	1	1	1	1	0	否	是	移植	未妊娠
166	0	C00010251	赵雷雷	＜35	30	1	拮抗剂方案	2	277.5	≤10天	10	≤3000	2775	HCG	1	3	0	继发不孕	2.74	＞24	26.4	女方因素	6	2.27	1309	0.92	9	6.46	5	26.97	1	12	1.5	B	IVF	5	0	5	1	2	2	0	否	是	移植	已妊娠	临床妊娠	宫内妊娠	单胎宫内妊娠
390	0	C00016033	刘婷	＜35	30	1	降调节方案	3	245.455	＞10天	11	≤3000	2700	HCG	2	0	0	原发不孕	2.47	≤24	19.9	女方因素	7	1.26	1488	0.89	7	11.55	5	40	1	14	13.5	A	IVF	4	0	2	0	2	2	0	否	是	移植	已妊娠	临床妊娠	宫内妊娠	双胎宫内妊娠
1398	1	C00007403	吕军迎	≥35	41	1	拮抗剂方案	2	316.667	≤10天	9	≤3000	2850	HCG	6	3	1	继发不孕	2.59	≤24	19.5	女方因素	3	5.11	887	1.06	6	14.81	5	64	2	12	4.4	A	IVF	1	0	1	0	0	0	0	否	否	全胚冷冻
1527	1	C00012703	邢芸	＜35	30	4	刺激方案	1	356.25	≤10天	8	≤3000	2850	HCG	3	1	1	继发不孕	2.76	≤24	21.5	男方因素	3	3.86	804	1.19	3	7.55	5	40	1	12	0.62	B	ICSI	2	0	1	0	0	0	0	否	否	全胚冷冻
114	1	2016110100	钟爱民	≥35	43	1	降调节方案	3	300	＞10天	12	＞3000	3600	HCG	2	0	0	继发不孕	1.07	≤24	19.1	女方因素	9	1.03	1686	0.8	9	6.99	5.01	68	4	9	10.7	A	IVF	2	0	2	1	2	2	0	否	是	移植	未妊娠
332	0	C00018270	郭爽爽	＜35	33	1	降调节方案	3	195	≤10天	10	≤3000	1950	HCG	2	0	0	原发不孕	1.58	＞24	25.2	女方因素	7	3.79	2036.82	0.77	5	5.73	5.01	36.43	1	8	10.2	A	IVF	4	0	2	1	2	2	0	否	是	移植	未妊娠
438	1	2018030180	刘秋霞	≥35	39	1	降调节方案	3	422.727	＞10天	11	＞3000	4650	HCG	1	2	0	继发不孕	0.93	＞24	29.6	女方因素	6	0.52	472	0.42	1	7.64	5.01	65.42	4	7	0.93	C	IVF	1	0	1	1	1	1	0	否	是	移植	未妊娠
522	0	C00010744	许凤梅	＜35	31	1	降调节方案	3	279.545	＞10天	11	＞3000	3075	HCG	2	0	0	原发不孕	2.01	＞24	27.3	女方因素	6	0.76	2216	0.62	7	7.86	5.01	24	1	32	0.87	B	IVF	2	0	2	0	2	2	0	否	是	移植	未妊娠
1383	1	C00004677	刘秋霞	≥35	40	2	刺激方案	1	305.357	＞10天	14	＞3000	4275	HCG	1	2	0	继发不孕	2.12	＞24	29.6	女方因素	3	1.33	302	1.94	1	7.64	5.01	35.42	2	7	1	A-B	IVF	0	0	0	0	0	0	0	是		无可移植胚胎
1738	1	C00013714	杨维华	≥35	48	1	拮抗剂方案	2	375	≤10天	7	≤3000	2625	HCG	1	1	1	继发不孕	0.11	≤24	22.2	女方因素	2	8.26	658	0.42	1	18.78	5.01	83.77	4	3	5.9	B	IVF	0	0	0	0	0	0	0	是		无可移植胚胎
867	0	2016050022	张芳	＜35	29	1	降调节方案	3	245.455	＞10天	11	≤3000	2700	HCG	1	4	0	继发不孕	2.71	≤24	20.9	女方因素	5	0.37	1203	1.45	4	6.79	5.02	31.76	1	10	10.6	A	IVF	2	0	2	1	2	2	0	否	是	移植	已妊娠	临床妊娠	宫内妊娠	双胎宫内妊娠
2191	0	C00017982	丁彦玲	≥35	51	4	刺激方案	1	225	≤10天	5	≤3000	1125	HCG	4	1	1	继发不孕	0.24	＞24	25.3	混合因素	1	14.26	280	3.51		17.26	5.02	14	4	2	11.8	B		0	0	0	0	0	0	0	是		未取卵
26	0	2016070024	杨学娟	＜35	30	1	降调节方案	3	204.545	＞10天	11	≤3000	2250	HCG	6	0	0	原发不孕	2.13	≤24	20.9	混合因素	10	3.37	1641	0.87	9	5.72	5.03	99.86	1	11			ICSI	6	0	4	1	2	2	0	否	是	移植	未妊娠
70	1	2018070108	任玉娟	≥35	38	1	刺激方案	1	322.5	≤10天	10	＞3000	3225	HCG	6	2	0	继发不孕	1.96	＞24	24.6	女方因素	7	12.37	2158	1.98	5	10.26	5.03	46.43	2	10	4.2	B	IVF	5	0	5	4	0	0	0	否	否	全胚冷冻
891	0	C00004056	孙青	＜35	28	1	降调节方案	3	242.308	＞10天	13	＞3000	3150	HCG	3	0	0	原发不孕	3.87	≤24	22.3	混合因素	5	1.48	1066	0.98	2	7.91	5.03	21.47	1	16	10.6	A	ICSI	1	0	1	0	1	1	0	否	是	移植	未妊娠
1030	0	2016060187	张倩	＜35	24	1	刺激方案	1	225	≤10天	10	≤3000	2250	HCG	4	0	0	原发不孕	1.34	＞24	24.8	女方因素	4	0.51	1143	3.87	3	7.33	5.03	46	1	8	17	B	IVF	0	0	0	0	0	0	0	是		未受精
1201	1	2016090254	张倩	＜35	24	2	刺激方案	1	407.143	＞10天	14	＞3000	5700	HCG	4	0	0	原发不孕	2.340	＞24	24.8	混合因素	4	4.27	1047	1.42	3	7.33	5.03	46	1	8	11	A	ICSI	1	0	0	0	0	0	0	是		无可移植胚胎
1699	1	2016100143	李如香	≥35	41	2	刺激方案	1	450	≤10天	9	＞3000	4050	HCG	8	1	1	继发不孕	0.19	＞24	24.8	女方因素	2	0.99	755	3.24	2	10.57	5.03	83.77	4	4	9	B	IVF	1	0	1	0	0	0	0	否	否	全胚冷冻
2162	0	2016040171	李如香	≥35	40	1	拮抗剂方案	2	182.143	≤10天	7	≤3000	1275	HCG	8	1	1	继发不孕	0.61	＞24	24.8	混合因素	1	18.64	339	0.61		10.57	5.03	44.98	4	4	8	A-B		0	0	0	0	0	0	0	是		未取卵
358	0	C00017455	吴晓燕	≥35	37	2	拮抗剂方案	2	225	≤10天	9	≤3000	2025	HCG	1	3	0	继发不孕	1.85	≤24	18.8	混合因素	7	3.1	1819	1.06	6	7.16	5.04	44	2	11	13.3	A	ICSI	4	0	4	1	0	0	0	否	否	全胚冷冻
905	0	C00010999	刘衍兰	≥35	37	2	拮抗剂方案	2	202.5	≤10天	10	≤3000	2025	双扳机	3	0	0	原发不孕	0.89	≤24	22.4	女方因素	5	0.75	1209	1.23	5	16.72	5.04	11	4	6	11.2	A	IVF	1	0	0	0	0	0	0	是		无可移植胚胎
1109	1	C00003620	曹丽伟	≥35	37	1	拮抗剂方案	2	344.231	＞10天	13	＞3000	4475	HCG	1	0	0	原发不孕	1.24	≤24	23.4	混合因素	4	2.04	1407	0.76	3	10.42	5.04	40.7	2	6	15	A	ICSI	3	0	2	0	0	0	0	否	否	全胚冷冻
1211	0	C00012745	刘衍兰	≥35	38	3	刺激方案	1	195	≤10天	10	≤3000	1950	HCG	4	0	0	原发不孕	0.88	≤24	22.4	女方因素	4	1.69	1178	0.54	4	16.72	5.04	11	4	6			IVF	3	0	0	0	0	0	0	是		无可移植胚胎
515	0	2017010098	宗军燕	≥35	39	1	刺激方案	1	225	≤10天	10	≤3000	2250	HCG	1	1	1	继发不孕	1.78	≤24	21.9	女方因素	6	1.72	2291	1.36	6	8.27	5.05	73.4	2	15	15.7	B	IVF	3	0	2	0	2	2	0	否	是	移植	未妊娠
672	1	C00011786	毕志娜	＜35	33	1	刺激方案	1	300	≤10天	9	≤3000	2700	HCG	3	2	0	继发不孕	1.5	≤24	20.8	女方因素	5	13.67	1877	1.2	5	10.73	5.05	42	1	10	0.65	B	IVF	5	0	4	1	0	0	0	否	否	全胚冷冻
1746	0	2016070058	亓建玲	≥35	45	1	刺激方案	1	262.5	≤10天	4	≤3000	1050	HCG	1	2	1	继发不孕	0.450	≤24	23.8	女方因素	2	21.48	636	0.66	0	10.73	5.05	42	4	2	6.8	B		0	0	0	0	0	0	0	是		未取到卵
2029	0	2017080083	熊巩莹	＜35	27	3	刺激方案	1	150	＞10天	11	≤3000	1650	HCG	4	1	0	继发不孕	0.39	＞24	27.1	女方因素	1	34.98	718	1.17	0	14.28	5.05	65	3	5	5.1	B		0	0	0	0	0	0	0	是		未取到卵
228	0	2016060102	丁莎	＜35	30	1	降调节方案	3	150	＞10天	12	≤3000	1800	HCG	3	0	0	原发不孕	3.2	≤24	22	女方因素	8	1.17	1416	0.97	7	9.13	5.06	65.69	1	10	10.4	A-B	IVF	5	0	4	2	2	2	0	否	是	移植	已妊娠	临床妊娠	宫内妊娠	单胎宫内妊娠
668	0	2016110152	王福秀	≥35	41	1	降调节方案	3	225	≤10天	6	≤3000	1350	HCG	1	4	1	继发不孕	1.54	≤24	20.2	混合因素	5	10.11	1415	0.59	7	10.82	5.06	46.43	2	22	8.9	A	ICSI	3	0	4	0	2	2	0	否	是	移植	已妊娠	临床妊娠	宫内妊娠	单胚胎停
98	0	2017080071	代倩倩	＜35	28	1	降调节方案	3	225	＞10天	14	＞3000	3150	HCG	2	0	0	原发不孕	3.29	≤24	22.9	混合因素	9	4.49	1936	1.73	9	9.49	5.07	36.43	1	16	11.5	A	ICSI	5	0	2	0	0	0	0	否	否	全胚冷冻
440	0	2018020102	代倩倩	＜35	29	2	降调节方案	3	275	＞10天	12	＞3000	3300	HCG	2	0	0	原发不孕	2.6	≤24	22.9	男方因素	6	1.71	1729	1.51	7	9.49	5.07	36.43	1	16	14.7	A	ICSI	6	0	3	1	0	0	0	否	否	全胚冷冻
782	0	C00003804	戚相华	≥35	43	1	拮抗剂方案	2	268.75	＞10天	12	＞3000	3225	双扳机	1	2	2	继发不孕	0.5	＞24	25.4	女方因素	5	2.86	1736	0.54	4	15.05	5.07	46.81	4	5	11.3	A-B	IVF	2	0	2	0	0	0	0	否	否	全胚冷冻
935	1	C00018863	张真	＜35	32	1	拮抗剂方案	2	354.545	＞10天	11	＞3000	3900	HCG	1	1	0	继发不孕	1.52	≤24	22.2	女方因素	4	0.31	836.18	0.66	4	6.14	5.07	35.37	1	11	9.8	B	IVF	2	0	2	1	0	0	0	否	否	全胚冷冻
1540	0	C00007398	戚相华	≥35	44	2	拮抗剂方案	2	225	≤10天	4	≤3000	900	双扳机	1	2	2	继发不孕	0.548	＞24	25.4	混合因素	3	7.73	1175	0.25	3	15.05	5.07	77	4	5	9	A	ICSI	0	0	0	0	0	0	0	是		无可移植胚胎
1743	0	C00008797	陈子凤	≥35	45	2	刺激方案	1	193.75	＞10天	12	≤3000	2325	HCG	2	3	1	继发不孕	0.51	＞24	28.3	混合因素	2	18.12	643	1.19	2	18.62	5.07	49	4	4	6.2	B-C	ICSI	2	0	0	0	0	0	0	是		无可移植胚胎
2039	1	C00010616	戚相华	≥35	44	4	降调节方案	3	312.5	≤10天	6	≤3000	1875	HCG	1	2	2	继发不孕	0.67	＞24	25.4	女方因素	1	3.5	674	0.42	2	15.05	5.07	46	4	5	9.6	A-B	IVF	1	0	1	0	0	0	0	否	否	全胚冷冻
2084	1	C00007161	陈子凤	≥35	45	1	拮抗剂方案	2	375	≤10天	8	≤3000	3000	HCG	2	3	1	继发不孕	0.38	＞24	28.3	混合因素	1	13.42	508	0.82	3	18.62	5.07	49	4	5	7.2	A	ICSI	3	0	2	1	2	2	0	否	是	移植	未妊娠
2122	1	C00009169	戚相华	≥35	44	3	刺激方案	1	300	≤10天	7	≤3000	2100	HCG	1	2	2	继发不孕	0.36	＞24	25.4	混合因素	1	10.64	430	0.16	2	15.05	5.07	26	4	5	7.5	A	ICSI	2	0	1	0	1	1	0	否	是	移植	未妊娠
729	0	2017080224	张文文	＜35	28	1	降调节方案	3	217.5	≤10天	10	≤3000	2175	HCG	3	2	0	继发不孕	2.29	≤24	19.6	女方因素	5	2.69	1512	0.87	6	10.71	5.08	79.82	1	13	15.5	A-B	IVF	6	0	4	2	2	2	0	否	是	移植	已妊娠	临床妊娠	宫内妊娠	单胎宫内妊娠
1241	1	C00018004	黄静华	≥35	41	1	拮抗剂方案	2	350	≤10天	7	≤3000	2450	HCG	7	2	1	继发不孕	1.77	≤24	20.9	男方因素	3	5.18	934.4	0.456	4	12.68	5.08	40	2	12	10.9	A-B	ICSI	1	0	0	0	0	0	0	是		无可移植胚胎
2046	1	2017060158	宋红丽	≥35	46	3	拮抗剂方案	2	300	≤10天	9	≤3000	2700	HCG	2	3	1	继发不孕	0.80	≤24	20.8	混合因素	1	1.83	657	0.57	0	18.5	5.08	73.4	4	3	5.8	A		0	0	0	0	0	0	0	是		未取到卵
862	1	C00010529	廖淑芳	≥35	43	2	刺激方案	1	431.25	＞10天	12	＞3000	5175	HCG	3	1	1	继发不孕	0.26	＞24	30.4	女方因素	5	3.72	1251	0.95	3	6.54	5.09	47	4	8	0.65	B	IVF	2	0	1	1	0	0	0	否	否	全胚冷冻
1116	0	C00007561	廖淑芳	≥35	43	1	刺激方案	1	287.5	＞10天	12	＞3000	3450	HCG	3	1	1	继发不孕	1.2	＞24	30.4	女方因素	4	4.52	1390	0.67	5	6.54	5.09	47	2	8	0.68	B-C	IVF	2	0	2	1	0	0	0	否	否	全胚冷冻
1236	1	C00011956	廖淑芳	≥35	44	3	刺激方案	1	300	＞10天	11	＞3000	3300	HCG	3	1	1	继发不孕	0.29	＞24	30.4	女方因素	3	6.88	946	0.8	2	6.54	5.09	47	4	5	0.53	B-C	IVF	0	0	1	0	0	0	0	否	否	全胚冷冻
1789	0	2016040238	王增苓	≥35	43	1	刺激方案	1	160.714	≤10天	7	≤3000	1125	HCG	12	2	1	继发不孕	0.56	＞24	29.3	女方因素	2	2.29	560	0.3	1	10.38	5.09	55.42	4	7	8.4	A	IVF	0	0	0	0	0	0	0	是		未受精
95	0	2016010146	郝雅彬	＜35	33	1	降调节方案	3	200	≤10天	7	≤3000	1400	HCG	2	2	0	继发不孕	2.29	≤24	21.4	女方因素	9	13.02	1944	1.3	4	5.54	5.1	49.09	1	14	9	A	IVF	3	0	2	0	2	2	0	否	是	移植	未妊娠
140	0	2016120165	李贞	≥35	38	1	刺激方案	1	200	≤10天	9	≤3000	1800	HCG	8	0	0	原发不孕	2.8	≤24	22.6	混合因素	8	1.78	2290	1.16	6	6.67	5.1	49	2	11	10	A-B	ICSI	5	0	2	0	2	2	0	否	是	移植	未妊娠
317	0	C00008493	刘传英	≥35	40	1	降调节方案	3	225	≤10天	10	≤3000	2250	HCG	5	2	1	继发不孕	1.86	≤24	19.5	女方因素	7	1.06	2188	0.97	8	7.32	5.1	27.83	2	16	0.81	A	IVF	4	0	2	0	2	2	0	否	是	移植	未妊娠
689	1	C00018167	李冬雪	＜35	29	2	刺激方案	1	300	≤10天	8	≤3000	2400	HCG	2	0	0	原发不孕	2.33	≤24	21.5	男方因素	5	10.54	1771	2.47	6	7.6	5.1	46.98	1	15	0.64	A	ICSI	3	0	2	0	0	0	0	否	否	全胚冷冻
755	1	C00012570	邵会会	≥35	37	1	拮抗剂方案	2	340.385	＞10天	13	＞3000	4425	HCG	3	2	1	继发不孕	2.86	＞24	25.2	女方因素	5	3.25	1363	1.29	6	11.18	5.1	39	2	12	11.8	A	IVF	4	0	4	4	2	2	0	否	是	移植	已妊娠	临床妊娠	宫内妊娠	单胚胎停
952	1	C00017583	张柳柳	＜35	27	1	降调节方案	3	300	≤10天	9	≤3000	2700	HCG	1	1	0	继发不孕	2.42	≤24	20.2	女方因素	4	0.17	685	1.31	5	8.69	5.1	27	1	15	12	A	IVF	5	0	1	1	1	1	0	否	是	移植	已妊娠	临床妊娠	宫内妊娠	单胎宫内妊娠
1145	1	2017020131	张晓云	≥35	42	1	刺激方案	1	370.588	＞10天	17	＞3000	6300	HCG	3	2	1	继发不孕	0.85	＞24	24.4	女方因素	4	5.28	1297	0.79	2	14.91	5.1	53.77	4	3	7.1	A	IVF	0	0	0	0	0	0	0	是		未受精
176	0	2016080187	马娜娜	＜35	31	2	降调节方案	3	277.5	≤10天	10	≤3000	2775	HCG	2	2	0	继发不孕	1.27	≤24	20	女方因素	8	0.58	2383	1.91	8	6.06	5.11	51	1	11	14	B	IVF	7	0	3	1	0	0	0	否	否	全胚冷冻
345	0	C00018353	王靖	≥35	39	1	拮抗剂方案	2	275	≤10天	8	≤3000	2200	HCG	1	0	0	原发不孕	1.92	≤24	22	女方因素	7	10.03	1872.97	1.29	6	12.08	5.11	77.62	2	10	9.2	A	IVF	3	0	0	0	0	0	0	是		无可移植胚胎
96	0	2017060274	齐雯雯	＜35	31	1	降调节方案	3	248.214	＞10天	21	＞3000	5212.5	HCG	4	0	0	原发不孕	2.26	≤24	22.2	女方因素	9	1.65	1936	0.56	9	7.07	5.12	49	1	31	10	B	IVF	3	0	2	1	0	0	0	否	否	全胚冷冻
589	1	C00018127	陈娟	≥35	36	2	拮抗剂方案	2	375	≤10天	9	＞3000	3375	HCG	4	0	0	原发不孕	1.51	≤24	20.2	男方因素	6	2.58	1581.78	0.67	4	7.14	5.12	79	2	11	13	A-B	ICSI	2	0	0	0	0	0	0	是		无可移植胚胎
2117	0	C00012724	冯艳惠	≥35	44	2	拮抗剂方案	2	150	≤10天	6	≤3000	900	HCG	3	5	1	继发不孕	0.117	＞24	24.8	混合因素	1	22.69	443	0.85	1	16.28	5.12	46	4	3	7.4	A		0	0	0	0	0	0	0	是		未行授精
51	1	C00015149	李金妍	＜35	29	1	拮抗剂方案	2	300	≤10天	7	≤3000	2100	HCG	2	0	0	原发不孕	1.38	≤24	22.6	女方因素	9	7.19	2983	1.2	9	8.32	5.13	39	1	18	9.3	A	IVF	5	0	4	1	2	2	0	否	是	移植	未妊娠
777	0	C00018201	马文爽	≥35	35	2	刺激方案	1	150	＞10天	11	≤3000	1650	HCG	7	0	0	原发不孕	1.2	≤24	18.7	混合因素	5	1.34	1771	0.68	2	7.23	5.13	69.09	2	5	10.2	A-B	ICSI	1	0	1	0	0	0	0	否	否	全胚冷冻
810	1	C00004759	王传香	≥35	45	2	拮抗剂方案	2	300	＞10天	14	＞3000	4200	双扳机	6	2	1	继发不孕	1.02	≤24	24	女方因素	5	3.5	1561	0.66	5	10.7	5.13	66	4	9	9	A	IVF	2	0	0	0	0	0	0	是		无可移植胚胎
819	0	2017080207	王传香	≥35	44	1	刺激方案	1	276.923	＞10天	13	＞3000	3600	HCG	6	2	1	继发不孕	0.32	≤24	24	女方因素	5	0.77	1503	0.34	7	10.7	5.13	66	4	9	10	A	IVF	4	0	1	0	1	1	0	否	是	移植	未妊娠
856	0	2017080217	颜红	＜35	27	3	降调节方案	3	150	＞10天	12	≤3000	1800	HCG	2	0	0	原发不孕	1.86	＞24	25.3	混合因素	5	0.69	1285	0.58	4	7.67	5.13	34.67	1	7	12.3	A	ICSI	4	0	2	0	2	2	0	否	是	移植	已妊娠	临床妊娠	宫内妊娠	单胎宫内妊娠
1205	1	C00018942	杨青艳	＜35	32	1	拮抗剂方案	2	300	≤10天	9	≤3000	2700	HCG	3	0	0	继发不孕	1.05	＞24	29.3	女方因素	4	2.65	1021.29	1.26	4	17.63	5.13	39.21	3	7	14.4	B	IVF	3	0	3	1	2	2	0	否	是	移植	已妊娠	临床妊娠	宫内妊娠	单胎宫内妊娠
2086	0	C00017938	马文爽	≥35	35	1	刺激方案	1	150	＞10天	11	≤3000	1650	HCG	7	0	0	原发不孕	1.2	≤24	18.7	混合因素	1	3.67	502	0.49	1	7.23	5.13	69.09	2	5	7.5	B	ICSI	1	0	1	0	0	0	0	否	否	全胚冷冻
42	1	C00007900	张豪丽	＜35	29	1	降调节方案	3	317.308	＞10天	13	＞3000	4125	HCG	4	0	0	原发不孕	1.9	≤24	20	女方因素	9	3.59	2208	1.14	7	4.89	5.14	49	1	9	1.11	A	IVF	6	0	2	0	2	2	0	否	是	移植	未妊娠
334	1	C00012589	李倩	＜35	34	2	降调节方案	3	302.5	≤10天	10	＞3000	3025	HCG	6	0	0	原发不孕	2.345	≤24	18.6	混合因素	7	2.07	2011	1.21	6	7.26	5.14	46	1	14	9.5	A	ICSI	5	0	3	3	2	2	0	否	是	移植	已妊娠	临床妊娠	宫内妊娠	双胎宫内妊娠
356	1	C00016799	张莹莹	≥35	39	1	拮抗剂方案	2	354.545	＞10天	11	＞3000	3900	HCG	6	1	0	继发不孕	1.84	＞24	33.5	女方因素	7	2.91	1823	1.87	5	5.84	5.14	36	2	9	14.4	A-B	IVF	2	0	0	0	0	0	0	是		无可移植胚胎
1408	1	C00009361	闫静	≥35	43	1	刺激方案	1	450	＞10天	11	＞3000	4950	HCG	10	3	1	继发不孕	0.42	＞24	31.7	混合因素	3	14.22	869	1.96	0	4.64	5.14	67	4	6	8	B		0	0	0	0	0	0	0	是		未取到卵
1148	0	2016080168	张伟丽	≥35	39	1	拮抗剂方案	2	247.5	≤10天	10	≤3000	2475	HCG	3	1	1	继发不孕	0.82	≤24	24	混合因素	4	6.69	1275	1	4	7.24	5.15	42.29	4	6	14.2	B	ICSI	3	0	3	1	0	0	0	否	否	全胚冷冻
1477	1	2016110165	曹洪芹	≥35	44	4	刺激方案	1	300	≤10天	7	≤3000	2100	HCG	1	2	1	继发不孕	1.28	＞24	24.4	女方因素	3	0.94	883.58	0.76	4	9.49	5.15	39.09	2	8	6.9	A	IVF	4	0	2	1	0	0	0	否	否	全胚冷冻
1573	0	2018020020	朱烨	＜35	32	1	降调节方案	3	181.25	＞10天	12	≤3000	2175	HCG	3	0	0	原发不孕	2.75	≤24	21.1	女方因素	3	9.37	1072	0.98	5	7.24	5.15	42.29	1	12	14	A	IVF	4	0	4	0	0	0	0	否	否	全胚冷冻
32	0	2018050106	沈丽丽	＜35	24	1	降调节方案	3	173.077	＞10天	13	≤3000	2250	HCG	3	0	0	原发不孕	2.47	≤24	21.5	男方因素	9	0.78	1586	1.77	8	7.48	5.16	47.71	1	16	14	A	ICSI	3	0	1	0	1	1	0	否	是	移植	已妊娠	临床妊娠	宫内妊娠	单胚胎停
521	0	C00018401	王灿灿	＜35	32	1	刺激方案	1	200	≤10天	7	≤3000	1400	HCG	3	0	0	原发不孕	1.81	≤24	19.4	男方因素	6	8.91	2234.34	1.11	7	5.76	5.17	71.94	1	14	9.8	A-B	ICSI	3	1	3	0	0	0	0	否	否	全胚冷冻
701	1	C00012239	陈雪	＜35	34	1	拮抗剂方案	2	362.5	≤10天	8	≤3000	2900	HCG	2	1	0	继发不孕	1.61	≤24	23.7	女方因素	5	6.59	1684	0.97	6	8	5.17	32	1	9	12.3	A	IVF	1	0	1	0	1	1	0	否	是	移植	已妊娠	临床妊娠	宫内妊娠	单胎宫内妊娠
2107	1	C00011408	张娟	≥35	43	1	刺激方案	1	300	＞10天	12	＞3000	3600	HCG	1	0	0	原发不孕	0.23	＞24	26.3	女方因素	1	11.26	455	0.34	1	14.84	5.18	24	4	2	0.53	B	IVF	0	0	0	0	0	0	0	是		未受精
704	1	2016110210	刘秀芳	≥35	44	1	降调节方案	3	443.75	≤10天	8	＞3000	3550	HCG	1	3	1	继发不孕	0.48	≤24	22	女方因素	5	5.97	1669	0.78	7	9.01	5.19	45	4	8	19.1	A-B	IVF	4	0	2	0	0	0	0	否	否	全胚冷冻
746	1	C00011886	陈普杰	＜35	34	1	拮抗剂方案	2	343.75	＞10天	12	＞3000	4125	HCG	4	1	1	继发不孕	1.32	≤24	20	女方因素	5	3.69	1418	1.08	4	9.31	5.19	26	1	6	0.78	A	IVF	2	0	2	0	2	2	0	否	是	移植	未妊娠
1250	1	2016090208	邢玉风	≥35	47	1	刺激方案	1	300	＞10天	11	＞3000	3300	HCG	3	6	2	继发不孕	0.58	＞24	29.3	女方因素	3	3.67	910	0.8	3	5.24	5.19	31	4	3	8.4	A	IVF	2	0	2	0	2	2	0	否	是	移植	未妊娠
1396	1	2016080199	毕春梅	≥35	39	1	刺激方案	1	375	≤10天	10	＞3000	3750	HCG	10	0	0	原发不孕	0.940	＞24	26.2	女方因素	3	3.34	891.83	0.93	4	14.08	5.19	76.43	4	7	9.7	B	IVF	3	0	3	1	2	2	0	否	是	移植	已妊娠	临床妊娠	宫内妊娠	双胎宫内妊娠
1541	1	C00012825	陈普杰	＜35	34	2	拮抗剂方案	2	318.75	＞10天	12	＞3000	3825	HCG	4	1	1	继发不孕	1.61	≤24	20	混合因素	3	0.65	1173	1.38	4	9.31	5.19	26	1	6	8.7	A	ICSI	3	0	3	0	2	2	0	否	是	移植	未妊娠
1892	0	2016050193	白秀兰	≥35	39	2	刺激方案	1	150	≤10天	7	≤3000	1050	HCG	8	2	1	继发不孕	0.56	≤24	18.7	混合因素	2	18.41	199	2.02		9.01	5.19	45	4	4	10.4	B		0	0	0	0	0	0	0	是		未取卵
348	0	C00005964	毛文静	＜35	31	1	降调节方案	3	181.25	＞10天	12	≤3000	2175	HCG	3	0	0	原发不孕	2.75	≤24	19.8	女方因素	7	1.3	1860	1.52	7	8.25	5.2	37	1	12	1.33	A	IVF	6	0	2	1	2	2	0	否	是	移植	已妊娠	临床妊娠	宫内妊娠	双胎宫内妊娠
533	1	2018050145	张慧敏	＜35	33	1	降调节方案	3	419.118	＞10天	17	＞3000	7125	HCG	3	0	0	原发不孕	2.42	≤24	19.5	不明原因	6	2.48	2084	0.99	6	5.19	5.2	53.77	1	9	13.6	A-B	IVF	6	0	3	0	0	0	0	否	否	全胚冷冻
706	0	C00004417	赵茹	＜35	27	1	降调节方案	3	218.182	＞10天	11	≤3000	2400	HCG	1	0	0	原发不孕	1.46	≤24	17.1	女方因素	5	1.57	1666	1.44	5	13.28	5.2	60	1	8	13.2	A	IVF	4	0	4	2	2	2	0	否	是	移植	未妊娠
1975	1	C00012531	田金花	≥35	41	3	刺激方案	1	300	＞10天	12	＞3000	3600	HCG	5	2	0	继发不孕	2.26	≤24	21.4	不明原因	2	7.41	435	0.93	3	9.19	5.2	76.43	2	6	0.9	B-C	IVF	0	0	0	0	0	0	0	是		无可移植胚胎
327	0	2017030147	岳甜甜	＜35	29	1	降调节方案	3	262.5	＞10天	14	＞3000	3675	HCG	1	3	0	继发不孕	2.3	＞24	25.6	女方因素	7	2.19	2120	0.57	4	11.34	5.21	27	1	9	12.3	A	IVF	4	0	4	1	2	2	0	否	是	移植	已妊娠	临床妊娠	宫内妊娠	单胚胎停
330	0	2016090010	张美荣	≥35	37	1	降调节方案	3	162.5	＞10天	12	≤3000	1950	HCG	6	3	2	继发不孕	1.97	＞24	28.5	女方因素	9	0.88	2608	0.76	9	7.45	5.21	86.43	2	15	15.4	A	IVF	8	0	6	2	2	2	0	否	是	移植	未妊娠
900	0	C00007101	刘红苓	＜35	29	1	降调节方案	3	253.125	≤10天	8	≤3000	2025	HCG	3	0	0	原发不孕	13.7	≤24	21.3	男方因素	5	6.99	1037	1.21	4	4.56	5.21	36	1	8	8.9	B-C	IVF	0	0	0	0	0	0	0	是		无可移植胚胎
1192	0	C00008438	刘红苓	＜35	29	2	拮抗剂方案	2	253.125	≤10天	8	≤3000	2025	HCG	3	0	0	原发不孕	2.48	≤24	21.3	男方因素	4	8.75	1090	1.13	3	4.56	5.21	36	1	8	11	C	ICSI	1	0	1	0	0	0	0	否	否	全胚冷冻
884	0	2017100184	宋焕焕	＜35	31	4	降调节方案	3	197.727	＞10天	11	≤3000	2175	HCG	1	3	0	继发不孕	1.09	≤24	20.7	女方因素	5	1.05	1108	0.64	4	9.76	5.22	80.74	3	5	16.2	A	IVF	4	0	4	3	0	0	0	否	否	全胚冷冻
928	0	2017050047	李菁菁	＜35	30	2	降调节方案	3	262.5	≤10天	8	≤3000	2100	HCG	2	2	1	继发不孕	1.72	＞24	25.3	女方因素	4	1.82	877	0.84	3	5.21	5.22	56.43	1	10	11.3	C	IVF	2	0	2	1	2	2	0	否	是	移植	已妊娠	临床妊娠	宫内妊娠	单胎宫内妊娠
1780	1	C00012345	潘健健	≥35	36	1	拮抗剂方案	2	391.667	＞10天	12	＞3000	4700	HCG	6	0	0	原发不孕	1.25	≤24	21.4	混合因素	2	9.91	582	1.78	1	9.51	5.22	39.09	2	5	12	A	ICSI	1	0	1	1	0	0	0	否	否	全胚冷冻
1933	0	2016060141	宋焕焕	＜35	30	3	拮抗剂方案	2	225	≤10天	5	≤3000	1125	HCG	1	2	0	继发不孕	0.44	≤24	20.7	女方因素	2	17.55	435	0.47	2	9.76	5.22	80.74	3	5	14	A	IVF	2	0	2	1	2	2	0	否	是	移植	已妊娠	临床妊娠	宫内妊娠	单胚胎停
2265	0	2016050054	李菁菁	＜35	29	1	降调节方案	3	225	≤10天	10	≤3000	2250	HCG	2	2	1	继发不孕	2.06	＞24	25.3	女方因素	4	35.37	923	0.88	4	5.21	5.22	56.43	1	10			IVF	3	0	2	1	2	2	0	否	是	移植	已妊娠	临床妊娠	宫外妊娠	异位妊娠
91	0	2017080031	卢娜	＜35	27	1	降调节方案	3	218.75	＞10天	12	≤3000	2625	HCG	5	0	0	原发不孕	2.19	≤24	23.4	女方因素	9	5.9	2046	1.91	9	7.64	5.23	59.09	1	18	11.5	A	IVF	6	0	3	0	0	0	0	否	否	全胚冷冻
331	0	2017100171	曹德红	≥35	37	1	降调节方案	3	170.455	＞10天	11	≤3000	1875	HCG	6	1	1	继发不孕	1.89	≤24	22.6	混合因素	7	1.27	2038	0.71	8	6.89	5.25	49	2	12	15.7	A	ICSI	5	0	2	0	2	2	0	否	是	移植	未妊娠
830	0	C00005387	周云霞	≥35	42	1	拮抗剂方案	2	211.364	＞10天	11	≤3000	2325	双扳机	2	4	1	继发不孕	1.51	≤24	22.3	混合因素	5	2.89	1437	0.62	5	7.11	5.25	45	2	8	8.7	A	ICSI	4	0	2	1	2	2	0	否	是	移植	未妊娠
954	1	C00017190	郝芸	＜35	34	1	刺激方案	1	450	＞10天	11	＞3000	4950	HCG	1	0	0	原发不孕	2.61	≤24	21.5	女方因素	4	6.99	673	1.21	3	6.7	5.25	61	1	7	5.4	A	IVF	2	1	2	0	0	0	0	否	否	全胚冷冻
1179	1	C00013268	吕桂霞	≥35	38	1	拮抗剂方案	2	348.214	＞10天	14	＞3000	4875	HCG	4	3	1	继发不孕	1.62	≤24	21.3	女方因素	4	1.32	1130	1.12	8	14.87	5.25	23	2	11	10	A	IVF	5	0	2	0	2	2	0	否	是	移植	未妊娠
1636	1	C00016425	吕桂霞	≥35	39	2	降调节方案	3	328.846	＞10天	13	＞3000	4275	HCG	4	3	1	继发不孕	0.28	≤24	21.3	女方因素	2	1.1	896	0.23	3	14.87	5.25	23	4	7	9.1	B	IVF	1	0	1	0	1	1	0	否	是	移植	未妊娠
1824	1	C00019392	郝芸	≥35	35	2	刺激方案	1	450	＞10天	11	＞3000	4950	HCG	1	0	0	原发不孕	1.29	≤24	21.5	女方因素	2	5.16	503.17	0.74	3	6.7	5.25	61	2	7	6.1	B	IVF	0	0	0	0	0	0	0	是		无可移植胚胎
399	0	2017030308	杨晶莎	＜35	27	1	降调节方案	3	257.143	＞10天	14	＞3000	3600	HCG	1	2	0	继发不孕	2.30	＞24	32.3	女方因素	7	1.28	1344	1.16	8	8.41	5.26	42	1	15	15.2	A-B	IVF	6	0	2	1	2	2	0	否	是	移植	未妊娠
1168	0	C00008002	李焕苓	≥35	35	1	降调节方案	3	246.429	＞10天	14	＞3000	3450	HCG	5	1	1	继发不孕	1.80	≤24	22.6	女方因素	4	4.05	1194	0.53	4	8.41	5.26	42	2	7	1.69	A	IVF	2	0	2	0	0	0	0	否	否	全胚冷冻
1510	0	C00011013	李焕苓	≥35	36	2	刺激方案	1	150	≤10天	6	≤3000	900	HCG	5	1	1	继发不孕	1.89	≤24	22.6	女方因素	3	17.54	886	0.51	3	8.41	5.26	42	2	5	1.08	A	IVF	1	0	2	0	0	0	0	否	否	全胚冷冻
1585	1	2017040155	侯东红	≥35	44	2	拮抗剂方案	2	400	≤10天	5	≤3000	2000	HCG	1	4	1	继发不孕	0.28	＞24	24.2	混合因素	3	12.29	1038	0.64	3	7.43	5.26	38	4	5	8.1	A	ICSI	2	0	2	2	0	0	0	否	否	全胚冷冻
1973	1	2017030303	侯东红	≥35	44	1	拮抗剂方案	2	325	≤10天	8	≤3000	2600	双扳机	1	4	1	继发不孕	0.78	＞24	24.2	混合因素	2	22.81	444.65	0.35		7.43	5.26	39.5	4	5	8.8	A-B		0	0	0	0	0	0	0	是		未取卵
2030	0	2017110044	刘春	≥35	45	1	降调节方案	3	250	≤10天	10	≤3000	2500	HCG	3	3	1	继发不孕	0.23	≤24	23.6	不明原因	1	6.78	716	1.22	1	17.41	5.26	42	4	3	7		ICSI	1	0	1	0	0	0	0	否	否	全胚冷冻
2097	1	2017050126	侯东红	≥35	44	3	降调节方案	3	325	≤10天	5	≤3000	1625	HCG	1	4	1	继发不孕	0.55	＞24	24.2	混合因素	1	10.566	473	0.62	1	7.43	5.26	39.5	4	5	8.2	A-B	ICSI	0	0	0	0	0	0	0	是		未受精
316	1	C00009141	田雪莲	≥35	40	1	刺激方案	1	450	≤10天	10	＞3000	4500	HCG	2	1	1	继发不孕	1.9	≤24	18.8	女方因素	7	7.09	2215	1.76	7	6.83	5.27	58.71	2	14	0.75	B	IVF	2	2	2	0	0	0	0	否	否	全胚冷冻
1002	1	C00017830	程雅萍	≥35	39	1	刺激方案	1	450	≤10天	10	＞3000	4500	HCG	10	0	0	原发不孕	2.43	＞24	28.7	男方因素	4	9.46	1269	1.39	5	9.66	5.27	39.17	2	10	0.46	A	ICSI	5	0	4	2	0	0	0	否	否	全胚冷冻
170	0	2018060191	程花	≥35	35	2	降调节方案	3	130	＞10天	20	≤3000	2600	HCG	3	3	1	继发不孕	1.64	≤24	23.1	男方因素	8	2.65	2534	1.1	9	11.62	5.28	65.69	2	18	10.2	A	ICSI	6	0	4	0	2	2	0	否	是	移植	未妊娠
259	1	2017020046	刘正香	≥35	44	2	刺激方案	1	307.5	≤10天	10	＞3000	3075	HCG	3	5	0	继发不孕	0.39	＞24	26.6	女方因素	7	0.99	2609	0.95	6	7.78	5.28	57.62	4	10	9.3	A	IVF	2	0	1	0	1	1	0	否	是	移植	未妊娠
535	1	2016080215	刘正香	≥35	43	1	刺激方案	1	356.25	≤10天	8	≤3000	2850	HCG		0	0	继发不孕	1.80	＞24	26.6	女方因素	6	1.5	2060	3.51	8	7.78	5.28	57.62	2	10	12	B	IVF	2	0	2	0	0	0	0	否	否	全胚冷冻
960	1	C00018429	白红霞	≥35	35	1	刺激方案	1	310.714	＞10天	14	＞3000	4350	HCG	9	0	0	原发不孕	1.06	≤24	20.4	女方因素	4	14.89	489.95	0.95	2	9.88	5.28	15.21	4	7	5.3	A-B	IVF	1	0	0	0	0	0	0	是		无可移植胚胎
961	1	2017110036	佟贞秀	≥35	42	1	拮抗剂方案	2	337.5	≤10天	10	＞3000	3375	HCG	2	2	1	继发不孕	0.18	≤24	20.1	混合因素	4	3.08	434	3.13	0	15.63	5.28	89.45	4	3	8.4	A-B		0	0	0	0	0	0	0	是		未取到卵
1052	0	C00012819	王小凤	≥35	38	1	拮抗剂方案	2	281.25	≤10天	8	≤3000	2250	双扳机	3	3	1	继发不孕	2.21	≤24	22.1	女方因素	4	9.53	1734	0.67	4	11.06	5.28	68	2	7	8.5	B	IVF	1	0	1	0	0	0	0	否	否	全胚冷冻
1401	1	2017090242	刘正香	≥35	44	3	刺激方案	1	375	≤10天	9	＞3000	3375	HCG	3	5	0	继发不孕	0.68	＞24	26.6	女方因素	3	15.17	883	0.62	4	7.78	5.28	57.62	4	10	6	A	IVF	1	0	1	0	0	0	0	否	否	全胚冷冻
1895	1	2018060029	刘正香	≥35	45	4	刺激方案	1	337.5	≤10天	8	≤3000	2700	HCG	3	5	0	继发不孕	0.51	＞24	26.6	不明原因	2	11.62	455	0.71	2	7.78	5.28	57.62	4	5	5.3	B	IVF	1	0	1	0	0	0	0	否	否	全胚冷冻
2250	1	C00014609	王华军	≥35	40	1	拮抗剂方案	2	325	≤10天	6	≤3000	1950	HCG	6	1	0	继发不孕	1.865	＞24	46	混合因素	1	7.41	435	0.93	3	5.17	5.28	64.07	2	15	7.7	A	ICSI	3	0	1	0	1	1	0	否	是	移植	未妊娠
141	1	2016070034	程艳娟	≥35	36	3	降调节方案	3	370.312	＞10天	16	＞3000	5925	HCG	8	2	0	继发不孕	1.74	≤24	20.2	女方因素	8	1	2261	2.36	9	7.85	5.3	37.66	2	12	8.2	A-B	IVF	2	0	2	0	0	0	0	否	否	全胚冷冻
542	0	C00015684	宋海洁	＜35	33	6	拮抗剂方案	2	200	≤10天	7	≤3000	1400	HCG	2	1	1	继发不孕	1.83	≤24	23.9	混合因素	6	6.93	2035	0.85	5	11.83	5.3	68	1	10	1.13	A	ICSI	2	0	2	0	1	2	0	否	是	移植	未妊娠
715	0	C00017058	姜欣	＜35	34	1	拮抗剂方案	2	250	≤10天	9	≤3000	2250	HCG	5	3	0	继发不孕	1.97	≤24	19.7	女方因素	5	1.52	1610	1.08	4	10.17	5.3	68	1	12	6.9	A	IVF	3	0	2	1	2	2	0	否	是	移植	未妊娠
1267	0	C00018087	宋海洁	＜35	33	7	拮抗剂方案	2	150	≤10天	8	≤3000	1200	HCG	2	1	1	继发不孕	2.85	≤24	23.9	混合因素	3	1.45	877.05	0.56	2	11.83	5.3	68	1	10	9.6	A	ICSI	1	0	1	1	1	1	0	否	是	移植	已妊娠	临床妊娠	宫内妊娠	单胎宫内妊娠
1778	1	C00013488	柳海华	≥35	39	1	拮抗剂方案	2	343.75	≤10天	8	≤3000	2750	HCG	3	5	1	继发不孕	1.36	≤24	22	混合因素	2	25.21	586	0.88		11.2	5.3	95.42	2	8	9.7	A		0	0	0	0	0	0	0	是		未取卵
306	1	C00010998	孟庆霞	≥35	44	2	刺激方案	1	300	≤10天	10	≤3000	3000	HCG	8	4	1	继发不孕	1.45	＞24	28	女方因素	7	3.65	2380	0.76	6	7.41	5.31	27.1	2	14	0.7	B	IVF	4	1	3	0	0	0	0	否	否	全胚冷冻
69	1	C00007104	苏方	≥35	36	3	降调节方案	3	391.667	≤10天	9	＞3000	3525	HCG	1	6	1	继发不孕	2.56	≤24	23	女方因素	9	1.41	2501	0.59	9	7.67	5.32	40	2	20	10.1	A	IVF	5	2	2	0	1	0	1	否	是	移植	未妊娠
354	0	2017080109	陶恒玉	＜35	30	1	降调节方案	3	177.273	＞10天	11	≤3000	1950	HCG	4	0	0	原发不孕	1.85	≤24	19.5	女方因素	7	3.96	1829	1.23	9	7.35	5.32	46.43	1	10	13.9	B	IVF	3	0	2	0	2	2	0	否	是	移植	已妊娠	临床妊娠	宫内妊娠	双胎宫内妊娠
950	1	2018060052	卓延飞	＜35	28	1	刺激方案	1	340	＞10天	15	＞3000	5100	HCG	1	1	0	继发不孕	1.42	≤24	18.4	女方因素	4	14.57	700	2.2	3	12.55	5.32	30.74	1	6	4.7	B	IVF	2	0	1	0	0	0	0	否	否	全胚冷冻
1490	1	C00003721	卓延飞	＜35	29	2	刺激方案	1	429.545	＞10天	11	＞3000	4725	HCG	1	1	0	继发不孕	1.42	≤24	18.4	女方因素	3	19.42	811	1.69	2	12.55	5.32	30.74	1	6	5	B	IVF	2	0	2	0	0	0	0	否	否	全胚冷冻
1521	0	C00012793	包振华	＜35	33	1	拮抗剂方案	2	286.364	＞10天	11	＞3000	3150	HCG	5	3	0	继发不孕	1.53	≤24	20.7	女方因素	3	3.77	831	0.47	4	8.87	5.32	51	1	6	7	A	IVF	3	0	3	0	2	2	0	否	是	移植	未妊娠
2184	0	2016030260	李钢	＜35	33	1	刺激方案	1	150	≤10天	6	≤3000	900	HCG		0	0	原发不孕	0.86	≤24	22.7	女方因素	1	14.52	295	2.12		13.45	5.32	56.34	3	4	6.2	A		0	0	0	0	0	0	0	是		未取卵
2267	1	2018050248	徐爱春	≥35	42	1	刺激方案	1	382.5	≤10天	10	＞3000	3825	HCG	5	3	1	继发不孕	0.20	≤24	21.3	混合因素	1	5.97	322	0.83	0	20.87	5.32	99.09	4	2				0	0	0	0	0	0	0	是		未取到卵
624	1	C00012219	叶丽杰	≥35	38	3	拮抗剂方案	2	342.857	≤10天	7	≤3000	2400	HCG	8	0	0	原发不孕	1.88	＞24	24.3	混合因素	6	4.85	1268	0.65	5	8.52	5.33	40.8	2	11	0.68	A	ICSI	5	0	4	0	0	0	0	否	否	全胚冷冻
1482	0	C00009329	叶丽杰	≥35	37	2	刺激方案	1	225	≤10天	10	≤3000	2250	HCG	8	0	0	原发不孕	2.32	＞24	24.3	混合因素	3	22.33	854.39	0.46	2	8.52	5.33	40.8	2	11	6.6	A	ICSI	1	0	1	0	0	0	0	否	否	全胚冷冻
1709	0	C00012868	胡静	≥35	39	3	拮抗剂方案	2	150	≤10天	8	≤3000	1200	HCG	1	2	1	继发不孕	0.19	≤24	21.3	混合因素	2	4.4	735	0.5	2	16.02	5.33	20	4	5	10.3	A	ICSI	2	0	1	0	1	2	0	否	是	移植	未妊娠
256	1	C00009425	阮洪荣	≥35	42	2	刺激方案	1	450	＞10天	11	＞3000	4950	HCG	2	0	0	原发不孕	1.09	≤24	22	女方因素	7	13.37	1676	2.2	1	14.22	5.34	32	4	6	0.62	A-B	IVF	0	0	0	0	0	0	0	是		未受精
487	0	2017010064	孟宪立	＜35	31	2	降调节方案	3	150	＞10天	11	≤3000	1650	HCG	4	0	0	原发不孕	2.0	＞24	27.2	混合因素	7	0.62	1631	0.64	8	6.65	5.34	71.12	1	14	13	A	ICSI	6	0	6	3	2	2	0	否	是	移植	已妊娠	临床妊娠	宫内妊娠	单胎宫内妊娠
576	1	2016110237	刘海燕	＜35	33	3	刺激方案	1	375	≤10天	9	＞3000	3375	HCG	4	0	0	原发不孕	1.40	＞24	29.3	女方因素	6	1.04	1684	0.91	7	6.45	5.34	51.38	1	8	12	A	IVF	0	0	0	0	0	0	0	是		未受精
761	1	2017030226	马红慧	≥35	42	1	降调节方案	3	337.5	≤10天	8	≤3000	2700	HCG	2	0	0	继发不孕	2.46	≤24	22	女方因素	5	2.9	1322	1.22	7	8.56	5.34	40	2	8	9	B	IVF	6	0	4	0	0	0	0	否	否	全胚冷冻
1317	0	2017030121	付鹏鹏	≥35	35	4	降调节方案	3	150	＞10天	12	≤3000	1800	HCG	2	2	0	继发不孕	1.25	＞24	27.1	混合因素	3	4.41	715	0.11	3	8.56	5.34	40	2	6	15.7	B	ICSI	3	0	2	0	2	2	0	否	是	移植	未妊娠
2085	0	C00017479	陈相风	≥35	42	1	刺激方案	1	243.75	≤10天	8	≤3000	1950	HCG	2	0	0	原发不孕	0.3	≤24	20.3	混合因素	1	20.7	507	1.25	2	8.95	5.34	66	4	4	7.9	B	ICSI	0	0	0	0	0	0	0	是		无可移植胚胎
2183	1	2016110264	郭海英	≥35	39	2	刺激方案	1	300	≤10天	6	≤3000	1800	HCG	2	3	1	继发不孕	0.43	＞24	24.9	女方因素	1	6.86	299	0.38	1	20.74	5.34	74	4	2	8.2	A	IVF	1	0	0	0	0	0	0	是		无可移植胚胎
2187	1	2016100068	郭海英	≥35	39	1	刺激方案	1	313.636	＞10天	11	＞3000	3450	HCG	2	3	1	继发不孕	0.43	＞24	24.9	女方因素	1	4.03	288	1.28	0	20.74	5.34	74	4	2	8.8	B		0	0	0	0	0	0	0	是		未取到卵
491	1	2016050229	马征	＜35	34	1	刺激方案	1	350	＞10天	15	＞3000	5250	HCG	5	0	0	原发不孕	2.47	≤24	20.9	女方因素	6	1.45	2563	0.87	8	6.2	5.35	47.7	1	9	10.8	B	IVF	0	0	0	0	0	0	0	是		未受精
673	1	2017030197	许祎	≥35	38	2	降调节方案	3	425	≤10天	9	＞3000	3825	HCG	8	0	0	原发不孕	1.51	＞24	25	女方因素	5	7.18	1875	0.64	0	10.29	5.35	29.6	2	5	10.5	A		0	0	0	0	0	0	0	是		未取到卵
976	0	2016090150	王茂云	≥35	40	2	降调节方案	3	265.385	＞10天	13	＞3000	3450	HCG	5	3	1	继发不孕	2.32	＞24	37.8	男方因素	4	1.74	1362	2.71	9	6.12	5.35	29	2	13	13.8	A	ICSI	2	0	1	0	1	1	0	否	是	移植	未妊娠
1830	0	2017040172	付正玲	≥35	43	1	拮抗剂方案	2	247.5	≤10天	10	≤3000	2475	HCG	3	3	2	继发不孕	0.93	＞24	27.7	女方因素	2	10.39	490	0.41	1	12.54	5.35	77.07	4	3	11.8	A	IVF	1	0	1	0	1	1	0	否	是	移植	未妊娠
21	1	C00016908	陈学双	≥35	38	1	降调节方案	3	346.154	＞10天	13	＞3000	4500	HCG	1	3	1	继发不孕	1.92	≤24	20.9	女方因素	10	2.46	2007	1.2	8	9.62	5.36	42.7	2	13	13.2	A	IVF	5	2	2	2	0	0	0	否	否	全胚冷冻
49	0	2016060219	杜军红	＜35	31	4	降调节方案	3	242.308	＞10天	13	＞3000	3150	HCG	4	0	0	原发不孕	2.11	≤24	23.4	混合因素	9	3.89	2027	0.56	7	9.62	5.36	42.7	1	16	11	B	ICSI	3	0	1	1	0	0	0	否	否	全胚冷冻
247	1	C00006926	郑文芳	≥35	44	1	拮抗剂方案	2	366.667	≤10天	9	＞3000	3300	HCG	5	0	0	原发不孕	1.7	＞24	24.1	混合因素	7	2.42	1910	1.33	6	10.67	5.36	10	2	8	10	B	ICSI	0	0	1	0	1	1	0	否	是	移植	未妊娠
1328	0	2018040016	李萍	≥35	45	2	拮抗剂方案	2	125	＞10天	24	≤3000	3000	HCG	1	2	1	继发不孕	0.73	≤24	23.4	混合因素	3	0.47	663	0.45	5	4.39	5.36	47.71	4	8	11.3	A	ICSI	1	0	2	0	0	0	0	否	否	全胚冷冻
1679	1	C00010515	郝照华	≥35	42	1	拮抗剂方案	2	300	≤10天	9	≤3000	2700	HCG	3	0	0	原发不孕	0.81	≤24	21.5	混合因素	2	5.22	801	0.32	2	11.28	5.36	57	4	4	13.2	A-B	ICSI	2	0	1	0	0	0	0	否	否	全胚冷冻
181	0	2018010189	沈云燕	≥35	36	2	降调节方案	3	268.75	＞10天	12	＞3000	3225	HCG	2	3	1	继发不孕	2.93	＞24	25.4	不明原因	8	3.68	2301	1.36	8	7.81	5.37	29.6	2	13	10	A	ICSI	3	0	1	0	0	0	0	否	否	全胚冷冻
216	0	2018060021	翟文方	＜35	32	1	降调节方案	3	285	≤10天	10	≤3000	2850	HCG	1	0	0	原发不孕	2.84	≤24	20.4	男方因素	8	0.5	1671	0.54	6	12.47	5.37	34.56	1	14	11.1	A	IVF	0	0	0	0	0	0	0	是		无可移植胚胎
509	1	2017060012	宫晓娜	≥35	40	1	拮抗剂方案	2	291.667	≤10天	9	≤3000	2625	HCG	2	3	1	继发不孕	2.05	≤24	21.1	女方因素	6	2.12	2375	0.64	7	9.09	5.37	41	2	11	12.6	A	IVF	3	0	2	2	2	2	0	否	是	移植	未妊娠
875	0	2018010120	宫晓娜	≥35	40	2	降调节方案	3	136.364	＞10天	11	≤3000	1500	HCG	2	3	1	继发不孕	1.77	≤24	21.1	混合因素	5	0.78	1172	0.89	5	9.09	5.37	41.75	2	11	11.4	A	ICSI	2	0	2	2	2	2	0	否	是	移植	未妊娠
569	0	C00010794	孙启梅	≥35	40	1	拮抗剂方案	2	159.375	≤10天	8	≤3000	1275	HCG	5	0	0	原发不孕	1.59	≤24	18	女方因素	6	1.43	1775	2.57	4	18.57	5.38	25	2	11	11	A	IVF	2	0	1	0	0	0	0	否	否	全胚冷冻
1418	1	C00017764	陆娜	＜35	31	1	降调节方案	3	342.5	≤10天	10	＞3000	3425	HCG	1	0	0	原发不孕	1.55	≤24	18.1	女方因素	3	10.64	846	1.04	4	7.73	5.38	67	1	12	11	A	IVF	4	0	2	1	2	2	0	否	是	移植	已妊娠	临床妊娠	宫内妊娠	单胚胎停
1769	0	2017110278	白永芳	≥35	47	4	刺激方案	1	150	≤10天	8	≤3000	1200	HCG	3	4	1	继发不孕	0.15	＞24	24.2	不明原因	2	8.71	601	2.48	1	18.67	5.38	36	4	4	6.6	B	IVF	1	0	1	0	0	0	0	否	否	全胚冷冻
16	1	2018040159	荣英杰	≥35	40	1	降调节方案	3	300	＞10天	11	＞3000	3300	HCG	10	2	0	继发不孕	3.35	＞24	24.1	女方因素	10	2.63	2548	0.96	9	9.29	5.39	44.98	2	14	8	A	IVF	5	0	2	0	0	0	0	否	否	全胚冷冻
18	0	2018040067	张利娟	＜35	31	1	降调节方案	3	272.727	＞10天	11	≤3000	3000	HCG	6	1	1	继发不孕	2.58	≤24	22.9	不明原因	10	1.34	2184	0.42	8	8.22	5.39	77.07	1	12	13.8	A	IVF	3	0	1	0	0	0	0	否	否	全胚冷冻
162	1	2016090221	刘娜	＜35	32	2	降调节方案	3	400	＞10天	15	＞3000	6000	HCG	3	0	0	原发不孕	2.49	＞24	25.7	女方因素	8	0.59	1762	1.24	8	6.89	5.39	26.43	1	12	20.2	B	IVF	7	0	2	0	2	2	0	否	是	移植	已妊娠	临床妊娠	宫内妊娠	单胎宫内妊娠
215	1	C00004824	曲姗姗	＜35	27	2	降调节方案	3	325	＞10天	12	＞3000	3900	HCG	6	0	0	原发不孕	3.24	≤24	20.4	女方因素	8	0.57	1678	0.78	9	6.61	5.39	35.42	1	15	1.2	A-B	IVF	3	0	2	1	2	2	0	否	是	移植	已妊娠	临床妊娠	宫内妊娠	单胎宫内妊娠
508	1	2016080084	孟丛丛	＜35	29	2	刺激方案	1	420	≤10天	10	＞3000	4200	HCG	3	0	0	原发不孕	1.33	≤24	22.5	女方因素	6	1.64	2381	1.26	9	7.53	5.39	80.74	1	10	12.9	A	IVF	6	0	2	1	2	2	0	否	是	移植	已妊娠	临床妊娠	宫内妊娠	单胚胎停
608	0	C00007080	张利娟	＜35	33	2	降调节方案	3	231.818	＞10天	11	≤3000	2550	HCG	6	1	1	继发不孕	2.05	≤24	22.9	男方因素	6	1.28	1453	0.28	6	8.22	5.39	77.07	1	12	1.36	A	ICSI	4	0	2	0	2	2	0	否	是	移植	已妊娠	临床妊娠	宫内妊娠	单胎宫内妊娠
615	1	2017090133	王国娟	＜35	29	2	刺激方案	1	375	≤10天	5	≤3000	1875	HCG	5	1	0	继发不孕	1.09	≤24	23.7	女方因素	6	12.33	1328	2.68	5	9.15	5.39	65.76	3	8	7.8	A	IVF	4	0	0	0	0	0	0	是		无可移植胚胎
752	1	2016020096	孟丛丛	＜35	28	1	降调节方案	3	356.25	＞10天	12	＞3000	4275	HCG	3	0	0	原发不孕	1.84	≤24	22.5	女方因素	5	1.05	1375	1.55	3	7.53	5.39	80.74	1	9	12.3	A	IVF	2	0	2	0	2	2	0	否	是	移植	未妊娠
1136	1	2018040156	曲姗姗	＜35	27	1	降调节方案	3	302.778	≤10天	9	≤3000	2725	HCG	6	0	0	原发不孕	3.0	≤24	20.4	不明原因	4	0.82	1318	0.76	6	6.61	5.39	35.42	1	15	11.7	A	IVF	5	0	0	0	0	0	0	是		无可移植胚胎
1426	1	2017040004	王国娟	＜35	28	1	降调节方案	3	312.5	＞10天	12	＞3000	3750	HCG	5	1	0	继发不孕	1.78	≤24	23.7	女方因素	3	2.5	969	1.31	5	9.15	5.39	56.76	1	8	13	A	IVF	3	0	0	0	0	0	0	是		无可移植胚胎
263	1	C00008831	孙蒙	＜35	31	1	降调节方案	3	300	≤10天	10	≤3000	3000	HCG	2	0	0	原发不孕	4.02	≤24	22.8	女方因素	7	3.69	1479	1.02	7	6.3	5.4	70	1	25	10.5	A	IVF	5	0	4	0	2	2	0	否	是	移植	已妊娠	临床妊娠	宫内妊娠	单胎宫内妊娠
1501	0	C00018822	薛岸欣	≥35	46	3	刺激方案	1	150	≤10天	8	≤3000	1200	HCG	2	1	0	继发不孕	0.63	≤24	21.5	女方因素	3	3.81	955	0.94	3	17.05	5.4	97.66	4	5	8.6	B	IVF	3	0	3	2	0	0	0	否	否	全胚冷冻
1759	1	C00004976	王玉萍	＜35	31	4	拮抗剂方案	2	337.5	＞10天	12	＞3000	4050	HCG	5	0	0	原发不孕	0.757	≤24	21.6	男方因素	2	22.2	611	0.84	3	4.21	5.4	66.06	3	6	10.7	A-B	ICSI	1	0	1	0	1	1	0	否	是	移植	未妊娠
792	1	2018040220	张梦琳	＜35	29	1	降调节方案	3	305.769	＞10天	13	＞3000	3975	HCG	2	2	0	继发不孕	1.24	≤24	20.2	不明原因	5	9.02	1669	0.81	3	9.42	5.41	56	1	8	10.1	A	IVF	2	0	1	0	0	0	0	否	否	全胚冷冻
419	0	C00012995	宋炜彤	≥35	45	3	刺激方案	1	248.077	＞10天	13	＞3000	3225	HCG	3	3	1	继发不孕	0.79	＞24	25.6	女方因素	7	4.69	1082	1.68	5	17.09	5.42	41	4	6	8.5	A	IVF	1	0	0	0	0	0	0	是		无可移植胚胎
485	1	C00010132	邱文	≥35	41	2	刺激方案	1	300	≤10天	8	≤3000	2400	HCG	2	5	1	继发不孕	1.5	＞24	28.7	女方因素	6	5.84	1648	1.29	3	7.09	5.42	41	2	8	1.16	A-B	IVF	1	0	1	1	0	0	0	否	否	全胚冷冻
1238	1	C00012305	高世芹	≥35	40	3	刺激方案	1	300	≤10天	7	≤3000	2100	HCG	4	1	0	继发不孕	0.32	≤24	21	混合因素	3	6.92	942	1.03	3	10.09	5.42	41	4	6	0.53		ICSI	2	0	2	0	0	0	0	否	否	全胚冷冻
1270	1	C00017484	刘燕霞	≥35	39	2	刺激方案	1	338.158	＞10天	19	＞3000	6425	HCG	3	2	0	继发不孕	1.31	＞24	28.4	混合因素	3	16.54	869	1.4	2	9.26	5.42	28	2	9	5.2	A-B	ICSI	2	0	2	0	0	0	0	否	否	全胚冷冻
1419	1	2016090021	艾春丽	≥35	39	1	刺激方案	1	300	＞10天	11	＞3000	3300	HCG	2	3	2	继发不孕	0.89	＞24	24.4	女方因素	3	2.16	829	1.27	4	17.09	5.42	41	4	4	7.7	A-B	IVF	1	0	1	0	0	0	0	否	否	全胚冷冻
1454	0	C00016489	宋炜彤	≥35	46	6	刺激方案	1	150	≤10天	7	≤3000	1050	HCG	3	3	1	继发不孕	0.74	＞24	25.6	男方因素	3	11.27	895	1.07	3	17.09	5.42	41	4	6	6.5	C	ICSI	2	0	2	0	0	0	0	否	否	全胚冷冻
1457	0	C00015492	宋炜彤	≥35	45	5	刺激方案	1	150	≤10天	9	≤3000	1350	HCG	3	3	1	继发不孕	0.22	＞24	25.6	男方因素	3	10.07	887	0.9	4	17.09	5.42	41	4	6	6.1	C	ICSI	1	0	2	0	0	0	0	否	否	全胚冷冻
1488	1	2017100185	郑荣景	≥35	38	2	刺激方案	1	300	≤10天	10	≤3000	3000	HCG	1	3	1	继发不孕	0.940	＞24	31.3	女方因素	3	2.08	819	0.76	4	11.09	5.42	41	4	7	6.2	B	IVF	3	0	2	0	0	0	0	否	否	全胚冷冻
1497	1	C00011351	高世芹	≥35	40	2	刺激方案	1	300	≤10天	10	≤3000	3000	HCG	4	1	0	继发不孕	0.56	≤24	21	混合因素	3	9.45	961	1.23	4	10.09	5.42	41	4	6	0.5	B	ICSI	2	0	1	0	0	0	0	否	否	全胚冷冻
1599	0	C00018607	宋炜彤	≥35	46	7	刺激方案	1	225	≤10天	8	≤3000	1800	HCG	3	3	1	继发不孕	0.96	＞24	25.6	男方因素	3	5.87	912	0.52	3	17.09	5.42	41	4	6	7.1	B-C	ICSI	1	0	0	0	0	0	0	是		无可移植胚胎
1941	1	C00012035	宋炜彤	≥35	45	1	刺激方案	1	427.5	≤10天	10	＞3000	4275	HCG	3	3	1	继发不孕	1.05	＞24	25.6	女方因素	2	3.68	412	0.15	1	17.09	5.42	41	4	6	4.7	B-C	IVF	1	0	0	0	0	0	0	是		无可移植胚胎
195	0	C00016199	陈凤娟	≥35	35	2	降调节方案	3	289.583	＞10天	12	＞3000	3475	HCG	4	4	2	继发不孕	3.04	≤24	21.6	女方因素	8	2.86	2022	1.4	8	8.04	5.43	38	2	12	12.8	B	IVF	3	0	2	0	2	2	0	否	是	移植	已妊娠	临床妊娠	宫内妊娠	单胎宫内妊娠
122	0	2016120068	靳倩	＜35	28	1	降调节方案	3	170.455	＞10天	11	≤3000	1875	HCG	1	0	0	原发不孕	1.78	≤24	19.5	女方因素	9	0.85	1168	0.63	9	8.14	5.44	49.09	1	19			IVF	9	0	4	0	2	2	0	否	是	移植	未妊娠
1161	0	C00007038	毕春莲	≥35	43	2	拮抗剂方案	2	225	≤10天	7	≤3000	1575	HCG	2	2	1	继发不孕	2.66	≤24	21.5	女方因素	4	1.27	1221	0.12	6	10.59	5.44	13	2	9	6.5	B	IVF	5	0	2	1	2	2	0	否	是	移植	已妊娠	临床妊娠	宫内妊娠	单胚胎停
2169	0	C00006457	毕春莲	≥35	43	1	刺激方案	1	150	≤10天	5	≤3000	750	HCG	2	2	1	继发不孕	1.68	≤24	21.5	混合因素	1	35.37	323	0.88		10.59	5.44	13	2	9	6.6	A		0	0	0	0	0	0	0	是		未取卵
2254	0	C00016592	张福光	＜35	28	1	拮抗剂方案	2	287.5	≤10天	8	≤3000	2300	HCG	2	1	0	继发不孕	2.7	≤24	17.3	女方因素	3	2.51	1070	1.31	4	10.35	5.44	80	1	10	15.4	A-B	IVF	4	0	3	0	1	1	0	否	是	移植	未妊娠
105	1	C00010403	张翠玉	＜35	33	4	刺激方案	1	520.588	＞10天	17	＞3000	8850	双扳机	5	1	1	继发不孕	1.33	＞24	29.3	男方因素	9	2.01	1870	2.11	2	9.73	5.45	42	1	14	15.5	B	ICSI	2	0	2	0	0	0	0	否	否	全胚冷冻
206	1	C00005097	张翠玉	＜35	33	3	降调节方案	3	422.727	＞10天	11	＞3000	4650	HCG	1	0	0	原发不孕	2.9	＞24	29.3	男方因素	8	0.44	1846	0.9	7	9.73	5.45	42	1	14	19	A-B	ICSI	3	0	1	0	0	0	0	否	否	全胚冷冻
585	0	2016110128	朱小雯	≥35	35	1	降调节方案	3	280.357	＞10天	14	＞3000	3925	HCG	4	3	1	继发不孕	1.89	＞24	31.2	女方因素	6	1.51	1597	0.65	7	9.73	5.45	42	2	10	11.7	B	IVF	7	0	4	3	2	2	0	否	是	移植	已妊娠	临床妊娠	宫内妊娠	双胎宫内妊娠
901	1	2017040219	李靖	＜35	26	1	刺激方案	1	351.923	＞10天	13	＞3000	4575	HCG	3	1	0	继发不孕	1.54	≤24	22.9	女方因素	5	0.49	1035	0.88	3	6.03	5.45	15	1	7	7.2	A	IVF	2	0	2	0	0	0	0	否	否	全胚冷冻
1683	0	C00016370	刘燕霞	≥35	39	1	拮抗剂方案	2	286.364	＞10天	11	＞3000	3150	HCG	3	2	0	继发不孕	1.31	＞24	28.4	女方因素	2	2.08	788	0.63	2	9.73	5.45	42	2	9	10	A	IVF	1	0	1	0	0	0	0	否	否	全胚冷冻
416	0	2017050137	王素梅	≥35	37	1	降调节方案	3	179.545	＞10天	11	≤3000	1975	HCG	9	0	0	原发不孕	2.25	≤24	23.9	女方因素	7	1.21	1151	0.59	5	6.79	5.46	84.41	2	8	11.5	A	IVF	2	0	2	0	2	2	0	否	是	移植	已妊娠	临床妊娠	宫内妊娠	单胎宫内妊娠
764	1	C00016716	王素梅	≥35	41	2	刺激方案	1	300	≤10天	8	≤3000	2400	HCG	3	1	1	继发不孕	1.31	≤24	23.9	女方因素	5	7.85	1838	0.82	4	6.79	5.46	84.41	2	8	0.55	A	IVF	3	0	4	1	0	0	0	否	否	全胚冷冻
881	1	2018030016	谭啸	≥35	39	2	降调节方案	3	327.273	＞10天	11	＞3000	3600	HCG	7	1	1	继发不孕	1.51	≤24	23.9	不明原因	5	1.52	1148	1.33	6	4.99	5.46	51	2	9	10.9	A	IVF	3	1	3	1	2	2	0	否	是	移植	已妊娠	临床妊娠	宫内妊娠	单胚胎停
1424	0	C00012735	王秋红	≥35	41	2	拮抗剂方案	2	285	≤10天	10	≤3000	2850	HCG	1	2	0	继发不孕	0.18	≤24	21.4	女方因素	3	1.36	971	1.18	3	17.13	5.46	15	4	5	10.1	A	IVF	3	0	0	0	0	0	0	是		无可移植胚胎
1447	1	2016080236	赵佳	≥35	35	2	降调节方案	3	328.125	≤10天	8	≤3000	2625	HCG	9	2	0	继发不孕	1.55	＞24	24.3	男方因素	3	5.34	907	0.38	4	7.06	5.46	80.74	2	8	11	B	ICSI	4	0	2	1	0	0	0	否	否	全胚冷冻
1544	1	C00007191	徐婷婷	＜35	32	1	拮抗剂方案	2	358.333	≤10天	9	＞3000	3225	HCG	3	0	0	原发不孕	1.57	≤24	21.5	不明原因	3	1.04	1170	0.69	5	6.33	5.46	38	1	11	13.3	A	IVF	3	0	2	0	1	1	0	否	是	移植	未妊娠
2099	0	2016050175	王静	≥35	43	1	降调节方案	3	200	＞10天	12	≤3000	2400	HCG	4	1	0	继发不孕	0.28	＞24	24.2	女方因素	1	7.07	467	0.83	1	21.65	5.46	80.74	4	3	9.7	A	IVF	0	0	0	0	0	0	0	是		未受精
575	1	2017010011	李海霞	≥35	41	1	刺激方案	1	375	＞10天	11	＞3000	4125	HCG	3	2	2	继发不孕	1.71	＞24	33.3	女方因素	6	2.24	1698	0.75	4	11.48	5.47	36.43	2	9	12.4	A	IVF	4	0	1	0	1	1	0	否	是	移植	未妊娠
759	0	2017120278	李秀娣	≥35	43	3	拮抗剂方案	2	250	≤10天	4	≤3000	1000	HCG	2	4	1	继发不孕	0.6	＞24	24.8	混合因素	5	2.85	1343	0.54	5	16.45	5.49	89.48	4	5	11.3	A	ICSI	4	0	2	1	0	0	0	否	否	全胚冷冻
1223	0	2016030172	卢伟	≥35	45	2	降调节方案	3	285	≤10天	10	≤3000	2850	HCG	15	2	1	继发不孕	0.22	≤24	22	女方因素	3	4.84	982	1.17	3	12.89	5.49	46.98	4	4	8.1	B-C	IVF	1	0	1	0	1	1	0	否	是	移植	未妊娠
1391	1	2016060011	赵芷卉	＜35	29	1	降调节方案	3	375	＞10天	11	＞3000	4125	HCG	2	0	0	原发不孕	2.72	≤24	23.4	混合因素	3	5.5	904	0.49	7	6.1	5.49	40.6	1	14	8.1	A	ICSI	4	0	2	0	2	2	0	否	是	移植	未妊娠
1790	0	2017110228	李秀娣	≥35	42	2	刺激方案	1	245.455	＞10天	11	≤3000	2700	HCG	2	4	1	继发不孕	0.6	＞24	24.8	混合因素	2	4.73	557	2.35	0	16.45	5.49	89.48	4	5	12.5	A		0	0	0	0	0	0	0	是		未取到卵
2195	0	2016110230	赵芷卉	＜35	29	2	降调节方案	3	250.862	＞10天	29	＞3000	7275	HCG	2	0	0	原发不孕	2.04	≤24	23.4	混合因素	1	1.29	270	0.43	5	6.1	5.49	40.6	1	14	7.5	A	ICSI	4	0	2	0	0	0	0	否	否	全胚冷冻
2225	0	2017090007	李秀娣	≥35	42	1	拮抗剂方案	2	150	≤10天	7	≤3000	1050	HCG	2	4	1	继发不孕	0.6	＞24	24.8	混合因素	1	0.41	180	1.58	1	16.45	5.49	89.48	4	4	10.6	B	ICSI	1	0	1	0	1	1	0	否	是	移植	未妊娠
284	1	C00012117	杨秋香	≥35	38	1	降调节方案	3	313.636	＞10天	11	＞3000	3450	HCG	5	2	1	继发不孕	3.23	≤24	22.7	女方因素	7	2.61	2037	0.98	8	6.56	5.5	40.37	2	12	0.6	B	IVF	4	0	3	0	2	2	0	否	是	移植	已妊娠	临床妊娠	宫内妊娠	单胎宫内妊娠
1898	1	2016060152	赵恒荣	≥35	44	1	刺激方案	1	400	≤10天	6	≤3000	2400	HCG	1	1	1	继发不孕	0.41	≤24	22.4	混合因素	2	12.02	860	1.16	1	16.56	5.5	70.37	4	5	5.8	B	ICSI	0	0	0	0	0	0	0	是		未受精
2189	0	2017100100	何霞	≥35	38	2	刺激方案	1	150	≤10天	6	≤3000	900	双扳机	9	0	0	原发不孕	0.61	＞24	27	女方因素	1	5.37	285	0.33	0	12.56	5.5	40.37	4	4				0	0	0	0	0	0	0	是		未取到卵
2203	1	2016070029	梁夫芝	≥35	44	1	刺激方案	1	450	≤10天	8	＞3000	3600	HCG	3	4	1	继发不孕	0.56	＞24	26.7	女方因素	1	1.5	253	0.94	1	10.15	5.5	29.09	4	3	10	A-B	IVF	1	0	0	0	0	0	0	是		无可移植胚胎
855	0	C00018785	赵金凤	≥35	39	1	拮抗剂方案	2	225	≤10天	8	≤3000	1800	HCG	4	2	1	继发不孕	2.47	≤24	21.7	女方因素	5	2	1286.31	0.43	7	12.39	5.51	27.21	2	9	11.9	A-B	IVF	6	1	1	0	1	0	1	否	是	移植	未妊娠
1271	1	2016040141	上官厚英	≥35	44	4	刺激方案	1	300	≤10天	8	≤3000	2400	HCG	3	3	1	继发不孕	0.32	＞24	25.8	不明原因	3	2.1	869	0.68	1	12.45	5.51	69.73	4	6	12.2	A-B	IVF	1	0	0	0	0	0	0	是		无可移植胚胎
243	0	2017110001	刘晓凤	＜35	26	3	刺激方案	1	225	≤10天	9	≤3000	2025	HCG	1	1	0	继发不孕	1.82	＞24	39	混合因素	7	11.64	1973	1.75	7	6.47	5.52	17	1	10	3.9	A	ICSI	5	0	4	2	0	0	0	否	否	全胚冷冻
408	0	C00003660	郑雯泽	≥35	36	1	拮抗剂方案	2	150	≤10天	8	≤3000	1200	HCG	3	4	1	继发不孕	4.63	≤24	20	女方因素	7	2.77	1264	0.47	8	8.23	5.52	26.9	2	14	10.2	A	IVF	2	0	2	1	2	2	0	否	是	移植	已妊娠	临床妊娠	宫内妊娠	双胎宫内妊娠
685	1	2018070014	刘晓凤	＜35	27	4	刺激方案	1	330	≤10天	10	＞3000	3300	HCG	1	1	0	继发不孕	1.390	＞24	39	男方因素	5	2.1	1790	1.22	4	6.47	5.52	17	1	10	7.1	A	ICSI	2	0	2	2	0	0	0	否	否	全胚冷冻
696	1	2016060259	韩金轩	≥35	40	3	刺激方案	1	490.909	＞10天	11	＞3000	5400	HCG	4	2	0	原发不孕	1.92	≤24	20.2	男方因素	5	9.27	1733	1.46	7	12.25	5.52	45.67	2	8	8.2	B	ICSI	5	0	2	1	0	0	0	否	否	全胚冷冻
1326	1	2016040288	刘晓凤	＜35	25	2	刺激方案	1	395.455	＞10天	11	＞3000	4350	HCG	1	1	0	继发不孕	1.74	＞24	39	混合因素	3	0.92	671	2.23	4	6.47	5.52	17	1	10	8	A-B	ICSI	3	0	2	1	0	0	0	否	否	全胚冷冻
1416	1	2016050065	韩金轩	≥35	40	2	降调节方案	3	358.929	＞10天	14	＞3000	5025	HCG	4	2	0	原发不孕	1.7	≤24	20.2	男方因素	3	4.23	852	0.84	2	12.25	5.52	45.67	2	8	13.3	A	ICSI	0	0	1	0	0	0	0	否	否	全胚冷冻
232	0	2018060111	董娜娜	＜35	30	1	降调节方案	3	135	≤10天	10	≤3000	1350	HCG	2	2	0	继发不孕	1.58	＞24	26	女方因素	8	1.23	1329	0.89	7	8.61	5.53	35.42	1	15	10.3	B	IVF	5	0	4	1	2	2	0	否	是	移植	未妊娠
852	1	C00009637	吕军迎	≥35	41	2	刺激方案	1	425	≤10天	7	≤3000	2975	HCG	6	3	1	继发不孕	2.18	≤24	19.5	男方因素	5	15.53	1294	1.69	4	11.68	5.53	23.56	2	12	0.71	A	ICSI	1	0	0	0	0	0	0	是		无可移植胚胎
1102	1	C00010688	田杰	≥35	36	1	拮抗剂方案	2	293.75	＞10天	12	＞3000	3525	HCG	2	1	0	继发不孕	1.3	≤24	19.9	女方因素	4	8.95	1436	1.53	3	13.09	5.53	78	2	6	0.96	A	IVF	2	0	1	0	1	1	0	否	是	移植	未妊娠
946	0	2015110146	秦树红	≥35	47	2	刺激方案	1	180	≤10天	10	≤3000	1800	HCG	15	0	0	原发不孕	0.806	≤24	21.3	女方因素	4	5.27	735	0.65	2	10.69	5.54	13	4	3	13.5	A	IVF	2	0	1	1	0	0	0	否	否	全胚冷冻
1410	1	C00012593	周静	≥35	48	4	拮抗剂方案	2	290.625	≤10天	8	≤3000	2325	双扳机	8	3	0	继发不孕	0.83	≤24	19.5	女方因素	3	5.3	860	0.68	2	9.73	5.54	37	4	7	8.6	B	IVF	0	0	0	0	0	0	0	是		无可移植胚胎
897	0	2017040076	王慧	＜35	29	1	降调节方案	3	150	≤10天	10	≤3000	1500	HCG	5	0	0	原发不孕	2.13	≤24	21.1	女方因素	5	2.63	1051	0.58	7	8.15	5.55	43.77	1	15	10.5	A	IVF	6	0	2	0	0	0	0	否	否	全胚冷冻
1943	0	2017100063	师吉艳	≥35	42	1	刺激方案	1	150	≤10天	8	≤3000	1200	HCG	1	4	1	继发不孕	0.85	≤24	21.6	女方因素	2	7.74	393	0.68	1	12.39	5.55	28	4	3	5.3	B	IVF	1	0	1	0	0	0	0	否	否	全胚冷冻
242	1	2017110094	杨景淑	＜35	32	1	降调节方案	3	490.909	＞10天	11	＞3000	5400	HCG	5	0	0	原发不孕	2.5	＞24	29.3	不明原因	8	1.18	1184	0.58	9	7.91	5.56	20.37	1	14			IVF	4	0	4	1	2	2	0	否	是	移植	已妊娠	临床妊娠	宫内妊娠	双胎宫内妊娠
588	1	C00018899	高丽娜	≥35	39	1	拮抗剂方案	2	450	≤10天	9	＞3000	4050	HCG	13	1	0	继发不孕	2.88	≤24	21.8	女方因素	6	0.69	1593.79	1.41	4	7.08	5.56	39.3	2	10	11.8	B	IVF	3	0	2	0	0	0	0	否	否	全胚冷冻
1286	1	2016050086	李凤娟	≥35	43	3	刺激方案	1	400	≤10天	6	≤3000	2400	HCG	3	3	1	继发不孕	1.0	≤24	22.2	混合因素	3	1.19	815	2.05	2	16.15	5.56	24	4	6	6.5	A	ICSI	1	0	1	0	0	0	0	否	否	全胚冷冻
1463	1	C00017209	王静	≥35	36	1	刺激方案	1	300	≤10天	9	≤3000	2700	HCG	1	3	1	继发不孕	1.96	≤24	22.8	女方因素	3	1.66	958	0.66	4	9	5.56	57.96	2	9	5.1	A	IVF	2	0	2	2	0	0	0	否	否	全胚冷冻
1602	1	2018040223	张玉清	≥35	36	2	刺激方案	1	325	≤10天	6	≤3000	1950	HCG	3	1	1	继发不孕	1.93	≤24	20	男方因素	3	8.14	956	1.2	3	7.91	5.56	40.37	2	7			ICSI	3	0	1	1	0	0	0	否	否	全胚冷冻
1772	1	2016040233	李凤娟	≥35	43	2	降调节方案	3	425	≤10天	7	≤3000	2975	HCG	3	3	1	继发不孕	1.0	≤24	22.2	混合因素	2	11.81	595	0.71	0	16.15	5.56	24	4	6	9.7	A		0	0	0	0	0	0	0	是		未取到卵
1805	1	2016030301	李凤娟	≥35	43	1	降调节方案	3	375	≤10天	7	≤3000	2625	HCG	3	3	1	继发不孕	0.56	≤24	22.2	混合因素	2	10.91	533	1.16	0	16.15	5.56	24	4	6	8.5	A		0	0	0	0	0	0	0	是		未取到卵
1871	1	2017040088	王秋菊	≥35	37	1	刺激方案	1	382.5	≤10天	10	＞3000	3825	HCG	9	0	0	原发不孕	1.13	＞24	25.2	混合因素	2	25.84	349	1.19	1	7.91	5.56	40.37	4	6	7.7	A	ICSI	1	0	1	0	0	0	0	否	否	全胚冷冻
1918	1	2017110214	李芳	＜35	34	1	降调节方案	3	375	＞10天	13	＞3000	4875	HCG	3	1	0	继发不孕	1.07	≤24	18.3	男方因素	2	8.62	486	1.02	3	6.36	5.56	85.14	3	8	11.4	A	ICSI	3	0	2	0	2	2	0	否	是	移植	已妊娠	临床妊娠	宫内妊娠	单胚胎停
1532	0	C00003711	付美芳	≥35	40	1	降调节方案	3	160.714	≤10天	7	≤3000	1125	HCG	2	1	0	继发不孕	0.57	≤24	23.7	女方因素	3	5.57	1233	0.95	2	9.7	5.57	34.33	4	5	10.7	A-B	IVF	2	0	2	1	1	1	0	否	是	移植	未妊娠
1135	1	C00017499	魏媛媛	≥35	35	1	刺激方案	1	300	＞10天	15	＞3000	4500	HCG	1	1	0	继发不孕	2.92	≤24	22.2	女方因素	4	22.58	1330	2.04	3	9.02	5.58	58	2	7	6.3	B	IVF	1	0	0	0	0	0	0	是		无可移植胚胎
1760	1	C00019099	魏媛媛	≥35	36	2	拮抗剂方案	2	300	≤10天	8	≤3000	2400	HCG	1	1	0	继发不孕	0.890	≤24	22.2	女方因素	2	2.13	610.64	0.57	3	9.02	5.58	58	4	7	9	A	IVF	1	0	1	0	1	1	0	否	是	移植	未妊娠
333	1	2017080193	岳园园	＜35	29	2	刺激方案	1	300	＞10天	11	＞3000	3300	HCG	3	0	0	原发不孕	1.52	＞24	30	男方因素	7	2.83	2018	1.27	8	5.87	5.59	19.6	1	12	12.1	B	ICSI	7	0	4	2	2	2	0	否	是	移植	未妊娠
456	1	2016060061	孔焕丽	＜35	28	1	降调节方案	3	335	＞10天	15	＞3000	5025	HCG	2	0	0	原发不孕	2.9	＞24	25.9	女方因素	6	0.17	1724	0.69	4	8.11	5.59	58.72	1	13	11	B	IVF	1	0	2	0	2	2	0	否	是	移植	已妊娠	临床妊娠	宫内妊娠	双胎宫内妊娠
1000	0	2017060306	陈莉	≥35	41	1	拮抗剂方案	2	216.667	≤10天	9	≤3000	1950	HCG	6	3	0	继发不孕	1.64	≤24	23.4	女方因素	4	3.44	1275	0.86	3	9.26	5.59	43	2	9	9.6	A	IVF	2	0	2	1	0	0	0	否	否	全胚冷冻
1073	1	C00013061	崔玉芹	≥35	41	1	拮抗剂方案	2	291.667	≤10天	9	≤3000	2625	HCG	3	0	0	原发不孕	0.66	≤24	22.6	女方因素	4	2.67	1568	0.26	3	11.15	5.59	25	4	7	11.9	A	IVF	2	0	2	2	2	2	0	否	是	移植	已妊娠	临床妊娠	宫外妊娠	异位妊娠
1131	1	C00017260	崔玉芹	≥35	42	2	拮抗剂方案	2	300	＞10天	13	＞3000	3900	HCG	3	1	0	继发不孕	1.5	≤24	22.6	女方因素	4	3.46	1343	0.61	4	11.15	5.59	25	2	10	12.2	A	IVF	4	0	3	2	2	2	0	否	是	移植	未妊娠
82	0	2017040036	李澍	≥35	35	3	刺激方案	1	183.333	≤10天	9	≤3000	1650	HCG	2	1	1	继发不孕	2.59	≤24	19.8	女方因素	9	8.78	2232	0.59	8	7.65	5.6	53.77	2	16	6.4	A	IVF	7	0	0	0	0	0	0	是		无可移植胚胎
518	0	C00010993	李婷	≥35	42	1	降调节方案	3	225	≤10天	9	≤3000	2025	HCG	1	3	1	继发不孕	1.0	≤24	24	女方因素	6	4.65	2267	1.25	4	17.08	5.6	26	4	7	0.64	B	IVF	2	0	0	0	0	0	0	是		无可移植胚胎
788	0	2017120149	李云芳	＜35	29	1	降调节方案	3	238.636	＞10天	11	≤3000	2625	HCG	1	0	0	原发不孕	2.4	≤24	21.5	女方因素	5	0.3	1687	1.86	4	9.82	5.6	35	1	12	9.4	A	IVF	2	0	2	2	2	2	0	否	是	移植	已妊娠	临床妊娠	宫内妊娠	双胎宫内妊娠
1139	1	C00012619	李婷	≥35	42	3	刺激方案	1	300	≤10天	9	≤3000	2700	HCG	1	3	1	继发不孕	0.18	≤24	24	女方因素	4	3.43	1313	0.89	2	17.08	5.6	26	4	5	0.88	A-B	IVF	1	0	1	0	1	1	0	否	是	移植	未妊娠
1542	0	2017110165	辛欣	＜35	26	1	刺激方案	1	225	＞10天	11	≤3000	2475	HCG	2	0	0	原发不孕	1.26	≤24	19.5	女方因素	3	20.14	1171	1.49	2	8.58	5.6	80.6	1	8	6.3	A	IVF	2	0	1	0	0	0	0	否	否	全胚冷冻
1727	0	C00011675	李婷	≥35	42	2	刺激方案	1	256.25	＞10天	12	＞3000	3075	HCG	1	3	1	继发不孕	1.17	≤24	24	女方因素	2	12.38	688	1.59	2	17.08	5.6	26	4	5	0.86	B	IVF	0	0	0	0	0	0	0	是		无可移植胚胎
2	0	2017060026	丛婷婷	＜35	29	1	降调节方案	3	225	≤10天	9	≤3000	2025	HCG	6	0	0	继发不孕	2.89	＞24	26.6	女方因素	10	0.83	2737	0.48	5	9.95	5.61	39	1	12	10.3		IVF	4	0	4	0	2	2	0	否	是	移植	已妊娠	临床妊娠	宫内妊娠	单胚胎停
266	1	2018020081	牛光会	＜35	34	1	降调节方案	3	309.091	＞10天	11	＞3000	3400	HCG	1	3	0	继发不孕	2.53	＞24	26.4	女方因素	7	4.63	2411	1.69	8	6.53	5.61	69.73	1	10	9.6	A	IVF	5	0	4	1	2	2	0	否	是	移植	未妊娠
768	1	C00010356	高琳琳	≥35	36	4	刺激方案	1	330	≤10天	10	＞3000	3300	HCG	4	0	0	原发不孕	1.94	≤24	23.2	女方因素	5	15.33	1813	1.78	3	16.59	5.61	20	2	7	0.75	A-B	IVF	0	0	1	0	0	0	0	否	否	全胚冷冻
1393	1	C00012356	高琳琳	≥35	37	5	刺激方案	1	300	＞10天	11	＞3000	3300	HCG	5	0	0	原发不孕	0.21	≤24	23.2	女方因素	3	13.52	903	1.19	2	16.59	5.61	20	4	4	0.47	B	IVF	1	0	0	0	0	0	0	是		无可移植胚胎
1500	1	C00017297	王斐	＜35	34	1	降调节方案	3	337.5	＞10天	14	＞3000	4725	HCG	1	1	0	继发不孕	3.21	＞24	25.1	女方因素	3	1.25	957	2.07	4	10.11	5.61	48	1	10	16	B-C	IVF	1	1	2	0	0	0	0	否	否	全胚冷冻
1612	1	C00014735	高琳琳	≥35	37	6	刺激方案	1	450	＞10天	12	＞3000	5400	HCG	5	0	0	原发不孕	0.41	≤24	23.2	女方因素	2	27.4	979	1.77	1	16.59	5.61	20	4	5	0.49	B	IVF	1	0	1	1	0	0	0	否	否	全胚冷冻
2072	1	C00015833	高琳琳	≥35	38	7	刺激方案	1	450	≤10天	8	＞3000	3600	HCG	5	0	0	原发不孕	0.64	≤24	23.2	女方因素	1	24.45	559	0.97	1	16.59	5.61	20	4	2	0.52	A-B	IVF	0	0	0	0	0	0	0	是		未受精
177	0	2017090237	高盼盼	＜35	28	3	降调节方案	3	204.545	＞10天	11	≤3000	2250	HCG	3	0	0	原发不孕	4.10	≤24	20.3	混合因素	8	1.24	2365	0.86	9	7.28	5.62	30.6	1	14	12.8	A	ICSI	3	0	2	1	2	2	0	否	是	移植	未妊娠
534	0	2018030197	吴盈盈	＜35	34	1	降调节方案	3	216.667	＞10天	12	≤3000	2600	HCG	1	3	1	继发不孕	2.31	＞24	27.8	女方因素	6	3.15	2064	2.81	7	5.23	5.62	38	1	10	8	A-B	IVF	5	0	2	0	0	0	0	否	否	全胚冷冻
163	1	2017050036	刘梅	＜35	31	1	刺激方案	1	300	≤10天	10	≤3000	3000	HCG	2	1	1	继发不孕	1.96	＞24	27.3	女方因素	8	7.11	2706	0.77	5	8.34	5.63	66.43	1	9	9.4	B	IVF	3	0	2	0	0	0	0	否	否	全胚冷冻
662	1	2018030294	朱庆花	≥35	36	2	刺激方案	1	291.667	≤10天	9	≤3000	2625	HCG	6	1	1	继发不孕	3.97	＞24	26.8	不明原因	5	0.74	1426	0.73	6	8.69	5.63	53.77	2	11	8.5	B-C	IVF	5	0	2	0	0	0	0	否	否	全胚冷冻
1745	0	2016080205	高红	≥35	42	1	刺激方案	1	225	≤10天	9	≤3000	2025	HCG	10	1	1	继发不孕	0.320	＞24	28.2	女方因素	2	15.5	636	0.28	1	8.94	5.63	56.43	4	5	4.5	B	IVF	0	0	0	0	0	0	0	是		无可移植胚胎
1819	1	2018030188	高红	≥35	43	5	刺激方案	1	431.25	≤10天	8	＞3000	3450	HCG	10	1	1	继发不孕	0.45	＞24	28.2	男方因素	2	1.64	511	0.63	3	8.94	5.63	86.43	4	5	8.4	B	ICSI	2	0	0	0	0	0	0	是		无可移植胚胎
1882	0	2016040162	贾玉芬	≥35	37	1	降调节方案	3	178.846	＞10天	13	≤3000	2325	HCG	1	4	1	继发不孕	2.427	＞24	26.2	女方因素	2	0.77	253	0.33	0	5.77	5.63	86.43	2	16	10.8	A-B		0	0	0	0	0	0	0	是		未取到卵
2261	0	2017090244	高红	≥35	43	1	刺激方案	1	225	≤10天	7	≤3000	1575	HCG	10	1	1	继发不孕	0.22	＞24	28.2	女方因素	1	7.94	329	0.05	0	8.94	5.63	56.43	4	4				0	0	0	0	0	0	0	是		未取到卵
1448	0	2016120077	杨翠	≥35	39	1	刺激方案	1	150	≤10天	7	≤3000	1050	HCG	2	3	1	继发不孕	1.39	≤24	22.8	女方因素	3	9.48	905	0.62	3	8.6	5.64	59.09	2	8	6.3	B-C	IVF	2	0	2	1	0	0	0	否	否	全胚冷冻
555	0	2016120139	甄兰兰	＜35	32	1	降调节方案	3	156.818	＞10天	11	≤3000	1725	HCG	4	0	0	原发不孕	1.20	≤24	19.4	女方因素	6	1.48	1865	0.81	3	6.89	5.65	86.43	1	12	10.2	A	IVF	3	0	3	0	2	2	0	否	是	移植	已妊娠	临床妊娠	宫内妊娠	单胎宫内妊娠
1152	1	2017030077	郑荣景	≥35	37	1	刺激方案	1	341.667	≤10天	9	＞3000	3075	HCG	1	3	1	继发不孕	1.603	＞24	31.3	女方因素	4	5.77	1247	0.56	4	9.02	5.65	40	2	7	11.6	A	IVF	3	0	2	1	2	2	0	否	是	移植	未妊娠
1224	1	C00004984	狄冉	≥35	42	4	拮抗剂方案	2	431.25	≤10天	8	＞3000	3450	双扳机	2	3	1	继发不孕	1.91	＞24	26	男方因素	3	2.36	981	0.96	5	13.02	5.65	40	2	11			ICSI	3	0	1	0	0	0	0	否	否	全胚冷冻
1308	0	2018070131	狄冉	≥35	42	3	拮抗剂方案	2	185.294	＞10天	17	＞3000	3150	HCG	2	3	1	继发不孕	1.48	＞24	26	男方因素	3	4.41	741	0.15	3	13.02	5.65	40	2	11	9.9	B	ICSI	2	0	0	0	0	0	0	是		无可移植胚胎
1371	1	2018050027	狄冉	≥35	41	2	降调节方案	3	432.143	＞10天	14	＞3000	6050	HCG	1	3	1	继发不孕	1.9	＞24	26	女方因素	3	0.59	486	0.42	2	13.02	5.65	40	2	11	9.7	B-C	IVF	1	0	0	0	0	0	0	是		无可移植胚胎
199	0	C00012973	谭菁菁	≥35	37	1	降调节方案	3	283.333	＞10天	12	＞3000	3400	HCG	4	0	0	原发不孕	1.83	≤24	23.6	女方因素	8	1.18	1959	0.75	9	8.69	5.66	52.4	2	13	12.6	A-B	IVF	7	0	2	0	0	0	0	否	否	全胚冷冻
553	1	C00012537	杨淑萍	≥35	41	1	刺激方案	1	300	≤10天	8	≤3000	2400	HCG	3	1	1	继发不孕	1.66	＞24	26.2	女方因素	6	4.4	1879	0.84	5	8.55	5.66	87.4	2	11	1.06	B	IVF	1	0	2	0	2	2	0	否	是	移植	未妊娠
678	0	2017100057	刘晓芳	≥35	35	1	刺激方案	1	150	≤10天	9	≤3000	1350	HCG	7	0	0	原发不孕	2.48	≤24	21.6	男方因素	5	13.31	1821	1.27	5	8.99	5.67	32.15	2	9	7.1	B	ICSI	3	0	2	1	0	0	0	否	否	全胚冷冻
723	0	2016020132	陶园	＜35	33	1	降调节方案	3	275	＞10天	11	＞3000	3025	HCG	2	1	0	继发不孕	1.12	≤24	19.2	女方因素	5	4.26	1557	2.01	4	7.85	5.67	55.42	3	7	10.7	B	IVF	3	0	2	1	0	0	0	否	否	全胚冷冻
1210	0	2016100095	陶园	＜35	33	2	降调节方案	3	267.857	≤10天	7	≤3000	1875	HCG	2	1	0	继发不孕	2.32	≤24	19.2	女方因素	4	21.49	1060	2.36	7	7.85	5.67	65.42	1	7	10.4	A	IVF	0	0	0	0	2	2	0	否	是	移植	未妊娠
1466	1	2016030119	张延华	≥35	47	3	刺激方案	1	350	≤10天	7	≤3000	2450	HCG	2	3	0	继发不孕	0.34	≤24	22.8	混合因素	3	9.3	955	0.99	5	16.34	5.67	40.88	4	5	6.8	A	ICSI	3	0	3	2	0	0	0	否	否	全胚冷冻
1601	1	2017070026	杨晓梅	≥35	35	1	降调节方案	3	309.615	＞10天	13	＞3000	4025	HCG	4	0	0	原发不孕	0.96	≤24	19.1	男方因素	3	1.3	910	0.44	1	10.34	5.67	40.88	4	6	9	A	ICSI	0	0	0	0	0	0	0	是		无可移植胚胎
1993	1	2017010109	陶园	＜35	33	3	降调节方案	3	372.5	≤10天	10	＞3000	3725	HCG	2	1	0	继发不孕	2.01	≤24	19.2	女方因素	2	10.83	502	0.85	2	7.85	5.67	23	1	7	9.4	A	IVF	2	0	2	0	2	2	0	否	是	移植	已妊娠	临床妊娠	宫内妊娠	单胎宫内妊娠
223	1	2018030204	郭欣	≥35	37	1	降调节方案	3	305.769	＞10天	13	＞3000	3975	HCG	1	3	0	继发不孕	3.070	≤24	16.5	不明原因	8	0.82	1572	0.81	4	16.55	5.68	53	2	8	14.6	A	IVF	4	0	4	1	0	0	0	否	否	全胚冷冻
1860	0	2016080098	燕国英	≥35	44	1	刺激方案	1	225	≤10天	8	≤3000	1800	HCG	1	4	1	继发不孕	0.19	≤24	22.5	女方因素	2	3.16	378	2.04	1	16.67	5.68	43	4	4	7.2	A	IVF	1	0	1	1	0	0	0	否	否	全胚冷冻
286	0	2017070262	肖芳	≥35	44	1	降调节方案	3	262.5	≤10天	8	≤3000	2100	HCG	2	4	1	继发不孕	3.53	≤24	21.5	混合因素	7	8.17	2025	1.32	7	7.9	5.69	46.43	2	14	8.5	A	ICSI	6	0	4	3	2	2	0	否	是	移植	未妊娠
680	1	2017090233	刘晓杰	＜35	27	1	降调节方案	3	403.846	＞10天	13	＞3000	5250	HCG	3	2	0	继发不孕	3.15	＞24	27.3	女方因素	5	1	1600	0.53	7	7.4	5.69	28	1	11	9.3	A	IVF	6	0	6	0	2	2	0	否	是	移植	已妊娠	临床妊娠	宫内妊娠	双胎宫内妊娠
951	1	C00018016	郝亚飞	≥35	38	2	刺激方案	1	300	＞10天	12	＞3000	3600	HCG	3	2	2	继发不孕	1.7	≤24	19.5	混合因素	4	18.94	687.06	0.58	0	15.02	5.69	33	2	7	5.5	B-C		0	0	0	0	0	0	0	是		未取到卵
1124	0	2016030225	柳风连	＜35	29	1	降调节方案	3	267.857	＞10天	14	＞3000	3750	HCG	3	3	0	继发不孕	1.86	≤24	22	女方因素	4	1.68	1362	1.15	5	7.43	5.69	11	1	8	13.5	B	IVF	3	0	2	0	2	2	0	否	是	移植	已妊娠	临床妊娠	宫内妊娠	单胎宫内妊娠
323	1	C00016340	宋小雪	≥35	38	1	降调节方案	3	300	＞10天	11	＞3000	3300	HCG	2	1	0	继发不孕	4.55	≤24	23.4	女方因素	7	1.81	2137	0.88	8	8.79	5.7	31	2	12	13.7	A	IVF	6	0	3	0	2	2	0	否	是	移植	已妊娠	临床妊娠	宫内妊娠	单胎宫内妊娠
389	1	2016100019	贾琳瑶	＜35	29	1	降调节方案	3	310	＞10天	15	＞3000	4650	HCG	1	0	0	原发不孕	2.52	≤24	22.5	女方因素	7	1.14	1492	1.44	9	8.18	5.7	82.55	1	12	14.7	A	IVF	7	0	4	0	2	2	0	否	是	移植	已妊娠	临床妊娠	宫内妊娠	单胎宫内妊娠
880	0	2017020177	郑金凤	≥35	38	1	降调节方案	3	158.333	≤10天	9	≤3000	1425	HCG	1	3	1	继发不孕	4.12	＞24	25.7	女方因素	9	1.91	1914	0.76	9	6.09	5.7	35	2	14	13.9	A	IVF	7	0	7	5	2	2	0	否	是	移植	已妊娠	临床妊娠	宫内妊娠	双胎宫内妊娠
1854	1	2018060232	陆田田	≥35	36	4	降调节方案	3	375	≤10天	5	≤3000	1875	HCG	2	1	0	继发不孕	1.05	＞24	28.6	混合因素	2	4.92	414	0.63	0	8.76	5.7	86.43	4	6	10.2	A		0	0	0	0	0	0	0	是		未取到卵
577	1	2016060031	刘红	≥35	46	3	刺激方案	1	328.125	≤10天	8	≤3000	2625	HCG	2	4	1	继发不孕	0.12	＞24	26	女方因素	6	0.72	1650	0.95	7	12.45	5.71	36.43	4	7	8.5	B	IVF	5	0	2	0	0	0	0	否	否	全胚冷冻
675	0	2016020019	王春莲	≥35	45	1	降调节方案	3	232.5	≤10天	10	≤3000	2325	HCG	1	4	1	继发不孕	0.62	＞24	24.9	女方因素	5	8.32	1863	0.81	5	11.54	5.71	53.77	4	7	11	A	IVF	2	0	2	2	2	2	0	否	是	移植	未妊娠
887	0	C00003645	魏倩倩	＜35	32	2	降调节方案	3	275	＞10天	12	＞3000	3300	HCG	3	1	1	继发不孕	2.17	≤24	19.1	男方因素	5	2.08	1097	1.22	4	8.84	5.71	30.1	1	12	14	A	ICSI	0	0	0	0	0	0	0	是		无可移植胚胎
1024	1	2016020156	刘红	≥35	46	1	刺激方案	1	300	≤10天	9	≤3000	2700	HCG	2	4	1	继发不孕	0.33	＞24	26	女方因素	4	3.24	1178	1.65	2	14.56	5.71	78.43	4	4	8.9	B	IVF	1	0	1	1	0	0	0	否	否	全胚冷冻
1067	1	2016090243	刘红	≥35	47	4	刺激方案	1	300	≤10天	8	≤3000	2400	HCG	2	4	1	继发不孕	0.75	＞24	26	混合因素	4	8.99	1593	1.39	4	14.34	5.71	78.43	4	5	6	B	ICSI	4	0	2	1	0	0	0	否	否	全胚冷冻
1512	1	2016050078	刘红	≥35	46	2	刺激方案	1	333.333	≤10天	9	≤3000	3000	HCG	2	4	1	继发不孕	1.01	＞24	26	女方因素	3	0.88	883.58	0.77	3	12.45	5.71	36.43	4	6	8	B-C	IVF	2	0	0	0	0	0	0	是		无可移植胚胎
1700	0	2016010148	颜世英	≥35	45	4	刺激方案	1	225	≤10天	7	≤3000	1575	HCG	2	1	1	继发不孕	0.87	≤24	22.5	女方因素	2	15.87	753	0.55	2	14.56	5.71	54	4	3	7.9	A-B	IVF	1	0	1	0	0	0	0	否	否	全胚冷冻
359	1	C00008942	于雪萍	≥35	38	2	降调节方案	3	407.143	＞10天	14	＞3000	5700	HCG	2	0	0	原发不孕	2.26	≤24	17.6	女方因素	9	1.72	1858	1.06	8	8.99	5.72	38.58	2	14	1.34	A	IVF	6	0	6	1	2	2	0	否	是	移植	已妊娠	临床妊娠	宫内妊娠	单胎宫内妊娠
984	1	C00010475	程莉	≥35	36	1	拮抗剂方案	2	325	＞10天	12	＞3000	3900	HCG	4	1	1	继发不孕	2.05	≤24	19.6	女方因素	4	5.46	1339	1.38	3	6.7	5.72	37	2	8	1.37	A	IVF	2	0	0	0	0	0	0	是		无可移植胚胎
1191	1	C00010565	任淑青	≥35	46	1	拮抗剂方案	2	309.375	≤10天	8	≤3000	2475	双扳机	1	5	1	继发不孕	0.81	≤24	22.6	女方因素	4	1.12	1093	1.64	3	13.18	5.72	86	4	6	6.2		IVF	2	0	1	0	1	1	0	否	是	移植	未妊娠
1471	1	C00011987	任淑青	≥35	47	2	拮抗剂方案	2	450	＞10天	13	＞3000	5850	HCG	1	5	1	继发不孕	0.57	≤24	22.6	女方因素	3	20.38	928	0.68	1	13.18	5.72	86	4	6	7.2	A	IVF	1	0	1	0	1	1	0	否	是	移植	未妊娠
1913	1	C00014154	任淑青	≥35	47	6	刺激方案	1	300	≤10天	6	≤3000	1800	HCG	1	5	1	继发不孕	0.45	≤24	22.6	女方因素	2	1.65	497	0.09	2	13.18	5.72	86	4	6	0.8	A	IVF	1	0	0	0	0	0	0	是		无可移植胚胎
1954	1	C00015378	任淑青	≥35	47	7	刺激方案	1	428.571	≤10天	7	≤3000	3000	HCG	1	5	1	继发不孕	0.12	≤24	22.6	女方因素	2	1.91	499.54	0.4	3	13.18	5.72	86	4	6	0.79	A-B	IVF	3	0	3	0	0	0	0	否	否	全胚冷冻
760	1	C00003310	赵兰英	≥35	49	1	刺激方案	1	300	≤10天	4	≤3000	1200	HCG	5	5	1	继发不孕	0.23	≤24	24	女方因素	5	10.84	1332	1.33	2	12.42	5.73	56.43	4	3	8.2	A-B	IVF	2	0	2	1	0	0	0	否	否	全胚冷冻
1994	1	C00004519	赵兰英	≥35	49	2	刺激方案	1	375	≤10天	8	≤3000	3000	HCG	5	5	1	继发不孕	0.75	≤24	24	女方因素	2	1.91	499.54	0.4	1	12.42	5.73	56.43	4	3	4	B	IVF	0	0	0	0	0	0	0	是		无可移植胚胎
2223	0	C00017768	吴海丽	≥35	35	1	降调节方案	3	275	≤10天	9	≤3000	2475	HCG	1	2	2	继发不孕	1.4	＞24	28.3	混合因素	1	0.28	192.91	0.31	1	10.33	5.73	46.35	2	7	9.4	C	ICSI	1	0	1	0	1	1	0	否	是	移植	未妊娠
107	0	2016020049	吴雪	＜35	34	1	降调节方案	3	281.25	＞10天	12	＞3000	3375	HCG	3	0	0	原发不孕	3.92	≤24	19.4	女方因素	9	0.35	1868	0.47	7	9.58	5.74	46.43	1	12	16.2	A	IVF	4	0	1	0	0	0	0	否	否	全胚冷冻
711	1	C00016523	陈景花	≥35	39	1	拮抗剂方案	2	309.375	≤10天	8	≤3000	2475	HCG	2	2	1	继发不孕	0.48	≤24	20.6	女方因素	5	8.63	1631.13	0.28	4	5.76	5.74	83.57	4	6	13	A	IVF	2	0	2	1	2	2	0	否	是	移植	已妊娠	临床妊娠	宫内妊娠	单胎宫内妊娠
781	0	C00004992	李敬菊	≥35	42	4	刺激方案	1	251.786	＞10天	14	＞3000	3525	HCG	1	2	1	继发不孕	0.59	＞24	25.6	女方因素	5	10.18	1752	1.24	4	14.53	5.74	74.34	4	6	5.9	B	IVF	2	0	2	0	0	0	0	否	否	全胚冷冻
1194	0	C00012431	张蒙蒙	＜35	34	3	刺激方案	1	158.333	≤10天	9	≤3000	1425	双扳机	1	0	0	原发不孕	1.1	≤24	22.2	女方因素	4	9.21	1076	0.5	4	11.75	5.74	83	3	5			IVF	4	0	4	2	0	0	0	否	否	全胚冷冻
1430	0	2017040217	王凤娟	＜35	33	1	刺激方案	1	225	＞10天	11	≤3000	2475	HCG	4	0	0	继发不孕	1.22	＞24	25.2	女方因素	3	3	959	0.95	2	7.13	5.74	93	1	8	12	A	IVF	1	0	1	0	1	1	0	否	是	移植	未妊娠
1859	0	2018010228	王凤娟	＜35	33	3	刺激方案	1	230.357	＞10天	14	＞3000	3225	HCG	4	1	0	继发不孕	1.18	＞24	25.2	女方因素	2	11.34	382	2.02	0	7.13	5.74	51.75	3	8	12.5	A		0	0	0	0	0	0	0	是		未取到卵
1905	1	C00003948	杨咏梅	≥35	43	3	刺激方案	1	327.273	＞10天	11	＞3000	3600	HCG	1	4	1	继发不孕	0.53	≤24	19.8	混合因素	2	15.34	511	2.08	2	18.97	5.74	84	4	3	4.9	B	ICSI	0	0	0	0	0	0	0	是		无可移植胚胎
1950	0	C00004955	张欣彦	≥35	36	1	降调节方案	3	225.735	＞10天	17	＞3000	3837.5	HCG	2	2	1	继发不孕	1.2	≤24	22.1	女方因素	2	0.3	506	0.8	3	11.82	5.74	82	2	8	11.9	B	IVF	3	1	2	0	0	0	0	否	否	全胚冷冻
2066	1	2018060077	李敬菊	≥35	41	1	刺激方案	1	300	≤10天	5	≤3000	1500	HCG	1	2	1	继发不孕	1.26	＞24	25.6	女方因素	1	11.57	573	0.54	2	14.53	5.74	74.34	2	6	8.8	B	IVF	1	0	1	0	0	0	0	否	否	全胚冷冻
2078	0	2017110291	王凤娟	＜35	33	2	刺激方案	1	181.25	＞10天	12	≤3000	2175	HCG	4	1	0	继发不孕	1.4	＞24	25.2	女方因素	1	3.59	525	0.72	1	7.13	5.74	93	1	8	11.7	A	IVF	1	0	1	0	0	0	0	否	否	全胚冷冻
513	0	C00010217	李永文	＜35	32	1	拮抗剂方案	2	216.667	≤10天	9	≤3000	1950	HCG	2	1	0	继发不孕	3.85	≤24	19.6	女方因素	6	4.33	2316	0.79	7	8.4	5.75	49	1	12	11.3	A-B	IVF	3	1	3	0	2	2	0	否	是	移植	未妊娠
584	0	2017040013	李霄丽	＜35	26	1	降调节方案	3	253.125	≤10天	8	≤3000	2025	HCG	2	0	0	原发不孕	1.84	≤24	24	不明原因	6	9.42	1610	0.98	4	6.1	5.76	33.03	1	9	15.7	A	IVF	1	0	0	0	0	0	0	是		无可移植胚胎
659	1	C00011460	王凤霞	≥35	35	2	刺激方案	1	300	≤10天	10	≤3000	3000	HCG	6	0	0	原发不孕	1.36	≤24	21	女方因素	5	16.91	1001	3.4	1	13.21	5.76	29	2	6	0.6	A-B	IVF	1	0	1	1	0	0	0	否	否	全胚冷冻
709	1	C00015900	王凤霞	≥35	36	4	刺激方案	1	300	≤10天	8	≤3000	2400	HCG	7	0	0	原发不孕	1.26	≤24	21	女方因素	5	23.59	1645	0.93	4	13.21	5.76	29	2	6	0.48	A-B	IVF	2	0	2	0	0	0	0	否	否	全胚冷冻
858	1	C00014364	于淑华	≥35	42	1	刺激方案	1	316.667	≤10天	9	≤3000	2850	HCG	1	1	1	继发不孕	0.334	＞24	28	女方因素	5	3.2	1275	0.95	2	9.35	5.76	35.84	4	5	1.05	A-B	IVF	1	0	1	0	1	1	0	否	是	移植	未妊娠
1019	1	C00007082	王凤霞	＜35	34	1	刺激方案	1	346.875	≤10天	8	≤3000	2775	HCG	6	0	0	原发不孕	1.17	≤24	21	女方因素	4	18.25	1195	0.88	2	13.21	5.76	29	3	6	0.45	A-B	IVF	1	0	1	0	0	0	0	否	否	全胚冷冻
1842	1	C00019053	于淑华	≥35	43	2	刺激方案	1	450	＞10天	11	＞3000	4950	HCG	1	1	1	继发不孕	0.23	＞24	28	女方因素	2	8.39	456.45	0.76	1	9.35	5.76	35.84	4	5	7.2	A	IVF	0	0	0	0	0	0	0	是		无可移植胚胎
258	0	2018060146	解洪杰	＜35	31	1	刺激方案	1	115	≤10天	10	≤3000	1150	HCG	4	0	0	原发不孕	3.65	≤24	21.5	女方因素	7	3.78	2628	1.25	8	5.33	5.77	36.8	1	16	11.7	A	IVF	6	0	4	0	2	2	0	否	是	移植	已妊娠	临床妊娠	宫内妊娠	单胎宫内妊娠
461	1	2018030223	翟新菊	≥35	38	2	降调节方案	3	465	＞10天	15	＞3000	6975	HCG	2	3	1	继发不孕	1.77	≤24	22.3	男方因素	6	1.09	1650	0.49	6	7.36	5.77	46.43	2	12	13.8	A	ICSI	5	0	1	0	1	1	0	否	是	移植	未妊娠
784	0	2016110015	邢宏雷	＜35	28	1	降调节方案	3	215	≤10天	10	≤3000	2150	HCG	2	2	0	继发不孕	2.58	≤24	22	混合因素	5	0.6	1733	1.47	6	7.91	5.77	34.76	1	10	9.6	B	ICSI	5	0	4	0	0	0	0	否	否	全胚冷冻
205	1	C00003591	孙晓玲	≥35	40	1	降调节方案	3	293.182	＞10天	11	＞3000	3225	HCG	1	2	1	继发不孕	1.59	≤24	21.6	女方因素	8	0.97	1863	1.17	9	6.68	5.78	16	2	13	10.8	A-B	IVF	5	0	2	0	2	2	0	否	是	移植	已妊娠	临床妊娠	宫内妊娠	单胚胎停
287	0	2017070258	刘芳	＜35	30	1	降调节方案	3	290	＞10天	15	＞3000	4350	HCG	2	0	0	原发不孕	3.66	≤24	22.7	女方因素	7	4.05	2020	1.49	5	13.61	5.78	86.43	1	17	18.5	A-B	IVF	2	0	0	0	0	0	0	是		无可移植胚胎
455	0	C00008994	宗红	＜35	34	1	刺激方案	1	225	≤10天	7	≤3000	1575	HCG	5	1	1	继发不孕	2.68	≤24	23.1	女方因素	6	9.13	1746	1.27	6	8.04	5.78	34.78	1	9	0.57	B	IVF	3	0	2	0	0	0	0	否	否	全胚冷冻
744	0	2017070248	赵万方	≥35	37	1	降调节方案	3	234.375	≤10天	8	≤3000	1875	HCG	1	8	1	继发不孕	2.42	≤24	22.2	女方因素	5	5.61	1426.56	0.7	4	7.21	5.78	25.42	2	9	9	A	IVF	3	0	2	0	0	0	0	否	否	全胚冷冻
861	0	C00016079	郝娟	＜35	33	1	拮抗剂方案	2	266.667	≤10天	9	≤3000	2400	HCG	4	1	1	继发不孕	3.06	≤24	21.5	男方因素	5	5.28	1254	0.54	5	13.62	5.78	36	1	12	10.6	A-B	IVF	5	0	4	2	1	1	0	否	是	移植	未妊娠
1094	1	C00005251	张茹	＜35	31	1	拮抗剂方案	2	387.5	≤10天	6	≤3000	2325	HCG	1	0	0	原发不孕	1.64	≤24	20.7	女方因素	4	8.37	1463	1.38	4	14.8	5.78	82	1	9	11.6	A	IVF	2	1	3	1	2	2	0	否	是	移植	已妊娠	临床妊娠	宫内妊娠	单胎宫内妊娠
1229	1	C00013040	董雪	≥35	42	2	刺激方案	1	525	≤10天	4	≤3000	2100	双扳机	7	3	1	继发不孕	0.83	≤24	23.4	女方因素	3	28.34	970	0.83	1	14.47	5.78	65.37	4	6	0.6	B	IVF	0	0	0	0	0	0	0	是		无可移植胚胎
1551	0	2017060209	韩立香	≥35	45	1	刺激方案	1	177.083	＞10天	12	≤3000	2125	HCG	2	2	1	继发不孕	0.7	≤24	22	女方因素	3	7	1151	1.66	2	12.08	5.78	32	4	5	5.2	B	IVF	2	0	2	0	0	0	0	否	否	全胚冷冻
1730	1	2016080129	窦有霜	≥35	48	1	刺激方案	1	350	＞10天	15	＞3000	5250	HCG		0	0	原发不孕	0.76	＞24	24.4	混合因素	2	4.64	679	0.91	0	4.43	5.78	82	4	2	6	B		0	0	0	0	0	0	0	是		未取到卵
1766	1	2018010134	赵万方	≥35	38	2	拮抗剂方案	2	300	≤10天	6	≤3000	1800	HCG	2	8	1	继发不孕	1.3	≤24	22.2	男方因素	2	2.26	606	0.39	2	7.21	5.78	55.42	2	9			ICSI	2	0	1	0	0	0	0	否	否	全胚冷冻
190	1	C00017361	曹秀杰	≥35	36	2	拮抗剂方案	2	316.071	＞10天	14	＞3000	4425	双扳机	2	4	2	原发不孕	0.87	≤24	16	女方因素	8	0.74	2123	1.06	0	6.11	5.79	34	4	6				0	0	0	0	0	0	0	是		未取到卵
391	0	2017070079	鲁云霞	＜35	34	1	降调节方案	3	218.75	＞10天	12	≤3000	2625	HCG	6	0	0	原发不孕	1.33	＞24	26	混合因素	7	0.48	1419	0.42	7	9.36	5.79	59.09	1	15	17.7	A	ICSI	7	0	2	0	0	0	0	否	否	全胚冷冻
629	1	2018030116	鲁云霞	≥35	35	2	刺激方案	1	300	≤10天	10	≤3000	3000	HCG	6	0	0	原发不孕	1.89	＞24	26	男方因素	6	10.44	1105	1.6	7	9.36	5.79	49.09	2	15	7.2	B	ICSI	1	0	0	0	0	0	0	是		无可移植胚胎
1341	1	2018010072	张馨月	≥35	37	1	降调节方案	3	375	＞10天	12	＞3000	4500	HCG	3	1	0	继发不孕	0.54	＞24	25.3	女方因素	3	1.53	616	0.18	1	12.95	5.79	34.97	4	5	10.7	B	IVF	0	0	1	0	0	0	0	否	否	全胚冷冻
906	1	2018070097	丁杨杨	＜35	33	2	降调节方案	3	346.154	＞10天	13	＞3000	4500	HCG	5	2	1	继发不孕	1.75	≤24	22	女方因素	4	3.26	976	0.52	6	7.77	5.8	57	1	10	12.4	A-B	IVF	4	0	2	0	0	0	0	否	否	全胚冷冻
1301	1	2017030065	张小明	≥35	40	1	降调节方案	3	393.75	＞10天	16	＞3000	6300	HCG	3	1	1	继发不孕	1.32	＞24	26	女方因素	3	1.02	773	0.74	6	6.19	5.8	52	2	8	12.4	A	IVF	3	0	0	0	0	0	0	是		无可移植胚胎
1128	0	C00010800	孔娟	≥35	38	3	拮抗剂方案	2	150	≤10天	10	≤3000	1500	HCG	1	2	0	继发不孕	1.73	≤24	22	女方因素	4	4.43	1350	0.62	4	8.49	5.81	36.43	2	8	10.4	A	IVF	3	0	2	2	0	0	0	否	否	全胚冷冻
1464	0	C00009634	孔娟	≥35	38	2	拮抗剂方案	2	150	≤10天	9	≤3000	1350	HCG	1	2	0	继发不孕	1.73	≤24	22	女方因素	3	3.37	958	1.47	3	8.49	5.81	36.43	2	8	9.8	A	IVF	0	1	1	0	0	0	0	否	否	全胚冷冻
2031	1	2017020076	丁立梅	≥35	43	2	降调节方案	3	462.5	＞10天	14	＞3000	6475	HCG	1	4	1	继发不孕	0.06	≤24	20.9	女方因素	1	5.26	709	0.76	0	17.03	5.81	95.08	4	2	10.8	A		0	0	0	0	0	0	0	是		未取到卵
2096	1	2017030083	徐燕妮	≥35	42	1	降调节方案	3	380	＞10天	15	＞3000	5700	HCG	1	2	1	继发不孕	0.96	≤24	23.7	混合因素	1	3.13	482	0.25	1	12.82	5.81	73.4	4	3	7.5	A	ICSI	0	0	0	0	0	0	0	是		未受精
2246	1	2017040193	丁立梅	≥35	43	3	刺激方案	1	305.357	＞10天	14	＞3000	4275	HCG	1	4	1	继发不孕	0.48	≤24	20.9	男方因素	1	7.07	467	0.83	1	17.03	5.81	95.08	4	2	10.5	A-B	ICSI	0	0	0	0	0	0	0	是		无可移植胚胎
9	0	C00012101	郭艳皊	＜35	24	1	刺激方案	1	105	＞10天	15	≤3000	1575	HCG	2	0	0	原发不孕	2.93	≤24	24	女方因素	10	6.79	2897	0.29	8	6.71	5.83	46.43	1	12	8	A-B	IVF	2	0	1	0	0	0	0	否	否	全胚冷冻
226	0	C00019096	张景博	≥35	36	2	拮抗剂方案	2	272.5	≤10天	10	≤3000	2725	HCG	3	0	0	原发不孕	1.69	≤24	19.2	女方因素	8	0.73	1530.8.	0.58	7	12.25	5.83	34.07	2	11	12.5	A	IVF	5	0	4	3	0	0	0	否	否	全胚冷冻
638	1	2016030282	孙丽朋	＜35	34	5	降调节方案	3	354.545	＞10天	11	＞3000	3900	HCG	5	1	1	原发不孕	1.48	≤24	23.5	男方因素	6	2.47	1184	0.75	7	9.51	5.83	69.73	1	12	8.7	B	ICSI	5	0	4	4	0	0	0	否	否	全胚冷冻
1084	0	C00007135	王娟	≥35	51	1	拮抗剂方案	2	283.333	＞10天	12	＞3000	3400	HCG	1	1	1	继发不孕	0.2	＞24	30.1	女方因素	4	3.19	1505	0.5	5	11.76	5.83	29	4	5	11.5	A	IVF	4	0	2	0	2	2	0	否	是	移植	未妊娠
1798	0	C00018249	傅琳	≥35	42	3	拮抗剂方案	2	225	≤10天	7	≤3000	1575	双扳机	1	1	0	继发不孕	1.10	≤24	23.1	混合因素	2	5.37	544.86	0.48	2	15.78	5.83	65	4	7	10.3	A	ICSI	2	0	2	2	0	0	0	否	否	全胚冷冻
1847	1	C00012026	傅琳	≥35	41	1	拮抗剂方案	2	371.875	≤10天	8	≤3000	2975	HCG	5	0	0	原发不孕	0.30	≤24	23.1	女方因素	2	15.31	435	0.61	2	15.78	5.83	65	4	6	1.13	A	IVF	2	0	1	0	1	1	0	否	是	移植	已妊娠	临床妊娠	宫外妊娠	异位妊娠
1912	1	C00008575	王娟	≥35	51	2	拮抗剂方案	2	387.5	≤10天	10	＞3000	3875	HCG	1	1	1	继发不孕	0.89	＞24	30.1	女方因素	2	3.4	499.54	0.87	2	11.76	5.83	29	4	3	12.8	A	IVF	0	0	1	0	0	0	0	否	否	全胚冷冻
1586	1	2018030302	韩芬芬	＜35	28	2	拮抗剂方案	2	344.444	＞10天	18	＞3000	6200	HCG	2	0	0	原发不孕	1.3	≤24	22.1	混合因素	3	2.04	1036	1.15	2	8.49	5.84	22.54	1	8	18.9	C	ICSI	1	0	0	0	0	0	0	是		无可移植胚胎
1026	1	C00016009	高娟	≥35	38	1	降调节方案	3	337.5	＞10天	12	＞3000	4050	HCG	7	0	0	原发不孕	1.41	≤24	21.9	女方因素	4	1.36	1159	0.93	3	11.17	5.85	32	2	10	12	B	IVF	0	0	1	0	1	1	0	否	是	移植	未妊娠
1548	0	2016010089	孙玉霞	≥35	45	4	刺激方案	1	150	≤10天	6	≤3000	900	HCG	2	3	1	继发不孕	0.29	＞24	25.7	混合因素	3	12.27	1161	1.48	3	15.34	5.85	45.42	4	4	8.4	B	ICSI	1	0	1	0	0	0	0	否	否	全胚冷冻
1623	0	C00007819	孟红霞	≥35	46	1	刺激方案	1	162.5	≤10天	6	≤3000	975	双扳机	1	3	1	继发不孕	0.93	≤24	22.1	混合因素	2	8.05	939	0.54	2	7.25	5.85	66	4	8	0.52	B	ICSI	2	0	2	0	0	0	0	否	否	全胚冷冻
2076	1	2016100002	邵萍	≥35	44	1	降调节方案	3	393.75	＞10天	16	＞3000	6300	HCG	1	6	1	原发不孕	0.13	≤24	20.2	混合因素	1	8.27	534	1.06	1	10.95	5.85	36.43	4	3	6.9	A	ICSI	2	0	2	0	0	0	0	否	否	全胚冷冻
40	0	2017100151	程爽	≥35	41	1	降调节方案	3	211.364	＞10天	11	≤3000	2325	HCG	1	2	1	继发不孕	2.21	≤24	20.8	女方因素	9	1.73	2304	0.86	9	5.5	5.86	31.75	2	15	11.3	A	IVF	6	0	4	3	0	0	0	否	否	全胚冷冻
68	0	C00009520	陈紫	≥35	39	1	拮抗剂方案	2	172.5	＞10天	11	≤3000	1897.5	HCG	4	0	0	原发不孕	3.49	≤24	22.3	混合因素	9	2.82	2522	0.75	8	6.29	5.86	25	2	20	7.6	B	ICSI	5	0	3	0	0	0	0	否	否	全胚冷冻
110	1	C00017049	申燕燕	＜35	32	1	拮抗剂方案	2	304.545	＞10天	11	＞3000	3350	HCG	2	3	1	继发不孕	2.77	≤24	20.2	女方因素	6	0.67	1775	1.4	8	6.86	5.86	41	1	13	14.5	A	IVF	8	1	5	2	2	2	0	否	是	移植	未妊娠
468	1	2017010013	张伟丽	≥35	39	2	降调节方案	3	300	≤10天	8	≤3000	2400	HCG	3	1	1	继发不孕	2.08	≤24	24	混合因素	6	11.02	1835	1.5	6	6.86	5.86	41	2	10	9.1	B	ICSI	2	0	2	0	0	0	0	否	否	全胚冷冻
481	0	2018010071	孙俪	≥35	46	2	降调节方案	3	187.5	＞10天	12	≤3000	2250	HCG	3	1	1	继发不孕	0.57	≤24	23.4	混合因素	6	3.59	1722	1.36	7	9.9	5.86	44	4	8	8.7	A	ICSI	6	0	2	1	0	0	0	否	否	全胚冷冻
545	0	2016020094	马晓燕	＜35	24	1	降调节方案	3	200	＞10天	13	≤3000	2600	HCG	1	0	0	原发不孕	3.07	≤24	22.3	女方因素	6	4.92	1998	1.14	6	9.9	5.86	44	1	16	19.3	A	IVF	4	0	2	0	0	0	0	否	否	全胚冷冻
799	1	C00018465	王娟	≥35	42	2	拮抗剂方案	2	328.125	≤10天	8	≤3000	2625	HCG	5	4	2	继发不孕	0.98	≤24	20.7	女方因素	5	4.32	1631.13	0.77	5	9.9	5.86	44	4	6	8.6	A-B	IVF	3	0	0	0	0	0	0	是		无可移植胚胎
824	1	C00017413	王娟	≥35	41	1	拮抗剂方案	2	315	＞10天	15	＞3000	4725	双扳机	5	4	2	继发不孕	1.23	≤24	20.7	女方因素	5	4.14	1469	2.35	3	9.9	5.86	44	2	7	8.7	A	IVF	0	0	0	0	0	0	0	是		无可移植胚胎
992	1	2017030255	郭英霞	≥35	41	2	降调节方案	3	321.429	＞10天	14	＞3000	4500	HCG	1	2	1	继发不孕	1.46	＞24	30.8	女方因素	4	1.15	1308	0.47	4	7.75	5.86	16	2	8	9	A	IVF	2	0	1	1	1	1	0	否	是	移植	未妊娠
1170	1	C00008542	秦红艳	≥35	38	2	拮抗剂方案	2	317.5	≤10天	10	＞3000	3175	HCG	4	0	0	原发不孕	1.43	≤24	23.6	女方因素	4	2.92	1185	0.62	3	6.86	5.86	41	2	11	13.9	B	IVF	2	0	2	0	2	2	0	否	是	移植	未妊娠
1569	1	C00006730	秦红艳	≥35	38	1	拮抗剂方案	2	375	≤10天	9	＞3000	3375	HCG	4	0	0	原发不孕	1.73	≤24	23.6	女方因素	3	10.73	1082	0.89	4	6.86	5.86	41	2	11	17	B	IVF	4	0	0	0	0	0	0	是		无可移植胚胎
1617	1	2016060186	肖秀红	≥35	43	1	刺激方案	1	347.727	＞10天	11	＞3000	3825	HCG	6	0	0	继发不孕	0.45	≤24	22.6	女方因素	2	6.14	961	1.23	2	6.45	5.86	32.76	4	6	8	A-B	IVF	2	0	2	2	2	2	0	否	是	移植	已妊娠	临床妊娠	宫内妊娠	单胎宫内妊娠
278	0	2016070176	杨娜	＜35	26	1	拮抗剂方案	2	166.667	≤10天	9	≤3000	1500	HCG	3	0	0	原发不孕	1.840	≤24	22	女方因素	7	2.29	2120	2.1	7	5.34	5.87	57	1	18	11.7	B	IVF	4	0	4	1	0	0	0	否	否	全胚冷冻
1467	0	2017030088	张艳	≥35	42	1	降调节方案	3	238.636	＞10天	11	≤3000	2625	HCG	3	2	1	继发不孕	0.09	＞24	24.6	女方因素	3	4.12	954	0.34	3	11.3	5.87	43.67	4	4	10.2	A	IVF	0	0	0	0	0	0	0	是		未受精
1126	1	2017030260	刘丽娟	＜35	34	2	降调节方案	3	381.818	＞10天	11	＞3000	4200	HCG	1	1	0	原发不孕	1.58	≤24	23.9	女方因素	4	0.78	1360	0.66	3	8.87	5.88	40	1	8	13	A	IVF	2	0	2	1	2	2	0	否	是	移植	已妊娠	临床妊娠	宫外妊娠	异位妊娠
1726	1	C00018804	王颖	≥35	48	4	刺激方案	1	300	≤10天	8	≤3000	2400	HCG	4	3	1	继发不孕	0.806	＞24	24.6	女方因素	2	10.39	692.14	2.78	1	8.87	5.88	40	4	3	3.8	B	IVF	0	0	0	0	0	0	0	是		无可移植胚胎
1777	0	2018030237	郑秋玲	≥35	37	1	刺激方案	1	150	≤10天	8	≤3000	1200	HCG	8	3	1	继发不孕	2.46	＞24	26.7	女方因素	2	4.6	590	1.04	3	14.8	5.88	53	2	7	10	A	IVF	1	0	1	0	1	1	0	否	是	移植	未妊娠
1806	0	C00004469	郑秋玲	≥35	37	2	刺激方案	1	150	＞10天	11	≤3000	1650	HCG	8	3	1	继发不孕	1.51	＞24	26.7	女方因素	2	17.2	532	2.09		14.8	5.88	23	2	7	12.8	A-B		0	0	0	0	0	0	0	是		未取卵
43	1	C00006644	时均霞	≥35	44	3	降调节方案	3	311.538	＞10天	13	＞3000	4050	HCG	3	2	1	继发不孕	1.29	＞24	25.8	混合因素	9	1.12	2187	0.78	7	11.56	5.89	33.77	2	12	1.05	A	ICSI	3	0	2	0	2	2	0	否	是	移植	未妊娠
350	0	2016090169	李莹	≥35	40	1	降调节方案	3	262.5	＞10天	12	＞3000	3150	HCG	6	0	0	原发不孕	1.47	＞24	26.3	女方因素	7	2.18	1854	0.51	7	9.44	5.89	80.74	2	11	12	A-B	IVF	5	0	4	3	2	2	0	否	是	移植	已妊娠	临床妊娠	宫内妊娠	单胎宫内妊娠
351	0	2016050070	赵佳	≥35	35	1	降调节方案	3	285.577	＞10天	13	＞3000	3712.5	HCG	8	2	0	继发不孕	1.34	＞24	24.3	女方因素	7	2.72	1852	0.76	6	7.06	5.89	80.74	2	8	13	A-B	IVF	1	0	1	0	0	0	0	否	否	全胚冷冻
2150	1	2016040022	刘莹	＜35	28	1	降调节方案	3	292.5	≤10天	10	≤3000	2925	HCG	4	1	0	继发不孕	0.48	＞24	29.3	女方因素	1	5.83	373	0.72	0	9.8	5.89	86.43	3	3	12	A		0	0	0	0	0	0	0	是		未取到卵
2206	0	2016090175	刘莹	＜35	28	4	刺激方案	1	262.5	≤10天	4	≤3000	1050	HCG	4	1	0	继发不孕	0.91	＞24	29.3	女方因素	1	2.66	250	0.59	1	9.8	5.89	86.43	3	3	10	A	IVF	0	0	0	0	0	0	0	是		无可移植胚胎
55	1	2016030303	王淑珍	≥35	43	2	刺激方案	1	325	≤10天	9	≤3000	2925	HCG	1	8	1	继发不孕	2.71	≤24	20.3	混合因素	9	2.18	2839	1.22	8	9.78	5.9	63.36	2	11	6.5	B	ICSI	4	0	2	1	0	0	0	否	否	全胚冷冻
248	1	2016070156	郑香华	≥35	48	1	刺激方案	1	356.25	＞10天	12	＞3000	4275	HCG	13	2	1	继发不孕	1.24	＞24	25.7	混合因素	7	6.87	1864	0.42	5	10.67	5.9	59.09	2	6	12.5	A	ICSI	3	0	2	1	2	2	0	否	是	移植	已妊娠	临床妊娠	宫内妊娠	单胎宫内妊娠
713	1	C00010122	李永艳	≥35	39	1	拮抗剂方案	2	375	≤10天	7	≤3000	2625	HCG	6	0	0	继发不孕	1.92	＞24	27.6	男方因素	5	5.56	1622	1.16	8	7.39	5.9	28	2	15	9.2	A	IVF	4	0	2	1	2	2	0	否	是	移植	未妊娠
2245	0	2016030157	修春苗	≥35	43	1	降调节方案	3	242.308	＞10天	13	＞3000	3150	HCG	1	2	1	继发不孕	0.11	≤24	20.7	男方因素	1	5.56	402	0.82	2	15.2	5.9	36.7	4	3	8.5	A	ICSI	2	0	2	0	2	2	0	否	是	移植	未妊娠
1096	1	C00015652	解玉萍	＜35	29	1	拮抗剂方案	2	313.889	≤10天	9	≤3000	2825	HCG	5	0	0	原发不孕	2.60	＞24	27.6	女方因素	4	2.07	1456	1.41	5	7.53	5.91	45	1	10	18.8	A	IVF	3	0	2	0	0	0	0	否	否	全胚冷冻
338	1	2016020118	姚玉芳	＜35	34	1	降调节方案	3	294.643	＞10天	14	＞3000	4125	HCG	5	0	0	原发不孕	1.80	＞24	31.2	女方因素	7	1.46	1971	1.58	8	7.78	5.92	44.67	1	14	9.6	B	IVF	6	0	2	0	2	2	0	否	是	移植	未妊娠
1046	1	C00016380	王立赛	＜35	31	1	降调节方案	3	397.5	≤10天	10	＞3000	3975	HCG	1	0	0	原发不孕	1.54	≤24	23.8	混合因素	4	4.29	1769	1.13	4	10.56	5.92	41.61	1	8	12.2	A	ICSI	1	1	2	0	1	1	0	否	是	移植	未妊娠
1089	0	2017030165	牛玉	≥35	37	1	降调节方案	3	288.462	＞10天	13	＞3000	3750	HCG	1	2	1	继发不孕	2.44	≤24	23.6	女方因素	4	2.29	1488	0.56	3	8.56	5.92	41.61	2	9	12.5	B	IVF	1	0	0	0	0	0	0	是		无可移植胚胎
128	0	2017070089	王瑞雪	＜35	30	3	降调节方案	3	150	≤10天	10	≤3000	1500	HCG	2	0	0	继发不孕	23.10	≤24	21.4	男方因素	8	0.45	1927	0.51	4	6.82	5.93	31	1	14	10.8	A	ICSI	4	0	2	0	2	2	0	否	是	移植	未妊娠
189	0	C00012259	鞠潇慧	＜35	31	1	拮抗剂方案	2	246.429	≤10天	7	≤3000	1725	HCG	3	0	0	原发不孕	3.55	≤24	20.1	女方因素	8	3.38	2131	0.98	6	5.2	5.93	36.43	1	13	9.6	A	IVF	3	2	4	1	2	2	0	否	是	移植	已妊娠	临床妊娠	宫内妊娠	双胎宫内妊娠
514	1	C00008726	仪美娟	≥35	38	3	降调节方案	3	351.923	＞10天	13	＞3000	4575	HCG	3	3	1	继发不孕	2.79	＞24	24.2	混合因素	6	1.46	2300	0.27	8	6.19	5.93	40	2	12	12.2	B-C	ICSI	5	0	4	2	2	2	0	否	是	移植	已妊娠	临床妊娠	宫内妊娠	双胎宫内妊娠
581	0	2018030132	田敏	≥35	36	2	拮抗剂方案	2	225	≤10天	10	≤3000	2250	HCG	5	1	1	继发不孕	1.28	≤24	20.8	不明原因	6	3.73	1631	1.3	4	6.19	5.93	40	2	9	10.3	A	ICSI	4	0	2	1	1	1	0	否	是	移植	未妊娠
971	1	C00015792	潘来恩	＜35	29	2	刺激方案	1	300	＞10天	12	＞3000	3600	HCG	2	0	0	原发不孕	1.43	＞24	25.6	女方因素	4	9.76	1386	1.49	3	4.75	5.93	76.43	1	9	7.5	A	IVF	2	0	1	0	0	0	0	否	否	全胚冷冻
972	0	C00013208	潘来恩	＜35	28	1	刺激方案	1	225	≤10天	8	≤3000	1800	HCG	2	0	0	原发不孕	2.47	＞24	25.6	女方因素	4	2.14	1386	0.52	3	4.75	5.93	86.43	1	9	7.4	A-B	IVF	1	0	2	0	2	2	0	否	是	移植	未妊娠
1445	1	2016030293	李玉菊	≥35	39	3	刺激方案	1	300	≤10天	8	≤3000	2400	HCG	6	1	1	继发不孕	0.69	≤24	22.7	女方因素	3	9.8	911	0.54	4	12.67	5.94	74.98	4	5	10	B	IVF	2	0	2	2	2	2	0	否	是	移植	已妊娠	临床妊娠	宫内妊娠	单胎宫内妊娠
1794	0	C00016594	颜宁宁	≥35	43	1	刺激方案	1	230.769	＞10天	13	≤3000	3000	HCG	8	3	2	继发不孕	0.80	＞24	25	女方因素	2	16.31	551	0.55	2	6.94	5.94	91	4	3	6.3	B-C	IVF	2	0	2	1	0	0	0	否	否	全胚冷冻
1958	1	2016030044	李玉菊	≥35	39	2	刺激方案	1	300	≤10天	8	≤3000	2400	HCG	6	1	1	继发不孕	0.69	≤24	22.7	女方因素	2	3.88	490	0.49	2	12.67	5.94	74.98	4	5	5.9	A-B	IVF	1	0	1	0	0	0	0	否	否	全胚冷冻
1874	0	2018030093	季洪芹	≥35	35	2	刺激方案	1	150	≤10天	7	≤3000	1050	HCG	6	2	1	继发不孕	2.54	＞24	27.1	女方因素	2	7.82	338	0.47	2	9.7	5.95	44.67	2	13	4.9	B	IVF	1	0	1	0	0	0	0	否	否	全胚冷冻
1298	1	2018040201	杨红霞	≥35	40	1	拮抗剂方案	2	350	＞10天	12	＞3000	4200	HCG	4	1	0	继发不孕	1.5	＞24	26.3	男方因素	3	6.79	781	2.11	3	16.27	5.96	54.91	2	6	13.7	A	ICSI	1	0	0	0	0	0	0	是		无可移植胚胎
2192	0	2017120143	李玉娥	≥35	46	2	刺激方案	1	150	≤10天	7	≤3000	1050	HCG	10	3	1	继发不孕	0.37	≤24	22.4	女方因素	1	2.02	277	0.76	1	15.06	5.96	59	4	3	9	A	IVF	1	0	1	0	0	0	0	否	否	全胚冷冻
558	1	2016060237	高巍	≥35	36	2	降调节方案	3	427.5	≤10天	10	＞3000	4275	HCG	1	0	0	原发不孕	2.59	≤24	20.4	不明原因	6	0.8	1848	1.17	6	3.03	5.97	46.43	2	16	6.8	B	ICSI	5	0	4	1	0	0	0	否	否	全胚冷冻
1920	0	C00017669	谭焕娟	≥35	39	1	拮抗剂方案	2	275	≤10天	9	≤3000	2475	HCG	1	1	0	继发不孕	1.26	≤24	19.3	女方因素	2	5.84	480	1.28	4	12.64	5.97	84	2	8	11.7	A	IVF	4	0	1	0	0	0	0	否	否	全胚冷冻
22	0	2016030017	田晓琼	＜35	32	1	降调节方案	3	240	＞10天	15	＞3000	3600	HCG	10	0	0	原发不孕	1.98	≤24	20.3	女方因素	10	0.88	1839	3.6	9	7.53	5.98	80.74	1	11	12.8	A	IVF	4	0	2	1	0	0	0	否	否	全胚冷冻
288	1	2016100185	张桂芳	≥35	39	1	刺激方案	1	300	≤10天	7	≤3000	2100	HCG	2	7	1	继发不孕	1.61	≤24	17.4	女方因素	7	1.92	1872	1.72	7	7.7	5.98	35.42	2	10	8.5	A	IVF	0	0	0	0	0	0	0	是		无可移植胚胎
489	0	2018060158	亓万芸	≥35	36	1	降调节方案	3	216.176	＞10天	17	＞3000	3675	HCG	1	5	1	继发不孕	1.99	＞24	25	不明原因	6	1.41	2578	1.38	6	7.49	5.98	77.07	2	15	7.4	A	IVF	4	0	0	0	0	0	0	是		无可移植胚胎
1864	1	C00017935	邓秀芝	≥35	42	3	刺激方案	1	300	≤10天	6	≤3000	1800	HCG	1	3	1	继发不孕	1.37	≤24	21.5	女方因素	2	12.56	366	2.53	4	4.63	5.98	46.43	2	9	0.72	B	IVF	2	0	1	0	0	0	0	否	否	全胚冷冻
20	1	C00004604	焉兆玥	＜35	30	2	降调节方案	3	300	＞10天	12	＞3000	3600	HCG	3	1	0	继发不孕	2.35	≤24	23.3	女方因素	10	1.12	2132	1.18	5	7.36	5.99	33.77	1	12	1.46	A	IVF	2	2	3	0	0	0	0	否	否	全胚冷冻
415	0	C00003524	尹彦梅	＜35	32	1	降调节方案	3	277.5	≤10天	10	≤3000	2775	HCG	1	3	0	继发不孕	2.43	＞24	24.7	女方因素	7	1.22	1163	1.14	6	4.43	5.99	48	1	14	1.77	B	IVF	6	0	3	3	0	0	0	否	否	全胚冷冻
539	1	2017020144	张立群	≥35	45	1	刺激方案	1	402.273	＞10天	11	＞3000	4425	HCG	2	2	1	继发不孕	1.11	＞24	28.8	女方因素	6	2.28	2039	0.89	4	12.8	5.99	78.38	4	5	10.9	B	IVF	3	0	2	1	0	0	0	否	否	全胚冷冻
767	1	2016030279	尹焕平	≥35	38	4	降调节方案	3	300	≤10天	6	≤3000	1800	HCG	3	1	1	继发不孕	2.18	≤24	19.2	女方因素	5	3.89	1817	0.34	7	8.74	5.99	34.76	2	12	10.6	A	IVF	6	0	2	0	2	2	0	否	是	移植	未妊娠
1022	0	C00006271	任丽云	≥35	40	1	刺激方案	1	225	≤10天	8	≤3000	1800	双扳机	3	1	0	继发不孕	1.7	≤24	19.9	女方因素	4	3.77	1185	0.52	6	8.17	5.99	81	2	10	0.72	B	IVF	3	0	4	1	0	0	0	否	否	全胚冷冻
1373	0	C00011998	王田田	＜35	27	1	降调节方案	3	187.5	≤10天	10	≤3000	1875	HCG	1	2	0	继发不孕	0.43	＞24	27.3	女方因素	3	9.28	468	1.16	2	10.61	5.99	20	3	5	6.8	A-B	IVF	0	0	0	0	0	0	0	是		无可移植胚胎
1394	1	2016080073	吴倩	≥35	43	1	拮抗剂方案	2	403.125	≤10天	8	＞3000	3225	HCG	3	2	1	继发不孕	0.72	≤24	19.5	混合因素	3	4.83	897	0.28	1	15.07	5.99	91.75	4	5	10.5	A	ICSI	1	0	0	0	0	0	0	是		无可移植胚胎
1536	0	2016020050	蒋姗	＜35	34	1	刺激方案	1	225	≤10天	7	≤3000	1575	HCG	9	0	0	原发不孕	0.6	≤24	18.8	不明原因	3	2.2	1193	0.71	3	10.58	5.99	56.76	3	5	11.3	A	IVF	3	0	3	2	2	2	0	否	是	移植	已妊娠	临床妊娠	宫内妊娠	单胎宫内妊娠
1621	1	C00007140	许世娜	≥35	36	6	刺激方案	1	450	＞10天	11	＞3000	4950	HCG	6	0	0	原发不孕	0.194	≤24	18.4	女方因素	2	12.14	945	1	1	8.24	5.99	76.43	4	5	0.75	B	IVF	0	0	0	0	0	0	0	是		无可移植胚胎
2185	1	C00004521	许世娜	≥35	35	2	刺激方案	1	383.333	≤10天	9	＞3000	3450	HCG	6	0	0	原发不孕	1.06	≤24	18.4	女方因素	1	18.69	293	1.53	0	8.24	5.99	96.43	4	5	0.71	B		0	0	0	0	0	0	0	是		未取到卵
1230	1	C00015632	王小燕	≥35	38	2	刺激方案	1	300	≤10天	7	≤3000	2100	HCG	4	3	1	继发不孕	2.28	≤24	18.4	女方因素	3	1.97	969	1.08	2	11.33	6	65	2	8	0.55	A-B	IVF	1	0	1	1	0	0	0	否	否	全胚冷冻
2208	1	2016090184	袁红彬	≥35	45	4	降调节方案	3	428.571	≤10天	7	≤3000	3000	HCG	5	6	1	继发不孕	0.2	＞24	24.4	混合因素	1	32.95	245	1.4	2	7.32	6	52	4	3	7.2	B-C	ICSI	3	0	2	1	0	0	0	否	否	全胚冷冻
437	0	C00016241	张华	≥35	37	3	拮抗剂方案	2	200	≤10天	7	≤3000	1400	HCG	8	0	0	原发不孕	1.6	≤24	20	混合因素	6	10.89	736	0.76	5	9.41	6.01	89	2	11			ICSI	2	0	2	0	2	2	0	否	是	移植	未妊娠
649	0	2016040111	魏玉姣	＜35	25	1	降调节方案	3	263.393	＞10天	14	＞3000	3687.5	HCG	3	1	0	继发不孕	3.94	＞24	26.7	女方因素	5	1.24	839	1.21	3	6.56	6.01	38.65	1	11	13.5	B	IVF	2	0	1	0	1	1	0	否	是	移植	未妊娠
839	0	2017090034	张馨元	≥35	39	1	拮抗剂方案	2	250	＞10天	15	＞3000	3750	HCG	1	1	1	继发不孕	1.1	≤24	24	混合因素	5	1.04	1398	1.2	4	7.57	6.01	26	4	6	13.6	B	ICSI	1	0	1	0	0	0	0	否	否	全胚冷冻
484	1	C00016099	李丹	＜35	33	1	降调节方案	3	337.5	＞10天	14	＞3000	4725	HCG	3	0	0	原发不孕	1.69	≤24	19.5	女方因素	6	0.52	1650	1.51	4	8.67	6.02	43.78	1	11	12.8	A	IVF	4	1	3	1	0	0	0	否	否	全胚冷冻
1432	0	C00015840	李秀梅	≥35	40	3	拮抗剂方案	2	257.143	≤10天	7	≤3000	1800	HCG	5	2	1	继发不孕	1.51	＞24	24.8	混合因素	3	1.96	946	0.9	3	14.86	6.02	62	2	8	5.3	A	ICSI	3	0	2	0	0	0	0	否	否	全胚冷冻
1925	1	C00019040	李秀梅	≥35	40	5	拮抗剂方案	2	450	＞10天	13	＞3000	5850	HCG	6	2	1	继发不孕	0.11	＞24	24.8	女方因素	2	30.97	468	1.93	1	14.86	6.02	62	4	4	9.5	A	IVF	0	0	0	0	0	0	0	是		无可移植胚胎
2027	0	C00018605	李秀梅	≥35	40	4	刺激方案	1	150	≤10天	8	≤3000	1200	HCG	6	2	1	继发不孕	0.22	＞24	24.8	混合因素	1	22.66	727.68	1.04	1	14.86	6.02	62	4	2	4.6	B	ICSI	1	0	0	0	0	0	0	是		无可移植胚胎
496	1	C00010819	宁存霞	≥35	45	2	刺激方案	1	450	＞10天	11	＞3000	4950	HCG	7	3	1	继发不孕	1.33	＞24	28.8	女方因素	6	3.85	2511	1.09	6	16.85	6.03	10	2	12	0.51	A-B	IVF	4	0	1	0	0	0	0	否	否	全胚冷冻
116	0	2017030089	翟爽	＜35	32	2	降调节方案	3	150	＞10天	11	≤3000	1650	HCG	3	0	0	原发不孕	1.7	≤24	23.8	混合因素	9	1.37	1550	0.8	6	5.66	6.04	29.86	1	18	14	A	ICSI	3	0	1	0	1	1	0	否	是	移植	已妊娠	临床妊娠	宫内妊娠	单胚胎停
939	1	C00005290	王金燕	≥35	43	2	拮抗剂方案	2	375	≤10天	10	＞3000	3750	HCG	6	1	0	继发不孕	1.68	≤24	22.7	混合因素	8	1.4	1794	3.47	7	10.99	6.04	102	2	11	1	A	ICSI	7	0	7	5	0	0	0	否	否	全胚冷冻
1409	1	C00016349	董福香	≥35	37	1	降调节方案	3	367.308	＞10天	13	＞3000	4775	HCG	5	3	1	继发不孕	3.03	＞24	24.6	女方因素	3	1.57	866.61	1.26	4	7.47	6.04	56.76	2	8	10.3	A-B	IVF	1	0	1	1	0	0	0	否	否	全胚冷冻
152	1	C00008463	刘明雪	≥35	40	2	降调节方案	3	294.643	＞10天	14	＞3000	4125	HCG	5	3	1	继发不孕	2.37	＞24	26.7	女方因素	8	1.48	1935	0.69	9	14.08	6.07	31	2	10	8.9	A	IVF	6	0	2	0	2	2	0	否	是	移植	已妊娠	临床妊娠	宫内妊娠	单胚胎停
169	1	C00018274	张俊丽	＜35	33	2	刺激方案	1	300	≤10天	7	≤3000	2100	HCG	2	3	2	继发不孕	1.79	≤24	23.4	女方因素	8	2.89	2538.44	0.68	7	7.88	6.07	29.41	1	14	10.3	A	IVF	5	0	4	0	0	0	0	否	否	全胚冷冻
1159	0	C00004257	刘明雪	≥35	39	1	拮抗剂方案	2	225	≤10天	8	≤3000	1800	双扳机	5	3	1	继发不孕	0.92	＞24	26.7	女方因素	4	3.46	1230	0.53	3	14.08	6.07	91	4	7	10.4	A-B	IVF	2	0	2	1	0	0	0	否	否	全胚冷冻
2067	0	2017030176	林青荣	≥35	44	1	刺激方案	1	190.909	＞10天	11	≤3000	2100	HCG	2	3	1	继发不孕	0.26	＞24	26.6	女方因素	1	8	573	0.29	1	13.89	6.07	24	4	2	8.4	B	IVF	1	0	0	0	0	0	0	是		无可移植胚胎
1684	1	C00008796	武睿燕	≥35	36	1	刺激方案	1	330	≤10天	10	＞3000	3300	HCG	4	0	0	原发不孕	2.16	≤24	18.4	女方因素	2	23.95	788	1.22	3	7.18	6.08	43.54	2	9	5.5	A	IVF	1	0	0	0	0	0	0	是		无可移植胚胎
203	0	2017010065	周静	≥35	37	1	降调节方案	3	200	≤10天	9	≤3000	1800	HCG	1	1	1	继发不孕	2.79	≤24	22.3	女方因素	8	3.06	1877	1.63	7	7.57	6.09	44	2	12	18	A	IVF	5	0	2	1	2	2	0	否	是	移植	未妊娠
2105	1	2018070121	孟晓卉	≥35	36	1	降调节方案	3	339.583	＞10天	12	＞3000	4075	HCG	2	1	1	继发不孕	1.67	≤24	18.4	女方因素	1	0.81	458	0.68	2	10.2	6.09	45.27	2	7	7.4	A	IVF	2	0	2	1	1	1	0	否	是	移植	未妊娠
1924	0	2016050131	刘桂华	≥35	37	1	降调节方案	3	281.25	＞10天	12	＞3000	3375	HCG	4	1	1	继发不孕	2.3	≤24	19.5	不明原因	2	1.03	469	0.95	3	7.48	6.1	25.42	2	8	8	A	IVF	2	0	0	0	0	0	0	是		无可移植胚胎
431	1	C00018588	王占香	≥35	42	2	拮抗剂方案	2	300	≤10天	9	≤3000	2700	HCG	2	4	2	继发不孕	1.3	＞24	24.9	女方因素	6	5.72	891.3	0.68	5	10.52	6.12	63	2	8	11.2	A	IVF	4	0	4	2	2	2	0	否	是	移植	未妊娠
1100	0	2018050051	张莹莹	＜35	28	2	刺激方案	1	231.25	＞10天	12	≤3000	2775	HCG	2	0	0	原发不孕	2.1	≤24	20.8	女方因素	4	0.99	1446	0.42	0	14.38	6.12	40	1	9	12.6	A		0	0	0	0	0	0	0	是		未取到卵
1285	1	2017030250	王慧	≥35	40	1	刺激方案	1	334.615	＞10天	13	＞3000	4350	HCG	7	3	1	继发不孕	1.41	＞24	30.1	女方因素	3	6.34	819	0.59	2	7.38	6.12	40	2	9	16	A-B	IVF	1	0	0	0	0	0	0	是		无可移植胚胎
1656	1	2017010066	张新云	≥35	46	4	刺激方案	1	476.786	＞10天	14	＞3000	6675	HCG	2	5	1	继发不孕	0.87	＞24	26.2	男方因素	2	7.07	849	1.1	2	16.38	6.12	74.64	4	3	8.5	B	ICSI	1	0	0	0	1	1	0	否	是	移植	未妊娠
1835	1	C00012198	王瑞	＜35	29	2	拮抗剂方案	2	354.167	≤10天	9	＞3000	3187.5	HCG	3	0	0	原发不孕	1.24	＞24	28	女方因素	2	9.12	477	1.1	1	14.38	6.12	40	1	6	1.13	B	IVF	0	0	0	0	0	0	0	是		未受精
1894	0	2016080053	张新云	≥35	45	3	拮抗剂方案	2	139.286	≤10天	7	≤3000	975	HCG	2	5	1	继发不孕	0.67	＞24	26.2	女方因素	2	9.23	196	2.11	0	16.38	6.12	74.64	4	3	9.4	B		0	0	0	0	0	0	0	是		未取到卵
1967	0	C00017427	王占香	≥35	42	1	刺激方案	1	272.727	＞10天	11	≤3000	3000	HCG	2	4	2	继发不孕	1.48	＞24	24.9	女方因素	2	13.15	468	0.95	2	10.52	6.12	63	2	8	6	B	IVF	1	0	0	0	0	0	0	是		无可移植胚胎
2270	0	2017120086	张莹莹	＜35	27	1	拮抗剂方案	2	150	≤10天	7	≤3000	1050	HCG	2	0	0	原发不孕	0.91	≤24	20.8	女方因素	1	8.56	315	0.56	0	14.38	6.12	40	3	4				0	0	0	0	0	0	0	是		未取到卵
559	1	C00017488	王颖	≥35	42	1	拮抗剂方案	2	317.5	≤10天	10	＞3000	3175	HCG	3	1	1	原发不孕	1.69	≤24	20.3	女方因素	6	1.35	1846.72	1.64	6	9.05	6.13	43	2	9	9.7	A-B	IVF	4	0	2	0	2	2	0	否	是	移植	未妊娠
1291	0	2016060213	于艳	≥35	36	1	降调节方案	3	225	≤10天	8	≤3000	1800	HCG	2	4	1	继发不孕	0.4	≤24	21.7	女方因素	3	0.38	804	0.61	6	9.05	6.13	43	4	6	13.8	A-B	IVF	5	0	2	0	0	0	0	否	否	全胚冷冻
2012	0	2016040255	郑伟	≥35	37	5	刺激方案	1	262.5	≤10天	8	≤3000	2100	HCG	4	0	0	原发不孕	0.65	≤24	22.2	混合因素	1	14.58	842	0.67	1	12.45	6.13	24	4	4	5.6	B	ICSI	1	0	1	0	0	0	0	否	否	全胚冷冻
2244	0	2016010135	郑伟	≥35	37	4	刺激方案	1	234.375	＞10天	16	＞3000	3750	双扳机	5	0	0	原发不孕	0.47	≤24	22.2	混合因素	1	11.74	324	0.8	1	12.45	6.13	24	4	4	5.6	A	ICSI	1	0	1	0	0	0	0	否	否	全胚冷冻
1028	1	C00004090	蔡云珠	＜35	34	1	刺激方案	1	429.545	＞10天	11	＞3000	4725	双扳机	2	2	1	继发不孕	2.5	＞24	30.5	女方因素	4	4.06	1149	0.42	5	7.95	6.16	75.13	1	15	8.3	B	IVF	3	0	1	0	0	0	0	否	否	全胚冷冻
1176	0	2016070009	刘汉婕	≥35	40	1	降调节方案	3	262.5	≤10天	10	≤3000	2625	HCG		0	0	原发不孕	0.43	＞24	24.1	女方因素	4	8.98	1149	1.09	1	17.83	6.16	79.35	4	3	16	A	IVF	1	0	1	0	1	1	0	否	是	移植	未妊娠
914	1	C00014913	赵云惠	≥35	42	2	刺激方案	1	300	＞10天	13	＞3000	3900	HCG	3	3	1	继发不孕	0.72	≤24	21.3	女方因素	4	8.45	958	2.38	1	8.5	6.17	77.45	4	6	0.93	B	IVF	0	0	0	0	0	0	0	是		无可移植胚胎
989	0	2018060092	陈卫丽	≥35	40	1	降调节方案	3	285	≤10天	10	≤3000	2850	HCG	3	7	2	继发不孕	2.85	≤24	20.7	女方因素	4	1.34	1317	2.72	6	7.2	6.17	53.77	2	9	11.1	A-B	IVF	3	0	2	0	0	0	0	否	否	全胚冷冻
238	0	C00011455	翟继丽	≥35	39	1	拮抗剂方案	2	258.333	≤10天	9	≤3000	2325	HCG	2	3	0	继发不孕	2.2	＞24	24.6	女方因素	8	3.36	1098	0.55	7	8.62	6.19	32	2	12	0.9	A	IVF	4	1	3	1	2	2	0	否	是	移植	未妊娠
872	1	2017120141	唐君峰	≥35	44	3	拮抗剂方案	2	325	≤10天	7	≤3000	2275	HCG	2	1	1	继发不孕	0.47	≤24	23.9	男方因素	5	4.54	1179	0.73	6	9.49	6.19	97.66	4	9	13.7	A	ICSI	3	0	0	0	0	0	0	是		无可移植胚胎
1351	0	C00012952	赵莹莹	＜35	31	1	拮抗剂方案	2	285.714	＞10天	14	＞3000	4000	HCG	1	3	0	继发不孕	1.04	＞24	33.3	女方因素	3	1.65	577	0.45	1	9.45	6.2	45.27	3	7			IVF	1	0	1	1	1	1	0	否	是	移植	已妊娠	临床妊娠	宫内妊娠	单胎宫内妊娠
2018	1	C00007305	刘婷婷	≥35	43	1	拮抗剂方案	2	300	≤10天	5	≤3000	1500	双扳机	2	3	1	继发不孕	0.76	≤24	21.5	女方因素	1	4.04	784	0.42	0	10.58	6.2	45	4	6	1	A		0	0	0	0	0	0	0	是		未取到卵
1	0	2017030012	张花	＜35	25	2	降调节方案	3	141.667	＞10天	18	≤3000	2550	HCG	4	0	0	原发不孕	5.23	＞24	35.1	女方因素	10	1.17	582	0.26	4	3.32	6.21	50.5	1	55	9.3	A-B	IVF	1	0	1	1	1	1	0	否	是	移植	已妊娠	临床妊娠	宫内妊娠	单胎宫内妊娠
400	0	2018020092	刘莉	＜35	27	1	降调节方案	3	150	≤10天	10	≤3000	1500	HCG	1	2	0	继发不孕	2.49	≤24	20.3	女方因素	8	1.31	1934	0.56	9	6.56	6.22	33.77	1	16	12.3	A	IVF	8	0	6	2	0	0	0	否	否	全胚冷冻
433	1	C00013436	刘俊敬	≥35	40	1	降调节方案	3	425	＞10天	12	＞3000	5100	HCG	3	1	1	继发不孕	3.89	＞24	26	女方因素	6	1.12	862	1.96	6	9.78	6.22	40.37	2	15	13.5	B	IVF	6	0	4	1	2	2	0	否	是	移植	已妊娠	临床妊娠	宫内妊娠	单胎宫内妊娠
476	1	2017060074	韩伟伟	＜35	34	1	降调节方案	3	325	＞10天	12	＞3000	3900	HCG	4	2	0	继发不孕	2.36	＞24	31.9	女方因素	8	2.34	1241	1.23	9	5.78	6.22	40.37	1	18	16.6	A	IVF	8	0	6	0	0	0	0	否	否	全胚冷冻
623	1	2018030119	宫晓丽	＜35	28	1	降调节方案	3	322.917	＞10天	12	＞3000	3875	HCG	3	1	0	继发不孕	3.79	≤24	21.8	女方因素	6	1.58	2040	1.4	9	6.78	6.22	40.37	1	11	11.5	B-C	IVF	8	0	6	4	2	2	0	否	是	移植	未妊娠
780	1	2018020050	刘丽娟	≥35	35	3	降调节方案	3	462.5	＞10天	12	＞3000	5550	HCG	1	1	0	继发不孕	2.64	≤24	23.9	女方因素	5	1.18	1755	0.34	4	5.78	6.22	40.37	2	8	12.4	A	IVF	4	0	2	0	2	2	0	否	是	移植	未妊娠
1469	1	2018040065	左云芳	≥35	47	7	刺激方案	1	375	≤10天	9	＞3000	3375	HCG	3	3	1	继发不孕	0.89	≤24	22.1	女方因素	3	12.35	948	1.01	2	19.78	6.22	40.37	4	2	4.2	C	IVF	0	0	1	0	0	0	0	否	否	全胚冷冻
1493	1	2016100059	孙姣姣	＜35	29	2	降调节方案	3	322.5	≤10天	10	＞3000	3225	HCG	6	0	0	原发不孕	1.42	≤24	21.4	男方因素	3	1.75	798	2.47	3	5.78	6.22	40.37	1	12	12	A	ICSI	1	0	1	1	1	1	0	否	是	移植	未妊娠
1496	1	C00009832	高世芹	≥35	39	1	刺激方案	1	450	≤10天	9	＞3000	4050	HCG	4	1	0	继发不孕	0.36	≤24	21	混合因素	3	1.35	961	1.35	2	6.78	6.22	40.37	4	6	0.61	A-B	ICSI	0	0	1	0	0	0	0	否	否	全胚冷冻
1646	0	2017030321	左云芳	≥35	46	5	刺激方案	1	279.545	＞10天	11	＞3000	3075	HCG	1	3	1	继发不孕	0.55	≤24	22.1	混合因素	2	1.44	87	1.1	0	19.78	6.22	40.37	4	2	6			0	0	0	0	0	0	0	是		未取到卵
1762	1	C00004116	槐琳琳	＜35	31	2	降调节方案	3	450	＞10天	11	＞3000	4950	HCG	5	0	0	原发不孕	1.47	≤24	19.6	男方因素	2	0.44	608	0.59	2	5.78	6.22	65.37	1	7	12.3	A	ICSI	2	0	1	0	1	1	0	否	是	移植	未妊娠
2143	1	C00011747	张蒙蒙	＜35	34	1	刺激方案	1	318.75	≤10天	8	≤3000	2550	双扳机	1	0	0	原发不孕	0.79	≤24	22.2	女方因素	1	1.97	383	0.24	1	9.78	6.22	40.37	3	5	7.6	A	IVF	1	0	1	0	0	0	0	否	否	全胚冷冻
2214	0	2016090013	左云芳	≥35	45	4	刺激方案	1	225	≤10天	4	≤3000	900	HCG	1	3	1	继发不孕	0.74	≤24	22.1	女方因素	1	7.85	226	0.51	1	19.78	6.22	40.37	4	2	6.3	B	IVF	0	0	1	0	0	0	0	否	否	全胚冷冻
2240	0	2017080135	左云芳	≥35	46	6	刺激方案	1	150	≤10天	4	≤3000	600	HCG	1	3	1	继发不孕	0.55	≤24	22.1	女方因素	1	9.16	144	0.54	1	19.78	6.22	40.37	4	2	6.5	B	IVF	0	0	0	0	0	0	0	是		无可移植胚胎
1003	1	2018010082	于莉	＜35	29	1	拮抗剂方案	2	296.429	≤10天	7	≤3000	2075	HCG	2	0	0	原发不孕	2.35	≤24	19.6	男方因素	4	2.46	1269	1.56	5	7.71	6.23	41.75	1	8	12.5	A	ICSI	2	0	2	0	0	0	0	否	否	全胚冷冻
1379	0	2018010016	李庆荣	＜35	34	1	刺激方案	1	234.375	≤10天	8	≤3000	1875	HCG	2	0	0	原发不孕	2.24	≤24	23	女方因素	3	17.31	386	1.35	2	8.48	6.23	59.09	1	6	4.4	A	IVF	2	0	2	0	0	0	0	否	否	全胚冷冻
1853	0	2018070072	李庆荣	≥35	35	2	降调节方案	3	250	＞10天	12	≤3000	3000	HCG	2	0	0	原发不孕	0.57	≤24	23	女方因素	2	3.05	417	1.02	2	8.48	6.23	59.09	4	6	10.7	A	IVF	2	0	2	1	2	2	0	否	是	移植	已妊娠	临床妊娠	宫内妊娠	单胎宫内妊娠
377	1	2018030056	马林林	＜35	26	1	刺激方案	1	315	≤10天	10	＞3000	3150	HCG	3	0	0	原发不孕	2.24	≤24	23.4	女方因素	7	17.66	1600	2.64	5	9.09	6.24	83.77	1	10	9.7	A	IVF	0	0	0	0	0	0	0	是		未受精
869	1	C00015183	贾慧	≥35	37	2	降调节方案	3	393.75	≤10天	8	＞3000	3150	HCG	2	1	0	继发不孕	2.76	≤24	21.7	女方因素	5	1.64	1194	1.15	8	11.71	6.24	12.5	2	10	11.5	A	IVF	3	0	2	0	2	2	0	否	是	移植	未妊娠
870	0	C00012037	贾慧	≥35	36	1	降调节方案	3	246.429	＞10天	14	＞3000	3450	HCG	2	1	0	继发不孕	1.91	≤24	21.7	女方因素	5	1.71	1194	0.76	7	11.71	6.24	12.5	2	12	13.9	A	IVF	4	0	2	0	0	0	0	否	否	全胚冷冻
1088	1	C00012620	薛银春	≥35	36	1	降调节方案	3	312.727	＞10天	11	＞3000	3440	HCG	1	2	0	继发不孕	0.6	＞24	30	女方因素	4	10.28	1490	1.06	3	13.41	6.24	53	4	5	13	A	IVF	2	0	2	0	0	0	0	否	否	全胚冷冻
1761	1	C00016624	贾慧	≥35	37	3	降调节方案	3	350	≤10天	9	＞3000	3150	HCG	2	1	0	继发不孕	2.020	≤24	21.7	女方因素	2	2.78	609	1.27	3	11.71	6.24	12.5	2	5	9.4	A	IVF	2	0	2	1	2	2	0	否	是	移植	已妊娠	临床妊娠	宫内妊娠	双胎宫内妊娠
1169	1	2017040101	郇长花	≥35	40	1	刺激方案	1	425	≤10天	5	≤3000	2125	HCG	1	0	0	继发不孕	0.53	＞24	27.2	混合因素	4	9.97	1189	0.93	3	15.28	6.25	55.46	4	5	8.8	B	ICSI	3	0	2	0	2	2	0	否	是	移植	未妊娠
1717	1	C00009742	张金玲	≥35	42	5	拮抗剂方案	2	350	≤10天	9	＞3000	3150	双扳机	2	2	1	继发不孕	0.84	≤24	21.5	女方因素	2	4.54	715	0.33	1	17.81	6.25	31	4	6	6.4	A-B	IVF	1	0	1	0	0	0	0	否	否	全胚冷冻
2215	0	2018070047	郇长花	≥35	41	3	拮抗剂方案	2	225	≤10天	6	≤3000	1350	HCG	2	1	1	继发不孕	0.66	＞24	27.2	混合因素	1	3.25	219	0.38	1	15.28	6.25	55.46	4	5	9.9	B	ICSI	1	0	1	0	1	1	0	否	是	移植	未妊娠
120	1	C00017289	周静	≥35	35	1	降调节方案	3	300	＞10天	11	＞3000	3300	HCG	1	1	0	继发不孕	1.7	≤24	23	女方因素	6	3.9	1620	1.56	8	6.62	6.27	41.94	2	10	8.1	A	IVF	7	1	5	2	2	2	0	否	是	移植	未妊娠
171	0	C00014145	马召民	≥35	44	1	拮抗剂方案	2	286.364	＞10天	11	＞3000	3150	HCG	3	3	2	继发不孕	2.30	≤24	21.1	混合因素	8	2.72	2484	1.23	7	6.62	6.27	41.94	2	16	12.6	A	ICSI	2	0	2	0	2	2	0	否	是	移植	已妊娠	临床妊娠	宫内妊娠	单胎宫内妊娠
445	1	C00005698	杜文慧	＜35	29	2	降调节方案	3	431.25	＞10天	12	＞3000	5175	HCG	6	0	0	原发不孕	1.77	＞24	25.4	女方因素	6	1.04	1835	0.68	7	5.28	6.28	32.81	1	18	12.1	A	IVF	4	0	2	0	2	2	0	否	是	移植	已妊娠	临床妊娠	宫内妊娠	单胎宫内妊娠
734	0	2017120025	田禹娴	＜35	31	1	降调节方案	3	237.5	≤10天	10	≤3000	2375	HCG	5	1	1	继发不孕	3.49	≤24	20.2	不明原因	5	2.35	1478	0.89	6	8.21	6.28	38	1	17	14.8	A-B	IVF	2	0	2	0	2	2	0	否	是	移植	已妊娠	临床妊娠	宫内妊娠	单胎宫内妊娠
1444	0	C00006182	高井红	≥35	44	3	刺激方案	1	225	≤10天	6	≤3000	1350	HCG	10	3	2	继发不孕	0.91	≤24	21.3	女方因素	3	4.1	913	0.68	3	18.93	6.29	59	4	8	9.2	A	IVF	3	0	2	0	2	2	0	否	是	移植	未妊娠
727	1	C00013128	张艳华	≥35	43	1	刺激方案	1	309.375	≤10天	8	≤3000	2475	HCG	1	2	1	继发不孕	1.21	≤24	23.4	女方因素	5	2.35	1538	0.37	5	9.51	6.3	70.1	2	11	1.25		IVF	4	0	3	0	2	2	0	否	是	移植	未妊娠
739	0	2017100087	冯鑫安	＜35	34	1	降调节方案	3	225	＞10天	11	≤3000	2475	HCG	2	0	0	原发不孕	1.42	≤24	19	女方因素	5	2.05	1452	0.67	4	8.53	6.3	45.42	1	12	10.5	A	IVF	1	0	2	1	1	1	0	否	是	移植	未妊娠
1005	1	C00016093	张艳华	≥35	44	2	刺激方案	1	300	＞10天	11	＞3000	3300	HCG	1	2	1	继发不孕	1.54	≤24	23.4	女方因素	4	10.46	1246	0.6	6	9.51	6.3	70.1	2	11	0.63		IVF	6	0	4	1	0	0	0	否	否	全胚冷冻
1174	1	2016060052	李玲玲	＜35	29	1	降调节方案	3	390	≤10天	10	＞3000	3900	HCG	4	0	0	原发不孕	0.28	≤24	23.7	女方因素	4	2.67	1159	0.95	3	9.6	6.3	21.3	3	5	9.4	B	IVF	3	0	2	0	2	2	0	否	是	移植	已妊娠	临床妊娠	宫内妊娠	单胎宫内妊娠
2248	1	2017050004	赵丙兰	≥35	42	2	刺激方案	1	341.667	≤10天	9	＞3000	3075	HCG	1	5	2	继发不孕	0.94	＞24	24.6	女方因素	1	5.11	463.5	0.39	1	12.68	6.3	65.42	4	5	16.8	B	IVF	1	0	1	1	0	0	0	否	否	全胚冷冻
1059	0	2016020022	杨一林	＜35	30	1	降调节方案	3	165	≤10天	10	≤3000	1650	HCG	1	0	0	原发不孕	1.78	≤24	23.3	男方因素	4	2.63	1670	0.52	3	7.53	6.31	84.78	1	36	12.5	A	IVF	3	0	3	1	2	2	0	否	是	移植	未妊娠
1836	1	C00006332	张月莲	≥35	39	2	降调节方案	3	335.526	＞10天	19	＞3000	6375	HCG	9	4	0	继发不孕	1.55	＞24	33.5	女方因素	2	0.55	473	0.42	0	5.3	6.31	32	2	12	13.3	A		0	0	0	0	0	0	0	是		未取到卵
149	0	2016090047	史明燕	＜35	28	1	降调节方案	3	150	＞10天	11	≤3000	1650	HCG	1	2	0	继发不孕	2.28	≤24	19.8	女方因素	8	1.23	2005	0.76	9	11.21	6.32	58.72	1	15	11.4	A	IVF	8	0	4	0	2	2	0	否	是	移植	已妊娠	临床妊娠	宫内妊娠	单胎宫内妊娠
173	0	2017120191	马艳玲	＜35	33	1	降调节方案	3	258.333	＞10天	12	＞3000	3100	HCG	6	2	0	继发不孕	1.65	＞24	24.1	女方因素	8	1.12	2400	1.11	8	7.96	6.33	83.77	1	22	11.7	A-B	IVF	8	0	4	1	2	2	0	否	是	移植	已妊娠	临床妊娠	宫内妊娠	单胎宫内妊娠
796	1	C00019044	辛迪	＜35	33	1	刺激方案	1	450	＞10天	11	＞3000	4950	HCG	2	0	0	原发不孕	2.71	≤24	21	女方因素	5	10.71	1646.47	1.7	5	9.98	6.34	12.43	1	11	12.3	C	IVF	3	0	3	1	0	0	0	否	否	全胚冷冻
1050	0	2017090052	高守燕	≥35	39	1	刺激方案	1	272.727	＞10天	11	≤3000	3000	HCG	8	2	1	继发不孕	1.41	＞24	25	女方因素	4	6.66	1738	0.61	3	9.36	6.34	42	2	7	10.6	B	IVF	2	0	1	1	0	0	0	否	否	全胚冷冻
1382	1	C00017378	张艳	≥35	40	2	拮抗剂方案	2	331.25	＞10天	12	＞3000	3975	HCG	4	1	1	继发不孕	0.7	＞24	27.5	男方因素	3	2.1	526	0.44	2	9.36	6.34	42	4	5	10	A	ICSI	2	0	2	2	2	2	0	否	是	移植	已妊娠	临床妊娠	宫内妊娠	单胚胎停
218	0	2016060172	巩伟伟	＜35	28	1	降调节方案	3	243.75	＞10天	16	＞3000	3900	HCG	3	0	0	原发不孕	1.16	＞24	27.5	女方因素	8	2.34	1655	1.86	5	5.43	6.35	11	3	6	12.5	A	IVF	2	0	2	0	0	0	0	否	否	全胚冷冻
523	0	2018070126	郭盼	＜35	33	1	降调节方案	3	243.75	＞10天	12	≤3000	2925	HCG	5	1	1	继发不孕	3.06	＞24	25.4	不明原因	7	2.34	2763	0.37	7	8.76	6.35	39.09	1	20	10.4	A-B	IVF	6	0	6	2	0	0	0	否	否	全胚冷冻
757	1	C00009058	胥小翠	≥35	35	3	刺激方案	1	375	≤10天	10	＞3000	3750	HCG	4	2	1	继发不孕	2.69	＞24	25	混合因素	5	19.26	1359	1.17	4	8.81	6.35	54	2	10	0.57	A-B	ICSI	2	0	1	0	0	0	0	否	否	全胚冷冻
827	0	2017090180	韩丽萍	≥35	45	7	降调节方案	3	288.462	＞10天	13	＞3000	3750	HCG	7	0	0	原发不孕	0.83	＞24	26	混合因素	5	1.93	1452	0.51	2	6.37	6.35	26	4	7	11.5	A	ICSI	1	0	1	0	0	0	0	否	否	全胚冷冻
843	0	C00004829	胥小翠	＜35	34	1	降调节方案	3	258.824	＞10天	17	＞3000	4400	HCG	4	2	1	继发不孕	1.40	＞24	25	女方因素	5	1.79	1363	0.17	6	8.81	6.35	54	1	11	12	B-C	IVF	1	0	0	0	0	0	0	是		无可移植胚胎
926	0	2018060248	韩丽萍	≥35	46	4	拮抗剂方案	2	281.818	＞10天	11	＞3000	3100	HCG	16	0	0	原发不孕	0.95	＞24	26	混合因素	4	4.85	885	0.63	3	6.37	6.35	26	4	6	8.5	A	ICSI	2	0	2	2	0	0	0	否	否	全胚冷冻
1248	1	2018050037	韩丽萍	≥35	46	8	降调节方案	3	350	＞10天	15	＞3000	5250	HCG	7	0	0	原发不孕	0.11	＞24	26	混合因素	3	1.55	913	0.24	1	6.37	6.35	26	4	5	8.4	A	ICSI	1	0	1	0	1	1	0	否	是	移植	未妊娠
1278	0	C00005110	韩丽萍	≥35	47	6	拮抗剂方案	2	288.462	＞10天	13	＞3000	3750	双扳机	16	0	0	原发不孕	0.904	＞24	26	男方因素	3	3.37	853	0.87	2	6.37	6.35	26	4	4	8.8	A	ICSI	2	0	1	1	0	0	0	否	否	全胚冷冻
1814	0	C00004523	韩丽萍	≥35	47	5	拮抗剂方案	2	272.222	≤10天	9	≤3000	2450	双扳机	16	0	0	原发不孕	0.64	＞24	26	男方因素	2	5.6	522	0.38	3	6.37	6.35	26	4	5	8.4	A	ICSI	3	0	2	1	0	0	0	否	否	全胚冷冻
87	0	C00010683	杜卿	＜35	34	1	降调节方案	3	165	＞10天	15	≤3000	2475	HCG	5	0	0	原发不孕	1.88	≤24	23.7	女方因素	9	0.81	2120	0.95	8	7.2	6.37	34	1	24	7	A	IVF	5	0	2	0	0	0	0	否	否	全胚冷冻
289	1	C00007511	赵平丽	＜35	34	1	降调节方案	3	330	＞10天	15	＞3000	4950	HCG	3	1	0	继发不孕	4.23	＞24	25.4	女方因素	7	6.67	1868	2.63	5	11	6.37	21	1	9	1.01	A	IVF	4	0	2	0	0	0	0	否	否	全胚冷冻
336	1	C00016198	马文文	≥35	35	1	降调节方案	3	300	＞10天	12	＞3000	3600	HCG	1	1	1	继发不孕	1.71	≤24	22.5	女方因素	7	0.37	1983	0.56	8	8.09	6.37	33	2	14	13.8	A	IVF	7	0	4	0	2	2	0	否	是	移植	已妊娠	临床妊娠	宫内妊娠	双胎宫内妊娠
402	0	C00017984	张娜	≥35	35	1	拮抗剂方案	2	150	≤10天	10	≤3000	1500	HCG	6	0	0	原发不孕	2.853	＞24	24.2	女方因素	7	3.34	1298.33	0.7	4	3.21	6.38	68	2	16	10.8	B	IVF	2	0	2	0	2	2	0	否	是	移植	未妊娠
829	0	C00005682	项庆玲	＜35	28	2	降调节方案	3	221.875	＞10天	12	≤3000	2662.5	HCG	3	0	0	原发不孕	1.96	≤24	19.9	女方因素	5	0.96	1439	0.2	9	5.72	6.38	64	1	11	13.5	A	IVF	7	0	2	0	2	2	0	否	是	移植	未妊娠
1175	1	2016060251	亓宗娥	≥35	44	1	刺激方案	1	300	≤10天	10	≤3000	3000	HCG	6	4	1	继发不孕	1.00	＞24	25.5	女方因素	4	11.01	1149	1.08	2	9.04	6.38	67	4	7	11	B	IVF	1	0	0	0	0	0	0	是		无可移植胚胎
1336	0	2016090007	亓宗娥	≥35	44	2	刺激方案	1	278.571	≤10天	7	≤3000	1950	HCG	6	4	1	继发不孕	0.74	＞24	25.5	女方因素	3	5.6	639	0.81	2	9.04	6.38	67	4	7	14.4	B	IVF	1	0	0	0	0	0	0	是		无可移植胚胎
1667	0	C00004982	罗俊玲	≥35	43	1	刺激方案	1	225	≤10天	10	≤3000	2250	HCG	3	1	1	继发不孕	0.30	≤24	22.9	女方因素	2	15.75	832	0.9	1	14.47	6.39	80	4	3	5.4	A	IVF	0	0	0	0	0	0	0	是		无可移植胚胎
1756	1	C00016423	张振林	≥35	37	1	降调节方案	3	316.071	＞10天	14	＞3000	4425	HCG	7	5	2	继发不孕	0.54	≤24	22.6	女方因素	2	2.73	621	0.5	1	16.17	6.39	59	4	6	13.5	A	IVF	1	0	0	0	0	0	0	是		无可移植胚胎
1983	1	C00017705	张振林	≥35	37	2	拮抗剂方案	2	300	≤10天	10	≤3000	3000	HCG	7	5	2	继发不孕	2.13	≤24	22.6	女方因素	2	1.57	412	0.78	3	16.17	6.39	59	2	6	13	A-B	IVF	2	0	1	0	1	1	0	否	是	移植	已妊娠	临床妊娠	宫内妊娠	单胎宫内妊娠
2231	1	C00008634	王凤麟	≥35	46	1	拮抗剂方案	2	581.25	≤10天	8	＞3000	4650	HCG	0	1	0	继发不孕	0.09	＞24	25.4	混合因素	1	4.88	156	0.04	1	5.23	6.39	54.65	4	3	0.99	B	ICSI	1	0	1	0	1	1	0	否	是	移植	未妊娠
57	0	C00016891	王慧杰	＜35	27	1	降调节方案	3	225	＞10天	11	≤3000	2475	HCG	3	0	0	原发不孕	1.87	≤24	18.4	女方因素	9	1.95	2811	1.14	9	5.47	6.4	17	1	17	11.5	A	IVF	2	0	1	0	1	1	0	否	是	移植	未妊娠
106	1	C00010150	李伦伦	＜35	32	1	降调节方案	3	317.647	＞10天	17	＞3000	5400	HCG	4	1	1	继发不孕	1.77	＞24	28.9	女方因素	9	2.22	1870	2.97	7	7.88	6.4	33	1	18	11.3	A-B	IVF	3	0	2	0	0	0	0	否	否	全胚冷冻
1440	1	2016030163	刘冬梅	≥35	40	2	降调节方案	3	472.222	≤10天	9	＞3000	4250	HCG	1	2	1	继发不孕	0.74	≤24	22	男方因素	3	8.97	926	0.8	4	10.85	6.4	49.86	4	6	10.7	A	ICSI	3	0	2	1	0	0	0	否	否	全胚冷冻
47	1	2018010230	田媛	≥35	38	2	降调节方案	3	360.417	＞10天	12	＞3000	4325	HCG	9	0	0	原发不孕	2.47	＞24	24.4	女方因素	9	2.01	2044	1.06	7	7.4	6.41	55.05	2	9	14.5	B	IVF	5	0	2	0	0	0	0	否	否	全胚冷冻
1972	0	2017020047	王清淑	≥35	46	3	刺激方案	1	150	≤10天	8	≤3000	1200	HCG	5	4	1	继发不孕	0.415	≤24	19.9	女方因素	2	14.09	451	0.66	2	16.72	6.41	62.39	4	3	4.5	A	IVF	2	0	1	0	0	0	0	否	否	全胚冷冻
690	0	2017110119	吴玉贞	≥35	36	2	降调节方案	3	187.5	＞10天	12	≤3000	2250	HCG	2	2	1	继发不孕	4.24	≤24	23.4	男方因素	5	7.38	1767	1.47	8	9.91	6.42	41	2	16	10.2	A	ICSI	5	0	2	1	2	2	0	否	是	移植	未妊娠
1375	0	2017030130	张静	≥35	38	1	刺激方案	1	150	≤10天	5	≤3000	750	HCG	9	0	0	原发不孕	1.05	＞24	29.4	混合因素	3	10.7	448	1.88	3	8.14	6.42	48.65	4	7	8.7	B	ICSI	3	0	2	0	0	0	0	否	否	全胚冷冻
1417	0	C00011714	游双慧	≥35	39	2	刺激方案	1	180	≤10天	10	≤3000	1800	双扳机	5	3	1	继发不孕	0.34	≤24	19.7	女方因素	3	18.45	848	1.4	2	14.7	6.43	49.09	4	3	7.2	B-C	IVF	1	0	1	1	0	0	0	否	否	全胚冷冻
1565	0	C00012613	游双慧	≥35	39	3	刺激方案	1	218.182	＞10天	11	≤3000	2400	HCG	6	3	1	继发不孕	0.28	≤24	19.7	女方因素	3	22.3	1098	1.07	2	14.7	6.43	39.09	4	3	6.4	B-C	IVF	1	0	1	0	0	0	0	否	否	全胚冷冻
1706	1	C00015730	杜艳君	≥35	35	1	拮抗剂方案	2	322.222	≤10天	9	≤3000	2900	HCG	2	2	1	继发不孕	0.41	≤24	19.5	女方因素	2	13.99	740	1.06	2	13.39	6.43	56	4	5	0.59	A-B	IVF	0	0	0	0	0	0	0	是		无可移植胚胎
2037	0	C00010570	游双慧	≥35	39	1	刺激方案	1	225	≤10天	8	≤3000	1800	HCG	5	3	1	继发不孕	0.26	≤24	22	混合因素	1	12.51	681	1.03	0	14.7	6.43	59.09	4	3	5.9	A		0	0	0	0	0	0	0	是		未取到卵
13	1	2017030223	杨瑞平	≥35	39	1	刺激方案	1	351.923	＞10天	13	＞3000	4575	HCG	2	1	1	继发不孕	2.21	＞24	28.6	男方因素	10	3.75	2800	0.95	6	9.82	6.45	40	2	11	11.8	A	ICSI	1	0	0	0	0	0	0	是		无可移植胚胎
99	1	2017050106	刘爱君	≥35	43	1	降调节方案	3	375	＞10天	12	＞3000	4500	HCG	4	2	1	继发不孕	2.13	＞24	24.8	男方因素	9	4.64	1936	1.9	8	8.56	6.45	45.48	2	17	10	A	ICSI	6	0	2	0	0	0	0	否	否	全胚冷冻
778	0	2016110220	孔海春	＜35	33	1	拮抗剂方案	2	225	≤10天	10	≤3000	2250	HCG	6	2	0	继发不孕	1.82	＞24	24.7	女方因素	5	2.64	1767	0.45	8	8.33	6.45	43.5	1	15	7.8	A	IVF	3	0	0	0	0	0	0	是		无可移植胚胎
814	0	C00008514	公晓琳	＜35	32	3	降调节方案	3	225	≤10天	10	≤3000	2250	HCG	1	1	0	继发不孕	3.08	≤24	24	女方因素	5	0.89	1545	1.04	6	7.79	6.45	82.82	1	20	13	A-B	IVF	6	0	3	0	2	2	0	否	是	移植	未妊娠
1149	1	2016040188	温莹	≥35	43	1	降调节方案	3	350	＞10天	12	＞3000	4200	HCG	4	2	0	继发不孕	1.73	≤24	21.2	女方因素	4	1.35	1274	1.57	4	5.96	6.45	37	2	11	12.6	A	IVF	2	0	2	1	0	0	0	否	否	全胚冷冻
1220	0	2018060170	田超清	≥35	38	4	刺激方案	1	267.857	＞10天	14	＞3000	3750	HCG	11	0	0	原发不孕	1.94	≤24	19	男方因素	4	9.17	1129	0.81	4	8.1	6.45	42	2	10	6.8	A-B	IVF	2	0	2	0	0	0	0	否	否	全胚冷冻
1472	1	C00013213	罗丽	≥35	37	2	刺激方案	1	318.75	≤10天	8	≤3000	2550	HCG	1	1	0	继发不孕	2.88	≤24	23.3	女方因素	3	1.21	892	1.26	2	8.1	6.45	42	2	10	1.2	A	IVF	2	0	2	0	2	2	0	否	是	移植	未妊娠
1631	1	2016080070	崔晶	＜35	34	1	刺激方案	1	375	≤10天	6	≤3000	2250	HCG	4	0	0	原发不孕	0.54	＞24	28	女方因素	2	0.89	910	1.01	0	14.52	6.45	57	3	3	9.8	A-B		0	0	0	0	0	0	0	是		未取到卵
2028	0	2018060084	杨咏梅	≥35	43	1	刺激方案	1	150	≤10天	6	≤3000	900	HCG	1	4	1	继发不孕	0.07	≤24	19.8	混合因素	1	13.81	719	0.47	1	18.97	6.45	84	4	3	5.5		ICSI	0	0	0	0	0	0	0	是		无可移植胚胎
121	0	2017070228	任万凤	＜35	27	1	降调节方案	3	187.5	≤10天	10	≤3000	1875	HCG	2	0	0	原发不孕	2.53	＞24	27.3	女方因素	9	0.61	1094	1.59	9	4.8	6.46	93.36	1	20	9.4	B	IVF	6	0	0	0	0	0	0	是		无可移植胚胎
227	1	C00009464	刘绍美	≥35	40	1	降调节方案	3	300	≤10天	9	≤3000	2700	HCG	1	1	1	继发不孕	2.4	≤24	23.8	女方因素	8	1.46	1450	2.82	7	4.98	6.46	34.5	2	20	11.5	A	IVF	1	0	0	0	0	0	0	是		无可移植胚胎
301	0	2017120276	任万凤	＜35	27	2	拮抗剂方案	2	275	≤10天	5	≤3000	1375	双扳机	2	0	0	原发不孕	1.23	＞24	27.3	不明原因	7	1.22	2629	1.04	5	4.8	6.46	93.36	1	20	13	A	IVF	5	0	0	0	0	0	0	是		无可移植胚胎
324	1	C00004544	吴平	＜35	27	2	拮抗剂方案	2	395.455	＞10天	11	＞3000	4350	HCG	3	1	0	继发不孕	3.48	＞24	29.3	女方因素	7	2.39	2129	1.06	9	8.91	6.46	23	1	16	12.1	A	IVF	4	0	1	0	1	1	0	否	是	移植	未妊娠
1107	1	C00018307	鲍海艳	≥35	39	1	拮抗剂方案	2	300	≤10天	10	≤3000	3000	HCG	2	0	0	原发不孕	2.47	≤24	18	混合因素	4	1.78	1412.16	1.78	8	7.16	6.46	81.78	2	12	10.8	A	ICSI	6	0	4	2	0	0	0	否	否	全胚冷冻
1502	1	C00010298	张欣彦	≥35	37	2	刺激方案	1	450	≤10天	9	＞3000	4050	HCG	2	2	1	继发不孕	1.7	≤24	22.1	女方因素	3	15.06	954	1.46	3	11.82	6.46	82	2	8	0.24		IVF	2	0	2	0	0	0	0	否	否	全胚冷冻
1550	1	C00012315	刘绍美	≥35	41	2	拮抗剂方案	2	312.5	≤10天	8	≤3000	2500	HCG	1	1	1	继发不孕	1.36	≤24	23.8	混合因素	3	2.53	1153	1.45	4	4.98	6.46	34.5	2	20	0.99	A	ICSI	2	0	2	0	2	2	0	否	是	移植	已妊娠	临床妊娠	宫内妊娠	单胚胎停
1733	1	2016040088	赵洪燕	＜35	33	1	降调节方案	3	375	≤10天	8	≤3000	3000	HCG	4	1	1	继发不孕	0.272	＞24	24.8	混合因素	2	9.11	672	1.12	0	7.47	6.46	84.41	3	3	9.2	A		0	0	0	0	0	0	0	是		未取到卵
1839	1	2018030224	王文霞	≥35	40	1	刺激方案	1	403.125	＞10天	16	＞3000	6450	HCG	5	0	0	原发不孕	0.031	＞24	27.7	混合因素	2	7.77	468	0.13	1	8.99	6.46	84.41	4	3	6.8	B-C	ICSI	1	0	0	0	0	0	0	是		无可移植胚胎
322	1	2016080141	吕娜	＜35	34	1	降调节方案	3	450	≤10天	8	＞3000	3600	HCG	2	0	0	原发不孕	1.21	≤24	20.3	女方因素	9	1.65	1702	1.14	7	7.98	6.47	56.76	1	9	15.9	B	IVF	7	0	6	2	2	2	0	否	是	移植	已妊娠	临床妊娠	宫内妊娠	单胎宫内妊娠
958	1	C00003396	邵明娥	≥35	39	2	刺激方案	1	450	≤10天	6	≤3000	2700	HCG	6	2	1	继发不孕	1.9	＞24	26	混合因素	4	10.88	511	1.37	4	20.62	6.47	52	2	8	10	A-B	ICSI	1	0	1	0	1	1	0	否	是	移植	未妊娠
2041	1	2018050133	邵明娥	≥35	38	1	拮抗剂方案	2	375	＞10天	19	＞3000	7125	HCG	6	2	1	继发不孕	1.49	＞24	26	女方因素	1	4.25	664	0.32	2	20.62	6.47	52	2	8	10.7	A	IVF	3	0	1	1	0	0	0	否	否	全胚冷冻
917	1	C00014721	杨冠敏	＜35	34	2	降调节方案	3	362.5	＞10天	12	＞3000	4350	HCG	1	2	1	继发不孕	1.58	≤24	21.8	女方因素	4	1.71	954	0.7	3	5.78	6.48	30	1	8	14.4	A	IVF	2	0	2	2	2	2	0	否	是	移植	未妊娠
2239	0	2016010090	赵桂荣	≥35	45	2	刺激方案	1	187.5	≤10天	10	≤3000	1875	HCG	6	3	1	继发不孕	0.9	＞24	25.3	混合因素	1	5.34	116	0.76	0	16.63	6.48	74.77	4	3	4.8	B		0	0	0	0	0	0	0	是		未取到卵
137	1	C00003693	赵艳红	＜35	34	1	降调节方案	3	400	≤10天	9	＞3000	3600	HCG	7	1	0	继发不孕	1.53	＞24	47.3	女方因素	8	1.36	1438	1.29	8	5.39	6.49	24.29	1	11	8.5		IVF	5	0	4	0	0	0	0	否	否	全胚冷冻
221	0	C00005318	翟钰	＜35	32	1	降调节方案	3	265.385	＞10天	13	＞3000	3450	HCG	1	2	0	继发不孕	1.96	≤24	20.3	女方因素	8	1.15	1613	0.42	9	8.69	6.49	42	1	14	17.9	B	IVF	2	1	2	0	0	0	0	否	否	全胚冷冻
1090	0	2017110184	边玉梅	＜35	28	2	降调节方案	3	259.091	＞10天	11	≤3000	2850	HCG	3	1	1	继发不孕	2.04	≤24	20.4	男方因素	4	1.94	1477	0.62	5	8.69	6.49	42	1	15	18.8	A	ICSI	2	0	2	0	2	2	0	否	是	移植	未妊娠
1632	0	C00018456	毛毳	≥35	40	1	拮抗剂方案	2	225	≤10天	6	≤3000	1350	HCG	2	1	0	继发不孕	1.33	≤24	17.4	女方因素	2	13.24	906.19	1.8	2	7.98	6.49	47	2	8	10.5	A-B	IVF	0	0	0	0	0	0	0	是		无可移植胚胎
147	1	C00007352	李玲玲	＜35	32	2	刺激方案	1	450	＞10天	13	＞3000	5850	HCG	2	0	0	继发不孕	1.70	≤24	23.7	女方因素	8	1.5	2087	1.44	5	7.34	6.5	30.87	1	10	11.5	B	IVF	4	0	2	0	2	2	0	否	是	移植	未妊娠
342	0	2017050181	梁丽	＜35	26	1	降调节方案	3	256.818	＞10天	11	≤3000	2825	HCG	6	0	0	原发不孕	1.87	≤24	23.9	混合因素	7	6.57	1876	1.09	8	6.16	6.5	25	1	18	12.3	A	ICSI	3	0	2	0	0	0	0	否	否	全胚冷冻
579	0	C00017206	辛园园	＜35	34	1	拮抗剂方案	2	250	＞10天	13	＞3000	3250	HCG	1	0	0	原发不孕	2.1	≤24	17.5	女方因素	6	2.62	1648	0.61	6	13.4	6.5	26	1	9	13.4	A-B	IVF	2	0	1	0	1	1	0	否	是	移植	未妊娠
1584	1	C00010956	李玲玲	＜35	32	3	刺激方案	1	450	≤10天	10	＞3000	4500	HCG	2	0	0	继发不孕	1.1	≤24	23.7	女方因素	3	2.82	1040	0.51	2	7.34	6.5	30.87	3	6	1.07	B	IVF	2	0	0	0	0	0	0	是		无可移植胚胎
1615	0	2016040125	孟凡芝	≥35	44	1	刺激方案	1	225	≤10天	7	≤3000	1575	HCG	4	2	1	继发不孕	0.33	＞24	24.9	混合因素	2	1.03	962	1	1	8.64	6.5	39	4	4		A	ICSI	1	0	1	1	0	0	0	否	否	全胚冷冻
1635	1	2017050105	王桂英	≥35	44	4	拮抗剂方案	2	350	≤10天	9	＞3000	3150	HCG	8	2	0	继发不孕	0.73	＞24	25.7	男方因素	2	29.29	897	2.37	1	12.28	6.5	96.43	4	3	6.7	B	ICSI	0	0	0	0	0	0	0	是		无可移植胚胎
1734	0	C00018370	辛园园	＜35	34	2	拮抗剂方案	2	225	＞10天	11	≤3000	2475	HCG	1	0	0	原发不孕	2.03	≤24	17.5	男方因素	2	6.06	668.53	0.68	2	13.4	6.5	26	1	9	11.1	A	ICSI	1	0	1	0	1	1	0	否	是	移植	未妊娠
2008	1	2017030066	王桂英	≥35	44	3	降调节方案	3	425	＞10天	11	＞3000	4675	HCG	8	2	0	继发不孕	0.23	＞24	25.7	女方因素	1	10.13	928	1.02	0	12.28	6.5	46.43	4	3	7.5	A		0	0	0	0	0	0	0	是		未取到卵
2131	0	C00018070	冷芍遐	＜35	34	3	拮抗剂方案	2	178.125	≤10天	8	≤3000	1425	双扳机	1	2	0	继发不孕	2.38	≤24	19.3	女方因素	4	3.27	813.1	0.36	4	8.64	6.5	46	1	20	11.4	B	IVF	4	0	2	0	0	0	0	否	否	全胚冷冻
2144	0	2017060035	王桂英	≥35	44	5	降调节方案	3	195	≤10天	5	≤3000	975	HCG	8	3	1	继发不孕	0.01	＞24	25.7	男方因素	1	17.92	382	1.76	1	12.28	6.5	86.43	4	3	7.9	A-B	ICSI	1	0	1	0	2	2	0	否	是	移植	未妊娠
2256	1	2017100221	孟凡芝	≥35	45	4	刺激方案	1	375	≤10天	7	≤3000	2625	HCG	4	2	1	继发不孕	0.42	＞24	24.9	混合因素	1	9.35	340	0.5		8.64	6.5	47.4	4	4			ICSI	1	0	1	0	0	0	0	否	否	全胚冷冻
187	0	2017110229	赵冉	≥35	35	1	降调节方案	3	206.25	＞10天	12	≤3000	2475	HCG	9	0	0	原发不孕	3.40	≤24	20.1	男方因素	8	1.69	2203	1.02	6	9.2	6.53	20	2	16	13	A	ICSI	2	0	0	0	0	0	0	是		无可移植胚胎
194	0	2018030031	韩秀君	≥35	39	1	降调节方案	3	259.091	＞10天	11	≤3000	2850	HCG	6	5	1	继发不孕	1.30	＞24	27.3	女方因素	8	6.03	2026	0.89	9	10.11	6.53	83.77	2	12	8.8	A	IVF	6	0	3	1	2	2	0	否	是	移植	已妊娠	临床妊娠	宫内妊娠	单胎宫内妊娠
618	1	C00006721	郝福秀	＜35	32	2	降调节方案	3	300	≤10天	9	≤3000	2700	HCG	3	3	0	继发不孕	3.68	≤24	20.4	女方因素	6	2.2	1311	0.56	4	5.2	6.54	21	1	16	12.6	A-B	IVF	3	0	2	0	2	2	0	否	是	移植	未妊娠
1056	1	2018040162	梁宁宁	＜35	33	1	降调节方案	3	394.118	＞10天	17	＞3000	6700	HCG	1	0	0	原发不孕	2.26	＞24	26	女方因素	4	1.03	1689	0.8	6	7.84	6.54	36.6	1	20	20.8	A	IVF	1	0	1	0	0	0	0	否	否	全胚冷冻
1710	0	C00018148	黄英	≥35	42	2	刺激方案	1	150	≤10天	8	≤3000	1200	HCG	5	1	1	继发不孕	0.16	＞24	25	混合因素	2	21.54	733.28	0.7	0	17.8	6.55	38	4	2	8.9	B		0	0	0	0	0	0	0	是		未取到卵
2194	0	2018010125	沈江玲	≥35	46	1	拮抗剂方案	2	171.429	＞10天	14	≤3000	2400	双扳机	3	2	1	继发不孕	0.36	≤24	19.5	女方因素	1	25.58	273	1.05		19.61	6.55	78.46	4	2	9.6	A		0	0	0	0	0	0	0	是		未取卵
656	1	2018040082	许福霞	≥35	41	2	刺激方案	1	415.909	＞10天	11	＞3000	4575	HCG	3	1	0	继发不孕	1.12	≤24	23.1	女方因素	5	1.88	676	2.02	2	14.83	6.56	46.23	4	6	8.5	A-B	IVF	1	0	1	0	0	0	0	否	否	全胚冷冻
1552	1	2017110026	许福霞	≥35	41	1	降调节方案	3	371.429	≤10天	7	≤3000	2600	HCG	3	1	0	继发不孕	0.33	≤24	23.1	混合因素	3	10.09	1148	0.89	2	14.83	6.56	46.23	4	6	9.8	A	ICSI	1	0	0	0	0	0	0	是		无可移植胚胎
85	1	C00016348	NGWA MALAY	＜35	28	1	降调节方案	3	300	≤10天	10	≤3000	3000	HCG	2	1	0	继发不孕	2.18	≤24	18.8	男方因素	9	1.14	2122	0.78	7	8.74	6.57	48	1	12	10.1	A	ICSI	5	0	4	1	2	2	0	否	是	移植	未妊娠
385	0	C00013285	王丽	≥35	46	4	降调节方案	3	242.308	＞10天	13	＞3000	3150	HCG	1	1	1	继发不孕	1.25	≤24	24	女方因素	7	1.11	1566	0.33	5	10.71	6.58	37.78	2	13	10.5	B	IVF	4	0	0	0	0	0	0	是		无可移植胚胎
562	1	C00011626	王丽	≥35	46	3	降调节方案	3	343.75	＞10天	12	＞3000	4125	HCG	1	1	1	继发不孕	1.25	≤24	24	女方因素	6	2.66	1824	1.32	5	10.71	6.58	37.78	2	13	1.12	A-B	IVF	5	0	4	0	2	2	0	否	是	移植	已妊娠	临床妊娠	宫内妊娠	单胚胎停
2091	1	2016110180	崔荣贵	≥35	39	3	降调节方案	3	291.667	≤10天	9	≤3000	2625	HCG	3	2	1	继发不孕	0.30	＞24	26.5	混合因素	1	10.77	493	1.87	1	10.61	6.59	44.4	4	3	10.1	A	ICSI	1	0	1	0	1	1	0	否	是	移植	未妊娠
94	0	2017060163	张贵霞	＜35	32	2	降调节方案	3	156.25	＞10天	12	≤3000	1875	HCG	2	1	1	继发不孕	1.49	≤24	21.8	女方因素	9	1.4	1955	0.84	7	5.44	6.6	55.05	1	15	14.9	A	IVF	5	0	2	0	2	2	0	否	是	移植	已妊娠	临床妊娠	宫内妊娠	双胎宫内妊娠
733	0	2017060023	刘风华	≥35	39	1	刺激方案	1	225	≤10天	7	≤3000	1575	HCG	1	3	1	继发不孕	3.37	＞24	26.7	女方因素	5	15.37	1493.4	1.23	7	14.9	6.6	25	2	10	5.8	A	IVF	5	0	2	0	0	0	0	否	否	全胚冷冻
1660	0	2016100121	夏丽丽	≥35	43	5	拮抗剂方案	2	215.625	≤10天	8	≤3000	1725	HCG	3	9	2	继发不孕	0.76	≤24	23.7	女方因素	2	8.37	842	1.13	2	6.52	6.6	92.17	4	4	10.3	B-C	IVF	2	0	2	1	0	0	0	否	否	全胚冷冻
1718	1	2016080164	夏丽丽	≥35	42	4	刺激方案	1	300	≤10天	10	≤3000	3000	HCG	3	9	2	继发不孕	0.76	≤24	23.7	女方因素	2	6.17	714	0.36	2	6.52	6.6	92.17	4	4	9.8	B	IVF	1	0	2	1	0	0	0	否	否	全胚冷冻
1785	0	2016060153	夏丽丽	≥35	42	3	刺激方案	1	262.5	≤10天	8	≤3000	2100	HCG	3	9	1	继发不孕	0.76	≤24	23.7	女方因素	2	2.66	574	0.32	2	6.52	6.6	92.17	4	4	8.7	B	IVF	2	0	2	1	2	2	0	否	是	移植	未妊娠
2197	0	C00011211	张迎秋	≥35	43	1	刺激方案	1	150	≤10天	5	≤3000	750	HCG	5	2	1	继发不孕	0.2	≤24	18.8	女方因素	1	6.89	269	1.12	1	18.56	6.6	20	4	3	7.3	A	IVF	1	0	1	0	1	1	0	否	是	移植	未妊娠
567	1	C00012087	张雪	＜35	31	1	拮抗剂方案	2	300	≤10天	9	≤3000	2700	HCG	4	0	0	原发不孕	5.43	≤24	18.4	女方因素	6	4.55	1791	0.92	8	11.34	6.61	33	1	20	1.17	A	IVF	3	1	4	0	2	2	0	否	是	移植	未妊娠
1908	0	2017100139	贾秀萍	≥35	36	2	刺激方案	1	150	＞10天	11	≤3000	1650	双扳机	2	2	1	继发不孕	0.66	≤24	21.3	女方因素	2	10.89	506	0.71	2	13.16	6.61	87.7	4	5	6.8	B	IVF	2	0	1	1	0	0	0	否	否	全胚冷冻
2160	0	C00007404	刘金华	≥35	41	3	刺激方案	1	233.333	≤10天	9	≤3000	2100	HCG	4	4	1	继发不孕	0.15	≤24	22.6	女方因素	1	9.35	340	0.5	1	12.42	6.61	51.7	4	4	5.2	B	IVF	0	0	0	0	0	0	0	是		未受精
2255	0	2017120199	贾秀萍	≥35	36	3	刺激方案	1	150	≤10天	7	≤3000	1050	HCG	2	2	1	继发不孕	0.2	≤24	21.3	女方因素	1	7.69	342	1.17	1	13.16	6.61	87.7	4	3			IVF	1	0	1	0	0	0	0	否	否	全胚冷冻
735	0	C00015747	于瑶	＜35	34	3	降调节方案	3	205	＞10天	15	＞3000	3075	HCG	4	2	1	继发不孕	2.66	≤24	17.9	男方因素	5	2.44	1470	0.51	7	7.85	6.62	46.98	1	11	8.5	A	ICSI	4	0	4	1	0	0	0	否	否	全胚冷冻
1185	1	C00016156	付学辉	≥35	43	1	降调节方案	3	340.909	＞10天	11	＞3000	3750	HCG	2	3	0	继发不孕	0.29	≤24	19.4	女方因素	4	2.18	1121	0.65	4	14.08	6.62	46.7	4	8	8.7	A	IVF	3	0	2	0	2	2	0	否	是	移植	未妊娠
1218	0	C00017642	付学辉	≥35	43	2	拮抗剂方案	2	287.5	＞10天	12	＞3000	3450	HCG	2	3	0	继发不孕	1.28	≤24	19.4	女方因素	4	1.32	1130	1.12	4	14.08	6.62	46.7	2	8	7.3	A	IVF	3	0	2	1	2	2	0	否	是	移植	已妊娠	临床妊娠	宫内妊娠	单胎宫内妊娠
341	0	C00010517	王谦	＜35	29	1	降调节方案	3	195	≤10天	10	≤3000	1950	HCG	1	0	0	原发不孕	2.78	＞24	24.1	女方因素	9	1.82	1916	1.01	8	5.84	6.64	32	1	23	1.03	A-B	IVF	6	0	6	3	2	2	0	否	是	移植	已妊娠	临床妊娠	宫外妊娠	异位妊娠
1831	0	C00011541	何梦珠	＜35	30	1	刺激方案	1	274.107	＞10天	14	＞3000	3837.5	双扳机	4	0	0	原发不孕	0.829	≤24	23.8	混合因素	2	28.19	490	0.49	1	16.36	6.64	17	3	5	6.2	B	ICSI	1	0	1	1	0	0	0	否	否	全胚冷冻
101	1	2016040270	王圣香	＜35	29	1	降调节方案	3	306.818	＞10天	11	＞3000	3375	HCG	1	0	0	原发不孕	1.23	＞24	24.6	混合因素	7	0.35	1814	1.08	9	6.51	6.65	50.5	1	17	1.4	A	ICSI	6	0	5	3	0	0	0	否	否	全胚冷冻
17	0	2017010071	张光梓	＜35	32	1	降调节方案	3	150	≤10天	9	≤3000	1350	HCG	3	1	0	继发不孕	1.79	≤24	20.9	女方因素	9	0.85	1168	0.63	7	9.33	6.66	35.42	1	14	11	A	IVF	5	0	5	2	2	2	0	否	是	移植	已妊娠	临床妊娠	宫内妊娠	单胎宫内妊娠
158	1	2017090269	姚立春	≥35	37	1	刺激方案	1	300	≤10天	8	≤3000	2400	HCG	6	0	0	原发不孕	2.34	＞24	26.1	女方因素	8	1.25	1823	0.7	6	6.39	6.66	24	2	12	11.2	A	IVF	5	0	2	0	2	2	0	否	是	移植	未妊娠
783	1	2016070062	刘春燕	≥35	40	2	降调节方案	3	390	≤10天	10	＞3000	3900	HCG	1	1	1	继发不孕	1.22	≤24	22.9	女方因素	5	0.68	1734	0.72	6	8.45	6.66	45.95	2	14	15	A	IVF	2	0	1	0	1	1	0	否	是	移植	未妊娠
993	1	C00011796	王爱敏	≥35	42	2	拮抗剂方案	2	300	＞10天	11	＞3000	3300	HCG	2	3	1	继发不孕	1.09	＞24	27.3	女方因素	4	4.39	1307.54	1.12	1	5.79	6.66	46	4	7	0.87	A-B	IVF	0	0	0	0	0	0	0	是		无可移植胚胎
1486	1	C00011756	陈义花	＜35	28	1	刺激方案	1	300	≤10天	10	≤3000	3000	HCG	3	0	0	原发不孕	1.26	≤24	21.3	女方因素	3	31.49	831	1.81	2	6.58	6.67	46.98	1	6	0.44	A	IVF	0	0	0	0	0	0	0	是		无可移植胚胎
1868	1	2016090046	秦学芳	≥35	41	1	刺激方案	1	300	≤10天	5	≤3000	1500	HCG	1	1	1	继发不孕	1.09	≤24	22.2	女方因素	2	2.63	360	1.09	1	12.84	6.67	18	4	4	14	A	IVF	1	0	1	0	0	0	0	否	否	全胚冷冻
108	0	C00005344	张孝荣	＜35	31	1	拮抗剂方案	2	225	≤10天	7	≤3000	1575	HCG	4	0	0	原发不孕	2.0	≤24	19.5	女方因素	7	1.6	1515	0.86	6	6.67	6.68	43	1	11	11.7	B	IVF	5	0	5	1	2	2	0	否	是	移植	未妊娠
320	0	C00018399	谢琳	≥35	37	2	降调节方案	3	256.25	＞10天	12	＞3000	3075	HCG	1	1	0	继发不孕	1.51	≤24	17.9	男方因素	7	0.58	2174.76	0.83	5	8.77	6.68	65	2	11			ICSI	4	0	2	1	0	0	0	否	否	全胚冷冻
458	1	C00016473	谢琳	≥35	37	1	降调节方案	3	375	＞10天	13	＞3000	4875	HCG	4	0	0	原发不孕	2.75	≤24	17.9	男方因素	6	1	1722	1.33	6	8.77	6.68	65	2	11	14.4	B-C	ICSI	3	0	3	1	2	2	0	否	是	移植	已妊娠	临床妊娠	宫内妊娠	单胚胎停
626	1	2016030158	井绪花	＜35	29	1	降调节方案	3	323.077	＞10天	13	＞3000	4200	HCG	2	1	0	继发不孕	1.4	＞24	35.8	女方因素	6	0.81	1161	0.56	5	9.24	6.68	45	1	28	15	B	IVF	3	0	3	2	2	2	0	否	是	移植	未妊娠
1626	0	2016110081	崔兰玲	≥35	45	2	刺激方案	1	225	≤10天	9	≤3000	2025	HCG	1	2	1	继发不孕	0.21	＞24	24.2	混合因素	2	5.36	932	0.53	6	20.67	6.68	43	4	6	11.4	B-C	ICSI	4	0	2	1	0	0	0	否	否	全胚冷冻
2064	1	2016070097	崔兰玲	≥35	45	1	刺激方案	1	300	≤10天	8	≤3000	2400	HCG	1	2	1	继发不孕	1.0	＞24	24.2	混合因素	1	5.51	588	1.03	1	20.67	6.68	43	4	5		B	ICSI	1	0	0	0	0	0	0	是		无可移植胚胎
2238	0	2017120272	王同艳	≥35	44	1	刺激方案	1	135	≤10天	5	≤3000	675	HCG	1	2	1	继发不孕	0.19	≤24	22.3	男方因素	1	17.38	121	0.43	1	16.24	6.68	65	4	5	9.5	A	IVF	0	0	0	0	0	0	0	是		无可移植胚胎
804	1	C00008111	刘静	≥35	43	1	降调节方案	3	350	＞10天	12	＞3000	4200	HCG	2	4	1	继发不孕	2.88	＞24	24.2	女方因素	5	0.99	1603	0.28	5	9.9	6.69	28.73	2	9	1	A-B	IVF	3	0	3	1	0	0	0	否	否	全胚冷冻
865	1	C00013416	刘静	≥35	44	2	刺激方案	1	300	≤10天	9	≤3000	2700	HCG	2	4	1	继发不孕	0.7	＞24	24.2	女方因素	5	0.75	1209	1.23	5	9.9	6.69	28.73	4	9	0.94	A	IVF	4	0	4	1	0	0	0	否	否	全胚冷冻
88	0	C00010153	鞠元燕	＜35	31	1	拮抗剂方案	2	200	≤10天	9	≤3000	1800	HCG	5	0	0	原发不孕	1.33	＞24	28.9	女方因素	9	2.3	2095	1.09	9	6.54	6.7	78.65	1	15	1.43	A-B	IVF	5	0	2	0	2	2	0	否	是	移植	已妊娠	临床妊娠	宫内妊娠	单胚胎停
934	1	C00018499	汪晓宁	＜35	33	2	刺激方案	1	450	≤10天	10	＞3000	4500	HCG	3	1	1	继发不孕	1.05	≤24	20.6	女方因素	4	2.14	844.63	0.23	2	7.1	6.7	83	3	6	11.8	A-B	IVF	2	0	1	1	1	1	0	否	是	移植	未妊娠
1366	1	C00003637	陆田田	≥35	37	5	降调节方案	3	325	＞10天	13	＞3000	4225	HCG	3	1	0	继发不孕	1.29	＞24	28.6	混合因素	3	0.92	516	0.39	2	8.76	6.7	38	2	6	14.8	B	ICSI	3	0	2	1	2	2	0	否	是	移植	已妊娠	临床妊娠	宫内妊娠	单胎宫内妊娠
353	1	2016060256	王传冬	≥35	42	2	刺激方案	1	313.636	＞10天	11	＞3000	3450	HCG	2	4	1	继发不孕	0.65	＞24	25.4	混合因素	7	7.98	1831	3.46	5	12.89	6.72	25.52	4	5	11.7	B	ICSI	1	0	1	0	0	0	0	否	否	全胚冷冻
973	0	2016090031	徐艳俊	＜35	31	2	降调节方案	3	245	＞10天	15	＞3000	3675	HCG	7	1	1	继发不孕	2.23	＞24	25.3	男方因素	4	2.8	1373	1.35	7	6.98	6.72	47.4	1	19	11.4	A	ICSI	4	0	0	0	0	0	0	是		无可移植胚胎
1582	1	2016030047	王传冬	≥35	42	1	刺激方案	1	300	≤10天	10	≤3000	3000	HCG	2	4	1	继发不孕	0.64	＞24	25.4	混合因素	3	8.43	1042	1.76	3	12.89	6.72	25.52	4	5	6.1	B	ICSI	2	0	2	0	0	0	0	否	否	全胚冷冻
[truncated: 281 more rows]
[truncated: 6 more columns]
