# Supplementary material for: More exogenous Gn starting doses are not beneficial for poor ovarian responders in POSEIDON groups: a propensity score matching retrospective cohort study
Source: Research Square preprint supplement (doi:10.21203/rs.3.rs-6441527/v1), 2025-08-06
Supplement: Supplementary file 4 [file d820716dd32487156a5892ba.xlsx]

## Sheet: IVF-ICSI
ID	分组	病历号	姓名	年龄分组	年龄	第几取卵	COS方案	COH分组	每日Gn	Gn天数分组	Gn天数	Gn总量分组	Gn总量	扳机	不孕年限	孕次	产次	不孕类型	AMH	BMI分组	体重指数	诊断	扳机日卵泡数	扳机日LH	扳机日E2	扳机日P	获卵数	基础FSH	基础LH	基础E2	波塞冬分组	AFC	扳机日内膜厚度	扳机日内膜形态	实验室授精方式	正常受精卵子总数	有效囊胚	有效胚胎	优质胚胎	新鲜移植胚胎总数	D234移植个数	D567移植个数	周期取消	鲜胚移植	周期结局	妊娠结果	临床妊娠	妊娠类型	妊娠诊断
219	1	C00010294	赵珍	≥35	37	1	降调节方案	3	418.75	＞10天	12	＞3000	5025	HCG	5	3	1	继发不孕	2.07	≤24	21.6	女方因素	8	0.63	1634	1.38	9	8.41	2.03	25	2	15	0.88	A	IVF	5	2	4	0	0	0	0	否	否	全胚冷冻
474	0	C00011819	冯明明	≥35	35	1	降调节方案	3	229.545	＞10天	11	≤3000	2525	HCG	1	1	1	继发不孕	1.99	≤24	22.2	混合因素	6	1.77	1791	1.02	7	5.07	2.03	24.27	2	12	15	A	ICSI	3	0	2	2	2	2	0	否	是	移植	已妊娠	临床妊娠	宫内妊娠	双胎宫内妊娠
832	0	C00018719	时春梅	≥35	41	1	拮抗剂方案	2	225	≤10天	8	≤3000	1800	HCG	1	3	2	继发不孕	1.81	≤24	22.6	女方因素	5	10.38	1426.56	1	3	8.73	2.06	46.2	2	9	11.7	B	IVF	1	0	1	1	1	1	0	否	是	移植	未妊娠
412	0	2017080239	王海晶	＜35	27	1	降调节方案	3	225	＞10天	11	≤3000	2475	HCG	2	0	0	原发不孕	3.4	＞24	24.8	女方因素	8	1.15	1360	0.63	7	7.89	2.07	50	1	14	11.8	A	IVF	7	0	6	2	2	2	0	否	是	移植	已妊娠	临床妊娠	宫内妊娠	单胎宫内妊娠
321	1	2016100074	卜淑娟	≥35	36	6	刺激方案	1	300	≤10天	9	≤3000	2700	HCG	5	3	0	继发不孕	2.42	≤24	16.4	女方因素	7	0.97	2162	1.37	8	7.38	2.08	40.21	2	9	10.2		IVF	4	0	2	1	0	0	0	否	否	全胚冷冻
578	0	2017080004	卜淑娟	≥35	37	7	拮抗剂方案	2	279.545	＞10天	11	＞3000	3075	HCG	7	3	0	继发不孕	2.28	≤24	16.4	女方因素	6	1.3	1648	2.19	3	7.38	2.08	33.77	2	8	11.5	A	IVF	3	0	0	0	0	0	0	是		无可移植胚胎
737	0	2016060225	卜淑娟	≥35	36	5	刺激方案	1	281.25	≤10天	8	≤3000	2250	HCG	5	3	0	继发不孕	1.3	≤24	16.4	女方因素	5	2.01	1461	1.73	4	7.38	2.08	81.1	2	8	11.9	A	IVF	4	0	2	0	2	2	0	否	是	移植	未妊娠
210	1	2017060207	张延云	＜35	31	1	降调节方案	3	316.071	＞10天	14	＞3000	4425	HCG	3	2	1	继发不孕	4.5	＞24	25	女方因素	8	1.37	1808	0.34	8	4.74	2.1	39	1	11	14	A	IVF	3	0	2	1	2	2	0	否	是	移植	已妊娠	临床妊娠	宫内妊娠	单胚胎停
1017	1	C00007557	张琳	≥35	36	1	降调节方案	3	292.5	≤10天	10	≤3000	2925	HCG	4	2	0	继发不孕	1.55	＞24	25.7	女方因素	4	1.27	1202	1.24	8	11.32	2.1	69	2	12	0.83	A-B	IVF	3	1	4	1	2	2	0	否	是	移植	未妊娠
1079	0	C00015570	李林	≥35	36	2	拮抗剂方案	2	225	≤10天	9	≤3000	2025	HCG	1	1	0	继发不孕	2.27	≤24	22.6	女方因素	4	2.05	1556	0.48	4	5.64	2.11	21	2	9	1.08	A	IVF	0	1	1	0	0	0	0	否	否	全胚冷冻
1388	1	C00011770	李林	≥35	35	1	刺激方案	1	400	≤10天	7	≤3000	2800	HCG	1	0	0	原发不孕	1.33	≤24	22.6	女方因素	3	6.14	907	0.76	5	5.64	2.11	21	2	11	0.6	B	IVF	1	0	2	0	0	0	0	否	否	全胚冷冻
1370	0	2018010087	魏洁	≥35	35	1	刺激方案	1	278.571	≤10天	7	≤3000	1950	HCG	10	0	0	原发不孕	2.55	＞24	24.6	女方因素	3	6.65	491	0.3	1	5.14	2.12	31.75	2	8	7.8	B	IVF	1	0	1	0	0	0	0	否	否	全胚冷冻
464	0	2017070082	李祥敏	≥35	38	4	降调节方案	3	283.333	≤10天	9	≤3000	2550	HCG	2	2	1	继发不孕	1.51	≤24	20.2	女方因素	6	12	1855	1.6	6	5.04	2.14	59.09	2	9	6	B	IVF	3	0	2	0	0	0	0	否	否	全胚冷冻
708	0	2016090130	李祥敏	≥35	37	2	刺激方案	1	283.333	≤10天	9	≤3000	2550	HCG	1	1	1	继发不孕	1.25	≤24	20.2	女方因素	5	12.44	1646.47	2.1	3	5.04	2.14	59.09	2	9	5	B	IVF	2	0	1	0	0	0	0	否	否	全胚冷冻
981	1	2016050085	李祥敏	≥35	37	1	降调节方案	3	381.25	＞10天	12	＞3000	4575	HCG	1	1	1	继发不孕	2.44	≤24	20.2	女方因素	4	1.7	1350	1.23	2	5.04	2.14	39.09	2	10	9.4	B	IVF	2	0	2	0	2	2	0	否	是	移植	未妊娠
1114	0	2016100053	李祥敏	≥35	37	3	刺激方案	1	278.571	＞10天	14	＞3000	3900	HCG	1	1	1	继发不孕	2.26	≤24	20.2	女方因素	4	1.9	1392	1.1	3	5.04	2.14	59.09	2	9	8	B	IVF	1	0	1	0	0	0	0	否	否	全胚冷冻
357	1	2017110223	刘琳	≥35	35	2	降调节方案	3	308.333	＞10天	18	＞3000	5550	HCG	1	2	1	继发不孕	1.6	＞24	24.6	女方因素	7	1.07	1820	0.56	5	6.53	2.15	59.09	2	11	13.8	A-B	IVF	3	1	3	0	0	0	0	否	否	全胚冷冻
1352	1	C00004266	刘爽	＜35	33	1	降调节方案	3	356.25	≤10天	8	≤3000	2850	HCG	3	1	0	原发不孕	1.7	≤24	22	女方因素	3	0.47	573	0.31	2	9.03	2.15	30	1	10	10.4	A	IVF	0	0	0	0	0	0	0	是		无可移植胚胎
48	0	C00003760	皇甫存存	＜35	31	1	降调节方案	3	167.308	＞10天	13	≤3000	2175	HCG	1	1	0	继发不孕	1.35	≤24	15.2	女方因素	9	1.66	2031	1.08	7	5.16	2.16	44	1	14	9	A	IVF	4	1	3	1	2	2	0	否	是	移植	未妊娠
1750	0	C00011926	陈泽玲	＜35	31	1	拮抗剂方案	2	235.714	≤10天	7	≤3000	1650	HCG	7	0	0	原发不孕	1.64	＞24	31.2	混合因素	2	3.48	631	0.35	2	5.16	2.16	44	1	10	11.4	B	ICSI	1	0	0	0	0	0	0	是		无可移植胚胎
1757	1	C00015396	陈泽玲	＜35	31	2	拮抗剂方案	2	300	＞10天	12	＞3000	3600	HCG	7	0	0	原发不孕	2.85	＞24	31.2	混合因素	2	1.39	616	0.59	5	5.16	2.16	44	1	12	13.1	B	ICSI	3	1	1	0	0	0	0	否	否	全胚冷冻
260	0	C00008118	张启艳	≥35	42	3	降调节方案	3	247.5	≤10天	10	≤3000	2475	HCG	2	4	1	继发不孕	2.24	≤24	24	男方因素	7	0.46	1567	0.82	7	8.05	2.17	106.43	2	16	7.5	A	ICSI	3	0	3	0	2	2	0	否	是	移植	未妊娠
352	1	C00004390	张启艳	≥35	41	2	降调节方案	3	316.667	≤10天	9	≤3000	2850	HCG	2	4	1	继发不孕	1.47	≤24	24	女方因素	7	0.45	1839	1.12	8	8.05	2.17	66.43	2	15	11.3	A	IVF	0	0	0	0	0	0	0	否	否	全胚冷冻
386	0	C00014974	陈双	＜35	33	1	拮抗剂方案	2	281.25	≤10天	8	≤3000	2250	HCG	4	2	0	继发不孕	2.26	＞24	24.7	女方因素	7	4	1554	1.02	5	8.33	2.17	45	1	8	13.7	A	IVF	5	0	2	1	2	2	0	否	是	移植	未妊娠
393	1	C00018544	陈双	＜35	33	2	降调节方案	3	300	＞10天	16	＞3000	4800	HCG	4	2	0	继发不孕	1.62	＞24	24.7	女方因素	7	1.51	1400.54	1.11	3	8.33	2.17	45	1	8	1.26	B	IVF	3	0	1	1	0	0	0	否	否	全胚冷冻
940	0	2016040293	李海风	≥35	39	2	降调节方案	3	225	＞10天	11	≤3000	2475	HCG	3	1	0	继发不孕	1.96	＞24	25.7	女方因素	4	1.21	811	0.42	5	9.35	2.19	34	2	9	9	A	IVF	4	0	2	1	2	2	0	否	是	移植	未妊娠
831	0	C00004576	司倩倩	＜35	34	1	降调节方案	3	252.273	＞10天	11	≤3000	2775	HCG	3	5	0	继发不孕	2.3	≤24	23	女方因素	5	5.06	1434	1.05	7	7.89	2.2	41	1	12	7.8	A	IVF	6	0	4	3	2	2	0	否	是	移植	未妊娠
1587	1	C00010094	乔秀颐	≥35	39	1	拮抗剂方案	2	335	≤10天	10	＞3000	3350	HCG	1	0	0	原发不孕	1.28	≤24	20.4	女方因素	3	1.83	1034	0.38	3	6.77	2.21	73	2	9	9.8	A	IVF	3	0	2	0	0	0	0	否	否	全胚冷冻
1701	0	C00011340	乔秀颐	≥35	40	3	拮抗剂方案	2	150	≤10天	5	≤3000	750	HCG	1	0	0	原发不孕	1.5	≤24	20.4	女方因素	2	2.1	752	0.28	2	6.77	2.21	73	2	9	0.9	A-B	IVF	1	0	1	1	1	1	0	否	是	移植	已妊娠	临床妊娠	宫外妊娠	异位妊娠
621	0	2017090258	马天燕	＜35	34	1	降调节方案	3	184.091	＞10天	11	≤3000	2025	HCG	2	2	1	继发不孕	2.09	≤24	22	女方因素	6	0.51	1306	0.68	8	7.17	2.22	65.76	1	16	11	A-B	IVF	7	0	2	1	2	2	0	否	是	移植	已妊娠	临床妊娠	宫内妊娠	双胎宫内妊娠
895	1	C00018304	李玲	≥35	37	1	刺激方案	1	300	＞10天	11	＞3000	3300	HCG	4	0	0	原发不孕	1.3	≤24	22.7	男方因素	5	1.87	1052.14	0.78	4	7.82	2.22	14	2	8	5.6	B	ICSI	1	0	1	1	0	0	0	否	否	全胚冷冻
927	1	C00019249	李玲	≥35	38	2	刺激方案	1	375	≤10天	10	＞3000	3750	HCG	1	0	0	原发不孕	1.75	≤24	22.7	男方因素	4	7.34	883.58	1.12	1	7.82	2.22	14	2	6	7.3	B	ICSI	1	0	0	0	0	0	0	是		无可移植胚胎
1503	1	C00017927	王世英	≥35	39	1	刺激方案	1	300	≤10天	10	≤3000	3000	HCG	1	3	1	继发不孕	1.34	＞24	29.7	女方因素	3	12.67	952	4.39	2	5.08	2.22	55	2	8	6.2	C	IVF	1	0	0	0	0	0	0	是		无可移植胚胎
1507	1	C00018798	王世英	≥35	39	2	刺激方案	1	300	≤10天	5	≤3000	1500	HCG	1	3	1	继发不孕	2.340	＞24	29.7	女方因素	3	3.79	892	0.95	3	5.08	2.22	55	2	8	9.1	B-C	IVF	1	0	0	0	0	0	0	是		无可移植胚胎
949	0	C00005494	李媛媛	≥35	39	3	拮抗剂方案	2	225	≤10天	6	≤3000	1350	HCG	1	4	1	继发不孕	1.67	＞24	26.7	女方因素	4	1.59	708	1.55	5	5.98	2.24	31	2	8	11.2	A-B	IVF	1	0	0	0	0	0	0	是		无可移植胚胎
1092	0	C00008571	李媛媛	≥35	39	5	刺激方案	1	281.25	≤10天	8	≤3000	2250	HCG	1	4	1	继发不孕	2.55	＞24	26.7	女方因素	4	10.18	1472	1.01	4	5.98	2.24	51	2	8	0.73	A-B	IVF	3	0	2	0	0	0	0	否	否	全胚冷冻
1195	0	2017030021	李媛媛	≥35	36	1	降调节方案	3	158.333	≤10天	9	≤3000	1425	HCG	2	0	0	继发不孕	2.8	＞24	26.7	女方因素	4	6.17	1067	0.63	3	5.98	2.24	56.45	2	12	12.1	A-B	IVF	2	0	1	0	0	0	0	否	否	全胚冷冻
1664	1	C00007363	李媛媛	≥35	39	4	刺激方案	1	300	≤10天	9	≤3000	2700	双扳机	1	4	1	继发不孕	1.2	＞24	26.7	女方因素	2	7.87	835	0.93	3	5.98	2.24	73.77	2	8	0.75	A-B	IVF	3	0	2	1	0	0	0	否	否	全胚冷冻
421	1	2017030092	鲁桂芹	≥35	38	3	刺激方案	1	405	＞10天	15	＞3000	6075	HCG	1	1	0	继发不孕	2.64	＞24	29.3	女方因素	7	0.95	1010	1.7	8	8.25	2.25	34.76	2	10	10.6	A	IVF	2	0	2	1	0	0	0	否	否	全胚冷冻
1064	0	2018010047	鲁桂芹	≥35	38	4	刺激方案	1	217.5	≤10天	10	≤3000	2175	HCG	1	2	0	继发不孕	1.44	＞24	29.3	不明原因	4	5.48	1638	0.62	5	8.25	2.25	76.43	2	10	9.4	B	IVF	4	0	2	1	0	0	0	否	否	全胚冷冻
470	0	2017050093	姜林君	＜35	28	2	刺激方案	1	215.625	≤10天	8	≤3000	1725	HCG	3	0	0	原发不孕	3.05	≤24	22.4	男方因素	6	1.11	1814	1.37	6	7.32	2.26	49.09	1	10	14.7		ICSI	4	0	1	0	0	0	0	否	否	全胚冷冻
661	0	C00003376	陈昕	＜35	32	2	降调节方案	3	140	≤10天	10	≤3000	1400	HCG	3	1	0	继发不孕	4.2	＞24	25.7	混合因素	5	0.54	435	0.37	1	5.72	2.26	34	1	30	10.2	A-B	ICSI	1	0	1	0	1	1	0	否	是	移植	未妊娠
840	1	2018030253	赵荣雪	≥35	39	2	刺激方案	1	375	≤10天	9	＞3000	3375	HCG	3	4	1	继发不孕	1.76	＞24	26	女方因素	5	6.63	1375	0.68	9	8.75	2.26	38	2	11	7.4	A	IVF	3	0	2	0	0	0	0	否	否	全胚冷冻
382	1	2018020066	司桂香	≥35	42	1	降调节方案	3	375	≤10天	10	＞3000	3750	HCG	2	2	1	继发不孕	2.42	＞24	26	男方因素	7	2.74	1584	1.46	6	6.66	2.27	33.77	2	8	11.6		ICSI	3	0	2	1	2	2	0	否	是	移植	未妊娠
473	1	C00010143	范丽红	＜35	34	1	降调节方案	3	432.353	＞10天	17	＞3000	7350	HCG	2	1	1	继发不孕	2.22	＞24	28.5	女方因素	6	2.29	1798	1.05	7	8.68	2.28	43	1	13	12.5	B	IVF	6	0	4	1	2	2	0	否	是	移植	未妊娠
745	1	2016040203	王霞	＜35	34	1	刺激方案	1	300	≤10天	9	≤3000	2700	HCG	3	1	1	继发不孕	2.17	＞24	25.2	不明原因	5	1.76	1422	0.93	7	5.36	2.28	78	1	13	16	B	IVF	5	0	2	0	2	2	0	否	是	移植	已妊娠	临床妊娠	宫内妊娠	单胎宫内妊娠
1283	0	2016010123	徐传梅	＜35	34	1	降调节方案	3	233.333	＞10天	12	≤3000	2800	HCG	3	1	1	继发不孕	1.22	≤24	23.4	混合因素	3	1.24	828	1.38	2	8.68	2.28	43	1	7	10.2	A	ICSI	1	0	1	0	1	1	0	否	是	移植	未妊娠
3	1	2017110141	刘希香	≥35	44	1	降调节方案	3	305.357	＞10天	14	＞3000	4275	HCG	1	4	1	继发不孕	1.22	＞24	28	女方因素	10	0.76	2535	0.89	7	8.56	2.29	70.1	2	15	13.7	A	IVF	3	0	2	0	2	2	0	否	是	移植	未妊娠
365	1	2016060005	毕海段	≥35	36	1	刺激方案	1	351.923	＞10天	13	＞3000	4575	HCG	1	3	1	继发不孕	1.71	≤24	22.5	女方因素	7	0.92	1767	0.99	6	7.31	2.29	65.76	2	8	11.6	A	IVF	4	0	1	1	1	1	0	否	是	移植	未妊娠
717	1	2016090213	毕海段	≥35	36	2	刺激方案	1	300	＞10天	11	＞3000	3300	HCG	1	3	1	继发不孕	1.33	≤24	22.5	女方因素	5	0.4	1600	1.16	6	7.31	2.29	34.76	2	8	9	B	IVF	5	0	2	1	2	2	0	否	是	移植	未妊娠
220	1	C00012340	王小霞	≥35	37	1	拮抗剂方案	2	329.167	≤10天	9	≤3000	2962.5	HCG	8	3	1	继发不孕	2.24	＞24	25.4	混合因素	8	2.42	1634	0.16	6	9.38	2.3	38	2	11	12.5	A	ICSI	2	0	2	1	2	2	0	否	是	移植	已妊娠	临床妊娠	宫内妊娠	单胎宫内妊娠
27	0	2016080161	刘艳霞	＜35	32	2	降调节方案	3	289.286	＞10天	14	＞3000	4050	HCG	6	0	0	原发不孕	2.1	≤24	20.3	混合因素	10	1.5	1621	1.02	8	10.13	2.32	25.42	1	16			ICSI	4	0	1	0	1	1	0	否	是	移植	未妊娠
532	0	2016060091	刘艳霞	＜35	31	1	刺激方案	1	281.25	≤10天	8	≤3000	2250	HCG	6	0	0	原发不孕	3.70	≤24	20.3	女方因素	6	0.93	2085	1.37	6	10.13	2.32	25.42	1	16	13	A	IVF	3	0	0	0	0	0	0	是		无可移植胚胎
1425	0	2017110083	江延珍	＜35	34	1	降调节方案	3	143.75	＞10天	12	≤3000	1725	HCG	2	2	0	继发不孕	1.36	＞24	26.7	女方因素	5	1.62	1455	0.68	7	5.07	2.32	39	1	15	10.8	B	IVF	7	0	7	5	2	2	0	否	是	移植	未妊娠
125	0	C00005254	史俊	≥35	38	1	降调节方案	3	175	＞10天	15	≤3000	2625	HCG	10	1	1	继发不孕	2.15	＞24	31.9	女方因素	8	0.36	1977	1.34	7	5.92	2.34	33	2	49	7.3	B	IVF	6	0	2	0	0	0	0	否	否	全胚冷冻
1187	0	2017030193	李寿勤	＜35	26	1	降调节方案	3	256.25	＞10天	12	＞3000	3075	HCG	4	0	0	原发不孕	1.67	≤24	19.7	女方因素	4	1.27	1112	0.81	5	6.66	2.36	44.07	1	7	14.9	A	IVF	5	0	2	1	2	2	0	否	是	移植	已妊娠	临床妊娠	宫内妊娠	单胎宫内妊娠
302	0	2017010058	王一帆	＜35	33	1	降调节方案	3	207.5	≤10天	10	≤3000	2075	HCG	2	0	0	继发不孕	2.83	≤24	22.6	不明原因	10	3.37	1641	0.87	7	8.28	2.37	36.43	1	12	17	B	IVF	7	0	6	1	0	0	0	否	否	全胚冷冻
1142	1	C00012754	刘秀秀	＜35	32	1	刺激方案	1	363.462	＞10天	13	＞3000	4725	HCG	8	1	1	继发不孕	1.24	≤24	22.9	女方因素	4	2.68	1304	0.21	6	5.59	2.38	40	1	15	11.5	B	IVF	6	0	4	1	2	2	0	否	是	移植	已妊娠	临床妊娠	宫内妊娠	单胎宫内妊娠
1961	1	C00017626	孙彦玲	≥35	37	2	拮抗剂方案	2	290.625	≤10天	8	≤3000	2325	双扳机	3	5	1	继发不孕	1.70	≤24	23.5	女方因素	2	6.44	484	1.03	1	5.59	2.38	40	2	11	6.8	A	IVF	1	0	1	0	0	0	0	否	否	全胚冷冻
5	1	2017030316	郑广健	≥35	39	1	刺激方案	1	375	≤10天	8	≤3000	3000	HCG	3	7	1	继发不孕	1.8	＞24	24.2	女方因素	10	2.16	2267	1.01	6	7.56	2.39	43.5	2	10	7.5	B	IVF	5	0	2	0	0	0	0	否	否	全胚冷冻
80	1	2018020008	仲伟梅	＜35	30	1	降调节方案	3	330	＞10天	15	＞3000	4950	HCG	3	0	0	原发不孕	1.37	≤24	21.2	女方因素	9	1.97	2251	0.96	6	7.77	2.39	91.75	1	12	14.4	A-B	IVF	3	0	1	0	1	1	0	否	是	移植	已妊娠	临床妊娠	宫内妊娠	单胎宫内妊娠
634	0	C00003309	朱宁文	＜35	32	1	降调节方案	3	275	＞10天	15	＞3000	4125	HCG	3	3	1	继发不孕	1.87	＞24	28.2	女方因素	6	1.09	1001	0.69	6	9.43	2.39	60	1	9	13.2	A-B	IVF	5	0	4	2	2	2	0	否	是	移植	未妊娠
970	1	C00016673	郑妮	≥35	38	6	刺激方案	1	300	≤10天	10	≤3000	3000	HCG	5	2	1	继发不孕	2.56	＞24	24.4	女方因素	4	14.1	1388.07	1.82	3	8.5	2.39	102	2	10	3.3	B	IVF	3	0	1	1	0	0	0	否	否	全胚冷冻
1045	1	C00014153	郑妮	≥35	37	5	刺激方案	1	300	≤10天	9	≤3000	2700	HCG	5	2	1	继发不孕	1.50	＞24	24.4	女方因素	4	1.93	1772	1.11	4	8.5	2.39	43.5	2	7	8.7	A-B	IVF	3	0	3	2	2	2	0	否	是	移植	未妊娠
1783	0	C00003667	郑妮	≥35	35	3	刺激方案	1	283.929	＞10天	14	＞3000	3975	HCG	2	2	1	继发不孕	1.3	＞24	24.4	女方因素	2	2.16	576	0.57	2	8.5	2.39	31.76	2	10	8.1	A-B	IVF	1	0	0	0	0	0	0	是		无可移植胚胎
123	1	2017080200	王小娟	＜35	30	2	降调节方案	3	325	≤10天	9	≤3000	2925	HCG	7	1	0	原发不孕	2.77	＞24	28	男方因素	9	0.61	1094	1.59	5	5.9	2.42	42	1	12			ICSI	1	0	1	0	1	1	0	否	是	移植	已妊娠	临床妊娠	宫内妊娠	单胎宫内妊娠
78	0	2017040032	岳桃	＜35	28	1	降调节方案	3	225	＞10天	12	≤3000	2700	HCG	3	1	1	继发不孕	3.65	＞24	25.6	混合因素	9	2.13	2263	1.78	7	4.21	2.43	39	1	13	14.3	A-B	ICSI	4	0	2	0	0	0	0	否	否	全胚冷冻
1577	1	2017040142	杨明臻	≥35	40	1	降调节方案	3	302.885	＞10天	26	＞3000	7875	HCG	10	0	0	继发不孕	1.44	＞24	25	混合因素	3	4.07	1063	0.71	4	6.91	2.43	50.1	2	7	18.7	B	ICSI	2	0	2	0	0	0	0	否	否	全胚冷冻
269	1	2017080156	韩帼	＜35	31	3	刺激方案	1	300	＞10天	12	＞3000	3600	HCG	5	0	0	原发不孕	2.72	≤24	18.4	男方因素	7	11.4	2301	1.43	8	7.02	2.44	73.4	1	14	6.7	B	ICSI	4	0	2	0	0	0	0	否	否	全胚冷冻
1208	0	2016110280	韩帼	＜35	30	2	降调节方案	3	288.462	＞10天	13	＞3000	3750	HCG	5	0	0	原发不孕	2.99	≤24	18.4	男方因素	4	1.72	1006	0.51	5	7.02	2.44	73.4	1	14	13.7	A	ICSI	3	0	1	1	1	1	0	否	是	移植	未妊娠
2132	0	2016110143	王梓琪	＜35	28	2	降调节方案	3	155.357	＞10天	14	≤3000	2175	HCG	4	0	0	原发不孕	3.43	≤24	21.7	女方因素	1	1.63	412	0.45	1	6.89	2.44	56.43	1	18	12.1	B	IVF	1	0	0	0	0	0	0	是		无可移植胚胎
234	1	2017070155	杨本兰	≥35	35	1	降调节方案	3	309.375	＞10天	16	＞3000	4950	HCG	4	2	0	继发不孕	2.64	＞24	48.7	女方因素	8	0.66	1204	0.45	6	4.85	2.45	29	2	23	15	B	IVF	6	0	3	1	0	0	0	否	否	全胚冷冻
1771	1	2017050221	王春荣	＜35	29	1	刺激方案	1	300	≤10天	7	≤3000	2100	HCG	2	0	0	原发不孕	2.340	≤24	22.1	混合因素	2	10.14	599	0.46	2	10.04	2.45	17	1	8	5.7	A-B	ICSI	2	0	2	0	0	0	0	否	否	全胚冷冻
2042	1	C00018334	孟红英	≥35	35	1	拮抗剂方案	2	345.455	＞10天	11	＞3000	3800	HCG	5	1	0	继发不孕	1.84	＞24	27.2	混合因素	1	8.16	661.85	1.19	2	8.4	2.45	34.56	2	7	7.5	A	ICSI	1	0	1	1	1	1	0	否	是	移植	已妊娠	临床妊娠	宫内妊娠	单胎宫内妊娠
310	0	C00004421	李秀芳	≥35	41	2	降调节方案	3	236.538	＞10天	13	＞3000	3075	HCG	2	2	1	继发不孕	1.2	≤24	20.8	女方因素	7	0.68	2253	1.31	7	8.58	2.48	59.09	2	8	11.9	A-B	IVF	4	2	2	0	0	0	0	否	否	全胚冷冻
2009	0	2018050218	李秀芳	≥35	40	1	刺激方案	1	150	≤10天	6	≤3000	900	HCG	2	2	1	继发不孕	1.95	≤24	20.8	女方因素	1	1.43	920	0.89	3	8.58	2.48	59.09	2	7	10.3	A	IVF	3	0	2	1	2	2	0	否	是	移植	未妊娠
54	0	C00017332	牛兆翠	＜35	34	2	降调节方案	3	275	≤10天	10	≤3000	2750	HCG	9	0	0	原发不孕	3.06	≤24	22.7	女方因素	9	1.44	2923	0.97	9	7.14	2.49	40	1	20	10.7	A	IVF	7	0	2	1	2	2	0	否	是	移植	未妊娠
237	1	C00015283	魏芳玲	≥35	37	1	拮抗剂方案	2	359.375	≤10天	8	≤3000	2875	HCG	2	2	1	继发不孕	3.13	＞24	29.3	女方因素	8	1.25	1159	0.49	8	7.14	2.49	40	2	14	14.6	A-B	IVF	3	0	2	1	2	2	0	否	是	移植	已妊娠	临床妊娠	宫内妊娠	单胚胎停
262	1	C00016648	贾晓婷	＜35	28	2	降调节方案	3	381.818	＞10天	11	＞3000	4200	HCG	1	0	0	继发不孕	2.19	＞24	24.6	女方因素	7	2.55	1548	1.24	6	8.76	2.49	27	1	10	12.2	B	IVF	3	2	2	0	1	0	1	否	是	移植	已妊娠	临床妊娠	宫内妊娠	单胎宫内妊娠
33	0	2017090079	吴海燕	≥35	39	2	降调节方案	3	287.5	＞10天	12	＞3000	3450	HCG	2	4	1	继发不孕	2.36	＞24	25.3	女方因素	9	1.07	1481	0.46	9	7.34	2.5	43.5	2	18	9.2	A	IVF	0	0	1	0	0	0	0	否	否	全胚冷冻
102	0	C00019039	袁轶男	≥35	38	1	拮抗剂方案	2	225	≤10天	7	≤3000	1575	HCG	1	1	1	继发不孕	3.4	≤24	22.8	女方因素	7	2.35	1589	0.66	8	7.05	2.5	42.66	2	15	1.16	A-B	IVF	5	0	5	2	2	2	0	否	是	移植	未妊娠
300	0	C00006899	王雪	＜35	29	1	降调节方案	3	236.538	＞10天	13	＞3000	3075	HCG	3	2	0	继发不孕	2.41	≤24	20.8	女方因素	7	0.84	2660	1.19	7	8.5	2.5	35	1	17	0.92	A	IVF	3	1	3	0	0	0	0	否	否	全胚冷冻
460	1	C00016738	王静	≥35	39	4	刺激方案	1	300	＞10天	17	＞3000	5100	HCG	4	2	1	继发不孕	2.03	≤24	20.2	混合因素	6	13.4	1684	1.77	5	10.1	2.5	36	2	8	0.78	A	ICSI	5	0	2	0	0	0	0	否	否	全胚冷冻
552	0	2016030262	田媛	≥35	36	1	拮抗剂方案	2	246.429	≤10天	7	≤3000	1725	HCG	7	0	0	原发不孕	1.86	＞24	24.4	女方因素	6	3.11	1883	0.76	6	7.05	2.5	42.66	2	9	13.1	B	IVF	5	0	2	0	2	2	0	否	是	移植	未妊娠
702	0	C00018030	郭艳华	＜35	30	1	拮抗剂方案	2	278.571	≤10天	7	≤3000	1950	HCG	4	2	1	继发不孕	2.09	≤24	19.8	女方因素	5	0.49	1683.21	0.69	6	16.7	2.5	52.8	1	11	12.6	A	IVF	4	0	2	0	0	0	0	否	否	全胚冷冻
1768	0	2017060032	陈美玲	＜35	30	4	降调节方案	3	115.385	＞10天	13	≤3000	1500	HCG	1	2	0	继发不孕	3.54	＞24	26	不明原因	2	1.71	602	0.78	2	6.32	2.5	51.38	1	20	9.6	A	IVF	2	0	1	0	1	1	0	否	是	移植	未妊娠
67	0	2016080188	鞠孟杰	＜35	27	1	降调节方案	3	184.615	＞10天	13	≤3000	2400	HCG	5	0	0	原发不孕	4.03	≤24	20.6	女方因素	9	5.37	2606	0.96	7	7.19	2.51	59.09	1	18	12.1	A	IVF	6	0	1	0	1	1	0	否	是	移植	已妊娠	临床妊娠	宫内妊娠	单胎宫内妊娠
90	1	2016100093	高羽	＜35	34	2	刺激方案	1	362.5	＞10天	12	＞3000	4350	HCG	1	5	0	继发不孕	4.62	＞24	25.2	女方因素	9	1.21	2060	0.97	8	5.76	2.51	43	1	11	6.3	A-B	IVF	5	0	4	1	0	0	0	否	否	全胚冷冻
1054	0	C00009986	霍秋红	≥35	41	2	拮抗剂方案	2	255	≤10天	10	≤3000	2550	双扳机	7	6	0	继发不孕	1.25	＞24	25.2	女方因素	4	3.93	1700	0.93	6	9.31	2.51	45	2	8			IVF	1	0	1	0	1	1	0	否	是	移植	未妊娠
728	1	C00016216	马杰	≥35	40	1	降调节方案	3	300	＞10天	11	＞3000	3300	HCG	1	4	1	继发不孕	1.58	＞24	25	女方因素	5	1.22	1528	0.55	5	8.68	2.55	57	2	10	18.4	B	IVF	4	0	0	0	0	0	0	是		无可移植胚胎
866	0	C00005637	黄传兰	＜35	33	3	刺激方案	1	262.5	≤10天	10	≤3000	2625	HCG	4	0	0	原发不孕	2.16	＞24	28.4	男方因素	5	5.51	1206	1.04	4	7.48	2.55	46.81	1	11	12.6	A	ICSI	3	0	2	0	2	2	0	否	是	移植	已妊娠	临床妊娠	宫内妊娠	单胎宫内妊娠
1982	0	2016060230	李海霞	≥35	37	2	降调节方案	3	256.25	＞10天	12	＞3000	3075	HCG	6	1	1	继发不孕	2.67	＞24	29.8	女方因素	2	0.84	414	0.42	2	7.86	2.55	35.42	2	20	13.4	A	IVF	2	0	2	0	2	2	0	否	是	移植	已妊娠	临床妊娠	宫内妊娠	单胚胎停
1153	0	2017070253	赵美玲	＜35	32	1	降调节方案	3	275	＞10天	12	＞3000	3300	HCG	9	1	0	继发不孕	1.6	≤24	17.4	女方因素	4	0.81	1246	1.01	4	9.36	2.56	37	1	11	12.2	A	IVF	4	0	3	0	2	2	0	否	是	移植	已妊娠	临床妊娠	宫内妊娠	单胎宫内妊娠
1779	0	C00006020	赵芬燕	＜35	34	1	降调节方案	3	279.545	＞10天	11	＞3000	3075	HCG	4	2	0	继发不孕	1.3	≤24	20.6	女方因素	2	2.03	583	0.16	2	7.94	2.58	26	1	9	9.3	A	IVF	2	0	2	0	2	2	0	否	是	移植	已妊娠	临床妊娠	宫内妊娠	单胎宫内妊娠
566	1	2016080120	李秀梅	≥35	41	3	刺激方案	1	300	≤10天	7	≤3000	2100	HCG	1	4	1	继发不孕	1.7	＞24	26	混合因素	6	1.28	1798	0.91	4	9.56	2.59	39	2	8	7.2	B	ICSI	4	0	3	1	0	0	0	否	否	全胚冷冻
299	0	C00004757	臧芹	≥35	41	2	降调节方案	3	245.192	＞10天	13	＞3000	3187.5	HCG	3	4	0	继发不孕	1.75	≤24	23.5	女方因素	7	0.82	2663	0.48	4	5.75	2.6	74	2	14	9.8	A	IVF	2	0	0	0	0	0	0	否	否	全胚冷冻
811	1	2018060160	王玲玲	≥35	35	1	降调节方案	3	395.455	＞10天	11	＞3000	4350	HCG	2	5	1	继发不孕	1.56	＞24	28	女方因素	5	1.07	1557	0.72	5	6.83	2.6	31	2	10	8.8	B	IVF	4	0	2	0	2	2	0	否	是	移植	已妊娠	临床妊娠	宫内妊娠	单胎宫内妊娠
1844	0	C00005239	李延美	≥35	36	1	刺激方案	1	150	≤10天	8	≤3000	1200	HCG	4	3	1	继发不孕	1.58	＞24	24.6	女方因素	2	1.61	451	0.35	0	6.68	2.6	56	2	14	11.6	B		0	0	0	0	0	0	0	是		未取到卵
261	0	C00017129	陈莹莹	≥35	35	1	降调节方案	3	225	≤10天	8	≤3000	1800	HCG	5	2	1	继发不孕	2.49	＞24	28.5	女方因素	7	3.07	1560	0.91	6	6.47	2.61	34	2	16	6.1	A	IVF	3	0	1	0	1	1	0	否	是	移植	未妊娠
426	0	C00018943	李静	≥35	36	1	降调节方案	3	245	≤10天	10	≤3000	2450	HCG	4	5	2	继发不孕	2.33	≤24	21.9	男方因素	7	1.07	1838	1.26	9	7.55	2.61	28.96	2	20	14.9	B	ICSI	3	0	2	1	2	2	0	否	是	移植	已妊娠	临床妊娠	宫内妊娠	单胚胎停
150	0	2017110276	邱发溪	≥35	36	1	降调节方案	3	240.909	＞10天	11	≤3000	2650	HCG	1	3	1	继发不孕	4.48	≤24	22.2	不明原因	8	1.17	1960	1.25	8	7.76	2.63	39	2	13	19.5	B	IVF	4	0	2	0	2	2	0	否	是	移植	未妊娠
362	0	C00003435	邱发溪	≥35	37	3	刺激方案	1	265.909	＞10天	11	≤3000	2925	HCG	1	3	1	继发不孕	1.3	≤24	22.2	不明原因	7	2.94	1800	1.68	7	7.76	2.63	39	2	13	11	B	IVF	4	0	2	0	0	0	0	否	否	全胚冷冻
410	0	2017120152	张亚楠	＜35	24	1	降调节方案	3	225	≤10天	9	≤3000	2025	HCG	3	1	0	继发不孕	3.59	＞24	33.2	女方因素	7	0.61	1232	0.27	7	6.92	2.63	32.76	1	14	10	A	IVF	4	0	3	2	2	2	0	否	是	移植	已妊娠	临床妊娠	宫内妊娠	单胎宫内妊娠
1228	0	2018040121	邱发溪	≥35	36	2	降调节方案	3	262.5	≤10天	10	≤3000	2625	HCG	1	3	1	继发不孕	2.1	≤24	22.2	不明原因	3	0.18	971	0.65	1	7.76	2.63	29	2	13	16.3	B	IVF	1	0	1	0	0	0	0	否	否	全胚冷冻
899	1	C00019217	张玉	＜35	34	2	降调节方案	3	372.727	＞10天	11	＞3000	4100	HCG	5	2	0	继发不孕	1.26	≤24	22.8	女方因素	5	1.69	1049.33	0.92	6	6.5	2.64	27.05	1	13	1.39	A	IVF	4	0	2	1	2	2	0	否	是	移植	未妊娠
1797	1	C00017430	王连琼	≥35	38	1	拮抗剂方案	2	300	≤10天	7	≤3000	2100	HCG	2	3	0	继发不孕	1.2	≤24	18.4	女方因素	2	27.3	545	0.6	2	5.9	2.64	41.75	2	7	9.5	A-B	IVF	2	0	2	0	2	2	0	否	是	移植	未妊娠
65	0	2018050121	田安红	＜35	31	1	降调节方案	3	230.769	＞10天	13	≤3000	3000	HCG	1	2	0	继发不孕	3.03	≤24	23.7	女方因素	9	1.01	2618	0.89	8	5.78	2.65	31.76	1	14	10.7	A	IVF	2	0	2	0	2	2	0	否	是	移植	已妊娠	临床妊娠	宫内妊娠	双胎宫内妊娠
172	0	C00015663	李春彦	≥35	40	2	拮抗剂方案	2	225	≤10天	10	≤3000	2250	HCG	2	4	0	继发不孕	1.67	＞24	24.6	女方因素	8	4.29	2410	1.88	4	6.63	2.65	72	2	12	0.55		IVF	2	0	0	0	0	0	0	是		无可移植胚胎
249	0	2016060130	王凤英	＜35	30	1	降调节方案	3	206.25	＞10天	16	＞3000	3300	HCG	1	2	0	继发不孕	2.5	≤24	24	女方因素	7	0.63	1833	0.41	7	6.07	2.65	36.43	1	32	12.5	B	IVF	4	0	3	1	2	2	0	否	是	移植	已妊娠	临床妊娠	宫内妊娠	双胎宫内妊娠
281	1	2017040159	郭玲春	≥35	38	1	刺激方案	1	300	＞10天	11	＞3000	3300	HCG	7	0	0	原发不孕	2.72	＞24	29.4	女方因素	7	2.38	2098	1.3	9	7.35	2.65	43	2	12	13	A	IVF	2	0	2	0	2	2	0	否	是	移植	已妊娠	临床妊娠	宫内妊娠	单胎宫内妊娠
343	1	2016110028	田辉	≥35	36	2	降调节方案	3	431.25	＞10天	16	＞3000	6900	HCG	7	0	0	原发不孕	2.88	＞24	29.4	女方因素	7	0.95	1876	0.97	9	9.45	2.65	49.09	2	12	10.2	B	IVF	5	0	1	0	1	1	0	否	是	移植	已妊娠	临床妊娠	宫内妊娠	单胎宫内妊娠
646	0	2018010153	孙灵仙	≥35	42	1	降调节方案	3	200	＞10天	11	≤3000	2200	HCG	1	3	1	继发不孕	1.87	＞24	24.4	女方因素	6	2.48	1558	0.64	7	10.47	2.65	31	2	9	12.5	A-B	IVF	6	0	6	2	2	2	0	否	是	移植	未妊娠
802	1	C00012382	李春彦	≥35	40	1	刺激方案	1	450	≤10天	10	＞3000	4500	HCG	2	4	0	继发不孕	1.58	＞24	24.6	女方因素	5	3.33	1619	0.76	7	6.63	2.65	72	2	12	0.51	B	IVF	2	0	1	0	1	1	0	否	是	移植	未妊娠
1099	1	2017050084	张华倩	≥35	39	1	降调节方案	3	353.571	≤10天	7	≤3000	2475	HCG	2	3	1	继发不孕	1.46	≤24	22.1	混合因素	4	4.57	1447	0.47	4	8.67	2.65	51.38	2	6	11.6	A	ICSI	1	0	1	0	1	1	0	否	是	移植	未妊娠
346	1	2017100212	张三云	≥35	42	1	降调节方案	3	300	＞10天	11	＞3000	3300	HCG	1	0	0	原发不孕	2.18	＞24	25.2	男方因素	7	2.47	1872	0.42	6	10	2.66	69	2	18	16.9	A	ICSI	4	0	3	0	2	2	0	否	是	移植	未妊娠
622	1	2017020149	蔡琳	≥35	40	1	降调节方案	3	383.333	≤10天	9	＞3000	3450	HCG	1	1	0	继发不孕	1.6	＞24	26	混合因素	6	2.21	1276	2.14	8	3.23	2.66	66.06	2	14	11.7		ICSI	3	0	4	0	2	2	0	否	是	移植	未妊娠
1251	1	C00004774	张三云	≥35	43	2	拮抗剂方案	2	425	≤10天	7	≤3000	2975	HCG	1	0	0	原发不孕	1.48	＞24	25.2	男方因素	3	2.14	907	0.37	4	10	2.66	69	2	11	14.6	A-B	ICSI	3	0	2	1	2	2	0	否	是	移植	已妊娠	临床妊娠	宫内妊娠	单胎宫内妊娠
2134	0	2016040132	黄理翠	＜35	31	1	刺激方案	1	225	≤10天	9	≤3000	2025	HCG	2	2	0	继发不孕	2.35	＞24	27.3	女方因素	1	2.11	397	0.78	0	7.28	2.66	36.43	1	8	10.8	A		0	0	0	0	0	0	0	是		未取到卵
251	0	C00003548	马媛	＜35	31	3	降调节方案	3	165	≤10天	10	≤3000	1650	HCG	5	1	0	原发不孕	2.67	≤24	22.5	女方因素	7	0.34	1742	0.5	8	7.35	2.67	40	1	12	9.6	A	IVF	2	0	1	0	1	1	0	否	是	移植	已妊娠	临床妊娠	宫内妊娠	单胚胎停
376	0	2016100196	潘燕红	≥35	37	1	降调节方案	3	238.636	＞10天	11	≤3000	2625	HCG	13	0	0	原发不孕	1.662	≤24	20.2	男方因素	7	0.6	1610	0.55	6	3.39	2.67	50	2	11	9.3	A	ICSI	4	0	3	2	2	2	0	否	是	移植	未妊娠
414	0	C00007667	郑成霞	≥35	40	1	降调节方案	3	216.667	≤10天	9	≤3000	1950	HCG	5	2	1	继发不孕	2.54	＞24	25.4	男方因素	7	0.66	1181	0.75	7	7.1	2.67	47	2	16	0.95	A	ICSI	4	0	2	0	2	2	0	否	是	移植	已妊娠	临床妊娠	宫内妊娠	双胎宫内妊娠
160	0	C00013146	张文秀	＜35	33	1	刺激方案	1	233.333	≤10天	9	≤3000	2100	HCG	5	0	0	原发不孕	3.06	≤24	21.3	女方因素	6	0.55	1975	0.54	7	10.16	2.68	41	1	9	9.3	A	IVF	6	0	5	3	2	2	0	否	是	移植	已妊娠	临床妊娠	宫外妊娠	异位妊娠
425	0	2017100068	王晶	＜35	29	1	降调节方案	3	143.182	＞10天	11	≤3000	1575	HCG	3	0	0	原发不孕	3.44	≤24	23.4	女方因素	7	0.95	1010	1.7	7	6.34	2.68	31	1	16	15.7	A-B	IVF	3	0	2	0	0	0	0	否	否	全胚冷冻
610	0	C00013038	周萍	≥35	39	1	降调节方案	3	265.909	＞10天	11	≤3000	2925	HCG	3	2	1	继发不孕	1.91	＞24	26	女方因素	6	1.94	1414	1.35	5	6.73	2.68	50	2	9	1.46	A	IVF	4	0	2	1	0	0	0	否	否	全胚冷冻
714	1	2017060146	付春红	＜35	34	1	降调节方案	3	353.571	＞10天	14	＞3000	4950	HCG	3	0	0	原发不孕	1.95	≤24	22	混合因素	5	1.06	1619	0.68	5	10.37	2.68	42	1	7	11.5	B	ICSI	5	0	2	0	0	0	0	否	否	全胚冷冻
429	1	2017110281	于静	≥35	36	3	拮抗剂方案	2	312.5	≤10天	8	≤3000	2500	HCG	2	0	0	原发不孕	1.9	≤24	23.6	混合因素	6	5.47	931	0.7	6	8.93	2.69	41.75	2	10	11.3	A	ICSI	4	0	1	0	0	0	0	否	否	全胚冷冻
1619	1	2016110084	于静	≥35	35	1	降调节方案	3	425	≤10天	9	＞3000	3825	HCG	1	0	0	原发不孕	2.08	≤24	23.6	混合因素	2	9.43	951	0.44	4	8.93	2.69	41.75	2	10	11.5	A	ICSI	3	0	0	0	0	0	0	是		无可移植胚胎
465	0	2017110007	赵传菊	＜35	33	1	降调节方案	3	237.5	＞10天	12	≤3000	2850	HCG	3	1	0	继发不孕	2.10	＞24	24.8	女方因素	6	1.43	1848	1.24	5	7.25	2.7	27.8	1	10	12	A	IVF	3	0	3	0	2	2	0	否	是	移植	已妊娠	临床妊娠	宫内妊娠	单胚胎停
404	0	C00009306	李梅梅	≥35	36	1	降调节方案	3	275	＞10天	12	＞3000	3300	HCG	1	1	0	继发不孕	2.99	＞24	28.8	女方因素	7	1.38	1278	1.14	6	7.18	2.71	25	2	13	1.42	A	IVF	3	0	2	0	2	2	0	否	是	移植	未妊娠
851	1	C00011171	李梅梅	≥35	37	2	刺激方案	1	421.875	≤10天	8	＞3000	3375	HCG	1	1	0	继发不孕	1.88	＞24	28.8	女方因素	5	4.47	1300	1.18	7	7.18	2.71	25	2	11	0.92	B	IVF	4	0	4	1	0	0	0	否	否	全胚冷冻
968	1	2018010194	魏倩倩	＜35	31	1	刺激方案	1	337.5	＞10天	12	＞3000	4050	HCG	3	1	1	继发不孕	2.21	≤24	19.1	男方因素	4	2.25	1390	0.67	6	8.84	2.71	70.1	1	12	6.2	A-B	ICSI	2	0	1	1	0	0	0	否	否	全胚冷冻
1188	0	C00003713	徐延雁	≥35	36	2	刺激方案	1	225	≤10天	7	≤3000	1575	HCG	6	0	0	原发不孕	1.6	＞24	31.2	女方因素	4	2.9	1109	0.39	4	4.77	2.72	39.09	2	7	14.9	A-B	IVF	4	0	0	0	0	0	0	是		无可移植胚胎
1349	1	2017120188	姜洪艳	≥35	35	1	刺激方案	1	300	≤10天	8	≤3000	2400	HCG	6	0	0	原发不孕	1.42	≤24	22.3	不明原因	3	10.2	592	1.12	4	7.53	2.72	65.76	2	6	5.5	B	IVF	1	0	2	0	0	0	0	否	否	全胚冷冻
2089	0	2018050044	徐延雁	≥35	36	1	降调节方案	3	218.182	＞10天	11	≤3000	2400	HCG	6	0	0	原发不孕	1.65	＞24	31.2	女方因素	1	5.5	494	0.18	1	4.77	2.72	59.09	2	7	12.5	A-B	IVF	1	0	0	0	0	0	0	是		无可移植胚胎
236	0	2018040084	张瑛	＜35	34	1	降调节方案	3	234.615	＞10天	13	＞3000	3050	HCG	1	0	0	原发不孕	2.0	＞24	26.6	不明原因	8	1.18	1184	0.58	9	8.02	2.73	55.05	1	18	11.2		IVF	6	0	2	1	2	2	0	否	是	移植	已妊娠	临床妊娠	宫内妊娠	单胎宫内妊娠
627	0	C00016882	马瑛骏	＜35	32	1	拮抗剂方案	2	200	≤10天	7	≤3000	1400	HCG	4	0	0	原发不孕	1.9	≤24	22.6	女方因素	6	0.58	1157	0.77	7	6.19	2.73	34	1	25	15.3	A	IVF	3	2	3	0	1	1	0	否	是	移植	已妊娠	临床妊娠	宫内妊娠	单胎宫内妊娠
823	0	2016120180	李国英	≥35	38	1	降调节方案	3	150	≤10天	10	≤3000	1500	HCG	3	0	0	继发不孕	2.32	≤24	22	女方因素	5	0.64	1470	1.53	7	8.25	2.73	29.09	2	13	8.7	B	IVF	3	0	3	1	2	2	0	否	是	移植	未妊娠
1147	1	2016050269	李玉新	≥35	43	1	刺激方案	1	300	≤10天	9	≤3000	2700	HCG	5	3	1	继发不孕	4.49	＞24	34.2	女方因素	4	3.36	1290	0.3	5	6.97	2.73	76.43	2	6	9.2	A	IVF	2	0	2	0	2	2	0	否	是	移植	未妊娠
1589	1	C00012278	陈虹羽	≥35	39	1	刺激方案	1	300	≤10天	9	≤3000	2700	HCG	2	2	0	继发不孕	1.84	≤24	21.5	女方因素	3	2.78	1027	1.56	3	6.42	2.73	85	2	5	0.65	B	IVF	3	0	2	0	0	0	0	否	否	全胚冷冻
297	0	2018060204	庄会妹	＜35	30	3	刺激方案	1	225	≤10天	7	≤3000	1575	HCG	3	0	0	原发不孕	2.24	＞24	24.4	男方因素	7	6.92	2693	1.31	5	7.15	2.74	99.86	1	16	7.2	A	ICSI	4	0	0	0	0	0	0	是		无可移植胚胎
448	1	C00016733	孔宪玲	≥35	39	4	刺激方案	1	300	≤10天	9	≤3000	2700	HCG	2	1	1	继发不孕	1.80	≤24	23.5	混合因素	6	7.7	1800	1.25	5	9.57	2.74	54	2	10	4.3	B	ICSI	2	0	1	0	0	0	0	否	否	全胚冷冻
587	1	C00019022	王姝	≥35	38	1	拮抗剂方案	2	362.5	≤10天	8	≤3000	2900	HCG	2	2	0	继发不孕	1.29	＞24	24.5	女方因素	6	2.26	1594.82	1.42	7	6.08	2.76	40.2	2	10	7.5	A	IVF	7	0	3	1	1	1	0	否	是	移植	未妊娠
617	1	C00016186	刘文茹	＜35	28	4	刺激方案	1	300	≤10天	6	≤3000	1800	HCG	2	0	0	原发不孕	1.82	＞24	26.7	女方因素	6	7.53	1322	0.76	4	7.58	2.76	27	1	10	0.9	B-	IVF	4	0	2	0	0	0	0	否	否	全胚冷冻
751	0	C00011989	刘文茹	＜35	27	2	刺激方案	1	225	≤10天	7	≤3000	1575	HCG	2	0	0	原发不孕	1.41	＞24	26.7	女方因素	5	6.36	1398	0.78	3	7.58	2.76	27	1	10	1.1	B-C	IVF	3	0	2	0	0	0	0	否	否	全胚冷冻
1719	1	C00011039	刘文茹	＜35	26	1	刺激方案	1	450	≤10天	8	＞3000	3600	HCG	2	0	0	原发不孕	2.24	＞24	26.7	女方因素	2	9.17	714	0.54	1	7.58	2.76	27	1	10	8	B	IVF	0	0	0	0	0	0	0	是		无可移植胚胎
46	1	2017100031	初文静	≥35	36	1	降调节方案	3	298.077	＞10天	13	＞3000	3875	HCG	1	0	0	原发不孕	3.19	≤24	20.4	女方因素	9	0.74	2057	0.96	7	6.59	2.77	66.43	2	15	12	A	IVF	6	0	2	1	2	2	0	否	是	移植	未妊娠
50	1	2018070041	韩丽	≥35	36	2	刺激方案	1	450	＞10天	12	＞3000	5400	HCG	4	1	1	继发不孕	1.47	＞24	27.9	女方因素	9	3.79	2021	1.42	8	13.42	2.78	17	2	15			IVF	6	0	2	1	0	0	0	否	否	全胚冷冻
591	1	C00010660	张春梅	≥35	41	1	刺激方案	1	450	＞10天	12	＞3000	5400	HCG	3	2	1	继发不孕	1.26	≤24	23.4	女方因素	6	5.39	2207	2.18	7	11	2.78	43	2	9	0.7	A	IVF	7	0	6	3	0	0	0	否	否	全胚冷冻
836	0	C00011659	张萍	＜35	28	1	拮抗剂方案	2	150	≤10天	7	≤3000	1050	HCG	3	0	0	原发不孕	2.46	≤24	23.5	女方因素	5	2.7	1405	0.54	6	7.18	2.78	26.8	1	12	1.07	A	IVF	4	0	4	1	2	2	0	否	是	移植	已妊娠	临床妊娠	宫内妊娠	单胎宫内妊娠
845	1	2017100030	韩丽	＜35	34	1	降调节方案	3	339.706	＞10天	17	＞3000	5775	HCG	3	1	1	继发不孕	4.24	＞24	27.9	女方因素	5	1.76	1359	0.86	6	13.42	2.78	17	1	10	10	A	IVF	5	0	1	0	0	0	0	否	否	全胚冷冻
1984	0	C00010793	邱文	≥35	41	3	刺激方案	1	225	≤10天	9	≤3000	2025	HCG	3	5	1	继发不孕	1.8	＞24	28.7	女方因素	2	13.69	404	0.63	1	7.83	2.78	33	2	8	7.3	B	IVF	0	0	1	0	0	0	0	否	否	全胚冷冻
207	0	2017060101	王玉	＜35	32	1	降调节方案	3	150	≤10天	8	≤3000	1200	HCG	4	0	0	原发不孕	4.27	＞24	30	女方因素	8	5.44	1846	1.2	8	3.91	2.79	43	1	12	10.6	A	IVF	4	0	4	3	2	2	0	否	是	移植	已妊娠	临床妊娠	宫内妊娠	双胎宫内妊娠
462	0	2017030245	刘春红	≥35	35	1	降调节方案	3	225	＞10天	11	≤3000	2475	HCG	1	0	0	原发不孕	2.02	＞24	24.5	女方因素	6	8.13	1648	1.65	7	8.9	2.79	26	2	12	11	A-B	IVF	0	0	0	0	0	0	0	是		无可移植胚胎
1160	0	2017030208	田艳	≥35	38	1	降调节方案	3	273.214	＞10天	14	＞3000	3825	HCG	2	0	0	原发不孕	2.52	≤24	22.1	混合因素	4	1.08	1228	0.42	7	6.32	2.79	56	2	11	9.2	A	ICSI	4	0	2	0	2	2	0	否	是	移植	未妊娠
4	0	2017070199	王娟	＜35	32	1	刺激方案	1	272.727	＞10天	11	≤3000	3000	HCG	3	0	0	原发不孕	2.98	＞24	29.4	女方因素	10	5.28	2420	1.76	7	8.03	2.8	11	1	10	8.5	B	IVF	6	0	2	1	0	0	0	否	否	全胚冷冻
63	0	2016090059	王丽	＜35	30	1	降调节方案	3	232.5	≤10天	10	≤3000	2325	HCG	3	0	0	原发不孕	2.92	≤24	24	女方因素	9	2.55	2640	2.86	5	7.05	2.8	43	1	15	2.8		IVF	3	0	2	0	0	0	0	否	否	全胚冷冻
202	1	C00012294	张燕	≥35	40	1	拮抗剂方案	2	375	≤10天	8	≤3000	3000	HCG	4	4	2	继发不孕	1.41	≤24	23.4	女方因素	8	2.71	1903	0.76	8	7.05	2.8	43	2	15	1.02	A	IVF	5	0	4	1	0	0	0	否	否	全胚冷冻
2180	0	C00005438	孔娟	≥35	38	1	刺激方案	1	150	≤10天	5	≤3000	750	HCG	1	2	0	继发不孕	2.26	≤24	22	女方因素	1	4.69	306	0.24	1	8.4	2.8	35	2	6	7.9	A-B	IVF	0	1	1	0	0	0	0	否	否	全胚冷冻
315	0	2017070189	孔秀荣	≥35	42	1	降调节方案	3	219.231	＞10天	13	≤3000	2850	HCG	2	3	1	继发不孕	1.53	＞24	25.4	女方因素	7	1.44	2227	0.55	6	8.86	2.81	44	2	8	13.1	B	IVF	4	0	2	1	2	2	0	否	是	移植	已妊娠	临床妊娠	宫内妊娠	单胎宫内妊娠
679	0	C00010170	李雪娜	≥35	36	1	降调节方案	3	200	≤10天	9	≤3000	1800	HCG	5	0	0	原发不孕	1.96	＞24	25.3	女方因素	5	1.51	1817	0.91	7	7.18	2.81	40	2	11	8.1		IVF	5	0	2	0	2	2	0	否	是	移植	未妊娠
834	0	2016060067	马艺珲	＜35	31	1	刺激方案	1	201.923	＞10天	13	≤3000	2625	HCG	3	0	0	原发不孕	1.89	＞24	26.6	不明原因	5	1.94	1418	1.26	4	9.95	2.82	45.42	1	9	12.1	B	IVF	2	0	2	0	2	2	0	否	是	移植	已妊娠	临床妊娠	宫内妊娠	双胎宫内妊娠
919	0	C00009941	潘玉阁	＜35	28	1	降调节方案	3	173.077	＞10天	13	≤3000	2250	HCG	3	0	0	原发不孕	3.25	＞24	25.7	女方因素	4	1.73	948	1.37	6	7.88	2.82	45	1	36	11	A	IVF	2	0	2	1	2	2	0	否	是	移植	未妊娠
1157	1	2016060063	邹燕	＜35	29	1	刺激方案	1	380	＞10天	15	＞3000	5700	HCG	1	2	0	继发不孕	2.27	＞24	24.8	女方因素	4	1.62	1234	0.84	6	8.57	2.82	62.39	1	11	10.5	A	IVF	5	0	2	0	0	0	0	否	否	全胚冷冻
1268	0	C00016913	胡延南	＜35	32	1	拮抗剂方案	2	225	≤10天	6	≤3000	1350	HCG	2	2	0	继发不孕	2.93	≤24	23.3	男方因素	3	2.92	876	0.51	4	9.71	2.82	79	1	7	8.7	A-B	ICSI	2	0	0	0	0	0	0	是		无可移植胚胎
469	1	2017060252	武珺	≥35	37	1	降调节方案	3	300	＞10天	12	＞3000	3600	HCG	9	3	1	继发不孕	2.27	≤24	22.6	女方因素	6	6.57	1824	0.84	6	5.07	2.83	30.1	2	14	13.4	A	IVF	4	0	4	1	0	0	0	否	否	全胚冷冻
544	1	C00008903	宫晓丽	＜35	30	2	降调节方案	3	375	＞10天	13	＞3000	4875	HCG	1	2	0	继发不孕	2.47	≤24	21.8	女方因素	6	2.47	1998	0.34	6	13.64	2.83	37	1	9	8.7	A-B	IVF	4	0	4	2	0	0	0	否	否	全胚冷冻
89	0	C00007399	于春梅	≥35	36	1	降调节方案	3	212.5	＞10天	12	≤3000	2550	HCG	7	2	0	继发不孕	2.37	＞24	44	男方因素	9	1.1	2082	0.13	8	6.83	2.84	19	2	44	11	A-B	IVF	4	0	4	2	2	2	0	否	是	移植	已妊娠	临床妊娠	宫内妊娠	单胚胎停
370	0	2017040148	牛青	＜35	25	1	降调节方案	3	218.75	＞10天	12	≤3000	2625	HCG	2	2	2	继发不孕	2.91	＞24	31.2	女方因素	9	1.12	1834	1.34	8	8.01	2.85	36.43	1	18	15.2	A	IVF	8	0	6	3	2	2	0	否	是	移植	已妊娠	临床妊娠	宫内妊娠	单胎宫内妊娠
198	1	2018060249	张文	≥35	37	1	刺激方案	1	352.5	≤10天	10	＞3000	3525	HCG	3	1	1	继发不孕	3.62	＞24	25.4	女方因素	8	7	1985	1.9	8	7.94	2.86	86.43	2	11	4.7	B	IVF	4	0	3	1	0	0	0	否	否	全胚冷冻
1749	0	2018010009	何卫青	≥35	39	1	拮抗剂方案	2	225	≤10天	6	≤3000	1350	HCG	1	2	1	继发不孕	1.94	＞24	30.9	女方因素	2	1.95	632	0.38	4	4.35	2.86	41	2	9	8.8	A	IVF	2	0	2	1	2	2	0	否	是	移植	已妊娠	临床妊娠	宫内妊娠	单胎宫内妊娠
1951	1	C00015957	厉艳艳	≥35	40	1	刺激方案	1	300	≤10天	8	≤3000	2400	HCG	5	1	1	继发不孕	1.5	＞24	24.8	女方因素	2	5.9	806	0.62	4	4.8	2.86	16	2	9	0.81	B	IVF	2	0	1	1	0	0	0	否	否	全胚冷冻
273	1	C00011557	乔锰	≥35	40	1	刺激方案	1	300	≤10天	9	≤3000	2700	HCG	4	2	1	继发不孕	1.44	≤24	23.9	女方因素	7	13.92	2170	0.75	6	6.9	2.87	46.84	2	11	0.69	B	IVF	3	0	4	0	0	0	0	否	否	全胚冷冻
537	1	C00009834	刘敏	＜35	28	3	刺激方案	1	450	≤10天	10	＞3000	4500	HCG	1	1	0	继发不孕	2.27	＞24	24.2	女方因素	6	6.88	2049	1.28	5	4.02	2.87	43.67	1	10	5.1	A-B	IVF	5	0	3	0	0	0	0	否	否	全胚冷冻
637	1	2018050183	刘敏	＜35	26	1	刺激方案	1	375	≤10天	7	≤3000	2625	HCG	1	0	0	原发不孕	3.86	＞24	24.2	女方因素	6	4.85	1268	0.65	5	4.02	2.87	34.78	1	14			IVF	2	0	2	0	0	0	0	否	否	全胚冷冻
651	0	2018020028	孙阳阳	≥35	36	1	降调节方案	3	286.364	＞10天	11	＞3000	3150	HCG	1	1	0	原发不孕	2.48	≤24	23.9	女方因素	5	0.61	1760	0.24	5	8.3	2.87	43.77	2	13	10	A	IVF	3	0	2	0	2	2	0	否	是	移植	已妊娠	临床妊娠	宫内妊娠	单胎宫内妊娠
998	1	2017050130	徐友芳	＜35	34	1	刺激方案	1	319.737	＞10天	19	＞3000	6075	HCG	2	3	1	继发不孕	1.56	≤24	21.4	女方因素	4	2.16	1294	1.02	4	5.97	2.87	59.09	1	6	8.3	A	IVF	2	0	2	0	2	2	0	否	是	移植	已妊娠	生化妊娠	生化妊娠	生化妊娠
1011	0	2017090271	徐友芳	≥35	35	2	刺激方案	1	150	≤10天	9	≤3000	1350	HCG	2	3	1	继发不孕	1.73	≤24	21.4	女方因素	4	25.16	1230	1.23	5	5.97	2.87	49.09	2	6	6	A	IVF	2	0	2	0	0	0	0	否	否	全胚冷冻
1111	1	C00008130	刘敏	＜35	28	2	刺激方案	1	375	≤10天	9	＞3000	3375	HCG	1	1	0	继发不孕	1.59	＞24	24.2	女方因素	4	8.2	1405	0.28	3	4.02	2.87	34.04	1	10	4.1	A	IVF	2	0	2	0	0	0	0	否	否	全胚冷冻
355	0	2017020110	石清	＜35	26	1	降调节方案	3	250	＞10天	14	＞3000	3500	HCG	2	2	1	继发不孕	1.634	＞24	24.4	女方因素	7	2.28	1826	1.16	8	3.62	2.88	68	1	11	6.2	B	IVF	5	0	4	1	0	0	0	否	否	全胚冷冻
1177	0	C00018791	张红雷	＜35	31	1	拮抗剂方案	2	225	＞10天	11	≤3000	2475	HCG	1	2	0	继发不孕	2.18	＞24	25.5	女方因素	4	5.29	1147.22	1.21	4	8.75	2.88	49	1	8	1.14	B	IVF	4	0	4	4	1	1	0	否	是	移植	未妊娠
1603	1	C00016603	刘雪娇	≥35	36	1	刺激方案	1	300	≤10天	9	≤3000	2700	HCG	6	0	0	原发不孕	1.67	≤24	18.4	女方因素	2	13.57	997.65	1.35	2	6.82	2.88	73	2	7	6.8	A-B	IVF	0	0	0	0	0	0	0	是		无可移植胚胎
126	1	2016060275	潘芹	≥35	40	1	降调节方案	3	413.636	＞10天	11	＞3000	4550	HCG	1	5	0	原发不孕	1.56	＞24	29	女方因素	8	0.15	1962	1.31	6	9.55	2.89	46	2	8	7.2	A	IVF	4	0	2	0	2	2	0	否	是	移植	未妊娠
789	1	2017050217	潘芹	≥35	41	2	降调节方案	3	416.667	≤10天	9	＞3000	3750	HCG	1	5	0	继发不孕	1.69	＞24	29	女方因素	5	0.93	1684	0.48	6	9.55	2.89	46	2	8	6.3	A	IVF	3	0	1	0	0	0	0	否	否	全胚冷冻
153	1	2016110135	杨英	＜35	32	1	降调节方案	3	315	≤10天	10	＞3000	3150	HCG	5	0	0	原发不孕	3.18	＞24	35.1	混合因素	8	4.91	1895	1.11	6	7.9	2.9	40.37	1	13	11.2	A	ICSI	4	0	2	2	2	2	0	否	是	移植	未妊娠
531	0	2016060151	耿洁	≥35	41	3	刺激方案	1	285	≤10天	10	≤3000	2850	HCG	8	1	0	继发不孕	1.7	＞24	28.1	女方因素	6	5.25	2117	1.1	4	9.32	2.9	25	2	9	5.3	B	IVF	4	0	2	0	0	0	0	否	否	全胚冷冻
648	1	2016070217	刘玉玲	≥35	38	1	刺激方案	1	323.077	＞10天	13	＞3000	4200	HCG	2	2	1	继发不孕	2.48	＞24	24.7	混合因素	5	0.54	860	1.08	4	12.9	2.9	40.37	2	8	12	A	ICSI	2	0	2	0	2	2	0	否	是	移植	未妊娠
771	1	C00006146	吴桂杰	≥35	41	1	拮抗剂方案	2	350	＞10天	12	＞3000	4200	双扳机	3	1	1	继发不孕	1.38	≤24	24	女方因素	5	2.12	1800	2.11	6	5.42	2.9	56	2	13	13.7	A	IVF	4	0	4	2	0	0	0	否	否	全胚冷冻
1077	1	2017050005	耿洁	≥35	42	6	刺激方案	1	325	≤10天	7	≤3000	2275	HCG	8	1	0	继发不孕	1.95	＞24	28.1	男方因素	4	6.66	1561	0.62	2	9.32	2.9	25	2	9	4.7	A-B	ICSI	1	0	1	0	0	0	0	否	否	全胚冷冻
1234	0	2017020062	刘玉玲	≥35	38	2	降调节方案	3	254.167	＞10天	12	＞3000	3050	HCG	2	2	1	继发不孕	1.40	＞24	24.7	混合因素	3	2.28	959	0.48	4	12.9	2.9	40.37	2	8	14	A	ICSI	4	0	2	0	2	2	0	否	是	移植	未妊娠
1451	0	2017070188	刘玉玲	≥35	39	3	刺激方案	1	225	≤10天	9	≤3000	2025	HCG	2	2	1	继发不孕	1.32	＞24	24.7	混合因素	3	8.6	903	0.58	3	12.9	2.9	40.37	2	7	6.2	A-B	ICSI	3	0	2	0	0	0	0	否	否	全胚冷冻
1526	1	2016120202	耿洁	≥35	41	5	降调节方案	3	325	＞10天	12	＞3000	3900	HCG	8	1	0	继发不孕	1.7	＞24	28.1	女方因素	3	3.7	805	0.68	3	9.32	2.9	25	2	9	8.8	A	IVF	3	0	0	0	0	0	0	是		无可移植胚胎
1641	1	C00012123	严春玲	＜35	34	1	降调节方案	3	316.667	≤10天	6	≤3000	1900	HCG	6	0	0	原发不孕	1.46	≤24	20	女方因素	2	3.84	888	0.78	3	7.9	2.9	40.37	1	10	1.22		IVF	3	0	2	0	2	2	0	否	是	移植	已妊娠	临床妊娠	宫内妊娠	单胎宫内妊娠
1976	0	2016030189	耿洁	≥35	41	1	刺激方案	1	217.5	≤10天	10	≤3000	2175	双扳机	8	1	0	继发不孕	2.42	＞24	28.1	女方因素	2	7.92	435	0.69	4	9.32	2.9	25	2	9	5.8	A	IVF	3	0	1	0	0	0	0	否	否	全胚冷冻
580	1	2016070065	孙合春	≥35	37	3	刺激方案	1	300	＞10天	15	＞3000	4500	HCG	12	0	0	原发不孕	2.04	＞24	29	混合因素	6	0.6	1636	0.5	8	7.34	2.92	69.73	2	8	8.7	A	ICSI	4	0	2	0	0	0	0	否	否	全胚冷冻
688	0	2016030173	段续凤	＜35	26	2	降调节方案	3	279.167	＞10天	12	＞3000	3350	HCG	3	0	0	原发不孕	3.66	≤24	21.7	男方因素	5	1.65	1777	0.96	8	7.46	2.92	31	1	16	11.9	A	ICSI	0	0	0	0	0	0	0	是		无可移植胚胎
797	1	C00012359	董慧敏	＜35	33	2	刺激方案	1	300	≤10天	7	≤3000	2100	HCG	4	2	0	继发不孕	1.44	≤24	20.8	女方因素	5	13.26	1645	1.14	7	6.77	2.92	91.75	1	10	0.67	A	IVF	3	0	2	1	0	0	0	否	否	全胚冷冻
1178	1	C00011469	董慧敏	＜35	33	1	拮抗剂方案	2	291.667	≤10天	9	≤3000	2625	HCG	4	2	0	继发不孕	2.81	≤24	20.8	女方因素	4	4.41	1143	0.72	5	6.77	2.92	52	1	11	10	A	IVF	2	0	0	0	0	0	0	是		无可移植胚胎
1259	0	C00018917	蔡秀群	≥35	39	2	拮抗剂方案	2	231.818	＞10天	11	≤3000	2550	HCG	1	2	2	继发不孕	1.41	＞24	25.6	女方因素	3	1.79	891.83	0.54	3	6.99	2.92	33	2	12	12	A	IVF	3	0	1	0	1	1	0	否	是	移植	未妊娠
1343	1	2016040153	孙合春	≥35	37	2	刺激方案	1	450	＞10天	12	＞3000	5400	HCG	12	0	0	原发不孕	4.49	≤24	20.1	混合因素	3	0.31	614	0.93	1	5.34	2.92	69.73	2	8	9	A-B	ICSI	1	0	1	1	0	0	0	否	否	全胚冷冻
977	0	2016110053	路娟	≥35	37	1	降调节方案	3	193.75	＞10天	12	≤3000	2325	HCG	13	2	0	继发不孕	1.620	＞24	24.9	女方因素	4	1.26	1361	1.31	7	9.25	2.93	65.42	2	18	11.7	A	IVF	1	0	0	0	0	0	0	是		无可移植胚胎
1340	0	2017080028	王夏	≥35	36	1	降调节方案	3	283.333	≤10天	9	≤3000	2550	HCG	2	0	0	原发不孕	1.48	≤24	22.1	女方因素	3	1.8	635	0.76	3	8.2	2.93	53.77	2	12	11.2	A	IVF	0	0	0	0	0	0	0	是		无可移植胚胎
586	0	C00016408	张怡	＜35	33	1	拮抗剂方案	2	200	≤10天	7	≤3000	1400	HCG	2	1	1	继发不孕	1.77	≤24	23.6	女方因素	6	2.67	1595	1.76	4	7.96	2.94	26.43	1	7	8.7	A	IVF	4	0	4	1	0	0	0	否	否	全胚冷冻
730	1	C00018879	商国荣	≥35	38	1	降调节方案	3	343.182	＞10天	11	＞3000	3775	HCG	4	0	0	原发不孕	2.35	≤24	18.8	女方因素	5	1.95	1505	1.06	4	10.63	2.94	41.76	2	8	12.4	A	IVF	2	0	1	0	1	1	0	否	是	移植	已妊娠	临床妊娠	宫内妊娠	单胚胎停
883	0	C00008583	韩培培	≥35	40	1	降调节方案	3	192.105	＞10天	19	＞3000	3650	HCG	1	2	1	继发不孕	1.99	≤24	24	男方因素	5	2.19	1116	0.14	5	6.19	2.94	18	2	14	1.73	A-B	ICSI	3	0	1	0	0	0	0	否	否	全胚冷冻
100	0	2018030231	张天天	＜35	27	1	降调节方案	3	212.5	＞10天	12	≤3000	2550	HCG	2	1	0	继发不孕	4.28	≤24	17.6	男方因素	9	0.5	1919	0.66	7	8.38	2.95	34.78	1	16	9.7	A-B	ICSI	3	0	2	0	2	2	0	否	是	移植	已妊娠	临床妊娠	宫内妊娠	单胎宫内妊娠
151	1	C00010160	屈倩倩	≥35	36	2	降调节方案	3	315.385	＞10天	13	＞3000	4100	HCG	6	0	0	原发不孕	2.14	＞24	26.4	女方因素	8	3.13	1955	1.58	6	5.38	2.96	52	2	13	10.5	A-B	IVF	5	0	2	0	0	0	0	否	否	全胚冷冻
1335	0	2017070048	曹瑞平	＜35	30	1	降调节方案	3	195	≤10天	10	≤3000	1950	HCG	2	0	0	继发不孕	1.25	≤24	20.5	女方因素	3	1.97	641	0.52	3	8.54	2.96	77	1	8	10.4	A	IVF	0	0	0	0	0	0	0	是		无可移植胚胎
86	1	2017030311	付林林	＜35	27	1	降调节方案	3	323.684	＞10天	19	＞3000	6150	HCG	1	3	0	继发不孕	3.86	＞24	32	男方因素	9	2.19	2122	0.54	9	5.03	2.97	30.1	1	18	10	A-B	ICSI	7	0	2	0	2	2	0	否	是	移植	已妊娠	临床妊娠	宫内妊娠	双胎宫内妊娠
908	1	C00018217	乔玺睿	≥35	37	1	降调节方案	3	294.231	＞10天	13	＞3000	3825	HCG	3	0	0	原发不孕	2.89	＞24	28.3	女方因素	4	2.89	973.26	1.07	5	6.29	2.97	23.07	2	14	11.3	A	IVF	3	0	2	0	2	2	0	否	是	移植	未妊娠
1436	1	2015120109	王文秀	≥35	41	1	刺激方案	1	300	≤10天	7	≤3000	2100	HCG	2	2	1	继发不孕	1.77	＞24	29.7	混合因素	3	4.28	934.88	0.39	3	9.67	2.97	31.76	2	7	6.5	A-B	ICSI	2	0	1	0	0	0	0	否	否	全胚冷冻
61	1	C00012639	翟亚男	≥35	41	4	刺激方案	1	465	≤10天	10	＞3000	4650	HCG	6	0	0	原发不孕	1.93	≤24	20.9	混合因素	9	1.22	2717	1.67	8	8.84	2.98	64	2	15	1.2	A-B	ICSI	3	0	1	0	0	0	0	否	否	全胚冷冻
882	1	C00017395	宋欣香	≥35	39	1	降调节方案	3	347.222	≤10天	9	＞3000	3125	HCG	1	1	0	继发不孕	2.66	＞24	25.4	女方因素	5	2.69	1126	1.16	5	5.85	2.98	17	2	13	12.6	A	IVF	4	0	1	0	1	1	0	否	是	移植	未妊娠
959	1	C00011069	翟亚男	≥35	41	3	刺激方案	1	300	≤10天	10	≤3000	3000	HCG	6	0	0	原发不孕	2.66	≤24	20.9	混合因素	4	12.67	501	3.63	3	8.84	2.98	64	2	10	0.6	A-B	ICSI	2	0	1	0	0	0	0	否	否	全胚冷冻
1008	1	C00009736	翟亚男	≥35	40	2	刺激方案	1	300	≤10天	8	≤3000	2400	HCG	6	0	0	原发不孕	1.22	≤24	20.9	女方因素	4	11.79	1239	2.31	2	8.84	2.98	64	2	8	0.69	A-B	IVF	0	0	0	0	0	0	0	是		无可移植胚胎
1196	0	2016110014	王帆	＜35	31	1	刺激方案	1	225	≤10天	7	≤3000	1575	HCG	6	1	1	继发不孕	2.94	＞24	25.7	女方因素	4	10.13	1062	0.73	4	9.45	2.98	77	1	9	17.6	B	IVF	4	0	2	0	0	0	0	否	否	全胚冷冻
1272	1	C00018471	宋欣香	≥35	39	2	拮抗剂方案	2	350	≤10天	7	≤3000	2450	HCG	1	1	0	继发不孕	1.427	＞24	25.4	女方因素	3	4.09	866.61	1.43	2	5.85	2.98	17	2	13	14.5	2401	IVF	0	0	1	0	0	0	0	否	否	全胚冷冻
1348	1	2017090224	王帆	＜35	31	2	刺激方案	1	405	≤10天	5	≤3000	2025	HCG	6	1	1	继发不孕	2.47	＞24	25.7	女方因素	3	7.33	598	0.65	5	9.45	2.98	56	1	9	4.1	B	IVF	3	0	2	0	0	0	0	否	否	全胚冷冻
772	0	C00011940	陈飞	≥35	35	1	拮抗剂方案	2	225	≤10天	8	≤3000	1800	HCG	6	0	0	原发不孕	2.49	≤24	18.3	女方因素	5	2.6	1796	0.82	6	9.89	2.99	76	2	10	1.3	A	IVF	5	0	4	0	2	2	0	否	是	移植	未妊娠
1060	1	2018070105	吕倩倩	＜35	34	2	刺激方案	1	375	≤10天	9	＞3000	3375	HCG	6	1	1	继发不孕	1.23	＞24	29.6	混合因素	4	9.49	1648	0.8	5	6.75	2.99	86.43	1	9	7.4	A-B	ICSI	2	0	2	2	0	0	0	否	否	全胚冷冻
1568	1	2016030074	李学松	＜35	32	1	降调节方案	3	321.429	≤10天	7	≤3000	2250	HCG	4	1	0	继发不孕	2.18	＞24	25.3	女方因素	3	7.75	1084	0.83	3	6.5	3	18	1	8	10.4	A-B	IVF	0	0	0	0	0	0	0	是		未受精
570	1	2017060060	李相峰	≥35	39	1	降调节方案	3	311.538	＞10天	13	＞3000	4050	HCG	3	2	1	原发不孕	1.33	≤24	20.5	女方因素	6	1.22	1761	1.04	5	4.77	3.01	55.05	2	11	14.1	A-B	IVF	2	0	2	1	0	0	0	否	否	全胚冷冻
1651	0	2017100124	李相峰	≥35	39	2	拮抗剂方案	2	250	≤10天	10	≤3000	2500	HCG	3	2	1	继发不孕	1.78	≤24	20.5	男方因素	2	1.59	862	0.14	7	4.77	3.01	55.05	2	11	13.4	A	ICSI	6	0	4	1	2	2	0	否	是	移植	未妊娠
129	0	C00013924	韩甜甜	＜35	29	1	拮抗剂方案	2	225	≤10天	6	≤3000	1350	HCG	6	0	0	原发不孕	2.15	＞24	30.9	混合因素	8	2.81	1909	0.42	6	7.74	3.02	23	1	12	0.97	A	ICSI	5	0	2	1	2	2	0	否	是	移植	已妊娠	临床妊娠	宫内妊娠	双胎宫内妊娠
304	1	2016080056	张金玲	＜35	30	1	刺激方案	1	346.154	＞10天	13	＞3000	4500	HCG	1	3	0	继发不孕	2.53	＞24	28	女方因素	7	1.98	2457	2.23	8	6.91	3.02	47.71	1	9	9	B	IVF	7	0	2	0	0	0	0	否	否	全胚冷冻
975	1	C00010545	杨文静	＜35	31	1	刺激方案	1	300	＞10天	11	＞3000	3300	HCG	4	0	0	原发不孕	2.4	≤24	22	女方因素	4	16.73	1363	1.48	4	7.82	3.02	91	1	8	0.63	C	IVF	1	0	3	0	0	0	0	否	否	全胚冷冻
97	0	2017060175	赵爱萍	≥35	38	1	降调节方案	3	271.154	＞10天	13	＞3000	3525	HCG	2	1	1	继发不孕	1.55	≤24	21.9	女方因素	9	3.68	1936	1.73	9	7.25	3.03	37.66	2	11	16.9	B	IVF	7	0	3	1	0	0	0	否	否	全胚冷冻
360	1	2017080096	姜清清	＜35	30	1	降调节方案	3	315	＞10天	15	＞3000	4725	HCG	2	0	0	原发不孕	2.52	≤24	20.4	男方因素	7	1.98	1802	0.36	7	4.24	3.03	42	1	17	9.5	A	ICSI	3	0	2	0	2	2	0	否	是	移植	未妊娠
285	1	C00004951	王红娟	≥35	44	1	刺激方案	1	436.364	＞10天	11	＞3000	4800	HCG	3	3	1	继发不孕	1.31	＞24	25	女方因素	7	19.15	2027	1.07	6	5.39	3.04	60.6	2	7	0.45	A-B	IVF	5	0	4	3	0	0	0	否	否	全胚冷冻
191	1	2018020094	康苹	＜35	34	1	降调节方案	3	308.929	＞10天	14	＞3000	4325	HCG	2	2	1	继发不孕	1.23	≤24	22.8	女方因素	8	1.2	2122	0.75	7	8.55	3.05	50	1	10	13.3	A	IVF	2	0	3	0	1	1	0	否	是	移植	已妊娠	临床妊娠	宫外妊娠	异位妊娠
890	0	C00010664	李梅英	≥35	40	2	降调节方案	3	253.846	＞10天	13	＞3000	3300	HCG	9	3	0	继发不孕	1.83	＞24	27.6	混合因素	5	1.29	1086	0.33	4	7.05	3.05	22	2	9	9.8	A-B	ICSI	2	0	2	0	2	2	0	否	是	移植	未妊娠
1006	1	C00016897	王超男	≥35	35	1	降调节方案	3	300	＞10天	12	＞3000	3600	HCG	10	1	1	继发不孕	2.83	≤24	22.3	女方因素	4	4.98	1244	1.14	3	9.57	3.05	44	2	10	14.7	B	IVF	3	0	1	0	0	0	0	否	否	全胚冷冻
2258	1	2018010093	王春青	≥35	44	2	刺激方案	1	300	≤10天	9	≤3000	2700	HCG	3	5	1	继发不孕	1.54	≤24	23.4	不明原因	4	18.64	939	0.61	5	7.77	3.05	38	2	11			ICSI	4	0	2	0	0	0	0	否	否	全胚冷冻
36	1	C00010600	张淑平	≥35	38	2	拮抗剂方案	2	300	＞10天	16	＞3000	4800	双扳机	9	1	0	继发不孕	2.3	≤24	22	女方因素	9	0.17	2420	3.22	5	5.64	3.06	42.13	2	18	9.3	B	IVF	5	0	2	0	0	0	0	否	否	全胚冷冻
213	0	C00004415	王红	＜35	33	1	降调节方案	3	197.727	＞10天	11	≤3000	2175	HCG	2	2	0	继发不孕	2.3	≤24	20.8	女方因素	8	0.74	1729	0.68	4	5.83	3.06	44	1	16	7.2	A-B	IVF	4	0	4	3	2	2	0	否	是	移植	已妊娠	临床妊娠	宫外妊娠	异位妊娠
268	1	C00017196	邢芸	＜35	31	5	刺激方案	1	300	≤10天	9	≤3000	2700	HCG	3	1	1	继发不孕	3.1	≤24	21.5	男方因素	7	6.34	2304	1.12	6	8.2	3.06	41	1	12	5.3	A	ICSI	4	0	2	1	0	0	0	否	否	全胚冷冻
305	0	C00007633	国洪梅	＜35	31	1	降调节方案	3	225	≤10天	10	≤3000	2250	HCG	6	1	0	继发不孕	2.81	≤24	20	女方因素	7	1.15	2430	0.66	8	8.2	3.06	41	1	16	10.1	A	IVF	6	0	3	0	2	2	0	否	是	移植	已妊娠	临床妊娠	宫内妊娠	单胎宫内妊娠
311	0	C00004634	牛勤英	≥35	37	1	拮抗剂方案	2	247.5	≤10天	10	≤3000	2475	HCG	3	0	0	原发不孕	4.18	＞24	25.7	女方因素	7	2.43	2244	0.76	8	5.64	3.06	42.13	2	18	1.17	A-B	IVF	5	0	4	1	2	2	0	否	是	移植	已妊娠	临床妊娠	宫内妊娠	双胎宫内妊娠
374	0	C00015958	桑林林	＜35	34	2	降调节方案	3	218.75	＞10天	12	≤3000	2625	HCG	9	0	0	原发不孕	2.320	＞24	25	男方因素	7	2.63	1631	1.32	7	6.7	3.06	25.34	1	11	11	A	ICSI	5	0	2	0	2	2	0	否	是	移植	未妊娠
436	1	C00017185	王巍	≥35	38	1	拮抗剂方案	2	315	≤10天	10	＞3000	3150	HCG	7	1	0	继发不孕	2.80	＞24	26	混合因素	6	1.89	836.83	0.72	7	5.83	3.06	44	2	12	12.4	A-B	ICSI	5	0	3	0	0	0	0	否	否	全胚冷冻
700	1	2016050233	王吉焕	≥35	35	1	降调节方案	3	351.786	＞10天	14	＞3000	4925	HCG	2	0	0	原发不孕	2.68	≤24	21.3	不明原因	5	1.2	1687	1.08	8	7.31	3.06	34	2	12	12	A	IVF	6	0	2	0	2	2	0	否	是	移植	未妊娠
395	0	2018060073	耿兵	＜35	34	1	降调节方案	3	200	≤10天	10	≤3000	2000	HCG	1	1	0	继发不孕	2.29	≤24	24	女方因素	7	1.63	1391	1.5	6	5.83	3.07	40	1	16	12.2	A	IVF	4	0	4	2	0	0	0	否	否	全胚冷冻
2036	1	C00011580	卢凤	≥35	38	1	拮抗剂方案	2	342.857	≤10天	7	≤3000	2400	双扳机	2	3	1	继发不孕	1.3	≤24	21.3	女方因素	1	7.64	685	0.43	2	5.83	3.07	40	2	8	1	A	IVF	2	0	2	1	0	0	0	否	否	全胚冷冻
396	1	C00018832	刘宝玉	≥35	40	2	刺激方案	1	340.909	＞10天	11	＞3000	3750	HCG	7	1	0	继发不孕	2.12	＞24	25	男方因素	7	0.53	1378.84	1.19	8	8.35	3.08	28	2	14	9.9	A-B	ICSI	4	0	2	0	2	2	0	否	是	移植	未妊娠
499	0	2016100217	万冷冷	＜35	33	2	降调节方案	3	165.556	≤10天	9	≤3000	1490	HCG	12	0	0	原发不孕	2.27	≤24	21.1	男方因素	6	7.44	2492	1.22	7	7.38	3.08	44	1	9	11.3	A	ICSI	6	0	2	0	2	2	0	否	是	移植	未妊娠
889	1	C00012679	张红	≥35	41	1	刺激方案	1	400	≤10天	6	≤3000	2400	HCG	5	3	1	继发不孕	1.38	＞24	26.4	女方因素	5	2.83	1088	0.31	4	5.34	3.08	66	2	8	0.8	A	IVF	3	0	3	0	2	2	0	否	是	移植	未妊娠
1118	0	C00018283	孙俊凡	≥35	37	1	拮抗剂方案	2	288.889	≤10天	9	≤3000	2600	HCG	2	2	0	继发不孕	1.9	≤24	22	女方因素	4	1.31	1388.07	0.89	4	8.2	3.08	37.07	2	11	6.4	A-B	IVF	2	0	1	0	0	0	0	否	否	全胚冷冻
1434	0	2016060099	万冷冷	＜35	32	1	降调节方案	3	251.923	＞10天	13	＞3000	3275	HCG	12	0	0	原发不孕	1.61	≤24	21.1	女方因素	3	3.11	942	1.03	6	7.38	3.08	56.76	1	9	14.5	A	IVF	5	0	0	0	0	0	0	是		无可移植胚胎
1680	0	C00018665	孙俊凡	≥35	37	2	拮抗剂方案	2	281.25	≤10天	8	≤3000	2250	HCG	2	2	0	继发不孕	1.44	≤24	22	男方因素	2	1.16	794.03	0.6	3	8.2	3.08	37.07	2	11	3.7	B	ICSI	0	0	0	0	0	0	0	是		无可移植胚胎
1070	1	C00012310	李延华	≥35	39	2	拮抗剂方案	2	305.556	≤10天	9	≤3000	2750	双扳机	12	1	1	继发不孕	3.47	≤24	21.9	混合因素	4	3.48	1574	1.24	3	5.8	3.1	68	2	10	12.6	B	ICSI	3	0	3	1	2	2	0	否	是	移植	未妊娠
1103	1	C00010576	李延华	≥35	38	1	降调节方案	3	306.25	＞10天	12	＞3000	3675	HCG	12	1	1	继发不孕	2.63	≤24	21.9	混合因素	4	1.4	1427	0.46	5	5.8	3.1	68	2	7	16	B	ICSI	5	0	1	1	0	0	0	否	否	全胚冷冻
1119	0	2017020160	张红梅	≥35	35	1	降调节方案	3	267.857	＞10天	14	＞3000	3750	HCG	3	2	0	继发不孕	2.15	＞24	29.9	女方因素	4	0.63	1386	1.1	4	14.88	3.1	47.71	2	9	12.2	A	IVF	2	0	1	0	1	1	0	否	是	移植	已妊娠	临床妊娠	宫内妊娠	单胎宫内妊娠
254	0	2016110039	潘玉秋	＜35	31	1	降调节方案	3	250	＞10天	12	≤3000	3000	HCG	3	2	0	继发不孕	3.41	＞24	25	女方因素	7	1.67	1733	0.81	7	8.54	3.11	57	1	17	10	A	IVF	6	0	4	2	2	2	0	否	是	移植	未妊娠
383	0	2017090229	张仕红	≥35	35	3	降调节方案	3	195	≤10天	10	≤3000	1950	HCG	2	3	1	继发不孕	4.26	≤24	19.6	女方因素	7	3.29	1584	0.79	6	5.41	3.11	39.09	2	12	8.9	A	IVF	2	0	2	1	2	2	0	否	是	移植	已妊娠	临床妊娠	宫内妊娠	单胎宫内妊娠
549	0	2017050219	潘玉秋	＜35	31	2	降调节方案	3	150	≤10天	10	≤3000	1500	HCG	3	2	0	继发不孕	3.71	＞24	25	女方因素	7	0.72	1213	0.4	6	8.54	3.11	57	1	17	9.2	A	IVF	6	0	6	3	2	2	0	否	是	移植	已妊娠	临床妊娠	宫外妊娠	异位妊娠
432	0	C00007820	王燕	≥35	42	1	降调节方案	3	212.5	＞10天	14	≤3000	2975	HCG	2	3	1	继发不孕	2.58	＞24	24.8	女方因素	6	1.98	865	0.9	6	8.48	3.12	10	2	9	1.25	A	IVF	4	0	3	2	2	2	0	否	是	移植	已妊娠	临床妊娠	宫内妊娠	单胎宫内妊娠
551	0	2018010023	徐莹莹	＜35	31	1	降调节方案	3	187.5	≤10天	10	≤3000	1875	HCG	3	0	0	继发不孕	1.53	≤24	23.7	女方因素	6	1.34	1897	0.39	4	6.41	3.12	38.08	1	9	9.3	B	IVF	3	0	2	1	2	2	0	否	是	移植	已妊娠	临床妊娠	宫内妊娠	单胚胎停
667	0	2016050154	张谩谩	＜35	27	1	降调节方案	3	239.286	＞10天	14	＞3000	3350	HCG	4	0	0	原发不孕	4.25	≤24	22.2	女方因素	5	1.21	1431	1.57	6	5.29	3.12	63	1	10	11.2	B	IVF	0	0	0	0	0	0	0	是		未受精
991	1	C00016925	王秋菊	≥35	40	1	刺激方案	1	300	＞10天	11	＞3000	3300	HCG	2	0	0	原发不孕	1.83	＞24	26.2	女方因素	4	5.09	1313	2.05	4	6.85	3.12	32	2	9	10.3	A-B	IVF	2	0	2	0	0	0	0	否	否	全胚冷冻
530	1	2018050058	于聪灵	≥35	40	1	刺激方案	1	415.909	＞10天	11	＞3000	4575	HCG	2	2	1	继发不孕	1.95	＞24	24.4	不明原因	6	9.28	2129	2.01	4	7.32	3.15	45.76	2	9	5.8	A	IVF	3	0	1	0	0	0	0	否	否	全胚冷冻
574	1	2018070002	王兆霞	≥35	39	2	刺激方案	1	450	≤10天	9	＞3000	4050	HCG	3	2	1	继发不孕	1.2	＞24	37.3	女方因素	6	4.91	1722	0.66	2	7.49	3.15	80.6	2	9	6.2	B-C	IVF	1	0	0	0	0	0	0	是		无可移植胚胎
835	1	2017100037	王兆霞	≥35	38	1	降调节方案	3	300	＞10天	12	＞3000	3600	HCG	3	2	1	继发不孕	2.1	＞24	37.3	女方因素	5	1.26	1416	0.69	1	7.49	3.15	52	2	9	8	B	IVF	1	0	1	0	1	1	0	否	是	移植	未妊娠
1247	1	C00007325	王燕	≥35	39	1	拮抗剂方案	2	450	≤10天	7	＞3000	3150	HCG	3	2	1	继发不孕	2.64	＞24	25.2	混合因素	3	5.08	913	0.58	4	10.1	3.15	49	2	8	10.2	A	ICSI	1	0	1	0	1	1	0	否	是	移植	未妊娠
1825	0	2018050166	房燕	≥35	45	4	刺激方案	1	150	≤10天	8	≤3000	1200	HCG	1	3	1	继发不孕	1.2	≤24	24	女方因素	2	19.45	502	0.38	2	8.2	3.15	43.36	2	10	9	A	IVF	2	0	0	0	0	0	0	是		无可移植胚胎
184	0	2016020004	叶红	≥35	38	1	降调节方案	3	150	＞10天	12	≤3000	1800	HCG	2	4	1	继发不孕	2.58	＞24	31.6	女方因素	8	3.32	2255	0.61	7	6.98	3.16	46	2	12	14.2	A	IVF	6	0	2	1	2	2	0	否	是	移植	已妊娠	临床妊娠	宫内妊娠	单胎宫内妊娠
73	1	2018030271	王小燕	≥35	35	1	降调节方案	3	356.25	＞10天	12	＞3000	4275	HCG	3	1	1	继发不孕	1.6	＞24	28.8	女方因素	9	1.16	2426	0.51	8	7.52	3.17	23	2	11	10.6	A-B	IVF	4	0	4	0	0	0	0	否	否	全胚冷冻
561	0	2017030163	费文霞	＜35	29	1	降调节方案	3	141.667	≤10天	9	≤3000	1275	HCG	2	0	0	原发不孕	2.56	≤24	21.2	女方因素	6	0.4	1835	1.5	8	5.63	3.17	41.75	1	15	11.7	A-B	IVF	4	0	2	1	0	0	0	否	否	全胚冷冻
1320	0	2017100084	柳兆荣	＜35	32	2	降调节方案	3	277.5	≤10天	10	≤3000	2775	HCG	1	2	1	继发不孕	2.32	≤24	22.5	女方因素	3	0.5	693	0.26	2	11.54	3.17	38	1	8	9	A	IVF	1	0	0	0	0	0	0	是		无可移植胚胎
964	0	2017060071	陈春梅	≥35	37	1	刺激方案	1	225	≤10天	10	≤3000	2250	HCG	3	3	2	继发不孕	3.18	＞24	25.1	女方因素	4	14.73	1404	2.45	5	7.27	3.18	42.05	2	8	8	A	IVF	4	0	2	0	0	0	0	否	否	全胚冷冻
1215	1	2016030152	刘艳丽	＜35	33	2	刺激方案	1	311.538	＞10天	13	＞3000	4050	HCG	5	2	1	原发不孕	2.19	＞24	32.4	女方因素	4	8.98	1149	1.09	4	5.3	3.19	41.75	1	10	16.7	A-B	IVF	4	0	2	0	2	2	0	否	是	移植	已妊娠	临床妊娠	宫内妊娠	单胚胎停
117	0	C00010697	王慧	＜35	23	1	降调节方案	3	225	＞10天	11	≤3000	2475	HCG	3	1	0	继发不孕	2.97	≤24	23.7	女方因素	9	1.68	1532	0.36	7	5.96	3.2	22	1	25	0.88	A-B	IVF	3	2	4	0	2	2	0	否	是	移植	已妊娠	临床妊娠	宫内妊娠	双胎宫内妊娠
204	1	2018020037	徐银芳	≥35	42	1	降调节方案	3	381.818	＞10天	11	＞3000	4200	HCG	2	0	0	原发不孕	1.89	≤24	21.6	女方因素	8	0.85	1870	1.23	8	8.5	3.2	50	2	12	1.14	A	IVF	3	2	2	0	0	0	0	否	否	全胚冷冻
647	0	2016120085	杨春红	≥35	38	1	降调节方案	3	275	≤10天	8	≤3000	2200	HCG	6	1	1	继发不孕	2.09	≤24	23.8	女方因素	5	0.84	861	1.37	5	7.76	3.2	39.09	2	13	18.7	C	IVF	3	0	3	2	0	0	0	否	否	全胚冷冻
660	0	2016120219	潘玉红	≥35	43	2	刺激方案	1	150	≤10天	10	≤3000	1500	HCG	1	2	1	继发不孕	2.02	＞24	27	男方因素	5	7.55	1458	1.88	4	5.3	3.2	21	2	7	7	B	ICSI	2	0	2	0	0	0	0	否	否	全胚冷冻
1172	1	2016060084	商伟伟	＜35	30	1	降调节方案	3	342.308	＞10天	13	＞3000	4450	HCG	2	1	0	继发不孕	1.68	≤24	20.4	女方因素	4	1.69	1178	0.54	5	6.3	3.2	24	1	8	11.7	A	IVF	5	0	4	1	2	2	0	否	是	移植	未妊娠
1803	0	C00015607	任成凤	＜35	28	1	拮抗剂方案	2	187.5	≤10天	10	≤3000	1875	双扳机	1	4	0	继发不孕	1.96	＞24	25.6	女方因素	2	5.97	535	0.69	3	10.82	3.2	67	1	6	11.8	A	IVF	2	0	0	0	0	0	0	是		无可移植胚胎
2130	0	C00008580	肖熙越	＜35	32	1	拮抗剂方案	2	150	≤10天	9	≤3000	1350	双扳机	3	0	0	继发不孕	1.31	≤24	20.2	混合因素	1	20.05	415	0.43		13.67	3.2	26	1	12	8.2	A-B		0	0	0	0	0	0	0	是		未取卵
293	1	2018040253	苏海燕	＜35	30	1	降调节方案	3	360	＞10天	15	＞3000	5400	HCG	2	1	0	继发不孕	2.55	＞24	26.8	女方因素	10	1.59	2886	0.64	8	7.9	3.21	47.71	1	14	15.2	A	IVF	6	0	6	2	0	0	0	否	否	全胚冷冻
1029	0	2016110011	郭英霞	≥35	40	1	拮抗剂方案	2	289.286	＞10天	14	＞3000	4050	HCG	1	2	1	继发不孕	1.45	＞24	30.8	女方因素	4	0.92	1147.22	1.53	6	6.61	3.21	29.09	2	11	8.3	A	IVF	4	0	0	0	0	0	0	是		无可移植胚胎
1110	1	C00016836	张淑华	≥35	35	2	刺激方案	1	450	≤10天	8	＞3000	3600	HCG	3	1	1	继发不孕	3.03	≤24	23	女方因素	4	10.61	1405	0.59	4	10.18	3.21	58	2	8	0.55	A	IVF	4	0	4	2	0	0	0	否	否	全胚冷冻
1453	0	2017020073	郑妮	＜35	33	1	降调节方案	3	168.75	≤10天	8	≤3000	1350	HCG	2	2	1	继发不孕	3.37	＞24	24.4	女方因素	3	0.87	897	0.54	5	9.3	3.21	26.43	1	12	9	A-B	IVF	5	0	3	2	2	2	0	否	是	移植	未妊娠
1900	1	2016120090	张慧	≥35	35	2	降调节方案	3	437.5	≤10天	8	＞3000	3500	HCG	4	0	0	原发不孕	1.92	＞24	27.8	男方因素	2	6.17	522	1.16	2	7.35	3.21	39.5	2	6	8.2	A-B	ICSI	0	0	0	0	0	0	0	是		无可移植胚胎
222	0	2018060196	于永梅	≥35	39	5	降调节方案	3	152.941	＞10天	17	≤3000	2600	HCG	12	0	0	原发不孕	1.97	＞24	27.3	女方因素	8	1.36	1590	0.78	8	6.5	3.23	45.67	2	9	12.6	A	IVF	3	0	0	0	0	0	0	是		无可移植胚胎
681	1	C00010323	贾鹏	≥35	42	1	降调节方案	3	382.5	≤10天	10	＞3000	3825	HCG	2	2	0	继发不孕	1.32	≤24	21.6	女方因素	5	2.69	1806	1.24	6	4.51	3.23	40.32	2	14	13	B	IVF	6	0	4	2	2	2	0	否	是	移植	未妊娠
1487	1	C00007016	于雪莲	≥35	39	1	降调节方案	3	320.833	＞10天	18	＞3000	5775	HCG	10	0	0	原发不孕	2.51	≤24	23.3	混合因素	3	4.04	823	0.45	3	3.35	3.23	10	2	10	1.05	A	ICSI	2	0	2	0	2	2	0	否	是	移植	未妊娠
1711	1	C00003682	邱文	≥35	40	1	降调节方案	3	331.25	＞10天	12	＞3000	3975	HCG	2	5	1	继发不孕	1.57	＞24	28.7	女方因素	2	0.66	729	0.29	2	4.51	3.23	40.32	2	8	12.8	B	IVF	1	0	1	0	0	0	0	否	否	全胚冷冻
1788	0	C00011114	徐艳丽	≥35	35	2	拮抗剂方案	2	150	≤10天	8	≤3000	1200	HCG	1	1	1	继发不孕	2.7	≤24	23.9	女方因素	2	3.22	567	0.28	2	7.41	3.24	23	2	9	12.5	A-B	IVF	1	0	2	0	1	1	0	否	是	移植	未妊娠
411	1	2018040176	周桂丽	≥35	39	2	刺激方案	1	375	＞10天	11	＞3000	4125	HCG	3	3	1	继发不孕	1.29	＞24	26.6	女方因素	7	6.33	1223	0.77	7	9.15	3.25	53	2	8	6.7	B	IVF	1	0	1	0	0	0	0	否	否	全胚冷冻
442	1	2018060233	王立静	≥35	44	1	刺激方案	1	300	≤10天	9	≤3000	2700	HCG	2	4	1	继发不孕	1.94	＞24	26.4	混合因素	6	8.36	1848	1.56	4	8.4	3.25	59.09	2	10	6.9	A-B	ICSI	2	0	2	0	0	0	0	否	否	全胚冷冻
944	0	C00018999	邵卫卫	≥35	39	2	拮抗剂方案	2	236.111	≤10天	9	≤3000	2125	HCG	1	4	1	继发不孕	2.1	≤24	22.9	男方因素	4	2.7	790.83	0.69	3	8.58	3.25	39	2	9	8.5	B	ICSI	1	0	1	0	1	1	0	否	是	移植	未妊娠
1034	1	C00004888	李辉	＜35	31	1	刺激方案	1	383.333	≤10天	9	＞3000	3450	HCG	3	0	0	原发不孕	3.49	≤24	21.1	男方因素	4	10.11	1125	1.13	6	11.52	3.25	60	1	16	0.51	A	ICSI	0	0	0	0	0	0	0	是		无可移植胚胎
1413	1	C00013299	王鑫	≥35	36	1	刺激方案	1	300	≤10天	9	≤3000	2700	HCG	11	1	0	继发不孕	1.53	≤24	19.1	女方因素	3	4.54	856	1.14	1	9.74	3.25	71	2	6	1.33	A	IVF	1	0	1	0	1	1	0	否	是	移植	未妊娠
1668	1	C00010267	张慧	＜35	30	1	刺激方案	1	375	≤10天	9	＞3000	3375	HCG	5	0	0	原发不孕	1.36	≤24	22.7	女方因素	2	10.66	830	1.32	1	11.71	3.25	22.69	1	6	0.67	B	IVF	0	0	0	0	0	0	0	是		无可移植胚胎
571	0	2018020046	张焕英	≥35	36	1	降调节方案	3	287.5	＞10天	15	＞3000	4312.5	HCG	15	0	0	原发不孕	2.63	＞24	27.3	女方因素	6	0.77	1746	0.77	6	6.88	3.26	71	2	8	15.2	B	IVF	3	0	1	0	0	0	0	否	否	全胚冷冻
795	0	2016120040	刘立梅	≥35	35	2	拮抗剂方案	2	197.222	≤10天	9	≤3000	1775	HCG	5	0	0	原发不孕	2.20	≤24	23.4	女方因素	5	3.28	1661	1.14	7	8.53	3.26	51.75	2	18	11	A-B	IVF	4	0	1	0	1	1	0	否	是	移植	未妊娠
547	1	C00013004	吴瑞丽	＜35	34	1	拮抗剂方案	2	293.75	＞10天	12	＞3000	3525	HCG	3	2	1	继发不孕	1.66	＞24	26	女方因素	6	3.17	1978	0.73	6	13.28	3.27	44	1	15			IVF	3	0	3	1	2	2	0	否	是	移植	已妊娠	临床妊娠	宫内妊娠	单胎宫内妊娠
29	0	C00013075	史汇杰	≥35	35	1	拮抗剂方案	2	200	≤10天	7	≤3000	1400	HCG	2	0	0	原发不孕	2.98	≤24	18.4	女方因素	7	6.84	2811	1.53	8	5.69	3.28	43.29	2	14	1.3	A-B	IVF	6	0	5	3	0	0	0	否	否	全胚冷冻
30	1	C00016024	陈晨	＜35	34	1	拮抗剂方案	2	293.75	≤10天	10	≤3000	2937.5	HCG	2	0	0	原发不孕	2.54	≤24	23	男方因素	9	1.44	2678	1.44	9	5.69	3.28	43.29	1	14	12.8	A-B	IVF	2	0	1	0	1	1	0	否	是	移植	未妊娠
39	0	2017110238	孟庆松	≥35	42	1	拮抗剂方案	2	200	≤10天	7	≤3000	1400	HCG	2	2	1	继发不孕	1.8	≤24	21.7	混合因素	9	3.03	2319	0.74	6	5.69	3.28	43.29	2	8	11.3	B	ICSI	4	0	3	1	0	0	0	否	否	全胚冷冻
60	0	C00016861	陈晨	＜35	34	2	降调节方案	3	212.5	＞10天	12	≤3000	2550	HCG	2	0	0	原发不孕	2.55	≤24	23	男方因素	9	2.94	2765	1.1	9	5.69	3.28	43.29	1	13	10.8	A-B	ICSI	5	0	2	1	0	0	0	否	否	全胚冷冻
93	0	C00009771	汤晶	＜35	32	1	降调节方案	3	211.364	＞10天	11	≤3000	2325	HCG	7	2	0	原发不孕	1.89	≤24	19.7	女方因素	9	2.56	1972	2.77	6	10.65	3.28	22	1	18	11.8	A	IVF	4	0	3	2	0	0	0	否	否	全胚冷冻
155	0	2017060112	齐凤珍	≥35	38	1	降调节方案	3	243.75	＞10天	12	≤3000	2925	HCG	3	2	2	继发不孕	1.59	≤24	23.1	女方因素	8	1.36	1856	0.68	9	6.41	3.28	59.3	2	11	16.9	B	IVF	3	0	3	1	0	0	0	否	否	全胚冷冻
524	0	2017100141	郁登敏	＜35	34	1	拮抗剂方案	2	250	≤10天	9	≤3000	2250	HCG	1	0	0	原发不孕	2.26	≤24	22.5	不明原因	6	5.95	2198	1.06	8	10.78	3.28	86.43	1	12	10	A-B	IVF	6	0	4	1	0	0	0	否	否	全胚冷冻
1384	1	2016040224	党迎迎	＜35	33	1	降调节方案	3	375	＞10天	13	＞3000	4875	HCG	7	0	0	原发不孕	2.72	＞24	35.4	女方因素	3	0.98	896	0.52	6	8.16	3.28	57	1	12	9	B	IVF	4	0	3	1	2	2	0	否	是	移植	未妊娠
2276	0	C00010175	耿姗姗	＜35	31	1	降调节方案	3	201.562	＞10天	16	＞3000	3225	HCG	7	2	0	继发不孕	2.48	≤24	18.8	女方因素	8	4.69	1606	0.24	9	10.8	3.28	23	1	14			IVF	6	0	4	1	2	2	0	否	是	移植	已妊娠	临床妊娠	宫内妊娠	单胎宫内妊娠
614	0	2017070025	刘成丽	≥35	35	1	降调节方案	3	210	≤10天	10	≤3000	2100	HCG	5	1	0	原发不孕	1.25	＞24	26.5	女方因素	6	0.53	1339	1	6	7.91	3.29	35.42	2	10	11	A	IVF	5	0	4	3	2	2	0	否	是	移植	已妊娠	临床妊娠	宫内妊娠	单胚胎停
692	1	C00003802	葛同娟	＜35	34	1	拮抗剂方案	2	333.333	≤10天	9	≤3000	3000	HCG	4	1	1	继发不孕	3.34	≤24	20.6	女方因素	5	3.76	1755	1.11	8	5.53	3.29	89	1	13	14	A-B	IVF	5	0	2	1	2	2	0	否	是	移植	未妊娠
1277	0	C00019007	苏爱欣	≥35	38	1	拮抗剂方案	2	225	≤10天	7	≤3000	1575	HCG	9	2	1	继发不孕	2.42	≤24	20.4	女方因素	3	0.68	855.16	0.68	4	7.29	3.29	42	2	9	9.9	B	IVF	3	0	2	2	0	0	0	否	否	全胚冷冻
743	0	2017120275	赵继婷	≥35	37	1	刺激方案	1	258.333	≤10天	9	≤3000	2325	HCG	1	2	1	继发不孕	2.05	≤24	21.5	女方因素	5	8.38	1434	1.13	6	7.92	3.3	95.42	2	13	7	B-C	IVF	2	0	1	0	0	0	0	否	否	全胚冷冻
200	0	C00018851	王菲菲	≥35	36	1	降调节方案	3	248.077	＞10天	13	＞3000	3225	HCG	3	0	0	原发不孕	2.76	＞24	28.7	女方因素	5	1.24	867.39	0.78	7	6.52	3.31	34.75	2	13	11.1	A	IVF	6	0	5	2	0	0	0	否	否	全胚冷冻
441	0	C00003342	宿萍	≥35	37	2	刺激方案	1	270	≤10天	10	≤3000	2700	HCG	5	0	0	原发不孕	1.20	≤24	22.9	混合因素	6	4.47	1855	1.65	3	8.53	3.31	31	2	7	6		ICSI	2	0	1	0	0	0	0	否	否	全胚冷冻
1485	0	2017070225	宿萍	≥35	35	1	刺激方案	1	195	≤10天	10	≤3000	1950	HCG	5	0	0	原发不孕	2.54	≤24	22.9	女方因素	3	5.49	836.18	0.67	4	8.53	3.31	31	2	7	5.5	B	IVF	4	0	2	1	0	0	0	否	否	全胚冷冻
738	1	C00005860	李芳	≥35	36	2	拮抗剂方案	2	433.333	≤10天	9	＞3000	3900	HCG	3	2	0	继发不孕	1.49	≤24	19.4	男方因素	5	7.88	1455	1.2	3	8.73	3.32	55	2	8	11.8	A	ICSI	3	0	1	0	0	0	0	否	否	全胚冷冻
1399	1	2018040258	谭新彩	≥35	42	1	降调节方案	3	300	≤10天	9	≤3000	2700	HCG	6	0	0	原发不孕	1.52	≤24	22.9	男方因素	3	1.95	886	0.4	8	5.25	3.32	55.05	2	10	8.6	A	ICSI	7	0	4	2	2	2	0	否	是	移植	未妊娠
113	0	C00006390	高淑娟	＜35	34	1	降调节方案	3	190.909	＞10天	11	≤3000	2100	HCG	1	3	1	继发不孕	2.72	≤24	23.7	女方因素	9	1.91	1704	0.37	9	7.21	3.33	26.18	1	14	11.4	A	IVF	5	1	1	0	1	0	1	否	是	移植	未妊娠
127	0	C00004477	崔连芳	＜35	27	2	降调节方案	3	272.222	≤10天	9	≤3000	2450	HCG	1	0	0	原发不孕	1.70	≤24	23.6	混合因素	8	0.71	1947	2.04	6	7.14	3.33	32.34	1	10	12.7	A	ICSI	5	0	2	0	0	0	0	否	否	全胚冷冻
81	0	2017120153	刘立杰	＜35	31	1	降调节方案	3	257.143	＞10天	14	＞3000	3600	HCG	1	0	0	原发不孕	2.56	＞24	24.8	女方因素	9	2.35	2250	1.05	9	8.77	3.34	45.98	1	18	12.3	A	IVF	4	0	2	0	0	0	0	否	否	全胚冷冻
1038	1	2017040073	王素楠	＜35	31	1	降调节方案	3	293.182	＞10天	11	＞3000	3225	HCG	6	0	0	原发不孕	4.17	＞24	24.4	不明原因	4	0.95	1120	1.18	7	7.29	3.35	35.23	1	9	10.2	A-B	IVF	6	0	2	0	2	2	0	否	是	移植	未妊娠
1936	0	C00006835	贾兰	≥35	43	2	刺激方案	1	180	≤10天	5	≤3000	900	双扳机	11	3	1	继发不孕	2.31	≤24	20.8	女方因素	2	2.75	432	0.3	3	5.44	3.36	10	2	7	8.5	B	IVF	0	0	0	0	0	0	0	是		无可移植胚胎
77	0	2018030274	许丹丹	＜35	32	1	降调节方案	3	231.25	＞10天	12	≤3000	2775	HCG	1	2	0	继发不孕	3.82	＞24	26.6	女方因素	9	1.52	2319	0.7	9	7.1	3.37	37	1	16	13.7	A	IVF	8	0	4	2	0	0	0	否	否	全胚冷冻
683	0	2016080151	郝增凤	≥35	46	5	拮抗剂方案	2	150	≤10天	7	≤3000	1050	HCG	8	1	1	继发不孕	1.2	≤24	23.4	混合因素	5	2.4	1800	0.46	7	8.79	3.37	39.09	2	11	7.9		ICSI	5	0	4	3	0	0	0	否	否	全胚冷冻
1143	1	2018010052	韩敏	≥35	40	1	拮抗剂方案	2	350	≤10天	5	≤3000	1750	HCG	4	0	0	原发不孕	2.340	≤24	20.7	混合因素	4	5.13	1303	0.76	7	8.4	3.37	93.36	2	8	10.2	A	ICSI	4	0	2	0	0	0	0	否	否	全胚冷冻
1906	0	2016060234	郝增凤	≥35	46	4	刺激方案	1	150	≤10天	7	≤3000	1050	HCG	8	1	1	继发不孕	1.55	≤24	23.4	混合因素	2	9.79	510	0.74	2	8.79	3.37	39.09	2	11		A	ICSI	1	0	1	0	0	0	0	否	否	全胚冷冻
1071	1	2016030159	孙姣姣	＜35	29	1	降调节方案	3	333.333	≤10天	9	≤3000	3000	HCG	6	0	0	原发不孕	2.22	≤24	21.4	男方因素	4	2.36	1572	1.48	6	8.61	3.38	40.09	1	12	11.5	A	ICSI	1	0	1	0	0	0	0	否	否	全胚冷冻
1086	0	C00004246	程小玲	≥35	45	1	刺激方案	1	225	≤10天	7	≤3000	1575	HCG	8	0	0	继发不孕	1.89	＞24	30.5	女方因素	4	5.64	1498	1.03	3	12.94	3.38	47	2	7	0.62	A	IVF	0	0	0	0	0	0	0	是		无可移植胚胎
1583	0	2018040169	高云霞	＜35	34	1	降调节方案	3	270	≤10天	10	≤3000	2700	HCG	9	0	0	原发不孕	1.58	≤24	23.3	男方因素	3	1.64	1040	1.15	5	4.71	3.38	34.04	1	12	13.2	A	ICSI	0	0	0	0	0	0	0	是		无可移植胚胎
1063	1	C00005969	周金娟	≥35	35	2	拮抗剂方案	2	321.429	≤10天	7	≤3000	2250	HCG	1	0	0	继发不孕	2.32	≤24	14.9	男方因素	4	1.13	1641	0.96	4	6.3	3.39	54	2	7	14.7	B	ICSI	2	0	0	0	0	0	0	是		无可移植胚胎
1242	1	C00004509	周金娟	＜35	34	1	降调节方案	3	365	≤10天	10	＞3000	3650	HCG	1	0	0	原发不孕	1.89	≤24	14.9	男方因素	3	0.26	934	1.21	2	6.3	3.39	54	1	7	13.8	A-B	ICSI	1	0	1	0	1	1	0	否	是	移植	未妊娠
83	0	2018030010	韩学艳	＜35	34	2	降调节方案	3	225	≤10天	9	≤3000	2025	HCG	2	0	0	原发不孕	2.60	≤24	23.8	男方因素	9	0.44	2161	0.9	7	8.87	3.41	35.42	1	9	10.6	B-C	ICSI	5	0	2	0	2	2	0	否	是	移植	未妊娠
910	0	2017090182	韩学艳	＜35	33	1	降调节方案	3	210	≤10天	10	≤3000	2100	HCG	2	0	0	原发不孕	1.48	≤24	23.8	女方因素	4	3.6	968	0.96	4	8.87	3.41	65.69	1	9	13.5	A	IVF	2	0	0	0	0	0	0	是		无可移植胚胎
1314	0	C00005445	韩学艳	≥35	36	3	刺激方案	1	150	≤10天	7	≤3000	1050	HCG	2	0	0	原发不孕	1.62	≤24	23.8	男方因素	3	1.79	725	0.45	4	8.87	3.41	65.69	2	9	11.7	A	ICSI	2	0	0	0	2	2	0	否	是	移植	已妊娠	临床妊娠	宫内妊娠	单胎宫内妊娠
1324	1	C00018116	李晓	＜35	31	1	刺激方案	1	300	≤10天	8	≤3000	2400	HCG	3	0	0	原发不孕	1.26	＞24	27.9	女方因素	3	4.78	673.43	1.17	4	8.46	3.41	22.29	1	7	6.8	A-B	IVF	1	0	0	0	0	0	0	是		无可移植胚胎
2274	1	2017100036	黄丽	≥35	39	2	降调节方案	3	292.5	≤10天	10	≤3000	2925	HCG	1	3	1	继发不孕	2.64	＞24	24.1	男方因素	4	3.24	1008	0.28	5	6.69	3.41	26	2	8			ICSI	3	0	3	3	2	2	0	否	是	移植	未妊娠
44	0	C00006371	王道利	≥35	35	1	降调节方案	3	240	≤10天	10	≤3000	2400	HCG	6	1	1	继发不孕	2.13	＞24	26.4	女方因素	9	0.41	2155	0.68	9	7.52	3.42	28	2	20	15.8	A-B	IVF	2	0	0	0	0	0	0	是		无可移植胚胎
902	1	C00010426	司继兰	≥35	41	1	降调节方案	3	381.25	＞10天	12	＞3000	4575	HCG	1	4	1	继发不孕	1.9	≤24	20.5	女方因素	5	1.01	1000	0.8	5	8.13	3.42	56	2	9	11.9	A	IVF	5	0	0	0	0	0	0	是		无可移植胚胎
1183	0	C00006291	张海珠	＜35	31	1	降调节方案	3	200	≤10天	9	≤3000	1800	HCG	1	1	0	继发不孕	1.48	≤24	22.3	女方因素	4	5.56	1123	1.09	6	7	3.42	22	1	8	11.8	A	IVF	1	0	2	0	2	2	0	否	是	移植	未妊娠
1222	1	C00010208	张海珠	＜35	31	2	拮抗剂方案	2	307.5	≤10天	10	＞3000	3075	双扳机	1	1	0	继发不孕	1.2	≤24	22.3	男方因素	3	2.08	988	0.78	7	7	3.42	22	1	8	12.3	A	ICSI	7	0	4	0	2	2	0	否	是	移植	已妊娠	临床妊娠	宫内妊娠	单胎宫内妊娠
196	0	C00007283	李倩雯	＜35	26	1	降调节方案	3	236.538	＞10天	13	＞3000	3075	HCG	3	0	0	原发不孕	2.22	＞24	26.3	女方因素	8	2.91	2016	0.42	9	12.76	3.43	25	1	15	1.32	A-B	IVF	5	1	2	0	1	1	0	否	是	移植	已妊娠	临床妊娠	宫内妊娠	单胎宫内妊娠
240	1	C00004793	李洋	＜35	29	2	降调节方案	3	300	≤10天	7	≤3000	2100	HCG	5	1	0	继发不孕	2.47	≤24	21.1	女方因素	8	0.16	1015	2.25	8	6.87	3.43	52	1	15	0.9	A	IVF	7	0	4	0	0	0	0	否	否	全胚冷冻
620	0	2017010123	魏凤梅	＜35	33	1	降调节方案	3	257.5	≤10天	10	≤3000	2575	HCG	4	0	0	继发不孕	1.77	≤24	23.1	女方因素	6	1.95	2190	0.82	6	6.27	3.43	25.42	1	12	13.1	A	IVF	6	0	6	0	0	0	0	否	否	全胚冷冻
641	0	C00003517	李洋	＜35	29	1	降调节方案	3	172.5	≤10天	10	≤3000	1725	HCG	5	1	0	继发不孕	3.0	≤24	21.1	女方因素	5	1.22	950	1.96	5	6.87	3.43	52	1	12	9.8	A	IVF	2	0	2	0	2	2	0	否	是	移植	未妊娠
698	0	C00016334	李娟	≥35	35	1	拮抗剂方案	2	206.25	≤10天	8	≤3000	1650	HCG	5	0	0	原发不孕	1.83	≤24	21.5	混合因素	5	2.08	1702	0.68	7	10.21	3.45	28	2	14	9.1	A	ICSI	2	0	0	0	0	0	0	是		无可移植胚胎
844	1	C00006219	鲁桂芹	≥35	40	5	刺激方案	1	300	≤10天	8	≤3000	2400	HCG	1	3	0	继发不孕	1.37	＞24	29.3	女方因素	5	1.34	1362	0.77	6	6.55	3.45	53	2	8	1.12	B	IVF	5	0	1	1	0	0	0	否	否	全胚冷冻
886	0	2016120157	杨文静	＜35	30	3	降调节方案	3	245	＞10天	15	＞3000	3675	HCG	3	1	1	继发不孕	2.58	＞24	29.7	男方因素	5	1.91	1102	0.43	3	6.13	3.46	46.81	1	22	22.3	A-B	ICSI	2	0	2	0	0	0	0	否	否	全胚冷冻
1163	1	C00006902	何道英	≥35	40	2	降调节方案	3	321.875	＞10天	24	＞3000	7725	HCG	3	1	1	继发不孕	1.34	＞24	25.4	女方因素	4	8.97	1206	1.39	4	9.27	3.46	68	2	15	1	A-B	IVF	2	0	2	0	2	2	0	否	是	移植	未妊娠
1202	0	C00017336	刘蕾	＜35	34	1	拮抗剂方案	2	200	≤10天	8	≤3000	1600	HCG	1	3	1	继发不孕	2.83	＞24	25	女方因素	4	2.99	1043	0.6	6	5.99	3.46	22	1	12	7.7	A	IVF	3	0	3	1	0	0	0	否	否	全胚冷冻
2165	0	C00013396	吴慧慧	≥35	35	7	降调节方案	3	278.571	＞10天	14	＞3000	3900	HCG	7	0	0	原发不孕	2.15	＞24	27.3	女方因素	1	7.94	329	0.05	0	6.57	3.46	31	2	11	9.7	A		0	0	0	0	0	0	0	是		未取到卵
801	1	C00015604	蒙延坤	＜35	32	2	降调节方案	3	389.062	＞10天	16	＞3000	6225	HCG	1	4	2	继发不孕	1.51	＞24	24.2	女方因素	5	2.57	1622	1.03	7	10.3	3.47	63	1	10	13.6	A-B	IVF	2	0	2	1	0	0	0	否	否	全胚冷冻
1123	1	C00012144	蒙延坤	＜35	32	1	拮抗剂方案	2	322.5	≤10天	10	＞3000	3225	HCG	6	3	2	继发不孕	2.47	＞24	24.2	女方因素	4	7.71	1363	0.5	5	10.3	3.47	63	1	10	8.1	A	IVF	2	0	2	1	2	2	0	否	是	移植	已妊娠	临床妊娠	宫内妊娠	单胚胎停
1284	0	2018010124	刘燕	＜35	33	1	刺激方案	1	259.375	＞10天	32	＞3000	8300	HCG	1	0	0	原发不孕	3.99	＞24	24.2	女方因素	3	2.39	823	2.07	4	6.7	3.47	29.09	1	10	15.8	B-C	IVF	1	0	1	0	0	0	0	否	否	全胚冷冻
505	0	2018060011	贾宝利	＜35	25	1	拮抗剂方案	2	281.944	≤10天	9	≤3000	2537.5	双扳机	3	0	0	原发不孕	1.81	≤24	17.5	女方因素	6	1.09	2437	1.67	6	15.21	3.48	35	1	9	11.8	A	IVF	0	0	0	0	0	0	0	否	否	全胚冷冻
640	1	C00011048	张志云	≥35	43	2	拮抗剂方案	2	325	≤10天	8	≤3000	2600	HCG	3	3	1	继发不孕	1.76	＞24	26.4	混合因素	5	2.12	1954	1.64	6	9.66	3.48	36	2	9	8.3	A	ICSI	3	0	2	1	2	2	0	否	是	移植	未妊娠
2266	1	2016020012	宁尚玉	＜35	32	1	降调节方案	3	300	≤10天	9	≤3000	2700	HCG	5	1	0	原发不孕	1.64	＞24	25.6	女方因素	7	4.12	1323	1.07	7	6.81	3.48	50.5	1	9			IVF	3	0	3	3	2	2	0	否	是	移植	已妊娠	临床妊娠	宫内妊娠	单胎宫内妊娠
112	0	C00015749	姜洋	＜35	33	1	降调节方案	3	202.941	＞10天	17	＞3000	3450	HCG	3	0	0	原发不孕	2.50	≤24	20.8	女方因素	9	1.09	1704	0.92	8	5.8	3.49	40	1	14	11.3	A	IVF	5	0	2	1	0	0	0	否	否	全胚冷冻
164	0	2018070103	刘霞	＜35	32	1	拮抗剂方案	2	188.393	＞10天	28	＞3000	5275	HCG	4	1	0	继发不孕	1.67	≤24	19.2	女方因素	8	0.31	2705	1.09	5	4.86	3.49	59.09	1	9	10.6	A	IVF	3	0	2	1	2	2	0	否	是	移植	未妊娠
658	0	C00008461	姚敏	≥35	39	1	降调节方案	3	231.25	＞10天	12	≤3000	2775	HCG	5	2	1	继发不孕	2.3	＞24	25.3	女方因素	5	1.12	521	0.43	3	11.97	3.49	34	2	12	1.47	A	IVF	1	0	2	0	2	2	0	否	是	移植	未妊娠
874	1	2016120005	刘建梅	≥35	41	4	刺激方案	1	428.571	＞10天	14	＞3000	6000	HCG	5	1	1	继发不孕	1.76	＞24	29.7	混合因素	5	1.1	1175	0.76	3	6.75	3.49	93	2	10	12	B	ICSI	1	0	1	0	0	0	0	否	否	全胚冷冻
878	1	2016030162	刘建梅	≥35	40	1	降调节方案	3	350	＞10天	15	＞3000	5250	HCG	5	0	0	继发不孕	3.20	＞24	29.7	男方因素	5	6.06	1157	1.26	3	6.75	3.49	33.36	2	10	11	A	ICSI	2	0	1	0	1	1	0	否	是	移植	未妊娠
1121	1	2016030002	赵丽丽	＜35	34	1	刺激方案	1	348.214	＞10天	14	＞3000	4875	双扳机		0	0	原发不孕	1.42	＞24	27.3	男方因素	4	13.98	1373	0.89	5	5.8	3.49	40	1	15	10	A	ICSI	4	0	2	0	0	0	0	否	否	全胚冷冻
1182	0	2017060201	刘建梅	≥35	41	5	刺激方案	1	225	＞10天	11	≤3000	2475	HCG	5	1	1	继发不孕	1.8	＞24	29.7	混合因素	4	6.33	1125	1.15	4	6.75	3.49	35.42	2	10	6.8	B	ICSI	2	0	2	0	0	0	0	否	否	全胚冷冻
1203	1	C00017025	高丽娜	≥35	37	2	降调节方案	3	335	≤10天	10	＞3000	3350	HCG	3	2	0	继发不孕	2.93	≤24	23.4	混合因素	4	3.26	1038	0.83	5	11.49	3.49	58	2	8	10.6	A	ICSI	2	0	1	0	1	1	0	否	是	移植	未妊娠
1369	1	2018040236	刘建梅	≥35	42	7	刺激方案	1	375	≤10天	7	≤3000	2625	HCG	5	1	1	继发不孕	2.7	＞24	29.7	男方因素	3	6.59	504	1.37	4	6.75	3.49	53	2	10	5.8	B	ICSI	3	0	2	0	0	0	0	否	否	全胚冷冻
1782	1	2016100126	刘建梅	≥35	40	3	拮抗剂方案	2	384.375	≤10天	8	＞3000	3075	HCG	5	1	1	继发不孕	1.97	＞24	29.7	混合因素	2	2.65	578	0.35	5	6.75	3.49	93	2	10	10.3	A	ICSI	2	0	2	0	0	0	0	否	否	全胚冷冻
1801	1	C00017325	阮氏小	≥35	37	1	刺激方案	1	300	≤10天	9	≤3000	2700	HCG	2	2	2	继发不孕	1.9	＞24	28	女方因素	2	15.41	538	0.82	2	13.64	3.49	21	2	5	0.61	A	IVF	2	0	2	0	0	0	0	否	否	全胚冷冻
52	0	C00010927	杨玲	＜35	22	1	降调节方案	3	195	≤10天	10	≤3000	1950	HCG	2	0	0	原发不孕	2.64	≤24	22	女方因素	9	0.62	2975	2.23	7	6.5	3.5	35	1	17	10.1	A	IVF	2	0	2	0	2	2	0	否	是	移植	已妊娠	临床妊娠	宫内妊娠	双胎宫内妊娠
212	0	C00013293	安姗	＜35	33	2	降调节方案	3	284.615	＞10天	13	＞3000	3700	HCG	4	0	0	原发不孕	2.85	＞24	26	混合因素	8	1.19	1763	0.97	9	8.91	3.5	16	1	18	11	A	ICSI	6	0	2	0	2	2	0	否	是	移植	已妊娠	临床妊娠	宫内妊娠	单胚胎停
214	0	2016120169	唐圆圆	＜35	32	3	降调节方案	3	155	≤10天	10	≤3000	1550	HCG	1	1	0	继发不孕	2.36	≤24	17.7	男方因素	8	0.77	1712	0.97	4	6.87	3.5	77	1	15	12.7	A	ICSI	3	0	0	0	0	0	0	是		无可移植胚胎
401	0	C00012466	安姗	＜35	33	1	拮抗剂方案	2	218.182	＞10天	11	≤3000	2400	HCG	4	0	0	原发不孕	2.92	≤24	23	女方因素	7	4.28	13.36	0.76	9	8.91	3.5	16	1	18	0.85	A	IVF	4	0	2	0	2	2	0	否	是	移植	未妊娠
512	0	C00012138	张凤娟	＜35	34	1	降调节方案	3	279.545	＞10天	11	＞3000	3075	HCG	3	4	2	继发不孕	1.23	≤24	22.3	女方因素	6	2.32	2338	0.86	5	6.72	3.5	35	1	20	12	A	IVF	3	0	1	0	0	0	0	否	否	全胚冷冻
1598	0	C00018865	于杨	＜35	34	3	拮抗剂方案	2	150	≤10天	7	≤3000	1050	HCG	3	1	0	继发不孕	1.5	≤24	20.5	女方因素	3	2.2	918	0.71	3	11	3.5	55	1	9	10	A-B	IVF	2	0	2	0	0	0	0	否	否	全胚冷冻
1652	1	C00016877	于杨	＜35	33	1	刺激方案	1	400	≤10天	9	＞3000	3600	HCG	3	1	0	继发不孕	1.43	≤24	20.5	女方因素	2	7.93	857	1.21	1	11	3.5	55	1	9	0.91	B	IVF	0	0	0	0	0	0	0	是		无可移植胚胎
650	1	2016050077	杨震	≥35	39	1	刺激方案	1	345	≤10天	10	＞3000	3450	HCG	1	3	1	继发不孕	1.31	＞24	27.3	女方因素	5	2.55	774	0.25	2	4.32	3.51	32.32	2	11	10.9	A-B	IVF	2	0	2	0	0	0	0	否	否	全胚冷冻
1414	1	2016080216	耿雪	＜35	27	3	刺激方案	1	369.231	＞10天	13	＞3000	4800	HCG	3	0	0	原发不孕	2.810	≤24	19	女方因素	3	2.28	855.16	0.91	6	7.32	3.51	36.43	1	8	14.8	A	IVF	2	0	2	1	2	2	0	否	是	移植	未妊娠
217	1	2016110019	李俊霞	≥35	45	1	刺激方案	1	300	≤10天	8	≤3000	2400	HCG	1	4	1	原发不孕	1.24	＞24	25.8	女方因素	8	3.44	1659	1.45	5	12.54	3.53	50	2	9	8.8	A	IVF	5	0	0	0	0	0	0	是		无可移植胚胎
676	1	2017060283	徐凡一	≥35	40	1	刺激方案	1	300	≤10天	9	≤3000	2700	HCG	1	2	1	继发不孕	1.2	≤24	23	女方因素	5	1.47	1838	1.01	4	6.03	3.53	80	2	7	10.3	B	IVF	4	0	2	1	0	0	0	否	否	全胚冷冻
1165	0	C00009648	韩金荣	＜35	34	1	拮抗剂方案	2	210	≤10天	10	≤3000	2100	HCG	6	0	0	原发不孕	3.08	≤24	22.8	女方因素	4	3.8	1202	0.48	3	6.98	3.53	34.9	1	10	13.1	A-B	IVF	3	0	2	0	2	2	0	否	是	移植	已妊娠	临床妊娠	宫内妊娠	单胚胎停
1258	0	2017070269	马青青	≥35	38	5	刺激方案	1	150	≤10天	7	≤3000	1050	HCG	2	1	0	继发不孕	2.06	≤24	19.2	女方因素	3	26.19	895	2.22	4	9.76	3.53	53	2	8	12.2	B	IVF	2	0	0	0	0	0	0	是		无可移植胚胎
363	1	C00011953	王秀秀	＜35	29	1	拮抗剂方案	2	381.25	＞10天	12	＞3000	4575	HCG	1	0	0	原发不孕	2.26	＞24	25.2	男方因素	7	7.69	1786	1.24	3	6.86	3.54	37.04	1	8	12.7	A	ICSI	2	0	1	0	0	0	0	否	否	全胚冷冻
1594	0	C00008436	张学丽	≥35	36	1	拮抗剂方案	2	150	≤10天	7	≤3000	1050	HCG	5	2	1	继发不孕	1.34	≤24	20.2	女方因素	3	1.09	1004	0.03	1	7.48	3.54	91	2	9	5.9	B	IVF	0	0	1	0	0	0	0	否	否	全胚冷冻
516	1	2018020058	姜金玲	≥35	43	3	降调节方案	3	425	＞10天	12	＞3000	5100	HCG	1	2	1	继发不孕	1.60	≤24	20.3	男方因素	6	10.5	2284	0.11	7	6.59	3.55	52.32	2	8	12.1	A	ICSI	4	0	2	1	2	2	0	否	是	移植	未妊娠
805	1	2016070167	王煜	≥35	41	2	刺激方案	1	300	≤10天	9	≤3000	2700	HCG	6	1	0	继发不孕	1.62	＞24	25.7	女方因素	3	0.86	970	3.16	8	9.79	3.55	26.43	2	10	7.6	B	IVF	7	0	6	1	0	0	0	否	否	全胚冷冻
111	1	2017030196	全芯	≥35	43	3	降调节方案	3	300	＞10天	14	＞3000	4200	HCG	2	2	0	继发不孕	2.56	≤24	21.4	混合因素	9	1.05	1777	0.6	8	9.78	3.56	40.4	2	11	14	A	ICSI	6	0	4	2	0	0	0	否	否	全胚冷冻
1367	1	C00014253	朱伟琴	＜35	33	1	拮抗剂方案	2	375	≤10天	5	≤3000	1875	HCG	2	3	1	继发不孕	1.5	＞24	26.4	女方因素	3	2.43	516	0.64	3	11.54	3.56	31	1	6	1.06	B	IVF	3	0	3	2	0	0	0	否	否	全胚冷冻
74	0	2018030186	钊月月	＜35	26	1	降调节方案	3	207.692	＞10天	13	≤3000	2700	HCG	3	0	0	原发不孕	3.34	≤24	22.2	女方因素	9	0.96	2411	0.88	7	5.92	3.57	53	1	14	14.6	A-B	IVF	6	0	2	2	2	2	0	否	是	移植	未妊娠
478	1	C00003631	钊月月	＜35	27	2	降调节方案	3	455.769	＞10天	13	＞3000	5925	HCG	3	0	0	原发不孕	4.6	≤24	22.2	女方因素	6	1.17	1746	0.95	7	5.92	3.57	34.04	1	14	13.6	A	IVF	6	0	2	1	2	2	0	否	是	移植	未妊娠
642	1	C00005363	张玮	＜35	33	1	拮抗剂方案	2	363.889	≤10天	9	＞3000	3275	HCG	6	0	0	原发不孕	1.98	＞24	30.1	女方因素	5	3.9	942	0.77	5	10.42	3.57	35	1	11	9.4	A	IVF	1	1	2	0	1	1	0	否	是	移植	已妊娠	临床妊娠	宫内妊娠	单胎宫内妊娠
671	1	C00009933	梁爱华	≥35	42	3	刺激方案	1	450	≤10天	9	＞3000	4050	HCG	1	2	1	继发不孕	1.47	＞24	25.7	混合因素	5	17.21	1879	1.79	6	12.4	3.57	55	2	9	0.7	A	ICSI	3	0	4	1	0	0	0	否	否	全胚冷冻
1725	1	C00012223	陈慧勤	＜35	31	2	刺激方案	1	360	≤10天	10	＞3000	3600	HCG	1	0	0	原发不孕	1.41	≤24	23.4	女方因素	2	3.52	701	0.11	1	6.79	3.57	38	1	7	13.7	B	IVF	0	0	0	0	0	0	0	是		无可移植胚胎
241	1	C00017836	温春晓	＜35	23	1	降调节方案	3	331.25	＞10天	12	＞3000	3975	HCG	2	0	0	原发不孕	4.34	＞24	27.7	混合因素	8	0.9	1014.96	1.02	7	9.02	3.58	35	1	13	11.8	A-B	ICSI	4	0	0	0	0	0	0	是		无可移植胚胎
154	0	C00015050	段玉杰	≥35	40	1	拮抗剂方案	2	285	≤10天	10	≤3000	2850	HCG	1	5	1	继发不孕	2.17	≤24	23.4	女方因素	8	3.11	1883	0.53	7	6.41	3.59	47	2	13	11	A-B	IVF	5	0	4	1	2	2	0	否	是	移植	已妊娠	生化妊娠	生化妊娠	生化妊娠
471	1	2017080054	杨玉男	≥35	37	1	降调节方案	3	313.333	＞10天	15	＞3000	4700	HCG	3	0	0	原发不孕	1.53	≤24	21.7	不明原因	6	1.51	1800	1.45	6	6.94	3.59	41	2	10	11	A-B	IVF	5	0	4	0	0	0	0	否	否	全胚冷冻
1942	0	2018030166	商玉镯	＜35	32	1	刺激方案	1	150	≤10天	7	≤3000	1050	HCG	4	0	0	原发不孕	1.39	≤24	21.6	女方因素	2	9.1	404	0.68	3	10.29	3.6	57	1	6	7.6	A-B	IVF	1	0	1	0	0	0	0	否	否	全胚冷冻
11	1	C00012621	白姗姗	＜35	30	1	拮抗剂方案	2	404.167	＞10天	12	＞3000	4850	HCG	3	0	0	原发不孕	2.87	≤24	22.8	男方因素	10	1.14	2821	1.11	8	3.12	3.61	27	1	12	11	B	ICSI	4	0	0	0	0	0	0	是		无可移植胚胎
229	0	C00016829	张艳	≥35	41	1	拮抗剂方案	2	280.556	≤10天	9	≤3000	2525	HCG	2	0	0	原发不孕	1.30	＞24	24.2	女方因素	8	2.82	1402	0.83	5	7.22	3.61	39.72	2	9	12.3	A-B	IVF	4	0	0	0	0	0	0	是		无可移植胚胎
235	1	C00018013	张艳	≥35	41	2	降调节方案	3	311.25	≤10天	10	＞3000	3112.5	HCG	2	0	0	原发不孕	1.80	＞24	24.2	女方因素	8	2.29	1204	0.49	7	7.22	3.61	39.72	2	11	12.1	B	IVF	6	0	2	0	0	0	0	否	否	全胚冷冻
313	1	C00017104	栗金霞	≥35	39	1	刺激方案	1	450	≤10天	9	＞3000	4050	HCG	2	3	0	继发不孕	3.01	＞24	27.2	女方因素	7	7.86	2232	1.26	7	6.13	3.61	52	2	12	6.3	A	IVF	7	0	4	1	0	0	0	否	否	全胚冷冻
909	1	C00015292	柳海华	≥35	39	2	拮抗剂方案	2	357.143	≤10天	7	≤3000	2500	HCG	4	5	1	继发不孕	2.82	≤24	22	女方因素	4	2.53	968	1.29	3	7.81	3.61	53	2	8	10.9	A-B	IVF	3	0	2	0	2	2	0	否	是	移植	未妊娠
449	1	C00010387	孟凡捷	≥35	36	1	刺激方案	1	450	＞10天	12	＞3000	5400	HCG	3	2	1	继发不孕	1.81	＞24	28.8	女方因素	6	3.71	1798	1.2	5	10.16	3.62	18	2	11	0.74	A-B	IVF	4	0	4	0	0	0	0	否	否	全胚冷冻
645	0	C00018845	董丽燕	≥35	39	2	拮抗剂方案	2	225	≤10天	8	≤3000	1800	HCG	3	5	1	继发不孕	1.84	＞24	26.4	女方因素	5	2.22	881.53	0.82	5	8.95	3.62	10.81	2	9	9.5	B	IVF	4	2	2	2	0	0	0	否	否	全胚冷冻
753	1	C00017437	董丽燕	≥35	39	1	刺激方案	1	450	≤10天	7	＞3000	3150	双扳机	3	5	1	继发不孕	1.88	＞24	26.4	女方因素	5	6.01	1371	0.91	4	8.95	3.62	10.81	2	9	0.7	B-C	IVF	4	1	1	1	0	0	0	否	否	全胚冷冻
373	0	C00015653	吴秀荣	≥35	42	1	拮抗剂方案	2	283.333	≤10天	9	≤3000	2550	HCG	1	5	0	继发不孕	1.33	≤24	24	女方因素	7	1.73	1651	0.64	7	9.62	3.63	43	2	9	10.9	A	IVF	1	0	0	0	0	0	0	是		无可移植胚胎
903	1	C00018578	乔立娜	≥35	37	2	刺激方案	1	450	≤10天	10	＞3000	4500	HCG	2	1	1	继发不孕	4.11	＞24	25.7	女方因素	5	1.54	1244	0.56	8	9.67	3.63	28.02	2	13	5.4	B	IVF	4	1	3	0	0	0	0	否	否	全胚冷冻
920	0	C00013019	王立	≥35	39	1	刺激方案	1	225	≤10天	8	≤3000	1800	HCG	3	4	1	继发不孕	1.42	≤24	22.3	女方因素	4	3.32	934	0.48	1	9.62	3.63	43	2	11	0.97	A-B	IVF	0	0	0	0	0	0	0	是		无可移植胚胎
1239	0	2016120004	孙海霞	＜35	30	2	刺激方案	1	225	≤10天	9	≤3000	2025	HCG	5	0	0	原发不孕	1.56	≤24	22	男方因素	3	1.48	941	0.82	2	9.18	3.63	35.42	1	6	11.3	B	ICSI	0	0	0	0	0	0	0	是		无可移植胚胎
1670	1	C00018482	吴秀荣	≥35	42	2	拮抗剂方案	2	330	≤10天	10	＞3000	3300	HCG	2	5	0	继发不孕	1.38	≤24	24	男方因素	2	1.51	827.29	0.26	3	9.62	3.63	43	2	9	7.6	A-B	ICSI	1	0	2	0	2	2	0	否	是	移植	未妊娠
1957	0	2016040278	孙海霞	＜35	30	1	降调节方案	3	225	≤10天	6	≤3000	1350	HCG	5	0	0	原发不孕	1.89	≤24	22	女方因素	2	1.69	490	1.27	3	9.18	3.63	35.42	1	6	10.5	A-B	IVF	0	0	0	0	0	0	0	是		未受精
816	0	2016030183	张淑华	＜35	30	1	降调节方案	3	239.423	＞10天	13	＞3000	3112.5	HCG	2	0	0	原发不孕	1.29	≤24	20.3	不明原因	5	3.58	1528	0.92	6	8.24	3.64	72	1	9	11.5	A	IVF	5	0	3	2	2	2	0	否	是	移植	未妊娠
325	0	C00012919	段瑜	＜35	30	2	拮抗剂方案	2	256.25	≤10天	8	≤3000	2050	HCG	3	0	0	原发不孕	3.76	≤24	19.1	男方因素	7	4.61	2129	1.12	7	6.95	3.65	39	1	12	11.5	A	ICSI	4	0	2	0	2	2	0	否	是	移植	已妊娠	临床妊娠	宫内妊娠	单胎宫内妊娠
1206	0	2018060129	昃青	≥35	36	1	降调节方案	3	200	≤10天	10	≤3000	2000	HCG	1	0	0	原发不孕	1.37	＞24	27.3	女方因素	4	1.63	1016	1.08	5	5.35	3.65	57	2	12	1.08	A	IVF	1	0	1	0	1	1	0	否	是	移植	已妊娠	临床妊娠	宫内妊娠	单胎宫内妊娠
1519	0	C00011695	段瑜	＜35	30	1	拮抗剂方案	2	262.5	≤10天	8	≤3000	2100	HCG	3	0	0	原发不孕	1.86	＞24	25	女方因素	3	7.77	844.63	0.94	3	6.95	3.65	39	1	9	0.9	A	IVF	0	0	0	0	0	0	0	否	否	全胚冷冻
1580	0	C00015049	任玉翠	≥35	41	1	拮抗剂方案	2	241.667	≤10天	9	≤3000	2175	HCG	4	2	1	继发不孕	1.77	＞24	27.6	混合因素	3	17.85	1048	1.32		12.93	3.65	38	2	7	12.4	C		0	0	0	0	0	0	0	是		未取卵
133	0	2017030203	黄玲玲	＜35	26	1	降调节方案	3	156.25	＞10天	12	≤3000	1875	HCG	1	4	0	继发不孕	2.27	≤24	20	女方因素	8	1.07	1690	0.97	9	6.52	3.66	44	1	18	8.3	B	IVF	6	0	4	1	2	2	0	否	是	移植	已妊娠	临床妊娠	宫内妊娠	双胎宫内妊娠
250	0	2017020052	蒋茜玺	＜35	27	1	降调节方案	3	231.25	＞10天	12	≤3000	2775	HCG	2	0	0	原发不孕	2.91	≤24	20.7	女方因素	7	2.59	1774	0.51	4	14.52	3.66	44	1	15	17.1	A	IVF	4	0	0	0	0	0	0	是		无可移植胚胎
863	0	C00006766	牛永香	≥35	36	2	降调节方案	3	286.765	＞10天	17	＞3000	4875	HCG	5	4	1	继发不孕	2.36	≤24	22.3	女方因素	5	1.54	1244	0.56	6	7.15	3.66	40.21	2	9	13.7	A	IVF	4	0	2	0	2	2	0	否	是	移植	未妊娠
1600	1	C00008195	汪芳	＜35	31	1	刺激方案	1	375	≤10天	10	＞3000	3750	HCG	2	1	0	继发不孕	1.78	≤24	19	男方因素	3	5.67	912	0.79	2	7.24	3.66	26	1	7	4.1	A	ICSI	1	0	1	1	0	0	0	否	否	全胚冷冻
1716	0	C00010950	牛芳	＜35	33	2	拮抗剂方案	2	225	≤10天	8	≤3000	1800	HCG	1	1	0	继发不孕	2.6	＞24	25.6	男方因素	2	1.12	718	0.4	4	7.72	3.66	36	1	8	9.2	A	IVF	3	0	1	0	1	1	0	否	是	移植	未妊娠
1793	1	C00018263	孙萍萍	≥35	39	1	拮抗剂方案	2	360.714	≤10天	7	≤3000	2525	HCG	5	1	1	继发不孕	1.77	＞24	28.2	混合因素	2	8.59	552.88	0.63	2	7.9	3.66	87.26	2	6	8.4	A	ICSI	1	0	0	0	0	0	0	是		无可移植胚胎
803	0	2017090068	曹薇	≥35	37	1	降调节方案	3	225	≤10天	9	≤3000	2025	HCG	3	2	1	继发不孕	1.53	＞24	24.7	混合因素	5	3.19	1610	0.84	6	8.96	3.67	25.7	2	18	12.3	A	ICSI	5	0	3	1	0	0	0	否	否	全胚冷冻
1407	1	C00016184	李九荣	≥35	40	2	刺激方案	1	300	≤10天	8	≤3000	2400	HCG	8	3	1	继发不孕	1.57	≤24	22.5	女方因素	3	8.77	869	1.78	4	6.9	3.67	42.91	2	6	8.5	B	IVF	2	0	0	0	0	0	0	是		无可移植胚胎
1879	1	2016060184	崔自娟	≥35	37	1	降调节方案	3	325	≤10天	9	≤3000	2925	HCG	3	3	1	继发不孕	3.18	≤24	23	女方因素	2	0.69	283	2.24	1	6.76	3.67	30	2	7	8.8	A	IVF	0	0	0	0	0	0	0	是		无可移植胚胎
2145	1	2018050032	岳艳辉	≥35	42	1	降调节方案	3	350	≤10天	9	＞3000	3150	HCG	2	2	2	继发不孕	1.37	≤24	21.4	混合因素	9	1.81	1781	1.02	9	8.13	3.67	40.1	2	12	8.4		ICSI	9	0	3	0	0	0	0	否	否	全胚冷冻
409	0	2017090025	任惠惠	＜35	30	1	降调节方案	3	246.154	＞10天	13	＞3000	3200	HCG	3	1	0	继发不孕	2.31	＞24	24.5	女方因素	7	1.39	1234	0.85	7	7.8	3.68	35.23	1	16	10.7	A	IVF	5	0	2	0	2	2	0	否	是	移植	已妊娠	临床妊娠	宫内妊娠	单胎宫内妊娠
563	0	2018030250	杨燕	＜35	33	2	刺激方案	1	225	≤10天	8	≤3000	1800	HCG	3	1	0	继发不孕	1.6	≤24	17.7	男方因素	6	11.82	1814	1.6	7	8.79	3.68	72	1	10	4.4	A	IVF	7	0	2	1	0	0	0	否	否	全胚冷冻
705	0	2017060004	杨燕	＜35	32	1	刺激方案	1	283.333	≤10天	9	≤3000	2550	HCG	3	1	0	继发不孕	1.72	≤24	17.7	女方因素	5	11.49	1668.44	1.67	4	8.79	3.68	72	1	10	5.1	A	IVF	3	0	2	0	0	0	0	否	否	全胚冷冻
736	1	C00003412	曾凡华	≥35	39	1	降调节方案	3	300	＞10天	11	＞3000	3300	HCG	1	3	1	继发不孕	1.42	≤24	23.2	女方因素	5	1.66	1469	0.51	8	8.05	3.69	44	2	13	11.8	A-B	IVF	1	0	1	0	1	1	0	否	是	移植	未妊娠
763	1	2016030276	卜淑娟	≥35	35	4	降调节方案	3	305.357	＞10天	14	＞3000	4275	HCG	5	3	0	继发不孕	2.20	≤24	16.4	女方因素	5	1.17	1863	2.13	3	9.65	3.69	38.08	2	7	10.7	A	IVF	3	1	1	0	0	0	0	否	否	全胚冷冻
769	0	2016110215	王萌	＜35	28	1	刺激方案	1	225	≤10天	9	≤3000	2025	HCG	3	0	0	继发不孕	2.29	≤24	17.7	女方因素	5	2.13	1806	3.87	6	12.34	3.69	52	1	8	11.2	A	IVF	5	0	0	0	0	0	0	是		无可移植胚胎
1930	0	C00012659	董丽丽	≥35	35	1	刺激方案	1	187.5	≤10天	8	≤3000	1500	HCG	5	1	0	继发不孕	2.17	≤24	22.5	女方因素	2	23	451	1.38	2	8.05	3.69	44	2	6	6.3	B	IVF	2	0	2	1	0	0	0	否	否	全胚冷冻
639	0	C00012644	李明娟	≥35	36	1	刺激方案	1	200	＞10天	12	≤3000	2400	HCG	8	2	1	继发不孕	1.69	＞24	34.3	女方因素	6	0.81	1161	0.56	4	5.8	3.7	18.86	2	11	1.1	A	IVF	0	1	1	0	0	0	0	否	否	全胚冷冻
894	1	C00018469	舒丽	≥35	39	3	拮抗剂方案	2	300	≤10天	9	≤3000	2700	HCG	2	1	0	继发不孕	2.42	≤24	23.1	混合因素	5	0.96	1054	1.13	7	15.61	3.7	27.5	2	11	8.7	A	ICSI	6	0	4	1	2	2	0	否	是	移植	已妊娠	临床妊娠	宫内妊娠	单胎宫内妊娠
178	0	C00016567	张凤红	≥35	42	2	降调节方案	3	240	≤10天	10	≤3000	2400	HCG	7	3	1	继发不孕	1.57	＞24	24.6	女方因素	8	2.88	2345	0.86	6	6.51	3.71	47	2	20	13.2	A	IVF	4	1	2	1	1	1	0	否	是	移植	未妊娠
252	0	2016050253	史长红	≥35	40	1	拮抗剂方案	2	240.625	≤10天	8	≤3000	1925	HCG	1	3	1	继发不孕	1.68	≤24	23.6	女方因素	4	10.4	812	0.67	6	6.98	3.71	47.71	2	10	7.7	A	IVF	6	0	4	2	2	2	0	否	是	移植	已妊娠	临床妊娠	宫内妊娠	单胚胎停
653	1	2016020100	韩燕子	＜35	32	1	刺激方案	1	346.154	＞10天	13	＞3000	4500	HCG	1	1	0	继发不孕	1.734	＞24	33.5	女方因素	5	3.27	750	0.49	3	10.75	3.71	28	1	7	16.3	B	IVF	2	0	1	1	0	0	0	否	否	全胚冷冻
822	0	C00015497	王娟	≥35	41	1	拮抗剂方案	2	210	≤10天	10	≤3000	2100	HCG	3	1	1	继发不孕	1.9	≤24	19.5	男方因素	5	3.94	1478	1.04	4	7.01	3.71	50	2	9	9.7	A	IVF	2	1	3	2	2	2	0	否	是	移植	已妊娠	临床妊娠	宫内妊娠	单胚胎停
842	1	C00006569	范翔雪	＜35	32	1	降调节方案	3	444.643	＞10天	14	＞3000	6225	HCG	4	0	0	原发不孕	1.72	≤24	19.3	女方因素	5	2.6	1369	0.55	5	8.84	3.71	36	1	12	1.45	B	IVF	2	0	1	0	1	1	0	否	是	移植	未妊娠
8	0	2017070128	王孟艳	＜35	27	1	降调节方案	3	173.077	＞10天	13	≤3000	2250	HCG	3	1	0	继发不孕	3.56	≤24	20.3	女方因素	10	0.58	2008	0.85	5	7.55	3.72	49.09	1	14	15.3	A-B	IVF	2	0	2	0	0	0	0	否	否	全胚冷冻
384	0	2017020093	张建春	≥35	39	1	降调节方案	3	183.333	≤10天	9	≤3000	1650	HCG	2	1	0	继发不孕	1.53	≤24	21	女方因素	7	3.7	1579	0.14	8	7.42	3.72	65.69	2	10	13.2	A-B	IVF	4	0	3	1	1	1	0	否	是	移植	已妊娠	临床妊娠	宫内妊娠	单胎宫内妊娠
510	1	2017040139	赵宝军	≥35	41	2	刺激方案	1	375	≤10天	9	＞3000	3375	HCG	4	1	1	继发不孕	1.45	≤24	23.3	混合因素	6	3.59	2369	0.57	9	10.42	3.74	40	2	9	13.4	B	ICSI	2	0	1	0	1	1	0	否	是	移植	未妊娠
1538	0	C00016856	张俊丽	＜35	33	1	拮抗剂方案	2	200	≤10天	8	≤3000	1600	HCG	1	3	2	继发不孕	2.06	≤24	23.4	女方因素	3	5.67	1188	0.79	3	8.57	3.74	49	1	9	1.07	A	IVF	2	1	3	0	2	2	0	否	是	移植	未妊娠
1901	1	2017060014	王爱美	≥35	41	1	拮抗剂方案	2	358.333	≤10天	9	＞3000	3225	HCG	2	2	1	继发不孕	1.89	≤24	23.4	男方因素	4	2.85	917	1.01	5	10.31	3.74	68.08	2	9	10.8	A-B	ICSI	3	0	3	3	2	2	0	否	是	移植	未妊娠
2226	1	2017030310	池汶娟	≥35	35	1	降调节方案	3	325	＞10天	12	＞3000	3900	HCG	1	2	1	继发不孕	1.3	≤24	23.4	混合因素	1	9.77	175	3.67	0	8.6	3.75	59.09	2	8	11	A		0	0	0	0	0	0	0	是		未取到卵
625	1	C00014350	赵同芳	≥35	38	1	刺激方案	1	309.375	≤10天	8	≤3000	2475	HCG	8	1	1	继发不孕	4.45	＞24	31.3	男方因素	6	2.47	1184	0.75	7	4.1	3.77	89.87	2	11	0.9	B	ICSI	4	0	2	0	2	2	0	否	是	移植	未妊娠
986	0	2017060275	王美荣	≥35	43	1	拮抗剂方案	2	203.125	≤10天	8	≤3000	1625	HCG	2	2	2	继发不孕	1.54	≤24	22.3	女方因素	4	3	1335	0.48	9	7.54	3.78	59.86	2	9	16.3	A	IVF	4	0	2	0	0	0	0	否	否	全胚冷冻
994	1	C00011927	郭黎丽	≥35	43	1	拮抗剂方案	2	391.667	≤10天	9	＞3000	3525	HCG	2	1	1	继发不孕	1.86	＞24	25.4	女方因素	4	2.86	1304	0.97	5	8.58	3.78	65	2	12	0.83	A	IVF	4	0	2	1	1	1	0	否	是	移植	未妊娠
1082	0	2018020044	曹月红	＜35	31	1	刺激方案	1	150	≤10天	7	≤3000	1050	HCG	1	1	0	继发不孕	1.41	≤24	24	女方因素	4	7.85	1533	0.55	4	7.12	3.79	35	1	7	8.2	A	IVF	3	0	2	0	0	0	0	否	否	全胚冷冻
124	0	C00015536	肖娜娜	＜35	31	1	降调节方案	3	225	≤10天	9	≤3000	2025	HCG	2	0	0	原发不孕	3.11	≤24	22.8	女方因素	8	0.19	1996	1.03	9	5.86	3.8	53	1	14	1.14	A-B	IVF	2	0	2	0	2	2	0	否	是	移植	未妊娠
375	0	C00017756	刘春娥	≥35	42	1	刺激方案	1	288.462	＞10天	13	＞3000	3750	HCG	1	2	1	继发不孕	2.66	＞24	27.3	混合因素	7	6.75	1618	0.31	7	9.49	3.8	35	2	10	6.3	A-B	ICSI	2	0	2	0	0	0	0	否	否	全胚冷冻
477	1	C00012360	西翠翠	≥35	37	1	拮抗剂方案	2	321.154	＞10天	13	＞3000	4175	双扳机	1	5	1	继发不孕	1.70	≤24	23.9	女方因素	6	4.53	1761	0.96	6	7.19	3.81	32.5	2	11	15.1	A-B	IVF	5	0	2	0	0	0	0	否	否	全胚冷冻
604	1	2018050216	孟令华	＜35	32	2	刺激方案	1	337.5	≤10天	10	＞3000	3375	HCG	1	3	1	继发不孕	1.95	≤24	21.7	不明原因	6	10.87	1465	1.1	4	8.45	3.81	56.76	1	11	6.8	B	IVF	3	0	2	0	0	0	0	否	否	全胚冷冻
967	0	2017080091	孟令华	＜35	32	1	刺激方案	1	247.5	≤10天	10	≤3000	2475	HCG	4	2	1	继发不孕	2.89	≤24	21.7	女方因素	4	9.4	1392	0.8	6	8.45	3.81	56.76	1	11	7.8	B	IVF	3	0	2	2	0	0	0	否	否	全胚冷冻
1533	1	C00017954	盖倩楠	＜35	27	1	刺激方案	1	365	＞10天	15	＞3000	5475	HCG	2	2	0	继发不孕	3.79	≤24	19.5	女方因素	3	21.58	1222.45	1.74	2	17	3.81	12	1	12			IVF	1	0	0	0	0	0	0	是		无可移植胚胎
945	0	C00018418	梁爽	＜35	32	2	降调节方案	3	273.214	＞10天	14	＞3000	3825	HCG	2	0	0	原发不孕	1.390	＞24	25.8	女方因素	4	9.07	743.71	0.82	3	7.24	3.82	25.4	1	11	11.4	A-B	IVF	1	0	1	0	1	1	0	否	是	移植	已妊娠	临床妊娠	宫内妊娠	单胎宫内妊娠
1264	1	2017040181	李平	≥35	35	3	降调节方案	3	314.062	＞10天	16	＞3000	5025	HCG	5	0	0	原发不孕	1.63	＞24	25.9	男方因素	3	16.5	883	0.8	3	10.39	3.82	56.76	2	7	14.7	A-B	ICSI	5	0	4	0	0	0	0	否	否	全胚冷冻
1359	1	C00017097	梁爽	＜35	32	1	降调节方案	3	313.333	＞10天	15	＞3000	4700	HCG	2	0	0	原发不孕	2.84	＞24	25.8	女方因素	3	0.83	551	0.83	1	7.24	3.82	25.4	1	11	15.3	A-B	IVF	1	0	0	0	0	0	0	是		无可移植胚胎
1616	1	2016070060	苏桂华	≥35	41	4	拮抗剂方案	2	300	≤10天	9	≤3000	2700	HCG	1	1	1	继发不孕	2.26	≤24	18.9	女方因素	2	0.95	961	0.26	2	10.67	3.82	39.09	2	5	9.4	B	IVF	2	0	2	0	0	0	0	否	否	全胚冷冻
245	1	C00004623	牌树珍	≥35	37	2	刺激方案	1	375	≤10天	10	＞3000	3750	HCG	3	2	1	继发不孕	1.81	≤24	21.6	混合因素	7	6.76	1920	3.05	7	7.11	3.83	70.1	2	10	4.1	A	ICSI	6	0	4	2	0	0	0	否	否	全胚冷冻
756	1	2017090026	牌树珍	≥35	36	1	刺激方案	1	375	＞10天	11	＞3000	4125	HCG	3	0	0	继发不孕	2.68	≤24	21.6	混合因素	5	5.85	1362	2.13	5	7.11	3.83	80.1	2	10	6	A	ICSI	1	0	1	0	0	0	0	否	否	全胚冷冻
503	1	C00012113	赵薇	≥35	39	1	刺激方案	1	300	≤10天	10	≤3000	3000	HCG	3	1	0	继发不孕	1.2	≤24	20.4	女方因素	6	9.92	2446	1.92	4	6.46	3.84	70.27	2	8	1.06	A-B	IVF	4	0	3	0	0	0	0	否	否	全胚冷冻
527	0	C00016345	朱玉婷	＜35	26	1	降调节方案	3	198.75	＞10天	20	＞3000	3975	HCG	3	0	0	原发不孕	2.47	＞24	24.3	女方因素	6	2.46	2170	0.97	5	12.28	3.84	39	1	12	12.7	A	IVF	0	0	0	0	0	0	0	是		无可移植胚胎
636	1	2017100111	崔静丹	≥35	37	1	降调节方案	3	301.923	＞10天	13	＞3000	3925	HCG	1	4	3	继发不孕	2.03	≤24	21.5	男方因素	6	0.62	1268	1.1	5	8.23	3.84	36.43	2	11			IVF	3	0	2	0	2	2	0	否	是	移植	未妊娠
296	0	C00017434	尹凤英	＜35	24	1	拮抗剂方案	2	270	≤10天	10	≤3000	2700	HCG	3	0	0	原发不孕	3.41	＞24	24.2	男方因素	7	2.48	2705	2.55	8	7.41	3.86	30	1	12	1.16	A	ICSI	4	0	4	1	0	0	0	否	否	全胚冷冻
758	1	2016080189	石美英	≥35	37	1	刺激方案	1	418.75	＞10天	12	＞3000	5025	HCG	1	1	1	继发不孕	1.43	≤24	22.3	女方因素	5	0.58	1346	0.45	6	9.48	3.86	67.09	2	8	8.6	A-B	IVF	3	0	2	0	0	0	0	否	否	全胚冷冻
1098	0	2018030198	郭英霞	≥35	42	5	拮抗剂方案	2	238.636	＞10天	11	≤3000	2625	双扳机	1	2	1	继发不孕	1.24	＞24	30.8	女方因素	4	3.13	1454	1.06	4	11.75	3.86	16	2	7	7.2	B	IVF	4	0	2	0	2	2	0	否	是	移植	未妊娠
1319	1	2017030254	王娜	≥35	35	1	降调节方案	3	425	≤10天	7	≤3000	2975	HCG	3	0	0	原发不孕	1.43	＞24	25.8	混合因素	3	9.35	703	1.03	3	8.59	3.86	34.56	2	8	8.9	A	ICSI	2	0	1	0	0	0	0	否	否	全胚冷冻
2114	0	2017120007	郭英霞	≥35	41	4	刺激方案	1	225	≤10天	8	≤3000	1800	HCG	1	2	1	继发不孕	1.24	＞24	30.8	女方因素	1	11.11	448	0.49	2	11.75	3.86	16	2	7	7.6	A	IVF	2	0	1	0	0	0	0	否	否	全胚冷冻
2118	0	2017110031	郭英霞	≥35	41	3	刺激方案	1	150	≤10天	7	≤3000	1050	HCG	1	2	1	继发不孕	1.24	＞24	30.8	混合因素	1	10.92	441	0.36	0	11.75	3.86	16	2	7	7.1	A		0	0	0	0	0	0	0	是		未取到卵
295	0	2017070003	孙萍萍	＜35	33	2	刺激方案	1	225	≤10天	8	≤3000	1800	HCG	2	0	0	原发不孕	3.89	≤24	18.3	女方因素	7	7.72	2709	1.95	7	8.67	3.88	76.43	1	11	6.1	B	IVF	4	0	3	2	0	0	0	否	否	全胚冷冻
423	1	2018040247	王新芳	≥35	44	1	拮抗剂方案	2	392.857	≤10天	7	≤3000	2750	HCG	1	3	1	原发不孕	1.94	≤24	20.8	混合因素	7	4.69	1082	1.68	4	6.95	3.88	43	2	7	10.4	A	ICSI	3	0	2	0	2	2	0	否	是	移植	未妊娠
2026	1	C00018551	孙维谦	＜35	34	1	拮抗剂方案	2	336.111	≤10天	9	＞3000	3025	HCG	3	0	0	原发不孕	3.29	≤24	19	男方因素	1	1	732.18	0.57	4	4.67	3.88	46.81	1	10	8.5	A	ICSI	3	0	2	0	2	2	0	否	是	移植	未妊娠
1428	1	C00017189	梁冬妍	≥35	42	1	拮抗剂方案	2	290.625	≤10天	8	≤3000	2325	HCG	18	1	0	继发不孕	1.83	≤24	21.3	混合因素	3	1.74	965	0.97	7	7.42	3.89	36	2	9	13.7	A-B	ICSI	4	0	2	2	2	2	0	否	是	移植	未妊娠
911	1	C00011908	杨玉奇	＜35	33	3	拮抗剂方案	2	322.5	≤10天	10	＞3000	3225	HCG	5	2	1	继发不孕	1.37	≤24	22	男方因素	4	4.21	961	0.6	5	15.18	3.9	37	1	7	9	A	ICSI	4	0	2	1	2	2	0	否	是	移植	已妊娠	临床妊娠	宫内妊娠	单胚胎停
1091	1	C00006423	叶丽杰	≥35	37	1	降调节方案	3	384.615	＞10天	13	＞3000	5000	HCG	8	0	0	原发不孕	2.54	＞24	24.3	女方因素	4	0.44	1476	0.97	5	5.52	3.9	72	2	11	9.2	A	IVF	3	1	2	0	0	0	0	否	否	全胚冷冻
424	1	2016010047	刘明芝	＜35	28	1	刺激方案	1	357.692	＞10天	13	＞3000	4650	HCG	4	0	0	原发不孕	2.94	＞24	35.5	女方因素	7	0.47	1067	0.58	8	6.47	3.91	50.1	1	10	10.5	B	IVF	4	0	2	1	2	2	0	否	是	移植	未妊娠
740	1	2016110228	刘明芝	＜35	29	3	刺激方案	1	328.571	＞10天	21	＞3000	6900	HCG	4	0	0	原发不孕	1.26	＞24	35.5	男方因素	5	3.54	1445	0.86	6	6.47	3.91	50.1	1	10	8.8	B	ICSI	1	0	0	0	0	0	0	是		无可移植胚胎
144	1	C00004092	赵淑兰	≥35	39	1	降调节方案	3	300	＞10天	11	＞3000	3300	HCG	1	4	2	继发不孕	2.30	＞24	24.8	女方因素	8	2.12	2208	1.82	9	8.2	3.94	38.2	2	12	10.3	A	IVF	6	1	3	2	1	1	0	否	是	移植	已妊娠	临床妊娠	宫内妊娠	单胎宫内妊娠
798	0	C00017802	张天惠	＜35	26	2	拮抗剂方案	2	251.25	≤10天	10	≤3000	2512.5	HCG	3	0	0	原发不孕	3.03	≤24	23	女方因素	5	2.28	1641	0.86	6	7.55	3.94	22	1	12	1.07	A	IVF	2	2	4	0	0	0	0	否	否	全胚冷冻
826	0	2017090202	吴磊	≥35	35	1	降调节方案	3	150	＞10天	11	≤3000	1650	HCG	3	0	0	原发不孕	2.24	＞24	24.4	女方因素	10	3.06	2204	0.8	9	8.26	3.94	49.09	2	13	13	A	IVF	8	0	7	3	2	2	0	否	是	移植	已妊娠	临床妊娠	宫内妊娠	双胎宫内妊娠
1275	1	C00012424	付琳	＜35	31	1	降调节方案	3	300	＞10天	11	＞3000	3300	HCG	6	0	0	原发不孕	1.93	≤24	22.2	女方因素	3	1.37	856	0.14	3	5.02	3.94	31.38	1	7	11.4	A	IVF	1	0	1	1	1	1	0	否	是	移植	未妊娠
583	0	C00009722	张媛媛	≥35	35	1	拮抗剂方案	2	208.333	≤10天	9	≤3000	1875	HCG	2	0	0	继发不孕	1.51	≤24	23.4	女方因素	6	1.46	1621	0.78	6	7.14	3.95	43	2	9	12.1	A	IVF	4	0	2	0	2	2	0	否	是	移植	未妊娠
613	1	C00018744	尚晓丽	≥35	42	2	刺激方案	1	325	≤10天	10	＞3000	3250	HCG	2	1	0	继发不孕	2.8	＞24	24.5	男方因素	6	1.98	1351.1	0.99	6	5.34	3.95	49.77	2	11	13	B	ICSI	5	1	3	1	0	0	0	否	否	全胚冷冻
766	0	C00011906	邵玲	＜35	33	1	降调节方案	3	218.75	＞10天	12	≤3000	2625	HCG	1	0	0	原发不孕	2.3	≤24	20.6	女方因素	5	3.09	1821	0.39	4	7.14	3.95	43	1	12	1.1	A	IVF	1	0	1	1	1	1	0	否	是	移植	已妊娠	临床妊娠	宫内妊娠	单胎宫内妊娠
1690	1	2018060023	郝海芳	≥35	35	1	降调节方案	3	300	≤10天	9	≤3000	2700	HCG	3	2	1	继发不孕	2.32	≤24	20	女方因素	2	6.09	772	0.91	2	6.92	3.95	56.43	2	9	13	A	IVF	1	0	1	1	1	1	0	否	是	移植	未妊娠
1707	1	C00015482	尚晓丽	≥35	42	1	拮抗剂方案	2	364.286	≤10天	7	≤3000	2550	HCG	2	1	0	继发不孕	1.80	＞24	24.5	女方因素	2	3.7	736.86	0.23	3	5.34	3.95	49.77	2	11	11.8	B	IVF	0	0	0	0	0	0	0	是		无可移植胚胎
2092	1	C00004129	郝海芳	≥35	36	2	刺激方案	1	450	≤10天	6	≤3000	2700	双扳机	3	2	1	继发不孕	2.25	≤24	20	女方因素	1	12.79	486	0.95	1	11.92	3.95	46.43	2	9	0.6	A	IVF	1	0	0	0	0	0	0	是		无可移植胚胎
1018	0	C00011733	汪芳	＜35	32	4	刺激方案	1	285	≤10天	10	≤3000	2850	HCG	2	1	0	继发不孕	1.83	≤24	19	男方因素	4	15.24	1198	2.06	2	8.24	3.97	35.85	1	7	0.52	A-B	ICSI	1	0	0	0	0	0	0	是		无可移植胚胎
1140	1	C00009250	汪芳	＜35	31	2	刺激方案	1	425	＞10天	15	＞3000	6375	HCG	2	1	0	继发不孕	2.47	≤24	19	男方因素	4	3.97	1308	0.82	4	8.24	3.97	35.85	1	7	10	A	ICSI	4	0	4	0	0	0	0	否	否	全胚冷冻
1198	1	C00018857	汪芳	＜35	33	5	拮抗剂方案	2	360	≤10天	10	＞3000	3600	HCG	2	1	0	继发不孕	2.53	≤24	19	男方因素	4	1.67	1061.94	1.33	5	8.24	3.97	35.85	1	7	12	A	ICSI	3	0	1	0	0	0	0	否	否	全胚冷冻
657	1	2017070205	陈天红	＜35	30	1	降调节方案	3	294.231	＞10天	13	＞3000	3825	HCG	5	0	0	原发不孕	3.08	≤24	17.2	混合因素	5	1.94	1559	1.05	6	11.27	3.98	48	1	13	9.2	A	ICSI	5	0	4	2	2	2	0	否	是	移植	未妊娠
785	1	2017030039	林秀梅	≥35	42	1	刺激方案	1	375	≤10天	8	≤3000	3000	HCG	3	1	1	继发不孕	1.76	≤24	23.8	混合因素	5	2	1724	0.68	5	9.2	3.98	40	2	6	8.6	B	ICSI	3	0	3	1	2	2	0	否	是	移植	未妊娠
1363	1	C00019175	王艳	≥35	36	2	拮抗剂方案	2	400	≤10天	9	＞3000	3600	HCG	3	0	0	原发不孕	1.8	＞24	26	混合因素	3	3.17	534.33	0.4	2	7.15	3.98	39.09	2	7	11.2	A	ICSI	1	0	1	0	1	1	0	否	是	移植	未妊娠
1555	1	2016120216	孙敏	＜35	33	1	刺激方案	1	375	≤10天	8	≤3000	3000	HCG	3	1	0	继发不孕	1.28	≤24	19.4	女方因素	3	2.64	1147	1.04	3	10.2	3.98	40	1	6	11.4	A	IVF	1	0	0	0	0	0	0	是		无可移植胚胎
1520	0	2017040056	李世珍	＜35	31	2	降调节方案	3	265.385	＞10天	13	＞3000	3450	HCG	2	1	1	继发不孕	3.16	≤24	23.8	男方因素	3	1.56	836.18	0.47	7	8.11	3.99	42	1	17	16.3	A	ICSI	5	0	4	0	0	0	0	否	否	全胚冷冻
103	0	C00015058	彭春燕	＜35	32	1	拮抗剂方案	2	218.75	＞10天	12	≤3000	2625	双扳机	1	1	1	继发不孕	3.1	＞24	30.9	女方因素	9	1.04	1879	0.69	8	4.77	4	56	1	38	9.5	B	IVF	7	0	2	0	2	2	0	否	是	移植	未妊娠
652	1	C00012317	杜蕾蕾	＜35	29	2	降调节方案	3	412.5	≤10天	10	＞3000	4125	HCG	6	0	0	原发不孕	2.54	≤24	16.8	混合因素	5	1.32	753	1.06	4	10.95	4	48	1	7	1.24	A	ICSI	1	0	1	1	1	1	0	否	是	移植	未妊娠
62	0	2018070145	焦贵玲	≥35	36	1	降调节方案	3	286.364	＞10天	11	＞3000	3150	HCG	4	2	1	继发不孕	2.77	＞24	24.2	女方因素	9	1.96	2661	1.18	8	10.72	4.01	41.75	2	14	11.5	A	IVF	4	1	3	0	2	2	0	否	是	移植	已妊娠	临床妊娠	宫内妊娠	单胎宫内妊娠
185	0	2017050020	郝玉华	＜35	32	3	降调节方案	3	238.636	＞10天	11	≤3000	2625	HCG	2	0	0	原发不孕	2.29	＞24	24.7	男方因素	8	1.39	2232	0.54	9	6.94	4.01	29	1	24	12.8	A	ICSI	8	0	2	0	0	0	0	否	否	全胚冷冻
493	0	C00005237	许桂莹	＜35	33	2	降调节方案	3	247.5	≤10天	10	≤3000	2475	HCG	1	0	0	原发不孕	2.95	＞24	27.7	女方因素	6	1.27	2536	1.07	8	5.68	4.01	60	1	20	12.1	A	IVF	6	0	3	0	2	2	0	否	是	移植	已妊娠	临床妊娠	宫内妊娠	双胎宫内妊娠
853	1	2017120018	王婷婷	＜35	32	1	刺激方案	1	300	＞10天	12	＞3000	3600	HCG	1	3	0	继发不孕	1.72	≤24	22.9	女方因素	5	2.69	1294	0.47	2	7.16	4.01	65.69	1	8	10	A-B	IVF	1	0	1	0	0	0	0	否	否	全胚冷冻
1093	1	2018030291	吕彦娜	≥35	37	2	刺激方案	1	375	＞10天	11	＞3000	4125	HCG	2	5	3	继发不孕	2.24	＞24	25.7	女方因素	4	4.9	1471	0.63	3	11.26	4.01	93	2	6	4.5	A	IVF	2	0	2	0	0	0	0	否	否	全胚冷冻
1802	1	C00003694	王婷婷	＜35	33	2	降调节方案	3	300	≤10天	9	≤3000	2700	HCG	1	3	0	继发不孕	2.73	≤24	22.9	女方因素	2	1.17	536	0.69	4	7.16	4.01	65.69	1	8	7.4	A	IVF	1	0	1	0	1	1	0	否	是	移植	未妊娠
246	0	C00017666	弭守莺	＜35	34	1	拮抗剂方案	2	225	＞10天	11	≤3000	2475	HCG	4	0	0	原发不孕	2.86	＞24	27.6	女方因素	7	4.74	1914	0.54	4	5.89	4.02	57	1	12	13.9	A-B	IVF	1	0	1	0	1	1	0	否	是	移植	未妊娠
398	0	2018030047	栾明慧	＜35	30	1	降调节方案	3	200	＞10天	12	≤3000	2400	HCG	6	0	0	原发不孕	2.21	≤24	20.3	不明原因	7	0.56	1366	0.7	8	5.7	4.03	29	1	20	10.6	A	IVF	4	0	2	0	2	2	0	否	是	移植	已妊娠	临床妊娠	宫内妊娠	单胎宫内妊娠
492	1	C00006406	刘文华	≥35	41	3	刺激方案	1	368.182	＞10天	11	＞3000	4050	HCG	12	0	0	原发不孕	1.41	＞24	24.2	女方因素	6	7.84	2552	1.39	6	4.87	4.03	76.43	2	9	0.9	A-B	IVF	5	0	2	0	0	0	0	否	否	全胚冷冻
607	0	2017110182	刘文华	≥35	39	1	降调节方案	3	225	≤10天	9	≤3000	2025	HCG	12	0	0	原发不孕	3.89	＞24	24.2	女方因素	6	1.8	1458	1.47	7	4.87	4.03	46.43	2	17	11.6	A	IVF	4	0	2	0	2	2	0	否	是	移植	未妊娠
388	0	2017020098	窦方花	＜35	32	1	降调节方案	3	250	＞10天	12	≤3000	3000	HCG	9	1	0	继发不孕	2.49	＞24	26	女方因素	8	3.23	2621	2.09	8	7.4	4.04	46.43	1	11	13		IVF	7	0	6	4	0	0	0	否	否	全胚冷冻
644	0	2017100159	李洁	＜35	30	1	降调节方案	3	184.091	＞10天	11	≤3000	2025	HCG	3	0	0	原发不孕	3.81	≤24	21.5	女方因素	5	1.03	894	0.47	6	6.37	4.04	30	1	16	14.5	A	IVF	2	0	2	0	2	2	0	否	是	移植	未妊娠
1947	1	C00003763	吴素敏	≥35	38	1	刺激方案	1	356.25	≤10天	8	≤3000	2850	HCG	5	2	1	继发不孕	1.45	≤24	19.1	不明原因	2	11.38	511	0.97	3	13.38	4.04	69.8	2	7	9	A	IVF	1	0	0	0	0	0	0	是		无可移植胚胎
244	0	C00013283	许红	＜35	31	1	拮抗剂方案	2	202.5	≤10天	10	≤3000	2025	HCG	3	0	0	原发不孕	2.55	＞24	25.3	女方因素	7	2.2	1971	0.55	5	8.21	4.05	32	1	14	13.8	A	IVF	4	0	3	0	0	0	0	否	否	全胚冷冻
719	0	C00012329	戚聿婷	＜35	34	1	降调节方案	3	225	＞10天	12	≤3000	2700	HCG	2	3	0	继发不孕	1.46	≤24	23.5	女方因素	5	3.03	1151	0.59	6	8.87	4.05	19	1	12	11.4	B	IVF	6	0	6	0	0	0	0	否	否	全胚冷冻
593	1	C00017249	杨小玲	≥35	39	2	刺激方案	1	300	＞10天	16	＞3000	4800	HCG	8	1	0	继发不孕	1.98	＞24	25.2	男方因素	6	0.04	1553	0.25	5	9.24	4.06	11	2	10	11.6	A	ICSI	5	0	2	0	2	2	0	否	是	移植	已妊娠	临床妊娠	宫内妊娠	单胎宫内妊娠
966	1	C00016440	张海燕	≥35	40	2	刺激方案	1	300	≤10天	7	≤3000	2100	HCG	3	1	0	继发不孕	1.81	≤24	21.1	女方因素	4	7.96	1392	1.14	4	6.66	4.06	57	2	10	0.9	A	IVF	3	0	2	0	0	0	0	否	否	全胚冷冻
1337	1	2016070225	刘志莲	≥35	42	8	刺激方案	1	300	≤10天	8	≤3000	2400	HCG	16	0	0	原发不孕	1.5	＞24	25.5	女方因素	3	2	638	1.21	1	9.65	4.06	56	2	9	9	A	IVF	1	0	1	1	1	1	0	否	是	移植	未妊娠
1057	0	C00007916	李丹妮	＜35	28	1	刺激方案	1	225	≤10天	8	≤3000	1800	HCG	4	0	0	原发不孕	2.75	≤24	20.1	混合因素	4	6.44	1681	0.92	5	19.49	4.07	33	1	7	6.4	A-B	ICSI	5	0	3	2	0	0	0	否	否	全胚冷冻
1489	0	2016030332	于江华	≥35	41	1	刺激方案	1	150	≤10天	7	≤3000	1050	HCG	2	1	1	继发不孕	1.67	≤24	22.4	男方因素	3	1.42	812	0.41	6	8.85	4.07	39.66	2	9	13.2	A-B	IVF	5	0	4	0	0	0	0	否	否	全胚冷冻
175	1	C00006402	王俊	＜35	30	1	降调节方案	3	361.765	＞10天	17	＞3000	6150	HCG	4	0	0	原发不孕	1.56	＞24	28.7	混合因素	8	1.16	2385	1.26	7	5.4	4.08	30	1	22	0.92	A	ICSI	3	0	2	0	2	2	0	否	是	移植	已妊娠	临床妊娠	宫内妊娠	单胎宫内妊娠
922	1	C00013404	于欣	≥35	42	2	拮抗剂方案	2	333.333	≤10天	9	≤3000	3000	HCG	5	4	1	继发不孕	1.28	＞24	24.2	女方因素	4	3.82	892	0.18	4	10.53	4.08	58	2	8	9.6	B	IVF	2	1	3	2	2	2	0	否	是	移植	未妊娠
1545	1	C00010066	于欣	≥35	41	1	降调节方案	3	400	≤10天	9	＞3000	3600	HCG	4	4	1	继发不孕	1.44	＞24	24.2	女方因素	3	5.3	1170	0.53	5	10.53	4.08	58	2	8	0.84	A-B	IVF	2	1	2	1	0	0	0	否	否	全胚冷冻
447	1	C00014083	张文文	≥35	36	1	降调节方案	3	312.5	＞10天	12	＞3000	3750	HCG	7	2	1	继发不孕	3.87	≤24	19.8	女方因素	6	0.63	1814	1.35	7	6.15	4.09	52	2	15	17.5	A	IVF	6	0	4	1	0	0	0	否	否	全胚冷冻
1358	0	C00015531	赵亚萍	＜35	30	1	降调节方案	3	253.846	＞10天	13	＞3000	3300	HCG	1	3	0	继发不孕	1.42	≤24	22	女方因素	3	0.34	551	2.43	2	7.38	4.09	22	1	8	1.07	A	IVF	1	1	1	0	0	0	0	否	否	全胚冷冻
2260	0	2017080143	刘文静	＜35	32	1	拮抗剂方案	2	214.286	＞10天	14	≤3000	3000	双扳机	3	0	0	原发不孕	1.82	≤24	24	女方因素	1	16.96	331	0.64	0	6.3	4.09	45.2	1	6				0	0	0	0	0	0	0	是		未取到卵
157	0	C00009340	张艳华	＜35	31	2	降调节方案	3	210	＞10天	15	＞3000	3150	HCG	3	1	1	继发不孕	2.6	≤24	23.8	混合因素	8	0.91	1832	1.38	8	8.2	4.1	50	1	11	15.4	A-B	ICSI	5	0	4	2	0	0	0	否	否	全胚冷冻
540	1	2017060108	程宪菊	≥35	42	1	刺激方案	1	333.333	≤10天	9	≤3000	3000	HCG	2	1	1	继发不孕	1.7	≤24	21.9	女方因素	6	7.81	2038	1.9	5	7.5	4.1	23.18	2	9	8.1	A	IVF	3	0	1	1	0	0	0	否	否	全胚冷冻
793	0	C00018989	徐秀云	＜35	26	1	刺激方案	1	243.75	≤10天	8	≤3000	1950	HCG	6	0	0	原发不孕	1.23	＞24	24.4	女方因素	5	2.39	1668.44	1.29	5	8.22	4.1	46.67	1	6	10.6	C	IVF	3	1	3	2	0	0	0	否	否	全胚冷冻
893	1	C00016410	信近翠	＜35	33	1	拮抗剂方案	2	390.625	≤10天	8	＞3000	3125	HCG	2	3	1	继发不孕	2.3	≤24	22.3	女方因素	5	3.79	1060	1.64	3	8.14	4.1	30.1	1	8	11.3	B	IVF	3	0	1	0	1	1	0	否	是	移植	未妊娠
913	1	C00009949	陈琳	≥35	35	3	拮抗剂方案	2	291.667	≤10天	9	≤3000	2625	HCG	3	4	1	继发不孕	1.46	＞24	26	女方因素	4	1.63	958	0.27	3	11.51	4.1	22	2	12	7.5	A-B	IVF	2	0	0	0	0	0	0	是		无可移植胚胎
1075	1	C00007056	陈琳	≥35	35	2	降调节方案	3	294.643	＞10天	14	＞3000	4125	HCG	4	4	1	继发不孕	1.76	＞24	26	女方因素	4	2.88	1565	0.48	4	11.51	4.1	22	2	12	10.6	B	IVF	2	0	1	0	1	1	0	否	是	移植	未妊娠
71	1	C00016660	刘中红	≥35	37	1	刺激方案	1	300	≤10天	9	≤3000	2700	HCG	1	3	0	继发不孕	1.4	＞24	25.3	女方因素	7	7.59	1929	1.34	6	13.57	4.11	64	2	12	0.92	A-B	IVF	5	3	5	0	0	0	0	否	否	全胚冷冻
1041	1	C00006584	闫宁宁	＜35	28	1	刺激方案	1	435.938	＞10天	16	＞3000	6975	双扳机	5	1	0	继发不孕	2.71	≤24	21.3	混合因素	4	3.07	1785	1.46	3	10.84	4.11	51	1	7	0.95	B	ICSI	2	0	2	0	0	0	0	否	否	全胚冷冻
1513	0	C00011109	李香纷	＜35	29	1	刺激方案	1	225	≤10天	7	≤3000	1575	HCG	2	0	0	原发不孕	2.64	≤24	20.3	女方因素	3	3.99	877	0.5	5	13.72	4.11	46	1	11	9.2	A	IVF	2	0	2	0	2	2	0	否	是	移植	已妊娠	临床妊娠	宫内妊娠	双胎宫内妊娠
6	0	2017020209	刘宁宁	≥35	35	1	降调节方案	3	257.692	＞10天	13	＞3000	3350	HCG	2	3	1	继发不孕	2.17	≤24	23.4	女方因素	10	0.89	2237	1.48	9	7.14	4.12	31	2	10	11.7	A	IVF	7	0	2	0	2	2	0	否	是	移植	未妊娠
179	1	C00016253	于明月	≥35	37	1	降调节方案	3	300	≤10天	9	≤3000	2700	HCG	1	1	1	继发不孕	3.76	＞24	27.3	女方因素	8	1.32	2311	0.58	8	5.17	4.12	40.63	2	14	12.3	B	IVF	5	0	2	0	2	2	0	否	是	移植	未妊娠
397	1	2016030196	李玉连	≥35	39	1	刺激方案	1	312.5	＞10天	12	＞3000	3750	HCG	7	1	0	继发不孕	1.67	≤24	21.4	女方因素	7	2.07	1367	1.52	8	6.98	4.12	55.42	2	12	11	A	IVF	7	0	2	0	2	2	0	否	是	移植	已妊娠	临床妊娠	宫内妊娠	双胎宫内妊娠
847	1	2016080036	王晓乐	＜35	31	1	降调节方案	3	312.5	≤10天	10	＞3000	3125	HCG	3	0	0	原发不孕	2.29	≤24	22.3	女方因素	5	3.05	1343	1.46	3	5.17	4.12	40.63	1	13	14.3	A-B	IVF	1	0	2	0	2	2	0	否	是	移植	未妊娠
267	0	C00018491	朱红梅	≥35	35	1	拮抗剂方案	2	225	＞10天	11	≤3000	2475	HCG	3	3	2	继发不孕	2.81	≤24	20.8	女方因素	7	5.39	2399	1.67	4	5.89	4.13	51.87	2	16	8.6	A	IVF	1	0	0	0	0	0	0	是		无可移植胚胎
25	0	2018060112	孙美华	＜35	34	1	降调节方案	3	225	≤10天	8	≤3000	1800	HCG	7	1	0	原发不孕	2.5	≤24	23.3	不明原因	10	0.88	1839	3.6	7	6.27	4.14	34.76	1	11	9.9	B	IVF	4	0	4	3	2	2	0	否	是	移植	已妊娠	临床妊娠	宫内妊娠	单胚胎停
130	1	C00016636	徐利立	＜35	31	1	降调节方案	3	480	＞10天	15	＞3000	7200	HCG	5	2	1	继发不孕	2.11	＞24	35.8	女方因素	8	0.19	1832	0.78	6	6.87	4.14	24.86	1	14	10.8	A-B	IVF	3	0	0	0	0	0	0	是		无可移植胚胎
290	1	C00009492	王倩倩	＜35	32	1	刺激方案	1	450	≤10天	9	＞3000	4050	HCG	4	0	0	原发不孕	2.79	＞24	24.4	女方因素	7	5.53	1831	1.51	4	5.53	4.14	49	1	12	0.87		IVF	1	0	4	0	0	0	0	否	否	全胚冷冻
912	0	C00016206	蔺爱	≥35	35	3	拮抗剂方案	2	185.714	≤10天	7	≤3000	1300	HCG	3	3	1	继发不孕	2.1	≤24	18	男方因素	4	4.95	961	0.88	4	7.3	4.15	39.09	2	9	12.4	A-B	ICSI	3	0	3	3	0	0	0	否	否	全胚冷冻
1558	1	C00012492	蔺爱	＜35	34	1	拮抗剂方案	2	291.667	≤10天	9	≤3000	2625	HCG	3	3	1	继发不孕	1.48	≤24	18	女方因素	3	5.18	1137	0.73	4	7.3	4.15	49.09	1	9	1.12	A	IVF	3	0	2	1	1	1	0	否	是	移植	未妊娠
1923	0	C00015841	蔺爱	≥35	35	2	刺激方案	1	225	≤10天	8	≤3000	1800	HCG	3	3	1	继发不孕	1.26	≤24	18	女方因素	2	6.29	470	1.06	0	7.3	4.15	49.09	2	7	9.3	A-B		0	0	0	0	0	0	0	是		未取到卵
64	0	C00018512	司薇薇	＜35	29	2	降调节方案	3	275	＞10天	11	＞3000	3025	HCG	4	0	0	原发不孕	1.41	＞24	27.3	女方因素	9	1.91	2632.32	1.43	9	4.82	4.16	46	1	13	8.9	A	IVF	8	0	4	2	0	0	0	否	否	全胚冷冻
1926	1	2016010024	田林林	＜35	31	3	刺激方案	1	375	＞10天	12	＞3000	4500	HCG	5	0	0	原发不孕	1.51	≤24	22.8	男方因素	5	1.83	1064	0.94	6	8.34	4.16	30	1	8	9.6	B	ICSI	3	0	2	2	2	2	0	否	是	移植	未妊娠
255	1	C00008187	刘秋娟	≥35	35	1	降调节方案	3	305.357	＞10天	14	＞3000	4275	HCG	3	2	1	继发不孕	2.59	≤24	23.2	女方因素	7	1.38	1719	0.9	9	11.73	4.17	41	2	13	1.3	A-B	IVF	9	0	4	2	2	2	0	否	是	移植	未妊娠
1227	1	C00011456	张克彩	≥35	38	1	拮抗剂方案	2	300	≤10天	9	≤3000	2700	HCG	1	2	1	继发不孕	2.680	＞24	28.8	女方因素	3	14.43	973	0.9	2	6.73	4.17	41	2	9	1.53	A-B	IVF	1	0	0	0	0	0	0	是		无可移植胚胎
186	0	2016040104	王萍	＜35	28	1	降调节方案	3	150	＞10天	13	≤3000	1950	HCG	5	0	0	原发不孕	4.49	＞24	29.3	女方因素	8	2.63	2220	1.01	7	6.15	4.18	26	1	62	9.2	A	IVF	4	0	4	2	2	2	0	否	是	移植	已妊娠	临床妊娠	宫内妊娠	单胚胎停
303	0	2016010100	付帅	＜35	27	3	降调节方案	3	166.667	＞10天	15	≤3000	2500	HCG	5	0	0	原发不孕	1.90	≤24	21.4	不明原因	7	2.03	2493	1.17	9	5.89	4.18	93	1	24	8.6	A	IVF	9	0	2	0	0	0	0	否	否	全胚冷冻
1443	1	2016100067	殷庆瑞	≥35	39	2	降调节方案	3	450	≤10天	9	＞3000	4050	HCG	14	0	0	原发不孕	1.49	≤24	21.6	混合因素	3	7.65	913	0.79	3	7.21	4.18	69.73	2	8	13.1	B	ICSI	4	0	2	1	2	2	0	否	是	移植	已妊娠	临床妊娠	宫内妊娠	双胎胎停
271	0	2018030283	陈琳	＜35	33	2	降调节方案	3	287.5	＞10天	12	＞3000	3450	HCG	5	0	0	原发不孕	2.85	≤24	19.7	不明原因	7	0.91	2253	1.31	8	7.8	4.2	32.34	1	12	12.5	A-B	ICSI	4	0	2	1	0	0	0	否	否	全胚冷冻
381	0	C00016942	刘文欣	≥35	40	1	拮抗剂方案	2	200	≤10天	10	≤3000	2000	HCG	7	1	0	继发不孕	1.53	≤24	18.5	女方因素	8	3.22	2650	1.18	9	8.5	4.2	35.4	2	13	10	A	IVF	6	0	6	3	2	2	0	否	是	移植	未妊娠
483	0	2016020011	刘双	≥35	37	1	降调节方案	3	207.692	＞10天	13	≤3000	2700	HCG	1	1	1	原发不孕	1.44	≤24	21.2	女方因素	6	1.22	1684	1.31	4	6.69	4.2	31	2	10	10.7	A	IVF	4	0	2	0	2	2	0	否	是	移植	未妊娠
742	1	2016090220	刘双	≥35	38	2	刺激方案	1	402.273	＞10天	11	＞3000	4425	HCG	1	1	1	原发不孕	2.37	≤24	21.2	女方因素	5	1.95	1437	1.53	9	6.69	4.2	46.43	2	10	11	B	IVF	6	0	4	3	0	0	0	否	否	全胚冷冻
815	1	2018030238	王爱华	≥35	40	1	刺激方案	1	300	≤10天	10	≤3000	3000	HCG	3	0	0	原发不孕	1.68	≤24	22.3	女方因素	5	10.06	1538	0.45	4	8.24	4.2	51.38	2	8	4.7	A	IVF	1	0	1	0	0	0	0	否	否	全胚冷冻
1141	1	C00017922	周丽琴	≥35	38	1	拮抗剂方案	2	300	≤10天	8	≤3000	2400	HCG	1	7	1	继发不孕	1.702	≤24	23.1	女方因素	4	10.61	1307.54	0.96	3	12.3	4.2	26	2	7	11.5	A	IVF	2	0	2	0	2	2	0	否	是	移植	已妊娠	临床妊娠	宫内妊娠	单胎宫内妊娠
1329	1	2017110105	孙敏	＜35	34	3	刺激方案	1	292.5	≤10天	10	≤3000	2925	HCG	3	1	0	继发不孕	1.62	≤24	19.4	女方因素	3	13.51	663	1.05	3	8.6	4.2	31	1	6	5.6	B	IVF	3	0	2	1	0	0	0	否	否	全胚冷冻
119	0	C00018724	李晓	＜35	25	1	降调节方案	3	253.125	≤10天	8	≤3000	2025	HCG	1	0	0	原发不孕	2.54	＞24	35.8	女方因素	9	1.9	1274.16	0.96	9	6.42	4.21	41.49	1	18	17.8	A-B	IVF	6	0	4	0	0	0	0	否	否	全胚冷冻
790	0	C00019620	魏赢	≥35	35	1	拮抗剂方案	2	258.333	≤10天	9	≤3000	2325	HCG	1	1	0	继发不孕	1.41	＞24	30.1	女方因素	5	5.05	1683.21	1.23	7	6.8	4.21	19.27	2	20	10.2	A-B	IVF	3	0	2	1	2	2	0	否	是	移植	未妊娠
857	1	2018050008	冀萌	≥35	35	2	拮抗剂方案	2	317.045	＞10天	11	＞3000	3487.5	HCG	1	0	0	原发不孕	1.89	＞24	24.2	女方因素	5	3.07	1283	1.32	4	11.26	4.21	50	2	7	9.6	A	IVF	2	0	2	1	1	1	0	否	是	移植	未妊娠
1074	0	C00013221	曹玉平	≥35	43	1	拮抗剂方案	2	290.357	≤10天	7	≤3000	2032.5	HCG	5	3	1	继发不孕	1.24	≤24	20.6	男方因素	4	5.75	1567	1.09	5	6.42	4.21	41.49	2	10	12	A	IVF	4	0	2	0	2	2	0	否	是	移植	已妊娠	临床妊娠	宫内妊娠	单胎宫内妊娠
1609	0	2018010149	冀萌	＜35	34	1	刺激方案	1	225	≤10天	7	≤3000	1575	HCG	1	0	0	原发不孕	1.7	＞24	24.2	男方因素	2	8.81	982	1.56	2	11.26	4.21	50	1	7	5	A	ICSI	1	0	1	0	0	0	0	否	否	全胚冷冻
294	0	C00004423	张晨	＜35	34	1	降调节方案	3	216.667	≤10天	9	≤3000	1950	HCG	3	0	0	原发不孕	1.59	≤24	21.2	女方因素	7	2.3	2737	1.27	9	6.85	4.22	47	1	13	0.81	A	IVF	6	0	2	1	2	2	0	否	是	移植	未妊娠
573	1	C00015477	马成丰	≥35	43	2	刺激方案	1	300	≤10天	10	≤3000	3000	HCG	4	1	1	继发不孕	1.53	＞24	26.2	女方因素	6	2.94	1724	0.56	6	13.45	4.22	14	2	9	11.8	A	IVF	2	0	2	0	2	2	0	否	是	移植	未妊娠
182	0	2016080078	李申美	≥35	36	2	降调节方案	3	225	≤10天	10	≤3000	2250	HCG	8	0	0	原发不孕	2.09	≤24	22.8	混合因素	8	0.62	2284	0.86	7	6.45	4.23	64	2	20	18	A	ICSI	4	0	2	0	2	2	0	否	是	移植	已妊娠	临床妊娠	宫内妊娠	单胚胎停
183	1	C00009709	孟丛	＜35	29	2	刺激方案	1	300	≤10天	9	≤3000	2700	HCG	4	0	0	原发不孕	2.58	≤24	21.1	男方因素	8	6.55	2265	2.22	9	6.2	4.23	84.41	1	13	0.8	A	ICSI	4	0	0	0	0	0	0	是		无可移植胚胎
270	1	2017020142	郄慧芝	≥35	44	1	降调节方案	3	300	≤10天	9	≤3000	2700	HCG	2	1	1	继发不孕	2.45	≤24	23.4	女方因素	7	9.13	2274	0.64	7	6.85	4.23	59.86	2	10	10.6	A	IVF	1	0	1	0	0	0	0	否	否	全胚冷冻
335	0	2017020208	李申美	≥35	37	3	降调节方案	3	187.5	≤10天	10	≤3000	1875	HCG	1	1	0	继发不孕	4.02	≤24	22.8	混合因素	7	0.96	2009	0.87	9	5.45	4.23	64	2	20	18.7	A	ICSI	5	0	2	0	2	2	0	否	是	移植	未妊娠
337	0	2017060087	郄慧芝	≥35	44	2	刺激方案	1	290	≤10天	5	≤3000	1450	HCG	2	1	1	继发不孕	1.28	≤24	23.4	女方因素	7	1.58	1976	0.5	6	6.85	4.23	59.86	2	10	10.4	B	IVF	2	0	2	1	2	2	0	否	是	移植	未妊娠
828	0	2018070093	徐美丽	＜35	31	1	刺激方案	1	150	≤10天	7	≤3000	1050	HCG	2	0	0	继发不孕	1.82	≤24	22.7	女方因素	5	16.33	1445	1.32	6	5.46	4.23	77	1	11	5.1	A	IVF	2	1	1	0	0	0	0	否	否	全胚冷冻
511	1	C00012154	李俊丽	＜35	30	1	拮抗剂方案	2	296.25	≤10天	10	≤3000	2962.5	双扳机	2	0	0	原发不孕	2.20	≤24	20	女方因素	6	1.08	2361	0.37	2	6.3	4.24	41.3	1	8	12.8	B	IVF	1	0	0	0	0	0	0	是		无可移植胚胎
988	1	2016120224	顾新玲	≥35	38	1	降调节方案	3	300	≤10天	10	≤3000	3000	HCG	1	4	1	继发不孕	1.29	＞24	27.6	女方因素	4	2.44	1318	0.49	6	6.66	4.24	28	2	7	9.6	A	IVF	1	0	0	0	0	0	0	是		无可移植胚胎
1232	0	2017070150	顾新玲	≥35	38	2	降调节方案	3	201.923	＞10天	13	≤3000	2625	HCG	1	4	1	继发不孕	2.23	＞24	27.6	女方因素	3	2.19	965	0.29	2	6.66	4.24	28	2	7	8.3	A-B	IVF	0	0	0	0	0	0	0	是		无可移植胚胎
809	0	2017110263	丁秋凤	≥35	40	1	拮抗剂方案	2	235.909	＞10天	11	≤3000	2595	HCG	2	2	1	继发不孕	2.340	≤24	21.9	混合因素	5	1.82	1561	0.93	6	6.98	4.25	45.76	2	8	12.5	A	ICSI	5	0	2	0	0	0	0	否	否	全胚冷冻
225	1	2016020110	崔文娟	≥35	39	2	降调节方案	3	455.357	＞10天	14	＞3000	6375	HCG	2	3	0	继发不孕	1.55	≤24	23	不明原因	8	1.16	1548	1.06	5	9.19	4.26	66.06	2	12	13	A-B	IVF	3	0	2	2	2	2	0	否	是	移植	未妊娠
1753	0	2016100166	吕丹	＜35	27	1	刺激方案	1	190.533	＞10天	15	≤3000	2858	HCG	4	0	0	原发不孕	1.82	≤24	21.7	女方因素	2	0.89	623	0.43	3	11.45	4.26	18	1	7	13.6	A	IVF	1	0	1	1	1	1	0	否	是	移植	已妊娠	临床妊娠	宫内妊娠	单胎宫内妊娠
134	0	2018030241	刘芬	＜35	30	1	降调节方案	3	206.25	＞10天	12	≤3000	2475	HCG	4	0	0	原发不孕	3.070	≤24	19.8	不明原因	8	1.69	1623	1.55	4	7.36	4.27	61	1	8	18.1	B	IVF	2	0	2	0	0	0	0	否	否	全胚冷冻
682	1	C00004401	陈学会	≥35	42	2	拮抗剂方案	2	385.227	＞10天	11	＞3000	4237.5	双扳机	1	3	1	继发不孕	1.83	≤24	22.6	女方因素	5	5.46	1804	1.25	6	9.12	4.28	32	2	15	10	A	IVF	3	0	3	2	2	2	0	否	是	移植	未妊娠
1564	1	2017050262	王慧	＜35	28	1	刺激方案	1	300	≤10天	8	≤3000	2400	HCG	3	0	0	原发不孕	2.51	≤24	17.5	男方因素	3	1.64	1100	0.8	3	18.44	4.28	53	1	9	9.8	A	ICSI	3	0	3	2	0	0	0	否	否	全胚冷冻
1514	0	2018040189	王书花	＜35	31	1	降调节方案	3	237.5	＞10天	12	≤3000	2850	HCG	3	2	0	继发不孕	4.12	≤24	22.5	女方因素	3	0.47	870	0.46	6	7.32	4.29	76.43	1	12	10.8	A	IVF	2	0	0	0	0	0	0	是		无可移植胚胎
1739	0	C00004804	于承利	≥35	38	1	拮抗剂方案	2	150	≤10天	7	≤3000	1050	HCG	1	5	1	继发不孕	1.29	≤24	20	女方因素	2	1.8	651	0.27	2	16.54	4.3	35	2	8	6.6	A	IVF	2	0	0	0	0	0	0	是		无可移植胚胎
606	0	2016120032	李秀粉	≥35	40	1	刺激方案	1	283.333	≤10天	9	≤3000	2550	HCG	2	3	1	继发不孕	1.51	≤24	23.3	女方因素	6	1	1458	0.54	5	6.12	4.31	35.42	2	7	9.3	A	IVF	4	0	1	0	1	1	0	否	是	移植	未妊娠
619	0	C00003722	张新敏	≥35	43	1	拮抗剂方案	2	257.692	＞10天	13	＞3000	3350	双扳机	2	4	1	继发不孕	1.69	≤24	24	女方因素	6	5.59	1310	0.59	5	9.72	4.31	20	2	8	14	A	IVF	3	0	2	2	2	2	0	否	是	移植	未妊娠
957	1	2017040124	孟汝菁	＜35	28	1	刺激方案	1	400	＞10天	15	＞3000	6000	HCG	2	0	0	原发不孕	1.83	＞24	26.1	不明原因	4	9.94	536	1.87	1	5.97	4.31	32.32	1	9	4.2		IVF	0	0	0	0	0	0	0	是		无可移植胚胎
418	0	C00012846	赵贤梅	≥35	41	1	拮抗剂方案	2	285	≤10天	10	≤3000	2850	双扳机	2	3	1	继发不孕	1.45	＞24	28.6	女方因素	7	1.55	1102	2.33	8	9.37	4.32	48	2	10	0.88	B	IVF	5	0	4	1	0	0	0	否	否	全胚冷冻
1327	0	2017090136	李靖	＜35	27	2	刺激方案	1	206.25	≤10天	8	≤3000	1650	HCG	3	1	0	继发不孕	2.71	≤24	22.9	混合因素	3	7.55	664	1.18	3	10.03	4.32	15	1	7	5.6	A	ICSI	3	0	0	0	0	0	0	是		无可移植胚胎
142	1	2018050026	李同	＜35	26	2	降调节方案	3	384.375	＞10天	16	＞3000	6150	HCG	2	0	0	原发不孕	2.89	＞24	33.2	男方因素	8	0.35	2243	1.88	5	7.35	4.33	36.43	1	15	13.1	A-B	ICSI	1	0	0	0	0	0	0	是		无可移植胚胎
272	0	C00010194	刘莹	≥35	39	1	拮抗剂方案	2	286.364	＞10天	11	＞3000	3150	HCG	1	4	2	继发不孕	4.56	≤24	21.8	女方因素	7	1.06	2217	1.6	9	6.6	4.33	41	2	14	0.92	A	IVF	7	2	4	0	2	2	0	否	是	移植	未妊娠
417	0	2017050261	孙英英	＜35	29	1	降调节方案	3	150	≤10天	10	≤3000	1500	HCG	4	0	0	原发不孕	2.74	≤24	22.7	女方因素	7	0.41	1135	1.03	5	7.13	4.33	41	1	12	11.4	A	IVF	4	0	4	3	2	2	0	否	是	移植	已妊娠	临床妊娠	宫内妊娠	双胎宫内妊娠
596	1	2018040206	邹丽艳	≥35	35	1	降调节方案	3	390.909	＞10天	11	＞3000	4300	HCG	5	0	0	原发不孕	5.23	≤24	21.3	女方因素	6	1.62	1539	0.58	7	6.4	4.33	27.19	2	12	10.8	A-B	IVF	5	0	1	0	0	0	0	否	否	全胚冷冻
1888	1	C00011610	刘莹	≥35	40	2	刺激方案	1	300	≤10天	7	≤3000	2100	HCG	1	4	2	继发不孕	1.24	≤24	21.8	女方因素	6	6.38	1191	1.24	7	6.6	4.33	31	2	11	0.72	A	IVF	2	0	2	1	0	0	0	否	否	全胚冷冻
1083	1	2016080191	郝玉婷	≥35	36	1	降调节方案	3	354.545	＞10天	11	＞3000	3900	HCG	4	1	0	继发不孕	2.1	≤24	23.4	女方因素	4	5.08	1520	1.88	2	8.36	4.34	66.61	2	11	8.4	A	IVF	1	0	1	0	1	1	0	否	是	移植	未妊娠
1354	0	2017030009	郝玉婷	≥35	37	2	降调节方案	3	231.818	＞10天	11	≤3000	2550	HCG	4	1	0	继发不孕	1.45	≤24	23.4	女方因素	3	7.62	567	0.56	2	8.36	4.34	66.61	2	11	11.1	A	IVF	1	0	0	0	0	0	0	是		无可移植胚胎
1357	1	2017060202	郝玉婷	≥35	37	3	降调节方案	3	412.5	＞10天	12	＞3000	4950	HCG	4	1	0	继发不孕	1.37	≤24	23.4	女方因素	3	7.51	553	0.71	1	8.36	4.34	66.61	2	11	9.8	A	IVF	1	0	0	0	0	0	0	是		无可移植胚胎
556	1	2018030242	党玉霞	≥35	42	1	刺激方案	1	345	≤10天	10	＞3000	3450	HCG	5	0	0	原发不孕	2.27	≤24	22.3	男方因素	6	14.96	1856	2.18	6	12.34	4.35	60	2	10	7	A	ICSI	3	0	2	1	0	0	0	否	否	全胚冷冻
985	1	2018070049	党玉霞	≥35	42	2	刺激方案	1	350	≤10天	9	＞3000	3150	HCG	5	0	0	原发不孕	1.47	≤24	22.3	男方因素	4	16.11	1338	1.57	4	12.34	4.35	60	2	10	5.2	A-B	ICSI	0	0	0	0	0	0	0	是		无可移植胚胎
1058	1	C00016021	张春燕	＜35	32	2	降调节方案	3	323.077	＞10天	13	＞3000	4200	HCG	4	0	0	原发不孕	1.4	≤24	19.7	男方因素	4	1.5	1671	0.74	4	16.9	4.35	17	1	8	12.1	A	ICSI	2	0	2	0	2	2	0	否	是	移植	未妊娠
1403	1	C00006379	党玉霞	≥35	44	4	拮抗剂方案	2	416.667	≤10天	9	＞3000	3750	双扳机	5	0	0	原发不孕	2.72	≤24	22.3	混合因素	3	1.83	882	0.97	5	12.34	4.35	60	2	10	0.91	A	ICSI	3	0	2	2	0	0	0	否	否	全胚冷冻
2054	1	C00014848	张春燕	＜35	31	1	拮抗剂方案	2	359.615	＞10天	13	＞3000	4675	HCG	4	0	0	原发不孕	1.69	≤24	19.7	女方因素	1	37.96	644	1.33	1	16.9	4.35	17	1	8	13.6	A-B	IVF	1	0	0	0	0	0	0	是		无可移植胚胎
209	1	C00017037	邝玲芝	＜35	33	1	降调节方案	3	301.923	＞10天	13	＞3000	3925	HCG	5	3	1	继发不孕	2.87	≤24	20.7	女方因素	8	2.05	1826	1.08	8	7.54	4.36	51	1	10	11.4		IVF	5	0	4	2	2	2	0	否	是	移植	已妊娠	临床妊娠	宫外妊娠	异位妊娠
482	1	2017040144	张立伟	＜35	29	1	刺激方案	1	300	＞10天	11	＞3000	3300	HCG	3	0	0	原发不孕	1.2	≤24	20.7	女方因素	6	1.52	1698	1.48	5	7.91	4.36	50.1	1	8	12.6	A-B	IVF	4	0	2	1	0	0	0	否	否	全胚冷冻
1562	1	2016020162	仇清华	＜35	31	2	降调节方案	3	375	＞10天	11	＞3000	4125	HCG	4	0	0	原发不孕	2.712	≤24	20.9	女方因素	3	1.75	1104	0.97	2	8.53	4.36	47.4	1	7	10.5	A	IVF	1	0	1	0	1	1	0	否	是	移植	未妊娠
1570	0	C00011063	成海燕	≥35	42	2	刺激方案	1	225	≤10天	10	≤3000	2250	HCG	1	5	1	继发不孕	1.26	＞24	26.4	女方因素	3	8.33	1081	1.25	4	8.35	4.36	38	2	8	0.44	B	IVF	2	0	3	1	0	0	0	否	否	全胚冷冻
138	1	2016020069	刘玉华	≥35	40	1	刺激方案	1	300	≤10天	8	≤3000	2400	HCG	3	1	0	继发不孕	1.8	≤24	22	女方因素	6	4.33	2010	0.91	9	11.7	4.37	33	2	10	8.6	A	IVF	7	0	5	1	2	2	0	否	是	移植	已妊娠	临床妊娠	宫内妊娠	单胚胎停
568	0	C00008992	刘玉欣	＜35	34	1	降调节方案	3	262.5	≤10天	8	≤3000	2100	HCG	3	0	0	原发不孕	2.29	≤24	23.4	女方因素	6	4.39	1778	1.48	8	16.58	4.37	37	1	14	10	A	IVF	6	0	4	0	2	2	0	否	是	移植	未妊娠
1305	0	2017080013	牛玉	≥35	38	2	刺激方案	1	216.667	≤10天	9	≤3000	1950	HCG	1	2	1	继发不孕	4.63	≤24	23.6	男方因素	3	0.5	764	0.76	3	7.16	4.37	43	2	9	6.8	B	ICSI	3	0	2	0	0	0	0	否	否	全胚冷冻
1231	0	2018020041	刘甜	＜35	28	1	降调节方案	3	225	＞10天	12	≤3000	2700	HCG	2	1	0	继发不孕	1.56	＞24	24.2	女方因素	3	3.16	967	1.06	3	8.51	4.38	93	1	8	11.1	A-B	IVF	3	0	2	0	2	2	0	否	是	移植	未妊娠
635	1	2017100191	石金玲	≥35	37	4	刺激方案	1	300	≤10天	7	≤3000	2100	HCG	3	2	1	继发不孕	1.56	≤24	23.5	女方因素	6	2.21	1276	2.14	6	7.13	4.39	34.34	2	10	9.7	B	IVF	3	0	3	1	0	0	0	否	否	全胚冷冻
275	1	2017080115	王静	＜35	31	1	刺激方案	1	300	≤10天	9	≤3000	2700	HCG	1	1	0	继发不孕	1.78	≤24	22.5	女方因素	7	8.78	2153	0.96	8	6.38	4.4	33.36	1	11	9	A-B	IVF	4	0	2	0	0	0	0	否	否	全胚冷冻
1318	0	2018020093	韩露	＜35	26	2	降调节方案	3	150	≤10天	9	≤3000	1350	HCG	1	0	0	原发不孕	1.74	≤24	18.4	男方因素	3	1.04	711	0.55	6	9.63	4.4	34.56	1	20	12.5	A	ICSI	4	0	1	1	1	1	0	否	是	移植	已妊娠	临床妊娠	宫内妊娠	单胎宫内妊娠
118	0	C00004832	杨晓燕	≥35	39	2	降调节方案	3	206.25	＞10天	12	≤3000	2475	HCG	2	2	1	继发不孕	1.781	＞24	30.1	女方因素	9	3.34	1386	0.62	5	6.04	4.41	69.73	2	17	1.21	A	IVF	4	0	2	0	0	0	0	否	否	全胚冷冻
1020	0	2017090066	公庆会	≥35	43	3	刺激方案	1	182.143	≤10天	7	≤3000	1275	HCG	5	3	1	继发不孕	2.48	≤24	23.4	女方因素	4	5.73	1194	1.49	5	8.89	4.42	38.64	2	14	11.3	A-B	IVF	3	0	2	0	2	2	0	否	是	移植	未妊娠
506	1	C00011785	孙淼	≥35	37	3	刺激方案	1	375	≤10天	10	＞3000	3750	HCG	3	1	0	原发不孕	1.24	≤24	20.3	女方因素	6	8.73	2422	0.6	3	9.69	4.43	47	2	8	7.6	B	IVF	3	0	2	0	0	0	0	否	否	全胚冷冻
528	0	2018020067	陆婷婷	＜35	29	1	降调节方案	3	287.5	＞10天	12	＞3000	3450	HCG	2	1	0	继发不孕	1.48	≤24	21.5	女方因素	6	2.2	2159	1.3	6	6.62	4.43	50.1	1	10	10.6	A	IVF	5	0	2	0	2	2	0	否	是	移植	未妊娠
1614	0	2017080061	胡芳	＜35	31	1	刺激方案	1	204.545	＞10天	11	≤3000	2250	HCG	2	0	0	原发不孕	2.55	＞24	29.6	女方因素	2	7.24	971	0.71	5	10.89	4.43	21	1	6	9.2	B	IVF	4	0	2	0	0	0	0	否	否	全胚冷冻
2152	1	C00008628	孙淼	≥35	36	1	刺激方案	1	350	≤10天	5	≤3000	1750	双扳机	3	1	0	原发不孕	1.47	≤24	23.4	女方因素	1	27.85	365	4.73		9.69	4.43	47	2	8	10.6	A-B		0	0	0	0	0	0	0	是		未取卵
66	1	2016030073	周艳华	＜35	34	1	降调节方案	3	293.75	≤10天	8	≤3000	2350	HCG	4	2	1	继发不孕	3.21	≤24	22.4	女方因素	7	0.5	2525	1.08	8	8.16	4.44	34	1	19	11.2	A	IVF	5	0	4	0	2	2	0	否	是	移植	未妊娠
1480	0	2018030089	刘彩	≥35	47	2	拮抗剂方案	2	281.25	≤10天	4	≤3000	1125	HCG	3	5	1	继发不孕	1.92	＞24	25	混合因素	3	2.01	862.71	0.7	4	7.57	4.44	60	2	8	10.1	B-C	ICSI	2	0	2	1	2	2	0	否	是	移植	未妊娠
372	0	C00006388	闫正芳	≥35	43	1	降调节方案	3	214.286	＞10天	14	≤3000	3000	HCG	3	3	1	继发不孕	1.41	≤24	24	女方因素	7	1.09	1671	0.87	7	11.11	4.45	10	2	12	1.17	A	IVF	3	0	2	1	2	2	0	否	是	移植	未妊娠
406	0	2016050250	王敏敏	≥35	39	2	降调节方案	3	220.385	＞10天	13	≤3000	2865	HCG	2	0	0	原发不孕	1.213	＞24	29.1	女方因素	7	1.08	1273	0.76	5	5.34	4.45	29	2	11	14.8	A-B	IVF	3	0	0	0	0	0	0	是		无可移植胚胎
494	0	C00008606	闫正芳	≥35	43	2	降调节方案	3	271.154	＞10天	13	＞3000	3525	HCG	3	3	1	继发不孕	1.87	≤24	24	女方因素	6	1.65	2531	1.32	6	11.11	4.45	10	2	12	1	A-B	IVF	3	0	2	0	0	0	0	否	否	全胚冷冻
703	0	2016080222	邓祥红	≥35	40	2	降调节方案	3	225	＞10天	12	≤3000	2700	HCG	1	4	1	继发不孕	1.43	＞24	25.3	女方因素	5	10.06	1671	1.45	8	6.89	4.45	73.77	2	14	7.8	A	IVF	5	0	4	2	2	2	0	否	是	移植	已妊娠	临床妊娠	宫内妊娠	单胚胎停
1560	1	2017060019	陈明霞	≥35	46	2	刺激方案	1	300	≤10天	9	≤3000	2700	HCG	1	5	2	继发不孕	1.54	≤24	22.9	混合因素	3	2.35	1105	1.31	4	11.64	4.45	41	2	6	8.6	A	ICSI	4	0	2	0	0	0	0	否	否	全胚冷冻
2158	0	C00013223	齐妍飞	≥35	36	2	拮抗剂方案	2	150	≤10天	9	≤3000	1350	HCG	6	1	1	继发不孕	1.22	＞24	27	女方因素	1	8.64	348	0.21	2	10.66	4.45	38	2	6	1	A-B	IVF	1	0	2	1	2	2	0	否	是	移植	未妊娠
192	0	C00018354	刘耐璐	＜35	28	2	降调节方案	3	278.571	＞10天	14	＞3000	3900	HCG	1	0	0	原发不孕	3.95	≤24	18.8	男方因素	8	0.61	2116.28	0.41	6	6.24	4.46	42	1	12	12.3	A-B	ICSI	4	0	2	1	2	2	0	否	是	移植	未妊娠
265	1	C00016909	侯尧	＜35	32	1	刺激方案	1	342.857	≤10天	7	≤3000	2400	HCG	1	2	0	继发不孕	1.77	≤24	19.8	女方因素	7	11.6	2418	1.56	5	10.11	4.46	53	1	9	0.4	A-B	IVF	1	0	1	0	0	0	0	否	否	全胚冷冻
941	0	2016120028	王玉娥	＜35	33	1	降调节方案	3	262.5	≤10天	8	≤3000	2100	HCG	3	0	0	原发不孕	4.12	≤24	20.6	混合因素	4	0.19	805	0.88	9	6.24	4.46	42	1	14	14.5	A	ICSI	8	0	4	1	2	2	0	否	是	移植	未妊娠
344	1	C00006670	赵春红	≥35	40	1	刺激方案	1	450	≤10天	10	＞3000	4500	HCG	7	1	1	继发不孕	1.3	＞24	33.2	女方因素	7	5	1876	1.2	3	5.52	4.48	52	2	7	1.78	B	IVF	2	0	2	0	0	0	0	否	否	全胚冷冻
392	0	2016120213	刘庆娥	≥35	35	1	刺激方案	1	180	≤10天	10	≤3000	1800	HCG	3	4	1	继发不孕	1.32	≤24	19.2	混合因素	7	13.08	1409	1.06	6	12.02	4.48	53	2	8	9.3	A	ICSI	4	0	4	1	2	2	0	否	是	移植	未妊娠
921	1	C00006116	邹丽艳	≥35	37	2	拮抗剂方案	2	412.5	≤10天	10	＞3000	4125	HCG	6	0	0	原发不孕	1.85	≤24	21.3	女方因素	4	3.54	928	0.44	5	12.14	4.48	18	2	12	10.5	A	IVF	4	0	4	3	2	2	0	否	是	移植	已妊娠	临床妊娠	宫内妊娠	单胎宫内妊娠
1754	1	2016030263	张吉明	≥35	37	1	降调节方案	3	325	＞10天	12	＞3000	3900	HCG	5	1	1	继发不孕	1.8	＞24	31.2	女方因素	2	4.89	623	0.94	3	7.78	4.48	86.43	2	10	15	A	IVF	1	0	1	0	0	0	0	否	否	全胚冷冻
1856	1	2016080230	张吉明	≥35	38	2	刺激方案	1	401.786	＞10天	14	＞3000	5625	HCG	5	1	1	继发不孕	3.48	＞24	31.2	女方因素	2	0.45	404	0.45	3	7.78	4.48	86.43	2	10	13.5	B	IVF	2	0	1	0	0	0	0	否	否	全胚冷冻
38	0	C00005141	王俊霞	≥35	35	1	降调节方案	3	206.25	＞10天	12	≤3000	2475	HCG	1	2	0	继发不孕	1.57	≤24	22	男方因素	9	4.07	1322	0.59	7	4.78	4.49	43.5	2	11	10.9	A	ICSI	1	0	1	0	0	0	0	否	否	全胚冷冻
452	1	C00016712	郭玲玲	＜35	33	2	刺激方案	1	300	≤10天	7	≤3000	2100	HCG	7	0	0	原发不孕	1.87	≤24	22.6	女方因素	6	12.48	1778	1.93	6	9.91	4.49	31	1	9	0.52	B-C	IVF	4	0	2	1	0	0	0	否	否	全胚冷冻
720	1	2018070011	衣艳斐	≥35	37	2	降调节方案	3	293.75	＞10天	12	＞3000	3525	HCG	2	2	2	继发不孕	2.51	＞24	24.4	女方因素	5	3.41	1570	0.75	6	8.87	4.49	82	2	10	8.4	A-B	IVF	3	0	2	1	2	2	0	否	是	移植	已妊娠	临床妊娠	宫内妊娠	单胎宫内妊娠
775	1	C00014629	郭玲玲	＜35	32	1	刺激方案	1	300	＞10天	12	＞3000	3600	HCG	7	0	0	原发不孕	1.4	≤24	22.6	女方因素	5	22.29	1782	2.15	1	9.91	4.49	31	1	9	0.47	B	IVF	1	0	1	0	0	0	0	否	否	全胚冷冻
930	0	C00019332	孟凤娟	≥35	37	2	刺激方案	1	253.846	＞10天	13	＞3000	3300	HCG	3	2	1	继发不孕	1.4	≤24	20.7	女方因素	4	41.17	862.71	2.27	2	10.64	4.49	69.09	2	8	9.2	A	IVF	1	0	0	0	0	0	0	是		无可移植胚胎
978	0	2016060081	王发娜	＜35	34	3	刺激方案	1	285	≤10天	10	≤3000	2850	HCG	3	0	0	原发不孕	1.4	≤24	22.4	不明原因	4	13.03	1360	1.38	3	8.03	4.49	42.05	1	6	8.3	B	IVF	1	0	0	0	0	0	0	是		无可移植胚胎
1181	0	C00004540	陈小焕	＜35	30	1	拮抗剂方案	2	228.409	＞10天	11	≤3000	2512.5	HCG	6	1	1	继发不孕	1.20	≤24	21.5	女方因素	4	9.17	1129	0.81	3	12.8	4.49	41	1	10	11.5	A	IVF	2	0	1	1	1	1	0	否	是	移植	已妊娠	临床妊娠	宫内妊娠	单胎宫内妊娠
1770	1	2017030100	王发娜	≥35	35	4	刺激方案	1	300	≤10天	9	≤3000	2700	HCG	3	0	0	原发不孕	1.42	≤24	22.4	不明原因	2	1.36	599	2.49	1	8.03	4.49	42.05	2	6	9.9	B	IVF	1	0	1	1	0	0	0	否	否	全胚冷冻
1240	0	C00019145	王小娟	≥35	41	1	拮抗剂方案	2	282.692	＞10天	13	＞3000	3675	HCG	3	1	0	继发不孕	1.28	≤24	20.8	女方因素	3	2.37	934.88	0.71	3	8.02	4.5	46.65	2	8	10.4	A	IVF	1	0	0	0	0	0	0	是		无可移植胚胎
224	0	2017110003	田媛	＜35	30	1	降调节方案	3	181.25	＞10天	12	≤3000	2175	HCG	2	0	0	原发不孕	2.08	≤24	23.3	不明原因	8	3.85	1556	1	7	7.98	4.51	24	1	20	9.5	A	IVF	2	0	1	0	1	1	0	否	是	移植	已妊娠	临床妊娠	宫内妊娠	单胎宫内妊娠
546	1	2016120206	周长荣	≥35	37	1	刺激方案	1	337.5	＞10天	16	＞3000	5400	HCG	4	0	0	原发不孕	2.27	＞24	24.7	女方因素	6	4.28	1985	1.41	7	10.37	4.51	50.6	2	11	14.5	B	IVF	4	0	2	0	0	0	0	否	否	全胚冷冻
748	0	C00012980	铉磊	＜35	23	1	刺激方案	1	225	≤10天	8	≤3000	1800	HCG	2	0	0	继发不孕	1.68	≤24	23.4	男方因素	5	0.56	1405	0.36	3	7.03	4.51	45	1	11	0.83	A	ICSI	2	0	1	1	1	1	0	否	是	移植	未妊娠
148	1	2016060026	王静	≥35	37	1	降调节方案	3	345	＞10天	15	＞3000	5175	HCG	1	6	1	继发不孕	1.87	≤24	21.3	女方因素	8	0.35	2008	0.7	4	6.16	4.52	47.71	2	12	10.5	A-B	IVF	3	0	2	0	2	2	0	否	是	移植	已妊娠	临床妊娠	宫内妊娠	单胎宫内妊娠
1225	0	C00016748	于萍	＜35	34	1	降调节方案	3	283.333	≤10天	9	≤3000	2550	HCG	1	0	0	原发不孕	2.4	＞24	24.6	女方因素	3	3.95	974	0.85	3	11.9	4.52	44	1	12	13.9	A	IVF	2	0	2	0	0	0	0	否	否	全胚冷冻
309	1	C00018947	李保丽	≥35	43	2	降调节方案	3	311.111	≤10天	9	≤3000	2800	HCG	3	3	1	继发不孕	1.87	≤24	22.9	女方因素	7	1.92	2292.72	0.98	7	5.98	4.53	48	2	12	12.8	B	IVF	2	0	2	0	0	0	0	否	否	全胚冷冻
233	0	2016060160	孟丽丽	＜35	31	2	降调节方案	3	268.182	＞10天	11	≤3000	2950	HCG	6	0	0	原发不孕	2.3	＞24	24.8	混合因素	5	0.84	1583	0.71	7	8.16	4.54	91.75	1	12	12.6	A-B	ICSI	7	0	5	2	0	0	0	否	否	全胚冷冻
366	0	C00004286	徐传凤	＜35	31	1	降调节方案	3	183.333	≤10天	9	≤3000	1650	HCG	6	0	0	原发不孕	1.55	≤24	20.8	男方因素	7	1.59	1765	1.62	5	5.86	4.54	44	1	17	0.95	A	ICSI	4	0	1	0	1	1	0	否	是	移植	未妊娠
754	0	C00014714	靳红霞	＜35	32	2	降调节方案	3	272.727	＞10天	11	≤3000	3000	HCG	1	3	1	继发不孕	4.27	＞24	27.2	混合因素	5	6.5	1369	1.1	6	11.67	4.54	32	1	16	10.2	A	ICSI	1	0	0	0	0	0	0	是		无可移植胚胎
1665	1	C00012691	薛爱华	≥35	48	4	刺激方案	1	300	≤10天	7	≤3000	2100	HCG	3	2	1	继发不孕	2.82	＞24	25	女方因素	2	6.61	834	0.37	1	10.12	4.54	17	2	8	0.86	A	IVF	1	0	0	0	0	0	0	是		无可移植胚胎
582	0	2016040127	李晓燕	＜35	34	1	刺激方案	1	150	≤10天	7	≤3000	1050	HCG	6	1	0	继发不孕	1.81	≤24	17.7	不明原因	6	1.61	1626	0.92	6	6.48	4.55	30.1	1	11	9.7	A	IVF	3	0	2	0	2	2	0	否	是	移植	未妊娠
594	0	2018030162	张莉	≥35	35	4	降调节方案	3	277.5	≤10天	10	≤3000	2775	HCG	11	0	0	原发不孕	1.62	≤24	21.6	不明原因	6	1.34	1548	3.12	6	5.15	4.55	59.09	2	8	13.1	A	IVF	6	0	4	2	0	0	0	否	否	全胚冷冻
1199	0	2016090215	张莉	＜35	33	1	刺激方案	1	266.667	≤10天	9	≤3000	2400	HCG	11	0	0	原发不孕	2.63	≤24	21.6	女方因素	4	5.26	1055	2.5	6	5.15	4.55	59.09	1	8	11.2	A	IVF	2	0	2	0	0	0	0	否	否	全胚冷冻
1302	0	2017020077	张莉	＜35	34	2	刺激方案	1	262.5	≤10天	8	≤3000	2100	HCG	11	0	0	原发不孕	1.91	≤24	21.6	女方因素	3	1.06	773	0.66	2	5.15	4.55	59.09	1	8	11	A	IVF	1	0	1	0	1	1	0	否	是	移植	未妊娠
1456	0	2017060262	张莉	＜35	34	3	刺激方案	1	225	≤10天	9	≤3000	2025	HCG	11	0	0	原发不孕	2.63	≤24	21.6	女方因素	3	6.99	888	3.71	3	5.15	4.55	59.09	1	8	7.7	A-B	IVF	2	0	1	0	0	0	0	否	否	全胚冷冻
430	1	2016030123	张奉	＜35	32	1	降调节方案	3	337.5	≤10天	8	≤3000	2700	HCG	4	1	0	继发不孕	2.72	＞24	33.3	女方因素	6	1.44	909	0.44	7	10.18	4.56	46	1	12	11.9	A	IVF	0	0	0	0	0	0	0	否	否	全胚冷冻
501	1	C00008718	张君	≥35	38	1	拮抗剂方案	2	300	＞10天	12	＞3000	3600	双扳机	2	3	1	继发不孕	2.66	≤24	22.1	女方因素	6	1.56	2476	1.88	5	8.91	4.56	24.76	2	9	10.6	A	IVF	4	0	4	3	0	0	0	否	否	全胚冷冻
605	1	2017030282	彭华	≥35	39	3	刺激方案	1	320.455	＞10天	11	＞3000	3525	HCG	1	4	1	继发不孕	1.77	≤24	21.2	混合因素	6	1.72	1464	0.78	4	8.66	4.56	55	2	12	9	A	ICSI	3	0	2	0	2	2	0	否	是	移植	已妊娠	临床妊娠	宫内妊娠	单胎宫内妊娠
407	1	C00009307	柏海云	≥35	41	1	降调节方案	3	321.154	＞10天	13	＞3000	4175	HCG	6	0	0	原发不孕	1.86	＞24	28.7	女方因素	7	2.13	1270	1.02	5	7.82	4.57	19	2	12	1.26	A	IVF	2	0	2	1	2	2	0	否	是	移植	未妊娠
1921	1	C00016030	任俊杰	≥35	36	1	拮抗剂方案	2	325	≤10天	10	＞3000	3250	HCG	1	3	0	继发不孕	2.31	≤24	22.3	女方因素	2	3.95	477	0.89	3	9.27	4.57	33	2	7	6.2	C	IVF	1	0	1	1	0	0	0	否	否	全胚冷冻
463	1	C00015966	李娟	≥35	36	1	降调节方案	3	343.75	＞10天	12	＞3000	4125	HCG	3	1	0	继发不孕	1.26	≤24	22.3	女方因素	6	1.89	1648	1.38	7	6.89	4.58	59	2	14	10.5	C	IVF	6	0	4	1	2	2	0	否	是	移植	未妊娠
982	1	C00011933	李新文	＜35	30	2	刺激方案	1	300	≤10天	8	≤3000	2400	HCG	3	0	0	原发不孕	2.46	≤24	21.8	混合因素	4	20.45	1344	2.16	3	11.62	4.58	71	1	8	0.75	B	ICSI	3	0	2	0	0	0	0	否	否	全胚冷冻
1581	1	C00011155	刘静静	＜35	28	2	拮抗剂方案	2	325	≤10天	9	≤3000	2925	HCG	6	0	0	原发不孕	1.49	≤24	20.7	女方因素	3	3.04	1044	0.92	2	14.93	4.58	52	1	8	13.3	A	IVF	1	0	0	0	0	0	0	是		无可移植胚胎
1593	1	C00010110	刘静静	＜35	28	1	拮抗剂方案	2	295	＞10天	15	＞3000	4425	双扳机	6	0	0	原发不孕	2.32	≤24	20.7	女方因素	3	6.2	1013	0.51	2	14.93	4.58	52	1	8	14.5	A	IVF	1	0	0	0	0	0	0	是		无可移植胚胎
1597	1	C00018677	李新文	＜35	32	7	刺激方案	1	450	≤10天	8	＞3000	3600	HCG	3	0	0	原发不孕	2.1	≤24	21.8	混合因素	3	3.63	918	1.27	3	11.62	4.58	71	1	9	6.3	B	ICSI	1	0	1	1	0	0	0	否	否	全胚冷冻
609	0	C00014510	裴晓	＜35	33	1	拮抗剂方案	2	212.5	≤10天	8	≤3000	1700	HCG	1	5	0	继发不孕	1.97	＞24	28.7	女方因素	6	4.22	1438	0.68	5	8.3	4.59	26.29	1	9	0.74	A-B	IVF	4	0	4	1	2	2	0	否	是	移植	未妊娠
1204	1	C00016741	裴晓	＜35	34	2	刺激方案	1	300	≤10天	7	≤3000	2100	HCG	1	5	0	继发不孕	2.88	＞24	28.7	女方因素	4	6.3	1032	0.6	2	8.3	4.59	26.29	1	9	0.48	A	IVF	2	0	2	2	0	0	0	否	否	全胚冷冻
368	1	C00015089	李小会	≥35	35	2	刺激方案	1	443.182	＞10天	11	＞3000	4875	HCG	6	1	0	继发不孕	1.29	＞24	24.9	女方因素	7	3.21	1728	0.75	4	11.84	4.6	55	2	11	1.16	A	IVF	2	0	0	0	0	0	0	是		无可移植胚胎
369	1	2017110283	张静丽	＜35	24	2	降调节方案	3	318.75	＞10天	12	＞3000	3825	HCG	2	2	1	继发不孕	3.80	＞24	25.7	不明原因	7	1.71	1724	1.37	9	4.3	4.6	37.84	1	17	10.1	B	IVF	7	0	3	1	2	2	0	否	是	移植	未妊娠
611	0	C00003462	王微微	≥35	36	1	降调节方案	3	275	＞10天	18	＞3000	4950	HCG	3	2	2	继发不孕	1.93	＞24	26.4	女方因素	6	2.6	1362	0.67	6	5.21	4.6	23.67	2	14	1.5	A-B	IVF	4	0	2	0	0	0	0	否	否	全胚冷冻
983	1	C00012746	李小会	≥35	35	1	刺激方案	1	337.5	≤10天	10	＞3000	3375	HCG	6	1	0	继发不孕	2.93	＞24	24.9	女方因素	4	3.17	1343	0.72	3	11.84	4.6	55	2	9			IVF	1	0	0	0	0	0	0	是		无可移植胚胎
1186	0	2016040047	屈世宏	≥35	37	1	降调节方案	3	219.231	＞10天	13	≤3000	2850	HCG	2	1	0	继发不孕	1.93	≤24	19.8	女方因素	4	1.64	1120	0.99	4	10.09	4.6	59.09	2	6	11	A	IVF	3	0	2	1	2	2	0	否	是	移植	已妊娠	临床妊娠	宫内妊娠	单胎宫内妊娠
1531	1	2017040092	李现敬	≥35	35	1	降调节方案	3	300	＞10天	11	＞3000	3300	HCG	6	4	1	继发不孕	1.29	＞24	25	女方因素	3	2.92	1233	1.12	4	6.3	4.6	50.46	2	9	13.6	A-B	IVF	3	0	2	1	2	2	0	否	是	移植	已妊娠	临床妊娠	宫内妊娠	双胎宫内妊娠
58	0	2018050160	裴俊荣	≥35	39	1	降调节方案	3	285	≤10天	10	≤3000	2850	HCG	1	2	2	继发不孕	1.41	≤24	20.4	女方因素	9	0.56	2800	1.98	7	10.5	4.61	65.76	2	11	12	A-B	IVF	5	0	4	0	0	0	0	否	否	全胚冷冻
428	1	C00015165	孟丽丽	≥35	37	1	刺激方案	1	300	＞10天	12	＞3000	3600	HCG	6	0	0	原发不孕	1.62	≤24	22.7	混合因素	6	5.75	945	2.46	2	13.01	4.61	41	2	10	1.09	A		0	0	0	0	0	0	0	是		未行授精
850	0	2018050113	薛芸	＜35	25	1	降调节方案	3	217.5	≤10天	10	≤3000	2175	HCG	3	0	0	原发不孕	1.61	≤24	22	女方因素	5	0.83	1302	0.96	6	6.15	4.61	39.09	1	10	11.5	A-B	IVF	4	0	1	0	0	0	0	否	否	全胚冷冻
1306	1	2016060025	王丽颖	≥35	40	3	降调节方案	3	330.882	＞10天	17	＞3000	5625	HCG	8	2	0	继发不孕	1.47	≤24	22	女方因素	3	0.87	754	0.73	3	8.3	4.61	35.42	2	7	10	A-B	IVF	3	0	0	0	0	0	0	是		无可移植胚胎
1484	1	C00012480	张克彩	≥35	38	2	刺激方案	1	300	≤10天	7	≤3000	2100	HCG	1	2	1	继发不孕	1.3	＞24	28.8	女方因素	3	9.14	844.63	0.66	5	6.01	4.61	41	2	9	0.57	A-B	IVF	2	0	0	0	0	0	0	是		无可移植胚胎
1517	1	2016020136	万连艳	≥35	40	1	刺激方案	1	347.727	＞10天	11	＞3000	3825	HCG	18	0	0	原发不孕	1.85	＞24	25.6	女方因素	3	4.44	854.39	1.48	6	10.57	4.61	15	2	10	13.3	A	IVF	4	0	2	0	2	2	0	否	是	移植	未妊娠
1723	1	2016050004	王丽颖	≥35	36	2	刺激方案	1	343.75	＞10天	12	＞3000	4125	HCG	8	2	0	继发不孕	1.47	≤24	22	女方因素	2	2.95	706	0.78	2	8.3	4.61	35.42	2	7	8.3	A	IVF	0	0	0	0	0	0	0	是		未受精
146	1	C00013119	郭晓蝶	＜35	30	1	降调节方案	3	611.682	＞10天	11	＞3000	6728.5	HCG	3	0	0	原发不孕	3.05	≤24	19.6	男方因素	8	1.76	2168	0.5	8	5.87	4.62	32.4	1	16	12.5	A	ICSI	5	0	4	1	2	2	0	否	是	移植	已妊娠	临床妊娠	宫内妊娠	单胎宫内妊娠
633	0	C00005672	徐瑞华	≥35	37	1	拮抗剂方案	2	272.727	＞10天	11	≤3000	3000	双扳机	12	0	0	原发不孕	2.48	≤24	21.4	女方因素	6	2.08	1041	0.71	5	12.09	4.62	55	2	8	12.1	A	IVF	0	0	0	0	0	0	0	是		无可移植胚胎
31	0	2017060097	王加花	≥35	38	1	降调节方案	3	252.5	≤10天	10	≤3000	2525	HCG	3	2	1	继发不孕	1.49	≤24	23.3	女方因素	9	2.28	1672	1.42	4	7.02	4.63	100.56	2	10	16.5	B	IVF	3	0	0	0	0	0	0	是		无可移植胚胎
132	1	C00014959	赵艳	≥35	35	1	拮抗剂方案	2	382.143	≤10天	7	≤3000	2675	双扳机	1	4	1	继发不孕	1.57	≤24	21.2	女方因素	8	2.09	2757	1.19	9	4.77	4.63	32	2	15	13	A-B	IVF	7	2	2	0	0	0	0	否	否	全胚冷冻
143	0	2018060006	姜迎新	＜35	28	3	降调节方案	3	122.727	＞10天	11	≤3000	1350	HCG	1	2	0	继发不孕	2.94	≤24	19.7	女方因素	8	19.94	2233	0.99	6	5.12	4.63	34.56	1	14	8.3	A	IVF	0	0	0	0	0	0	0	是		无可移植胚胎
405	1	C00014728	吴慧慧	≥35	35	8	拮抗剂方案	2	300	＞10天	11	＞3000	3300	HCG	7	0	0	原发不孕	1.45	＞24	27.3	男方因素	7	6.39	1277	0.58	3	6.57	4.63	31	2	11	6.3	B-C	ICSI	3	0	0	0	0	0	0	是		无可移植胚胎
724	1	C00017518	王海莉	≥35	39	1	拮抗剂方案	2	366.346	＞10天	13	＞3000	4762.5	HCG	1	1	1	继发不孕	1.50	≤24	21.5	女方因素	5	0.87	1553	2.03	5	7.87	4.63	79	2	9	12.2	B	IVF	2	3	4	0	0	0	0	否	否	全胚冷冻
1914	1	2018040093	高洁	≥35	37	1	刺激方案	1	371.053	＞10天	19	＞3000	7050	双扳机	3	2	0	继发不孕	1.49	＞24	25.8	女方因素	4	1.15	794	1.33	5	17.56	4.64	24	2	6	6.2	A-B	IVF	5	0	0	0	0	0	0	是		无可移植胚胎
2148	1	C00009555	禇延苓	≥35	39	1	刺激方案	1	450	＞10天	11	＞3000	4950	HCG	1	4	0	继发不孕	1.66	≤24	22.9	女方因素	1	9.84	376	2.2	0	12.58	4.64	13	2	6	0.83	A-B		0	0	0	0	0	0	0	是		未取到卵
2155	1	2017050211	姜东艳	≥35	37	1	刺激方案	1	300	≤10天	9	≤3000	2700	HCG	4	0	0	继发不孕	1.3	≤24	20.8	混合因素	1	25.23	357	0.69	1	11.64	4.64	47.4	2	6	14.9	A-B	ICSI	1	0	0	0	0	0	0	是		无可移植胚胎
292	0	2017120074	张海燕	≥35	36	1	降调节方案	3	275	＞10天	11	＞3000	3025	HCG	3	0	0	原发不孕	1.77	≤24	19.5	女方因素	7	0.8	2770	1.57	5	5.86	4.65	49.09	2	10	13.4	A	IVF	1	0	1	0	1	1	0	否	是	移植	已妊娠	临床妊娠	宫内妊娠	单胚胎停
420	1	2016060075	刘小文	＜35	33	1	降调节方案	3	302.5	＞10天	15	＞3000	4537.5	HCG	7	2	0	继发不孕	3.98	≤24	20.6	女方因素	7	0.47	1067	0.58	7	7.91	4.65	41.75	1	19	11.8	A	IVF	4	0	4	3	0	0	0	否	否	全胚冷冻
23	1	2016060206	刘伟英	≥35	39	1	降调节方案	3	361.364	＞10天	11	＞3000	3975	HCG	11	2	1	继发不孕	1.74	≤24	22.2	女方因素	8	5.38	2004	0.76	8	8.15	4.66	40	2	11	15	A	IVF	6	0	5	2	2	2	0	否	是	移植	未妊娠
868	1	C00007558	赵晓彤	＜35	31	1	降调节方案	3	450	≤10天	8	＞3000	3600	HCG	6	0	0	原发不孕	1.29	＞24	33.6	女方因素	5	3.1	1198	0.57	5	5.16	4.66	24	1	11	1.3	B	IVF	1	0	0	0	0	0	0	是		无可移植胚胎
1209	1	C00010247	巩向莉	＜35	32	1	降调节方案	3	371.591	＞10天	22	＞3000	8175	HCG	2	4	1	继发不孕	1.76	＞24	34.6	女方因素	4	0.63	1003	0.33	4	7.26	4.66	18	1	7	15.2	B	IVF	4	0	2	1	2	2	0	否	是	移植	未妊娠
1420	1	2016060207	姜丽	≥35	35	1	降调节方案	3	392.857	≤10天	7	≤3000	2750	HCG	5	5	1	继发不孕	1.43	≤24	22.8	女方因素	3	10.36	981	0.87	3	6.15	4.66	40	2	8	8.8	A	IVF	2	0	2	0	2	2	0	否	是	移植	未妊娠
1574	0	C00012039	赵晓彤	＜35	31	2	刺激方案	1	233.333	≤10天	9	≤3000	2100	HCG	6	0	0	原发不孕	2.3	＞24	33.6	男方因素	3	3.95	1070	0.43	1	5.16	4.66	24	1	11	1.13	B	ICSI	1	0	1	1	0	0	0	否	否	全胚冷冻
19	0	2016040273	张清	＜35	28	1	降调节方案	3	160	＞10天	15	≤3000	2400	HCG	4	1	0	继发不孕	5.60	＞24	32	女方因素	10	1.25	2140	1.12	5	6.25	4.67	59.09	1	72	0.81	B	IVF	1	0	1	0	1	1	0	否	是	移植	未妊娠
231	0	2016120118	肖叶	＜35	34	1	降调节方案	3	238.462	＞10天	13	＞3000	3100	HCG	3	1	0	继发不孕	1.33	≤24	18.5	女方因素	8	0.93	1354	0.56	9	7.43	4.67	73.4	1	11	14.7	A-B	IVF	6	0	3	1	0	0	0	否	否	全胚冷冻
451	0	2017010115	JANG SANGYOON	＜35	30	2	降调节方案	3	272.727	＞10天	11	≤3000	3000	HCG	1	0	0	原发不孕	1.26	≤24	20.4	男方因素	6	2.03	1791	0.72	9	5.64	4.67	86.43	1	10	13.3	A-B	ICSI	3	0	3	0	0	0	0	否	否	全胚冷冻
691	0	C00003388	张金凤	≥35	41	1	拮抗剂方案	2	177.273	＞10天	11	≤3000	1950	HCG	3	3	1	继发不孕	1.5	＞24	25.6	女方因素	5	1.05	1760	0.94	6	6.81	4.67	79	2	10	6.3	A-B	IVF	5	0	0	0	0	0	0	是		无可移植胚胎
1122	1	2016090248	张杰	≥35	41	1	降调节方案	3	380	＞10天	15	＞3000	5700	HCG	1	0	0	继发不孕	2.4	≤24	21.8	女方因素	4	1.12	1369	0.65	7	8.12	4.67	36.43	2	10	10.9	A	IVF	3	0	3	3	2	2	0	否	是	移植	已妊娠	临床妊娠	宫内妊娠	单胎宫内妊娠
1249	1	2017030146	吕红丽	＜35	33	1	刺激方案	1	300	≤10天	9	≤3000	2700	HCG	5	4	0	继发不孕	1.86	≤24	20.4	女方因素	3	8.9	911	1.49		7.48	4.67	29	1	15	9.5	A		0	0	0	0	0	0	0	是		未取卵
76	0	2016020143	彭春霞	≥35	38	3	降调节方案	3	258.75	≤10天	10	≤3000	2587.5	HCG	4	2	1	原发不孕	2.21	＞24	26.6	女方因素	9	0.51	2344	0.61	7	8.86	4.68	42	2	16	9.4	A	IVF	7	0	4	0	2	2	0	否	是	移植	已妊娠	临床妊娠	宫内妊娠	单胎宫内妊娠
136	0	2016030102	姚双	＜35	23	1	降调节方案	3	240	≤10天	10	≤3000	2400	HCG	1	3	0	继发不孕	2.45	≤24	21	女方因素	8	0.76	1544	1.34	8	5.19	4.68	25.75	1	16	11	A	IVF	4	0	3	1	2	2	0	否	是	移植	未妊娠
519	0	C00016196	肖倩慧	＜35	31	1	降调节方案	3	277.5	≤10天	10	≤3000	2775	HCG	3	0	0	原发不孕	2.02	≤24	17.1	女方因素	6	1.65	2245	3.17	6	6.37	4.68	42	1	11	1.62	A	IVF	4	0	4	3	0	0	0	否	否	全胚冷冻
1001	0	C00016290	孙玉新	＜35	33	1	降调节方案	3	252.273	＞10天	11	≤3000	2775	HCG	5	0	0	原发不孕	2.03	≤24	19.3	女方因素	4	2.04	1274	1.19	6	8.86	4.68	42	1	7	10.2	A	IVF	3	0	1	1	1	1	0	否	是	移植	未妊娠
174	0	2018010081	韩倩倩	＜35	29	1	降调节方案	3	236.538	＞10天	13	＞3000	3075	HCG	3	0	0	原发不孕	2.91	≤24	17.4	混合因素	8	1.43	2396	1.78	4	6.44	4.69	29.6	1	12	10	A	ICSI	2	0	2	1	2	2	0	否	是	移植	未妊娠
453	1	2017110222	张金玲	≥35	39	1	降调节方案	3	300	＞10天	14	＞3000	4200	HCG	2	2	1	继发不孕	1.46	≤24	21.5	女方因素	6	2.45	1775	1.38	5	10.05	4.69	33.7	2	8	11	B	IVF	3	0	3	1	2	2	0	否	是	移植	未妊娠
1481	1	C00004966	张金玲	≥35	41	4	拮抗剂方案	2	294.231	＞10天	13	＞3000	3825	双扳机	2	2	1	继发不孕	2.340	≤24	21.5	女方因素	3	4.81	860	0.71	4	10.05	4.69	33.7	2	8	9.8	B	IVF	2	0	2	1	0	0	0	否	否	全胚冷冻
1840	0	C00003520	张金玲	≥35	41	3	拮抗剂方案	2	246.429	≤10天	7	≤3000	1725	双扳机	2	2	1	继发不孕	1.22	≤24	21.5	女方因素	2	3.03	464	0.63	2	10.05	4.69	33.7	2	8	8	A-B	IVF	2	0	2	2	2	2	0	否	是	移植	未妊娠
1977	0	2017040146	王成芬	＜35	34	1	刺激方案	1	150	≤10天	7	≤3000	1050	HCG	7	0	0	原发不孕	2.08	≤24	20.4	女方因素	2	9.65	433	2.5	1	6.44	4.69	36	1	7	7.5	B	IVF	1	0	1	1	0	0	0	否	否	全胚冷冻
1978	0	2017070029	王成芬	＜35	34	2	刺激方案	1	225	≤10天	6	≤3000	1350	HCG	7	0	0	原发不孕	2.21	≤24	20.4	女方因素	2	10.83	432	3.37	2	6.44	4.69	35.42	1	7	7.7	B	IVF	2	0	2	0	0	0	0	否	否	全胚冷冻
526	0	C00018146	胡传凤	＜35	34	1	拮抗剂方案	2	281.25	≤10天	8	≤3000	2250	HCG	9	2	1	继发不孕	2.89	≤24	23.5	女方因素	6	6.04	2184.3	1.18	7	5.24	4.7	28.14	1	13	16.6	A	IVF	5	0	4	2	0	0	0	否	否	全胚冷冻
1884	0	2018050283	金业佩	＜35	33	1	降调节方案	3	211.364	＞10天	11	≤3000	2325	HCG	2	2	1	继发不孕	1.22	≤24	22	不明原因	6	3.92	1314	0.8	7	5.4	4.7	41	1	10	11.3	A	IVF	4	0	4	2	2	2	0	否	是	移植	已妊娠	临床妊娠	宫内妊娠	单胎宫内妊娠
45	1	C00010174	潘光红	≥35	39	1	降调节方案	3	320.455	＞10天	11	＞3000	3525	HCG	0	2	0	继发不孕	2.4	≤24	21.9	女方因素	9	2.57	2082	1.4	5	7.45	4.71	44.93	2	16	1.25	B	IVF	2	0	2	0	2	2	0	否	是	移植	未妊娠
349	1	2016080034	隋丽	＜35	33	1	降调节方案	3	318.182	＞10天	11	＞3000	3500	HCG	3	0	0	继发不孕	1.67	＞24	26	女方因素	7	0.25	1857	0.57	5	14.34	4.71	30	1	10	9.5	A	IVF	5	0	4	1	2	2	0	否	是	移植	未妊娠
361	1	C00003537	刘俊芝	≥35	39	1	降调节方案	3	368.182	＞10天	11	＞3000	4050	HCG	1	2	1	继发不孕	1.34	≤24	24	女方因素	7	1.91	1801	1.1	7	9.5	4.71	40	2	12	1.02	A	IVF	4	0	2	0	2	2	0	否	是	移植	未妊娠
378	0	2016120046	路艳杰	＜35	28	2	降调节方案	3	166.071	＞10天	14	≤3000	2325	HCG	4	0	0	原发不孕	2.48	≤24	21.3	混合因素	7	1.91	1594	0.6	6	5.43	4.71	18	1	33	14.9	A	ICSI	5	0	4	2	2	2	0	否	是	移植	已妊娠	临床妊娠	宫内妊娠	单胎宫内妊娠
1261	0	2017080276	郭爱玲	≥35	37	1	降调节方案	3	150	≤10天	8	≤3000	1200	HCG	2	1	0	继发不孕	1.24	≤24	21	男方因素	3	3.86	887	0.29	3	7.45	4.71	44.93	2	6	10.1	A	ICSI	3	0	2	0	2	2	0	否	是	移植	未妊娠
479	0	2017080185	刘芳琼	≥35	41	3	刺激方案	1	225	≤10天	8	≤3000	1800	HCG	3	4	1	继发不孕	1.38	≤24	20.5	女方因素	6	19.96	1724	2.03	2	10.67	4.72	48.65	2	9	6.5	B	IVF	0	0	0	0	0	0	0	是		无可移植胚胎
541	1	C00019393	刘兆凤	≥35	35	1	拮抗剂方案	2	300	≤10天	8	≤3000	2400	HCG	6	4	0	继发不孕	1.43	≤24	20.7	女方因素	6	1.53	2035.18	2.43	4	7.68	4.72	32.32	2	11	9.2	A-B	IVF	4	1	4	1	0	0	0	否	否	全胚冷冻
557	0	2016120215	刘芳琼	≥35	41	1	降调节方案	3	191.667	＞10天	12	≤3000	2300	HCG	3	4	1	继发不孕	2.47	≤24	20.5	女方因素	6	5.84	1855	1.29	4	10.67	4.72	48.65	2	9	11	A	IVF	1	0	1	0	1	1	0	否	是	移植	未妊娠
762	0	2017050227	刘芳琼	≥35	41	2	刺激方案	1	283.333	≤10天	9	≤3000	2550	HCG	3	4	1	继发不孕	2.24	≤24	20.5	女方因素	5	9.65	1302	1.73	3	10.67	4.72	38.65	2	9	9.7	A	IVF	1	0	0	0	0	0	0	是		无可移植胚胎
92	0	2016040218	刘晓迪	＜35	32	1	降调节方案	3	273.214	＞10天	14	＞3000	3825	HCG	4	0	0	原发不孕	1.86	≤24	23.7	不明原因	9	0.37	1998	1.29	8	8.01	4.73	40.1	1	17	13.5	A-B	IVF	3	0	1	0	1	1	0	否	是	移植	未妊娠
936	0	C00015597	孙雪岩	＜35	31	1	拮抗剂方案	2	215.625	≤10天	8	≤3000	1725	HCG	3	0	0	原发不孕	1.49	≤24	24	女方因素	4	6.64	831	0.23	4	8.94	4.73	22	1	8	13.2	A-B	IVF	2	0	2	0	2	2	0	否	是	移植	未妊娠
548	0	C00018277	王海云	≥35	45	1	降调节方案	3	288.462	＞10天	13	＞3000	3750	HCG	10	2	1	继发不孕	1.42	≤24	23.4	女方因素	7	0.91	1335.54	1.14	7	6.45	4.74	12	2	17	11.4	A	IVF	7	0	6	2	2	2	0	否	是	移植	未妊娠
1255	1	2017060143	李莎	＜35	30	1	降调节方案	3	380.769	＞10天	13	＞3000	4950	HCG	2	0	0	原发不孕	1.86	＞24	36.7	女方因素	3	2.53	903	0.52	4	7.42	4.74	40	1	11	13.7	A	IVF	3	0	3	1	2	2	0	否	是	移植	已妊娠	临床妊娠	宫内妊娠	单胎宫内妊娠
15	1	C00018683	郑春艳	≥35	43	1	降调节方案	3	347.917	＞10天	12	＞3000	4175	HCG	1	2	1	继发不孕	2.62	＞24	29.1	女方因素	10	0.59	2604	1.27	9	7.87	4.75	70	2	10	12.1	A	IVF	8	0	2	1	2	2	0	否	是	移植	未妊娠
312	1	C00017333	关丽娜	＜35	33	1	拮抗剂方案	2	300	＞10天	11	＞3000	3300	HCG	1	0	0	原发不孕	1.99	≤24	19.4	女方因素	7	1.94	2235	1.37	8	7.16	4.75	55	1	12	11	A	IVF	7	0	2	1	2	2	0	否	是	移植	未妊娠
616	1	C00015260	孙彩云	＜35	32	1	刺激方案	1	425	＞10天	12	＞3000	5100	HCG	5	0	0	原发不孕	1.34	＞24	30.1	女方因素	6	4.27	1323	0.62	5	7.3	4.75	41	1	12	8.5	B	IVF	3	1	3	0	0	0	0	否	否	全胚冷冻
694	1	2016080203	陈东曼	≥35	40	4	降调节方案	3	300	≤10天	9	≤3000	2700	HCG	3	2	1	继发不孕	1.47	≤24	23.4	混合因素	5	7.04	1736	1.1	4	6.17	4.75	12	2	8	11.6	B	ICSI	2	0	1	1	0	0	0	否	否	全胚冷冻
718	0	2017020091	亓惠	≥35	37	1	降调节方案	3	225	＞10天	13	≤3000	2925	HCG	3	4	4	继发不孕	2.45	＞24	24.7	女方因素	5	1.76	1588	0.61	8	7.69	4.75	29.6	2	14	9	A	IVF	7	0	4	1	2	2	0	否	是	移植	已妊娠	临床妊娠	宫内妊娠	单胎宫内妊娠
841	1	2016030328	陈东曼	≥35	39	3	刺激方案	1	475	≤10天	9	＞3000	4275	HCG	3	2	1	继发不孕	1.44	≤24	23.4	混合因素	5	3.28	1371	0.76	6	6.17	4.75	12	2	8	9.6	A	ICSI	2	0	2	0	2	2	0	否	是	移植	未妊娠
1392	1	2017020190	陈东曼	≥35	40	6	降调节方案	3	325	≤10天	9	≤3000	2925	HCG	3	2	1	继发不孕	1.4	≤24	23.4	混合因素	3	7.06	903	0.86	5	6.17	4.75	12	2	8	9.6	A	ICSI	3	0	2	0	2	2	0	否	是	移植	未妊娠
602	0	C00004395	刘艳华	≥35	40	1	拮抗剂方案	2	168.75	≤10天	8	≤3000	1350	HCG	1	4	1	继发不孕	1.8	＞24	24.6	女方因素	6	3.46	1498	0.28	5	6.91	4.76	47	2	12	14.4	A-B	IVF	4	0	2	0	2	2	0	否	是	移植	已妊娠	临床妊娠	宫内妊娠	单胎宫内妊娠
41	1	C00006895	王霞	＜35	29	1	刺激方案	1	479.167	＞10天	18	＞3000	8625	HCG	3	0	0	原发不孕	1.6	＞24	33.2	女方因素	9	6.8	2266	2.21	4	13.82	4.77	27.07	1	10	1.3	B	IVF	1	0	0	0	0	0	0	是		无可移植胚胎
601	1	2016040113	王莹蕊	≥35	38	1	刺激方案	1	300	≤10天	10	≤3000	3000	HCG	2	3	1	继发不孕	1.81	≤24	21.8	男方因素	6	1.72	1514	0.36	5	9.14	4.77	26	2	12	7.4	A	ICSI	3	0	3	1	0	0	0	否	否	全胚冷冻
612	0	2016060047	杨名英	≥35	46	1	刺激方案	1	168.75	≤10天	8	≤3000	1350	HCG		0	0	原发不孕	1.89	＞24	29.6	女方因素	6	0.69	1361	0.44	5	6.62	4.77	80.1	2	6	10.7	A	IVF	4	0	4	3	2	2	0	否	是	移植	未妊娠
1031	1	2018010218	王光爱	≥35	37	1	降调节方案	3	380	＞10天	15	＞3000	5700	HCG	3	2	1	继发不孕	1.89	≤24	20.8	男方因素	4	0.71	1130	0.78	5	7.54	4.77	46	2	9	1.14	A	ICSI	3	0	1	0	1	1	0	否	是	移植	未妊娠
201	1	C00016481	李霞	≥35	40	2	降调节方案	3	375	＞10天	12	＞3000	4500	HCG	4	1	1	继发不孕	1.34	≤24	21.8	女方因素	8	1.86	1913	1.78	8	7.46	4.78	52.36	2	9	13.6	A	IVF	0	0	0	0	0	0	0	是		无可移植胚胎
710	1	2016030027	张春兰	≥35	39	1	降调节方案	3	300	≤10天	8	≤3000	2400	HCG	2	1	1	继发不孕	2.49	＞24	25.8	不明原因	5	2.67	1641	0.99	6	11.42	4.78	31.75	2	9			IVF	5	0	1	0	1	1	0	否	是	移植	已妊娠	临床妊娠	宫内妊娠	单胚胎停
833	0	2018060139	范秋兰	≥35	35	1	降调节方案	3	150	≤10天	10	≤3000	1500	HCG	5	4	0	继发不孕	1.58	≤24	20.1	女方因素	5	1.37	1422	0.26	4	9.77	4.78	74	2	12	10.6	A	IVF	3	0	1	0	1	1	0	否	是	移植	已妊娠	临床妊娠	宫内妊娠	单胎宫内妊娠
1061	1	C00015479	李霞	≥35	39	1	拮抗剂方案	2	364.286	≤10天	7	≤3000	2550	HCG	3	1	1	继发不孕	1.41	≤24	21.8	女方因素	4	9.73	1644	0.69	3	7.46	4.78	52.36	2	9			IVF	3	0	1	0	1	1	0	否	是	移植	未妊娠
75	0	C00010935	王金凤	≥35	38	3	刺激方案	1	182.143	≤10天	7	≤3000	1275	HCG	8	2	1	继发不孕	1.72	＞24	24.4	混合因素	9	28.42	2376	2.1		9.59	4.79	40	2	8	0.56			0	0	0	0	0	0	0	是		未取卵
257	1	2017110246	田超清	≥35	38	3	刺激方案	1	337.5	≤10天	4	≤3000	1350	HCG	11	0	0	原发不孕	1.75	≤24	19	混合因素	7	1.92	2661	0.76	9	9.59	4.79	40	2	10	8.1	A	ICSI	5	0	2	0	2	2	0	否	是	移植	未妊娠
779	1	C00011284	王金凤	≥35	39	4	刺激方案	1	294.231	＞10天	13	＞3000	3825	HCG	8	2	1	继发不孕	1.69	＞24	24.4	女方因素	5	11.93	1760	1.62	4	9.59	4.79	40	2	8	5	B	IVF	3	0	2	0	0	0	0	否	否	全胚冷冻
924	1	C00007623	王金凤	≥35	38	1	降调节方案	3	373.438	＞10天	16	＞3000	5975	HCG	8	2	1	继发不孕	2.28	＞24	24.4	女方因素	4	1.09	887	0.36	2	9.59	4.79	40	2	8	0.61	B-C	IVF	1	0	0	0	0	0	0	是		无可移植胚胎
942	1	2016100096	荣静	＜35	32	1	刺激方案	1	366.667	≤10天	9	＞3000	3300	HCG	7	0	0	原发不孕	2.810	＞24	31.2	女方因素	4	1.49	804	0.51	5	9.59	4.79	40	1	8	8.4	A-B	IVF	4	0	2	0	2	2	0	否	是	移植	已妊娠	临床妊娠	宫内妊娠	单胚胎停
1524	1	C00013034	王金凤	≥35	39	5	拮抗剂方案	2	293.182	＞10天	11	＞3000	3225	HCG	8	2	1	继发不孕	2.810	＞24	24.4	混合因素	3	2.32	812	0.61	4	9.59	4.79	40	2	8	9.9	A	ICSI	3	0	2	0	0	0	0	否	否	全胚冷冻
115	0	C00010740	姜惠真	＜35	30	1	降调节方案	3	225	≤10天	10	≤3000	2250	HCG	1	0	0	原发不孕	4.29	≤24	21.6	女方因素	9	2.93	1564	1.64	7	8.7	4.8	12.06	1	18	9.4	A-B	IVF	5	0	2	0	2	2	0	否	是	移植	已妊娠	临床妊娠	宫内妊娠	双胎宫内妊娠
543	1	2018070124	李英	＜35	30	1	降调节方案	3	323.077	＞10天	13	＞3000	4200	HCG	2	0	0	原发不孕	4.42	＞24	25.6	女方因素	7	0.96	1587	0.55	8	7.41	4.8	20.74	1	35	11.8	B	IVF	7	0	6	4	2	2	0	否	是	移植	未妊娠
732	0	2016070093	史艳艳	＜35	30	1	降调节方案	3	225	＞10天	12	≤3000	2700	HCG	3	0	0	原发不孕	3.78	≤24	19.5	女方因素	5	1.12	1497.8	1.39	9	5.59	4.8	39	1	16	14.4	A	IVF	6	0	4	2	2	2	0	否	是	移植	已妊娠	临床妊娠	宫内妊娠	双胎宫内妊娠
932	0	C00018933	郭玉环	≥35	38	1	拮抗剂方案	2	225	≤10天	7	≤3000	1575	HCG	10	1	0	继发不孕	1.52	＞24	26	女方因素	4	2.64	854.39	0.62	4	7.88	4.8	52	2	11	9.3	A	IVF	3	0	2	0	2	2	0	否	是	移植	未妊娠
1216	0	2016090145	李启霞	≥35	37	2	刺激方案	1	150	≤10天	7	≤3000	1050	HCG	5	3	1	继发不孕	1.43	≤24	22.6	女方因素	4	5.29	1147.22	1.21	4	8.51	4.8	99.09	2	7	6.7	B	IVF	4	0	4	0	0	0	0	否	否	全胚冷冻
466	1	C00007585	刘岩	＜35	34	1	降调节方案	3	300	＞10天	11	＞3000	3300	HCG	3	3	1	继发不孕	2.01	＞24	26.6	女方因素	6	1.22	1846.72	0.91	6	8.95	4.81	64	1	11	0.8	A	IVF	2	2	3	1	1	1	0	否	是	移植	未妊娠
1607	1	2018040014	李玲	≥35	41	1	拮抗剂方案	2	418.421	＞10天	19	＞3000	7950	双扳机	3	3	1	继发不孕	2.24	＞24	24.7	混合因素	2	10.2	990	0.67	3	12.65	4.81	57.66	2	9	12	A	ICSI	2	0	1	1	0	0	0	否	否	全胚冷冻
230	1	C00011519	韩洋	≥35	36	5	刺激方案	1	300	≤10天	7	≤3000	2100	HCG	3	3	1	继发不孕	2.1	≤24	19.9	女方因素	5	10.67	1813	0.94	7	9.05	4.83	51	2	11	0.36	A	IVF	6	0	5	0	0	0	0	否	否	全胚冷冻
1081	0	C00018574	李兰兰	＜35	34	1	降调节方案	3	161.842	＞10天	19	＞3000	3075	HCG	5	2	0	继发不孕	2.21	＞24	29.4	女方因素	4	1.46	1535.92	0.75	4	6.45	4.83	34	1	40	13.7	A-B	IVF	2	1	3	0	2	2	0	否	是	移植	未妊娠
1886	0	2016070061	李颖	＜35	33	1	拮抗剂方案	2	282.353	＞10天	17	＞3000	4800	HCG	1	2	1	继发不孕	1.94	＞24	24.2	男方因素	2	2.61	406	0.63	2	12.79	4.83	64	1	12	10.8	A	ICSI	2	0	2	0	0	0	0	否	否	全胚冷冻
276	0	C00006718	柏宗慧	＜35	33	1	降调节方案	3	225	＞10天	11	≤3000	2475	HCG	5	0	0	原发不孕	3.99	≤24	23.1	女方因素	7	2.83	2149	0.89	5	11.63	4.84	82	1	15	1.05	A	IVF	4	0	4	0	2	2	0	否	是	移植	已妊娠	临床妊娠	宫内妊娠	单胎宫内妊娠
722	0	2017080198	孙芳	≥35	35	2	刺激方案	1	225	≤10天	7	≤3000	1575	HCG	3	1	1	继发不孕	1.28	≤24	23	女方因素	5	5.65	1561	0.89	5	8.38	4.84	43	2	12	11.2	A	IVF	3	0	2	0	0	0	0	否	否	全胚冷冻
1048	0	2017100089	金同华	≥35	46	1	刺激方案	1	225	≤10天	10	≤3000	2250	HCG	1	3	2	继发不孕	1.43	＞24	26	女方因素	4	13.03	1749	0.41	5	8.38	4.84	43	2	11	4	A	IVF	2	0	2	1	0	0	0	否	否	全胚冷冻
1355	0	2017090163	张丹	≥35	36	4	拮抗剂方案	2	214.286	＞10天	14	≤3000	3000	HCG	1	0	0	原发不孕	1.29	≤24	20.2	男方因素	3	25.43	563	0.57	1	5.07	4.84	53.76	2	6	8.8	B	ICSI	1	0	0	0	0	0	0	是		无可移植胚胎
1374	0	2016050053	薛维芳	≥35	42	4	拮抗剂方案	2	225	≤10天	5	≤3000	1125	HCG	2	2	1	继发不孕	1.69	＞24	24.9	混合因素	3	0.87	448	0.27	2	8.63	4.84	36.43	2	8	11	A	ICSI	1	0	2	0	2	2	0	否	是	移植	已妊娠	临床妊娠	宫内妊娠	单胚胎停
590	0	2017100083	苏静	≥35	35	2	降调节方案	3	225	≤10天	9	≤3000	2025	HCG	3	1	1	继发不孕	2.06	≤24	22.8	女方因素	6	0.77	1558	1.43	7	4.83	4.85	51.75	2	9	11	A	IVF	6	0	2	0	2	2	0	否	是	移植	已妊娠	临床妊娠	宫内妊娠	单胎宫内妊娠
918	1	2016030226	张敏	≥35	39	2	刺激方案	1	300	≤10天	10	≤3000	3000	HCG	5	1	0	继发不孕	4.5	＞24	29.1	不明原因	4	4.86	952	0.6	4	8.45	4.85	77.07	2	8	7.6	A	IVF	2	0	2	0	0	0	0	否	否	全胚冷冻
1217	1	2018060090	张敏	≥35	41	3	刺激方案	1	429.545	＞10天	11	＞3000	4725	HCG	5	1	0	继发不孕	1.31	＞24	29.1	不明原因	4	4.41	1143	0.72	4	9.8	4.85	77.07	2	8	6.3	B	IVF	1	0	1	0	0	0	0	否	否	全胚冷冻
486	0	C00015498	王晴晴	＜35	34	2	拮抗剂方案	2	262.5	＞10天	12	＞3000	3150	双扳机	1	1	0	继发不孕	1.35	≤24	21.5	女方因素	6	7.4	1648	0.68	2	3.95	4.86	86.43	1	8	14.9	B	IVF	2	0	2	0	2	2	0	否	是	移植	未妊娠
726	0	C00016863	王晴晴	＜35	34	4	刺激方案	1	288.462	＞10天	13	＞3000	3750	HCG	1	1	0	继发不孕	2.18	≤24	21.5	女方因素	5	1.28	1545	0.87	4	3.95	4.86	66.43	1	8	14.8	B	IVF	3	0	2	0	0	0	0	否	否	全胚冷冻
1591	1	2017050190	侯艳艳	＜35	33	1	刺激方案	1	345	≤10天	10	＞3000	3450	HCG	6	0	0	原发不孕	2.48	≤24	23.8	女方因素	3	3.43	1025	1.57	2	6.63	4.86	37	1	8	10.7	A-B	IVF	1	0	1	0	1	1	0	否	是	移植	已妊娠	生化妊娠	生化妊娠	生化妊娠
2263	0	C00016642	王晴晴	＜35	34	3	拮抗剂方案	2	262.5	＞10天	22	＞3000	5775	双扳机	1	1	0	继发不孕	1.26	≤24	21.5	混合因素	1	7.57	326	0.68	0	3.95	4.86	66.43	1	8				0	0	0	0	0	0	0	是		未取到卵
340	1	2017030246	刘春娥	≥35	38	1	刺激方案	1	352.941	＞10天	17	＞3000	6000	HCG	6	1	1	原发不孕	2.93	＞24	29.1	女方因素	7	1.64	1927	0.87	5	7.93	4.87	69	2	8	12.5	B	IVF	4	0	4	4	2	2	0	否	是	移植	已妊娠	临床妊娠	宫内妊娠	单胎宫内妊娠
498	1	C00010759	季廷芳	≥35	44	1	刺激方案	1	300	≤10天	9	≤3000	2700	HCG	2	3	1	继发不孕	2.83	≤24	23	女方因素	6	7.1	2497	0.97	5	11.76	4.87	29.8	2	9	0.41	A-B	IVF	3	0	3	3	0	0	0	否	否	全胚冷冻
1007	0	2017070126	苑纪昆	＜35	33	1	降调节方案	3	275	＞10天	12	＞3000	3300	HCG	4	0	0	原发不孕	1.34	≤24	19.7	女方因素	4	2.07	1244	1.08	4	7.77	4.87	35	1	12	12.4	A	IVF	3	0	0	0	0	0	0	是		无可移植胚胎
1273	1	2018050167	魏秀燕	≥35	38	1	刺激方案	1	375	≤10天	10	＞3000	3750	HCG	1	4	1	继发不孕	1.3	＞24	26.2	女方因素	3	15.31	860	1.19	5	13.33	4.87	55.42	2	10	6.2	B	IVF	1	0	1	0	0	0	0	否	否	全胚冷冻
1813	1	C00010981	穆金丽	≥35	40	2	降调节方案	3	405.556	＞10天	18	＞3000	7300	HCG	6	0	0	原发不孕	1.57	＞24	35.4	混合因素	2	3.13	525	0.44	0	11	4.87	23	2	8	11.2	A		0	0	0	0	0	0	0	是		未取到卵
1991	1	C00008285	穆金丽	≥35	38	1	拮抗剂方案	2	390	≤10天	10	＞3000	3900	HCG	6	0	0	原发不孕	1.55	＞24	35.4	女方因素	2	10.67	486	0.62	2	11	4.87	23	2	8	9.6	A	IVF	1	0	1	1	0	0	0	否	否	全胚冷冻
28	0	C00011900	刘如芳	≥35	37	2	降调节方案	3	240	≤10天	10	≤3000	2400	HCG	4	3	0	继发不孕	2.66	＞24	32	女方因素	9	0.8	1836	0.31	6	9.19	4.88	52	2	14	1.02	A	IVF	0	0	0	0	0	0	0	是		无可移植胚胎
749	1	C00010075	杨旭	＜35	29	1	刺激方案	1	300	≤10天	10	≤3000	3000	HCG	2	0	0	原发不孕	1.884	≤24	20.4	男方因素	5	6.82	1401	0.86	5	10.56	4.88	29	1	13	0.81	B	ICSI	3	0	2	1	0	0	0	否	否	全胚冷冻
139	0	2017110016	刘福银	＜35	33	1	降调节方案	3	150	≤10天	10	≤3000	1500	HCG	4	2	0	继发不孕	3.92	≤24	24	女方因素	8	3.12	2320	0.54	9	5.34	4.89	45	1	16	10.7	A-B	IVF	5	0	3	0	0	0	0	否	否	全胚冷冻
898	1	C00013097	张红芹	＜35	32	2	拮抗剂方案	2	325	≤10天	10	＞3000	3250	HCG	3	2	0	继发不孕	2.27	＞24	25.4	女方因素	5	2.63	1050	0.64	6	9.41	4.89	61	1	16	10.3	A	IVF	0	0	0	0	0	0	0	是		无可移植胚胎
1300	0	2016070078	刘莹	＜35	28	3	刺激方案	1	225	≤10天	8	≤3000	1800	HCG	4	1	0	继发不孕	1.86	＞24	29.3	女方因素	3	5.23	779	0.69	3	6.8	4.89	51	1	6	13.5	A	IVF	2	0	1	1	0	0	0	否	否	全胚冷冻
1506	1	2016050021	王凤	＜35	33	3	降调节方案	3	381.25	＞10天	12	＞3000	4575	HCG	5	0	0	原发不孕	2.78	≤24	19.5	女方因素	3	3.95	928	1.33	3	12.9	4.89	86.43	1	10	14.5	A-B	IVF	1	0	2	0	2	2	0	否	是	移植	未妊娠
1998	1	2017090153	杨云云	＜35	34	4	刺激方案	1	375	＞10天	12	＞3000	4500	HCG	2	1	1	继发不孕	1.26	≤24	23.4	男方因素	2	3.88	490	0.49	3	5.34	4.89	45	1	6	11.9	A	ICSI	2	0	1	0	0	0	0	否	否	全胚冷冻
446	1	C00014606	王洪丽	≥35	36	1	刺激方案	1	300	≤10天	7	≤3000	2100	HCG	8	1	0	继发不孕	1.82	≤24	20	混合因素	6	7.01	1824	1.41	8	6.35	4.9	65	2	11	0.8	B	ICSI	4	0	4	0	0	0	0	否	否	全胚冷冻
716	0	2016110046	任玉莲	＜35	32	1	降调节方案	3	282.692	＞10天	13	＞3000	3675	HCG	4	0	0	原发不孕	2.85	＞24	25.3	女方因素	5	1.26	1603	1.56	8	8.21	4.9	46.43	1	12	10.7		IVF	6	0	4	1	0	0	0	否	否	全胚冷冻
1280	0	C00008525	张芹	＜35	32	2	降调节方案	3	233.654	＞10天	13	＞3000	3037.5	HCG	4	1	1	继发不孕	2.76	≤24	20	混合因素	3	1.78	848	0.67	1	10.64	4.9	52	1	11	9.2	A	ICSI	1	0	0	0	0	0	0	是		无可移植胚胎
1781	1	2016120006	李平	＜35	34	1	降调节方案	3	511.364	＞10天	11	＞3000	5625	HCG	5	0	0	原发不孕	1.84	＞24	25.9	女方因素	2	2.85	580	0.48	1	9.9	4.9	40.37	1	7	12.8	A	IVF	1	0	0	0	0	0	0	是		无可移植胚胎
1966	1	2016110236	罗锦旻	≥35	40	1	降调节方案	3	410.294	＞10天	17	＞3000	6975	HCG	2	1	0	继发不孕	2.91	≤24	17.2	混合因素	2	5.9	469	2.67	2	11.9	4.9	40.37	2	6	9.6	A-B	ICSI	4	0	1	0	0	0	0	否	否	全胚冷冻
208	1	2017060196	杨磊	≥35	37	2	刺激方案	1	311.538	＞10天	13	＞3000	4050	HCG	14	0	0	原发不孕	2.41	＞24	28	女方因素	8	0.86	1832	0.78	7	8.83	4.91	31.75	2	15	14.7	A	IVF	7	0	2	0	2	2	0	否	是	移植	未妊娠
274	1	2016040287	段凯英	≥35	40	3	刺激方案	1	375	≤10天	6	≤3000	2250	HCG	2	1	1	继发不孕	1.64	≤24	22.9	混合因素	7	3.39	2164	0.75	7	7.67	4.91	40	2	13	6.2	A	ICSI	5	0	1	0	0	0	0	否	否	全胚冷冻
364	0	2016110275	杨磊	≥35	37	1	降调节方案	3	242.308	＞10天	13	＞3000	3150	HCG	14	0	0	原发不孕	1.67	＞24	28	女方因素	7	1.23	1773	0.97	6	8.83	4.91	51.75	2	15	18.3	A-B	IVF	4	0	1	1	0	0	0	否	否	全胚冷冻
1851	0	2018050057	闫春华	≥35	36	1	刺激方案	1	225	≤10天	7	≤3000	1575	HCG	3	1	1	继发不孕	1.80	＞24	27	女方因素	2	8.88	422	0.5	3	10.4	4.91	93.36	2	7	8.4	A	IVF	1	0	1	0	0	0	0	否	否	全胚冷冻
35	1	C00003369	周春艳	≥35	40	2	降调节方案	3	300	＞10天	14	＞3000	4200	HCG	3	2	0	继发不孕	1.86	≤24	20.3	女方因素	9	1.07	1443	1.42	5	5.93	4.92	53.77	2	11	12.1	A	IVF	3	0	3	2	2	2	0	否	是	移植	未妊娠
318	1	2016080142	侯喜春	＜35	31	2	刺激方案	1	354.545	＞10天	11	＞3000	3900	HCG	1	0	0	原发不孕	1.31	≤24	20.9	混合因素	7	3.54	2187	0.7	6	10.64	4.92	40	1	11	17	A-B	ICSI	4	0	2	0	0	0	0	否	否	全胚冷冻
347	1	2018020002	周春艳	≥35	39	1	刺激方案	1	316.667	≤10天	9	≤3000	2850	HCG	3	2	0	继发不孕	1.21	≤24	20.3	不明原因	7	14.83	1864	2.22	7	5.93	4.92	43.77	2	11	7.3	B	IVF	1	0	1	0	0	0	0	否	否	全胚冷冻
403	1	C00004863	王圆圆	＜35	29	1	拮抗剂方案	2	314.286	＞10天	14	＞3000	4400	HCG	3	2	0	继发不孕	2.52	≤24	22.3	女方因素	7	1.09	1283	0.33	8	10.41	4.92	75	1	15	10.6	A	IVF	5	0	2	1	2	2	0	否	是	移植	已妊娠	临床妊娠	宫外妊娠	异位妊娠
916	0	C00015892	郝黎黎	≥35	37	2	拮抗剂方案	2	200	≤10天	9	≤3000	1800	HCG	6	1	0	继发不孕	2.04	≤24	21	女方因素	4	4.05	955	1.42	3	8.15	4.92	41.2	2	9	0.94	A	IVF	3	0	2	0	2	2	0	否	是	移植	未妊娠
1254	1	2016070130	刘晓黎	≥35	35	1	刺激方案	1	300	≤10天	8	≤3000	2400	HCG	3	2	1	继发不孕	1.35	≤24	21.6	女方因素	3	2.54	904	0.77	4	8.63	4.92	25	2	7	10	A	IVF	2	0	2	1	0	0	0	否	否	全胚冷冻
2120	1	2018040196	侯喜春	＜35	33	3	降调节方案	3	450	≤10天	10	＞3000	4500	HCG	3	0	0	原发不孕	2.7	≤24	20.9	男方因素	1	1.42	434	0.41	2	10.64	4.92	40	1	8	13.9	A	ICSI	2	0	1	0	0	0	0	否	否	全胚冷冻
2275	1	2016120102	刘晓黎	≥35	36	2	刺激方案	1	300	≤10天	7	≤3000	2100	HCG	3	2	1	继发不孕	2.19	≤24	21.6	女方因素	5	2.87	1206	0.09	5	8.63	4.92	25	2	7			IVF	2	0	2	0	0	0	0	否	否	全胚冷冻
459	0	2017110020	全玉荣	≥35	36	1	降调节方案	3	200	＞10天	12	≤3000	2400	HCG	3	1	0	继发不孕	5.75	≤24	23.7	女方因素	6	2.87	1698	2.03	8	5.94	4.94	35.42	2	15	9.9	A	IVF	8	0	4	1	0	0	0	否	否	全胚冷冻
603	0	C00004703	孙雪	＜35	32	1	降调节方案	3	287.5	＞10天	12	＞3000	3450	HCG	2	2	0	继发不孕	2.3	＞24	24.6	女方因素	6	1	1470	0.81	4	6.63	4.94	41.76	1	11	9.7	A	IVF	2	0	0	0	2	2	0	否	是	移植	已妊娠	临床妊娠	宫内妊娠	双胎宫内妊娠
454	0	2018010182	赵艳芳	≥35	36	1	降调节方案	3	218.182	＞10天	11	≤3000	2400	HCG	3	1	1	继发不孕	1.79	≤24	22.9	男方因素	6	1.9	1761	0.73	5	7.06	4.95	45.08	2	12	12.5	A	IVF	1	0	1	0	1	1	0	否	是	移植	未妊娠
472	0	2017080268	仪美娟	≥35	36	1	降调节方案	3	256.25	≤10天	10	≤3000	2562.5	HCG	1	3	1	继发不孕	1.62	＞24	24.2	不明原因	6	3.77	1798	0.8	9	9.12	4.95	76.43	2	12	11	B	ICSI	6	0	2	2	0	0	0	否	否	全胚冷冻
490	0	2018070073	赵艳芳	≥35	36	2	刺激方案	1	120	＞10天	15	≤3000	1800	HCG	3	1	1	继发不孕	3.8	≤24	22.9	女方因素	6	5.51	2577	1.01	5	7.06	4.95	45.08	2	12	6.3	A	IVF	0	0	0	0	0	0	0	是		未受精
1095	1	2018050136	贺倩倩	＜35	26	1	拮抗剂方案	2	425	≤10天	8	＞3000	3400	HCG	1	0	0	原发不孕	1.8	≤24	23.7	混合因素	4	2.36	1457	0.79	4	15.2	4.95	76.46	1	6	13.5	A	ICSI	2	0	2	1	0	0	0	否	否	全胚冷冻
1461	1	C00005229	贺倩倩	＜35	27	2	拮抗剂方案	2	485.714	≤10天	7	＞3000	3400	HCG	1	0	0	原发不孕	1.8	≤24	23.7	混合因素	3	5.96	961	1.71	5	15.2	4.95	76.46	1	6	13.2	A-B	ICSI	4	0	2	2	2	2	0	否	是	移植	已妊娠	临床妊娠	宫内妊娠	单胎宫内妊娠
7	0	2017110216	陈晓花	≥35	42	2	降调节方案	3	180.769	＞10天	13	≤3000	2350	HCG	2	1	1	继发不孕	1.81	＞24	26.2	女方因素	10	1.3	2099	0.84	9	9.76	4.96	69.5	2	13	15.1	A	IVF	4	0	2	0	2	2	0	否	是	移植	未妊娠
167	0	2017040178	陈晓花	≥35	41	1	降调节方案	3	225	≤10天	10	≤3000	2250	HCG	2	1	1	继发不孕	2.43	＞24	26.2	女方因素	8	2.4	2640	1.67	6	9.76	4.96	69.5	2	13	14.1	A	IVF	4	0	2	0	0	0	0	否	否	全胚冷冻
1023	1	2016030216	孙蕾	≥35	37	2	刺激方案	1	375	≤10天	7	≤3000	2625	HCG	3	2	0	继发不孕	2.95	≤24	19.5	不明原因	4	3.86	1180	0.62	4	7.2	4.96	46.43	2	10			IVF	3	0	2	1	2	2	0	否	是	移植	未妊娠
1937	0	2018010126	张玉清	≥35	36	1	刺激方案	1	287.5	＞10天	12	＞3000	3450	HCG	3	1	1	继发不孕	1.92	≤24	20	男方因素	2	12.96	422	0.46	1	5.72	4.96	58.4	2	7	5.8	B	IVF	0	0	0	0	0	0	0	是		无可移植胚胎
517	1	2016080101	张兰	≥35	40	1	刺激方案	1	300	≤10天	7	≤3000	2100	HCG	17	0	0	原发不孕	1.74	≤24	19.5	混合因素	6	1.54	2282	0.68	5	8.18	4.97	73.7	2	10	11.8	A	ICSI	3	0	2	1	2	2	0	否	是	移植	未妊娠
787	0	2017030158	张兰	≥35	40	3	降调节方案	3	205	≤10天	10	≤3000	2050	HCG	17	0	0	原发不孕	2.680	≤24	19.5	混合因素	5	4.2	1692	0.54	5	8.18	4.97	73.7	2	10	11.3	A	ICSI	3	0	2	0	2	2	0	否	是	移植	未妊娠
1213	0	2017110106	王慧慧	＜35	28	1	降调节方案	3	215.625	≤10天	8	≤3000	1725	HCG	5	0	0	原发不孕	1.42	≤24	21.1	女方因素	4	2.67	1159	0.95	3	6.42	4.97	26.43	1	8	9.7	A	IVF	2	0	2	2	2	2	0	否	是	移植	已妊娠	临床妊娠	宫内妊娠	双胎宫内妊娠
1376	1	2016120124	张兰	≥35	40	2	刺激方案	1	300	≤10天	7	≤3000	2100	HCG	17	0	0	原发不孕	2.49	≤24	19.5	混合因素	3	7.49	437	0.69	3	8.18	4.97	73.7	2	10	10	B	ICSI	1	0	1	0	1	1	0	否	是	移植	未妊娠
1547	0	C00015504	邓秀芝	≥35	42	1	拮抗剂方案	2	225	≤10天	8	≤3000	1800	HCG	1	3	1	继发不孕	1.38	≤24	21.5	女方因素	3	4.58	1165	1.09	4	10.63	4.98	76.43	2	8	1.14	A-B	IVF	1	0	2	0	2	2	0	否	是	移植	未妊娠
280	1	C00013070	王玮玮	≥35	39	2	刺激方案	1	375	＞10天	12	＞3000	4500	HCG	6	1	1	继发不孕	1.69	≤24	23.4	女方因素	7	3.63	2114	0.85	8	13.11	4.99	52	2	11	1.45	A	IVF	6	0	2	0	2	2	0	否	是	移植	未妊娠
529	0	C00015427	王玮玮	≥35	39	3	刺激方案	1	285	≤10天	10	≤3000	2850	HCG	6	1	1	继发不孕	1.30	≤24	23.4	女方因素	6	4.04	2146	0.85	5	13.11	4.99	52	2	11	1.5	A	IVF	3	0	2	0	2	2	0	否	是	移植	未妊娠
1262	1	C00015627	姜婷婷	＜35	31	2	拮抗剂方案	2	359.375	≤10天	8	≤3000	2875	HCG	1	2	0	继发不孕	1.76	≤24	18	女方因素	3	3.91	886	1.29	3	13.37	4.99	53	1	10	10.4	A	IVF	3	0	2	2	0	0	0	否	否	全胚冷冻
1437	1	C00010898	王玮玮	≥35	38	1	刺激方案	1	400	≤10天	9	＞3000	3600	HCG	6	1	1	继发不孕	1.42	≤24	23.4	女方因素	3	6.41	934.4	0.83	5	13.11	4.99	52	2	11	0.87	A	IVF	3	0	2	1	0	0	0	否	否	全胚冷冻
1559	1	C00012967	李素霞	＜35	34	1	拮抗剂方案	2	320.833	≤10天	9	≤3000	2887.5	HCG	10	1	1	继发不孕	1.48	＞24	27.3	女方因素	3	5.47	1136	0.95	4	7.42	4.99	61	1	9	152	B	IVF	0	0	0	0	0	0	0	是		无可移植胚胎
2015	1	C00014845	姜婷婷	＜35	31	1	拮抗剂方案	2	300	≤10天	9	≤3000	2700	双扳机	1	2	0	继发不孕	1.79	≤24	18	女方因素	1	2.9	824	0.69	1	13.37	4.99	53	1	7	9.8	A	IVF	1	0	1	0	0	0	0	否	否	全胚冷冻
109	0	C00006052	孙静静	＜35	28	1	降调节方案	3	201.562	＞10天	16	＞3000	3225	HCG	2	0	0	原发不孕	1.58	＞24	27.1	女方因素	9	1.25	1837	0.67	5	3.58	5	37	1	32	9.2	A	IVF	4	0	1	1	1	1	0	否	是	移植	未妊娠
166	0	C00010251	赵雷雷	＜35	30	1	拮抗剂方案	2	277.5	≤10天	10	≤3000	2775	HCG	1	3	0	继发不孕	2.74	＞24	26.4	女方因素	6	2.27	1309	0.92	9	6.46	5	26.97	1	12	1.5	B	IVF	5	0	5	1	2	2	0	否	是	移植	已妊娠	临床妊娠	宫内妊娠	单胎宫内妊娠
390	0	C00016033	刘婷	＜35	30	1	降调节方案	3	245.455	＞10天	11	≤3000	2700	HCG	2	0	0	原发不孕	2.47	≤24	19.9	女方因素	7	1.26	1488	0.89	7	11.55	5	40	1	14	13.5	A	IVF	4	0	2	0	2	2	0	否	是	移植	已妊娠	临床妊娠	宫内妊娠	双胎宫内妊娠
1398	1	C00007403	吕军迎	≥35	41	1	拮抗剂方案	2	316.667	≤10天	9	≤3000	2850	HCG	6	3	1	继发不孕	2.59	≤24	19.5	女方因素	3	5.11	887	1.06	6	14.81	5	64	2	12	4.4	A	IVF	1	0	1	0	0	0	0	否	否	全胚冷冻
1527	1	C00012703	邢芸	＜35	30	4	刺激方案	1	356.25	≤10天	8	≤3000	2850	HCG	3	1	1	继发不孕	2.76	≤24	21.5	男方因素	3	3.86	804	1.19	3	7.55	5	40	1	12	0.62	B	ICSI	2	0	1	0	0	0	0	否	否	全胚冷冻
332	0	C00018270	郭爽爽	＜35	33	1	降调节方案	3	195	≤10天	10	≤3000	1950	HCG	2	0	0	原发不孕	1.58	＞24	25.2	女方因素	7	3.79	2036.82	0.77	5	5.73	5.01	36.43	1	8	10.2	A	IVF	4	0	2	1	2	2	0	否	是	移植	未妊娠
522	0	C00010744	许凤梅	＜35	31	1	降调节方案	3	279.545	＞10天	11	＞3000	3075	HCG	2	0	0	原发不孕	2.01	＞24	27.3	女方因素	6	0.76	2216	0.62	7	7.86	5.01	24	1	32	0.87	B	IVF	2	0	2	0	2	2	0	否	是	移植	未妊娠
1383	1	C00004677	刘秋霞	≥35	40	2	刺激方案	1	305.357	＞10天	14	＞3000	4275	HCG	1	2	0	继发不孕	2.12	＞24	29.6	女方因素	3	1.33	302	1.94	1	7.64	5.01	35.42	2	7	1	A-B	IVF	0	0	0	0	0	0	0	是		无可移植胚胎
867	0	2016050022	张芳	＜35	29	1	降调节方案	3	245.455	＞10天	11	≤3000	2700	HCG	1	4	0	继发不孕	2.71	≤24	20.9	女方因素	5	0.37	1203	1.45	4	6.79	5.02	31.76	1	10	10.6	A	IVF	2	0	2	1	2	2	0	否	是	移植	已妊娠	临床妊娠	宫内妊娠	双胎宫内妊娠
26	0	2016070024	杨学娟	＜35	30	1	降调节方案	3	204.545	＞10天	11	≤3000	2250	HCG	6	0	0	原发不孕	2.13	≤24	20.9	混合因素	10	3.37	1641	0.87	9	5.72	5.03	99.86	1	11			ICSI	6	0	4	1	2	2	0	否	是	移植	未妊娠
70	1	2018070108	任玉娟	≥35	38	1	刺激方案	1	322.5	≤10天	10	＞3000	3225	HCG	6	2	0	继发不孕	1.96	＞24	24.6	女方因素	7	12.37	2158	1.98	5	10.26	5.03	46.43	2	10	4.2	B	IVF	5	0	5	4	0	0	0	否	否	全胚冷冻
891	0	C00004056	孙青	＜35	28	1	降调节方案	3	242.308	＞10天	13	＞3000	3150	HCG	3	0	0	原发不孕	3.87	≤24	22.3	混合因素	5	1.48	1066	0.98	2	7.91	5.03	21.47	1	16	10.6	A	ICSI	1	0	1	0	1	1	0	否	是	移植	未妊娠
1030	0	2016060187	张倩	＜35	24	1	刺激方案	1	225	≤10天	10	≤3000	2250	HCG	4	0	0	原发不孕	1.34	＞24	24.8	女方因素	4	0.51	1143	3.87	3	7.33	5.03	46	1	8	17	B	IVF	0	0	0	0	0	0	0	是		未受精
1201	1	2016090254	张倩	＜35	24	2	刺激方案	1	407.143	＞10天	14	＞3000	5700	HCG	4	0	0	原发不孕	2.340	＞24	24.8	混合因素	4	4.27	1047	1.42	3	7.33	5.03	46	1	8	11	A	ICSI	1	0	0	0	0	0	0	是		无可移植胚胎
358	0	C00017455	吴晓燕	≥35	37	2	拮抗剂方案	2	225	≤10天	9	≤3000	2025	HCG	1	3	0	继发不孕	1.85	≤24	18.8	混合因素	7	3.1	1819	1.06	6	7.16	5.04	44	2	11	13.3	A	ICSI	4	0	4	1	0	0	0	否	否	全胚冷冻
1109	1	C00003620	曹丽伟	≥35	37	1	拮抗剂方案	2	344.231	＞10天	13	＞3000	4475	HCG	1	0	0	原发不孕	1.24	≤24	23.4	混合因素	4	2.04	1407	0.76	3	10.42	5.04	40.7	2	6	15	A	ICSI	3	0	2	0	0	0	0	否	否	全胚冷冻
515	0	2017010098	宗军燕	≥35	39	1	刺激方案	1	225	≤10天	10	≤3000	2250	HCG	1	1	1	继发不孕	1.78	≤24	21.9	女方因素	6	1.72	2291	1.36	6	8.27	5.05	73.4	2	15	15.7	B	IVF	3	0	2	0	2	2	0	否	是	移植	未妊娠
672	1	C00011786	毕志娜	＜35	33	1	刺激方案	1	300	≤10天	9	≤3000	2700	HCG	3	2	0	继发不孕	1.5	≤24	20.8	女方因素	5	13.67	1877	1.2	5	10.73	5.05	42	1	10	0.65	B	IVF	5	0	4	1	0	0	0	否	否	全胚冷冻
228	0	2016060102	丁莎	＜35	30	1	降调节方案	3	150	＞10天	12	≤3000	1800	HCG	3	0	0	原发不孕	3.2	≤24	22	女方因素	8	1.17	1416	0.97	7	9.13	5.06	65.69	1	10	10.4	A-B	IVF	5	0	4	2	2	2	0	否	是	移植	已妊娠	临床妊娠	宫内妊娠	单胎宫内妊娠
668	0	2016110152	王福秀	≥35	41	1	降调节方案	3	225	≤10天	6	≤3000	1350	HCG	1	4	1	继发不孕	1.54	≤24	20.2	混合因素	5	10.11	1415	0.59	7	10.82	5.06	46.43	2	22	8.9	A	ICSI	3	0	4	0	2	2	0	否	是	移植	已妊娠	临床妊娠	宫内妊娠	单胚胎停
98	0	2017080071	代倩倩	＜35	28	1	降调节方案	3	225	＞10天	14	＞3000	3150	HCG	2	0	0	原发不孕	3.29	≤24	22.9	混合因素	9	4.49	1936	1.73	9	9.49	5.07	36.43	1	16	11.5	A	ICSI	5	0	2	0	0	0	0	否	否	全胚冷冻
440	0	2018020102	代倩倩	＜35	29	2	降调节方案	3	275	＞10天	12	＞3000	3300	HCG	2	0	0	原发不孕	2.6	≤24	22.9	男方因素	6	1.71	1729	1.51	7	9.49	5.07	36.43	1	16	14.7	A	ICSI	6	0	3	1	0	0	0	否	否	全胚冷冻
935	1	C00018863	张真	＜35	32	1	拮抗剂方案	2	354.545	＞10天	11	＞3000	3900	HCG	1	1	0	继发不孕	1.52	≤24	22.2	女方因素	4	0.31	836.18	0.66	4	6.14	5.07	35.37	1	11	9.8	B	IVF	2	0	2	1	0	0	0	否	否	全胚冷冻
729	0	2017080224	张文文	＜35	28	1	降调节方案	3	217.5	≤10天	10	≤3000	2175	HCG	3	2	0	继发不孕	2.29	≤24	19.6	女方因素	5	2.69	1512	0.87	6	10.71	5.08	79.82	1	13	15.5	A-B	IVF	6	0	4	2	2	2	0	否	是	移植	已妊娠	临床妊娠	宫内妊娠	单胎宫内妊娠
1241	1	C00018004	黄静华	≥35	41	1	拮抗剂方案	2	350	≤10天	7	≤3000	2450	HCG	7	2	1	继发不孕	1.77	≤24	20.9	男方因素	3	5.18	934.4	0.456	4	12.68	5.08	40	2	12	10.9	A-B	ICSI	1	0	0	0	0	0	0	是		无可移植胚胎
1116	0	C00007561	廖淑芳	≥35	43	1	刺激方案	1	287.5	＞10天	12	＞3000	3450	HCG	3	1	1	继发不孕	1.2	＞24	30.4	女方因素	4	4.52	1390	0.67	5	6.54	5.09	47	2	8	0.68	B-C	IVF	2	0	2	1	0	0	0	否	否	全胚冷冻
95	0	2016010146	郝雅彬	＜35	33	1	降调节方案	3	200	≤10天	7	≤3000	1400	HCG	2	2	0	继发不孕	2.29	≤24	21.4	女方因素	9	13.02	1944	1.3	4	5.54	5.1	49.09	1	14	9	A	IVF	3	0	2	0	2	2	0	否	是	移植	未妊娠
140	0	2016120165	李贞	≥35	38	1	刺激方案	1	200	≤10天	9	≤3000	1800	HCG	8	0	0	原发不孕	2.8	≤24	22.6	混合因素	8	1.78	2290	1.16	6	6.67	5.1	49	2	11	10	A-B	ICSI	5	0	2	0	2	2	0	否	是	移植	未妊娠
317	0	C00008493	刘传英	≥35	40	1	降调节方案	3	225	≤10天	10	≤3000	2250	HCG	5	2	1	继发不孕	1.86	≤24	19.5	女方因素	7	1.06	2188	0.97	8	7.32	5.1	27.83	2	16	0.81	A	IVF	4	0	2	0	2	2	0	否	是	移植	未妊娠
689	1	C00018167	李冬雪	＜35	29	2	刺激方案	1	300	≤10天	8	≤3000	2400	HCG	2	0	0	原发不孕	2.33	≤24	21.5	男方因素	5	10.54	1771	2.47	6	7.6	5.1	46.98	1	15	0.64	A	ICSI	3	0	2	0	0	0	0	否	否	全胚冷冻
755	1	C00012570	邵会会	≥35	37	1	拮抗剂方案	2	340.385	＞10天	13	＞3000	4425	HCG	3	2	1	继发不孕	2.86	＞24	25.2	女方因素	5	3.25	1363	1.29	6	11.18	5.1	39	2	12	11.8	A	IVF	4	0	4	4	2	2	0	否	是	移植	已妊娠	临床妊娠	宫内妊娠	单胚胎停
952	1	C00017583	张柳柳	＜35	27	1	降调节方案	3	300	≤10天	9	≤3000	2700	HCG	1	1	0	继发不孕	2.42	≤24	20.2	女方因素	4	0.17	685	1.31	5	8.69	5.1	27	1	15	12	A	IVF	5	0	1	1	1	1	0	否	是	移植	已妊娠	临床妊娠	宫内妊娠	单胎宫内妊娠
176	0	2016080187	马娜娜	＜35	31	2	降调节方案	3	277.5	≤10天	10	≤3000	2775	HCG	2	2	0	继发不孕	1.27	≤24	20	女方因素	8	0.58	2383	1.91	8	6.06	5.11	51	1	11	14	B	IVF	7	0	3	1	0	0	0	否	否	全胚冷冻
345	0	C00018353	王靖	≥35	39	1	拮抗剂方案	2	275	≤10天	8	≤3000	2200	HCG	1	0	0	原发不孕	1.92	≤24	22	女方因素	7	10.03	1872.97	1.29	6	12.08	5.11	77.62	2	10	9.2	A	IVF	3	0	0	0	0	0	0	是		无可移植胚胎
96	0	2017060274	齐雯雯	＜35	31	1	降调节方案	3	248.214	＞10天	21	＞3000	5212.5	HCG	4	0	0	原发不孕	2.26	≤24	22.2	女方因素	9	1.65	1936	0.56	9	7.07	5.12	49	1	31	10	B	IVF	3	0	2	1	0	0	0	否	否	全胚冷冻
589	1	C00018127	陈娟	≥35	36	2	拮抗剂方案	2	375	≤10天	9	＞3000	3375	HCG	4	0	0	原发不孕	1.51	≤24	20.2	男方因素	6	2.58	1581.78	0.67	4	7.14	5.12	79	2	11	13	A-B	ICSI	2	0	0	0	0	0	0	是		无可移植胚胎
51	1	C00015149	李金妍	＜35	29	1	拮抗剂方案	2	300	≤10天	7	≤3000	2100	HCG	2	0	0	原发不孕	1.38	≤24	22.6	女方因素	9	7.19	2983	1.2	9	8.32	5.13	39	1	18	9.3	A	IVF	5	0	4	1	2	2	0	否	是	移植	未妊娠
777	0	C00018201	马文爽	≥35	35	2	刺激方案	1	150	＞10天	11	≤3000	1650	HCG	7	0	0	原发不孕	1.2	≤24	18.7	混合因素	5	1.34	1771	0.68	2	7.23	5.13	69.09	2	5	10.2	A-B	ICSI	1	0	1	0	0	0	0	否	否	全胚冷冻
856	0	2017080217	颜红	＜35	27	3	降调节方案	3	150	＞10天	12	≤3000	1800	HCG	2	0	0	原发不孕	1.86	＞24	25.3	混合因素	5	0.69	1285	0.58	4	7.67	5.13	34.67	1	7	12.3	A	ICSI	4	0	2	0	2	2	0	否	是	移植	已妊娠	临床妊娠	宫内妊娠	单胎宫内妊娠
2086	0	C00017938	马文爽	≥35	35	1	刺激方案	1	150	＞10天	11	≤3000	1650	HCG	7	0	0	原发不孕	1.2	≤24	18.7	混合因素	1	3.67	502	0.49	1	7.23	5.13	69.09	2	5	7.5	B	ICSI	1	0	1	0	0	0	0	否	否	全胚冷冻
42	1	C00007900	张豪丽	＜35	29	1	降调节方案	3	317.308	＞10天	13	＞3000	4125	HCG	4	0	0	原发不孕	1.9	≤24	20	女方因素	9	3.59	2208	1.14	7	4.89	5.14	49	1	9	1.11	A	IVF	6	0	2	0	2	2	0	否	是	移植	未妊娠
334	1	C00012589	李倩	＜35	34	2	降调节方案	3	302.5	≤10天	10	＞3000	3025	HCG	6	0	0	原发不孕	2.345	≤24	18.6	混合因素	7	2.07	2011	1.21	6	7.26	5.14	46	1	14	9.5	A	ICSI	5	0	3	3	2	2	0	否	是	移植	已妊娠	临床妊娠	宫内妊娠	双胎宫内妊娠
356	1	C00016799	张莹莹	≥35	39	1	拮抗剂方案	2	354.545	＞10天	11	＞3000	3900	HCG	6	1	0	继发不孕	1.84	＞24	33.5	女方因素	7	2.91	1823	1.87	5	5.84	5.14	36	2	9	14.4	A-B	IVF	2	0	0	0	0	0	0	是		无可移植胚胎
1477	1	2016110165	曹洪芹	≥35	44	4	刺激方案	1	300	≤10天	7	≤3000	2100	HCG	1	2	1	继发不孕	1.28	＞24	24.4	女方因素	3	0.94	883.58	0.76	4	9.49	5.15	39.09	2	8	6.9	A	IVF	4	0	2	1	0	0	0	否	否	全胚冷冻
1573	0	2018020020	朱烨	＜35	32	1	降调节方案	3	181.25	＞10天	12	≤3000	2175	HCG	3	0	0	原发不孕	2.75	≤24	21.1	女方因素	3	9.37	1072	0.98	5	7.24	5.15	42.29	1	12	14	A	IVF	4	0	4	0	0	0	0	否	否	全胚冷冻
32	0	2018050106	沈丽丽	＜35	24	1	降调节方案	3	173.077	＞10天	13	≤3000	2250	HCG	3	0	0	原发不孕	2.47	≤24	21.5	男方因素	9	0.78	1586	1.77	8	7.48	5.16	47.71	1	16	14	A	ICSI	3	0	1	0	1	1	0	否	是	移植	已妊娠	临床妊娠	宫内妊娠	单胚胎停
521	0	C00018401	王灿灿	＜35	32	1	刺激方案	1	200	≤10天	7	≤3000	1400	HCG	3	0	0	原发不孕	1.81	≤24	19.4	男方因素	6	8.91	2234.34	1.11	7	5.76	5.17	71.94	1	14	9.8	A-B	ICSI	3	1	3	0	0	0	0	否	否	全胚冷冻
701	1	C00012239	陈雪	＜35	34	1	拮抗剂方案	2	362.5	≤10天	8	≤3000	2900	HCG	2	1	0	继发不孕	1.61	≤24	23.7	女方因素	5	6.59	1684	0.97	6	8	5.17	32	1	9	12.3	A	IVF	1	0	1	0	1	1	0	否	是	移植	已妊娠	临床妊娠	宫内妊娠	单胎宫内妊娠
746	1	C00011886	陈普杰	＜35	34	1	拮抗剂方案	2	343.75	＞10天	12	＞3000	4125	HCG	4	1	1	继发不孕	1.32	≤24	20	女方因素	5	3.69	1418	1.08	4	9.31	5.19	26	1	6	0.78	A	IVF	2	0	2	0	2	2	0	否	是	移植	未妊娠
1541	1	C00012825	陈普杰	＜35	34	2	拮抗剂方案	2	318.75	＞10天	12	＞3000	3825	HCG	4	1	1	继发不孕	1.61	≤24	20	混合因素	3	0.65	1173	1.38	4	9.31	5.19	26	1	6	8.7	A	ICSI	3	0	3	0	2	2	0	否	是	移植	未妊娠
348	0	C00005964	毛文静	＜35	31	1	降调节方案	3	181.25	＞10天	12	≤3000	2175	HCG	3	0	0	原发不孕	2.75	≤24	19.8	女方因素	7	1.3	1860	1.52	7	8.25	5.2	37	1	12	1.33	A	IVF	6	0	2	1	2	2	0	否	是	移植	已妊娠	临床妊娠	宫内妊娠	双胎宫内妊娠
533	1	2018050145	张慧敏	＜35	33	1	降调节方案	3	419.118	＞10天	17	＞3000	7125	HCG	3	0	0	原发不孕	2.42	≤24	19.5	不明原因	6	2.48	2084	0.99	6	5.19	5.2	53.77	1	9	13.6	A-B	IVF	6	0	3	0	0	0	0	否	否	全胚冷冻
706	0	C00004417	赵茹	＜35	27	1	降调节方案	3	218.182	＞10天	11	≤3000	2400	HCG	1	0	0	原发不孕	1.46	≤24	17.1	女方因素	5	1.57	1666	1.44	5	13.28	5.2	60	1	8	13.2	A	IVF	4	0	4	2	2	2	0	否	是	移植	未妊娠
1975	1	C00012531	田金花	≥35	41	3	刺激方案	1	300	＞10天	12	＞3000	3600	HCG	5	2	0	继发不孕	2.26	≤24	21.4	不明原因	2	7.41	435	0.93	3	9.19	5.2	76.43	2	6	0.9	B-C	IVF	0	0	0	0	0	0	0	是		无可移植胚胎
327	0	2017030147	岳甜甜	＜35	29	1	降调节方案	3	262.5	＞10天	14	＞3000	3675	HCG	1	3	0	继发不孕	2.3	＞24	25.6	女方因素	7	2.19	2120	0.57	4	11.34	5.21	27	1	9	12.3	A	IVF	4	0	4	1	2	2	0	否	是	移植	已妊娠	临床妊娠	宫内妊娠	单胚胎停
330	0	2016090010	张美荣	≥35	37	1	降调节方案	3	162.5	＞10天	12	≤3000	1950	HCG	6	3	2	继发不孕	1.97	＞24	28.5	女方因素	9	0.88	2608	0.76	9	7.45	5.21	86.43	2	15	15.4	A	IVF	8	0	6	2	2	2	0	否	是	移植	未妊娠
900	0	C00007101	刘红苓	＜35	29	1	降调节方案	3	253.125	≤10天	8	≤3000	2025	HCG	3	0	0	原发不孕	13.7	≤24	21.3	男方因素	5	6.99	1037	1.21	4	4.56	5.21	36	1	8	8.9	B-C	IVF	0	0	0	0	0	0	0	是		无可移植胚胎
1192	0	C00008438	刘红苓	＜35	29	2	拮抗剂方案	2	253.125	≤10天	8	≤3000	2025	HCG	3	0	0	原发不孕	2.48	≤24	21.3	男方因素	4	8.75	1090	1.13	3	4.56	5.21	36	1	8	11	C	ICSI	1	0	1	0	0	0	0	否	否	全胚冷冻
928	0	2017050047	李菁菁	＜35	30	2	降调节方案	3	262.5	≤10天	8	≤3000	2100	HCG	2	2	1	继发不孕	1.72	＞24	25.3	女方因素	4	1.82	877	0.84	3	5.21	5.22	56.43	1	10	11.3	C	IVF	2	0	2	1	2	2	0	否	是	移植	已妊娠	临床妊娠	宫内妊娠	单胎宫内妊娠
1780	1	C00012345	潘健健	≥35	36	1	拮抗剂方案	2	391.667	＞10天	12	＞3000	4700	HCG	6	0	0	原发不孕	1.25	≤24	21.4	混合因素	2	9.91	582	1.78	1	9.51	5.22	39.09	2	5	12	A	ICSI	1	0	1	1	0	0	0	否	否	全胚冷冻
2265	0	2016050054	李菁菁	＜35	29	1	降调节方案	3	225	≤10天	10	≤3000	2250	HCG	2	2	1	继发不孕	2.06	＞24	25.3	女方因素	4	35.37	923	0.88	4	5.21	5.22	56.43	1	10			IVF	3	0	2	1	2	2	0	否	是	移植	已妊娠	临床妊娠	宫外妊娠	异位妊娠
91	0	2017080031	卢娜	＜35	27	1	降调节方案	3	218.75	＞10天	12	≤3000	2625	HCG	5	0	0	原发不孕	2.19	≤24	23.4	女方因素	9	5.9	2046	1.91	9	7.64	5.23	59.09	1	18	11.5	A	IVF	6	0	3	0	0	0	0	否	否	全胚冷冻
331	0	2017100171	曹德红	≥35	37	1	降调节方案	3	170.455	＞10天	11	≤3000	1875	HCG	6	1	1	继发不孕	1.89	≤24	22.6	混合因素	7	1.27	2038	0.71	8	6.89	5.25	49	2	12	15.7	A	ICSI	5	0	2	0	2	2	0	否	是	移植	未妊娠
830	0	C00005387	周云霞	≥35	42	1	拮抗剂方案	2	211.364	＞10天	11	≤3000	2325	双扳机	2	4	1	继发不孕	1.51	≤24	22.3	混合因素	5	2.89	1437	0.62	5	7.11	5.25	45	2	8	8.7	A	ICSI	4	0	2	1	2	2	0	否	是	移植	未妊娠
954	1	C00017190	郝芸	＜35	34	1	刺激方案	1	450	＞10天	11	＞3000	4950	HCG	1	0	0	原发不孕	2.61	≤24	21.5	女方因素	4	6.99	673	1.21	3	6.7	5.25	61	1	7	5.4	A	IVF	2	1	2	0	0	0	0	否	否	全胚冷冻
1179	1	C00013268	吕桂霞	≥35	38	1	拮抗剂方案	2	348.214	＞10天	14	＞3000	4875	HCG	4	3	1	继发不孕	1.62	≤24	21.3	女方因素	4	1.32	1130	1.12	8	14.87	5.25	23	2	11	10	A	IVF	5	0	2	0	2	2	0	否	是	移植	未妊娠
1824	1	C00019392	郝芸	≥35	35	2	刺激方案	1	450	＞10天	11	＞3000	4950	HCG	1	0	0	原发不孕	1.29	≤24	21.5	女方因素	2	5.16	503.17	0.74	3	6.7	5.25	61	2	7	6.1	B	IVF	0	0	0	0	0	0	0	是		无可移植胚胎
399	0	2017030308	杨晶莎	＜35	27	1	降调节方案	3	257.143	＞10天	14	＞3000	3600	HCG	1	2	0	继发不孕	2.30	＞24	32.3	女方因素	7	1.28	1344	1.16	8	8.41	5.26	42	1	15	15.2	A-B	IVF	6	0	2	1	2	2	0	否	是	移植	未妊娠
1168	0	C00008002	李焕苓	≥35	35	1	降调节方案	3	246.429	＞10天	14	＞3000	3450	HCG	5	1	1	继发不孕	1.80	≤24	22.6	女方因素	4	4.05	1194	0.53	4	8.41	5.26	42	2	7	1.69	A	IVF	2	0	2	0	0	0	0	否	否	全胚冷冻
1510	0	C00011013	李焕苓	≥35	36	2	刺激方案	1	150	≤10天	6	≤3000	900	HCG	5	1	1	继发不孕	1.89	≤24	22.6	女方因素	3	17.54	886	0.51	3	8.41	5.26	42	2	5	1.08	A	IVF	1	0	2	0	0	0	0	否	否	全胚冷冻
316	1	C00009141	田雪莲	≥35	40	1	刺激方案	1	450	≤10天	10	＞3000	4500	HCG	2	1	1	继发不孕	1.9	≤24	18.8	女方因素	7	7.09	2215	1.76	7	6.83	5.27	58.71	2	14	0.75	B	IVF	2	2	2	0	0	0	0	否	否	全胚冷冻
1002	1	C00017830	程雅萍	≥35	39	1	刺激方案	1	450	≤10天	10	＞3000	4500	HCG	10	0	0	原发不孕	2.43	＞24	28.7	男方因素	4	9.46	1269	1.39	5	9.66	5.27	39.17	2	10	0.46	A	ICSI	5	0	4	2	0	0	0	否	否	全胚冷冻
170	0	2018060191	程花	≥35	35	2	降调节方案	3	130	＞10天	20	≤3000	2600	HCG	3	3	1	继发不孕	1.64	≤24	23.1	男方因素	8	2.65	2534	1.1	9	11.62	5.28	65.69	2	18	10.2	A	ICSI	6	0	4	0	2	2	0	否	是	移植	未妊娠
535	1	2016080215	刘正香	≥35	43	1	刺激方案	1	356.25	≤10天	8	≤3000	2850	HCG		0	0	继发不孕	1.80	＞24	26.6	女方因素	6	1.5	2060	3.51	8	7.78	5.28	57.62	2	10	12	B	IVF	2	0	2	0	0	0	0	否	否	全胚冷冻
1052	0	C00012819	王小凤	≥35	38	1	拮抗剂方案	2	281.25	≤10天	8	≤3000	2250	双扳机	3	3	1	继发不孕	2.21	≤24	22.1	女方因素	4	9.53	1734	0.67	4	11.06	5.28	68	2	7	8.5	B	IVF	1	0	1	0	0	0	0	否	否	全胚冷冻
2250	1	C00014609	王华军	≥35	40	1	拮抗剂方案	2	325	≤10天	6	≤3000	1950	HCG	6	1	0	继发不孕	1.865	＞24	46	混合因素	1	7.41	435	0.93	3	5.17	5.28	64.07	2	15	7.7	A	ICSI	3	0	1	0	1	1	0	否	是	移植	未妊娠
141	1	2016070034	程艳娟	≥35	36	3	降调节方案	3	370.312	＞10天	16	＞3000	5925	HCG	8	2	0	继发不孕	1.74	≤24	20.2	女方因素	8	1	2261	2.36	9	7.85	5.3	37.66	2	12	8.2	A-B	IVF	2	0	2	0	0	0	0	否	否	全胚冷冻
542	0	C00015684	宋海洁	＜35	33	6	拮抗剂方案	2	200	≤10天	7	≤3000	1400	HCG	2	1	1	继发不孕	1.83	≤24	23.9	混合因素	6	6.93	2035	0.85	5	11.83	5.3	68	1	10	1.13	A	ICSI	2	0	2	0	1	2	0	否	是	移植	未妊娠
715	0	C00017058	姜欣	＜35	34	1	拮抗剂方案	2	250	≤10天	9	≤3000	2250	HCG	5	3	0	继发不孕	1.97	≤24	19.7	女方因素	5	1.52	1610	1.08	4	10.17	5.3	68	1	12	6.9	A	IVF	3	0	2	1	2	2	0	否	是	移植	未妊娠
1267	0	C00018087	宋海洁	＜35	33	7	拮抗剂方案	2	150	≤10天	8	≤3000	1200	HCG	2	1	1	继发不孕	2.85	≤24	23.9	混合因素	3	1.45	877.05	0.56	2	11.83	5.3	68	1	10	9.6	A	ICSI	1	0	1	1	1	1	0	否	是	移植	已妊娠	临床妊娠	宫内妊娠	单胎宫内妊娠
1778	1	C00013488	柳海华	≥35	39	1	拮抗剂方案	2	343.75	≤10天	8	≤3000	2750	HCG	3	5	1	继发不孕	1.36	≤24	22	混合因素	2	25.21	586	0.88		11.2	5.3	95.42	2	8	9.7	A		0	0	0	0	0	0	0	是		未取卵
306	1	C00010998	孟庆霞	≥35	44	2	刺激方案	1	300	≤10天	10	≤3000	3000	HCG	8	4	1	继发不孕	1.45	＞24	28	女方因素	7	3.65	2380	0.76	6	7.41	5.31	27.1	2	14	0.7	B	IVF	4	1	3	0	0	0	0	否	否	全胚冷冻
69	1	C00007104	苏方	≥35	36	3	降调节方案	3	391.667	≤10天	9	＞3000	3525	HCG	1	6	1	继发不孕	2.56	≤24	23	女方因素	9	1.41	2501	0.59	9	7.67	5.32	40	2	20	10.1	A	IVF	5	2	2	0	1	0	1	否	是	移植	未妊娠
354	0	2017080109	陶恒玉	＜35	30	1	降调节方案	3	177.273	＞10天	11	≤3000	1950	HCG	4	0	0	原发不孕	1.85	≤24	19.5	女方因素	7	3.96	1829	1.23	9	7.35	5.32	46.43	1	10	13.9	B	IVF	3	0	2	0	2	2	0	否	是	移植	已妊娠	临床妊娠	宫内妊娠	双胎宫内妊娠
950	1	2018060052	卓延飞	＜35	28	1	刺激方案	1	340	＞10天	15	＞3000	5100	HCG	1	1	0	继发不孕	1.42	≤24	18.4	女方因素	4	14.57	700	2.2	3	12.55	5.32	30.74	1	6	4.7	B	IVF	2	0	1	0	0	0	0	否	否	全胚冷冻
1490	1	C00003721	卓延飞	＜35	29	2	刺激方案	1	429.545	＞10天	11	＞3000	4725	HCG	1	1	0	继发不孕	1.42	≤24	18.4	女方因素	3	19.42	811	1.69	2	12.55	5.32	30.74	1	6	5	B	IVF	2	0	2	0	0	0	0	否	否	全胚冷冻
1521	0	C00012793	包振华	＜35	33	1	拮抗剂方案	2	286.364	＞10天	11	＞3000	3150	HCG	5	3	0	继发不孕	1.53	≤24	20.7	女方因素	3	3.77	831	0.47	4	8.87	5.32	51	1	6	7	A	IVF	3	0	3	0	2	2	0	否	是	移植	未妊娠
624	1	C00012219	叶丽杰	≥35	38	3	拮抗剂方案	2	342.857	≤10天	7	≤3000	2400	HCG	8	0	0	原发不孕	1.88	＞24	24.3	混合因素	6	4.85	1268	0.65	5	8.52	5.33	40.8	2	11	0.68	A	ICSI	5	0	4	0	0	0	0	否	否	全胚冷冻
1482	0	C00009329	叶丽杰	≥35	37	2	刺激方案	1	225	≤10天	10	≤3000	2250	HCG	8	0	0	原发不孕	2.32	＞24	24.3	混合因素	3	22.33	854.39	0.46	2	8.52	5.33	40.8	2	11	6.6	A	ICSI	1	0	1	0	0	0	0	否	否	全胚冷冻
487	0	2017010064	孟宪立	＜35	31	2	降调节方案	3	150	＞10天	11	≤3000	1650	HCG	4	0	0	原发不孕	2.0	＞24	27.2	混合因素	7	0.62	1631	0.64	8	6.65	5.34	71.12	1	14	13	A	ICSI	6	0	6	3	2	2	0	否	是	移植	已妊娠	临床妊娠	宫内妊娠	单胎宫内妊娠
576	1	2016110237	刘海燕	＜35	33	3	刺激方案	1	375	≤10天	9	＞3000	3375	HCG	4	0	0	原发不孕	1.40	＞24	29.3	女方因素	6	1.04	1684	0.91	7	6.45	5.34	51.38	1	8	12	A	IVF	0	0	0	0	0	0	0	是		未受精
761	1	2017030226	马红慧	≥35	42	1	降调节方案	3	337.5	≤10天	8	≤3000	2700	HCG	2	0	0	继发不孕	2.46	≤24	22	女方因素	5	2.9	1322	1.22	7	8.56	5.34	40	2	8	9	B	IVF	6	0	4	0	0	0	0	否	否	全胚冷冻
1317	0	2017030121	付鹏鹏	≥35	35	4	降调节方案	3	150	＞10天	12	≤3000	1800	HCG	2	2	0	继发不孕	1.25	＞24	27.1	混合因素	3	4.41	715	0.11	3	8.56	5.34	40	2	6	15.7	B	ICSI	3	0	2	0	2	2	0	否	是	移植	未妊娠
491	1	2016050229	马征	＜35	34	1	刺激方案	1	350	＞10天	15	＞3000	5250	HCG	5	0	0	原发不孕	2.47	≤24	20.9	女方因素	6	1.45	2563	0.87	8	6.2	5.35	47.7	1	9	10.8	B	IVF	0	0	0	0	0	0	0	是		未受精
673	1	2017030197	许祎	≥35	38	2	降调节方案	3	425	≤10天	9	＞3000	3825	HCG	8	0	0	原发不孕	1.51	＞24	25	女方因素	5	7.18	1875	0.64	0	10.29	5.35	29.6	2	5	10.5	A		0	0	0	0	0	0	0	是		未取到卵
976	0	2016090150	王茂云	≥35	40	2	降调节方案	3	265.385	＞10天	13	＞3000	3450	HCG	5	3	1	继发不孕	2.32	＞24	37.8	男方因素	4	1.74	1362	2.71	9	6.12	5.35	29	2	13	13.8	A	ICSI	2	0	1	0	1	1	0	否	是	移植	未妊娠
21	1	C00016908	陈学双	≥35	38	1	降调节方案	3	346.154	＞10天	13	＞3000	4500	HCG	1	3	1	继发不孕	1.92	≤24	20.9	女方因素	10	2.46	2007	1.2	8	9.62	5.36	42.7	2	13	13.2	A	IVF	5	2	2	2	0	0	0	否	否	全胚冷冻
49	0	2016060219	杜军红	＜35	31	4	降调节方案	3	242.308	＞10天	13	＞3000	3150	HCG	4	0	0	原发不孕	2.11	≤24	23.4	混合因素	9	3.89	2027	0.56	7	9.62	5.36	42.7	1	16	11	B	ICSI	3	0	1	1	0	0	0	否	否	全胚冷冻
247	1	C00006926	郑文芳	≥35	44	1	拮抗剂方案	2	366.667	≤10天	9	＞3000	3300	HCG	5	0	0	原发不孕	1.7	＞24	24.1	混合因素	7	2.42	1910	1.33	6	10.67	5.36	10	2	8	10	B	ICSI	0	0	1	0	1	1	0	否	是	移植	未妊娠
181	0	2018010189	沈云燕	≥35	36	2	降调节方案	3	268.75	＞10天	12	＞3000	3225	HCG	2	3	1	继发不孕	2.93	＞24	25.4	不明原因	8	3.68	2301	1.36	8	7.81	5.37	29.6	2	13	10	A	ICSI	3	0	1	0	0	0	0	否	否	全胚冷冻
216	0	2018060021	翟文方	＜35	32	1	降调节方案	3	285	≤10天	10	≤3000	2850	HCG	1	0	0	原发不孕	2.84	≤24	20.4	男方因素	8	0.5	1671	0.54	6	12.47	5.37	34.56	1	14	11.1	A	IVF	0	0	0	0	0	0	0	是		无可移植胚胎
509	1	2017060012	宫晓娜	≥35	40	1	拮抗剂方案	2	291.667	≤10天	9	≤3000	2625	HCG	2	3	1	继发不孕	2.05	≤24	21.1	女方因素	6	2.12	2375	0.64	7	9.09	5.37	41	2	11	12.6	A	IVF	3	0	2	2	2	2	0	否	是	移植	未妊娠
875	0	2018010120	宫晓娜	≥35	40	2	降调节方案	3	136.364	＞10天	11	≤3000	1500	HCG	2	3	1	继发不孕	1.77	≤24	21.1	混合因素	5	0.78	1172	0.89	5	9.09	5.37	41.75	2	11	11.4	A	ICSI	2	0	2	2	2	2	0	否	是	移植	未妊娠
569	0	C00010794	孙启梅	≥35	40	1	拮抗剂方案	2	159.375	≤10天	8	≤3000	1275	HCG	5	0	0	原发不孕	1.59	≤24	18	女方因素	6	1.43	1775	2.57	4	18.57	5.38	25	2	11	11	A	IVF	2	0	1	0	0	0	0	否	否	全胚冷冻
1418	1	C00017764	陆娜	＜35	31	1	降调节方案	3	342.5	≤10天	10	＞3000	3425	HCG	1	0	0	原发不孕	1.55	≤24	18.1	女方因素	3	10.64	846	1.04	4	7.73	5.38	67	1	12	11	A	IVF	4	0	2	1	2	2	0	否	是	移植	已妊娠	临床妊娠	宫内妊娠	单胚胎停
16	1	2018040159	荣英杰	≥35	40	1	降调节方案	3	300	＞10天	11	＞3000	3300	HCG	10	2	0	继发不孕	3.35	＞24	24.1	女方因素	10	2.63	2548	0.96	9	9.29	5.39	44.98	2	14	8	A	IVF	5	0	2	0	0	0	0	否	否	全胚冷冻
18	0	2018040067	张利娟	＜35	31	1	降调节方案	3	272.727	＞10天	11	≤3000	3000	HCG	6	1	1	继发不孕	2.58	≤24	22.9	不明原因	10	1.34	2184	0.42	8	8.22	5.39	77.07	1	12	13.8	A	IVF	3	0	1	0	0	0	0	否	否	全胚冷冻
162	1	2016090221	刘娜	＜35	32	2	降调节方案	3	400	＞10天	15	＞3000	6000	HCG	3	0	0	原发不孕	2.49	＞24	25.7	女方因素	8	0.59	1762	1.24	8	6.89	5.39	26.43	1	12	20.2	B	IVF	7	0	2	0	2	2	0	否	是	移植	已妊娠	临床妊娠	宫内妊娠	单胎宫内妊娠
215	1	C00004824	曲姗姗	＜35	27	2	降调节方案	3	325	＞10天	12	＞3000	3900	HCG	6	0	0	原发不孕	3.24	≤24	20.4	女方因素	8	0.57	1678	0.78	9	6.61	5.39	35.42	1	15	1.2	A-B	IVF	3	0	2	1	2	2	0	否	是	移植	已妊娠	临床妊娠	宫内妊娠	单胎宫内妊娠
508	1	2016080084	孟丛丛	＜35	29	2	刺激方案	1	420	≤10天	10	＞3000	4200	HCG	3	0	0	原发不孕	1.33	≤24	22.5	女方因素	6	1.64	2381	1.26	9	7.53	5.39	80.74	1	10	12.9	A	IVF	6	0	2	1	2	2	0	否	是	移植	已妊娠	临床妊娠	宫内妊娠	单胚胎停
608	0	C00007080	张利娟	＜35	33	2	降调节方案	3	231.818	＞10天	11	≤3000	2550	HCG	6	1	1	继发不孕	2.05	≤24	22.9	男方因素	6	1.28	1453	0.28	6	8.22	5.39	77.07	1	12	1.36	A	ICSI	4	0	2	0	2	2	0	否	是	移植	已妊娠	临床妊娠	宫内妊娠	单胎宫内妊娠
752	1	2016020096	孟丛丛	＜35	28	1	降调节方案	3	356.25	＞10天	12	＞3000	4275	HCG	3	0	0	原发不孕	1.84	≤24	22.5	女方因素	5	1.05	1375	1.55	3	7.53	5.39	80.74	1	9	12.3	A	IVF	2	0	2	0	2	2	0	否	是	移植	未妊娠
1136	1	2018040156	曲姗姗	＜35	27	1	降调节方案	3	302.778	≤10天	9	≤3000	2725	HCG	6	0	0	原发不孕	3.0	≤24	20.4	不明原因	4	0.82	1318	0.76	6	6.61	5.39	35.42	1	15	11.7	A	IVF	5	0	0	0	0	0	0	是		无可移植胚胎
1426	1	2017040004	王国娟	＜35	28	1	降调节方案	3	312.5	＞10天	12	＞3000	3750	HCG	5	1	0	继发不孕	1.78	≤24	23.7	女方因素	3	2.5	969	1.31	5	9.15	5.39	56.76	1	8	13	A	IVF	3	0	0	0	0	0	0	是		无可移植胚胎
263	1	C00008831	孙蒙	＜35	31	1	降调节方案	3	300	≤10天	10	≤3000	3000	HCG	2	0	0	原发不孕	4.02	≤24	22.8	女方因素	7	3.69	1479	1.02	7	6.3	5.4	70	1	25	10.5	A	IVF	5	0	4	0	2	2	0	否	是	移植	已妊娠	临床妊娠	宫内妊娠	单胎宫内妊娠
792	1	2018040220	张梦琳	＜35	29	1	降调节方案	3	305.769	＞10天	13	＞3000	3975	HCG	2	2	0	继发不孕	1.24	≤24	20.2	不明原因	5	9.02	1669	0.81	3	9.42	5.41	56	1	8	10.1	A	IVF	2	0	1	0	0	0	0	否	否	全胚冷冻
485	1	C00010132	邱文	≥35	41	2	刺激方案	1	300	≤10天	8	≤3000	2400	HCG	2	5	1	继发不孕	1.5	＞24	28.7	女方因素	6	5.84	1648	1.29	3	7.09	5.42	41	2	8	1.16	A-B	IVF	1	0	1	1	0	0	0	否	否	全胚冷冻
1270	1	C00017484	刘燕霞	≥35	39	2	刺激方案	1	338.158	＞10天	19	＞3000	6425	HCG	3	2	0	继发不孕	1.31	＞24	28.4	混合因素	3	16.54	869	1.4	2	9.26	5.42	28	2	9	5.2	A-B	ICSI	2	0	2	0	0	0	0	否	否	全胚冷冻
195	0	C00016199	陈凤娟	≥35	35	2	降调节方案	3	289.583	＞10天	12	＞3000	3475	HCG	4	4	2	继发不孕	3.04	≤24	21.6	女方因素	8	2.86	2022	1.4	8	8.04	5.43	38	2	12	12.8	B	IVF	3	0	2	0	2	2	0	否	是	移植	已妊娠	临床妊娠	宫内妊娠	单胎宫内妊娠
122	0	2016120068	靳倩	＜35	28	1	降调节方案	3	170.455	＞10天	11	≤3000	1875	HCG	1	0	0	原发不孕	1.78	≤24	19.5	女方因素	9	0.85	1168	0.63	9	8.14	5.44	49.09	1	19			IVF	9	0	4	0	2	2	0	否	是	移植	未妊娠
1161	0	C00007038	毕春莲	≥35	43	2	拮抗剂方案	2	225	≤10天	7	≤3000	1575	HCG	2	2	1	继发不孕	2.66	≤24	21.5	女方因素	4	1.27	1221	0.12	6	10.59	5.44	13	2	9	6.5	B	IVF	5	0	2	1	2	2	0	否	是	移植	已妊娠	临床妊娠	宫内妊娠	单胚胎停
2169	0	C00006457	毕春莲	≥35	43	1	刺激方案	1	150	≤10天	5	≤3000	750	HCG	2	2	1	继发不孕	1.68	≤24	21.5	混合因素	1	35.37	323	0.88		10.59	5.44	13	2	9	6.6	A		0	0	0	0	0	0	0	是		未取卵
2254	0	C00016592	张福光	＜35	28	1	拮抗剂方案	2	287.5	≤10天	8	≤3000	2300	HCG	2	1	0	继发不孕	2.7	≤24	17.3	女方因素	3	2.51	1070	1.31	4	10.35	5.44	80	1	10	15.4	A-B	IVF	4	0	3	0	1	1	0	否	是	移植	未妊娠
105	1	C00010403	张翠玉	＜35	33	4	刺激方案	1	520.588	＞10天	17	＞3000	8850	双扳机	5	1	1	继发不孕	1.33	＞24	29.3	男方因素	9	2.01	1870	2.11	2	9.73	5.45	42	1	14	15.5	B	ICSI	2	0	2	0	0	0	0	否	否	全胚冷冻
206	1	C00005097	张翠玉	＜35	33	3	降调节方案	3	422.727	＞10天	11	＞3000	4650	HCG	1	0	0	原发不孕	2.9	＞24	29.3	男方因素	8	0.44	1846	0.9	7	9.73	5.45	42	1	14	19	A-B	ICSI	3	0	1	0	0	0	0	否	否	全胚冷冻
585	0	2016110128	朱小雯	≥35	35	1	降调节方案	3	280.357	＞10天	14	＞3000	3925	HCG	4	3	1	继发不孕	1.89	＞24	31.2	女方因素	6	1.51	1597	0.65	7	9.73	5.45	42	2	10	11.7	B	IVF	7	0	4	3	2	2	0	否	是	移植	已妊娠	临床妊娠	宫内妊娠	双胎宫内妊娠
901	1	2017040219	李靖	＜35	26	1	刺激方案	1	351.923	＞10天	13	＞3000	4575	HCG	3	1	0	继发不孕	1.54	≤24	22.9	女方因素	5	0.49	1035	0.88	3	6.03	5.45	15	1	7	7.2	A	IVF	2	0	2	0	0	0	0	否	否	全胚冷冻
1683	0	C00016370	刘燕霞	≥35	39	1	拮抗剂方案	2	286.364	＞10天	11	＞3000	3150	HCG	3	2	0	继发不孕	1.31	＞24	28.4	女方因素	2	2.08	788	0.63	2	9.73	5.45	42	2	9	10	A	IVF	1	0	1	0	0	0	0	否	否	全胚冷冻
416	0	2017050137	王素梅	≥35	37	1	降调节方案	3	179.545	＞10天	11	≤3000	1975	HCG	9	0	0	原发不孕	2.25	≤24	23.9	女方因素	7	1.21	1151	0.59	5	6.79	5.46	84.41	2	8	11.5	A	IVF	2	0	2	0	2	2	0	否	是	移植	已妊娠	临床妊娠	宫内妊娠	单胎宫内妊娠
764	1	C00016716	王素梅	≥35	41	2	刺激方案	1	300	≤10天	8	≤3000	2400	HCG	3	1	1	继发不孕	1.31	≤24	23.9	女方因素	5	7.85	1838	0.82	4	6.79	5.46	84.41	2	8	0.55	A	IVF	3	0	4	1	0	0	0	否	否	全胚冷冻
881	1	2018030016	谭啸	≥35	39	2	降调节方案	3	327.273	＞10天	11	＞3000	3600	HCG	7	1	1	继发不孕	1.51	≤24	23.9	不明原因	5	1.52	1148	1.33	6	4.99	5.46	51	2	9	10.9	A	IVF	3	1	3	1	2	2	0	否	是	移植	已妊娠	临床妊娠	宫内妊娠	单胚胎停
1447	1	2016080236	赵佳	≥35	35	2	降调节方案	3	328.125	≤10天	8	≤3000	2625	HCG	9	2	0	继发不孕	1.55	＞24	24.3	男方因素	3	5.34	907	0.38	4	7.06	5.46	80.74	2	8	11	B	ICSI	4	0	2	1	0	0	0	否	否	全胚冷冻
1544	1	C00007191	徐婷婷	＜35	32	1	拮抗剂方案	2	358.333	≤10天	9	＞3000	3225	HCG	3	0	0	原发不孕	1.57	≤24	21.5	不明原因	3	1.04	1170	0.69	5	6.33	5.46	38	1	11	13.3	A	IVF	3	0	2	0	1	1	0	否	是	移植	未妊娠
575	1	2017010011	李海霞	≥35	41	1	刺激方案	1	375	＞10天	11	＞3000	4125	HCG	3	2	2	继发不孕	1.71	＞24	33.3	女方因素	6	2.24	1698	0.75	4	11.48	5.47	36.43	2	9	12.4	A	IVF	4	0	1	0	1	1	0	否	是	移植	未妊娠
1391	1	2016060011	赵芷卉	＜35	29	1	降调节方案	3	375	＞10天	11	＞3000	4125	HCG	2	0	0	原发不孕	2.72	≤24	23.4	混合因素	3	5.5	904	0.49	7	6.1	5.49	40.6	1	14	8.1	A	ICSI	4	0	2	0	2	2	0	否	是	移植	未妊娠
2195	0	2016110230	赵芷卉	＜35	29	2	降调节方案	3	250.862	＞10天	29	＞3000	7275	HCG	2	0	0	原发不孕	2.04	≤24	23.4	混合因素	1	1.29	270	0.43	5	6.1	5.49	40.6	1	14	7.5	A	ICSI	4	0	2	0	0	0	0	否	否	全胚冷冻
284	1	C00012117	杨秋香	≥35	38	1	降调节方案	3	313.636	＞10天	11	＞3000	3450	HCG	5	2	1	继发不孕	3.23	≤24	22.7	女方因素	7	2.61	2037	0.98	8	6.56	5.5	40.37	2	12	0.6	B	IVF	4	0	3	0	2	2	0	否	是	移植	已妊娠	临床妊娠	宫内妊娠	单胎宫内妊娠
855	0	C00018785	赵金凤	≥35	39	1	拮抗剂方案	2	225	≤10天	8	≤3000	1800	HCG	4	2	1	继发不孕	2.47	≤24	21.7	女方因素	5	2	1286.31	0.43	7	12.39	5.51	27.21	2	9	11.9	A-B	IVF	6	1	1	0	1	0	1	否	是	移植	未妊娠
243	0	2017110001	刘晓凤	＜35	26	3	刺激方案	1	225	≤10天	9	≤3000	2025	HCG	1	1	0	继发不孕	1.82	＞24	39	混合因素	7	11.64	1973	1.75	7	6.47	5.52	17	1	10	3.9	A	ICSI	5	0	4	2	0	0	0	否	否	全胚冷冻
408	0	C00003660	郑雯泽	≥35	36	1	拮抗剂方案	2	150	≤10天	8	≤3000	1200	HCG	3	4	1	继发不孕	4.63	≤24	20	女方因素	7	2.77	1264	0.47	8	8.23	5.52	26.9	2	14	10.2	A	IVF	2	0	2	1	2	2	0	否	是	移植	已妊娠	临床妊娠	宫内妊娠	双胎宫内妊娠
685	1	2018070014	刘晓凤	＜35	27	4	刺激方案	1	330	≤10天	10	＞3000	3300	HCG	1	1	0	继发不孕	1.390	＞24	39	男方因素	5	2.1	1790	1.22	4	6.47	5.52	17	1	10	7.1	A	ICSI	2	0	2	2	0	0	0	否	否	全胚冷冻
696	1	2016060259	韩金轩	≥35	40	3	刺激方案	1	490.909	＞10天	11	＞3000	5400	HCG	4	2	0	原发不孕	1.92	≤24	20.2	男方因素	5	9.27	1733	1.46	7	12.25	5.52	45.67	2	8	8.2	B	ICSI	5	0	2	1	0	0	0	否	否	全胚冷冻
1326	1	2016040288	刘晓凤	＜35	25	2	刺激方案	1	395.455	＞10天	11	＞3000	4350	HCG	1	1	0	继发不孕	1.74	＞24	39	混合因素	3	0.92	671	2.23	4	6.47	5.52	17	1	10	8	A-B	ICSI	3	0	2	1	0	0	0	否	否	全胚冷冻
1416	1	2016050065	韩金轩	≥35	40	2	降调节方案	3	358.929	＞10天	14	＞3000	5025	HCG	4	2	0	原发不孕	1.7	≤24	20.2	男方因素	3	4.23	852	0.84	2	12.25	5.52	45.67	2	8	13.3	A	ICSI	0	0	1	0	0	0	0	否	否	全胚冷冻
232	0	2018060111	董娜娜	＜35	30	1	降调节方案	3	135	≤10天	10	≤3000	1350	HCG	2	2	0	继发不孕	1.58	＞24	26	女方因素	8	1.23	1329	0.89	7	8.61	5.53	35.42	1	15	10.3	B	IVF	5	0	4	1	2	2	0	否	是	移植	未妊娠
852	1	C00009637	吕军迎	≥35	41	2	刺激方案	1	425	≤10天	7	≤3000	2975	HCG	6	3	1	继发不孕	2.18	≤24	19.5	男方因素	5	15.53	1294	1.69	4	11.68	5.53	23.56	2	12	0.71	A	ICSI	1	0	0	0	0	0	0	是		无可移植胚胎
1102	1	C00010688	田杰	≥35	36	1	拮抗剂方案	2	293.75	＞10天	12	＞3000	3525	HCG	2	1	0	继发不孕	1.3	≤24	19.9	女方因素	4	8.95	1436	1.53	3	13.09	5.53	78	2	6	0.96	A	IVF	2	0	1	0	1	1	0	否	是	移植	未妊娠
897	0	2017040076	王慧	＜35	29	1	降调节方案	3	150	≤10天	10	≤3000	1500	HCG	5	0	0	原发不孕	2.13	≤24	21.1	女方因素	5	2.63	1051	0.58	7	8.15	5.55	43.77	1	15	10.5	A	IVF	6	0	2	0	0	0	0	否	否	全胚冷冻
242	1	2017110094	杨景淑	＜35	32	1	降调节方案	3	490.909	＞10天	11	＞3000	5400	HCG	5	0	0	原发不孕	2.5	＞24	29.3	不明原因	8	1.18	1184	0.58	9	7.91	5.56	20.37	1	14			IVF	4	0	4	1	2	2	0	否	是	移植	已妊娠	临床妊娠	宫内妊娠	双胎宫内妊娠
588	1	C00018899	高丽娜	≥35	39	1	拮抗剂方案	2	450	≤10天	9	＞3000	4050	HCG	13	1	0	继发不孕	2.88	≤24	21.8	女方因素	6	0.69	1593.79	1.41	4	7.08	5.56	39.3	2	10	11.8	B	IVF	3	0	2	0	0	0	0	否	否	全胚冷冻
1463	1	C00017209	王静	≥35	36	1	刺激方案	1	300	≤10天	9	≤3000	2700	HCG	1	3	1	继发不孕	1.96	≤24	22.8	女方因素	3	1.66	958	0.66	4	9	5.56	57.96	2	9	5.1	A	IVF	2	0	2	2	0	0	0	否	否	全胚冷冻
1602	1	2018040223	张玉清	≥35	36	2	刺激方案	1	325	≤10天	6	≤3000	1950	HCG	3	1	1	继发不孕	1.93	≤24	20	男方因素	3	8.14	956	1.2	3	7.91	5.56	40.37	2	7			ICSI	3	0	1	1	0	0	0	否	否	全胚冷冻
1135	1	C00017499	魏媛媛	≥35	35	1	刺激方案	1	300	＞10天	15	＞3000	4500	HCG	1	1	0	继发不孕	2.92	≤24	22.2	女方因素	4	22.58	1330	2.04	3	9.02	5.58	58	2	7	6.3	B	IVF	1	0	0	0	0	0	0	是		无可移植胚胎
333	1	2017080193	岳园园	＜35	29	2	刺激方案	1	300	＞10天	11	＞3000	3300	HCG	3	0	0	原发不孕	1.52	＞24	30	男方因素	7	2.83	2018	1.27	8	5.87	5.59	19.6	1	12	12.1	B	ICSI	7	0	4	2	2	2	0	否	是	移植	未妊娠
456	1	2016060061	孔焕丽	＜35	28	1	降调节方案	3	335	＞10天	15	＞3000	5025	HCG	2	0	0	原发不孕	2.9	＞24	25.9	女方因素	6	0.17	1724	0.69	4	8.11	5.59	58.72	1	13	11	B	IVF	1	0	2	0	2	2	0	否	是	移植	已妊娠	临床妊娠	宫内妊娠	双胎宫内妊娠
1000	0	2017060306	陈莉	≥35	41	1	拮抗剂方案	2	216.667	≤10天	9	≤3000	1950	HCG	6	3	0	继发不孕	1.64	≤24	23.4	女方因素	4	3.44	1275	0.86	3	9.26	5.59	43	2	9	9.6	A	IVF	2	0	2	1	0	0	0	否	否	全胚冷冻
1131	1	C00017260	崔玉芹	≥35	42	2	拮抗剂方案	2	300	＞10天	13	＞3000	3900	HCG	3	1	0	继发不孕	1.5	≤24	22.6	女方因素	4	3.46	1343	0.61	4	11.15	5.59	25	2	10	12.2	A	IVF	4	0	3	2	2	2	0	否	是	移植	未妊娠
82	0	2017040036	李澍	≥35	35	3	刺激方案	1	183.333	≤10天	9	≤3000	1650	HCG	2	1	1	继发不孕	2.59	≤24	19.8	女方因素	9	8.78	2232	0.59	8	7.65	5.6	53.77	2	16	6.4	A	IVF	7	0	0	0	0	0	0	是		无可移植胚胎
788	0	2017120149	李云芳	＜35	29	1	降调节方案	3	238.636	＞10天	11	≤3000	2625	HCG	1	0	0	原发不孕	2.4	≤24	21.5	女方因素	5	0.3	1687	1.86	4	9.82	5.6	35	1	12	9.4	A	IVF	2	0	2	2	2	2	0	否	是	移植	已妊娠	临床妊娠	宫内妊娠	双胎宫内妊娠
1542	0	2017110165	辛欣	＜35	26	1	刺激方案	1	225	＞10天	11	≤3000	2475	HCG	2	0	0	原发不孕	1.26	≤24	19.5	女方因素	3	20.14	1171	1.49	2	8.58	5.6	80.6	1	8	6.3	A	IVF	2	0	1	0	0	0	0	否	否	全胚冷冻
2	0	2017060026	丛婷婷	＜35	29	1	降调节方案	3	225	≤10天	9	≤3000	2025	HCG	6	0	0	继发不孕	2.89	＞24	26.6	女方因素	10	0.83	2737	0.48	5	9.95	5.61	39	1	12	10.3		IVF	4	0	4	0	2	2	0	否	是	移植	已妊娠	临床妊娠	宫内妊娠	单胚胎停
266	1	2018020081	牛光会	＜35	34	1	降调节方案	3	309.091	＞10天	11	＞3000	3400	HCG	1	3	0	继发不孕	2.53	＞24	26.4	女方因素	7	4.63	2411	1.69	8	6.53	5.61	69.73	1	10	9.6	A	IVF	5	0	4	1	2	2	0	否	是	移植	未妊娠
768	1	C00010356	高琳琳	≥35	36	4	刺激方案	1	330	≤10天	10	＞3000	3300	HCG	4	0	0	原发不孕	1.94	≤24	23.2	女方因素	5	15.33	1813	1.78	3	16.59	5.61	20	2	7	0.75	A-B	IVF	0	0	1	0	0	0	0	否	否	全胚冷冻
1500	1	C00017297	王斐	＜35	34	1	降调节方案	3	337.5	＞10天	14	＞3000	4725	HCG	1	1	0	继发不孕	3.21	＞24	25.1	女方因素	3	1.25	957	2.07	4	10.11	5.61	48	1	10	16	B-C	IVF	1	1	2	0	0	0	0	否	否	全胚冷冻
177	0	2017090237	高盼盼	＜35	28	3	降调节方案	3	204.545	＞10天	11	≤3000	2250	HCG	3	0	0	原发不孕	4.10	≤24	20.3	混合因素	8	1.24	2365	0.86	9	7.28	5.62	30.6	1	14	12.8	A	ICSI	3	0	2	1	2	2	0	否	是	移植	未妊娠
534	0	2018030197	吴盈盈	＜35	34	1	降调节方案	3	216.667	＞10天	12	≤3000	2600	HCG	1	3	1	继发不孕	2.31	＞24	27.8	女方因素	6	3.15	2064	2.81	7	5.23	5.62	38	1	10	8	A-B	IVF	5	0	2	0	0	0	0	否	否	全胚冷冻
163	1	2017050036	刘梅	＜35	31	1	刺激方案	1	300	≤10天	10	≤3000	3000	HCG	2	1	1	继发不孕	1.96	＞24	27.3	女方因素	8	7.11	2706	0.77	5	8.34	5.63	66.43	1	9	9.4	B	IVF	3	0	2	0	0	0	0	否	否	全胚冷冻
662	1	2018030294	朱庆花	≥35	36	2	刺激方案	1	291.667	≤10天	9	≤3000	2625	HCG	6	1	1	继发不孕	3.97	＞24	26.8	不明原因	5	0.74	1426	0.73	6	8.69	5.63	53.77	2	11	8.5	B-C	IVF	5	0	2	0	0	0	0	否	否	全胚冷冻
1882	0	2016040162	贾玉芬	≥35	37	1	降调节方案	3	178.846	＞10天	13	≤3000	2325	HCG	1	4	1	继发不孕	2.427	＞24	26.2	女方因素	2	0.77	253	0.33	0	5.77	5.63	86.43	2	16	10.8	A-B		0	0	0	0	0	0	0	是		未取到卵
1448	0	2016120077	杨翠	≥35	39	1	刺激方案	1	150	≤10天	7	≤3000	1050	HCG	2	3	1	继发不孕	1.39	≤24	22.8	女方因素	3	9.48	905	0.62	3	8.6	5.64	59.09	2	8	6.3	B-C	IVF	2	0	2	1	0	0	0	否	否	全胚冷冻
555	0	2016120139	甄兰兰	＜35	32	1	降调节方案	3	156.818	＞10天	11	≤3000	1725	HCG	4	0	0	原发不孕	1.20	≤24	19.4	女方因素	6	1.48	1865	0.81	3	6.89	5.65	86.43	1	12	10.2	A	IVF	3	0	3	0	2	2	0	否	是	移植	已妊娠	临床妊娠	宫内妊娠	单胎宫内妊娠
1152	1	2017030077	郑荣景	≥35	37	1	刺激方案	1	341.667	≤10天	9	＞3000	3075	HCG	1	3	1	继发不孕	1.603	＞24	31.3	女方因素	4	5.77	1247	0.56	4	9.02	5.65	40	2	7	11.6	A	IVF	3	0	2	1	2	2	0	否	是	移植	未妊娠
1224	1	C00004984	狄冉	≥35	42	4	拮抗剂方案	2	431.25	≤10天	8	＞3000	3450	双扳机	2	3	1	继发不孕	1.91	＞24	26	男方因素	3	2.36	981	0.96	5	13.02	5.65	40	2	11			ICSI	3	0	1	0	0	0	0	否	否	全胚冷冻
1308	0	2018070131	狄冉	≥35	42	3	拮抗剂方案	2	185.294	＞10天	17	＞3000	3150	HCG	2	3	1	继发不孕	1.48	＞24	26	男方因素	3	4.41	741	0.15	3	13.02	5.65	40	2	11	9.9	B	ICSI	2	0	0	0	0	0	0	是		无可移植胚胎
1371	1	2018050027	狄冉	≥35	41	2	降调节方案	3	432.143	＞10天	14	＞3000	6050	HCG	1	3	1	继发不孕	1.9	＞24	26	女方因素	3	0.59	486	0.42	2	13.02	5.65	40	2	11	9.7	B-C	IVF	1	0	0	0	0	0	0	是		无可移植胚胎
199	0	C00012973	谭菁菁	≥35	37	1	降调节方案	3	283.333	＞10天	12	＞3000	3400	HCG	4	0	0	原发不孕	1.83	≤24	23.6	女方因素	8	1.18	1959	0.75	9	8.69	5.66	52.4	2	13	12.6	A-B	IVF	7	0	2	0	0	0	0	否	否	全胚冷冻
553	1	C00012537	杨淑萍	≥35	41	1	刺激方案	1	300	≤10天	8	≤3000	2400	HCG	3	1	1	继发不孕	1.66	＞24	26.2	女方因素	6	4.4	1879	0.84	5	8.55	5.66	87.4	2	11	1.06	B	IVF	1	0	2	0	2	2	0	否	是	移植	未妊娠
678	0	2017100057	刘晓芳	≥35	35	1	刺激方案	1	150	≤10天	9	≤3000	1350	HCG	7	0	0	原发不孕	2.48	≤24	21.6	男方因素	5	13.31	1821	1.27	5	8.99	5.67	32.15	2	9	7.1	B	ICSI	3	0	2	1	0	0	0	否	否	全胚冷冻
1210	0	2016100095	陶园	＜35	33	2	降调节方案	3	267.857	≤10天	7	≤3000	1875	HCG	2	1	0	继发不孕	2.32	≤24	19.2	女方因素	4	21.49	1060	2.36	7	7.85	5.67	65.42	1	7	10.4	A	IVF	0	0	0	0	2	2	0	否	是	移植	未妊娠
1993	1	2017010109	陶园	＜35	33	3	降调节方案	3	372.5	≤10天	10	＞3000	3725	HCG	2	1	0	继发不孕	2.01	≤24	19.2	女方因素	2	10.83	502	0.85	2	7.85	5.67	23	1	7	9.4	A	IVF	2	0	2	0	2	2	0	否	是	移植	已妊娠	临床妊娠	宫内妊娠	单胎宫内妊娠
223	1	2018030204	郭欣	≥35	37	1	降调节方案	3	305.769	＞10天	13	＞3000	3975	HCG	1	3	0	继发不孕	3.070	≤24	16.5	不明原因	8	0.82	1572	0.81	4	16.55	5.68	53	2	8	14.6	A	IVF	4	0	4	1	0	0	0	否	否	全胚冷冻
286	0	2017070262	肖芳	≥35	44	1	降调节方案	3	262.5	≤10天	8	≤3000	2100	HCG	2	4	1	继发不孕	3.53	≤24	21.5	混合因素	7	8.17	2025	1.32	7	7.9	5.69	46.43	2	14	8.5	A	ICSI	6	0	4	3	2	2	0	否	是	移植	未妊娠
680	1	2017090233	刘晓杰	＜35	27	1	降调节方案	3	403.846	＞10天	13	＞3000	5250	HCG	3	2	0	继发不孕	3.15	＞24	27.3	女方因素	5	1	1600	0.53	7	7.4	5.69	28	1	11	9.3	A	IVF	6	0	6	0	2	2	0	否	是	移植	已妊娠	临床妊娠	宫内妊娠	双胎宫内妊娠
951	1	C00018016	郝亚飞	≥35	38	2	刺激方案	1	300	＞10天	12	＞3000	3600	HCG	3	2	2	继发不孕	1.7	≤24	19.5	混合因素	4	18.94	687.06	0.58	0	15.02	5.69	33	2	7	5.5	B-C		0	0	0	0	0	0	0	是		未取到卵
1124	0	2016030225	柳风连	＜35	29	1	降调节方案	3	267.857	＞10天	14	＞3000	3750	HCG	3	3	0	继发不孕	1.86	≤24	22	女方因素	4	1.68	1362	1.15	5	7.43	5.69	11	1	8	13.5	B	IVF	3	0	2	0	2	2	0	否	是	移植	已妊娠	临床妊娠	宫内妊娠	单胎宫内妊娠
323	1	C00016340	宋小雪	≥35	38	1	降调节方案	3	300	＞10天	11	＞3000	3300	HCG	2	1	0	继发不孕	4.55	≤24	23.4	女方因素	7	1.81	2137	0.88	8	8.79	5.7	31	2	12	13.7	A	IVF	6	0	3	0	2	2	0	否	是	移植	已妊娠	临床妊娠	宫内妊娠	单胎宫内妊娠
389	1	2016100019	贾琳瑶	＜35	29	1	降调节方案	3	310	＞10天	15	＞3000	4650	HCG	1	0	0	原发不孕	2.52	≤24	22.5	女方因素	7	1.14	1492	1.44	9	8.18	5.7	82.55	1	12	14.7	A	IVF	7	0	4	0	2	2	0	否	是	移植	已妊娠	临床妊娠	宫内妊娠	单胎宫内妊娠
880	0	2017020177	郑金凤	≥35	38	1	降调节方案	3	158.333	≤10天	9	≤3000	1425	HCG	1	3	1	继发不孕	4.12	＞24	25.7	女方因素	9	1.91	1914	0.76	9	6.09	5.7	35	2	14	13.9	A	IVF	7	0	7	5	2	2	0	否	是	移植	已妊娠	临床妊娠	宫内妊娠	双胎宫内妊娠
887	0	C00003645	魏倩倩	＜35	32	2	降调节方案	3	275	＞10天	12	＞3000	3300	HCG	3	1	1	继发不孕	2.17	≤24	19.1	男方因素	5	2.08	1097	1.22	4	8.84	5.71	30.1	1	12	14	A	ICSI	0	0	0	0	0	0	0	是		无可移植胚胎
359	1	C00008942	于雪萍	≥35	38	2	降调节方案	3	407.143	＞10天	14	＞3000	5700	HCG	2	0	0	原发不孕	2.26	≤24	17.6	女方因素	9	1.72	1858	1.06	8	8.99	5.72	38.58	2	14	1.34	A	IVF	6	0	6	1	2	2	0	否	是	移植	已妊娠	临床妊娠	宫内妊娠	单胎宫内妊娠
984	1	C00010475	程莉	≥35	36	1	拮抗剂方案	2	325	＞10天	12	＞3000	3900	HCG	4	1	1	继发不孕	2.05	≤24	19.6	女方因素	4	5.46	1339	1.38	3	6.7	5.72	37	2	8	1.37	A	IVF	2	0	0	0	0	0	0	是		无可移植胚胎
2223	0	C00017768	吴海丽	≥35	35	1	降调节方案	3	275	≤10天	9	≤3000	2475	HCG	1	2	2	继发不孕	1.4	＞24	28.3	混合因素	1	0.28	192.91	0.31	1	10.33	5.73	46.35	2	7	9.4	C	ICSI	1	0	1	0	1	1	0	否	是	移植	未妊娠
107	0	2016020049	吴雪	＜35	34	1	降调节方案	3	281.25	＞10天	12	＞3000	3375	HCG	3	0	0	原发不孕	3.92	≤24	19.4	女方因素	9	0.35	1868	0.47	7	9.58	5.74	46.43	1	12	16.2	A	IVF	4	0	1	0	0	0	0	否	否	全胚冷冻
1430	0	2017040217	王凤娟	＜35	33	1	刺激方案	1	225	＞10天	11	≤3000	2475	HCG	4	0	0	继发不孕	1.22	＞24	25.2	女方因素	3	3	959	0.95	2	7.13	5.74	93	1	8	12	A	IVF	1	0	1	0	1	1	0	否	是	移植	未妊娠
1950	0	C00004955	张欣彦	≥35	36	1	降调节方案	3	225.735	＞10天	17	＞3000	3837.5	HCG	2	2	1	继发不孕	1.2	≤24	22.1	女方因素	2	0.3	506	0.8	3	11.82	5.74	82	2	8	11.9	B	IVF	3	1	2	0	0	0	0	否	否	全胚冷冻
2066	1	2018060077	李敬菊	≥35	41	1	刺激方案	1	300	≤10天	5	≤3000	1500	HCG	1	2	1	继发不孕	1.26	＞24	25.6	女方因素	1	11.57	573	0.54	2	14.53	5.74	74.34	2	6	8.8	B	IVF	1	0	1	0	0	0	0	否	否	全胚冷冻
2078	0	2017110291	王凤娟	＜35	33	2	刺激方案	1	181.25	＞10天	12	≤3000	2175	HCG	4	1	0	继发不孕	1.4	＞24	25.2	女方因素	1	3.59	525	0.72	1	7.13	5.74	93	1	8	11.7	A	IVF	1	0	1	0	0	0	0	否	否	全胚冷冻
513	0	C00010217	李永文	＜35	32	1	拮抗剂方案	2	216.667	≤10天	9	≤3000	1950	HCG	2	1	0	继发不孕	3.85	≤24	19.6	女方因素	6	4.33	2316	0.79	7	8.4	5.75	49	1	12	11.3	A-B	IVF	3	1	3	0	2	2	0	否	是	移植	未妊娠
584	0	2017040013	李霄丽	＜35	26	1	降调节方案	3	253.125	≤10天	8	≤3000	2025	HCG	2	0	0	原发不孕	1.84	≤24	24	不明原因	6	9.42	1610	0.98	4	6.1	5.76	33.03	1	9	15.7	A	IVF	1	0	0	0	0	0	0	是		无可移植胚胎
659	1	C00011460	王凤霞	≥35	35	2	刺激方案	1	300	≤10天	10	≤3000	3000	HCG	6	0	0	原发不孕	1.36	≤24	21	女方因素	5	16.91	1001	3.4	1	13.21	5.76	29	2	6	0.6	A-B	IVF	1	0	1	1	0	0	0	否	否	全胚冷冻
709	1	C00015900	王凤霞	≥35	36	4	刺激方案	1	300	≤10天	8	≤3000	2400	HCG	7	0	0	原发不孕	1.26	≤24	21	女方因素	5	23.59	1645	0.93	4	13.21	5.76	29	2	6	0.48	A-B	IVF	2	0	2	0	0	0	0	否	否	全胚冷冻
258	0	2018060146	解洪杰	＜35	31	1	刺激方案	1	115	≤10天	10	≤3000	1150	HCG	4	0	0	原发不孕	3.65	≤24	21.5	女方因素	7	3.78	2628	1.25	8	5.33	5.77	36.8	1	16	11.7	A	IVF	6	0	4	0	2	2	0	否	是	移植	已妊娠	临床妊娠	宫内妊娠	单胎宫内妊娠
461	1	2018030223	翟新菊	≥35	38	2	降调节方案	3	465	＞10天	15	＞3000	6975	HCG	2	3	1	继发不孕	1.77	≤24	22.3	男方因素	6	1.09	1650	0.49	6	7.36	5.77	46.43	2	12	13.8	A	ICSI	5	0	1	0	1	1	0	否	是	移植	未妊娠
784	0	2016110015	邢宏雷	＜35	28	1	降调节方案	3	215	≤10天	10	≤3000	2150	HCG	2	2	0	继发不孕	2.58	≤24	22	混合因素	5	0.6	1733	1.47	6	7.91	5.77	34.76	1	10	9.6	B	ICSI	5	0	4	0	0	0	0	否	否	全胚冷冻
205	1	C00003591	孙晓玲	≥35	40	1	降调节方案	3	293.182	＞10天	11	＞3000	3225	HCG	1	2	1	继发不孕	1.59	≤24	21.6	女方因素	8	0.97	1863	1.17	9	6.68	5.78	16	2	13	10.8	A-B	IVF	5	0	2	0	2	2	0	否	是	移植	已妊娠	临床妊娠	宫内妊娠	单胚胎停
287	0	2017070258	刘芳	＜35	30	1	降调节方案	3	290	＞10天	15	＞3000	4350	HCG	2	0	0	原发不孕	3.66	≤24	22.7	女方因素	7	4.05	2020	1.49	5	13.61	5.78	86.43	1	17	18.5	A-B	IVF	2	0	0	0	0	0	0	是		无可移植胚胎
455	0	C00008994	宗红	＜35	34	1	刺激方案	1	225	≤10天	7	≤3000	1575	HCG	5	1	1	继发不孕	2.68	≤24	23.1	女方因素	6	9.13	1746	1.27	6	8.04	5.78	34.78	1	9	0.57	B	IVF	3	0	2	0	0	0	0	否	否	全胚冷冻
744	0	2017070248	赵万方	≥35	37	1	降调节方案	3	234.375	≤10天	8	≤3000	1875	HCG	1	8	1	继发不孕	2.42	≤24	22.2	女方因素	5	5.61	1426.56	0.7	4	7.21	5.78	25.42	2	9	9	A	IVF	3	0	2	0	0	0	0	否	否	全胚冷冻
861	0	C00016079	郝娟	＜35	33	1	拮抗剂方案	2	266.667	≤10天	9	≤3000	2400	HCG	4	1	1	继发不孕	3.06	≤24	21.5	男方因素	5	5.28	1254	0.54	5	13.62	5.78	36	1	12	10.6	A-B	IVF	5	0	4	2	1	1	0	否	是	移植	未妊娠
1094	1	C00005251	张茹	＜35	31	1	拮抗剂方案	2	387.5	≤10天	6	≤3000	2325	HCG	1	0	0	原发不孕	1.64	≤24	20.7	女方因素	4	8.37	1463	1.38	4	14.8	5.78	82	1	9	11.6	A	IVF	2	1	3	1	2	2	0	否	是	移植	已妊娠	临床妊娠	宫内妊娠	单胎宫内妊娠
1766	1	2018010134	赵万方	≥35	38	2	拮抗剂方案	2	300	≤10天	6	≤3000	1800	HCG	2	8	1	继发不孕	1.3	≤24	22.2	男方因素	2	2.26	606	0.39	2	7.21	5.78	55.42	2	9			ICSI	2	0	1	0	0	0	0	否	否	全胚冷冻
391	0	2017070079	鲁云霞	＜35	34	1	降调节方案	3	218.75	＞10天	12	≤3000	2625	HCG	6	0	0	原发不孕	1.33	＞24	26	混合因素	7	0.48	1419	0.42	7	9.36	5.79	59.09	1	15	17.7	A	ICSI	7	0	2	0	0	0	0	否	否	全胚冷冻
629	1	2018030116	鲁云霞	≥35	35	2	刺激方案	1	300	≤10天	10	≤3000	3000	HCG	6	0	0	原发不孕	1.89	＞24	26	男方因素	6	10.44	1105	1.6	7	9.36	5.79	49.09	2	15	7.2	B	ICSI	1	0	0	0	0	0	0	是		无可移植胚胎
906	1	2018070097	丁杨杨	＜35	33	2	降调节方案	3	346.154	＞10天	13	＞3000	4500	HCG	5	2	1	继发不孕	1.75	≤24	22	女方因素	4	3.26	976	0.52	6	7.77	5.8	57	1	10	12.4	A-B	IVF	4	0	2	0	0	0	0	否	否	全胚冷冻
1301	1	2017030065	张小明	≥35	40	1	降调节方案	3	393.75	＞10天	16	＞3000	6300	HCG	3	1	1	继发不孕	1.32	＞24	26	女方因素	3	1.02	773	0.74	6	6.19	5.8	52	2	8	12.4	A	IVF	3	0	0	0	0	0	0	是		无可移植胚胎
1128	0	C00010800	孔娟	≥35	38	3	拮抗剂方案	2	150	≤10天	10	≤3000	1500	HCG	1	2	0	继发不孕	1.73	≤24	22	女方因素	4	4.43	1350	0.62	4	8.49	5.81	36.43	2	8	10.4	A	IVF	3	0	2	2	0	0	0	否	否	全胚冷冻
1464	0	C00009634	孔娟	≥35	38	2	拮抗剂方案	2	150	≤10天	9	≤3000	1350	HCG	1	2	0	继发不孕	1.73	≤24	22	女方因素	3	3.37	958	1.47	3	8.49	5.81	36.43	2	8	9.8	A	IVF	0	1	1	0	0	0	0	否	否	全胚冷冻
9	0	C00012101	郭艳皊	＜35	24	1	刺激方案	1	105	＞10天	15	≤3000	1575	HCG	2	0	0	原发不孕	2.93	≤24	24	女方因素	10	6.79	2897	0.29	8	6.71	5.83	46.43	1	12	8	A-B	IVF	2	0	1	0	0	0	0	否	否	全胚冷冻
226	0	C00019096	张景博	≥35	36	2	拮抗剂方案	2	272.5	≤10天	10	≤3000	2725	HCG	3	0	0	原发不孕	1.69	≤24	19.2	女方因素	8	0.73	1530.8.	0.58	7	12.25	5.83	34.07	2	11	12.5	A	IVF	5	0	4	3	0	0	0	否	否	全胚冷冻
638	1	2016030282	孙丽朋	＜35	34	5	降调节方案	3	354.545	＞10天	11	＞3000	3900	HCG	5	1	1	原发不孕	1.48	≤24	23.5	男方因素	6	2.47	1184	0.75	7	9.51	5.83	69.73	1	12	8.7	B	ICSI	5	0	4	4	0	0	0	否	否	全胚冷冻
1586	1	2018030302	韩芬芬	＜35	28	2	拮抗剂方案	2	344.444	＞10天	18	＞3000	6200	HCG	2	0	0	原发不孕	1.3	≤24	22.1	混合因素	3	2.04	1036	1.15	2	8.49	5.84	22.54	1	8	18.9	C	ICSI	1	0	0	0	0	0	0	是		无可移植胚胎
1026	1	C00016009	高娟	≥35	38	1	降调节方案	3	337.5	＞10天	12	＞3000	4050	HCG	7	0	0	原发不孕	1.41	≤24	21.9	女方因素	4	1.36	1159	0.93	3	11.17	5.85	32	2	10	12	B	IVF	0	0	1	0	1	1	0	否	是	移植	未妊娠
40	0	2017100151	程爽	≥35	41	1	降调节方案	3	211.364	＞10天	11	≤3000	2325	HCG	1	2	1	继发不孕	2.21	≤24	20.8	女方因素	9	1.73	2304	0.86	9	5.5	5.86	31.75	2	15	11.3	A	IVF	6	0	4	3	0	0	0	否	否	全胚冷冻
68	0	C00009520	陈紫	≥35	39	1	拮抗剂方案	2	172.5	＞10天	11	≤3000	1897.5	HCG	4	0	0	原发不孕	3.49	≤24	22.3	混合因素	9	2.82	2522	0.75	8	6.29	5.86	25	2	20	7.6	B	ICSI	5	0	3	0	0	0	0	否	否	全胚冷冻
110	1	C00017049	申燕燕	＜35	32	1	拮抗剂方案	2	304.545	＞10天	11	＞3000	3350	HCG	2	3	1	继发不孕	2.77	≤24	20.2	女方因素	6	0.67	1775	1.4	8	6.86	5.86	41	1	13	14.5	A	IVF	8	1	5	2	2	2	0	否	是	移植	未妊娠
468	1	2017010013	张伟丽	≥35	39	2	降调节方案	3	300	≤10天	8	≤3000	2400	HCG	3	1	1	继发不孕	2.08	≤24	24	混合因素	6	11.02	1835	1.5	6	6.86	5.86	41	2	10	9.1	B	ICSI	2	0	2	0	0	0	0	否	否	全胚冷冻
545	0	2016020094	马晓燕	＜35	24	1	降调节方案	3	200	＞10天	13	≤3000	2600	HCG	1	0	0	原发不孕	3.07	≤24	22.3	女方因素	6	4.92	1998	1.14	6	9.9	5.86	44	1	16	19.3	A	IVF	4	0	2	0	0	0	0	否	否	全胚冷冻
824	1	C00017413	王娟	≥35	41	1	拮抗剂方案	2	315	＞10天	15	＞3000	4725	双扳机	5	4	2	继发不孕	1.23	≤24	20.7	女方因素	5	4.14	1469	2.35	3	9.9	5.86	44	2	7	8.7	A	IVF	0	0	0	0	0	0	0	是		无可移植胚胎
992	1	2017030255	郭英霞	≥35	41	2	降调节方案	3	321.429	＞10天	14	＞3000	4500	HCG	1	2	1	继发不孕	1.46	＞24	30.8	女方因素	4	1.15	1308	0.47	4	7.75	5.86	16	2	8	9	A	IVF	2	0	1	1	1	1	0	否	是	移植	未妊娠
1170	1	C00008542	秦红艳	≥35	38	2	拮抗剂方案	2	317.5	≤10天	10	＞3000	3175	HCG	4	0	0	原发不孕	1.43	≤24	23.6	女方因素	4	2.92	1185	0.62	3	6.86	5.86	41	2	11	13.9	B	IVF	2	0	2	0	2	2	0	否	是	移植	未妊娠
1569	1	C00006730	秦红艳	≥35	38	1	拮抗剂方案	2	375	≤10天	9	＞3000	3375	HCG	4	0	0	原发不孕	1.73	≤24	23.6	女方因素	3	10.73	1082	0.89	4	6.86	5.86	41	2	11	17	B	IVF	4	0	0	0	0	0	0	是		无可移植胚胎
278	0	2016070176	杨娜	＜35	26	1	拮抗剂方案	2	166.667	≤10天	9	≤3000	1500	HCG	3	0	0	原发不孕	1.840	≤24	22	女方因素	7	2.29	2120	2.1	7	5.34	5.87	57	1	18	11.7	B	IVF	4	0	4	1	0	0	0	否	否	全胚冷冻
1126	1	2017030260	刘丽娟	＜35	34	2	降调节方案	3	381.818	＞10天	11	＞3000	4200	HCG	1	1	0	原发不孕	1.58	≤24	23.9	女方因素	4	0.78	1360	0.66	3	8.87	5.88	40	1	8	13	A	IVF	2	0	2	1	2	2	0	否	是	移植	已妊娠	临床妊娠	宫外妊娠	异位妊娠
1777	0	2018030237	郑秋玲	≥35	37	1	刺激方案	1	150	≤10天	8	≤3000	1200	HCG	8	3	1	继发不孕	2.46	＞24	26.7	女方因素	2	4.6	590	1.04	3	14.8	5.88	53	2	7	10	A	IVF	1	0	1	0	1	1	0	否	是	移植	未妊娠
1806	0	C00004469	郑秋玲	≥35	37	2	刺激方案	1	150	＞10天	11	≤3000	1650	HCG	8	3	1	继发不孕	1.51	＞24	26.7	女方因素	2	17.2	532	2.09		14.8	5.88	23	2	7	12.8	A-B		0	0	0	0	0	0	0	是		未取卵
43	1	C00006644	时均霞	≥35	44	3	降调节方案	3	311.538	＞10天	13	＞3000	4050	HCG	3	2	1	继发不孕	1.29	＞24	25.8	混合因素	9	1.12	2187	0.78	7	11.56	5.89	33.77	2	12	1.05	A	ICSI	3	0	2	0	2	2	0	否	是	移植	未妊娠
350	0	2016090169	李莹	≥35	40	1	降调节方案	3	262.5	＞10天	12	＞3000	3150	HCG	6	0	0	原发不孕	1.47	＞24	26.3	女方因素	7	2.18	1854	0.51	7	9.44	5.89	80.74	2	11	12	A-B	IVF	5	0	4	3	2	2	0	否	是	移植	已妊娠	临床妊娠	宫内妊娠	单胎宫内妊娠
351	0	2016050070	赵佳	≥35	35	1	降调节方案	3	285.577	＞10天	13	＞3000	3712.5	HCG	8	2	0	继发不孕	1.34	＞24	24.3	女方因素	7	2.72	1852	0.76	6	7.06	5.89	80.74	2	8	13	A-B	IVF	1	0	1	0	0	0	0	否	否	全胚冷冻
55	1	2016030303	王淑珍	≥35	43	2	刺激方案	1	325	≤10天	9	≤3000	2925	HCG	1	8	1	继发不孕	2.71	≤24	20.3	混合因素	9	2.18	2839	1.22	8	9.78	5.9	63.36	2	11	6.5	B	ICSI	4	0	2	1	0	0	0	否	否	全胚冷冻
248	1	2016070156	郑香华	≥35	48	1	刺激方案	1	356.25	＞10天	12	＞3000	4275	HCG	13	2	1	继发不孕	1.24	＞24	25.7	混合因素	7	6.87	1864	0.42	5	10.67	5.9	59.09	2	6	12.5	A	ICSI	3	0	2	1	2	2	0	否	是	移植	已妊娠	临床妊娠	宫内妊娠	单胎宫内妊娠
713	1	C00010122	李永艳	≥35	39	1	拮抗剂方案	2	375	≤10天	7	≤3000	2625	HCG	6	0	0	继发不孕	1.92	＞24	27.6	男方因素	5	5.56	1622	1.16	8	7.39	5.9	28	2	15	9.2	A	IVF	4	0	2	1	2	2	0	否	是	移植	未妊娠
1096	1	C00015652	解玉萍	＜35	29	1	拮抗剂方案	2	313.889	≤10天	9	≤3000	2825	HCG	5	0	0	原发不孕	2.60	＞24	27.6	女方因素	4	2.07	1456	1.41	5	7.53	5.91	45	1	10	18.8	A	IVF	3	0	2	0	0	0	0	否	否	全胚冷冻
338	1	2016020118	姚玉芳	＜35	34	1	降调节方案	3	294.643	＞10天	14	＞3000	4125	HCG	5	0	0	原发不孕	1.80	＞24	31.2	女方因素	7	1.46	1971	1.58	8	7.78	5.92	44.67	1	14	9.6	B	IVF	6	0	2	0	2	2	0	否	是	移植	未妊娠
1046	1	C00016380	王立赛	＜35	31	1	降调节方案	3	397.5	≤10天	10	＞3000	3975	HCG	1	0	0	原发不孕	1.54	≤24	23.8	混合因素	4	4.29	1769	1.13	4	10.56	5.92	41.61	1	8	12.2	A	ICSI	1	1	2	0	1	1	0	否	是	移植	未妊娠
1089	0	2017030165	牛玉	≥35	37	1	降调节方案	3	288.462	＞10天	13	＞3000	3750	HCG	1	2	1	继发不孕	2.44	≤24	23.6	女方因素	4	2.29	1488	0.56	3	8.56	5.92	41.61	2	9	12.5	B	IVF	1	0	0	0	0	0	0	是		无可移植胚胎
128	0	2017070089	王瑞雪	＜35	30	3	降调节方案	3	150	≤10天	10	≤3000	1500	HCG	2	0	0	继发不孕	23.10	≤24	21.4	男方因素	8	0.45	1927	0.51	4	6.82	5.93	31	1	14	10.8	A	ICSI	4	0	2	0	2	2	0	否	是	移植	未妊娠
189	0	C00012259	鞠潇慧	＜35	31	1	拮抗剂方案	2	246.429	≤10天	7	≤3000	1725	HCG	3	0	0	原发不孕	3.55	≤24	20.1	女方因素	8	3.38	2131	0.98	6	5.2	5.93	36.43	1	13	9.6	A	IVF	3	2	4	1	2	2	0	否	是	移植	已妊娠	临床妊娠	宫内妊娠	双胎宫内妊娠
514	1	C00008726	仪美娟	≥35	38	3	降调节方案	3	351.923	＞10天	13	＞3000	4575	HCG	3	3	1	继发不孕	2.79	＞24	24.2	混合因素	6	1.46	2300	0.27	8	6.19	5.93	40	2	12	12.2	B-C	ICSI	5	0	4	2	2	2	0	否	是	移植	已妊娠	临床妊娠	宫内妊娠	双胎宫内妊娠
581	0	2018030132	田敏	≥35	36	2	拮抗剂方案	2	225	≤10天	10	≤3000	2250	HCG	5	1	1	继发不孕	1.28	≤24	20.8	不明原因	6	3.73	1631	1.3	4	6.19	5.93	40	2	9	10.3	A	ICSI	4	0	2	1	1	1	0	否	是	移植	未妊娠
971	1	C00015792	潘来恩	＜35	29	2	刺激方案	1	300	＞10天	12	＞3000	3600	HCG	2	0	0	原发不孕	1.43	＞24	25.6	女方因素	4	9.76	1386	1.49	3	4.75	5.93	76.43	1	9	7.5	A	IVF	2	0	1	0	0	0	0	否	否	全胚冷冻
972	0	C00013208	潘来恩	＜35	28	1	刺激方案	1	225	≤10天	8	≤3000	1800	HCG	2	0	0	原发不孕	2.47	＞24	25.6	女方因素	4	2.14	1386	0.52	3	4.75	5.93	86.43	1	9	7.4	A-B	IVF	1	0	2	0	2	2	0	否	是	移植	未妊娠
1874	0	2018030093	季洪芹	≥35	35	2	刺激方案	1	150	≤10天	7	≤3000	1050	HCG	6	2	1	继发不孕	2.54	＞24	27.1	女方因素	2	7.82	338	0.47	2	9.7	5.95	44.67	2	13	4.9	B	IVF	1	0	1	0	0	0	0	否	否	全胚冷冻
1298	1	2018040201	杨红霞	≥35	40	1	拮抗剂方案	2	350	＞10天	12	＞3000	4200	HCG	4	1	0	继发不孕	1.5	＞24	26.3	男方因素	3	6.79	781	2.11	3	16.27	5.96	54.91	2	6	13.7	A	ICSI	1	0	0	0	0	0	0	是		无可移植胚胎
558	1	2016060237	高巍	≥35	36	2	降调节方案	3	427.5	≤10天	10	＞3000	4275	HCG	1	0	0	原发不孕	2.59	≤24	20.4	不明原因	6	0.8	1848	1.17	6	3.03	5.97	46.43	2	16	6.8	B	ICSI	5	0	4	1	0	0	0	否	否	全胚冷冻
1920	0	C00017669	谭焕娟	≥35	39	1	拮抗剂方案	2	275	≤10天	9	≤3000	2475	HCG	1	1	0	继发不孕	1.26	≤24	19.3	女方因素	2	5.84	480	1.28	4	12.64	5.97	84	2	8	11.7	A	IVF	4	0	1	0	0	0	0	否	否	全胚冷冻
22	0	2016030017	田晓琼	＜35	32	1	降调节方案	3	240	＞10天	15	＞3000	3600	HCG	10	0	0	原发不孕	1.98	≤24	20.3	女方因素	10	0.88	1839	3.6	9	7.53	5.98	80.74	1	11	12.8	A	IVF	4	0	2	1	0	0	0	否	否	全胚冷冻
288	1	2016100185	张桂芳	≥35	39	1	刺激方案	1	300	≤10天	7	≤3000	2100	HCG	2	7	1	继发不孕	1.61	≤24	17.4	女方因素	7	1.92	1872	1.72	7	7.7	5.98	35.42	2	10	8.5	A	IVF	0	0	0	0	0	0	0	是		无可移植胚胎
489	0	2018060158	亓万芸	≥35	36	1	降调节方案	3	216.176	＞10天	17	＞3000	3675	HCG	1	5	1	继发不孕	1.99	＞24	25	不明原因	6	1.41	2578	1.38	6	7.49	5.98	77.07	2	15	7.4	A	IVF	4	0	0	0	0	0	0	是		无可移植胚胎
1864	1	C00017935	邓秀芝	≥35	42	3	刺激方案	1	300	≤10天	6	≤3000	1800	HCG	1	3	1	继发不孕	1.37	≤24	21.5	女方因素	2	12.56	366	2.53	4	4.63	5.98	46.43	2	9	0.72	B	IVF	2	0	1	0	0	0	0	否	否	全胚冷冻
20	1	C00004604	焉兆玥	＜35	30	2	降调节方案	3	300	＞10天	12	＞3000	3600	HCG	3	1	0	继发不孕	2.35	≤24	23.3	女方因素	10	1.12	2132	1.18	5	7.36	5.99	33.77	1	12	1.46	A	IVF	2	2	3	0	0	0	0	否	否	全胚冷冻
415	0	C00003524	尹彦梅	＜35	32	1	降调节方案	3	277.5	≤10天	10	≤3000	2775	HCG	1	3	0	继发不孕	2.43	＞24	24.7	女方因素	7	1.22	1163	1.14	6	4.43	5.99	48	1	14	1.77	B	IVF	6	0	3	3	0	0	0	否	否	全胚冷冻
767	1	2016030279	尹焕平	≥35	38	4	降调节方案	3	300	≤10天	6	≤3000	1800	HCG	3	1	1	继发不孕	2.18	≤24	19.2	女方因素	5	3.89	1817	0.34	7	8.74	5.99	34.76	2	12	10.6	A	IVF	6	0	2	0	2	2	0	否	是	移植	未妊娠
1022	0	C00006271	任丽云	≥35	40	1	刺激方案	1	225	≤10天	8	≤3000	1800	双扳机	3	1	0	继发不孕	1.7	≤24	19.9	女方因素	4	3.77	1185	0.52	6	8.17	5.99	81	2	10	0.72	B	IVF	3	0	4	1	0	0	0	否	否	全胚冷冻
1230	1	C00015632	王小燕	≥35	38	2	刺激方案	1	300	≤10天	7	≤3000	2100	HCG	4	3	1	继发不孕	2.28	≤24	18.4	女方因素	3	1.97	969	1.08	2	11.33	6	65	2	8	0.55	A-B	IVF	1	0	1	1	0	0	0	否	否	全胚冷冻
437	0	C00016241	张华	≥35	37	3	拮抗剂方案	2	200	≤10天	7	≤3000	1400	HCG	8	0	0	原发不孕	1.6	≤24	20	混合因素	6	10.89	736	0.76	5	9.41	6.01	89	2	11			ICSI	2	0	2	0	2	2	0	否	是	移植	未妊娠
649	0	2016040111	魏玉姣	＜35	25	1	降调节方案	3	263.393	＞10天	14	＞3000	3687.5	HCG	3	1	0	继发不孕	3.94	＞24	26.7	女方因素	5	1.24	839	1.21	3	6.56	6.01	38.65	1	11	13.5	B	IVF	2	0	1	0	1	1	0	否	是	移植	未妊娠
484	1	C00016099	李丹	＜35	33	1	降调节方案	3	337.5	＞10天	14	＞3000	4725	HCG	3	0	0	原发不孕	1.69	≤24	19.5	女方因素	6	0.52	1650	1.51	4	8.67	6.02	43.78	1	11	12.8	A	IVF	4	1	3	1	0	0	0	否	否	全胚冷冻
1432	0	C00015840	李秀梅	≥35	40	3	拮抗剂方案	2	257.143	≤10天	7	≤3000	1800	HCG	5	2	1	继发不孕	1.51	＞24	24.8	混合因素	3	1.96	946	0.9	3	14.86	6.02	62	2	8	5.3	A	ICSI	3	0	2	0	0	0	0	否	否	全胚冷冻
496	1	C00010819	宁存霞	≥35	45	2	刺激方案	1	450	＞10天	11	＞3000	4950	HCG	7	3	1	继发不孕	1.33	＞24	28.8	女方因素	6	3.85	2511	1.09	6	16.85	6.03	10	2	12	0.51	A-B	IVF	4	0	1	0	0	0	0	否	否	全胚冷冻
116	0	2017030089	翟爽	＜35	32	2	降调节方案	3	150	＞10天	11	≤3000	1650	HCG	3	0	0	原发不孕	1.7	≤24	23.8	混合因素	9	1.37	1550	0.8	6	5.66	6.04	29.86	1	18	14	A	ICSI	3	0	1	0	1	1	0	否	是	移植	已妊娠	临床妊娠	宫内妊娠	单胚胎停
939	1	C00005290	王金燕	≥35	43	2	拮抗剂方案	2	375	≤10天	10	＞3000	3750	HCG	6	1	0	继发不孕	1.68	≤24	22.7	混合因素	8	1.4	1794	3.47	7	10.99	6.04	102	2	11	1	A	ICSI	7	0	7	5	0	0	0	否	否	全胚冷冻
1409	1	C00016349	董福香	≥35	37	1	降调节方案	3	367.308	＞10天	13	＞3000	4775	HCG	5	3	1	继发不孕	3.03	＞24	24.6	女方因素	3	1.57	866.61	1.26	4	7.47	6.04	56.76	2	8	10.3	A-B	IVF	1	0	1	1	0	0	0	否	否	全胚冷冻
152	1	C00008463	刘明雪	≥35	40	2	降调节方案	3	294.643	＞10天	14	＞3000	4125	HCG	5	3	1	继发不孕	2.37	＞24	26.7	女方因素	8	1.48	1935	0.69	9	14.08	6.07	31	2	10	8.9	A	IVF	6	0	2	0	2	2	0	否	是	移植	已妊娠	临床妊娠	宫内妊娠	单胚胎停
169	1	C00018274	张俊丽	＜35	33	2	刺激方案	1	300	≤10天	7	≤3000	2100	HCG	2	3	2	继发不孕	1.79	≤24	23.4	女方因素	8	2.89	2538.44	0.68	7	7.88	6.07	29.41	1	14	10.3	A	IVF	5	0	4	0	0	0	0	否	否	全胚冷冻
1684	1	C00008796	武睿燕	≥35	36	1	刺激方案	1	330	≤10天	10	＞3000	3300	HCG	4	0	0	原发不孕	2.16	≤24	18.4	女方因素	2	23.95	788	1.22	3	7.18	6.08	43.54	2	9	5.5	A	IVF	1	0	0	0	0	0	0	是		无可移植胚胎
203	0	2017010065	周静	≥35	37	1	降调节方案	3	200	≤10天	9	≤3000	1800	HCG	1	1	1	继发不孕	2.79	≤24	22.3	女方因素	8	3.06	1877	1.63	7	7.57	6.09	44	2	12	18	A	IVF	5	0	2	1	2	2	0	否	是	移植	未妊娠
2105	1	2018070121	孟晓卉	≥35	36	1	降调节方案	3	339.583	＞10天	12	＞3000	4075	HCG	2	1	1	继发不孕	1.67	≤24	18.4	女方因素	1	0.81	458	0.68	2	10.2	6.09	45.27	2	7	7.4	A	IVF	2	0	2	1	1	1	0	否	是	移植	未妊娠
1924	0	2016050131	刘桂华	≥35	37	1	降调节方案	3	281.25	＞10天	12	＞3000	3375	HCG	4	1	1	继发不孕	2.3	≤24	19.5	不明原因	2	1.03	469	0.95	3	7.48	6.1	25.42	2	8	8	A	IVF	2	0	0	0	0	0	0	是		无可移植胚胎
431	1	C00018588	王占香	≥35	42	2	拮抗剂方案	2	300	≤10天	9	≤3000	2700	HCG	2	4	2	继发不孕	1.3	＞24	24.9	女方因素	6	5.72	891.3	0.68	5	10.52	6.12	63	2	8	11.2	A	IVF	4	0	4	2	2	2	0	否	是	移植	未妊娠
1100	0	2018050051	张莹莹	＜35	28	2	刺激方案	1	231.25	＞10天	12	≤3000	2775	HCG	2	0	0	原发不孕	2.1	≤24	20.8	女方因素	4	0.99	1446	0.42	0	14.38	6.12	40	1	9	12.6	A		0	0	0	0	0	0	0	是		未取到卵
1285	1	2017030250	王慧	≥35	40	1	刺激方案	1	334.615	＞10天	13	＞3000	4350	HCG	7	3	1	继发不孕	1.41	＞24	30.1	女方因素	3	6.34	819	0.59	2	7.38	6.12	40	2	9	16	A-B	IVF	1	0	0	0	0	0	0	是		无可移植胚胎
1835	1	C00012198	王瑞	＜35	29	2	拮抗剂方案	2	354.167	≤10天	9	＞3000	3187.5	HCG	3	0	0	原发不孕	1.24	＞24	28	女方因素	2	9.12	477	1.1	1	14.38	6.12	40	1	6	1.13	B	IVF	0	0	0	0	0	0	0	是		未受精
1967	0	C00017427	王占香	≥35	42	1	刺激方案	1	272.727	＞10天	11	≤3000	3000	HCG	2	4	2	继发不孕	1.48	＞24	24.9	女方因素	2	13.15	468	0.95	2	10.52	6.12	63	2	8	6	B	IVF	1	0	0	0	0	0	0	是		无可移植胚胎
559	1	C00017488	王颖	≥35	42	1	拮抗剂方案	2	317.5	≤10天	10	＞3000	3175	HCG	3	1	1	原发不孕	1.69	≤24	20.3	女方因素	6	1.35	1846.72	1.64	6	9.05	6.13	43	2	9	9.7	A-B	IVF	4	0	2	0	2	2	0	否	是	移植	未妊娠
1028	1	C00004090	蔡云珠	＜35	34	1	刺激方案	1	429.545	＞10天	11	＞3000	4725	双扳机	2	2	1	继发不孕	2.5	＞24	30.5	女方因素	4	4.06	1149	0.42	5	7.95	6.16	75.13	1	15	8.3	B	IVF	3	0	1	0	0	0	0	否	否	全胚冷冻
989	0	2018060092	陈卫丽	≥35	40	1	降调节方案	3	285	≤10天	10	≤3000	2850	HCG	3	7	2	继发不孕	2.85	≤24	20.7	女方因素	4	1.34	1317	2.72	6	7.2	6.17	53.77	2	9	11.1	A-B	IVF	3	0	2	0	0	0	0	否	否	全胚冷冻
238	0	C00011455	翟继丽	≥35	39	1	拮抗剂方案	2	258.333	≤10天	9	≤3000	2325	HCG	2	3	0	继发不孕	2.2	＞24	24.6	女方因素	8	3.36	1098	0.55	7	8.62	6.19	32	2	12	0.9	A	IVF	4	1	3	1	2	2	0	否	是	移植	未妊娠
1	0	2017030012	张花	＜35	25	2	降调节方案	3	141.667	＞10天	18	≤3000	2550	HCG	4	0	0	原发不孕	5.23	＞24	35.1	女方因素	10	1.17	582	0.26	4	3.32	6.21	50.5	1	55	9.3	A-B	IVF	1	0	1	1	1	1	0	否	是	移植	已妊娠	临床妊娠	宫内妊娠	单胎宫内妊娠
400	0	2018020092	刘莉	＜35	27	1	降调节方案	3	150	≤10天	10	≤3000	1500	HCG	1	2	0	继发不孕	2.49	≤24	20.3	女方因素	8	1.31	1934	0.56	9	6.56	6.22	33.77	1	16	12.3	A	IVF	8	0	6	2	0	0	0	否	否	全胚冷冻
433	1	C00013436	刘俊敬	≥35	40	1	降调节方案	3	425	＞10天	12	＞3000	5100	HCG	3	1	1	继发不孕	3.89	＞24	26	女方因素	6	1.12	862	1.96	6	9.78	6.22	40.37	2	15	13.5	B	IVF	6	0	4	1	2	2	0	否	是	移植	已妊娠	临床妊娠	宫内妊娠	单胎宫内妊娠
476	1	2017060074	韩伟伟	＜35	34	1	降调节方案	3	325	＞10天	12	＞3000	3900	HCG	4	2	0	继发不孕	2.36	＞24	31.9	女方因素	8	2.34	1241	1.23	9	5.78	6.22	40.37	1	18	16.6	A	IVF	8	0	6	0	0	0	0	否	否	全胚冷冻
623	1	2018030119	宫晓丽	＜35	28	1	降调节方案	3	322.917	＞10天	12	＞3000	3875	HCG	3	1	0	继发不孕	3.79	≤24	21.8	女方因素	6	1.58	2040	1.4	9	6.78	6.22	40.37	1	11	11.5	B-C	IVF	8	0	6	4	2	2	0	否	是	移植	未妊娠
780	1	2018020050	刘丽娟	≥35	35	3	降调节方案	3	462.5	＞10天	12	＞3000	5550	HCG	1	1	0	继发不孕	2.64	≤24	23.9	女方因素	5	1.18	1755	0.34	4	5.78	6.22	40.37	2	8	12.4	A	IVF	4	0	2	0	2	2	0	否	是	移植	未妊娠
1493	1	2016100059	孙姣姣	＜35	29	2	降调节方案	3	322.5	≤10天	10	＞3000	3225	HCG	6	0	0	原发不孕	1.42	≤24	21.4	男方因素	3	1.75	798	2.47	3	5.78	6.22	40.37	1	12	12	A	ICSI	1	0	1	1	1	1	0	否	是	移植	未妊娠
1762	1	C00004116	槐琳琳	＜35	31	2	降调节方案	3	450	＞10天	11	＞3000	4950	HCG	5	0	0	原发不孕	1.47	≤24	19.6	男方因素	2	0.44	608	0.59	2	5.78	6.22	65.37	1	7	12.3	A	ICSI	2	0	1	0	1	1	0	否	是	移植	未妊娠
1003	1	2018010082	于莉	＜35	29	1	拮抗剂方案	2	296.429	≤10天	7	≤3000	2075	HCG	2	0	0	原发不孕	2.35	≤24	19.6	男方因素	4	2.46	1269	1.56	5	7.71	6.23	41.75	1	8	12.5	A	ICSI	2	0	2	0	0	0	0	否	否	全胚冷冻
1379	0	2018010016	李庆荣	＜35	34	1	刺激方案	1	234.375	≤10天	8	≤3000	1875	HCG	2	0	0	原发不孕	2.24	≤24	23	女方因素	3	17.31	386	1.35	2	8.48	6.23	59.09	1	6	4.4	A	IVF	2	0	2	0	0	0	0	否	否	全胚冷冻
377	1	2018030056	马林林	＜35	26	1	刺激方案	1	315	≤10天	10	＞3000	3150	HCG	3	0	0	原发不孕	2.24	≤24	23.4	女方因素	7	17.66	1600	2.64	5	9.09	6.24	83.77	1	10	9.7	A	IVF	0	0	0	0	0	0	0	是		未受精
869	1	C00015183	贾慧	≥35	37	2	降调节方案	3	393.75	≤10天	8	＞3000	3150	HCG	2	1	0	继发不孕	2.76	≤24	21.7	女方因素	5	1.64	1194	1.15	8	11.71	6.24	12.5	2	10	11.5	A	IVF	3	0	2	0	2	2	0	否	是	移植	未妊娠
870	0	C00012037	贾慧	≥35	36	1	降调节方案	3	246.429	＞10天	14	＞3000	3450	HCG	2	1	0	继发不孕	1.91	≤24	21.7	女方因素	5	1.71	1194	0.76	7	11.71	6.24	12.5	2	12	13.9	A	IVF	4	0	2	0	0	0	0	否	否	全胚冷冻
1761	1	C00016624	贾慧	≥35	37	3	降调节方案	3	350	≤10天	9	＞3000	3150	HCG	2	1	0	继发不孕	2.020	≤24	21.7	女方因素	2	2.78	609	1.27	3	11.71	6.24	12.5	2	5	9.4	A	IVF	2	0	2	1	2	2	0	否	是	移植	已妊娠	临床妊娠	宫内妊娠	双胎宫内妊娠
120	1	C00017289	周静	≥35	35	1	降调节方案	3	300	＞10天	11	＞3000	3300	HCG	1	1	0	继发不孕	1.7	≤24	23	女方因素	6	3.9	1620	1.56	8	6.62	6.27	41.94	2	10	8.1	A	IVF	7	1	5	2	2	2	0	否	是	移植	未妊娠
171	0	C00014145	马召民	≥35	44	1	拮抗剂方案	2	286.364	＞10天	11	＞3000	3150	HCG	3	3	2	继发不孕	2.30	≤24	21.1	混合因素	8	2.72	2484	1.23	7	6.62	6.27	41.94	2	16	12.6	A	ICSI	2	0	2	0	2	2	0	否	是	移植	已妊娠	临床妊娠	宫内妊娠	单胎宫内妊娠
445	1	C00005698	杜文慧	＜35	29	2	降调节方案	3	431.25	＞10天	12	＞3000	5175	HCG	6	0	0	原发不孕	1.77	＞24	25.4	女方因素	6	1.04	1835	0.68	7	5.28	6.28	32.81	1	18	12.1	A	IVF	4	0	2	0	2	2	0	否	是	移植	已妊娠	临床妊娠	宫内妊娠	单胎宫内妊娠
734	0	2017120025	田禹娴	＜35	31	1	降调节方案	3	237.5	≤10天	10	≤3000	2375	HCG	5	1	1	继发不孕	3.49	≤24	20.2	不明原因	5	2.35	1478	0.89	6	8.21	6.28	38	1	17	14.8	A-B	IVF	2	0	2	0	2	2	0	否	是	移植	已妊娠	临床妊娠	宫内妊娠	单胎宫内妊娠
727	1	C00013128	张艳华	≥35	43	1	刺激方案	1	309.375	≤10天	8	≤3000	2475	HCG	1	2	1	继发不孕	1.21	≤24	23.4	女方因素	5	2.35	1538	0.37	5	9.51	6.3	70.1	2	11	1.25		IVF	4	0	3	0	2	2	0	否	是	移植	未妊娠
739	0	2017100087	冯鑫安	＜35	34	1	降调节方案	3	225	＞10天	11	≤3000	2475	HCG	2	0	0	原发不孕	1.42	≤24	19	女方因素	5	2.05	1452	0.67	4	8.53	6.3	45.42	1	12	10.5	A	IVF	1	0	2	1	1	1	0	否	是	移植	未妊娠
1005	1	C00016093	张艳华	≥35	44	2	刺激方案	1	300	＞10天	11	＞3000	3300	HCG	1	2	1	继发不孕	1.54	≤24	23.4	女方因素	4	10.46	1246	0.6	6	9.51	6.3	70.1	2	11	0.63		IVF	6	0	4	1	0	0	0	否	否	全胚冷冻
1059	0	2016020022	杨一林	＜35	30	1	降调节方案	3	165	≤10天	10	≤3000	1650	HCG	1	0	0	原发不孕	1.78	≤24	23.3	男方因素	4	2.63	1670	0.52	3	7.53	6.31	84.78	1	36	12.5	A	IVF	3	0	3	1	2	2	0	否	是	移植	未妊娠
1836	1	C00006332	张月莲	≥35	39	2	降调节方案	3	335.526	＞10天	19	＞3000	6375	HCG	9	4	0	继发不孕	1.55	＞24	33.5	女方因素	2	0.55	473	0.42	0	5.3	6.31	32	2	12	13.3	A		0	0	0	0	0	0	0	是		未取到卵
149	0	2016090047	史明燕	＜35	28	1	降调节方案	3	150	＞10天	11	≤3000	1650	HCG	1	2	0	继发不孕	2.28	≤24	19.8	女方因素	8	1.23	2005	0.76	9	11.21	6.32	58.72	1	15	11.4	A	IVF	8	0	4	0	2	2	0	否	是	移植	已妊娠	临床妊娠	宫内妊娠	单胎宫内妊娠
173	0	2017120191	马艳玲	＜35	33	1	降调节方案	3	258.333	＞10天	12	＞3000	3100	HCG	6	2	0	继发不孕	1.65	＞24	24.1	女方因素	8	1.12	2400	1.11	8	7.96	6.33	83.77	1	22	11.7	A-B	IVF	8	0	4	1	2	2	0	否	是	移植	已妊娠	临床妊娠	宫内妊娠	单胎宫内妊娠
796	1	C00019044	辛迪	＜35	33	1	刺激方案	1	450	＞10天	11	＞3000	4950	HCG	2	0	0	原发不孕	2.71	≤24	21	女方因素	5	10.71	1646.47	1.7	5	9.98	6.34	12.43	1	11	12.3	C	IVF	3	0	3	1	0	0	0	否	否	全胚冷冻
1050	0	2017090052	高守燕	≥35	39	1	刺激方案	1	272.727	＞10天	11	≤3000	3000	HCG	8	2	1	继发不孕	1.41	＞24	25	女方因素	4	6.66	1738	0.61	3	9.36	6.34	42	2	7	10.6	B	IVF	2	0	1	1	0	0	0	否	否	全胚冷冻
523	0	2018070126	郭盼	＜35	33	1	降调节方案	3	243.75	＞10天	12	≤3000	2925	HCG	5	1	1	继发不孕	3.06	＞24	25.4	不明原因	7	2.34	2763	0.37	7	8.76	6.35	39.09	1	20	10.4	A-B	IVF	6	0	6	2	0	0	0	否	否	全胚冷冻
757	1	C00009058	胥小翠	≥35	35	3	刺激方案	1	375	≤10天	10	＞3000	3750	HCG	4	2	1	继发不孕	2.69	＞24	25	混合因素	5	19.26	1359	1.17	4	8.81	6.35	54	2	10	0.57	A-B	ICSI	2	0	1	0	0	0	0	否	否	全胚冷冻
843	0	C00004829	胥小翠	＜35	34	1	降调节方案	3	258.824	＞10天	17	＞3000	4400	HCG	4	2	1	继发不孕	1.40	＞24	25	女方因素	5	1.79	1363	0.17	6	8.81	6.35	54	1	11	12	B-C	IVF	1	0	0	0	0	0	0	是		无可移植胚胎
87	0	C00010683	杜卿	＜35	34	1	降调节方案	3	165	＞10天	15	≤3000	2475	HCG	5	0	0	原发不孕	1.88	≤24	23.7	女方因素	9	0.81	2120	0.95	8	7.2	6.37	34	1	24	7	A	IVF	5	0	2	0	0	0	0	否	否	全胚冷冻
289	1	C00007511	赵平丽	＜35	34	1	降调节方案	3	330	＞10天	15	＞3000	4950	HCG	3	1	0	继发不孕	4.23	＞24	25.4	女方因素	7	6.67	1868	2.63	5	11	6.37	21	1	9	1.01	A	IVF	4	0	2	0	0	0	0	否	否	全胚冷冻
336	1	C00016198	马文文	≥35	35	1	降调节方案	3	300	＞10天	12	＞3000	3600	HCG	1	1	1	继发不孕	1.71	≤24	22.5	女方因素	7	0.37	1983	0.56	8	8.09	6.37	33	2	14	13.8	A	IVF	7	0	4	0	2	2	0	否	是	移植	已妊娠	临床妊娠	宫内妊娠	双胎宫内妊娠
402	0	C00017984	张娜	≥35	35	1	拮抗剂方案	2	150	≤10天	10	≤3000	1500	HCG	6	0	0	原发不孕	2.853	＞24	24.2	女方因素	7	3.34	1298.33	0.7	4	3.21	6.38	68	2	16	10.8	B	IVF	2	0	2	0	2	2	0	否	是	移植	未妊娠
829	0	C00005682	项庆玲	＜35	28	2	降调节方案	3	221.875	＞10天	12	≤3000	2662.5	HCG	3	0	0	原发不孕	1.96	≤24	19.9	女方因素	5	0.96	1439	0.2	9	5.72	6.38	64	1	11	13.5	A	IVF	7	0	2	0	2	2	0	否	是	移植	未妊娠
1983	1	C00017705	张振林	≥35	37	2	拮抗剂方案	2	300	≤10天	10	≤3000	3000	HCG	7	5	2	继发不孕	2.13	≤24	22.6	女方因素	2	1.57	412	0.78	3	16.17	6.39	59	2	6	13	A-B	IVF	2	0	1	0	1	1	0	否	是	移植	已妊娠	临床妊娠	宫内妊娠	单胎宫内妊娠
57	0	C00016891	王慧杰	＜35	27	1	降调节方案	3	225	＞10天	11	≤3000	2475	HCG	3	0	0	原发不孕	1.87	≤24	18.4	女方因素	9	1.95	2811	1.14	9	5.47	6.4	17	1	17	11.5	A	IVF	2	0	1	0	1	1	0	否	是	移植	未妊娠
106	1	C00010150	李伦伦	＜35	32	1	降调节方案	3	317.647	＞10天	17	＞3000	5400	HCG	4	1	1	继发不孕	1.77	＞24	28.9	女方因素	9	2.22	1870	2.97	7	7.88	6.4	33	1	18	11.3	A-B	IVF	3	0	2	0	0	0	0	否	否	全胚冷冻
47	1	2018010230	田媛	≥35	38	2	降调节方案	3	360.417	＞10天	12	＞3000	4325	HCG	9	0	0	原发不孕	2.47	＞24	24.4	女方因素	9	2.01	2044	1.06	7	7.4	6.41	55.05	2	9	14.5	B	IVF	5	0	2	0	0	0	0	否	否	全胚冷冻
690	0	2017110119	吴玉贞	≥35	36	2	降调节方案	3	187.5	＞10天	12	≤3000	2250	HCG	2	2	1	继发不孕	4.24	≤24	23.4	男方因素	5	7.38	1767	1.47	8	9.91	6.42	41	2	16	10.2	A	ICSI	5	0	2	1	2	2	0	否	是	移植	未妊娠
13	1	2017030223	杨瑞平	≥35	39	1	刺激方案	1	351.923	＞10天	13	＞3000	4575	HCG	2	1	1	继发不孕	2.21	＞24	28.6	男方因素	10	3.75	2800	0.95	6	9.82	6.45	40	2	11	11.8	A	ICSI	1	0	0	0	0	0	0	是		无可移植胚胎
99	1	2017050106	刘爱君	≥35	43	1	降调节方案	3	375	＞10天	12	＞3000	4500	HCG	4	2	1	继发不孕	2.13	＞24	24.8	男方因素	9	4.64	1936	1.9	8	8.56	6.45	45.48	2	17	10	A	ICSI	6	0	2	0	0	0	0	否	否	全胚冷冻
778	0	2016110220	孔海春	＜35	33	1	拮抗剂方案	2	225	≤10天	10	≤3000	2250	HCG	6	2	0	继发不孕	1.82	＞24	24.7	女方因素	5	2.64	1767	0.45	8	8.33	6.45	43.5	1	15	7.8	A	IVF	3	0	0	0	0	0	0	是		无可移植胚胎
814	0	C00008514	公晓琳	＜35	32	3	降调节方案	3	225	≤10天	10	≤3000	2250	HCG	1	1	0	继发不孕	3.08	≤24	24	女方因素	5	0.89	1545	1.04	6	7.79	6.45	82.82	1	20	13	A-B	IVF	6	0	3	0	2	2	0	否	是	移植	未妊娠
1149	1	2016040188	温莹	≥35	43	1	降调节方案	3	350	＞10天	12	＞3000	4200	HCG	4	2	0	继发不孕	1.73	≤24	21.2	女方因素	4	1.35	1274	1.57	4	5.96	6.45	37	2	11	12.6	A	IVF	2	0	2	1	0	0	0	否	否	全胚冷冻
1220	0	2018060170	田超清	≥35	38	4	刺激方案	1	267.857	＞10天	14	＞3000	3750	HCG	11	0	0	原发不孕	1.94	≤24	19	男方因素	4	9.17	1129	0.81	4	8.1	6.45	42	2	10	6.8	A-B	IVF	2	0	2	0	0	0	0	否	否	全胚冷冻
1472	1	C00013213	罗丽	≥35	37	2	刺激方案	1	318.75	≤10天	8	≤3000	2550	HCG	1	1	0	继发不孕	2.88	≤24	23.3	女方因素	3	1.21	892	1.26	2	8.1	6.45	42	2	10	1.2	A	IVF	2	0	2	0	2	2	0	否	是	移植	未妊娠
121	0	2017070228	任万凤	＜35	27	1	降调节方案	3	187.5	≤10天	10	≤3000	1875	HCG	2	0	0	原发不孕	2.53	＞24	27.3	女方因素	9	0.61	1094	1.59	9	4.8	6.46	93.36	1	20	9.4	B	IVF	6	0	0	0	0	0	0	是		无可移植胚胎
227	1	C00009464	刘绍美	≥35	40	1	降调节方案	3	300	≤10天	9	≤3000	2700	HCG	1	1	1	继发不孕	2.4	≤24	23.8	女方因素	8	1.46	1450	2.82	7	4.98	6.46	34.5	2	20	11.5	A	IVF	1	0	0	0	0	0	0	是		无可移植胚胎
301	0	2017120276	任万凤	＜35	27	2	拮抗剂方案	2	275	≤10天	5	≤3000	1375	双扳机	2	0	0	原发不孕	1.23	＞24	27.3	不明原因	7	1.22	2629	1.04	5	4.8	6.46	93.36	1	20	13	A	IVF	5	0	0	0	0	0	0	是		无可移植胚胎
324	1	C00004544	吴平	＜35	27	2	拮抗剂方案	2	395.455	＞10天	11	＞3000	4350	HCG	3	1	0	继发不孕	3.48	＞24	29.3	女方因素	7	2.39	2129	1.06	9	8.91	6.46	23	1	16	12.1	A	IVF	4	0	1	0	1	1	0	否	是	移植	未妊娠
1107	1	C00018307	鲍海艳	≥35	39	1	拮抗剂方案	2	300	≤10天	10	≤3000	3000	HCG	2	0	0	原发不孕	2.47	≤24	18	混合因素	4	1.78	1412.16	1.78	8	7.16	6.46	81.78	2	12	10.8	A	ICSI	6	0	4	2	0	0	0	否	否	全胚冷冻
1502	1	C00010298	张欣彦	≥35	37	2	刺激方案	1	450	≤10天	9	＞3000	4050	HCG	2	2	1	继发不孕	1.7	≤24	22.1	女方因素	3	15.06	954	1.46	3	11.82	6.46	82	2	8	0.24		IVF	2	0	2	0	0	0	0	否	否	全胚冷冻
1550	1	C00012315	刘绍美	≥35	41	2	拮抗剂方案	2	312.5	≤10天	8	≤3000	2500	HCG	1	1	1	继发不孕	1.36	≤24	23.8	混合因素	3	2.53	1153	1.45	4	4.98	6.46	34.5	2	20	0.99	A	ICSI	2	0	2	0	2	2	0	否	是	移植	已妊娠	临床妊娠	宫内妊娠	单胚胎停
322	1	2016080141	吕娜	＜35	34	1	降调节方案	3	450	≤10天	8	＞3000	3600	HCG	2	0	0	原发不孕	1.21	≤24	20.3	女方因素	9	1.65	1702	1.14	7	7.98	6.47	56.76	1	9	15.9	B	IVF	7	0	6	2	2	2	0	否	是	移植	已妊娠	临床妊娠	宫内妊娠	单胎宫内妊娠
958	1	C00003396	邵明娥	≥35	39	2	刺激方案	1	450	≤10天	6	≤3000	2700	HCG	6	2	1	继发不孕	1.9	＞24	26	混合因素	4	10.88	511	1.37	4	20.62	6.47	52	2	8	10	A-B	ICSI	1	0	1	0	1	1	0	否	是	移植	未妊娠
2041	1	2018050133	邵明娥	≥35	38	1	拮抗剂方案	2	375	＞10天	19	＞3000	7125	HCG	6	2	1	继发不孕	1.49	＞24	26	女方因素	1	4.25	664	0.32	2	20.62	6.47	52	2	8	10.7	A	IVF	3	0	1	1	0	0	0	否	否	全胚冷冻
917	1	C00014721	杨冠敏	＜35	34	2	降调节方案	3	362.5	＞10天	12	＞3000	4350	HCG	1	2	1	继发不孕	1.58	≤24	21.8	女方因素	4	1.71	954	0.7	3	5.78	6.48	30	1	8	14.4	A	IVF	2	0	2	2	2	2	0	否	是	移植	未妊娠
137	1	C00003693	赵艳红	＜35	34	1	降调节方案	3	400	≤10天	9	＞3000	3600	HCG	7	1	0	继发不孕	1.53	＞24	47.3	女方因素	8	1.36	1438	1.29	8	5.39	6.49	24.29	1	11	8.5		IVF	5	0	4	0	0	0	0	否	否	全胚冷冻
221	0	C00005318	翟钰	＜35	32	1	降调节方案	3	265.385	＞10天	13	＞3000	3450	HCG	1	2	0	继发不孕	1.96	≤24	20.3	女方因素	8	1.15	1613	0.42	9	8.69	6.49	42	1	14	17.9	B	IVF	2	1	2	0	0	0	0	否	否	全胚冷冻
1090	0	2017110184	边玉梅	＜35	28	2	降调节方案	3	259.091	＞10天	11	≤3000	2850	HCG	3	1	1	继发不孕	2.04	≤24	20.4	男方因素	4	1.94	1477	0.62	5	8.69	6.49	42	1	15	18.8	A	ICSI	2	0	2	0	2	2	0	否	是	移植	未妊娠
1632	0	C00018456	毛毳	≥35	40	1	拮抗剂方案	2	225	≤10天	6	≤3000	1350	HCG	2	1	0	继发不孕	1.33	≤24	17.4	女方因素	2	13.24	906.19	1.8	2	7.98	6.49	47	2	8	10.5	A-B	IVF	0	0	0	0	0	0	0	是		无可移植胚胎
147	1	C00007352	李玲玲	＜35	32	2	刺激方案	1	450	＞10天	13	＞3000	5850	HCG	2	0	0	继发不孕	1.70	≤24	23.7	女方因素	8	1.5	2087	1.44	5	7.34	6.5	30.87	1	10	11.5	B	IVF	4	0	2	0	2	2	0	否	是	移植	未妊娠
342	0	2017050181	梁丽	＜35	26	1	降调节方案	3	256.818	＞10天	11	≤3000	2825	HCG	6	0	0	原发不孕	1.87	≤24	23.9	混合因素	7	6.57	1876	1.09	8	6.16	6.5	25	1	18	12.3	A	ICSI	3	0	2	0	0	0	0	否	否	全胚冷冻
579	0	C00017206	辛园园	＜35	34	1	拮抗剂方案	2	250	＞10天	13	＞3000	3250	HCG	1	0	0	原发不孕	2.1	≤24	17.5	女方因素	6	2.62	1648	0.61	6	13.4	6.5	26	1	9	13.4	A-B	IVF	2	0	1	0	1	1	0	否	是	移植	未妊娠
1734	0	C00018370	辛园园	＜35	34	2	拮抗剂方案	2	225	＞10天	11	≤3000	2475	HCG	1	0	0	原发不孕	2.03	≤24	17.5	男方因素	2	6.06	668.53	0.68	2	13.4	6.5	26	1	9	11.1	A	ICSI	1	0	1	0	1	1	0	否	是	移植	未妊娠
2131	0	C00018070	冷芍遐	＜35	34	3	拮抗剂方案	2	178.125	≤10天	8	≤3000	1425	双扳机	1	2	0	继发不孕	2.38	≤24	19.3	女方因素	4	3.27	813.1	0.36	4	8.64	6.5	46	1	20	11.4	B	IVF	4	0	2	0	0	0	0	否	否	全胚冷冻
187	0	2017110229	赵冉	≥35	35	1	降调节方案	3	206.25	＞10天	12	≤3000	2475	HCG	9	0	0	原发不孕	3.40	≤24	20.1	男方因素	8	1.69	2203	1.02	6	9.2	6.53	20	2	16	13	A	ICSI	2	0	0	0	0	0	0	是		无可移植胚胎
194	0	2018030031	韩秀君	≥35	39	1	降调节方案	3	259.091	＞10天	11	≤3000	2850	HCG	6	5	1	继发不孕	1.30	＞24	27.3	女方因素	8	6.03	2026	0.89	9	10.11	6.53	83.77	2	12	8.8	A	IVF	6	0	3	1	2	2	0	否	是	移植	已妊娠	临床妊娠	宫内妊娠	单胎宫内妊娠
618	1	C00006721	郝福秀	＜35	32	2	降调节方案	3	300	≤10天	9	≤3000	2700	HCG	3	3	0	继发不孕	3.68	≤24	20.4	女方因素	6	2.2	1311	0.56	4	5.2	6.54	21	1	16	12.6	A-B	IVF	3	0	2	0	2	2	0	否	是	移植	未妊娠
1056	1	2018040162	梁宁宁	＜35	33	1	降调节方案	3	394.118	＞10天	17	＞3000	6700	HCG	1	0	0	原发不孕	2.26	＞24	26	女方因素	4	1.03	1689	0.8	6	7.84	6.54	36.6	1	20	20.8	A	IVF	1	0	1	0	0	0	0	否	否	全胚冷冻
85	1	C00016348	NGWA MALAY	＜35	28	1	降调节方案	3	300	≤10天	10	≤3000	3000	HCG	2	1	0	继发不孕	2.18	≤24	18.8	男方因素	9	1.14	2122	0.78	7	8.74	6.57	48	1	12	10.1	A	ICSI	5	0	4	1	2	2	0	否	是	移植	未妊娠
385	0	C00013285	王丽	≥35	46	4	降调节方案	3	242.308	＞10天	13	＞3000	3150	HCG	1	1	1	继发不孕	1.25	≤24	24	女方因素	7	1.11	1566	0.33	5	10.71	6.58	37.78	2	13	10.5	B	IVF	4	0	0	0	0	0	0	是		无可移植胚胎
562	1	C00011626	王丽	≥35	46	3	降调节方案	3	343.75	＞10天	12	＞3000	4125	HCG	1	1	1	继发不孕	1.25	≤24	24	女方因素	6	2.66	1824	1.32	5	10.71	6.58	37.78	2	13	1.12	A-B	IVF	5	0	4	0	2	2	0	否	是	移植	已妊娠	临床妊娠	宫内妊娠	单胚胎停
94	0	2017060163	张贵霞	＜35	32	2	降调节方案	3	156.25	＞10天	12	≤3000	1875	HCG	2	1	1	继发不孕	1.49	≤24	21.8	女方因素	9	1.4	1955	0.84	7	5.44	6.6	55.05	1	15	14.9	A	IVF	5	0	2	0	2	2	0	否	是	移植	已妊娠	临床妊娠	宫内妊娠	双胎宫内妊娠
733	0	2017060023	刘风华	≥35	39	1	刺激方案	1	225	≤10天	7	≤3000	1575	HCG	1	3	1	继发不孕	3.37	＞24	26.7	女方因素	5	15.37	1493.4	1.23	7	14.9	6.6	25	2	10	5.8	A	IVF	5	0	2	0	0	0	0	否	否	全胚冷冻
567	1	C00012087	张雪	＜35	31	1	拮抗剂方案	2	300	≤10天	9	≤3000	2700	HCG	4	0	0	原发不孕	5.43	≤24	18.4	女方因素	6	4.55	1791	0.92	8	11.34	6.61	33	1	20	1.17	A	IVF	3	1	4	0	2	2	0	否	是	移植	未妊娠
735	0	C00015747	于瑶	＜35	34	3	降调节方案	3	205	＞10天	15	＞3000	3075	HCG	4	2	1	继发不孕	2.66	≤24	17.9	男方因素	5	2.44	1470	0.51	7	7.85	6.62	46.98	1	11	8.5	A	ICSI	4	0	4	1	0	0	0	否	否	全胚冷冻
1218	0	C00017642	付学辉	≥35	43	2	拮抗剂方案	2	287.5	＞10天	12	＞3000	3450	HCG	2	3	0	继发不孕	1.28	≤24	19.4	女方因素	4	1.32	1130	1.12	4	14.08	6.62	46.7	2	8	7.3	A	IVF	3	0	2	1	2	2	0	否	是	移植	已妊娠	临床妊娠	宫内妊娠	单胎宫内妊娠
341	0	C00010517	王谦	＜35	29	1	降调节方案	3	195	≤10天	10	≤3000	1950	HCG	1	0	0	原发不孕	2.78	＞24	24.1	女方因素	9	1.82	1916	1.01	8	5.84	6.64	32	1	23	1.03	A-B	IVF	6	0	6	3	2	2	0	否	是	移植	已妊娠	临床妊娠	宫外妊娠	异位妊娠
101	1	2016040270	王圣香	＜35	29	1	降调节方案	3	306.818	＞10天	11	＞3000	3375	HCG	1	0	0	原发不孕	1.23	＞24	24.6	混合因素	7	0.35	1814	1.08	9	6.51	6.65	50.5	1	17	1.4	A	ICSI	6	0	5	3	0	0	0	否	否	全胚冷冻
17	0	2017010071	张光梓	＜35	32	1	降调节方案	3	150	≤10天	9	≤3000	1350	HCG	3	1	0	继发不孕	1.79	≤24	20.9	女方因素	9	0.85	1168	0.63	7	9.33	6.66	35.42	1	14	11	A	IVF	5	0	5	2	2	2	0	否	是	移植	已妊娠	临床妊娠	宫内妊娠	单胎宫内妊娠
158	1	2017090269	姚立春	≥35	37	1	刺激方案	1	300	≤10天	8	≤3000	2400	HCG	6	0	0	原发不孕	2.34	＞24	26.1	女方因素	8	1.25	1823	0.7	6	6.39	6.66	24	2	12	11.2	A	IVF	5	0	2	0	2	2	0	否	是	移植	未妊娠
783	1	2016070062	刘春燕	≥35	40	2	降调节方案	3	390	≤10天	10	＞3000	3900	HCG	1	1	1	继发不孕	1.22	≤24	22.9	女方因素	5	0.68	1734	0.72	6	8.45	6.66	45.95	2	14	15	A	IVF	2	0	1	0	1	1	0	否	是	移植	未妊娠
1486	1	C00011756	陈义花	＜35	28	1	刺激方案	1	300	≤10天	10	≤3000	3000	HCG	3	0	0	原发不孕	1.26	≤24	21.3	女方因素	3	31.49	831	1.81	2	6.58	6.67	46.98	1	6	0.44	A	IVF	0	0	0	0	0	0	0	是		无可移植胚胎
108	0	C00005344	张孝荣	＜35	31	1	拮抗剂方案	2	225	≤10天	7	≤3000	1575	HCG	4	0	0	原发不孕	2.0	≤24	19.5	女方因素	7	1.6	1515	0.86	6	6.67	6.68	43	1	11	11.7	B	IVF	5	0	5	1	2	2	0	否	是	移植	未妊娠
320	0	C00018399	谢琳	≥35	37	2	降调节方案	3	256.25	＞10天	12	＞3000	3075	HCG	1	1	0	继发不孕	1.51	≤24	17.9	男方因素	7	0.58	2174.76	0.83	5	8.77	6.68	65	2	11			ICSI	4	0	2	1	0	0	0	否	否	全胚冷冻
458	1	C00016473	谢琳	≥35	37	1	降调节方案	3	375	＞10天	13	＞3000	4875	HCG	4	0	0	原发不孕	2.75	≤24	17.9	男方因素	6	1	1722	1.33	6	8.77	6.68	65	2	11	14.4	B-C	ICSI	3	0	3	1	2	2	0	否	是	移植	已妊娠	临床妊娠	宫内妊娠	单胚胎停
626	1	2016030158	井绪花	＜35	29	1	降调节方案	3	323.077	＞10天	13	＞3000	4200	HCG	2	1	0	继发不孕	1.4	＞24	35.8	女方因素	6	0.81	1161	0.56	5	9.24	6.68	45	1	28	15	B	IVF	3	0	3	2	2	2	0	否	是	移植	未妊娠
804	1	C00008111	刘静	≥35	43	1	降调节方案	3	350	＞10天	12	＞3000	4200	HCG	2	4	1	继发不孕	2.88	＞24	24.2	女方因素	5	0.99	1603	0.28	5	9.9	6.69	28.73	2	9	1	A-B	IVF	3	0	3	1	0	0	0	否	否	全胚冷冻
88	0	C00010153	鞠元燕	＜35	31	1	拮抗剂方案	2	200	≤10天	9	≤3000	1800	HCG	5	0	0	原发不孕	1.33	＞24	28.9	女方因素	9	2.3	2095	1.09	9	6.54	6.7	78.65	1	15	1.43	A-B	IVF	5	0	2	0	2	2	0	否	是	移植	已妊娠	临床妊娠	宫内妊娠	单胚胎停
1366	1	C00003637	陆田田	≥35	37	5	降调节方案	3	325	＞10天	13	＞3000	4225	HCG	3	1	0	继发不孕	1.29	＞24	28.6	混合因素	3	0.92	516	0.39	2	8.76	6.7	38	2	6	14.8	B	ICSI	3	0	2	1	2	2	0	否	是	移植	已妊娠	临床妊娠	宫内妊娠	单胎宫内妊娠
973	0	2016090031	徐艳俊	＜35	31	2	降调节方案	3	245	＞10天	15	＞3000	3675	HCG	7	1	1	继发不孕	2.23	＞24	25.3	男方因素	4	2.8	1373	1.35	7	6.98	6.72	47.4	1	19	11.4	A	ICSI	4	0	0	0	0	0	0	是		无可移植胚胎
1742	0	C00019066	宋华丽	≥35	37	4	拮抗剂方案	2	150	≤10天	6	≤3000	900	双扳机	3	0	0	原发不孕	1.30	≤24	22.3	混合因素	2	1.76	647.93	0.39	2	9.36	6.72	38	2	8	11.1	B	ICSI	1	0	0	0	0	0	0	是		无可移植胚胎
2075	0	C00018221	宋华丽	≥35	37	2	拮抗剂方案	2	271.875	≤10天	8	≤3000	2175	双扳机	3	0	0	原发不孕	1.23	≤24	22.3	混合因素	1	2.24	544.45	0.18	1	9.36	6.72	38	2	8	10.5	B	ICSI	1	0	1	0	0	0	0	否	否	全胚冷冻
2156	0	C00017360	宋华丽	≥35	37	1	刺激方案	1	283.333	≤10天	9	≤3000	2550	HCG	3	0	0	原发不孕	1.35	≤24	22.3	混合因素	1	7.78	356.7	0.34	0	9.36	6.72	38	2	8	8.3	B		0	0	0	0	0	0	0	是		未取到卵
1325	0	C00019092	赵平丽	≥35	42	1	拮抗剂方案	2	225	≤10天	10	≤3000	2250	HCG	10	2	1	继发不孕	2.03	≤24	22.9	女方因素	3	2.86	671.22	1	5	10.69	6.75	30	2	9	14.2	B	IVF	4	0	2	1	0	0	0	否	否	全胚冷冻
538	0	C00015657	姜圆圆	＜35	34	1	拮抗剂方案	2	218.75	＞10天	12	≤3000	2625	双扳机	2	3	2	继发不孕	3.19	＞24	27.2	女方因素	7	7.69	1702	2.73	8	8.34	6.77	42.2	1	12	11	A	IVF	6	0	6	2	0	0	0	否	否	全胚冷冻
72	1	C00008795	孙树叶	＜35	31	2	降调节方案	3	356.25	＞10天	12	＞3000	4275	HCG	2	2	1	继发不孕	2.01	≤24	23.4	混合因素	9	4.13	2438	1.05	9	7.46	6.78	48	1	11	14	B	ICSI	7	0	2	0	2	2	0	否	是	移植	未妊娠
79	1	C00010672	孙树叶	＜35	31	3	降调节方案	3	400	＞10天	12	＞3000	4800	HCG	2	2	1	继发不孕	1.89	≤24	23.4	混合因素	9	2.15	2254	0.66	5	7.46	6.78	48	1	11	14.6	A-B	ICSI	4	0	2	2	0	0	0	否	否	全胚冷冻
980	1	2016030239	张慧	≥35	40	1	刺激方案	1	350	＞10天	12	＞3000	4200	HCG	5	0	0	继发不孕	1.72	≤24	20.2	女方因素	4	2.18	1350	1.59	7	11.83	6.78	78.43	2	8	9.6	A	IVF	5	0	2	0	0	0	0	否	否	全胚冷冻
1033	0	2017120040	宋飞	＜35	32	1	降调节方案	3	234.091	＞10天	11	≤3000	2575	HCG	3	1	0	继发不孕	1.88	≤24	19.9	不明原因	4	2.82	1129	1.54	7	5.69	6.78	43	1	15	10	A	IVF	2	0	2	0	2	2	0	否	是	移植	已妊娠	临床妊娠	宫内妊娠	单胎宫内妊娠
597	0	C00010762	王樱蓉	＜35	33	1	拮抗剂方案	2	155.357	≤10天	7	≤3000	1087.5	HCG	1	2	0	继发不孕	1.67	≤24	23.8	女方因素	6	6.18	1539	0.65	6	8.14	6.79	44	1	20	13	A-B	IVF	2	0	2	1	0	0	0	否	否	全胚冷冻
938	0	C00005947	高靖亚	＜35	31	2	拮抗剂方案	2	150	≤10天	9	≤3000	1350	HCG	5	1	0	继发不孕	3.47	≤24	21.3	女方因素	4	1.42	819	0.44	3	8.14	6.79	44	1	30	12.7	B	IVF	2	1	2	1	0	0	0	否	否	全胚冷冻
1113	1	C00009647	冯珂珂	＜35	33	1	刺激方案	1	300	≤10天	7	≤3000	2100	HCG	2	0	0	原发不孕	1.24	≤24	18.9	女方因素	4	14.56	1398	0.81	3	9.15	6.81	49	1	6	0.37	A	IVF	3	0	2	0	0	0	0	否	否	全胚冷冻
873	1	2017040127	江秀霞	≥35	42	3	刺激方案	1	313.636	＞10天	11	＞3000	3450	HCG	1	4	1	继发不孕	1.49	≤24	22	女方因素	5	0.98	1178	0.39	6	5.97	6.84	38.25	2	7	12.6	A	IVF	1	0	1	1	0	0	0	否	否	全胚冷冻
1134	1	2018040185	张文	＜35	34	1	拮抗剂方案	2	300	＞10天	13	＞3000	3900	HCG	3	0	0	原发不孕	1.28	≤24	23.9	男方因素	4	1.03	1335	0.31	6	9.84	6.84	35.91	1	8	8.3	B	ICSI	4	0	0	0	0	0	0	是		无可移植胚胎
1528	0	C00004516	李敏敏	＜35	34	2	刺激方案	1	225	≤10天	9	≤3000	2025	HCG	6	0	0	原发不孕	1.04	≤24	21.4	男方因素	3	14.78	798	1.67	4	12.3	6.84	76.46	1	6	5	A	ICSI	3	0	2	1	0	0	0	否	否	全胚冷冻
1705	0	C00016288	李敏敏	≥35	37	6	刺激方案	1	225	≤10天	8	≤3000	1800	HCG	8	0	0	原发不孕	1.04	≤24	21.4	混合因素	2	34.52	741	2.84	0	12.3	6.84	76.46	2	3	0.49	A		0	0	0	0	0	0	0	是		未取到卵
1331	0	2018060102	翟婉婉	＜35	28	1	降调节方案	3	156.25	＞10天	12	≤3000	1875	HCG	2	2	0	继发不孕	2.47	＞24	25.3	女方因素	3	1.37	657	0.59	4	5.94	6.85	33.77	1	20	1.4	B	IVF	0	1	1	0	0	0	0	否	否	全胚冷冻
963	0	C00012313	刘萍	≥35	41	2	拮抗剂方案	2	245.455	＞10天	11	≤3000	2700	HCG	2	2	0	继发不孕	1.67	≤24	18.6	女方因素	4	1.09	389	0.74	2	10.77	6.86	53	2	10	15.3	B	IVF	1	0	1	0	0	0	0	否	否	全胚冷冻
1049	1	C00012895	刘萍	≥35	41	3	拮抗剂方案	2	290.625	≤10天	8	≤3000	2325	HCG	2	2	0	继发不孕	1.53	≤24	18.6	女方因素	4	4.01	1749	0.88	7	10.77	6.86	53	2	11	16.3	A-B	IVF	3	0	2	0	0	0	0	否	否	全胚冷冻
380	0	C00012295	朱红红	＜35	24	1	拮抗剂方案	2	150	≤10天	7	≤3000	1050	HCG	2	0	0	原发不孕	3.08	≤24	22.8	女方因素	8	2.44	2399	0.48	8	6.12	6.87	32.34	1	15	1.19	A	IVF	6	0	6	1	2	2	0	否	是	移植	已妊娠	临床妊娠	宫内妊娠	单胎宫内妊娠
791	1	2016040303	曹令香	≥35	44	1	降调节方案	3	450	≤10天	10	＞3000	4500	HCG	3	2	1	继发不孕	1.54	≤24	22.8	女方因素	5	2.17	1671	0.83	4	5.85	6.87	40.21	2	20	11.2	B	IVF	3	0	2	1	2	2	0	否	是	移植	未妊娠
1776	0	C00012609	王慧	＜35	32	1	刺激方案	1	216.667	≤10天	9	≤3000	1950	HCG	6	1	0	继发不孕	1.5	≤24	23	女方因素	2	1.35	590	0.1	2	14.8	6.88	43.15	1	9	0.6	A	IVF	2	0	2	0	2	2	0	否	是	移植	未妊娠
1887	0	2018030252	夏玉梅	≥35	37	1	降调节方案	3	214.286	≤10天	7	≤3000	1500	HCG	8	3	0	继发不孕	2.36	≤24	23.6	不明原因	2	11.64	499	1.33	3	14.8	6.88	43.15	2	9	3.9	A	IVF	2	0	1	0	0	0	0	否	否	全胚冷冻
502	1	C00011283	宋贵丽	≥35	36	1	拮抗剂方案	2	326.786	＞10天	14	＞3000	4575	HCG	4	1	1	继发不孕	1.89	＞24	26	女方因素	6	2.96	2448	0.57	5	8.05	6.9	81.1	2	9	1.39	A	IVF	4	0	3	1	2	2	0	否	是	移植	已妊娠	临床妊娠	宫内妊娠	双胎宫内妊娠
554	1	C00015845	赵艳霞	≥35	39	1	降调节方案	3	384.091	＞10天	11	＞3000	4225	HCG	1	3	1	继发不孕	1.72	≤24	20.1	男方因素	6	0.63	1876	1.04	5	5.95	6.93	19	2	14	16.2	A-B	ICSI	5	0	2	1	2	2	0	否	是	移植	未妊娠
885	1	C00008219	王媛媛	≥35	45	3	降调节方案	3	328.846	＞10天	13	＞3000	4275	HCG	1	3	1	原发不孕	1.56	≤24	23.5	混合因素	5	1.53	1103	0.31	6	12.29	6.93	49	2	9	8	A	ICSI	3	0	1	0	1	1	0	否	是	移植	未妊娠
643	0	C00005996	柴丽	＜35	31	1	降调节方案	3	265.385	＞10天	13	＞3000	3450	HCG	7	1	0	继发不孕	3.90	≤24	21.2	女方因素	6	1.96	1972	1.67	7	8.69	6.95	21	1	12	14.1	B	IVF	6	0	6	3	2	2	0	否	是	移植	未妊娠
59	0	2018040080	曹静	≥35	37	1	降调节方案	3	265	＞10天	15	＞3000	3975	HCG	3	1	1	继发不孕	1.9	＞24	27.3	女方因素	9	2.38	2800	0.88	4	10.88	6.96	66.43	2	7	15.8	A-B	IVF	1	0	0	0	0	0	0	是		无可移植胚胎
600	0	C00011430	闫志英	＜35	31	1	降调节方案	3	150	≤10天	7	≤3000	1050	HCG	2	1	0	继发不孕	2.32	≤24	21.5	女方因素	6	1.76	1516	1.04	7	6.69	6.96	68	1	20	0.78	A	IVF	5	0	4	1	2	2	0	否	是	移植	未妊娠
1944	1	C00008034	高迎弟	＜35	28	1	刺激方案	1	450	≤10天	8	＞3000	3600	HCG	1	2	1	继发不孕	2.42	≤24	16.4	女方因素	2	9.3	383	0.41	1	14.1	6.97	56	1	8	0.45		IVF	0	0	0	0	0	0	0	是		未受精
135	1	2016090060	JANG SANGYOON	＜35	30	1	降调节方案	3	300	＞10天	11	＞3000	3300	HCG	1	0	0	原发不孕	2.41	≤24	20.4	女方因素	8	3.8	1550	0.2	8	9.72	6.98	41	1	10	13.8	A-B	IVF	0	0	0	0	0	0	0	是		无可移植胚胎
550	1	C00018554	刘霞	≥35	39	1	刺激方案	1	450	≤10天	10	＞3000	4500	HCG	10	1	1	继发不孕	1.41	＞24	24.2	女方因素	6	9.33	1899.12	1.07	4	8.68	6.98	15.65	2	9	9.2	A	IVF	2	0	2	0	0	0	0	否	否	全胚冷冻
666	1	C00010691	张贞贞	≥35	38	1	刺激方案	1	450	≤10天	10	＞3000	4500	HCG	2	2	1	继发不孕	2.42	≤24	20.5	女方因素	5	7.25	1492	0.93	5	5.47	6.98	86.43	2	9	0.7	A	IVF	2	0	2	0	0	0	0	否	否	全胚冷冻
955	0	C00015605	李敏	＜35	32	1	拮抗剂方案	2	225	≤10天	8	≤3000	1800	HCG	3	0	0	原发不孕	2.59	＞24	24.5	女方因素	4	3.05	653	1.06	4	9.72	6.98	41	1	10	0.95	A	IVF	2	0	2	1	2	2	0	否	是	移植	未妊娠
326	0	C00016964	程光玲	＜35	31	1	降调节方案	3	290	＞10天	15	＞3000	4350	HCG	6	1	0	继发不孕	1.62	≤24	21.9	女方因素	7	2.21	2121	0.43	4	9.77	6.99	35	1	12	14.9	A	IVF	2	0	1	1	1	1	0	否	是	移植	已妊娠	临床妊娠	宫内妊娠	单胎宫内妊娠
1404	1	C00003939	沈平平	≥35	39	1	降调节方案	3	409.091	＞10天	11	＞3000	4500	HCG	1	2	1	继发不孕	1.79	≤24	21.5	混合因素	3	1.79	877.05	0.64	6	8.2	6.99	22.13	2	14	13	A	ICSI	2	0	1	0	1	1	0	否	是	移植	未妊娠
1575	1	C00012116	李方珍	≥35	36	3	拮抗剂方案	2	330.556	≤10天	9	≤3000	2975	HCG	4	3	1	继发不孕	2.49	≤24	20.1	女方因素	3	13.74	1065	1.2	3	8	6.99	46.43	2	10	11.7	A	IVF	2	0	1	1	1	1	0	否	是	移植	未妊娠
450	1	2016060020	豆利娜	＜35	34	2	刺激方案	1	375	≤10天	9	＞3000	3375	HCG	12	0	0	原发不孕	2.56	≤24	23.5	混合因素	6	1.56	1798	0.88	8	8.67	7.01	70.1	1	9	8.1	B	ICSI	6	0	2	1	2	2	0	否	是	移植	未妊娠
565	0	2016110047	郝霞	＜35	25	1	刺激方案	1	200	＞10天	18	＞3000	3600	HCG	5	0	0	原发不孕	3.46	≤24	21.1	女方因素	6	2.08	1798	1.03	9	6.04	7.1	29	1	15	12.5	A	IVF	9	0	4	1	2	2	0	否	是	移植	未妊娠
1557	1	C00015054	李娟华	≥35	35	1	刺激方案	1	343.75	＞10天	12	＞3000	4125	HCG	4	4	0	继发不孕	1.42	＞24	25.1	女方因素	3	16.26	1141	1.59	3	11.29	7.11	33	2	11	0.7	A	IVF	1	0	1	0	0	0	0	否	否	全胚冷冻
1297	0	C00009528	于鹏	＜35	33	1	刺激方案	1	202.5	≤10天	10	≤3000	2025	双扳机	4	0	0	原发不孕	1.2	＞24	24.4	混合因素	3	16.28	781	1.28	2	14.94	7.12	40	1	6	8.2	A	ICSI	1	0	1	0	0	0	0	否	否	全胚冷冻
37	1	C00011827	李俊玲	≥35	45	3	刺激方案	1	362.5	＞10天	12	＞3000	4350	HCG	2	2	1	继发不孕	1.96	≤24	22	混合因素	9	1.55	2413	1.28	6	9.73	7.13	46	2	12	10.4	A	ICSI	6	0	4	1	2	2	0	否	是	移植	未妊娠
507	0	C00010644	李俊玲	≥35	45	2	拮抗剂方案	2	287.5	＞10天	12	＞3000	3450	双扳机	1	2	1	继发不孕	2.0	≤24	22	混合因素	6	2.2	2406	1.31	6	9.73	7.13	46	2	12	9.6	A	ICSI	4	0	2	0	2	2	0	否	是	移植	未妊娠
1378	1	C00014637	田美香	≥35	37	1	拮抗剂方案	2	300	≤10天	8	≤3000	2400	HCG	3	2	2	继发不孕	1.642	≤24	23.9	女方因素	3	22.83	398	1.18	1	9	7.13	65.69	2	7	12.7	A-B	IVF	1	0	1	1	1	1	0	否	是	移植	未妊娠
1491	1	2016050047	王允花	＜35	29	1	降调节方案	3	450	≤10天	9	＞3000	4050	HCG	4	2	1	继发不孕	1.62	≤24	23.4	女方因素	3	1.24	805	0.66	3	11.29	7.14	42	1	7	12	A	IVF	3	0	2	0	2	2	0	否	是	移植	未妊娠
387	0	C00018011	陈海燕	≥35	38	4	拮抗剂方案	2	250	≤10天	10	≤3000	2500	HCG	2	2	1	继发不孕	3.06	≤24	23.3	女方因素	7	4.7	1526.24	0.65	6	10.95	7.15	64	2	10	9.4	B-C	IVF	4	0	2	0	2	2	0	否	是	移植	未妊娠
677	1	C00012538	赵丽	＜35	34	2	刺激方案	1	300	≤10天	7	≤3000	2100	HCG	3	0	0	原发不孕	1.26	≤24	21.5	男方因素	5	21.51	1836	1.59	3	6.83	7.15	73	1	7	0.78	A	IVF	0	0	0	0	0	0	0	是		无可移植胚胎
747	1	C00011845	赵丽	＜35	34	1	刺激方案	1	300	≤10天	7	≤3000	2100	HCG	3	0	0	原发不孕	1.22	≤24	21.5	男方因素	5	19.71	1416	0.88	2	6.83	7.15	73	1	7	0.8	C	IVF	0	0	0	0	0	0	0	是		未受精
1257	1	C00013238	陈海燕	≥35	37	2	刺激方案	1	315	≤10天	10	＞3000	3150	HCG	2	2	1	继发不孕	2.999	≤24	23.3	女方因素	3	3.7	897	1.15	0	10.95	7.15	64	2	10	12.3	B		0	0	0	0	0	0	0	是		未取到卵
24	1	2017120133	陈晓霞	≥35	41	2	降调节方案	3	328.846	＞10天	13	＞3000	4275	HCG	1	5	1	继发不孕	1.46	≤24	23.7	男方因素	10	1.5	1621	1.02	8	7.4	7.16	78.43	2	12	9.4	A	ICSI	8	0	4	1	2	2	0	否	是	移植	未妊娠
595	0	C00013287	董蕊蕊	≥35	37	2	刺激方案	1	287.5	≤10天	6	≤3000	1725	HCG	3	2	1	继发不孕	2.31	≤24	20.8	女方因素	6	1.99	1540	0.59	4	6.13	7.19	14	2	11	1.47	B	IVF	1	0	0	0	0	0	0	是		无可移植胚胎
630	0	C00018369	张文菲	＜35	30	2	拮抗剂方案	2	228.75	≤10天	10	≤3000	2287.5	HCG	1	1	0	继发不孕	1.22	＞24	33.7	女方因素	6	2.63	1072.21	1.2	3	6.14	7.19	23	1	45	11.9	A	IVF	0	0	1	0	1	1	0	否	是	移植	已妊娠	临床妊娠	宫内妊娠	单胎宫内妊娠
807	1	C00012934	吕玉梅	≥35	40	1	拮抗剂方案	2	300	≤10天	7	≤3000	2100	HCG	2	5	1	继发不孕	1.86	＞24	24.9	女方因素	5	7.8	1583	0.79	4	7.19	7.19	51.82	2	8	5.3	A	IVF	1	0	2	0	0	0	0	否	否	全胚冷冻
1253	1	C00013045	吕玻霞	≥35	38	1	刺激方案	1	300	≤10天	8	≤3000	2400	HCG	1	1	1	继发不孕	1.6	＞24	33.1	女方因素	3	7.9	904	0.64	3	6.49	7.19	79	2	8	1.33	A	IVF	0	1	1	0	0	0	0	否	否	全胚冷冻
298	1	2016050167	于晓艳	＜35	34	1	降调节方案	3	300	≤10天	9	≤3000	2700	HCG	6	0	0	原发不孕	1.61	≤24	23.6	男方因素	7	8.1	2675	1.53	3	14.8	7.22	46.43	1	6	9.69	B	ICSI	1	0	1	0	1	1	0	否	是	移植	未妊娠
308	0	C00017765	吴斌斌	＜35	32	2	降调节方案	3	275	＞10天	12	＞3000	3300	HCG	5	4	0	继发不孕	1.27	≤24	23.5	混合因素	7	1.46	2327.45	1.47	6	8.02	7.23	22	1	22	6.9	B	ICSI	3	0	0	0	0	0	0	是		无可移植胚胎
825	1	2018070118	薛秀英	≥35	42	2	拮抗剂方案	2	300	≤10天	9	≤3000	2700	HCG	4	6	1	继发不孕	2.55	≤24	21.8	男方因素	5	21.63	1461	1.41	3	9.67	7.23	45.67	2	8	11.5	A	ICSI	1	0	1	0	0	0	0	否	否	全胚冷冻
860	0	C00003963	薛秀英	≥35	42	3	降调节方案	3	253.125	＞10天	12	＞3000	3037.5	HCG	4	6	1	继发不孕	1.26	≤24	21.8	男方因素	5	1.11	1255	0.91	5	9.67	7.23	43.67	2	8	11.2	A-B	ICSI	3	0	4	0	2	2	0	否	是	移植	未妊娠
1004	0	2018030265	薛秀英	≥35	42	1	拮抗剂方案	2	253.846	＞10天	13	＞3000	3300	HCG	4	6	1	继发不孕	1.35	≤24	21.8	女方因素	4	3.73	1247	0.71	4	9.67	7.23	44.67	2	8	4.1		IVF	1	0	0	0	0	0	0	是		无可移植胚胎
1361	1	C00010926	于兰芳	≥35	41	1	拮抗剂方案	2	300	≤10天	8	≤3000	2400	双扳机	3	4	1	继发不孕	1.38	≤24	20	女方因素	3	5.27	549	0.78	1	6.33	7.23	41.75	2	8	7.1	B	IVF	1	0	0	0	0	0	0	是		无可移植胚胎
1903	1	C00011995	于兰芳	≥35	42	2	拮抗剂方案	2	334.091	＞10天	11	＞3000	3675	HCG	3	4	1	继发不孕	1.28	≤24	20	女方因素	2	10.27	512	0.46	3	6.33	7.23	41.75	2	8	6.3	B	IVF	1	0	1	0	1	1	0	否	是	移植	未妊娠
1535	0	C00019142	马姣姣	＜35	24	2	刺激方案	1	281.25	＞10天	12	＞3000	3375	HCG	2	1	0	继发不孕	1.41	＞24	29.3	混合因素	3	3.63	1206.81	1.27	3	7.16	7.26	85.18	1	11	6.4	B	ICSI	1	0	0	0	0	0	0	是		无可移植胚胎
1387	1	C00019469	谢玲燕	≥35	41	1	刺激方案	1	300	≤10天	9	≤3000	2700	HCG	3	0	0	原发不孕	1.62	≤24	17	女方因素	3	24.38	910	1.68	6	10.18	7.27	55.42	2	10	6.4	B-C	IVF	1	0	1	0	0	0	0	否	否	全胚冷冻
422	1	2016020129	丁海霞	≥35	40	1	降调节方案	3	300	≤10天	7	≤3000	2100	HCG	1	2	2	继发不孕	1.33	≤24	23.4	女方因素	7	1.07	1838	1.26	9	7.61	7.33	26	2	15	8.4	A	IVF	3	0	2	1	2	2	0	否	是	移植	未妊娠
953	0	C00018006	邢卿	＜35	31	3	拮抗剂方案	2	200	≤10天	9	≤3000	1800	HCG	2	1	0	继发不孕	2.86	≤24	18.1	女方因素	4	6.01	676	0.84	4	12.19	7.34	72	1	11	11.6	A	IVF	4	0	4	2	2	2	0	否	是	移植	已妊娠	临床妊娠	宫内妊娠	单胎宫内妊娠
1473	1	C00015135	邢卿	＜35	31	1	刺激方案	1	300	≤10天	7	≤3000	2100	HCG	2	1	0	继发不孕	1.6	≤24	18.1	女方因素	3	21.65	890	1.47	2	12.19	7.34	72	1	11	0.5	A	IVF	1	0	0	0	0	0	0	是		无可移植胚胎
53	0	C00006087	王秋月	＜35	27	1	拮抗剂方案	2	181.25	＞10天	12	≤3000	2175	双扳机	2	1	0	继发不孕	1.51	＞24	32.8	女方因素	9	1.55	2944	0.7	8	3.26	7.37	46	1	40	8.8	A	IVF	4	0	2	0	2	2	0	否	是	移植	已妊娠	临床妊娠	宫内妊娠	双胎胎停
812	0	2018030074	槐琳琳	＜35	30	1	拮抗剂方案	2	215	≤10天	10	≤3000	2150	HCG	5	0	0	原发不孕	2.82	≤24	19.6	女方因素	5	4.66	1553	1.08	4	5.41	7.37	43.13	1	8	12.7	A	IVF	3	0	1	0	1	1	0	否	是	移植	未妊娠
193	0	2016010028	袁珍珍	＜35	28	1	降调节方案	3	281.25	＞10天	12	＞3000	3375	HCG	2	0	0	原发不孕	3.09	≤24	21.5	混合因素	8	1.99	2038	0.95	8	7.03	7.4	26	1	15	14	A-B	ICSI	8	0	2	0	2	2	0	否	是	移植	未妊娠
725	1	C00007295	牛春霞	≥35	41	1	拮抗剂方案	2	391.667	≤10天	9	＞3000	3525	HCG	3	0	0	继发不孕	2.4	≤24	21.5	女方因素	5	7.56	1548	0.99	5	8.18	7.4	36	2	14	15.1	B	IVF	2	0	0	2	0	0	0	否	否	全胚冷冻
1713	1	C00017258	陈相花	≥35	42	1	拮抗剂方案	2	300	≤10天	9	≤3000	2700	HCG	1	2	1	继发不孕	1.39	≤24	20.6	女方因素	2	1.1	725	0.3	3	16.73	7.41	23	2	8	11.3	A	IVF	1	1	2	0	0	0	0	否	否	全胚冷冻
14	0	C00012665	刘聪聪	＜35	34	1	拮抗剂方案	2	272.917	＞10天	12	＞3000	3275	HCG	8	0	0	原发不孕	5.43	≤24	21	女方因素	10	3.41	2691	0.85	8	12.53	7.45	34	1	18	15.6	A-B	IVF	4	0	2	0	0	0	0	否	否	全胚冷冻
525	1	C00012712	栗杨杨	≥35	35	1	刺激方案	1	375	≤10天	9	＞3000	3375	HCG	4	2	1	继发不孕	2.56	≤24	19.6	女方因素	7	4.24	2070	0.6	8	11.97	7.45	37	2	14	1.63	B	IVF	8	0	6	3	2	2	0	否	是	移植	已妊娠	临床妊娠	宫内妊娠	单胎宫内妊娠
1044	0	C00014963	邱燕燕	≥35	39	1	降调节方案	3	280.208	＞10天	12	＞3000	3362.5	HCG	4	1	1	继发不孕	1.67	＞24	30	女方因素	4	3.91	1773	0.87	4	8.13	7.47	58	2	12			IVF	2	0	0	0	0	0	0	是		无可移植胚胎
434	0	C00012369	苏琳惠	＜35	26	1	降调节方案	3	225	＞10天	14	＞3000	3150	HCG	2	0	0	原发不孕	5.13	≤24	23	女方因素	6	1.27	862	0.19	4	7.51	7.5	46	1	55	13.7	B	IVF	3	0	2	1	2	2	0	否	是	移植	已妊娠	临床妊娠	宫内妊娠	单胎宫内妊娠
693	1	C00006220	邹琳	＜35	33	6	刺激方案	1	429.545	＞10天	11	＞3000	4725	HCG	1	2	0	继发不孕	1.56	≤24	23.8	女方因素	5	8.22	1752	1.24	4	7.8	7.54	76.43	1	7	0.6	A-B	IVF	2	0	1	0	0	0	0	否	否	全胚冷冻
817	1	C00003286	邹琳	＜35	32	5	刺激方案	1	412.5	≤10天	10	＞3000	4125	HCG	1	2	0	继发不孕	1.2	≤24	23.8	女方因素	5	8.45	1512	0.95	4	7.8	7.54	76.43	1	8	5.1	A-B	IVF	2	0	2	1	0	0	0	否	否	全胚冷冻
1025	1	2016120140	邹琳	＜35	30	3	刺激方案	1	375	≤10天	8	≤3000	3000	HCG	1	1	0	原发不孕	1.49	≤24	23.8	女方因素	4	3.27	1159	1.41	3	8.75	7.54	46.43	1	8	18.7	A	IVF	3	0	2	0	0	0	0	否	否	全胚冷冻
808	0	2016070042	张苗	≥35	36	3	降调节方案	3	281.25	＞10天	12	＞3000	3375	HCG	11	0	0	原发不孕	1.48	＞24	25.7	混合因素	5	2.58	1570	0.25	5	7.5	7.58	26	2	11	10.6	A	ICSI	4	0	4	2	2	2	0	否	是	移植	已妊娠	临床妊娠	宫内妊娠	单胎宫内妊娠
849	0	C00006373	韩艳青	＜35	30	2	刺激方案	1	225	≤10天	8	≤3000	1800	双扳机	3	0	0	原发不孕	2.69	＞24	25.3	女方因素	5	1.96	1320	0.63	5	8.98	7.66	62	1	9	10.2	A-B	IVF	3	0	3	1	0	0	0	否	否	全胚冷冻
1014	1	2017060037	陈作梅	≥35	44	3	刺激方案	1	300	≤10天	7	≤3000	2100	HCG	1	3	1	继发不孕	1.9	＞24	27.5	女方因素	4	7.31	1212	0.86	5	7.26	7.68	102	2	10	6.8	A-B	IVF	3	0	2	0	0	0	0	否	否	全胚冷冻
820	1	C00019160	高玉红	≥35	40	1	拮抗剂方案	2	300	＞10天	11	＞3000	3300	双扳机	12	0	0	原发不孕	1.49	≤24	21.5	女方因素	5	1.48	1497.8	2.2	4	9.87	7.69	65.69	2	8	12.5	A-B	IVF	2	0	1	0	0	0	0	否	否	全胚冷冻
1980	0	2017100205	赵珂	≥35	37	2	刺激方案	1	225	≤10天	5	≤3000	1125	HCG	2	0	0	原发不孕	1.32	≤24	19.4	女方因素	2	14.08	417	0.87	4	8.93	7.8	38.08	2	8	6.9	B	IVF	2	0	1	0	0	0	0	否	否	全胚冷冻
1534	0	2016120052	刘安平	＜35	28	1	降调节方案	3	161.842	＞10天	19	＞3000	3075	HCG	5	1	0	继发不孕	3.80	≤24	20.3	不明原因	3	0.37	1217	0.79	4	9.55	7.88	45.42	1	31	13.6	A-B	IVF	2	0	2	0	0	0	0	否	否	全胚冷冻
1938	0	2017040041	解明明	≥35	38	1	刺激方案	1	225	≤10天	7	≤3000	1575	HCG	3	0	0	原发不孕	1.23	＞24	24.9	女方因素	2	3.06	417	0.55	2	12.2	7.89	25.42	2	8	8.5	A	IVF	1	0	1	0	1	1	0	否	是	移植	已妊娠	临床妊娠	宫内妊娠	单胎宫内妊娠
687	1	2018060062	牟文霞	＜35	30	1	降调节方案	3	426.562	＞10天	16	＞3000	6825	HCG	1	0	0	原发不孕	1.95	≤24	22	女方因素	5	0.84	1782	1.42	5	8.1	7.9	36.45	1	7	13.4	A	IVF	2	0	2	0	2	2	0	否	是	移植	已妊娠	临床妊娠	宫内妊娠	双胎宫内妊娠
1330	0	2016020045	赵莉莉	＜35	33	1	降调节方案	3	211.765	＞10天	17	＞3000	3600	HCG	1	2	0	继发不孕	3.33	≤24	20.3	不明原因	7	0.14	1899	0.84	8	14.18	7.91	99.09	1	13	14.3	A	IVF	7	0	7	5	2	2	0	否	是	移植	未妊娠
56	0	C00015466	李亚平	＜35	29	1	降调节方案	3	203.125	＞10天	12	≤3000	2437.5	HCG	1	0	0	原发不孕	1.5	≤24	24	女方因素	9	2.02	2819	1.3	7	4.64	7.95	39	1	22	12.2	A-B	IVF	4	0	2	0	2	2	0	否	是	移植	未妊娠
1012	0	C00011127	刘茜茜	＜35	30	1	刺激方案	1	225	≤10天	7	≤3000	1575	HCG	1	0	0	原发不孕	1.93	≤24	18.7	女方因素	4	15.97	1228	1.65	3	5.75	7.99	65.76	1	7	9.6	B	IVF	1	0	1	0	0	0	0	否	否	全胚冷冻
12	1	2017030301	徐梅英	＜35	25	1	降调节方案	3	310	＞10天	15	＞3000	4650	HCG	4	0	0	原发不孕	2.57	＞24	30.4	女方因素	10	5.56	2800	1.72	6	10.75	8.01	48	1	13	12.5	A-B	IVF	3	0	2	0	0	0	0	否	否	全胚冷冻
598	1	2017080099	杨晓妮	≥35	38	1	降调节方案	3	310.714	＞10天	14	＞3000	4350	HCG	1	2	1	继发不孕	1.91	＞24	25.4	女方因素	6	3.29	1528	0.84	8	8.17	8.05	64.74	2	14	10.5	A-B	IVF	3	0	3	0	0	0	0	否	否	全胚冷冻
631	1	C00017243	周琦	＜35	29	1	降调节方案	3	346.154	＞10天	13	＞3000	4500	HCG	3	0	0	原发不孕	6.76	＞24	26.3	女方因素	6	0.4	1048	1	1	6.28	8.05	45	1	50	11.2	A	IVF	0	0	0	0	0	0	0	是		无可移植胚胎
180	0	2017060039	杨冠敏	＜35	31	1	降调节方案	3	156.25	＞10天	12	≤3000	1875	HCG	4	0	0	原发不孕	2.77	≤24	21.8	女方因素	8	1.59	2307	0.81	8	6.34	8.06	44	1	12	13.2	A-B	IVF	7	0	4	1	2	2	0	否	是	移植	已妊娠	临床妊娠	宫内妊娠	双胎宫内妊娠
239	0	2018010095	王志丽	≥35	38	1	降调节方案	3	200	＞10天	11	≤3000	2200	HCG	5	1	0	继发不孕	2.67	＞24	29.7	不明原因	8	0.83	1072	0.94	8	6.34	8.06	44	2	15	13.9	A	IVF	4	0	2	0	0	0	0	否	否	全胚冷冻
907	1	2018060187	张春霞	≥35	46	1	拮抗剂方案	2	347.5	≤10天	10	＞3000	3475	HCG	1	2	1	继发不孕	2.46	≤24	20.9	男方因素	4	0.95	975	1.2	6	10.2	8.09	35.42	2	8	12.8	A-B	ICSI	3	0	0	0	0	0	0	是		无可移植胚胎
871	1	2017050231	纪洪秀	≥35	41	2	降调节方案	3	305.769	＞10天	13	＞3000	3975	HCG	5	2	2	继发不孕	1.47	≤24	23.3	女方因素	5	0.78	1192	0.34	5	10.14	8.11	84.41	2	9	20.8	A	IVF	4	0	4	2	0	0	0	否	否	全胚冷冻
1144	0	2016050055	纪洪秀	≥35	40	1	降调节方案	3	244.231	＞10天	13	＞3000	3175	HCG	5	2	2	继发不孕	1.26	≤24	23.3	女方因素	4	0.61	1298	0.61	5	10.14	8.11	84.41	2	9	17.3	A	IVF	4	0	4	3	2	2	0	否	是	移植	未妊娠
339	1	C00014262	荆会贤	≥35	39	1	降调节方案	3	300	＞10天	11	＞3000	3300	HCG	5	2	1	继发不孕	1.89	≤24	22.4	女方因素	9	4	2484	0.49	7	8.34	8.12	48.96	2	11	12.6	A	IVF	6	0	6	4	2	2	0	否	是	移植	已妊娠	临床妊娠	宫内妊娠	单胎宫内妊娠
2199	1	C00015421	杨晓棠	≥35	36	1	降调节方案	3	355.263	＞10天	19	＞3000	6750	HCG	3	2	0	继发不孕	3.2	＞24	27.3	混合因素	1	0.72	259	0.56	1	4.55	8.14	31	2	28	9.3	B	ICSI	1	0	1	0	0	0	0	否	否	全胚冷冻
457	0	C00016726	李迎迎	＜35	33	1	降调节方案	3	225	＞10天	15	＞3000	3375	HCG	8	1	1	继发不孕	3.033	＞24	31.1	女方因素	6	0.49	1724	0.35	7	6.76	8.16	54	1	36	13.3	B	IVF	3	0	2	0	2	2	0	否	是	移植	已妊娠	临床妊娠	宫内妊娠	单胎宫内妊娠
161	0	C00018424	黄纪凤	＜35	30	1	降调节方案	3	261.765	＞10天	17	＞3000	4450	HCG	4	0	0	原发不孕	1.86	≤24	17.6	不明原因	8	1.08	1793	1.08	7	8.22	8.17	46.5	1	13	16.6	A	IVF	3	0	1	1	1	1	0	否	是	移植	未妊娠
371	0	C00015710	盖向荣	≥35	36	1	降调节方案	3	286.364	＞10天	11	＞3000	3150	HCG	1	2	1	继发不孕	2.5	≤24	21	女方因素	7	1.67	1694	1.98	8	7.06	8.21	33.6	2	22	11.5	A	IVF	7	0	2	1	2	2	0	否	是	移植	已妊娠	临床妊娠	宫内妊娠	单胎宫内妊娠
669	1	C00011299	李珊珊	＜35	34	1	刺激方案	1	300	≤10天	7	≤3000	2100	HCG	6	1	0	继发不孕	1.52	≤24	17.1	女方因素	5	25.58	1401	2.09	4	8.76	8.22	42	1	12	5.2	B	IVF	1	0	1	0	0	0	0	否	否	全胚冷冻
1458	1	C00005243	李莉萍	≥35	36	5	刺激方案	1	412.5	＞10天	14	＞3000	5775	HCG	4	2	1	继发不孕	2.87	≤24	19.2	男方因素	3	2.99	886	0.5	3	9.9	8.22	93	2	6	7.2	B-C	ICSI	3	0	2	2	0	0	0	否	否	全胚冷冻
1792	0	2016040269	王丽红	＜35	33	1	降调节方案	3	265.385	＞10天	13	＞3000	3450	HCG	3	3	1	继发不孕	2.35	＞24	29.1	混合因素	2	1.74	556	0.5	2	8.76	8.22	42	1	12	16.7	A-B	ICSI	1	0	1	0	0	0	0	否	否	全胚冷冻
427	1	2017040152	李莉萍	＜35	34	1	刺激方案	1	405	≤10天	10	＞3000	4050	HCG	3	2	1	继发不孕	1.94	≤24	19.2	女方因素	6	2.75	963	1.47	6	8.66	8.23	43.5	1	9	8.2	B	IVF	2	0	1	1	0	0	0	否	否	全胚冷冻
500	0	2017070167	李莉萍	＜35	34	2	刺激方案	1	217.5	≤10天	10	≤3000	2175	HCG	3	2	1	继发不孕	2.71	≤24	19.2	女方因素	6	9.74	2487	1.06	7	11.66	8.23	44	1	9	6.2	A	IVF	2	0	2	0	0	0	0	否	否	全胚冷冻
1465	1	2018050217	李莉萍	≥35	35	3	降调节方案	3	381.25	＞10天	12	＞3000	4575	HCG	4	2	1	继发不孕	1.94	≤24	19.2	男方因素	3	0.63	957	1.32	3	8.66	8.23	43.5	2	9	7.5	A	ICSI	3	0	3	1	2	2	0	否	否	全胚冷冻
379	1	2017010027	王凤儒	≥35	38	3	降调节方案	3	340.909	＞10天	11	＞3000	3750	HCG	1	3	1	继发不孕	1.53	≤24	22.5	女方因素	7	1.28	1593	0.38	3	8.42	8.32	73.4	2	10	16.6	B	IVF	1	0	1	1	0	0	0	否	否	全胚冷冻
876	0	2017010020	闫磊	＜35	30	1	降调节方案	3	176.786	＞10天	14	≤3000	2475	HCG	1	0	0	继发不孕	2.5	＞24	29.9	女方因素	5	1.49	1168	0.27	4	7.26	8.33	91.75	1	7	11.5	B	IVF	4	0	0	0	0	0	0	是		无可移植胚胎
979	0	2016040017	刘婷	＜35	29	2	拮抗剂方案	2	150	≤10天	7	≤3000	1050	HCG	3	0	0	原发不孕	3.06	＞24	26.3	女方因素	4	4.69	1355	0.54	3	5.63	8.38	35.42	1	46	12.2	B	IVF	0	0	0	0	0	0	0	否	否	全胚冷冻
84	0	C00012078	孔祥雯	＜35	31	1	拮抗剂方案	2	204.545	＞10天	11	≤3000	2250	HCG	3	0	0	原发不孕	3.12	≤24	22.2	女方因素	9	4.27	2129	0.66	5	5.82	8.45	40	1	38	1.15	A	IVF	4	0	2	0	2	2	0	否	是	移植	已妊娠	临床妊娠	宫内妊娠	双胎宫内妊娠
1290	1	C00004343	张心颖	≥35	41	3	拮抗剂方案	2	300	≤10天	9	≤3000	2700	HCG	1	1	0	继发不孕	1.2	≤24	19	混合因素	3	1.68	810	2.64	5	9.65	8.46	46.89	2	9	12.3	A	ICSI	4	0	0	0	0	0	0	是		无可移植胚胎
156	1	2017100150	景黄燕	＜35	24	1	降调节方案	3	291.667	＞10天	12	＞3000	3500	HCG	1	0	0	原发不孕	3.19	≤24	17.7	女方因素	8	0.29	1832	0.9	8	7.09	8.48	18	1	18	9.7	A	IVF	4	0	3	1	2	2	0	否	是	移植	未妊娠
1678	1	C00009649	巩金	＜35	33	1	降调节方案	3	334.091	＞10天	11	＞3000	3675	HCG	1	0	0	原发不孕	1.66	≤24	20.8	男方因素	2	3.5	805	0.9	3	12.12	8.51	65.98	1	8	10.2	A	ICSI	1	0	2	0	2	2	0	否	是	移植	已妊娠	临床妊娠	宫内妊娠	单胎宫内妊娠
394	1	2016100191	朱艳苓	≥35	37	1	刺激方案	1	380.357	＞10天	14	＞3000	5325	HCG	12	4	1	继发不孕	1.44	≤24	18	女方因素	7	1.77	1394	2.45	4	10.99	8.56	77.07	2	7	15	A-B	IVF	3	0	0	0	0	0	0	是		无可移植胚胎
1312	0	2016070004	陈娟	≥35	38	1	刺激方案	1	281.25	＞10天	20	＞3000	5625	HCG	2	1	1	继发不孕	1.85	＞24	29	女方因素	3	1.76	729	0.36	2	7.09	8.61	86.43	2	11	8.9	B	IVF	1	0	0	0	0	0	0	是		无可移植胚胎
1332	1	2017010026	陈娟	≥35	38	2	刺激方案	1	351.923	＞10天	13	＞3000	4575	HCG	2	1	1	继发不孕	2.02	＞24	29	男方因素	3	5.09	655	0.66	1	7.09	8.61	46.43	2	11	12.2	B	ICSI	1	0	1	1	1	1	0	否	是	移植	未妊娠
1509	0	2017040021	陈娟	≥35	39	3	刺激方案	1	150	≤10天	9	≤3000	1350	HCG	2	1	1	继发不孕	1.6	＞24	29	男方因素	3	11.52	887	0.65	3	7.09	8.61	38.43	2	11	8.3	B	ICSI	1	0	1	1	0	0	0	否	否	全胚冷冻
1563	0	2017070070	陈娟	≥35	39	4	刺激方案	1	266.667	≤10天	9	≤3000	2400	HCG	2	1	1	继发不孕	1.66	＞24	29	男方因素	3	8.69	1103	0.35	3	7.09	8.61	46.43	2	5	6.5	B	ICSI	3	0	2	0	0	0	0	否	否	全胚冷冻
264	1	2016110269	张汝燕	＜35	33	2	刺激方案	1	300	≤10天	10	≤3000	3000	HCG	8	1	1	原发不孕	1.96	≤24	17.7	女方因素	7	1.42	2466	1.59	6	8.65	8.68	39	1	9	11.9	A	IVF	5	0	4	3	0	0	0	否	否	全胚冷冻
10	1	2017110162	张杨	＜35	31	1	降调节方案	3	325	＞10天	12	＞3000	3900	HCG	5	2	1	继发不孕	3.73	＞24	25.4	女方因素	9	0.81	2493	0.63	8	6.62	8.7	40.37	1	12	11.9	A	IVF	6	0	5	4	2	2	0	否	是	移植	已妊娠	临床妊娠	宫内妊娠	双胎宫内妊娠
279	1	C00011826	罗秀琴	≥35	39	1	刺激方案	1	306.25	＞10天	12	＞3000	3675	HCG	8	1	1	继发不孕	1.57	≤24	23	女方因素	7	20.11	1212	2.38	2	7.23	8.7	14	2	18	0.46	B	IVF	1	0	1	0	0	0	0	否	否	全胚冷冻
699	0	2018040131	李贵玲	≥35	44	1	刺激方案	1	225	≤10天	7	≤3000	1575	HCG	2	7	2	继发不孕	1.29	≤24	21.8	女方因素	5	12.34	1692	1.02	5	8.16	8.7	27	2	10	5.3	A	IVF	3	0	2	0	0	0	0	否	否	全胚冷冻
1406	1	C00003471	李贵玲	≥35	44	2	刺激方案	1	300	≤10天	7	≤3000	2100	双扳机	2	7	2	继发不孕	1.53	≤24	21.8	女方因素	3	16.79	873.78	0.81	2	8.16	8.7	27	2	10	4.7	B	IVF	0	0	2	0	0	0	0	否	否	全胚冷冻
915	1	C00011619	化树慧	≥35	41	2	拮抗剂方案	2	300	≤10天	10	≤3000	3000	HCG	1	1	0	继发不孕	1.73	＞24	31.6	混合因素	4	2.78	957	0.79	2	11.77	8.74	35.21	2	8	15.7	A-B	ICSI	1	0	1	0	1	2	0	否	是	移植	已妊娠	临床妊娠	宫内妊娠	单胎宫内妊娠
435	0	2016110177	王颖	≥35	43	1	刺激方案	1	150	≤10天	9	≤3000	1350	HCG	1	3	1	继发不孕	1.49	＞24	24.9	混合因素	6	10.6	838	0.96	6	8.16	8.76	53.77	2	9	5	A	ICSI	3	0	2	0	0	0	0	否	否	全胚冷冻
188	0	2018050074	金瑾	＜35	29	1	降调节方案	3	135.577	＞10天	13	≤3000	1762.5	HCG	6	0	0	原发不孕	3.63	＞24	24.8	女方因素	8	0.88	2141	0.97	6	6.24	8.78	46.43	1	40	7.2	B	IVF	3	0	3	1	0	0	0	否	否	全胚冷冻
674	0	2017010044	石龙菊	＜35	26	1	降调节方案	3	262.5	＞10天	12	＞3000	3150	HCG	1	0	0	原发不孕	2.18	≤24	20.8	女方因素	5	2.48	1870	1.17	5	6.77	8.84	49	1	10	19.4	A-B	IVF	3	0	2	0	0	0	0	否	否	全胚冷冻
969	0	2017080215	刘美红	≥35	39	2	刺激方案	1	187.5	≤10天	8	≤3000	1500	HCG	2	3	1	继发不孕	3.47	≤24	18.8	女方因素	4	11.63	1390	1.04	5	12.13	8.84	39.46	2	9	6	C	IVF	2	0	2	1	0	0	0	否	否	全胚冷冻
564	1	2017040097	朱静	＜35	28	1	刺激方案	1	403.125	＞10天	16	＞3000	6450	HCG	2	0	0	原发不孕	3.92	＞24	28.7	女方因素	6	3.23	1800	1.25	7	11.19	8.9	70	1	13	8.5	B	IVF	3	0	1	0	0	0	0	否	否	全胚冷冻
632	0	C00018985	王翠	≥35	36	3	拮抗剂方案	2	225	＞10天	13	≤3000	2925	HCG	1	2	0	继发不孕	3.91	≤24	23	女方因素	6	4.69	1042.15	0.96	4	5.67	8.94	30.6	2	42	9.5	B	IVF	3	0	2	1	2	2	0	否	是	移植	已妊娠	临床妊娠	宫内妊娠	单胎宫内妊娠
197	0	C00018701	李彦红	＜35	34	1	拮抗剂方案	2	200	≤10天	8	≤3000	1600	HCG	6	1	0	继发不孕	2.88	≤24	21.6	女方因素	5	3.23	931.47	0.55	7	6.39	9.16	39.5	1	15	8.8	A-B	IVF	6	0	5	4	2	2	0	否	是	移植	已妊娠	临床妊娠	宫内妊娠	双胎宫内妊娠
879	0	C00003747	杨德玲	＜35	34	3	拮抗剂方案	2	175	＞10天	12	≤3000	2100	HCG	3	0	0	原发不孕	1.3	≤24	22.4	混合因素	5	0.63	1153	0.58	4	7.16	9.37	43	1	45	17	B	ICSI	3	1	3	2	0	0	0	否	否	全胚冷冻
104	1	C00009297	李秋花	≥35	36	1	刺激方案	1	450	＞10天	13	＞3000	5850	HCG	6	1	1	继发不孕	1.96	≤24	19.1	女方因素	9	16.3	1870	3.58	7	14.34	9.4	13	2	11	1.03	B	IVF	4	0	3	0	0	0	0	否	否	全胚冷冻
145	0	2016060093	刘云	＜35	25	1	降调节方案	3	180	≤10天	10	≤3000	1800	HCG	5	0	0	原发不孕	1.68	＞24	25.9	男方因素	8	2.2	2187	1.47	8	7.5	9.46	59.09	1	43	16.9	A	IVF	4	0	4	1	0	0	0	否	否	全胚冷冻
1087	1	2018060022	孟桂英	≥35	35	2	降调节方案	3	300	＞10天	11	＞3000	3300	HCG	2	3	1	原发不孕	2.44	≤24	21.2	女方因素	4	2.41	1491	1.24	3	8.41	9.57	66.43	2	13	9.6	A	IVF	2	0	2	0	2	2	0	否	是	移植	已妊娠	临床妊娠	宫内妊娠	单胎宫内妊娠
707	1	2016080086	陈雪唤	＜35	34	1	刺激方案	1	300	≤10天	8	≤3000	2400	HCG	5	1	1	继发不孕	1.83	≤24	22.4	女方因素	5	5.8	1661	0.79	4	9.81	9.85	53	1	6	5.4	B	IVF	4	0	2	0	0	0	0	否	否	全胚冷冻
1386	1	C00010258	胡建琳	≥35	43	1	降调节方案	3	401.786	＞10天	14	＞3000	5625	HCG	1	5	2	继发不孕	3.08	≤24	20.7	女方因素	3	2.55	911	0.71	4	7.7	9.92	38.33	2	9	0.84	A-B	IVF	2	0	2	2	2	2	0	否	是	移植	已妊娠	临床妊娠	宫内妊娠	单胚胎停
536	1	2016090195	李因美	＜35	26	1	降调节方案	3	293.75	＞10天	12	＞3000	3525	HCG	2	3	1	原发不孕	2.67	＞24	27	女方因素	6	0.66	2055	1.41	7	9.89	9.93	25.93	1	26	16.4	B	IVF	6	0	2	0	0	0	0	否	否	全胚冷冻
[truncated: 6 more columns]
